# Supplementary material for: Phage Resistance in Vibrio harveyi: Evolutionary strategies and physiological trade-offs
Source: Research Square preprint supplement (doi:10.21203/rs.3.rs-7655806/v1), 2025-10-10
Supplement: Supplementary file 1 [file 11967e9dab0f05246accb2f6.xlsx]

## Sheet: Sheet1
gene_id	transcript_id	gene_name	type	biotypes	description	gc	featWidth	GO BP	GO MF	GO CC	isPresent	log2 Ratio	pValue	fdr	seqnames	start	end	width	strand	log2 Mean	R10D4_1 [normalized count]	R10D4_2 [normalized count]	R10D4_3 [normalized count]	R3D4_1 [normalized count]	R3D4_2 [normalized count]	R3D4_3 [normalized count]	R4D4_1 [normalized count]	R4D4_2 [normalized count]	R4D4_3 [normalized count]	VH2_T10_1 [normalized count]	VH2_T10_2 [normalized count]	VH2_T10_3 [normalized count]	VH2_T25_1 [normalized count]	VH2_T25_2 [normalized count]	VH2_T25_3 [normalized count]	VH2_T45_1 [normalized count]	VH2_T45_2 [normalized count]	VH2_T45_3 [normalized count]	VH2_WT1 [normalized count]	VH2_WT2 [normalized count]	VH2_WT3 [normalized count]	R10D4_1 [FPKM]	R10D4_2 [FPKM]	R10D4_3 [FPKM]	R3D4_1 [FPKM]	R3D4_2 [FPKM]	R3D4_3 [FPKM]	R4D4_1 [FPKM]	R4D4_2 [FPKM]
pgaptmp_000215	pgaptmp_000215	pgaptmp_000215	protein_coding	protein_coding	pgaptmp_000215	0.4795	684				TRUE	6.44658	2.95086e-11	1.55304e-07	Chromosome_I	233990	234673	684	+	9.23236	135.682	127.617	130.693	82.6385	75.1002	70.9215	87.61	105.974	97.1188	6108.5	5072.28	5064.98	8086.3	10145.9	8934.97	5470.92	6120.93	5618.73	101.703	99.3965	103.848	8.17383	7.7107	7.97511	6.50864	5.67713	5.07522	6.0986	6.73259
pgaptmp_005233	pgaptmp_005233	pgaptmp_005233	protein_coding	protein_coding	pgaptmp_005233	0.4257	303	GO:0009401	GO:0008982		TRUE	-4.89246	1.02875e-10	1.96839e-07	Chromosome_II	2210716	2211018	303	+	7.79796	708.478	822.909	860.94	1135.16	988.592	995.375	1297.82	1078.4	1227.36	18.162	16.3271	16.6733	29.4583	31.0782	26.3491	57.3048	54.5917	23.8138	1164	1143.7	1207.96	96.3478	112.241	118.596	201.826	168.701	160.797	203.94	154.659
pgaptmp_000400	pgaptmp_000400	pgaptmp_000400	protein_coding	protein_coding	pgaptmp_000400	0.4728	1377				TRUE	5.89442	1.45292e-10	1.96839e-07	Chromosome_I	435859	437235	1377	-	11.8978	1271.25	1274.41	1195.84	864.822	984.496	608.605	991.923	1273.93	1347	9367.57	5560.28	7182.5	60952.1	56843.2	58459.4	18656.1	23260.1	25613.1	921.478	1085.08	1121.55	38.0413	38.2487	36.2477	33.8343	36.9678	21.6339	34.2986	40.2021
pgaptmp_002271	pgaptmp_002271	pgaptmp_002271	protein_coding	protein_coding	pgaptmp_002271	0.4411	501				TRUE	-7.42833	1.82976e-10	1.96839e-07	Chromosome_I	2464169	2464669	501	+	11.6521	21608.2	27634.8	39560.8	33181.6	23044.8	34133	38943.4	29614.6	31206.1	165.476	121.546	124.124	154.656	162.051	159.412	203.938	181.085	193.156	37944.9	27764.1	25961.9	1777.21	2279.61	3295.85	3567.99	2378.37	3334.8	3701.08	2568.65
pgaptmp_002057	pgaptmp_002057	bioD	protein_coding	protein_coding	pgaptmp_002057	0.4664	684	GO:0009102	GO:0000287,GO:0004141,GO:0005524		TRUE	-6.36127	1.87003e-10	1.96839e-07	Chromosome_I	2222016	2222699	684	-	10.2834	7580.48	9970.84	11653.7	11644.3	10424.6	10215.2	10366.9	9221.26	8993.34	102.918	96.1484	101.893	97.2123	71.0359	65.8727	74.1592	94.5369	71.4414	7264.53	8047.3	7247.74	456.666	602.445	711.131	917.113	788.038	731.008	721.65	585.83
pgaptmp_001887	pgaptmp_001887	pgaptmp_001887	protein_coding	protein_coding	pgaptmp_001887	0.4444	1125				TRUE	-5.54849	4.06179e-10	2.48766e-07	Chromosome_I	2026712	2027836	1125	-	10.3176	9170.13	9874.03	10038.9	6185.08	6722.15	4931.52	10672.1	11363.1	10892.8	115.026	92.5202	101.893	110.469	115.433	89.5869	150.004	130.488	146.852	4870.03	6511.11	5558.76	335.878	362.73	372.454	296.181	308.958	214.566	451.678	438.918
pgaptmp_000166	pgaptmp_000166	cadB	protein_coding	protein_coding	pgaptmp_000166	0.4744	1347		GO:0043872		TRUE	-6.22937	5.03927e-10	2.48766e-07	Chromosome_I	173853	175199	1347	+	12.2264	43792.3	39169.6	35770.7	19275.9	20403.4	14857.2	18097.4	25387.6	22119.2	298.665	487.999	329.761	506.682	367.389	403.141	610.128	721.676	812.315	29257.6	35731.8	38976.9	1339.64	1201.78	1108.41	770.924	783.21	539.887	639.707	819.013
pgaptmp_002266	pgaptmp_002266	pgaptmp_002266	protein_coding	protein_coding	pgaptmp_002266	0.4632	1548				TRUE	-5.17533	5.7027e-10	2.48766e-07	Chromosome_I	2457020	2458567	1548	+	12.8403	39559.9	46254.5	47795.2	38983.6	40810.2	32680	41893.9	46495.8	43678.8	916.174	1008.65	983.726	924.99	746.987	848.44	517.429	572.548	702.507	29239.2	36454.3	32051.5	1053.03	1234.88	1288.71	1356.67	1363.14	1033.34	1288.58	1305.21
pgaptmp_004646	pgaptmp_004646	pgaptmp_004646	protein_coding	protein_coding	pgaptmp_004646	0.3958	960				TRUE	-3.93739	5.78371e-10	2.48766e-07	Chromosome_II	1556390	1557349	960	-	10.4944	4957.03	5706.68	5807.67	6422.1	6206.69	4931.52	7291.67	6753.25	7476.04	254.268	243.092	125.976	219.464	209.778	227.92	495.518	312.904	280.474	3752.97	3951.01	3368.82	212.769	245.671	252.506	360.388	334.297	251.445	361.65	305.688
pgaptmp_004131	pgaptmp_004131	dcuC	protein_coding	protein_coding	pgaptmp_004131	0.4664	1368	GO:0015740	GO:0015556		TRUE	-4.60629	5.82441e-10	2.48766e-07	Chromosome_II	946011	947378	1368	-	11.9501	12149	15517.3	16181.4	20590.4	20474.4	19834.9	28392.3	25983.1	24312.1	417.727	449.902	339.024	633.353	628.224	698.251	465.18	426.082	432.617	15152.1	19349.2	16854.1	365.941	468.784	493.709	810.856	773.871	709.704	988.206	825.358
pgaptmp_003239	pgaptmp_003239	ilvD	protein_coding	protein_coding	pgaptmp_003239	0.4897	1842	GO:0009082	GO:0004160		TRUE	3.47518	6.25233e-10	2.48766e-07	Chromosome_I	3506740	3508581	1842	+	10.7818	1200.33	954.927	1077.4	636.124	693.653	687.774	814.476	986.606	971.188	2891.8	2855.43	2923.39	7726.91	7702.96	7956.1	4142.8	4788.1	5326.35	718.071	719.351	775.95	26.8515	21.4251	24.4134	18.6044	19.4714	18.2763	21.0534	23.2751
pgaptmp_002743	pgaptmp_002743	raiA	protein_coding	protein_coding	pgaptmp_002743	0.4159	327	GO:0009386,GO:0036211	GO:0045182	GO:0005840	TRUE	-6.96394	6.68224e-10	2.48766e-07	Chromosome_I	2970164	2970490	327	+	14.2632	101754	129152	156216	106241	89263.5	124741	221811	128947	155399	456.069	1823.19	765.12	889.64	718.129	999.947	5358	4138.32	9796.73	137144	112795	98698.5	12822.2	16322.8	19939.7	17502.9	14114.6	18672.1	32297.4	17135.6
pgaptmp_000096	pgaptmp_000096	pgaptmp_000096	protein_coding	protein_coding	pgaptmp_000096	0.4324	222				TRUE	-4.56525	7.31434e-10	2.48766e-07	Chromosome_I	102888	103109	222	+	10.8885	5861.33	8156.04	8821.77	7119.08	4817.34	8475.12	9285.17	7320.44	7276.17	240.142	185.04	216.753	272.489	269.715	259.538	647.207	535.265	526.55	7742.31	7154	5861.99	1087.93	1518.34	1658.61	1727.57	1122.01	1868.64	1991.45	1432.92
pgaptmp_003238	pgaptmp_003238	ilvE	protein_coding	protein_coding	pgaptmp_003238	0.4899	939	GO:0009081	GO:0004084		TRUE	3.68471	7.57708e-10	2.48766e-07	Chromosome_I	3505788	3506726	939	+	9.44719	483.369	362.608	425.569	256.884	263.534	270.491	286.589	372.403	365.251	1297.58	1132.01	1156.02	3219.79	3782.66	3479.4	1565.77	1914.71	1988.45	269.905	266.969	306.558	21.2115	15.9593	18.9167	14.7379	14.5116	14.1	14.532	17.2339
pgaptmp_004312	pgaptmp_004312	focA	protein_coding	protein_coding	pgaptmp_004312	0.4442	1452	GO:0015724	GO:0015499	GO:0005886	TRUE	-8.11701	7.73338e-10	2.48766e-07	Chromosome_II	1167435	1168886	1452	-	11.6379	41065.5	38359.9	45677.2	53121.8	47145.2	37002.9	71352.4	79334.4	77673.2	121.08	97.9626	77.8088	51.552	91.0148	105.396	143.262	98.5314	92.6092	22800	28861.3	29269.3	1165.38	1091.82	1313.03	1970.93	1678.86	1247.39	2339.78	2374.28
pgaptmp_004423	pgaptmp_004423	cobA	protein_coding	protein_coding	pgaptmp_004423	0.4585	759	GO:0019354	GO:0004851		TRUE	-4.85121	8.15604e-10	2.48766e-07	Chromosome_II	1293073	1293831	759	-	9.20059	1776.98	2569.94	3060.67	4336.92	3884.73	3683.79	4207.51	3992.69	3949.5	82.7381	54.4236	79.6614	54.4978	54.3869	71.1425	79.2155	58.5863	70.1184	2227.98	2224.32	1799.47	96.4713	139.934	168.312	307.825	264.645	237.567	263.946	228.592
pgaptmp_005220	pgaptmp_005220	pgaptmp_005220	protein_coding	protein_coding	pgaptmp_005220	0.4845	741				TRUE	-5.43846	8.55096e-10	2.48766e-07	Chromosome_II	2190804	2191544	741	-	8.75666	3761.33	3511.67	3070.47	2683.51	3100.96	2351.95	3850.38	4768.1	4544.18	28.252	14.513	31.494	32.4041	29.9683	38.2062	37.0796	30.6246	68.7954	1507.11	1952.25	2309.57	209.161	195.856	172.953	195.096	216.382	155.362	247.411	279.617
pgaptmp_000874	pgaptmp_000874	pgaptmp_000874	protein_coding	protein_coding	pgaptmp_000874	0.4653	288				TRUE	-5.61362	8.56704e-10	2.48766e-07	Chromosome_I	920871	921158	288	+	10.2505	6399.43	8735.16	8183.01	8447.06	7447.21	11364.8	11322.5	7830.16	8578.83	110.99	92.5202	122.271	100.158	114.323	71.1425	112.924	110.515	116.423	4901.88	5838.27	5458.23	915.603	1253.49	1185.94	1580.07	1337.04	1931.53	1871.9	1181.45
pgaptmp_003005	pgaptmp_003005	pgaptmp_003005	protein_coding	protein_coding	pgaptmp_003005	0.4739	918	GO:0009234	GO:0046428	GO:0016020	TRUE	-4.12025	8.98073e-10	2.48766e-07	Chromosome_I	3253099	3254016	918	+	12.7428	30096.8	32603	35849.1	19465.5	18026.1	14974.3	30702.8	31706.5	29866.8	1438.84	1647.22	1391.3	1159.18	1311.94	1338.53	785.413	922.734	1038.55	21876.9	25404.1	23591.7	1350.94	1467.77	1629.96	1142.32	1015.32	798.431	1592.46	1500.87
pgaptmp_001206	pgaptmp_001206	pgaptmp_001206	protein_coding	protein_coding	pgaptmp_001206	0.4756	513				TRUE	-5.01131	1.09488e-09	2.79049e-07	Chromosome_I	1285666	1286178	513	-	9.97819	7268.26	8918.22	8676.38	4819.94	3990.55	3924.6	10194.7	7936.13	8224.13	62.5581	107.033	92.6295	100.158	106.554	151.507	55.6194	115.841	71.4414	3913.35	4604.1	4594.22	583.81	718.46	705.931	506.161	402.216	374.464	946.213	672.247
pgaptmp_001112	pgaptmp_001112	pgaptmp_001112	protein_coding	protein_coding	pgaptmp_001112	0.4535	333				TRUE	-4.58505	1.15654e-09	2.79049e-07	Chromosome_I	1184583	1184915	333	-	8.10233	1751.54	1749.67	1758.64	1131.96	933.974	987.953	1775.96	1563.49	1601.76	38.3421	39.9107	35.1992	30.9312	32.1882	44.7934	33.7087	17.3096	25.1368	1022.62	1073.61	1273.59	216.737	217.147	220.431	183.126	145.022	145.219	253.934	204.028
pgaptmp_000341	pgaptmp_000341	pgaptmp_000341	protein_coding	protein_coding	pgaptmp_000341	0.4629	1875	GO:0006790,GO:0019344	GO:0004783,GO:0010181,GO:0050660	GO:0009337	TRUE	3.61591	1.16738e-09	2.79049e-07	Chromosome_I	358091	359965	1875	+	9.29285	330.726	295.719	288.341	186.417	206.184	182.252	200.463	230.606	230.833	2074.51	1832.26	2097.13	2493.64	2861.42	2911.57	2288.82	2725.59	1984.48	229.112	247.217	215.172	7.26817	6.51808	6.41869	5.3561	5.68589	4.75777	5.09057	5.3445
pgaptmp_003579	pgaptmp_003579	pgaptmp_003579	protein_coding	protein_coding	pgaptmp_003579	0.474	1344	GO:0006508	GO:0008270		TRUE	3.5164	1.22616e-09	2.79049e-07	Chromosome_II	332332	333675	1344	+	9.42811	305.285	267.556	255.668	354.897	382.328	285.335	317.029	511.214	437.738	1057.43	896.176	952.232	3636.62	3770.45	3800.85	1319.7	1533.89	1813.82	298.963	339.605	380.498	9.35977	8.22728	7.93996	14.2255	14.7089	10.3918	11.2314	16.5288
pgaptmp_001861	pgaptmp_001861	pgaptmp_001861	protein_coding	protein_coding	pgaptmp_001861	0.4861	2448	GO:0009061	GO:0009055,GO:0009389,GO:0030151,GO:0043546,GO:0051539		TRUE	-3.83198	1.2725e-09	2.79049e-07	Chromosome_I	1991306	1993753	2448	-	8.89042	3646.46	2774.13	2234.03	2114.01	2900.23	2057.55	2006.12	3113.55	2756.63	48.4321	88.892	66.6933	69.2269	75.4757	77.7298	50.5631	43.9397	56.8885	1072.92	1280.05	1375.77	61.3789	46.8335	38.0907	46.5221	61.2584	41.1407	39.0192	55.2691
pgaptmp_000502	pgaptmp_000502	pgaptmp_000502	protein_coding	protein_coding	pgaptmp_000502	0.4792	432				TRUE	4.13384	1.37654e-09	2.89788e-07	Chromosome_I	517124	517555	432	+	7.64987	418.611	266.675	351.237	36.5147	38.9156	28.8634	39.3502	32.0908	25.3353	1015.06	1442.23	1343.13	1087.01	879.07	1030.25	441.584	527.276	549.04	57.5574	43.9639	54.8316	39.9287	25.5118	33.9358	4.55353	4.65783	3.27037	4.33707	3.22801
pgaptmp_003006	pgaptmp_003006	rraA	protein_coding	protein_coding	pgaptmp_003006	0.4545	528	GO:0051252	GO:0008428		TRUE	-3.68705	1.59444e-09	2.99566e-07	Chromosome_I	3254092	3254619	528	+	12.5847	20766.3	22662.1	22540.4	16300.9	15229	13151	23903.4	22407.6	23014.3	1501.39	1493.02	1406.12	1322.68	1268.66	1292.42	1215.2	1360.8	1315.05	15907.1	19316.1	18302.9	1620.63	1773.82	1781.84	1663.19	1491.35	1219.15	2155.55	1844.16
pgaptmp_002937	pgaptmp_002937	pgaptmp_002937	protein_coding	protein_coding	pgaptmp_002937	0.4612	438				TRUE	-3.92836	1.64301e-09	2.99566e-07	Chromosome_I	3196208	3196645	438	+	11.281	6484.23	9511.42	9850.16	7824.39	6313.88	7375.01	9839.79	8824.23	8739.29	542.843	469.857	485.379	363.81	479.493	428.173	751.704	619.15	822.899	7057.21	7361.08	6545.73	610.018	897.456	938.664	962.367	745.36	824.179	1069.66	875.467
pgaptmp_003100	pgaptmp_003100	pgaptmp_003100	protein_coding	protein_coding	pgaptmp_003100	0.5069	2322		GO:0003676,GO:0003729	GO:0005829	TRUE	4.18891	1.64481e-09	2.99566e-07	Chromosome_I	3356864	3359185	2322	+	11.65	1745.37	1496.2	1493.17	978.85	1015.9	971.46	1018.65	1203.78	1233.69	7418.18	6688.67	7730.86	22051	21101	21442.9	8659.77	10218	11962.5	1106.44	1149.43	1494.58	30.973	26.6298	26.8403	22.7101	22.6221	20.4784	20.888	22.528
pgaptmp_002472	pgaptmp_002472	ligA	protein_coding	protein_coding	pgaptmp_002472	0.4625	2013	GO:0006260,GO:0006281	GO:0003677,GO:0003911		TRUE	5.22769	1.65929e-09	2.99566e-07	Chromosome_I	2688275	2690287	2013	-	13.0095	3001.2	2676.44	2501.14	2151.16	2550.68	1674.9	2107.09	2922.5	2708.77	35230.3	25660.7	32877.9	80756.9	81125.2	74445.4	30553.6	34804.2	34180.7	1904.43	2016.6	2781.46	61.4341	54.9483	51.8602	57.5697	65.5172	40.7266	49.8394	63.0883
pgaptmp_001081	pgaptmp_001081	pabC	protein_coding	protein_coding	pgaptmp_001081	0.4571	816	GO:0046656	GO:0008696,GO:0030170		TRUE	4.5105	1.74143e-09	2.99566e-07	Chromosome_I	1150442	1151257	816	+	11.2187	1023.01	959.327	986.732	634.202	801.524	580.567	619.952	717.192	710.797	7676.49	4952.55	6154.31	16729.4	19763.5	18415.4	9585.07	10163.4	11105.2	842.686	695.776	1003.58	51.6595	48.5868	50.4719	41.8699	50.7891	34.8253	36.1743	38.1929
pgaptmp_002889	pgaptmp_002889	pgaptmp_002889	protein_coding	protein_coding	pgaptmp_002889	0.4249	273				TRUE	-4.59088	1.7645e-09	2.99566e-07	Chromosome_I	3141035	3141307	273	-	11.1075	10681.9	14706.8	15272.3	9550.19	9913.91	11468.7	12342.6	10059.3	10011.7	300.683	344.683	314.94	279.854	257.505	227.92	350.571	356.844	247.399	7533.32	7094.11	5567.9	1612.29	2226.36	2334.98	1884.58	1877.7	2056.28	2152.67	1601.2
pgaptmp_002706	pgaptmp_002706	pgaptmp_002706	protein_coding	protein_coding	pgaptmp_002706	0.4452	447				TRUE	-4.38509	1.98651e-09	3.10449e-07	Chromosome_I	2929160	2929606	447	+	9.47361	3932.48	4647.9	4774.38	2458.02	1957.39	2786.56	5314.51	3688.95	3809.45	68.6121	70.7507	100.04	95.7394	89.9048	111.984	109.553	114.51	104.516	2699.05	2438.4	1983.91	362.507	429.725	445.81	296.238	226.419	305.136	566.094	358.619
pgaptmp_005092	pgaptmp_005092	pgaptmp_005092	protein_coding	protein_coding	pgaptmp_005092	0.4357	1407		GO:0008270,GO:0016805		TRUE	-4.75073	2.01192e-09	3.10449e-07	Chromosome_II	2054189	2055595	1407	-	9.29805	2365.19	3169.3	3196.26	2745.65	2484.45	3087.56	4511.17	3684.47	3701.07	113.008	50.7954	61.1355	86.9019	62.1564	79.0472	92.699	83.8849	109.808	2496.21	2674.15	2009.66	69.2676	93.0917	94.8176	105.127	91.302	107.412	152.661	113.794
pgaptmp_004845	pgaptmp_004845	pgaptmp_004845	protein_coding	protein_coding	pgaptmp_004845	0.4372	915	GO:0000160,GO:0006935	GO:0000156		TRUE	-3.35481	2.04353e-09	3.10449e-07	Chromosome_II	1770267	1771181	915	+	11.5563	7677.62	8596.1	8419.89	6719.98	6007.34	5037.08	13214.3	11791.5	11460	895.994	950.6	848.487	639.245	759.196	781.25	881.483	655.101	689.277	8078.72	7977.85	7896.58	345.751	388.259	384.084	395.65	339.473	269.457	687.629	559.997
pgaptmp_000503	pgaptmp_000503	pgaptmp_000503	protein_coding	protein_coding	pgaptmp_000503	0.5052	576				TRUE	4.14861	2.06455e-09	3.10449e-07	Chromosome_I	517552	518127	576	+	8.45478	787.112	456.781	672.252	64.7015	74.4175	61.0255	74.9882	59.7038	56.3008	1753.65	2343.85	2256.46	1796.95	1374.1	1724.55	660.691	920.071	812.315	101.703	82.8305	83.0781	56.3083	32.7738	48.7136	6.0514	6.68031	5.18587	6.19874	4.50419
pgaptmp_003240	pgaptmp_003240	ilvA	protein_coding	protein_coding	pgaptmp_003240	0.491	1548	GO:0009097	GO:0004794		TRUE	2.87832	2.30919e-09	3.348e-07	Chromosome_I	3508586	3510133	1548	+	10.173	881.165	815.868	833.167	543.877	596.023	493.152	598.421	694.057	695.314	1769.79	1498.46	1633.99	4118.27	4312.1	4368.68	1794.99	2240.92	2361.54	580.045	608.485	640.533	23.4555	21.7816	22.4648	18.9275	19.9084	15.5935	18.4064	19.4833
pgaptmp_004022	pgaptmp_004022	narQ	protein_coding	protein_coding	pgaptmp_004022	0.4266	1737	GO:0000160	GO:0000155,GO:0046983	GO:0016020	TRUE	-2.91859	2.43859e-09	3.348e-07	Chromosome_II	789724	791460	1737	+	11.5299	5411.11	6065.77	6039.65	9368.26	8810.62	7040.2	8992.64	9175.73	9431.78	912.138	1186.44	989.284	830.723	836.892	824.726	744.962	786.92	773.949	6788.98	6836.06	6587.27	128.364	144.32	145.128	290.552	262.271	198.389	246.502	229.551
pgaptmp_004422	pgaptmp_004422	pgaptmp_004422	protein_coding	protein_coding	pgaptmp_004422	0.4558	441				TRUE	-3.76441	2.48492e-09	3.348e-07	Chromosome_II	1292611	1293051	441	+	7.18167	422.466	633.684	655.098	862.259	862.97	460.165	683.061	705.251	744.578	20.18	25.3977	20.3785	17.675	21.0888	21.0793	20.2252	22.6356	31.7517	378.873	447.284	376.344	39.474	59.3849	62.0024	105.333	101.181	51.0749	73.7485	69.4933
pgaptmp_002772	pgaptmp_002772	lgt	protein_coding	protein_coding	pgaptmp_002772	0.4684	822	GO:0009249	GO:0008961	GO:0016020	TRUE	4.76274	2.56784e-09	3.348e-07	Chromosome_I	3002007	3002828	822	-	12.9123	2742.17	2223.18	2648.98	1789.86	2205.9	2025.39	1718.79	1960.52	2102.83	37236.2	33087.8	36557.2	69135.6	48686.2	56405.5	34438.5	38117	35309.3	2069.27	2312.88	2425.88	137.462	111.775	134.508	117.304	138.758	120.606	99.5597	103.642
pgaptmp_000208	pgaptmp_000208	pgaptmp_000208	protein_coding	protein_coding	pgaptmp_000208	0.4399	291		GO:0005524,GO:0140662		TRUE	6.06337	2.59604e-09	3.348e-07	Chromosome_I	226729	227019	291	+	12.3183	1232.71	1235.68	996.534	827.666	1185.22	1164.43	766.216	923.917	921.925	18375.9	17600.6	22357.1	94614.1	62602.6	65795	51409.2	51390.8	54946.4	1048.33	1077.43	1406.51	174.552	175.492	142.935	153.224	210.596	195.864	125.369	137.968
pgaptmp_003266	pgaptmp_003266	pgaptmp_003266	protein_coding	protein_coding	pgaptmp_003266	0.4658	672	GO:0006865	GO:0042626,GO:0140359		TRUE	3.30084	2.64667e-09	3.348e-07	Chromosome_I	3532957	3533628	672	-	10.5117	602.091	570.316	621.608	449.067	507.951	413.159	440.277	467.929	421.552	7317.28	6786.63	7008.35	5364.35	5056.87	5902.19	5499.58	6247.43	4285.16	630.897	521.195	584.87	36.9191	35.0742	38.609	36.0003	39.0837	30.0941	31.1953	30.2585
pgaptmp_004026	pgaptmp_004026	pepT	protein_coding	protein_coding	pgaptmp_004026	0.4561	1230	GO:0006508	GO:0008270,GO:0045148		TRUE	-5.64373	2.67178e-09	3.348e-07	Chromosome_II	793633	794862	1230	+	10.9906	10769.8	11489	10861.4	16037.6	14591.3	7877.23	15002.8	17091	17975.4	175.566	197.739	201.932	148.764	184.249	187.078	207.309	222.361	179.927	6838.72	10890.9	11300.3	360.795	386.029	368.571	702.424	613.384	313.474	580.766	603.808
pgaptmp_003481	pgaptmp_003481	pgaptmp_003481	protein_coding	protein_coding	pgaptmp_003481	0.4817	600				TRUE	3.51166	3.0186e-09	3.69462e-07	Chromosome_II	228154	228753	600	+	5.8884	16.1894	15.8421	21.2376	24.9837	29.3574	23.9154	20.0463	22.3889	20.409	143.278	143.316	124.124	343.189	356.29	330.681	202.252	201.057	191.833	27.9405	21.0262	22.4311	1.11183	1.0912	1.47739	2.24321	2.52994	1.95101	1.5908	1.62151
pgaptmp_000505	pgaptmp_000505	pgaptmp_000505	protein_coding	protein_coding	pgaptmp_000505	0.4762	483				TRUE	3.55395	3.13876e-09	3.69648e-07	Chromosome_I	518838	519320	483	+	8.41861	834.909	499.026	763.737	81.9979	71.6866	47.0061	71.2759	74.6298	81.6361	1438.84	1630.9	1771.08	1187.17	1068.87	1360.93	782.042	870.805	769.98	112.321	93.6621	96.3706	71.2279	42.699	65.999	9.14576	7.67423	4.76365	7.02633	6.71433
pgaptmp_001147	pgaptmp_001147	pgaptmp_001147	protein_coding	protein_coding	pgaptmp_001147	0.4704	1065	GO:0055085	GO:0022857	GO:0016020	TRUE	2.85177	3.16467e-09	3.69648e-07	Chromosome_I	1216454	1217518	1065	-	9.26929	372.356	349.406	320.198	241.509	314.738	202.868	233.874	211.202	209.72	2147.16	2420.04	2615.86	1707.11	1743.71	1760.12	1580.94	1816.17	1808.53	229.112	249.766	266.681	14.4068	13.5589	12.549	12.2166	15.2807	9.3239	10.456	8.6176
pgaptmp_003236	pgaptmp_003236	ilvG	protein_coding	protein_coding	pgaptmp_003236	0.5052	1647	GO:0009082	GO:0000287,GO:0003984,GO:0030976,GO:0050660		TRUE	3.71793	3.28304e-09	3.69648e-07	Chromosome_I	3503833	3505479	1647	+	10.3059	779.403	588.798	703.291	443.942	469.035	475.834	513.038	622.412	609.456	2796.95	2488.97	2667.73	5841.58	7384.41	7301.33	2194.44	3059.8	3533.7	497.341	509.089	630.563	19.4996	14.7746	17.8231	14.521	14.725	14.1415	14.8316	16.4218
pgaptmp_001084	pgaptmp_001084	pgaptmp_001084	protein_coding	protein_coding	pgaptmp_001084	0.4559	963				TRUE	3.74573	3.37969e-09	3.69648e-07	Chromosome_I	1152924	1153886	963	+	11.5684	1968.94	1741.75	1782.32	1124.91	1139.48	851.883	1158.23	1462.74	1372.33	5186.27	3283.56	4598.13	17040.1	18224	17444.4	9126.63	8982.34	9541.4	1262.35	1239.91	1661.56	84.2488	74.7483	77.2505	62.9296	61.1818	43.2998	57.2668	66.0054
pgaptmp_003149	pgaptmp_003149	pgaptmp_003149	protein_coding	protein_coding	pgaptmp_003149	0.4701	636		GO:0032934		TRUE	2.93981	3.42103e-09	3.69648e-07	Chromosome_I	3412108	3412743	636	-	10.9961	1500.99	1312.25	1304.48	778.98	985.861	757.046	739.487	899.289	896.59	4189.38	4259.56	4244.29	6913.86	6842.76	7340.85	4990.57	5412.57	5642.55	997.476	880.551	1024.35	97.2474	85.2712	85.6093	65.9832	80.1498	58.2637	55.3613	61.444
pgaptmp_002861	pgaptmp_002861	parE	protein_coding	protein_coding	pgaptmp_002861	0.4923	1881	GO:0006265	GO:0003677,GO:0003918,GO:0005524	GO:0005694	TRUE	3.63644	3.44153e-09	3.69648e-07	Chromosome_I	3109669	3111549	1881	-	12.535	3888.53	3034.64	3079.45	1507.99	2058.43	1658.41	1674.98	2226.21	2356.19	11744.8	12205.4	13190.4	26754	23537.3	27706.1	26456.3	27262.6	41176.7	2063.69	2070.12	2520.59	85.1835	66.6746	68.3322	43.1891	56.5837	43.1554	42.3989	51.4297
pgaptmp_004891	pgaptmp_004891	pgaptmp_004891	protein_coding	protein_coding	pgaptmp_004891	0.4382	744				TRUE	-3.14914	3.66025e-09	3.78107e-07	Chromosome_II	1827660	1828403	744	+	8.9503	602.091	622.243	704.925	1176.16	1069.15	1077.84	610.3	586.59	590.454	284.538	246.721	238.984	175.277	173.15	183.126	197.196	246.329	201.094	1891.57	1520.89	1813.6	33.3463	34.5644	39.5468	85.1641	74.3039	70.9112	39.0574	34.2609
pgaptmp_001818	pgaptmp_001818	pgaptmp_001818	protein_coding	protein_coding	pgaptmp_001818	0.4386	399		GO:0046872		TRUE	-3.36866	3.66397e-09	3.78107e-07	Chromosome_I	1947287	1947685	399	-	8.24406	1177.97	1300.81	1360.02	945.538	758.512	1038.26	1579.21	980.635	1182.32	48.4321	43.5389	44.4622	50.0791	58.8266	46.1109	101.126	125.162	87.3173	680.631	649.9	625.578	121.652	134.736	142.27	127.665	98.2955	127.369	188.451	106.8
pgaptmp_002058	pgaptmp_002058	bioC	protein_coding	protein_coding	pgaptmp_002058	0.4428	822	GO:0009102	GO:0010340		TRUE	-4.88882	3.93748e-09	3.94995e-07	Chromosome_I	2222696	2223517	822	-	10.0107	4035.78	5096.76	6153.19	5559.84	5713.08	5955.76	5390.24	4644.96	4689.15	125.116	152.386	168.586	78.0644	130.972	129.11	153.375	126.493	140.237	3709.94	4187.4	3546.61	202.308	256.25	312.442	364.38	359.37	354.648	312.226	245.554
pgaptmp_000504	pgaptmp_000504	pgaptmp_000504	protein_coding	protein_coding	pgaptmp_000504	0.4799	696				TRUE	3.72805	3.97772e-09	3.94995e-07	Chromosome_I	518130	518825	696	+	9.09359	1174.89	685.611	1015.32	118.513	120.16	103.908	132.157	123.885	125.973	2334.83	2927.99	2893.75	1985.49	1783.67	2318.72	1125.87	1404.74	1225.09	177.702	138.9	146.218	69.5576	40.7109	60.8885	9.17317	8.9268	7.30758	9.04097	7.73479
pgaptmp_002888	pgaptmp_002888	pgaptmp_002888	protein_coding	protein_coding		0.5	1000				TRUE	-4.25538	4.36131e-09	4.19176e-07	pgaptmp_002888	1	1000	1000	+	9.65862	4136	4847.68	6693.11	3945.51	3586.38	4765.76	3592.01	3632.98	3433.64	193.728	38.0966	116.713	98.6852	120.983	106.714	128.093	129.156	109.808	2433.06	2763.35	1912.46	170.427	200.344	279.363	212.553	185.439	233.273	171.029	157.87
pgaptmp_003578	pgaptmp_003578	pgaptmp_003578	protein_coding	protein_coding	pgaptmp_003578	0.4957	1386	GO:0006508	GO:0008270		TRUE	3.87399	4.44687e-09	4.19176e-07	Chromosome_II	330947	332332	1386	+	9.15942	218.942	132.898	141.312	258.165	264.899	225.135	265.8	398.523	378.623	1166.41	881.663	1054.12	3349.41	3848.15	3648.03	1382.06	1512.59	1758.25	209.554	239.571	315.697	6.50915	3.96274	4.25555	10.0346	9.88237	7.95081	9.13112	12.4948
pgaptmp_001522	pgaptmp_001522	pgaptmp_001522	protein_coding	protein_coding	pgaptmp_001522	0.4715	1107		GO:0016787		TRUE	-5.95367	4.46017e-09	4.19176e-07	Chromosome_I	1581392	1582498	1107	-	9.87661	11455.1	10453.1	8690.26	9017.21	7940.83	3279.71	6591.54	9599.63	9109.46	52.4681	96.1484	55.5777	64.8082	64.3763	59.2854	48.8776	82.5534	64.8265	3133.81	4754.47	6210.92	426.394	390.248	327.662	438.822	370.904	145.017	283.512	376.829
pgaptmp_000209	pgaptmp_000209	groL	protein_coding	protein_coding	pgaptmp_000209	0.4693	1647	GO:0042026	GO:0140662		TRUE	5.30623	4.7095e-09	4.22695e-07	Chromosome_I	227094	228740	1647	+	14.044	7154.16	5698.76	5163.19	4135.13	5158.02	2981.18	3739.76	5531.56	5089.59	43342.7	37621.3	43209.8	199413	208312	189281	71658	87015.2	85724.4	4411.25	4699.67	6966.93	178.988	142.997	130.847	135.257	161.932	88.5986	108.114	145.946
pgaptmp_003884	pgaptmp_003884	pgaptmp_003884	protein_coding	protein_coding	pgaptmp_003884	0.427	843	GO:0006355	GO:0003700,GO:0043565		TRUE	-2.92322	4.71792e-09	4.22695e-07	Chromosome_II	652806	653648	843	+	10.2996	3294.92	3692.97	3185.64	4187.02	3417.06	4112.62	6110.42	5035.27	5651.19	298.665	319.285	261.215	195.898	213.108	183.126	810.694	501.978	900.956	1557.96	1720.32	1679.01	161.056	181.046	157.728	267.572	209.589	238.794	345.125	259.557
pgaptmp_002297	pgaptmp_002297	udp	protein_coding	protein_coding	pgaptmp_002297	0.4585	759	GO:0009116	GO:0016763		TRUE	-3.40189	4.73855e-09	4.22695e-07	Chromosome_I	2495709	2496467	759	-	13.41	29446.9	32905.8	37936.1	25384.1	17733.2	24436.6	38844.6	32769.2	32859.9	2679.91	2454.51	1982.27	1595.17	1954.6	1670.53	8767.64	6829.29	11373.7	19821	20516.5	18577.9	1598.66	1791.73	2086.18	1801.71	1208.06	1575.91	2436.81	1876.12
pgaptmp_002810	pgaptmp_002810	pgaptmp_002810	protein_coding	protein_coding	pgaptmp_002810	0.4677	945		GO:0051536,GO:1904047		TRUE	-3.15202	5.12127e-09	4.49221e-07	Chromosome_I	3044127	3045071	945	-	9.85626	3563.98	4254.48	4381.48	3774.47	3429.35	2756.04	2652.06	2652.34	2591.24	197.764	194.111	205.638	187.06	219.767	229.237	182.027	195.731	190.51	1920.07	2272.74	2030.43	155.404	186.062	193.522	215.173	187.639	142.754	133.624	121.965
pgaptmp_004890	pgaptmp_004890	pgaptmp_004890	protein_coding	protein_coding	pgaptmp_004890	0.4154	2340				TRUE	-2.92257	5.84455e-09	4.97546e-07	Chromosome_II	1824801	1827140	2340	-	11.0638	3153.07	2970.39	3187.27	3862.87	3795.29	2789.03	1554.71	1861.27	1824.85	1598.26	2289.42	1495.04	830.723	840.222	725.917	1250.59	1351.48	1041.19	6598.43	6002.66	6926.23	55.5235	52.4614	56.8518	88.9321	83.8636	58.3405	31.6348	34.5645
pgaptmp_003265	pgaptmp_003265	pgaptmp_003265	protein_coding	protein_coding	pgaptmp_003265	0.4458	738		GO:0005524,GO:0016887,GO:0042626,GO:0140359		TRUE	2.86037	5.9398e-09	4.97546e-07	Chromosome_I	3532223	3532960	738	-	10.8931	943.609	1044.7	1076.58	731.575	611.043	677.053	758.049	797.792	846.623	7198.22	5164.8	6409.96	5953.52	6068.02	6574.09	4661.91	6091.64	3749.35	960.036	906.675	829.951	52.6859	58.5028	60.8881	53.4031	42.8114	44.9054	48.9073	46.9755
pgaptmp_002771	pgaptmp_002771	pgaptmp_002771	protein_coding	protein_coding	pgaptmp_002771	0.4683	852				TRUE	3.41769	6.01441e-09	4.97546e-07	Chromosome_I	3001146	3001997	852	-	12.9677	4280.16	3382.29	4219.75	3383.69	3551.56	2720.58	2585.98	2979.97	3141.58	27471.1	23099.2	24144.8	37653.6	42023.3	43241.5	12148.6	15930.1	14417.9	3603.21	4213.52	4397.33	207.004	164.064	206.723	213.952	215.538	156.299	144.517	151.988
pgaptmp_003333	pgaptmp_003333	pgaptmp_003333	protein_coding	protein_coding	pgaptmp_003333	0.4242	825	GO:0006355	GO:0003700,GO:0043565		TRUE	-4.5357	6.05613e-09	4.97546e-07	Chromosome_II	69464	70288	825	+	8.15895	563.545	719.936	723.712	1062.13	776.263	781.786	1478.23	1191.09	1299.84	38.3421	36.2824	68.5459	33.877	44.3975	63.2378	65.732	65.2438	74.0874	1470.23	1361.61	1251.16	28.147	36.0646	36.6145	69.3566	48.6518	46.3838	85.3142	62.7377
pgaptmp_001946	pgaptmp_001946	nhaA	protein_coding	protein_coding	pgaptmp_001946	0.4728	1176	GO:0006814,GO:0006885	GO:0015385	GO:0016020	TRUE	3.39909	6.14488e-09	4.97546e-07	Chromosome_I	2100499	2101674	1176	-	11.8552	1941.18	2240.78	2525.64	1536.82	1332.69	1976.73	2136.05	2012.77	1819.92	10061.8	10331.4	10972.9	12471.2	10981.7	11907.1	8732.24	9945.02	9628.71	1328.29	1173.64	1033.49	68.017	78.7468	89.6407	70.4012	58.5956	82.276	86.4842	74.3744
pgaptmp_002119	pgaptmp_002119	pgaptmp_002119	protein_coding	protein_coding	pgaptmp_002119	0.5088	1710				TRUE	3.07498	6.38403e-09	5.09078e-07	Chromosome_I	2303167	2304876	1710	-	8.92038	383.149	332.684	418.217	178.089	266.264	305.952	277.679	302.997	269.54	692.175	800.028	789.204	1721.84	1374.1	1410.99	1110.7	1163.74	1172.17	181.054	184.776	179.449	9.23271	8.0404	10.2081	5.61055	8.05121	8.7577	7.73178	7.6998
pgaptmp_002168	pgaptmp_002168	pgaptmp_002168	protein_coding	protein_coding	pgaptmp_002168	0.4489	978				TRUE	-2.88724	6.5885e-09	5.10326e-07	Chromosome_I	2351124	2352101	978	-	9.41488	1329.84	1416.11	1609.16	1010.88	966.062	795.805	1167.89	1242.59	1401.89	399.565	384.594	450.18	172.331	207.558	212.11	296.637	350.186	289.735	1517.17	1629.21	1687.32	56.0298	59.841	68.6753	55.6833	51.0752	39.8291	56.8583	55.2109
pgaptmp_000109	pgaptmp_000109	plsB	protein_coding	protein_coding	pgaptmp_000109	0.4705	2427	GO:0008654	GO:0004366	GO:0005886	TRUE	2.70751	6.59361e-09	5.10326e-07	Chromosome_I	112636	115062	2427	-	11.7036	2281.93	2202.93	2080.47	1465.71	1504.74	1193.3	1277.77	1488.86	1403.3	9133.48	10062.9	10854.3	10789.1	11279.2	11489.5	5103.5	5648.25	5459.98	1813.34	1701.85	1929.07	38.7428	37.5122	35.7793	32.5344	32.0578	24.0664	25.0677	26.6577
pgaptmp_001085	pgaptmp_001085	pgaptmp_001085	protein_coding	protein_coding	pgaptmp_001085	0.4284	768		GO:0004536		TRUE	2.97489	6.78309e-09	5.17383e-07	Chromosome_I	1153877	1154644	768	+	11.2795	1756.16	1835.04	1728.41	1209.47	1242.57	1147.11	1559.16	1297.81	1476.49	2762.65	1892.13	2284.24	10155.7	11536.7	10767.6	5327.66	5342	5297.25	1483.08	1296.62	1592.61	94.224	98.7477	93.935	84.8394	83.6571	73.1102	96.6635	73.4324
pgaptmp_002803	pgaptmp_002803	pgaptmp_002803	protein_coding	protein_coding	pgaptmp_002803	0.4617	483				TRUE	-3.07365	6.93484e-09	5.21401e-07	Chromosome_I	3037160	3037642	483	-	10.7469	3570.91	5071.23	4992.47	5308.72	4641.19	4865.54	6803.88	5999.49	5871.47	439.925	424.504	533.546	396.214	379.598	418.95	525.856	474.016	443.201	3970.35	3735.02	3170.26	304.642	433.918	431.429	592.117	496.851	493.08	670.721	539.765
pgaptmp_002120	pgaptmp_002120	pgaptmp_002120	protein_coding	protein_coding	pgaptmp_002120	0.4931	1515				TRUE	3.37517	7.15761e-09	5.27864e-07	Chromosome_I	2304923	2306437	1515	-	8.0843	220.484	185.705	202.574	87.7634	130.401	103.908	114.338	138.065	145.678	573.113	531.538	666.933	969.177	1014.48	1152.77	598.33	597.846	641.65	92.7625	85.3791	120.463	5.99684	5.06584	5.581	3.12079	4.45055	3.35715	3.59346	3.96012
pgaptmp_004751	pgaptmp_004751	clcA	protein_coding	protein_coding	pgaptmp_004751	0.4677	1407	GO:0006821,GO:0055085	GO:0005247	GO:0005886	TRUE	-2.96616	7.2214e-09	5.27864e-07	Chromosome_II	1670354	1671760	1407	+	11.8224	5502.85	6790.98	7477.27	7121.65	7144.76	7142.45	10473.8	9867.55	9528.9	1553.86	1863.1	1543.21	966.231	931.237	1003.9	1321.38	1431.37	1353.42	7602.05	9073.12	7595	161.158	199.471	221.814	272.678	262.565	248.477	354.442	304.756
pgaptmp_000214	pgaptmp_000214	pgaptmp_000214	protein_coding	protein_coding	pgaptmp_000214	0.4801	1404				TRUE	8.75471	7.32828e-09	5.28339e-07	Chromosome_I	232343	233746	1404	+	11.1355	491.849	337.085	308.762	176.808	208.915	86.5902	125.475	245.532	242.093	53073.5	33497.8	40957.1	79340	113063	90157.3	29935	33628.5	35240.5	137.467	192.422	345.605	14.4352	9.92233	9.17905	6.7842	7.69391	3.0188	4.25524	7.59938
pgaptmp_002393	pgaptmp_002393	pgaptmp_002393	protein_coding	protein_coding	pgaptmp_002393	0.4943	1224	GO:0006633	GO:0004315		TRUE	3.4833	7.8833e-09	5.55767e-07	Chromosome_I	2604593	2605816	1224	+	11.2771	1965.08	1627.34	1492.35	903.899	1200.92	774.364	843.431	1261.99	1182.32	4116.73	3483.11	3775.58	13297.5	12456.8	13662	4599.55	5448.52	6677.13	1066.77	1149.43	1517.01	66.1542	54.9462	50.8897	39.7835	50.7314	30.9668	32.8096	44.8035
pgaptmp_005155	pgaptmp_005155	pgaptmp_005155	protein_coding	protein_coding	pgaptmp_005155	0.4327	513				TRUE	-2.83889	7.96023e-09	5.55767e-07	Chromosome_II	2122874	2123386	513	+	9.11163	1006.83	1164.39	1516.04	1461.23	1211.84	1523.16	2135.31	1488.86	1579.94	191.71	217.695	198.227	181.168	174.26	148.872	131.464	125.162	101.87	1295.32	1307.45	1402.36	80.8714	93.8047	123.348	153.449	122.144	145.332	198.187	126.117
pgaptmp_005254	pgaptmp_005254	pgaptmp_005254	protein_coding	protein_coding	pgaptmp_005254	0.4536	183		GO:0003677		TRUE	-3.12182	8.02551e-09	5.55767e-07	Chromosome_II	2233013	2233195	183	-	7.63913	506.496	462.061	551.361	506.081	436.264	423.055	670.439	733.611	791.026	76.6841	79.8213	62.9881	58.9165	51.0571	65.8727	15.1689	39.9452	31.7517	568.869	662.644	596.501	114.047	104.349	125.755	148.982	123.266	113.156	174.438	174.202
pgaptmp_004285	pgaptmp_004285	pgaptmp_004285	protein_coding	protein_coding	pgaptmp_004285	0.4706	954		GO:0003824		TRUE	3.72603	8.6266e-09	5.88705e-07	Chromosome_II	1137779	1138732	954	-	9.57657	346.915	342.365	316.93	322.226	329.076	226.784	402.412	506.736	489.817	1791.99	1295.28	1324.6	3666.08	4862.63	4524.14	1168.01	1671.04	1961.99	275.493	368.277	382.159	14.9842	14.8314	13.8662	18.196	17.8357	11.6358	20.0842	23.0819
pgaptmp_000342	pgaptmp_000342	cysI	protein_coding	protein_coding	pgaptmp_000342	0.4577	1737	GO:0000103,GO:0008652	GO:0004783,GO:0050661,GO:0051539	GO:0009337	TRUE	2.89339	8.72486e-09	5.88705e-07	Chromosome_I	359965	361701	1737	+	9.41433	525.769	488.465	439.455	320.304	363.895	273.79	353.41	405.24	411.699	1622.47	1171.92	1337.57	2338.99	2491.81	2196.2	1053.4	1423.38	873.173	344.227	344.702	292.435	12.4725	11.6218	10.5598	9.93407	10.8323	7.71526	9.68749	10.1379
pgaptmp_002814	pgaptmp_002814	pgaptmp_002814	protein_coding	protein_coding	pgaptmp_002814	0.4947	1413		GO:0016491		TRUE	2.67965	9.01661e-09	5.95854e-07	Chromosome_I	3056582	3057994	1413	+	9.10886	548.126	462.941	562.796	258.165	270.361	303.478	284.361	359.716	342.027	782.985	682.11	687.311	1754.24	1567.23	1563.82	947.215	1185.04	1078.24	257.053	278.438	252.558	15.9844	13.5402	16.6246	9.84283	9.8934	10.5128	9.5821	11.0625
pgaptmp_004424	pgaptmp_004424	pgaptmp_004424	protein_coding	protein_coding	pgaptmp_004424	0.4641	849	GO:0015724	GO:0015499	GO:0005886	TRUE	-4.59184	9.05725e-09	5.95854e-07	Chromosome_II	1294128	1294976	849	-	10.7855	4433.58	6311.32	7308.19	8491.91	9365.68	12266.1	11157.6	11027.3	9630.25	274.448	366.453	298.267	251.868	156.501	187.078	291.58	227.688	293.704	5143.29	6121.17	4560.99	215.181	307.223	359.288	538.842	570.395	707.184	625.745	564.415
pgaptmp_004064	pgaptmp_004064	pgaptmp_004064	protein_coding	protein_coding	pgaptmp_004064	0.4292	480		GO:0008199,GO:0016491		TRUE	-3.22474	9.36616e-09	6.08569e-07	Chromosome_II	853845	854324	480	+	10.3008	6644.58	7422.03	9069.27	3074.28	2228.43	3142.81	10862.2	7707.76	8546.46	284.538	272.118	224.164	197.37	166.49	155.46	365.74	342.197	288.412	1902.19	1871.33	1602.58	570.407	639.032	788.628	345.038	240.05	320.487	1077.48	697.79
pgaptmp_003486	pgaptmp_003486	pgaptmp_003486	protein_coding	protein_coding	pgaptmp_003486	0.4272	405	GO:0006355	GO:0003700,GO:0043565		TRUE	-2.63466	9.64095e-09	6.16973e-07	Chromosome_II	232698	233102	405	-	7.43029	349.999	346.766	369.208	391.412	320.2	345.536	629.604	472.407	514.448	62.5581	36.2824	68.5459	50.0791	52.167	51.3807	84.2718	46.6027	55.5655	392.285	384.206	377.175	35.6098	35.3853	38.0502	52.0647	40.8799	41.761	74.0193	50.6872
pgaptmp_003568	pgaptmp_003568	pgaptmp_003568	protein_coding	protein_coding	pgaptmp_003568	0.4731	1095				TRUE	-4.86635	9.84209e-09	6.16973e-07	Chromosome_II	320073	321167	1095	+	9.36469	4207.7	3365.57	3476.43	4102.46	4247.94	2509.47	5803.79	8683.92	8039.75	64.5761	32.6542	42.6096	76.5915	72.1459	81.6821	47.1922	69.2383	70.1184	1796.57	2772.91	3343.9	158.339	127.024	132.514	201.834	200.59	112.176	252.366	344.619
pgaptmp_003164	pgaptmp_003164	prlC	protein_coding	protein_coding	pgaptmp_003164	0.4993	2043	GO:0006508	GO:0004222		TRUE	3.99771	9.93125e-09	6.16973e-07	Chromosome_I	3429344	3431386	2043	-	12.1346	3380.5	2297.11	2146.63	1507.35	1828.35	1113.3	1394.33	2496.37	2304.11	9448.29	8481.02	9553.81	26836.5	27241.2	26833.9	10092.4	11309.8	13311.9	1480.29	1601.18	2297.94	68.1821	46.468	43.8561	39.7476	46.2738	26.6734	32.4961	53.0979
pgaptmp_002400	pgaptmp_002400	pgaptmp_002400	protein_coding	protein_coding	pgaptmp_002400	0.4963	945		GO:0001216		TRUE	2.77477	9.96441e-09	6.16973e-07	Chromosome_I	2611919	2612863	945	-	8.2649	183.48	163.702	182.153	111.466	148.835	80.8175	95.0345	105.974	108.379	744.643	707.507	805.877	936.773	981.184	1053.96	1215.2	1091.83	1177.46	156.467	127.431	155.356	8.00045	7.15918	8.04537	6.3544	8.14361	4.18607	4.78831	4.87311
pgaptmp_000688	pgaptmp_000688	pgaptmp_000688	protein_coding	protein_coding	pgaptmp_000688	0.4299	528				TRUE	-2.77128	1.01088e-08	6.17579e-07	Chromosome_I	714585	715112	528	+	10.8192	5157.47	6166.98	6252.84	5609.17	4650.75	4162.93	5355.34	5096.47	5364.05	437.907	569.634	505.757	511.101	532.769	507.22	463.495	419.424	416.742	3307.6	4133.88	3982.77	402.496	482.703	494.293	572.307	455.442	385.92	482.932	419.443
pgaptmp_001931	pgaptmp_001931	pgaptmp_001931	protein_coding	protein_coding	pgaptmp_001931	0.4534	1941				TRUE	-3.04003	1.02871e-08	6.17579e-07	Chromosome_I	2081828	2083768	1941	+	9.39462	3222.46	2890.3	2728.22	2158.85	1966.26	1128.97	2503.57	2896.38	2857.97	98.8822	154.2	124.124	163.493	175.37	146.237	131.464	133.151	203.74	1292.53	1475.66	1679.01	68.41	61.5403	58.667	59.9186	52.3793	28.4702	61.4138	64.8437
pgaptmp_000573	pgaptmp_000573	mutS	protein_coding	protein_coding	pgaptmp_000573	0.4817	2562	GO:0006298	GO:0005524,GO:0030983		TRUE	4.63129	1.03262e-08	6.17579e-07	Chromosome_I	582260	584821	2562	-	12.3214	2372.9	2044.51	1898.31	1392.68	1803.09	1085.26	1305.24	1907.54	1760.1	21986.1	18103.1	20971.3	37422.3	41703.6	40513	12780.7	14793	15280.5	1360.7	1483.94	2282.99	38.1644	32.9801	30.9264	29.2845	36.39	20.7343	24.2574	32.3543
pgaptmp_001083	pgaptmp_001083	tmk	protein_coding	protein_coding	pgaptmp_001083	0.466	633	GO:0006233	GO:0004798,GO:0005524		TRUE	4.49599	1.16381e-08	6.83238e-07	Chromosome_I	1152267	1152899	633	+	11.2698	1370.7	1147.67	1061.06	602.172	910.078	467.587	628.119	982.128	903.627	5382.02	4419.2	5146.5	19996.3	17724.6	17435.2	10491.8	12047.5	12809.2	681.19	751.846	1153.12	89.2272	74.93	69.9646	51.2485	74.3394	36.1569	47.2466	67.422
pgaptmp_001115	pgaptmp_001115	pgaptmp_001115	protein_coding	protein_coding	pgaptmp_001115	0.3833	240				TRUE	-4.89174	1.16837e-08	6.83238e-07	Chromosome_I	1186061	1186300	240	-	8.11934	912.002	1333.38	1407.4	1567.57	1249.39	1621.3	1434.43	1000.04	1097.16	68.6121	32.6542	64.8407	22.0937	34.408	27.6665	38.765	31.9561	35.7207	1474.7	1055.13	908.875	156.582	229.606	244.764	351.868	269.174	330.662	284.577	181.069
pgaptmp_004495	pgaptmp_004495	pgaptmp_004495	protein_coding	protein_coding	pgaptmp_004495	0.4348	276				TRUE	-6.48042	1.19253e-08	6.89704e-07	Chromosome_II	1369933	1370208	276	-	8.59966	1948.12	2576.1	2635.1	2762.94	2021.56	3159.31	5244.72	3378.49	3460.39	20.18	12.6989	33.3466	29.4583	19.9789	13.1745	47.1922	54.5917	34.3977	3676.41	2527.6	2022.12	290.847	385.741	398.5	539.296	378.723	560.293	904.786	531.926
pgaptmp_002391	pgaptmp_002391	pgaptmp_002391	protein_coding	protein_coding	pgaptmp_002391	0.4538	465				TRUE	3.91611	1.21405e-08	6.94516e-07	Chromosome_I	2603410	2603874	465	+	10.2188	809.469	725.216	731.064	304.289	357.75	267.193	468.491	650.772	610.159	2405.46	1970.14	2163.83	6237.79	6096.88	7073.41	3660.77	3929.27	4944.01	354.844	410.966	581.547	71.7308	64.4549	65.621	35.2531	39.7806	28.1258	47.9712	60.8153
pgaptmp_000078	pgaptmp_000078	yigB	protein_coding	protein_coding	pgaptmp_000078	0.4854	717				TRUE	2.41102	1.23918e-08	7.01035e-07	Chromosome_I	84960	85676	717	+	9.01717	398.567	346.766	372.475	235.103	264.899	220.187	208.631	231.352	218.165	712.355	896.176	861.455	1421.36	1368.55	1570.4	1253.96	1480.63	1812.49	279.964	277.801	292.435	22.9055	19.9875	21.683	17.6646	19.1032	15.0316	13.8545	14.0214
pgaptmp_001139	pgaptmp_001139	ati2	protein_coding	protein_coding	pgaptmp_001139	0.412	1488				TRUE	-2.62962	1.25209e-08	7.01035e-07	Chromosome_I	1209075	1210562	1488	-	11.3684	4661	4917.21	5230.98	2930.78	2844.25	2450.92	3285.37	3994.19	3835.49	2024.06	2869.94	2419.48	745.294	885.729	806.282	1781.51	1746.94	1624.63	5687.01	4978.11	5523.04	129.073	136.571	146.731	106.107	98.8346	80.6228	105.127	116.644
pgaptmp_003680	pgaptmp_003680	pgaptmp_003680	protein_coding	protein_coding	pgaptmp_003680	0.4752	444	GO:0008643,GO:0009401,GO:0016310	GO:0016301	GO:1902495	TRUE	-3.34398	1.30213e-08	7.21379e-07	Chromosome_II	436563	437006	444	-	8.5705	2049.88	2082.36	1739.03	893.008	747.589	952.492	1253.27	1320.2	1294.21	46.4141	145.13	68.5459	73.6457	61.0465	52.6982	106.182	133.151	201.094	653.249	797.721	814.997	190.241	193.827	163.48	108.352	87.061	105.005	134.398	129.21
pgaptmp_004068	pgaptmp_004068	yiaY	protein_coding	protein_coding	pgaptmp_004068	0.4708	1149		GO:0016491		TRUE	-6.00089	1.35397e-08	7.42284e-07	Chromosome_II	857422	858570	1149	-	10.8978	20758.6	16394.8	14059.3	21960.7	19590.9	6471.17	20079	30050.4	28516.3	121.08	107.033	85.2192	131.089	136.522	121.206	112.924	107.852	150.821	5830.63	9338.18	13128	744.453	589.696	510.722	1029.65	881.614	275.674	832.061	1136.5
pgaptmp_001902	pgaptmp_001902	pgaptmp_001902	protein_coding	protein_coding	pgaptmp_001902	0.4658	1419				TRUE	-2.87896	1.39692e-08	7.5794e-07	Chromosome_I	2044847	2046265	1419	-	8.78998	2850.1	2921.99	2651.43	1336.31	1238.47	1205.67	2472.38	2544.88	2289.33	72.6481	65.3084	77.8088	79.5373	78.8055	80.3647	101.126	81.2219	109.808	591.78	765.863	678.748	82.763	85.1016	77.99	50.7328	45.1281	41.5889	82.9595	77.933
pgaptmp_001870	pgaptmp_001870	pgaptmp_001870	protein_coding	protein_coding	pgaptmp_001870	0.4998	2811		GO:0005524,GO:0140662		TRUE	2.82593	1.42887e-08	7.58071e-07	Chromosome_I	2004075	2006885	2811	+	10.9947	1699.88	1285.85	1360.02	785.386	951.042	823.019	940.693	1382.89	1223.13	3606.17	3452.27	3523.63	6763.62	6465.38	6974.6	3758.52	4046.45	5381.92	918.125	906.675	1188.85	24.9182	18.9048	20.1942	15.0517	17.4937	14.3312	15.9338	21.3779
pgaptmp_004660	pgaptmp_004660	pgaptmp_004660	protein_coding	protein_coding	pgaptmp_004660	0.4356	264				TRUE	-3.14258	1.43199e-08	7.58071e-07	Chromosome_II	1575391	1575654	264	-	8.06012	972.905	1136.23	972.846	707.872	608.312	696.845	2300.13	1509.76	1626.39	62.5581	54.4236	68.5459	32.4041	46.6173	47.4283	69.1029	45.2712	76.7334	468.283	479.779	453.607	151.853	177.871	153.809	144.449	119.142	129.201	414.841	248.509
pgaptmp_000985	pgaptmp_000985	pgaptmp_000985	protein_coding	protein_coding	pgaptmp_000985	0.4482	2037				TRUE	-3.06972	1.44038e-08	7.58071e-07	Chromosome_I	1041601	1043637	2037	-	11.6704	12483.6	12170.3	11857.1	6700.12	6826.61	4003.77	5667.92	6513.69	6597.04	1886.83	2064.47	1848.89	720.255	896.829	915.63	721.366	745.643	739.551	6872.25	7168.66	8803.79	252.526	246.917	242.957	177.197	173.284	96.2078	132.485	138.955
pgaptmp_002962	pgaptmp_002962	cobA	protein_coding	protein_coding	pgaptmp_002962	0.4806	876	GO:0019354	GO:0004851		TRUE	2.76289	1.59386e-08	8.30541e-07	Chromosome_I	3222741	3223616	876	-	7.69605	124.119	80.0906	94.7524	77.5136	76.4657	74.2202	60.8815	84.3317	61.9308	986.804	794.585	920.738	780.644	660.412	737.774	342.143	720.345	361.176	95.5565	101.945	122.125	5.83836	3.7785	4.51468	4.76692	4.51343	4.14716	3.30913	4.18335
pgaptmp_001984	pgaptmp_001984	norR	protein_coding	protein_coding	pgaptmp_001984	0.4817	1530	GO:0006355	GO:0003700		TRUE	-4.48757	1.63772e-08	8.40489e-07	Chromosome_I	2144640	2146169	1530	+	9.82809	4486.77	3661.29	4404.35	3331.81	3771.4	2405.56	4173.35	4991.24	5327.46	137.224	121.546	150.06	119.306	134.302	151.507	168.544	101.194	136.268	2369.91	3587.83	4308.43	120.837	98.8972	120.152	117.315	127.454	76.9586	129.875	141.76
pgaptmp_003141	pgaptmp_003141	polA	protein_coding	protein_coding	pgaptmp_003141	0.4744	2793	GO:0006261	GO:0003676,GO:0003677,GO:0003887,GO:0008408		TRUE	4.10794	1.64489e-08	8.40489e-07	Chromosome_I	3402327	3405119	2793	-	13.9679	9798.43	7424.67	6708.63	4654.02	6151.39	3724.2	4441.38	7290.58	6698.38	21978.1	18814.3	22666.5	102154	90950.4	99506	88921.9	90730.1	121976	4682.83	5871.4	7516.08	144.559	109.862	100.255	89.768	113.88	65.2672	75.7146	113.43
pgaptmp_003485	pgaptmp_003485	pgaptmp_003485	protein_coding	protein_coding	pgaptmp_003485	0.4333	390				TRUE	-2.68965	1.90243e-08	9.60826e-07	Chromosome_II	232248	232637	390	-	7.32708	272.907	286.038	285.891	408.708	341.365	347.185	488.537	418.673	448.999	58.5221	59.866	46.3148	42.7145	44.3975	52.6982	69.1029	70.5698	43.6586	387.814	365.728	349.759	28.8342	30.311	30.5968	56.4564	45.2583	43.5742	59.6438	46.6496
pgaptmp_002473	pgaptmp_002473	zipA	protein_coding	protein_coding	pgaptmp_002473	0.4324	969	GO:0000917	GO:0005515	GO:0016020	TRUE	2.90402	1.91691e-08	9.60826e-07	Chromosome_I	2690376	2691344	969	-	13.6872	5280.05	6666.89	6724.97	5481.69	4794.81	7014.63	7890.09	6669.66	6560.45	39074.6	39449.9	42637.4	46816.6	42482.8	40712	26449.5	27616.8	24620.8	6572.17	5864.4	6017.35	224.529	284.342	289.673	304.758	255.854	354.335	387.696	299.101
pgaptmp_001934	pgaptmp_001934	pgaptmp_001934	protein_coding	protein_coding	pgaptmp_001934	0.398	588				TRUE	-3.50058	2.19577e-08	1.09022e-06	Chromosome_I	2085229	2085816	588	-	10.0902	4183.03	5429.44	5141.13	3317.07	2674.93	4102.73	6025.04	4267.33	4682.11	163.458	174.156	146.355	167.912	154.281	126.476	830.92	591.189	259.306	2168.74	1944.6	1551.9	293.138	381.61	364.941	303.908	235.223	341.529	487.883	315.367
pgaptmp_000492	pgaptmp_000492	pgaptmp_000492	protein_coding	protein_coding	pgaptmp_000492	0.4811	318				TRUE	3.07636	2.2397e-08	1.10164e-06	Chromosome_I	512944	513261	318	+	6.60846	411.673	357.327	460.693	17.937	21.8473	23.9154	40.8352	32.0908	30.9654	258.304	313.843	264.921	228.302	208.668	184.444	219.107	259.644	240.784	18.4407	21.0262	14.9541	53.3437	46.4388	60.4679	3.0387	3.55235	3.68115	6.1142	4.38522
pgaptmp_001140	pgaptmp_001140	ati1	protein_coding	protein_coding	pgaptmp_001140	0.4133	450				TRUE	-2.88419	2.32003e-08	1.12553e-06	Chromosome_I	1210605	1211054	450	-	9.03876	934.358	917.082	973.662	590	577.589	492.327	601.39	749.283	794.544	407.637	555.121	437.211	125.198	162.051	159.412	365.74	350.186	349.269	1176.85	1101.01	1410.67	85.5577	84.2243	90.3102	70.6324	66.3667	53.5518	63.6322	72.3554
pgaptmp_001484	pgaptmp_001484	pgaptmp_001484	protein_coding	protein_coding	pgaptmp_001484	0.4598	870	GO:0006355	GO:0003677,GO:0003700		TRUE	-3.28888	2.33232e-08	1.12553e-06	Chromosome_I	1534252	1535121	870	+	8.44052	1292.84	1394.11	1600.99	778.98	643.131	832.915	1868.77	1482.89	1531.38	54.4861	54.4236	42.6096	69.2269	54.3869	57.968	123.037	163.775	205.063	610.78	837.862	664.625	61.2326	66.2244	76.8086	48.236	38.2229	46.8613	102.275	74.0676
pgaptmp_001082	pgaptmp_001082	mltG	protein_coding	protein_coding	pgaptmp_001082	0.4405	1017	GO:0009252,GO:0071555	GO:0008932		TRUE	4.3282	2.36084e-08	1.12553e-06	Chromosome_I	1151254	1152270	1017	+	11.1412	1090.08	787.705	811.93	669.436	889.596	445.321	521.205	680.624	637.606	7208.31	5023.3	5320.64	15990	20702.5	18692	7779.97	9212.69	8763.48	801.334	800.907	1316.79	44.167	32.0099	33.3226	35.4611	45.2289	21.4331	24.4017	29.0819
pgaptmp_003416	pgaptmp_003416	pdxH	protein_coding	protein_coding	pgaptmp_003416	0.489	636	GO:0008615	GO:0004733,GO:0010181		TRUE	-2.55192	2.38236e-08	1.12553e-06	Chromosome_II	162625	163260	636	+	11.2115	3201.64	4258.01	4949.99	5591.23	3781.64	5750.41	9050.55	7655.52	6905.99	793.075	814.541	900.359	683.432	822.463	795.742	810.694	956.021	837.452	5100.82	4939.24	4430.56	207.431	276.688	324.854	473.603	307.445	442.563	677.565	523.064
pgaptmp_002169	pgaptmp_002169	pgaptmp_002169	protein_coding	protein_coding	pgaptmp_002169	0.4036	441				TRUE	-2.68702	2.39519e-08	1.12553e-06	Chromosome_I	2352114	2352554	441	-	8.00806	437.113	328.284	472.128	329.273	291.525	229.258	286.589	313.445	347.657	167.494	150.572	185.259	82.4832	77.6955	104.079	205.623	248.992	186.541	670.013	623.777	657.979	40.8426	30.7647	44.6851	40.2237	34.1808	25.4459	30.9423	30.8859
pgaptmp_000760	pgaptmp_000760	recB	protein_coding	protein_coding	pgaptmp_000760	0.4897	3639	GO:0006281,GO:0006310	GO:0005524,GO:0008854	GO:0009338	TRUE	2.95445	2.47517e-08	1.15282e-06	Chromosome_I	803065	806703	3639	+	10.8792	1564.97	1079.9	1302.85	644.452	779.677	578.093	731.32	1006.76	1016.23	3022.97	3519.4	3340.22	6343.84	6307.77	6567.51	4982.15	5419.23	7580.73	775.07	762.04	1084.17	17.7208	12.2643	14.9435	9.54054	11.0784	7.77586	9.56882	12.0221
pgaptmp_000168	pgaptmp_000168	adhP	protein_coding	protein_coding	pgaptmp_000168	0.4523	1017				TRUE	-3.73398	2.6771e-08	1.224e-06	Chromosome_I	177729	178745	1017	-	9.99771	3762.1	3791.54	4838.91	2675.82	2268.03	1931.37	4299.57	4724.07	4318.27	153.368	204.996	194.522	268.07	206.448	208.158	205.623	183.748	228.877	2520.79	3875.19	3591.47	152.429	154.077	198.594	141.743	115.311	92.9562	201.297	201.852
pgaptmp_002306	pgaptmp_002306	pgaptmp_002306	protein_coding	protein_coding	pgaptmp_002306	0.4299	1998				TRUE	-2.55109	2.68067e-08	1.224e-06	Chromosome_I	2508486	2510483	1998	-	9.11607	1398.45	1681.9	1697.37	1191.53	1060.96	1030.84	1538.37	1269.45	1366.7	131.17	197.739	161.175	160.548	129.863	154.142	369.11	312.904	207.709	1017.03	963.382	913.029	28.841	34.7894	35.4587	32.1273	27.4567	25.2538	36.6605	27.6095
pgaptmp_002695	pgaptmp_002695	iscR	protein_coding	protein_coding	pgaptmp_002695	0.4892	507				TRUE	3.30021	2.71343e-08	1.224e-06	Chromosome_I	2918019	2918525	507	-	12.2799	3766.73	2663.23	2466.01	1565.65	2164.25	1322.77	1141.9	1895.6	1801.62	12654.9	13696.6	13157.1	21657.7	24046.8	24421.6	11636.2	13699.9	13785.5	2191.09	2210.3	3165.28	306.136	217.092	203.015	166.36	220.721	127.705	107.239	162.471
pgaptmp_002128	pgaptmp_002128	nikA	protein_coding	protein_coding	pgaptmp_002128	0.4707	1587	GO:0015675	GO:0015413,GO:0016151	GO:0009897,GO:0030288,GO:0055052	TRUE	-2.7276	2.72142e-08	1.224e-06	Chromosome_I	2312990	2314576	1587	-	8.29237	373.127	434.778	504.801	965.397	826.785	541.807	729.093	715.7	633.384	94.8462	137.873	125.976	88.3748	98.7843	106.714	158.431	142.471	148.175	824.804	733.368	659.64	9.68808	11.3222	13.2765	32.7713	26.9377	16.7109	21.8745	19.5971
pgaptmp_003222	pgaptmp_003222	trkA	protein_coding	protein_coding	pgaptmp_003222	0.5134	1377	GO:0006813	GO:0015079	GO:0016020	TRUE	2.20874	2.74429e-08	1.224e-06	Chromosome_I	3489500	3490876	1377	+	11.2097	1664.42	1650.22	1788.86	1050.6	1196.82	1076.19	1404.73	1542.6	1435.67	3194.5	3786.07	3951.58	5311.33	5034.67	5576.78	6613.65	6210.14	6687.71	1152.83	1176.19	1315.96	49.8067	49.5278	54.223	41.1024	44.9408	38.2551	48.5726	48.6806
pgaptmp_003732	pgaptmp_003732	pgaptmp_003732	protein_coding	protein_coding	pgaptmp_003732	0.4703	1971	GO:0034755	GO:0005381	GO:0033573	TRUE	-2.58761	2.77903e-08	1.22908e-06	Chromosome_II	489586	491556	1971	+	8.37113	410.902	400.453	468.861	876.993	792.649	579.742	784.035	927.648	851.549	129.152	230.393	137.092	106.05	113.214	100.126	148.318	105.189	136.268	633.132	733.368	814.166	8.59033	8.39666	9.92884	23.9703	20.794	14.3973	18.9401	20.4519
pgaptmp_003384	pgaptmp_003384	pgaptmp_003384	protein_coding	protein_coding	pgaptmp_003384	0.4646	198				TRUE	-3.06583	2.84605e-08	1.24823e-06	Chromosome_II	120754	120951	198	-	8.14408	296.034	422.456	339.802	805.886	641.766	1114.13	1432.94	681.37	885.329	32.2881	67.1225	27.7889	64.8082	63.2664	69.8251	293.266	197.063	459.077	516.899	683.033	761.827	61.6077	88.1775	71.631	219.267	167.593	275.424	344.585	149.539
pgaptmp_003158	pgaptmp_003158	uspA	protein_coding	protein_coding	pgaptmp_003158	0.4624	426				TRUE	-3.06114	2.90286e-08	1.25025e-06	Chromosome_I	3422151	3422576	426	+	11.0831	7052.4	9130.33	10861.4	4912.83	4208.34	6519.01	12060.5	9277.97	8502.12	290.593	370.081	257.51	512.574	405.127	450.569	775.3	814.882	1139.09	4659.92	4189.31	3465.19	682.159	885.765	1064.18	621.278	510.794	749.039	1347.99	946.414
pgaptmp_002609	pgaptmp_002609	pgaptmp_002609	protein_coding	protein_coding	pgaptmp_002609	0.4556	1251	GO:0006561	GO:0004350,GO:0016620		TRUE	2.36459	2.90785e-08	1.25025e-06	Chromosome_I	2816937	2818187	1251	-	11.9169	2854.73	2767.97	2677.57	2160.13	2384.09	1965.19	2066.26	2589.65	2317.48	5149.95	5036	5422.53	11465.2	10605.4	10519.9	6972.65	7791.97	7416.68	2068.16	2216.03	2432.53	94.0298	91.4419	89.3356	93.0223	98.5393	76.8916	78.643	89.9543
pgaptmp_004505	pgaptmp_004505	pgaptmp_004505	protein_coding	protein_coding	pgaptmp_004505	0.4688	192				TRUE	-2.71668	2.92193e-08	1.25025e-06	Chromosome_II	1382109	1382300	192	-	8.94937	988.323	1368.58	1329.8	1586.79	1589.39	1800.25	1752.94	1512.75	1270.29	171.53	268.49	250.1	104.577	103.224	118.571	129.779	141.14	89.9633	901.92	814.924	707.826	212.107	294.585	289.085	445.227	428.03	458.949	434.709	342.375
pgaptmp_001248	pgaptmp_001248	pgaptmp_001248	protein_coding	protein_coding	pgaptmp_001248	0.4848	231				TRUE	-3.57429	2.96538e-08	1.25861e-06	Chromosome_I	1334311	1334541	231	-	9.2326	2517.83	2754.77	3305.71	1764.88	1544.33	1513.27	2075.17	2162.77	2154.91	143.278	177.784	138.944	106.05	87.685	134.38	129.779	129.156	100.547	1196.41	1666.17	1575.16	449.131	492.85	597.302	411.592	345.679	320.654	427.734	406.852
pgaptmp_000497	pgaptmp_000497	pgaptmp_000497	protein_coding	protein_coding	pgaptmp_000497	0.485	831				TRUE	3.73538	3.00103e-08	1.2618e-06	Chromosome_I	515254	516084	831	+	10.6803	5281.59	4084.62	5583.86	366.428	407.589	318.322	520.463	544.051	578.49	5369.91	7078.7	6150.6	4440.83	3862.58	5192.09	3156.82	3686.94	3475.49	446.489	303.924	299.081	261.892	203.139	280.462	23.7548	25.361	18.7499	29.8209	28.4496
pgaptmp_000083	pgaptmp_000083	pgaptmp_000083	protein_coding	protein_coding	pgaptmp_000083	0.463	825		GO:0016787		TRUE	-2.5621	3.02085e-08	1.2618e-06	Chromosome_I	91140	91964	825	-	12.1849	8551.08	9044.08	9925.31	7862.19	7679.34	5593.73	10292.7	10487.7	10326.3	1009	1220.9	1094.88	1717.42	1889.11	1948.51	2209.61	2422.01	5121.29	10183.8	12679.4	12159.3	427.095	453.056	502.147	513.398	481.298	331.879	594.029	552.414
pgaptmp_000482	pgaptmp_000482	hemW	protein_coding	protein_coding	pgaptmp_000482	0.4902	1173	GO:0006779	GO:0051539,GO:0051989	GO:0005737	TRUE	2.14483	3.04553e-08	1.2621e-06	Chromosome_I	505413	506585	1173	-	10.0775	856.495	758.661	801.311	441.379	549.597	467.587	521.947	562.709	520.078	1943.34	2089.87	2299.07	2685.12	2717.12	3007.75	1958.48	1933.35	2391.96	632.014	659.458	711.149	30.0874	26.7295	28.5131	20.2711	24.2265	19.5118	21.1866	20.846
pgaptmp_001817	pgaptmp_001817	pgaptmp_001817	protein_coding	protein_coding	pgaptmp_001817	0.4156	450		GO:0008080		TRUE	-4.64005	3.13428e-08	1.28873e-06	Chromosome_I	1946679	1947128	450	+	10.7301	5929.94	8977.19	10575.5	4464.4	4687.62	8461.92	7914.59	6339.8	5863.72	361.223	604.102	440.917	226.829	154.281	173.904	358.998	315.567	275.182	6495.05	5071.14	3715.25	542.995	824.46	980.911	534.46	538.622	920.427	837.431	612.21
pgaptmp_002804	pgaptmp_002804	pgaptmp_002804	protein_coding	protein_coding	pgaptmp_002804	0.4167	408				TRUE	-3.3416	3.20045e-08	1.30573e-06	Chromosome_I	3037697	3038104	408	-	11.0649	4007.26	5042.19	5302.87	6208.14	4736.09	4707.21	7453.53	5544.25	6620.97	744.643	700.251	703.985	391.795	574.947	548.061	835.976	637.791	537.134	6305.06	5292.87	4963.09	404.711	510.741	542.49	819.72	600.211	564.724	869.83	590.5
pgaptmp_002066	pgaptmp_002066	pgaptmp_002066	protein_coding	protein_coding	pgaptmp_002066	0.486	1356				TRUE	2.64033	3.25635e-08	1.31832e-06	Chromosome_I	2230389	2231744	1356	-	10.9375	1691.4	1361.54	1533.19	906.461	1077.35	707.566	943.663	1188.85	1109.83	3361.99	3352.5	3729.27	6152.36	5799.42	5931.18	3375.93	3670.96	4070.84	920.36	898.392	1217.09	51.398	41.4966	47.193	36.0125	41.0809	25.5411	33.1352	38.0983
pgaptmp_002672	pgaptmp_002672	pgaptmp_002672	protein_coding	protein_coding	pgaptmp_002672	0.4587	1524			GO:0016020	TRUE	-2.46071	3.36801e-08	1.35312e-06	Chromosome_I	2893073	2894596	1524	-	11.5118	15318.2	20098.3	22140.2	17869.1	16066	21691.3	29606.2	28362.3	25291	484.321	513.396	509.463	391.795	341.86	345.173	487.091	532.602	433.94	2119.57	2341.55	1967.29	414.173	545.026	606.37	631.659	545.088	696.679	924.977	808.712
pgaptmp_004032	pgaptmp_004032	pgaptmp_004032	protein_coding	protein_coding	pgaptmp_004032	0.4345	603				TRUE	-3.33785	3.41775e-08	1.3627e-06	Chromosome_II	802504	803106	603	+	9.81973	1315.19	1853.53	2026.56	2688.63	2428.47	3355.58	3484.35	2996.39	2803.07	199.782	210.438	248.247	200.316	152.061	175.221	473.607	376.816	494.798	2258.15	2052.28	1582.64	89.8733	127.035	140.276	240.203	208.238	272.385	275.13	215.932
pgaptmp_004023	pgaptmp_004023	pgaptmp_004023	protein_coding	protein_coding	pgaptmp_004023	0.4629	633	GO:0000160			TRUE	-2.13868	3.56999e-08	1.4127e-06	Chromosome_II	791447	792079	633	+	10.215	1749.22	2106.12	1904.85	3101.19	3228.63	2582.04	2991.36	2727.72	2833.34	472.213	598.66	565.04	491.953	517.23	487.458	288.209	387.468	298.996	2516.32	2287.39	2295.45	113.868	137.506	125.602	263.93	263.729	199.66	225.008	187.255
pgaptmp_004337	pgaptmp_004337	fabV	protein_coding	protein_coding	pgaptmp_004337	0.4633	1200	GO:0006633	GO:0004318		TRUE	-3.4514	3.64385e-08	1.43116e-06	Chromosome_II	1195697	1196896	1200	-	11.293	6705.49	7238.08	7647.99	9606.57	9326.77	6061.31	10685.4	12711.7	11944.9	530.735	504.326	465	559.707	576.057	578.362	532.598	430.076	482.891	4878.97	7937.71	7407.25	230.254	249.278	266.015	431.272	401.878	247.24	423.979	460.32
pgaptmp_004349	pgaptmp_004349	pgaptmp_004349	protein_coding	protein_coding	pgaptmp_004349	0.4246	2082	GO:0055085	GO:0022857	GO:0019867	TRUE	-2.49653	3.8358e-08	1.4802e-06	Chromosome_II	1212069	1214150	2082	-	10.5129	1024.56	1211.04	1320	4805.85	3970.07	3678.02	2001.66	1878.43	1848.07	938.372	1195.51	779.941	530.249	632.664	501.95	921.933	849.501	801.731	3631.71	3148.19	3343.9	20.2774	24.0392	26.4627	124.352	98.5965	86.4702	45.7766	39.206
pgaptmp_004377	pgaptmp_004377	modA	protein_coding	protein_coding	pgaptmp_004377	0.4303	753	GO:0015689			TRUE	-2.29745	3.85444e-08	1.4802e-06	Chromosome_II	1241733	1242485	753	-	9.99385	1813.98	1939.78	2090.27	2470.83	2447.58	1707.89	2838.41	3076.99	3093.02	377.367	402.735	420.538	380.012	436.205	383.379	237.646	259.644	296.35	1918.4	2209.02	2256.4	99.265	106.463	115.864	176.771	168.069	111.019	179.479	177.569
pgaptmp_004892	pgaptmp_004892	pgaptmp_004892	protein_coding	protein_coding	pgaptmp_004892	0.4308	1344				TRUE	-2.62058	3.8608e-08	1.4802e-06	Chromosome_II	1828406	1829749	1344	+	9.30833	768.61	789.465	853.588	1302.36	1189.31	773.539	590.254	644.055	649.57	371.313	520.653	333.466	243.031	306.342	274.03	358.998	394.126	381.021	1799.93	1619.02	2118.49	23.5649	24.2759	26.5088	52.203	45.7553	28.1719	20.9109	20.8239
pgaptmp_003237	pgaptmp_003237	ilvM	protein_coding	protein_coding	pgaptmp_003237	0.4491	285				TRUE	3.53844	3.88121e-08	1.4802e-06	Chromosome_I	3505491	3505775	285	+	7.75823	203.524	95.9327	157.648	83.9197	71.0039	74.2202	89.8373	139.558	113.305	518.627	404.549	348.287	895.532	1501.74	1201.52	293.266	383.474	361.176	108.409	90.4763	106.34	29.4258	13.9112	23.088	15.8629	12.8819	12.7471	15.0088	21.2788
pgaptmp_002122	pgaptmp_002122	pgaptmp_002122	protein_coding	protein_coding	pgaptmp_002122	0.4961	762		GO:0005524		TRUE	2.64855	3.93624e-08	1.49039e-06	Chromosome_I	2307296	2308057	762	-	7.14789	130.286	110.895	117.624	89.0446	90.1203	78.3435	64.5938	73.8835	62.6346	361.223	252.163	276.036	415.362	516.12	465.061	139.891	167.77	190.51	81.5863	64.3529	68.1241	7.04532	6.01447	6.44289	6.29531	6.11521	5.03247	4.03616	4.21337
pgaptmp_002860	pgaptmp_002860	parC	protein_coding	protein_coding	pgaptmp_002860	0.4792	2289	GO:0006265	GO:0003918	GO:0009340	TRUE	3.22359	4.03298e-08	1.51611e-06	Chromosome_I	3107377	3109665	2289	-	12.5046	4875.32	3504.63	3091.7	1858.41	2549.99	1634.49	1985.33	3285.95	3080.36	9753.01	12029.4	12303.1	23930.4	19611.5	21363.8	16185.2	16056.6	25196.3	2120.13	2196.92	3071.4	87.7637	63.2758	56.3759	43.738	57.602	34.9518	41.2971	62.381
pgaptmp_000686	pgaptmp_000686	pgaptmp_000686	protein_coding	protein_coding	pgaptmp_000686	0.4921	1014				TRUE	-2.47353	4.13372e-08	1.54296e-06	Chromosome_I	711116	712129	1014	-	9.49037	2054.51	2117.56	2106.61	2060.84	2353.37	1175.98	1315.63	1738.13	1622.17	173.548	186.855	222.311	206.208	180.92	181.809	392.706	390.131	420.711	1009.21	1175.56	1300.17	83.4888	86.3057	86.7134	109.489	120.004	56.7667	61.7775	74.4871
pgaptmp_001639	pgaptmp_001639	pgaptmp_001639	protein_coding	protein_coding	pgaptmp_001639	0.4118	561				TRUE	-3.63864	4.19018e-08	1.55302e-06	Chromosome_I	1714842	1715402	561	+	11.016	6596.79	9666.32	10281.4	4846.84	4750.43	8892.4	10744.1	7907.03	7038.3	758.769	674.853	585.419	371.174	258.615	287.205	547.767	500.646	342.654	5023.7	3979.05	3413.68	484.538	712.099	764.949	465.437	437.839	775.87	911.885	612.474
pgaptmp_004086	pgaptmp_004086	pgaptmp_004086	protein_coding	protein_coding	pgaptmp_004086	0.4694	20780				TRUE	2.26725	4.26374e-08	1.56923e-06	Chromosome_II	872625	893399	20775	+	12.1504	3049	2793.49	2617.13	3339.49	3765.94	2997.67	3674.42	4541.22	4305.6	3206.61	3149.32	3099.38	11727.3	11159.3	10219.5	11712.1	12465.6	12127.8	2396.74	2316.7	2587.88	6.04603	5.55576	5.25678	8.65763	9.37068	7.06108	8.4193	9.49652
pgaptmp_001650	pgaptmp_001650	pgaptmp_001650	protein_coding	protein_coding	pgaptmp_001650	0.4397	1542	GO:0009966	GO:0009975		TRUE	-2.3406	4.29896e-08	1.57111e-06	Chromosome_I	1725280	1726821	1542	+	8.59367	968.279	1233.92	1082.3	793.073	599.436	741.377	1178.28	637.338	958.52	139.242	108.847	144.502	113.414	120.983	144.92	153.375	181.085	133.622	687.895	725.085	738.565	25.8746	33.0709	29.2957	27.7072	20.1003	23.5336	36.3829	17.9607
pgaptmp_005275	pgaptmp_005275	pgaptmp_005275	protein_coding	protein_coding	pgaptmp_005275	0.4041	1611				TRUE	-2.42392	4.32853e-08	1.57111e-06	Chromosome_II	2258898	2260508	1611	+	8.45497	538.104	705.854	693.489	914.789	772.167	800.753	1047.61	858.243	954.298	127.134	175.97	135.239	92.7936	107.664	96.1741	180.342	133.151	132.299	663.866	544.132	603.978	13.7635	18.1076	17.9674	30.5907	24.7833	24.3297	30.9625	23.15
pgaptmp_001996	pgaptmp_001996	vmeI	protein_coding	protein_coding	pgaptmp_001996	0.4553	3108				TRUE	2.35838	4.44191e-08	1.59451e-06	Chromosome_I	2160824	2163931	3108	-	11.2309	2776.09	2326.15	2420.27	1134.52	1357.95	1432.45	1508.67	1870.22	1705.21	3035.08	2975.16	3134.58	6685.56	5723.94	5564.93	3070.86	4142.31	4113.17	1136.06	1243.73	1331.74	36.8054	30.9313	32.503	19.665	22.5916	22.5596	23.1125	26.1487
pgaptmp_002129	pgaptmp_002129	pgaptmp_002129	protein_coding	protein_coding	pgaptmp_002129	0.4655	333				TRUE	-4.0982	4.48215e-08	1.59451e-06	Chromosome_I	2314858	2315190	333	-	7.07487	214.317	266.675	269.554	500.956	345.461	294.407	507.841	286.578	331.471	34.3061	36.2824	31.494	22.0937	32.1882	23.7142	40.4505	46.6027	37.0437	735.953	435.178	695.364	26.5198	33.0964	33.7865	81.0437	53.6412	43.2749	72.6133	37.397
pgaptmp_002630	pgaptmp_002630	dnaJ	protein_coding	protein_coding	pgaptmp_002630	0.4778	1149	GO:0006457,GO:0009408	GO:0005515,GO:0005524		TRUE	2.95859	4.48391e-08	1.59451e-06	Chromosome_I	2844134	2845282	1149	-	12.8568	4098.23	3939.4	3375.96	3525.91	4104.57	3143.64	2868.11	3280.73	3359.04	16929	14638.1	17975.7	31432	29794	29351.6	13362.1	13745.1	15658.9	3336.66	4214.8	4842.63	146.972	141.694	122.636	165.316	184.71	133.92	118.853	124.076
pgaptmp_004426	pgaptmp_004426	nirB	protein_coding	protein_coding	pgaptmp_004426	0.4784	2565	GO:0042128	GO:0008942,GO:0050660,GO:0050661		TRUE	-3.80631	4.54717e-08	1.59909e-06	Chromosome_II	1295497	1298061	2565	-	10.6656	5754.17	4858.25	3825.22	6794.29	8337.49	3606.28	4602.49	8554.81	7365.55	357.187	417.248	450.18	297.529	321.882	277.983	301.693	266.301	322.809	3536.15	3971.4	6254.95	92.4386	78.2769	62.2458	142.699	168.071	68.8184	85.4355	144.931
pgaptmp_003663	pgaptmp_003663	pgaptmp_003663	protein_coding	protein_coding	pgaptmp_003663	0.4481	183				TRUE	-3.8839	4.55753e-08	1.59909e-06	Chromosome_II	423274	423456	183	-	11.0119	2234.13	3384.05	2611.41	5375.99	4150.31	5648.16	9591.81	4563.61	6036.85	984.786	977.812	942.969	287.218	477.273	393.919	1011.26	713.687	755.427	6037.94	5017.61	7567.59	503.056	764.236	595.614	1582.6	1172.66	1510.74	2495.64	1083.66
pgaptmp_003679	pgaptmp_003679	pgaptmp_003679	protein_coding	protein_coding	pgaptmp_003679	0.441	288				TRUE	-2.90408	4.74582e-08	1.65412e-06	Chromosome_II	436217	436504	288	-	8.73428	2036.01	1841.2	1650.82	916.07	847.267	767.766	1035.73	1417.22	1247.06	98.8822	139.687	120.418	94.2665	79.9154	72.46	138.206	141.14	355.884	584.515	765.226	786.75	291.303	264.211	239.247	171.356	152.115	130.488	171.232	213.837
pgaptmp_003150	pgaptmp_003150	ubiE	protein_coding	protein_coding	pgaptmp_003150	0.4833	780		GO:0008168		TRUE	2.49841	4.89177e-08	1.69378e-06	Chromosome_I	3412755	3413534	780	-	11.7138	2856.27	2410.64	2387.6	1476.6	1633.09	1264.22	1332.71	1626.18	1685.5	5852.21	5955.76	5991.28	9784.57	10597.7	11301.1	5990.04	7154.18	7600.57	1799.37	1821.63	2329.51	150.891	127.726	127.764	101.984	108.258	79.3341	81.3531	90.5967
pgaptmp_001997	pgaptmp_001997	pgaptmp_001997	protein_coding	protein_coding	pgaptmp_001997	0.454	1086	GO:0055085	GO:0022857,GO:0042802	GO:0016020	TRUE	2.63809	4.93635e-08	1.69804e-06	Chromosome_I	2163928	2165013	1086	-	9.3953	1051.54	774.503	700.841	294.68	384.377	277.089	357.864	606.74	536.969	940.39	930.644	1004.1	2007.58	2094.45	1752.21	659.005	834.854	941.968	276.052	321.127	383.821	39.8982	29.4737	26.9358	14.6179	18.3008	12.4888	15.6899	24.2779
pgaptmp_002961	pgaptmp_002961	cysD	protein_coding	protein_coding	pgaptmp_002961	0.4719	909	GO:0000103	GO:0004781		TRUE	3.14698	5.07381e-08	1.73399e-06	Chromosome_I	3221774	3222682	909	-	7.73391	118.722	93.2924	90.6682	93.5289	110.602	79.9929	89.8373	126.124	114.009	916.174	640.385	733.626	910.261	637.103	687.711	397.763	543.254	316.194	72.0865	75.8217	98.0322	5.38178	4.24154	4.16325	5.54301	6.29135	4.30745	4.70572	6.02938
pgaptmp_000401	pgaptmp_000401	rapA	protein_coding	protein_coding	pgaptmp_000401	0.4918	2910	GO:0006355	GO:0005524,GO:0016817,GO:0140658		TRUE	3.10511	5.14426e-08	1.74672e-06	Chromosome_I	437772	440681	2910	+	11.7514	2655.83	1994.34	2000.42	1062.13	1400.96	1109.18	1057.26	1626.18	1542.64	8485.7	8680.57	9868.75	15729.2	14847.6	15046.6	5929.36	7140.87	6125.44	1741.25	1507.51	2385.17	37.6067	28.3236	28.6925	19.6629	24.893	18.657	17.299	24.2836
pgaptmp_004645	pgaptmp_004645	pgaptmp_004645	protein_coding	protein_coding	pgaptmp_004645	0.3618	1125				TRUE	-3.56553	5.58702e-08	1.8849e-06	Chromosome_II	1555266	1556390	1125	-	9.90831	2983.47	3112.09	3287.74	4232.5	4003.53	2690.89	3762.77	4009.86	4418.91	177.584	183.226	87.0718	181.168	203.118	113.301	399.448	295.594	301.642	2160.92	2236.42	2173.32	109.277	114.325	121.979	202.679	184.007	117.078	159.253	154.887
pgaptmp_002121	pgaptmp_002121	pgaptmp_002121	protein_coding	protein_coding	pgaptmp_002121	0.4912	849				TRUE	3.27994	5.80987e-08	1.9476e-06	Chromosome_I	2306427	2307275	849	-	6.82014	97.1363	65.1286	88.2177	66.6233	74.4175	40.4088	40.0927	45.5242	56.3008	272.43	203.182	218.606	459.549	602.695	525.664	136.52	174.427	175.958	47.4989	38.2294	65.6317	4.71446	3.17034	4.337	4.22749	4.53222	2.3297	2.24849	2.33009
pgaptmp_000077	pgaptmp_000077	xerC	protein_coding	protein_coding	pgaptmp_000077	0.5117	942	GO:0006310,GO:0007059,GO:0015074,GO:0051301	GO:0003677		TRUE	2.35754	5.84801e-08	1.94798e-06	Chromosome_I	84006	84947	942	+	10.3525	1033.81	863.395	855.222	591.922	656.786	606.956	589.511	798.539	753.726	1515.52	1663.55	1791.46	4196.33	3520.72	3682.28	2811.31	3162.33	4135.66	729.247	719.351	900.567	45.2217	37.8791	37.8939	33.8515	36.0509	31.5384	29.7971	36.8369
pgaptmp_001012	pgaptmp_001012	adhE	protein_coding	protein_coding	pgaptmp_001012	0.4543	2703	GO:0006066,GO:0015976	GO:0004022,GO:0016620,GO:0046872		TRUE	-4.03444	6.08664e-08	2.01472e-06	Chromosome_I	1072584	1075286	2703	+	15.29	212463	206312	145663	151921	185899	59771.2	128739	248335	213228	7414.14	8539.07	7603.03	6578.03	6745.08	6167	7090.63	6939.81	7115.04	82781.6	106374	152222	3238.89	3154.42	2249.28	3027.86	3556.11	1082.38	2267.76	3992.36
pgaptmp_002651	pgaptmp_002651	pgaptmp_002651	protein_coding	protein_coding	pgaptmp_002651	0.4687	894	GO:0006355	GO:0003700		TRUE	-2.25344	6.19937e-08	2.03921e-06	Chromosome_I	2868822	2869715	894	+	9.65725	1733.03	2253.1	2611.41	1455.46	1437.83	1627.07	2520.64	2411.29	2232.33	238.124	239.464	259.363	279.854	276.374	283.253	273.041	294.263	291.058	1465.76	1594.17	1291.03	79.8781	104.156	121.921	87.7057	83.1598	89.0844	134.248	117.206
pgaptmp_002420	pgaptmp_002420	pgaptmp_002420	protein_coding	protein_coding	pgaptmp_002420	0.4386	228				TRUE	-2.45736	6.3158e-08	2.0646e-06	Chromosome_I	2631524	2631751	228	-	10.0235	1440.08	1654.62	1635.3	2194.08	1814.01	1691.4	1983.1	1697.08	1842.44	770.877	821.797	765.12	368.228	380.708	339.903	380.908	435.402	366.468	2007.8	1900.64	2588.72	260.262	299.92	299.366	518.421	411.386	363.114	414.136	323.449
pgaptmp_003651	pgaptmp_003651	pgaptmp_003651	protein_coding	protein_coding	pgaptmp_003651	0.4517	1014				TRUE	-2.13136	6.42345e-08	2.08683e-06	Chromosome_II	408387	409400	1014	-	10.8208	2375.21	2978.32	2875.24	3263.9	3264.13	2376.69	4448.06	4369.57	4276.04	748.679	985.068	980.021	718.782	870.19	826.044	672.489	683.063	632.389	3994.38	3619.05	3728.55	96.5212	121.388	118.353	173.406	166.446	114.728	208.865	187.257
pgaptmp_005157	pgaptmp_005157	pgaptmp_005157	protein_coding	protein_coding	pgaptmp_005157	0.4246	471				TRUE	-2.28553	6.50211e-08	2.09942e-06	Chromosome_II	2123963	2124433	471	-	7.64085	309.911	345.006	326.732	452.27	398.031	295.231	647.423	627.636	654.496	90.8102	76.1931	101.893	69.2269	85.4651	69.8251	47.1922	54.5917	60.8575	413.52	434.541	422.868	27.1128	30.2724	28.9542	51.7298	43.6958	30.6813	65.4485	57.9062
pgaptmp_005007	pgaptmp_005007	pgaptmp_005007	protein_coding	protein_coding	pgaptmp_005007	0.4706	1005				TRUE	2.32688	6.68163e-08	2.14028e-06	Chromosome_II	1959985	1960989	1005	+	8.39125	198.127	151.38	162.549	183.855	200.04	167.408	204.918	261.951	234.352	676.031	607.731	648.407	877.857	1145.45	1069.77	443.27	466.027	489.506	213.465	196.244	225.142	8.12337	6.22507	6.75088	9.85537	10.2919	8.15346	9.70839	11.3264
pgaptmp_002389	pgaptmp_002389	pgaptmp_002389	protein_coding	protein_coding	pgaptmp_002389	0.4477	612				TRUE	2.39826	6.70999e-08	2.14028e-06	Chromosome_I	2601597	2602208	612	+	10.5942	997.574	1108.07	1088.84	810.37	910.078	717.462	894.661	710.476	870.551	2815.11	2265.84	2378.73	4844.41	6191.22	6064.24	1732.63	1732.29	2139.27	1242.24	1050.67	1133.19	67.1664	74.8266	74.2595	71.3339	76.8902	57.3826	69.6049	50.447
pgaptmp_004610	pgaptmp_004610	pgaptmp_004610	protein_coding	protein_coding	pgaptmp_004610	0.4704	3378				TRUE	2.86759	6.75781e-08	2.14255e-06	Chromosome_II	1507690	1511067	3378	-	11.2473	1958.91	1471.56	1686.76	1155.02	1514.29	1164.43	1558.42	1990.38	1881.15	3456.84	3956.6	2908.57	7221.7	7102.48	5479.29	6182.18	6686.82	5471.88	837.098	894.569	1140.66	23.8954	18.0036	20.8417	18.4201	23.179	16.8728	21.9663	25.6043
pgaptmp_003173	pgaptmp_003173	pgaptmp_003173	protein_coding	protein_coding	pgaptmp_003173	0.497	330		GO:0022857	GO:0016020	TRUE	2.48061	6.93112e-08	2.18434e-06	Chromosome_I	3440405	3440734	330	-	8.13107	202.753	211.228	164.183	69.1857	88.0721	91.5382	73.5033	76.8687	73.191	492.393	538.794	639.144	854.29	628.224	687.711	2042.75	2323.48	2077.09	130.762	131.892	128.771	25.3169	26.4533	20.7661	11.2945	13.7997	13.5775	10.6054	10.1222
pgaptmp_002296	pgaptmp_002296	pgaptmp_002296	protein_coding	protein_coding	pgaptmp_002296	0.4711	1161				TRUE	2.87317	7.1415e-08	2.22476e-06	Chromosome_I	2494385	2495545	1161	+	11.9732	3288.76	3741.38	3271.41	2773.84	2449.63	1552.85	2482.03	2523.98	2801.67	5069.22	3223.69	3443.97	13760	20117.6	18284.9	4640	4971.84	6282.87	2308.44	2469.62	2774.81	116.723	133.181	117.61	128.71	109.097	65.4682	101.791	94.4694
pgaptmp_001751	pgaptmp_001751	pgaptmp_001751	protein_coding	protein_coding	pgaptmp_001751	0.4237	963	GO:0009966	GO:0009975		TRUE	-2.25602	7.14392e-08	2.22476e-06	Chromosome_I	1847518	1848480	963	-	9.78314	1778.52	2389.52	2223.41	1875.06	2004.49	2408.86	2205.84	1914.25	1976.86	359.205	335.612	294.562	273.962	247.516	246.364	448.326	367.496	414.096	1450.11	1348.22	1197.16	76.101	102.548	96.3685	104.895	107.627	122.438	109.064	86.3795
pgaptmp_002390	pgaptmp_002390	pgaptmp_002390	protein_coding	protein_coding	pgaptmp_002390	0.4891	1188				TRUE	2.7061	7.22832e-08	2.23287e-06	Chromosome_I	2602230	2603417	1188	+	11.2246	1518.72	1791.92	1788.86	1192.17	1285.58	1081.97	1339.39	1152.28	1266.06	4080.4	3058.61	3345.78	7815.28	10037.2	10614.7	2920.86	3568.44	4380.42	1740.13	1392.19	1478.79	52.6767	62.3366	62.8493	54.0614	55.9534	44.5789	53.6815	42.1483
pgaptmp_004896	pgaptmp_004896	pgaptmp_004896	protein_coding	protein_coding	pgaptmp_004896	0.432	1176				TRUE	-2.1637	7.25483e-08	2.23287e-06	Chromosome_II	1831287	1832462	1176	+	8.14478	296.805	328.284	295.693	581.032	464.939	322.445	290.301	292.549	288.541	244.178	214.066	201.932	117.833	133.192	148.872	210.679	178.422	168.02	673.925	628.874	697.026	10.3997	11.5368	10.4948	26.6169	20.4424	13.4209	11.7537	10.8101
pgaptmp_001985	pgaptmp_001985	hcp	protein_coding	protein_coding	pgaptmp_001985	0.4717	1662		GO:0016661,GO:0051536		TRUE	-3.73991	7.37062e-08	2.25532e-06	Chromosome_I	2146717	2148378	1662	+	8.96045	2563.32	2441.44	1910.57	2394.59	2641.48	934.35	1300.04	2500.84	2331.56	86.7742	114.29	90.777	73.6457	82.1353	86.952	75.8446	119.836	93.9322	883.479	1234.81	1677.35	63.5521	60.7096	47.9813	77.6185	82.1789	27.5176	37.2443	65.3872
pgaptmp_000053	pgaptmp_000053	gppA	protein_coding	protein_coding	pgaptmp_000053	0.494	1494	GO:0015974	GO:0008894		TRUE	2.31736	8.00793e-08	2.43617e-06	Chromosome_I	58122	59615	1494	-	12.5844	4527.63	4186.72	4696.78	2276.72	2644.21	2630.69	3705.6	4388.23	4125.44	11294.8	12063.9	13021.9	18336.3	14661.1	16098	9111.46	10951.6	11622.5	3311.51	3462.95	3689.5	124.876	115.815	131.217	82.0963	91.5144	86.1891	118.098	127.637
pgaptmp_002936	pgaptmp_002936	pgaptmp_002936	protein_coding	protein_coding	pgaptmp_002936	0.4764	2580				TRUE	-2.23362	8.21761e-08	2.48559e-06	Chromosome_I	3193584	3196163	2580	+	12.4217	9798.43	14504.3	15508.4	11097.3	10360.4	13197.2	15958.4	14517	13766.2	1743.56	1774.21	1739.58	1811.68	1985.68	2088.16	1712.4	1864.11	2570.57	10068.6	10568.5	8856.13	156.493	232.338	250.892	231.718	207.635	250.377	294.511	244.509
pgaptmp_002811	pgaptmp_002811	gltB	protein_coding	protein_coding	pgaptmp_002811	0.4871	4551	GO:0006537,GO:0008152	GO:0003824,GO:0015930,GO:0016491		TRUE	2.15263	8.29006e-08	2.49318e-06	Chromosome_I	3045626	3050176	4551	+	10.5354	2079.95	1648.46	1664.7	999.349	1141.52	762.818	909.51	1299.3	1278.03	2306.58	2053.59	1789.6	2944.35	3581.76	3070.98	1789.93	1772.23	1383.85	689.572	783.066	804.196	18.8323	14.9697	15.2676	11.8297	12.9695	8.20441	9.51554	12.4063
pgaptmp_003153	pgaptmp_003153	pgaptmp_003153	protein_coding	protein_coding	pgaptmp_003153	0.4914	2448				TRUE	2.32843	8.52107e-08	2.54682e-06	Chromosome_I	3416419	3418866	2448	+	10.4132	1140.19	1046.46	939.355	814.854	880.721	712.514	729.836	860.481	798.063	1465.07	1278.96	1385.74	3358.24	4197.78	4215.85	2696.7	2764.21	3622.34	759.423	772.872	942.106	19.1922	17.6666	16.0162	17.9322	18.6025	14.2467	14.1954	15.2745
pgaptmp_002916	pgaptmp_002916	leuD	protein_coding	protein_coding	pgaptmp_002916	0.4478	603	GO:0009098	GO:0003861	GO:0009316	TRUE	1.92542	8.60946e-08	2.54682e-06	Chromosome_I	3174879	3175481	603	+	8.49538	319.162	288.678	336.534	219.088	230.08	230.083	207.888	274.638	283.615	417.727	433.575	429.801	882.275	800.264	799.694	529.227	593.852	517.289	220.73	222.368	232.619	21.8098	19.7851	23.2945	19.5734	19.729	18.6767	16.4152	19.7916
pgaptmp_003160	pgaptmp_003160	pgaptmp_003160	protein_coding	protein_coding	pgaptmp_003160	0.485	600				TRUE	-2.33171	8.62041e-08	2.54682e-06	Chromosome_I	3423597	3424196	600	-	10.8646	4104.39	5210.29	4627.35	2923.74	2789.63	2071.57	5595.9	4521.82	4765.16	678.049	662.154	624.323	699.634	904.598	835.266	547.767	581.868	592.699	3925.08	4749.37	4497.02	281.875	358.883	321.901	262.513	240.403	168.998	444.07	327.491
pgaptmp_002274	pgaptmp_002274	pgaptmp_002274	protein_coding	protein_coding	pgaptmp_002274	0.4532	1560				TRUE	1.98767	8.66198e-08	2.54682e-06	Chromosome_I	2468422	2469981	1560	+	8.73857	393.171	335.325	341.435	244.072	304.497	225.135	174.477	226.875	203.386	805.183	856.265	805.877	930.881	996.723	911.678	721.366	729.665	728.967	240.288	230.014	272.496	10.3852	8.88346	9.13534	8.42864	10.0926	7.06399	5.32534	6.31973
pgaptmp_001725	pgaptmp_001725	pgaptmp_001725	protein_coding	protein_coding	pgaptmp_001725	0.4295	624				TRUE	-2.56142	8.78626e-08	2.56573e-06	Chromosome_I	1821977	1822600	624	-	9.61172	1440.08	1880.81	2011.04	1401.01	1387.31	1748.3	2096.7	1709.02	1658.76	605.401	865.336	781.793	228.302	179.81	168.634	273.041	195.731	171.989	1358.47	1236.72	1149.8	95.0958	124.567	134.517	120.954	114.956	137.14	159.987	119.015
pgaptmp_003699	pgaptmp_003699	pgaptmp_003699	protein_coding	protein_coding	pgaptmp_003699	0.4473	237				TRUE	-2.60492	8.82382e-08	2.56573e-06	Chromosome_II	458124	458360	237	+	7.7001	165.748	217.389	190.322	513.768	313.373	600.359	701.622	475.392	506.707	131.17	70.7507	120.418	66.2811	62.1564	73.7774	102.812	90.5424	108.485	524.723	514.823	398.775	28.8177	37.908	33.5182	116.784	68.3686	123.992	140.957	87.1647
pgaptmp_002758	pgaptmp_002758	pgaptmp_002758	protein_coding	protein_coding	pgaptmp_002758	0.4613	1485				TRUE	-2.40111	8.93385e-08	2.58345e-06	Chromosome_I	2985442	2986926	1485	+	10.7767	10150.7	12932.4	13436.1	4914.11	4113.44	5030.48	10186.5	8376.45	7632.98	193.728	547.865	329.761	366.756	300.793	287.205	283.153	327.55	1793.97	1785.96	1997.49	1688.15	281.663	359.911	377.647	178.272	143.226	165.812	326.612	245.116
pgaptmp_004145	pgaptmp_004145	pgaptmp_004145	protein_coding	protein_coding	pgaptmp_004145	0.4605	519	GO:0033103			TRUE	-3.96914	9.08689e-08	2.61335e-06	Chromosome_II	980332	980850	519	+	7.58798	76.3214	88.8918	115.173	154.387	161.124	262.245	412.806	297.773	263.206	155.386	170.527	81.514	122.252	132.082	82.9996	67.4174	74.5643	43.6586	2552.64	1903.83	1551.07	6.0595	7.07841	9.26243	16.0253	16.0523	24.7327	37.8714	24.9319
pgaptmp_002825	pgaptmp_002825	carA	protein_coding	protein_coding	pgaptmp_002825	0.4658	1155	GO:0006207,GO:0006541	GO:0004088		TRUE	1.89089	9.27487e-08	2.65291e-06	Chromosome_I	3068662	3069816	1155	-	10.4343	1346.8	1135.35	1079.03	808.448	993.371	880.746	540.509	832.122	677.017	1864.64	2291.24	2030.44	3023.89	3186.63	3031.46	2526.47	2430	2422.39	911.978	800.907	919.675	48.0485	40.6247	38.9937	37.7081	44.4707	37.3251	22.282	31.3071
pgaptmp_004894	pgaptmp_004894	pgaptmp_004894	protein_coding	protein_coding	pgaptmp_004894	0.4167	408		GO:0022857	GO:0016020	TRUE	-2.37689	9.44394e-08	2.68667e-06	Chromosome_II	1830245	1830652	408	+	7.33661	229.735	183.064	189.505	320.304	347.509	229.258	124.733	167.171	152.012	151.35	146.944	133.387	66.2811	78.8055	80.3647	70.7883	70.5698	55.5655	459.342	388.029	514.254	23.202	18.5432	19.3866	42.2928	44.0403	27.5041	14.5564	17.8048
pgaptmp_000494	pgaptmp_000494	pgaptmp_000494	protein_coding	protein_coding	pgaptmp_000494	0.4958	474				TRUE	3.50856	9.62885e-08	2.72455e-06	Chromosome_I	513771	514244	474	+	6.53592	358.479	220.029	282.623	21.1401	21.1646	18.9674	19.3039	34.3297	26.0391	234.088	362.824	363.108	344.662	206.448	255.586	207.309	291.6	242.107	13.9703	15.2918	22.4311	31.1633	19.1842	24.8869	2.40266	2.30874	1.95867	1.9391	3.14723
pgaptmp_002797	pgaptmp_002797	grcA	protein_coding	protein_coding	pgaptmp_002797	0.4524	378		GO:0003824		TRUE	-2.98997	9.72363e-08	2.73666e-06	Chromosome_I	3030079	3030456	378	+	13.4271	24331.9	34163.5	32968.1	24882.5	18536.1	31537	46914.4	29677.3	30543.9	4373.01	3223.69	4197.97	2732.25	2909.14	3269.92	2983.22	3624.36	1770.16	30441.7	24397.4	20451.3	2652.42	3735.19	3640.35	3546.23	2535.54	4083.77	5909.45	3411.69
pgaptmp_005004	pgaptmp_005004	pgaptmp_005004	protein_coding	protein_coding	pgaptmp_005004	0.4922	957		GO:0005524,GO:0016887		TRUE	2.65225	9.86251e-08	2.76098e-06	Chromosome_II	1957578	1958534	957	+	8.6985	279.845	198.906	184.604	258.806	250.562	200.394	194.524	299.265	276.577	827.381	691.18	881.833	1406.63	1519.5	1566.45	466.866	553.906	682.662	211.23	214.722	314.866	12.0494	8.58971	8.05137	14.5689	13.5378	10.2496	9.67818	13.5888
pgaptmp_000011	pgaptmp_000011	pgaptmp_000011	protein_coding	protein_coding	pgaptmp_000011	0.4444	261				TRUE	-2.31498	1.02317e-07	2.84917e-06	Chromosome_I	15229	15489	261	+	11.5873	6342.38	8560.02	7448.68	4356.14	3110.52	5175.62	9164.89	5157.66	6011.51	1656.78	1434.97	1511.71	841.034	909.038	903.773	2553.43	1914.71	1762.22	5240.52	4897.19	3987.75	1001.31	1355.43	1191.19	899.136	616.22	970.632	1671.94	858.717
pgaptmp_005218	pgaptmp_005218	pgaptmp_005218	protein_coding	protein_coding	pgaptmp_005218	0.4747	1125				TRUE	-2.93454	1.03216e-07	2.85909e-06	Chromosome_II	2189203	2190327	1125	-	9.50029	3441.4	2670.27	2247.92	2252.38	2469.43	1442.35	2332.8	4390.47	3667.29	183.638	145.13	138.944	179.695	149.841	179.174	144.947	143.803	164.051	1078.5	1530.45	1707.26	126.049	98.0946	83.4006	107.858	113.498	62.7552	98.732	169.588
pgaptmp_000596	pgaptmp_000596	gshA	protein_coding	protein_coding	pgaptmp_000596	0.4621	1569	GO:0006750	GO:0004357		TRUE	2.82698	1.04853e-07	2.88923e-06	Chromosome_I	601622	603190	1569	+	12.0842	4877.63	3528.39	3564.65	1796.27	2532.24	1729.33	2256.33	3377.74	3025.46	7052.92	6010.18	6697.12	14938.3	14917.5	15441.9	4714.16	6065.01	7207.64	1801.6	2114.09	2870.35	128.098	92.9384	94.8276	61.6754	83.45	53.9495	68.4718	93.5494
pgaptmp_000496	pgaptmp_000496	pgaptmp_000496	protein_coding	protein_coding	pgaptmp_000496	0.4148	135				TRUE	3.36469	1.05832e-07	2.90101e-06	Chromosome_I	515117	515251	135	+	8.88148	1658.25	1249.77	1622.23	128.122	118.795	75.0448	156.658	170.156	145.678	1448.93	1460.37	1402.41	796.846	1190.96	1441.29	1191.6	1193.03	1140.42	119.585	107.042	102.186	506.146	382.593	501.555	51.1273	45.4996	27.2095	55.2526	54.771
pgaptmp_000358	pgaptmp_000358	uvrA	protein_coding	protein_coding	pgaptmp_000358	0.4818	2823	GO:0006289	GO:0003677,GO:0005524,GO:0016887		TRUE	1.9531	1.074e-07	2.91613e-06	Chromosome_I	384521	387343	2823	-	11.8016	5209.9	4773.75	4276.93	1623.3	1709.55	1500.07	1899.95	2262.78	2260.48	5640.32	5340.77	5368.81	7619.38	8362.26	8330.26	4063.59	4569.73	5363.4	2234.68	2031.89	2395.97	76.046	69.8861	63.2356	30.978	31.3124	26.0096	32.0452	34.8312
pgaptmp_002289	pgaptmp_002289	ycfP	protein_coding	protein_coding	pgaptmp_002289	0.4259	540				TRUE	-2.64575	1.07492e-07	2.91613e-06	Chromosome_I	2487506	2488045	540	-	11.2043	6323.11	7238.08	7709.25	4872.47	3979.63	5381.79	8744.66	6578.62	6810.98	617.509	671.225	628.028	478.697	630.444	635.013	1375.32	1025.26	1117.93	4526.92	3761.14	3444.42	482.498	553.951	595.881	486.093	381.06	487.827	771.049	529.393
pgaptmp_000493	pgaptmp_000493	pgaptmp_000493	protein_coding	protein_coding	pgaptmp_000493	0.4746	531				TRUE	2.92866	1.09093e-07	2.94439e-06	Chromosome_I	513254	513784	531	+	6.38984	354.624	229.711	301.411	18.5776	19.1164	16.4934	29.6983	28.3593	29.5579	266.376	275.746	274.183	216.518	205.338	159.412	124.722	182.416	187.864	14.5291	21.6633	22.4311	27.519	17.8784	23.6922	1.88478	1.86147	1.52036	2.66299	2.32081
pgaptmp_000272	pgaptmp_000272	astD	protein_coding	protein_coding	pgaptmp_000272	0.5226	1458	GO:0006527	GO:0043824		TRUE	2.25761	1.12351e-07	3.01684e-06	Chromosome_I	287390	288847	1458	+	7.4944	195.814	117.056	158.465	115.95	127.67	98.9602	115.823	195.53	114.009	199.782	297.516	183.407	407.997	317.442	378.109	306.749	468.69	474.953	79.351	67.5387	77.2627	5.53408	3.318	4.53646	4.28428	4.52769	3.32228	3.78243	5.82765
pgaptmp_000633	pgaptmp_000633	hrpB	protein_coding	protein_coding	pgaptmp_000633	0.471	2469		GO:0004386,GO:0005524		TRUE	2.01554	1.13823e-07	3.04086e-06	Chromosome_I	639726	642194	2469	+	10.7478	1554.95	1479.48	1437.62	948.741	996.102	929.402	998.605	1144.82	1185.83	2369.14	2479.9	2473.21	4289.12	3798.2	4064.35	2381.52	2724.26	2993.92	938.801	1071.7	1169.74	25.951	24.7644	24.3033	20.701	20.8606	18.4253	19.2577	20.149
pgaptmp_000634	pgaptmp_000634	mrcB	protein_coding	protein_coding	pgaptmp_000634	0.4686	2388	GO:0009252,GO:0046677	GO:0008233,GO:0008658,GO:0008955	GO:0009274	TRUE	2.27074	1.18668e-07	3.12344e-06	Chromosome_I	642187	644574	2388	+	11.0052	1801.65	1520.84	1643.46	1072.38	1254.86	1136.39	1256.24	1424.68	1422.3	3097.64	2683.09	2893.75	5688.39	5339.9	5659.78	2833.22	3041.16	3331.29	1033.24	1173.64	1458.02	31.088	26.3203	28.7254	24.1924	27.1709	23.2931	25.0478	25.9251
pgaptmp_002454	pgaptmp_002454	htpG	protein_coding	protein_coding	pgaptmp_002454	0.4504	1905	GO:0006457	GO:0005524,GO:0016887,GO:0051082		TRUE	2.72433	1.18772e-07	3.12344e-06	Chromosome_I	2672612	2674516	1905	-	12.4892	4569.26	4116.31	3958.36	2920.53	3090.03	2173.83	2974.28	3830.75	3576.51	10919.4	8832.96	10824.7	18781.1	21078.8	17701.3	8374.93	9352.5	9242.4	2628.64	2811.14	3829.07	98.8346	89.3006	86.7284	82.5908	83.8711	55.8551	74.3396	87.3828
pgaptmp_000517	pgaptmp_000517	pgaptmp_000517	protein_coding	protein_coding	pgaptmp_000517	0.4592	564				TRUE	2.61449	1.19226e-07	3.12344e-06	Chromosome_I	525943	526506	564	-	10.2911	1340.63	991.012	918.118	722.606	904.616	447.795	589.511	954.515	890.256	2233.93	1812.31	1910.02	3863.45	5106.82	4861.4	1031.49	1250.28	1341.51	725.894	693.864	965.368	97.9466	72.6175	67.9454	69.0219	82.9334	38.8627	49.7675	73.543
pgaptmp_002392	pgaptmp_002392	fabG	protein_coding	protein_coding	pgaptmp_002392	0.5028	726		GO:0016491		TRUE	3.63876	1.19288e-07	3.12344e-06	Chromosome_I	2603871	2604596	726	+	11.0709	1867.95	1429.31	1397.6	671.998	878.673	478.308	798.884	1183.63	1131.65	3612.23	3165.64	3154.96	10989.4	11173.7	12688.4	4636.63	5629.61	6718.14	717.512	869.083	1377.44	106.02	81.3638	80.3501	49.865	62.5798	32.2481	52.3938	70.8461
pgaptmp_001706	pgaptmp_001706	uspE	protein_coding	protein_coding	pgaptmp_001706	0.443	948				TRUE	-2.80664	1.2012e-07	3.12967e-06	Chromosome_I	1802536	1803483	948	+	13.3387	30548.6	42109.2	45392.9	25689.7	22591.5	30011.3	43875.5	37438	34856.5	2300.52	2421.85	2426.89	2886.91	2851.43	2774.56	2332.64	2226.28	2473.99	25490.7	20866.3	17027.7	1327.83	1835.74	1998.58	1459.87	1232.2	1549.57	2203.67	1716.1
pgaptmp_002133	pgaptmp_002133	pgaptmp_002133	protein_coding	protein_coding	pgaptmp_002133	0.4771	807		GO:0008168,GO:1904047		TRUE	-3.26744	1.22676e-07	3.13892e-06	Chromosome_I	2317355	2318161	807	-	6.79919	212.775	231.471	424.752	288.914	327.027	184.726	376.426	585.844	534.857	20.18	25.3977	22.2311	26.5124	28.8583	26.3491	32.0233	17.3096	27.7828	250.906	405.869	414.56	10.8644	11.854	21.9686	19.2868	20.9534	11.2044	22.2095	31.5461
pgaptmp_000506	pgaptmp_000506	pgaptmp_000506	protein_coding	protein_coding	pgaptmp_000506	0.4677	201				TRUE	3.21887	1.22746e-07	3.13892e-06	Chromosome_I	519418	519618	201	+	7.80928	551.21	402.213	537.475	61.4984	67.5902	45.3568	75.7306	54.4797	57.0045	665.941	1063.08	948.527	798.319	489.482	642.917	358.998	499.315	455.108	77.6746	59.8928	58.1547	113	82.6994	111.61	16.4828	17.3873	11.0453	17.9394	11.7781
pgaptmp_001939	pgaptmp_001939	pgaptmp_001939	protein_coding	protein_coding	pgaptmp_001939	0.4444	855	GO:0006351,GO:0006355	GO:0003677,GO:0003700,GO:0097367		TRUE	-2.53922	1.22938e-07	3.13892e-06	Chromosome_I	2090923	2091777	855	+	13.3166	21450.2	29388.9	30738.2	19962	17595.3	18843.7	32299.9	28488.4	26308.6	2815.11	2666.76	2710.34	2767.6	3213.27	3235.67	5390.02	4310.08	5356.78	21898.1	18837.6	16263.4	1033.77	1420.56	1500.56	1257.77	1064.08	1078.78	1798.74	1447.9
pgaptmp_000501	pgaptmp_000501	pgaptmp_000501	protein_coding	protein_coding	pgaptmp_000501	0.504	375				TRUE	3.8578	1.23032e-07	3.13892e-06	Chromosome_I	516746	517120	375	+	7.86406	486.452	296.599	477.846	42.2802	40.9638	37.9348	41.5776	45.5242	54.8932	1200.71	1442.23	1313.49	1218.1	773.626	907.726	529.227	611.161	629.743	68.7337	42.0524	78.0935	53.4524	32.6874	53.186	6.07393	5.64823	4.95152	5.27911	5.27531
pgaptmp_002412	pgaptmp_002412	pgaptmp_002412	protein_coding	protein_coding	pgaptmp_002412	0.4964	1926		GO:0003677,GO:0004386,GO:0005524		TRUE	1.99289	1.23587e-07	3.13892e-06	Chromosome_I	2622102	2624027	1926	-	10.3473	925.107	860.754	888.712	721.325	754.416	899.713	719.441	792.568	743.874	2316.67	2675.83	2769.62	2878.07	2862.53	2854.92	2056.23	2075.82	2317.88	716.395	684.307	880.628	19.7922	18.4699	19.2595	20.1762	20.2534	22.8655	17.7857	17.8821
pgaptmp_002017	pgaptmp_002017	torE	protein_coding	protein_coding	pgaptmp_002017	0.4611	180	GO:0009061			TRUE	-2.69274	1.24054e-07	3.13892e-06	Chromosome_I	2185833	2186012	180	-	6.93182	376.21	419.816	477.029	160.793	170	112.155	387.563	361.208	363.14	42.3781	47.1672	57.4303	30.9312	26.6385	36.8887	32.0233	39.9452	52.9196	219.612	264.42	310.712	86.1225	96.3891	110.615	48.1236	48.8337	30.4985	102.518	87.2012
pgaptmp_003912	pgaptmp_003912	pgaptmp_003912	protein_coding	protein_coding	pgaptmp_003912	0.4671	486		GO:0047617		TRUE	-2.08432	1.26638e-07	3.18898e-06	Chromosome_II	683125	683610	486	-	8.71426	412.444	520.149	512.97	748.231	582.368	837.039	1478.97	1095.57	1123.9	143.278	166.899	194.522	154.656	156.501	177.856	256.186	234.345	296.35	671.69	774.783	847.397	34.9693	44.2317	44.0551	82.9399	61.9591	84.3028	144.896	97.9579
pgaptmp_000151	pgaptmp_000151	pgaptmp_000151	protein_coding	protein_coding	pgaptmp_000151	0.439	492				TRUE	-1.97146	1.29945e-07	3.25352e-06	Chromosome_I	158483	158974	492	-	11.8123	6473.44	9403.17	8651.06	7413.12	7587.17	9155.47	12136.2	9419.77	9858.26	958.552	905.247	876.276	1661.45	1560.57	1486.09	1193.29	1236.97	1251.55	7026.48	6531.5	6148.61	542.161	789.861	733.914	811.709	797.368	910.853	1174.49	831.98
pgaptmp_002418	pgaptmp_002418	pgaptmp_002418	protein_coding	protein_coding	pgaptmp_002418	0.4329	231				TRUE	-1.89878	1.30779e-07	3.25352e-06	Chromosome_I	2629021	2629251	231	-	10.377	1763.87	2297.99	1980.81	1908.37	1686.34	2019.61	2175.4	1611.26	1841.03	1428.75	1369.66	1361.65	618.624	556.078	526.982	684.287	644.449	463.046	2247.53	2330.08	2243.94	314.639	411.128	357.909	445.057	377.466	427.946	448.394	303.103
pgaptmp_003515	pgaptmp_003515	pgaptmp_003515	protein_coding	protein_coding	pgaptmp_003515	0.5172	957				TRUE	3.37094	1.31056e-07	3.25352e-06	Chromosome_II	265209	266165	957	-	7.07476	47.7972	39.6053	40.8415	66.6233	92.1685	37.9348	46.7748	50.002	52.0782	270.412	299.33	237.132	829.25	668.182	748.314	301.693	571.216	455.108	58.1163	52.8841	98.0322	2.05802	1.71034	1.78128	3.75041	4.97983	1.94025	2.3272	2.27045
pgaptmp_003369	pgaptmp_003369	pgaptmp_003369	protein_coding	protein_coding	pgaptmp_003369	0.4917	1023	GO:0007165	GO:0000155,GO:0004673,GO:0005524		TRUE	3.21937	1.33186e-07	3.29089e-06	Chromosome_II	105026	106048	1023	-	7.67988	127.202	103.854	105.371	80.7167	121.526	111.33	190.812	247.771	173.829	189.692	214.066	144.502	810.103	664.852	657.409	554.508	593.852	985.627	50.2929	86.6534	83.9089	5.12363	4.19554	4.29919	4.25062	6.14238	5.32685	8.881	10.5248
pgaptmp_000615	pgaptmp_000615	pdhR	protein_coding	protein_coding	pgaptmp_000615	0.4583	768				TRUE	2.29537	1.35131e-07	3.32333e-06	Chromosome_I	619052	619819	768	+	13.9172	11255.5	10359	9931.03	4666.19	6396.49	6988.24	6169.82	7383.12	6568.19	43891.6	46096.8	52567.3	40148.7	38674.6	41191.5	31947.4	31455.5	30026.6	8654.85	7561.78	9799.07	603.894	557.439	539.727	327.315	430.65	445.389	382.511	417.75
pgaptmp_004089	pgaptmp_004089	yccS	protein_coding	protein_coding	pgaptmp_004089	0.474	2154			GO:0016020	TRUE	-2.14824	1.37153e-07	3.35738e-06	Chromosome_II	894296	896449	2154	-	10.6875	3032.81	3248.51	3169.3	3476.58	3558.39	2572.14	4625.51	4775.56	4609.62	702.265	709.322	681.753	631.88	755.867	843.17	379.223	346.192	448.493	3268.48	3743.3	3592.3	58.0173	62.3276	61.4128	86.9503	85.4184	58.4496	102.246	96.3421
pgaptmp_005152	pgaptmp_005152	creD	protein_coding	protein_coding	pgaptmp_005152	0.4676	1341				TRUE	2.93434	1.38827e-07	3.38263e-06	Chromosome_II	2119044	2120384	1341	-	6.80689	37.0043	42.2456	45.7425	49.9675	64.1766	27.2141	42.3201	43.2853	39.4105	443.961	335.612	531.694	337.297	481.712	462.426	262.928	259.644	324.132	39.6755	57.3442	58.9855	1.13706	1.30195	1.42375	2.00735	2.47452	0.993339	1.50262	1.40265
pgaptmp_000568	pgaptmp_000568	truD	protein_coding	protein_coding	pgaptmp_000568	0.4761	1044	GO:0001522	GO:0003723,GO:0009982		TRUE	2.61743	1.4159e-07	3.43404e-06	Chromosome_I	577722	578765	1044	+	11.326	2402.2	1776.08	1921.19	850.088	1166.1	782.611	1150.07	1600.06	1425.11	4498.13	4774.77	5331.76	7333.64	6908.24	7639.91	6011.95	6768.04	6888.8	1003.62	1192.76	1584.3	94.8126	70.3077	76.8086	43.8659	57.7537	36.6926	52.4512	66.6
pgaptmp_000878	pgaptmp_000878	pgaptmp_000878	protein_coding	protein_coding	pgaptmp_000878	0.4607	903		GO:0004601,GO:0020037		TRUE	-2.11387	1.44365e-07	3.48529e-06	Chromosome_I	922558	923460	903	+	12.7233	13680	16813.8	18728.3	12414.4	10333.1	10384.2	14157.2	13351.3	12902	2637.53	2726.62	2502.85	2502.48	2767.07	2841.75	3109.63	3126.38	2915.87	13308.6	12901.2	11164.9	624.248	769.518	865.668	740.629	591.68	562.884	746.486	642.499
pgaptmp_001544	pgaptmp_001544	pgaptmp_001544	protein_coding	protein_coding	pgaptmp_001544	0.4185	681	GO:0000160			TRUE	-2.46637	1.4744e-07	3.54327e-06	Chromosome_I	1600882	1601562	681	-	7.17985	514.205	509.588	490.099	366.428	335.903	244.102	296.24	315.684	359.621	46.4141	30.8401	59.2829	39.7687	44.3975	38.2062	57.3048	46.6027	44.9816	229.112	309.658	304.066	31.1134	30.9253	30.0384	28.9872	25.5041	17.5451	20.7124	20.1439
pgaptmp_005256	pgaptmp_005256	speF	protein_coding	protein_coding	pgaptmp_005256	0.4649	2181	GO:0006520	GO:0004586		TRUE	-2.59926	1.50187e-07	3.59289e-06	Chromosome_II	2234718	2236898	2181	-	7.53466	288.325	271.956	218.911	226.135	206.867	204.518	357.864	287.325	292.764	108.972	78.0072	74.1036	82.4832	65.4862	98.809	124.722	101.194	95.2552	496.782	576.627	648.84	5.44735	5.15329	4.1894	5.58568	4.90433	4.58995	7.8126	5.72473
pgaptmp_002557	pgaptmp_002557	pgaptmp_002557	protein_coding	protein_coding	pgaptmp_002557	0.4352	471				TRUE	-1.77801	1.52577e-07	3.63355e-06	Chromosome_I	2759840	2760310	471	-	9.42272	1669.82	1950.34	1892.6	1269.05	897.106	1448.94	2219.2	1629.17	1754.47	181.62	195.925	196.375	237.139	246.406	246.364	397.763	415.43	439.232	890.743	947.453	888.105	146.085	171.132	167.717	145.151	98.4843	150.579	224.341	150.308
pgaptmp_002610	pgaptmp_002610	proB	protein_coding	protein_coding	pgaptmp_002610	0.4754	1140	GO:0006561	GO:0004349	GO:0005737	TRUE	2.91783	1.53983e-07	3.65051e-06	Chromosome_I	2818205	2819344	1140	-	11.7102	2341.29	1949.46	1943.24	1731.56	1991.52	1486.05	1378.74	1869.48	1893.11	5626.19	4560.7	5741.18	13182.6	11274.7	11616	6456.9	7873.19	8156.23	1251.73	1735.62	2081.11	84.627	70.6726	71.148	81.8273	90.3284	63.8061	57.5853	71.2611
pgaptmp_002221	pgaptmp_002221	cmoA	protein_coding	protein_coding	pgaptmp_002221	0.4472	738				TRUE	1.72915	1.73281e-07	4.0678e-06	Chromosome_I	2404221	2404958	738	+	9.98644	816.407	774.503	798.861	406.146	522.971	479.957	514.523	538.827	529.931	2342.9	2387.38	2445.42	1857.34	1975.69	2094.75	1995.56	1894.73	1775.45	607.985	601.477	674.595	45.5836	43.3719	45.181	29.6476	36.6408	31.8331	33.1956	31.7271
pgaptmp_002411	pgaptmp_002411	tsaB	protein_coding	protein_coding	pgaptmp_002411	0.4943	702	GO:0002949			TRUE	1.85233	1.73476e-07	4.0678e-06	Chromosome_I	2621355	2622056	702	-	10.3453	1066.19	999.813	979.38	623.312	785.822	691.072	763.246	778.389	798.767	2211.73	2441.81	2923.39	2931.1	2452.96	2769.29	1887.69	2061.17	2399.9	778.981	751.208	854.043	62.5827	58.8604	58.2311	47.8336	57.8803	48.1858	51.7679	48.1833
pgaptmp_004981	pgaptmp_004981	azu	protein_coding	protein_coding	pgaptmp_004981	0.4702	453		GO:0005507,GO:0009055		TRUE	-1.79958	1.73904e-07	4.0678e-06	Chromosome_II	1918490	1918942	453	+	8.96503	393.942	471.743	456.608	688.014	488.834	862.603	1278.51	782.866	902.22	262.34	424.504	274.183	173.804	155.391	168.634	756.761	797.572	935.353	650.455	629.511	627.24	35.8337	43.0377	42.0714	81.8207	55.7965	93.2064	134.381	75.0977
pgaptmp_002068	pgaptmp_002068	pgaptmp_002068	protein_coding	protein_coding	pgaptmp_002068	0.4887	3276				TRUE	1.82731	1.76225e-07	4.10386e-06	Chromosome_I	2232433	2235708	3276	-	12.7853	6140.4	6057.84	6348.41	4021.1	4704.69	4195.09	4059.76	4668.84	4295.75	10320.1	10781.3	10948.8	14930.9	15057.4	15428.7	9639.01	10253.9	11224.2	4320.16	4516.17	4761.21	77.2344	76.4216	80.8839	66.1249	74.2559	62.6802	59.005	61.9302
pgaptmp_002652	pgaptmp_002652	pgaptmp_002652	protein_coding	protein_coding	pgaptmp_002652	0.4875	2043				TRUE	-1.95699	1.82018e-07	4.22009e-06	Chromosome_I	2869815	2871857	2043	+	10.266	2762.99	2745.08	3063.93	1679.04	1716.38	1454.72	2347.65	2431.44	2457.53	556.969	569.634	518.725	539.086	548.309	525.664	532.598	585.863	635.035	1929.57	2448.6	2363.57	55.7274	55.5302	62.5967	44.2747	43.44	34.8532	54.7139	51.7169
pgaptmp_001932	pgaptmp_001932	pgaptmp_001932	protein_coding	protein_coding	pgaptmp_001932	0.4418	498	GO:0000160			TRUE	-1.90042	1.96452e-07	4.50618e-06	Chromosome_I	2083765	2084262	498	+	8.5098	1002.2	925.883	1003.89	862.9	750.32	582.216	852.341	1040.34	1027.49	106.954	116.104	94.4821	136.981	132.082	151.507	106.182	154.455	174.635	524.164	614.857	603.147	82.9245	76.8366	84.1387	93.3459	77.9042	57.2252	81.4923	90.7785
pgaptmp_001422	pgaptmp_001422	pgaptmp_001422	protein_coding	protein_coding	pgaptmp_001422	0.4654	3036		GO:0046872,GO:0050660,GO:0051536		TRUE	1.83604	1.9763e-07	4.50618e-06	Chromosome_I	1471721	1474756	3036	+	11.0462	2244.93	1909.85	2037.99	1453.54	1642.65	1335.14	1511.64	1881.42	1780.51	2478.11	2581.49	2421.34	4680.92	4469.71	4339.69	2260.17	2637.71	2403.87	1198.09	1322.74	1484.61	30.469	25.998	28.0183	25.7923	27.976	21.5257	23.7072	26.929
pgaptmp_003932	pgaptmp_003932	pgaptmp_003932	protein_coding	protein_coding	pgaptmp_003932	0.4372	1107		GO:0016746		TRUE	-1.84064	1.98651e-07	4.50618e-06	Chromosome_II	702720	703826	1107	+	11.2303	2440.74	2735.4	2423.54	4115.91	3854.01	3806.67	3306.16	3108.33	3285.85	1091.74	1122.94	1198.63	1325.62	1148.78	1385.96	2201.18	1772.23	2053.28	4980.68	4606.01	5189.06	90.8516	102.121	91.3783	200.301	180.015	168.318	142.203	122.016
pgaptmp_001886	pgaptmp_001886	pgaptmp_001886	protein_coding	protein_coding	pgaptmp_001886	0.4491	216				TRUE	-2.11393	1.99395e-07	4.50618e-06	Chromosome_I	2026397	2026612	216	-	9.46478	1950.43	2418.56	2722.5	1339.51	889.596	1037.43	1742.55	1489.61	1499.01	276.466	293.888	294.562	191.479	221.987	260.856	364.054	346.192	263.275	985.182	1038.57	1172.23	372.08	462.748	526.083	334.085	212.953	235.093	384.117	299.679
pgaptmp_005285	pgaptmp_005285	pgaptmp_005285	protein_coding	protein_coding	pgaptmp_005285	0.4309	246				TRUE	-2.31068	2.00442e-07	4.50618e-06	Chromosome_II	2270250	2270495	246	+	7.47483	210.462	257.874	266.287	368.35	242.369	470.061	755.822	435.092	527.82	74.6661	63.4943	68.5459	44.1874	66.5962	54.0156	117.98	81.2219	83.3483	318.522	337.056	324.836	35.253	43.3226	45.181	80.6658	50.9431	93.5302	146.291	76.8569
pgaptmp_002691	pgaptmp_002691	hscB	protein_coding	protein_coding	pgaptmp_002691	0.4477	516	GO:0097428	GO:0051087		TRUE	2.82979	2.0061e-07	4.50618e-06	Chromosome_I	2915387	2915902	516	-	10.9851	1541.07	1064.06	1051.26	705.31	958.552	545.931	667.469	947.052	1030.3	4536.47	4537.12	4283.19	7283.56	8607.56	7495	4926.53	4766.79	4635.75	1028.77	930.887	1529.47	123.064	85.2233	85.0358	73.6367	96.0528	51.787	61.5906	79.7557
pgaptmp_003446	pgaptmp_003446	pgaptmp_003446	protein_coding	protein_coding	pgaptmp_003446	0.4428	813	GO:0006355	GO:0003700,GO:0043565		TRUE	-1.84821	2.00928e-07	4.50618e-06	Chromosome_II	195407	196219	813	-	8.41033	430.946	508.708	410.866	392.052	376.184	349.659	793.687	604.501	652.385	183.638	190.483	150.06	151.71	153.171	131.745	397.763	303.583	247.399	583.398	580.45	578.224	21.8419	25.8594	21.0936	25.9787	23.9251	21.0517	46.4827	32.3105
pgaptmp_000934	pgaptmp_000934	fadI	protein_coding	protein_coding	pgaptmp_000934	0.4962	1308	GO:0006631,GO:0016042	GO:0003988	GO:0005737	TRUE	2.19761	2.01207e-07	4.50618e-06	Chromosome_I	980574	981881	1308	+	7.80746	281.387	191.865	205.025	167.199	143.373	94.8369	85.3826	140.304	123.862	565.041	555.121	511.315	377.066	453.964	400.506	372.481	434.071	448.493	86.0568	75.1846	104.678	8.8645	6.06221	6.54243	6.88636	5.66766	3.54897	3.1081	4.66122
pgaptmp_002795	pgaptmp_002795	ung	protein_coding	protein_coding	pgaptmp_002795	0.4714	681	GO:0006284	GO:0004844,GO:0016799		TRUE	2.08204	2.04514e-07	4.56083e-06	Chromosome_I	3027785	3028465	681	-	12.0305	2960.34	2926.39	3113.76	2310.03	2249.59	1688.92	2686.21	2653.09	2682.73	9276.76	7532.23	8257	9980.46	12154.9	11840	4739.44	5477.82	5089.54	2511.85	3020.13	2982.51	179.124	177.593	190.844	182.741	170.805	121.393	187.813	169.294
pgaptmp_002802	pgaptmp_002802	pgaptmp_002802	protein_coding	protein_coding	pgaptmp_002802	0.4289	471				TRUE	-2.58834	2.10423e-07	4.6728e-06	Chromosome_I	3036693	3037163	471	+	11.4765	4512.98	7213.44	6279.8	5911.54	5879.67	6733.42	8086.84	6151.73	6776.5	1182.55	1102.99	1094.88	913.206	785.835	683.759	1661.84	1220.99	1173.49	5758.54	5386.53	4208.74	394.822	632.941	556.5	676.151	645.469	699.757	817.506	567.563
pgaptmp_000050	pgaptmp_000050	recQ	protein_coding	protein_coding	pgaptmp_000050	0.5033	1836	GO:0006310	GO:0003678		TRUE	1.83164	2.1225e-07	4.69357e-06	Chromosome_I	54857	56692	1836	+	10.9724	1756.16	1533.16	1520.12	992.943	1295.82	1165.26	910.253	1115.72	1108.42	2782.83	3060.42	3482.87	4682.39	4188.9	4520.18	3401.21	3882.67	4093.33	1299.23	1202.95	1485.44	39.414	34.511	34.5579	29.1351	36.4935	31.0657	23.606	26.4069
pgaptmp_004846	pgaptmp_004846	pgaptmp_004846	protein_coding	protein_coding	pgaptmp_004846	0.4674	537				TRUE	-1.98385	2.1679e-07	4.77391e-06	Chromosome_II	1771200	1771736	537	-	10.0502	1999	1904.57	1743.93	2167.82	2459.19	1086.91	2128.63	2704.58	2616.58	492.393	694.809	590.977	471.332	506.131	480.871	261.243	295.594	366.468	1741.81	2203.93	2275.51	153.39	146.577	135.549	217.477	236.789	99.0726	188.737	218.859
pgaptmp_000288	pgaptmp_000288	pgaptmp_000288	protein_coding	protein_coding	pgaptmp_000288	0.4547	717		GO:0003677,GO:0140110		TRUE	-1.72642	2.23605e-07	4.90348e-06	Chromosome_I	302622	303338	717	+	12.7107	11035.8	13265.1	13611.7	11610.4	11021.3	10716.6	14163.1	14443.8	13272.9	2704.12	2795.56	2799.26	2719	2724.89	2694.19	4695.62	4018.48	4339.4	9969.17	9412.73	9313.06	634.222	764.599	792.379	872.352	794.8	731.593	940.529	875.389
pgaptmp_005281	pgaptmp_005281	pgaptmp_005281	protein_coding	protein_coding	pgaptmp_005281	0.4463	726				TRUE	-3.0694	2.27812e-07	4.97501e-06	Chromosome_II	2263276	2264001	726	-	10.0351	1416.96	1467.15	1599.35	3598.94	3401.36	2738.72	4081.29	4228.52	4275.34	173.548	319.285	192.669	328.46	188.689	233.189	480.349	466.027	783.21	2026.8	2600.24	2252.25	80.4226	83.5182	91.9494	267.056	242.248	184.648	267.666	253.099
pgaptmp_000500	pgaptmp_000500	pgaptmp_000500	protein_coding	protein_coding	pgaptmp_000500	0.526	192				TRUE	3.32078	2.31957e-07	5.02755e-06	Chromosome_I	516558	516749	192	+	7.44347	481.827	234.991	374.109	35.8741	34.8192	25.5647	26.7285	35.8223	45.7444	768.859	983.254	872.57	637.772	542.759	635.013	375.852	366.164	467.015	64.2632	34.4065	71.4472	103.407	50.5815	81.3275	10.0657	9.37695	6.51737	6.62835	8.10755
pgaptmp_002694	pgaptmp_002694	pgaptmp_002694	protein_coding	protein_coding	pgaptmp_002694	0.465	1215	GO:0044571	GO:0030170,GO:0031071		TRUE	3.23912	2.32129e-07	5.02755e-06	Chromosome_I	2916776	2917990	1215	-	13.5344	11659.4	7631.49	8017.19	3467.61	4084.09	2254.64	3364.07	6090.54	5559.7	29828.1	29936.6	31955.3	47698.8	56109.5	52648.1	24477.6	27473	27674.3	4688.98	4944.34	8032.83	395.421	259.582	275.415	153.751	173.805	90.8311	131.832	217.83
pgaptmp_002410	pgaptmp_002410	pgaptmp_002410	protein_coding	protein_coding	pgaptmp_002410	0.4706	306				TRUE	2.03538	2.33846e-07	5.03154e-06	Chromosome_I	2620989	2621294	306	-	8.23946	276.761	191.865	219.727	143.496	227.349	133.596	123.99	140.304	178.755	617.509	624.058	696.574	782.117	791.385	893.234	311.806	419.424	422.034	176.025	205.165	240.096	37.2685	25.913	29.9712	25.2629	38.4163	21.3701	19.293	19.9244
pgaptmp_002608	pgaptmp_002608	nrdR	protein_coding	protein_coding	pgaptmp_002608	0.4333	450	GO:0006355	GO:0008270,GO:0140110		TRUE	1.68491	2.34811e-07	5.03154e-06	Chromosome_I	2816360	2816809	450	-	11.3903	2281.16	2481.05	2421.9	1188.33	1330.64	1721.08	2277.12	2401.59	2090.17	2944.27	2692.16	3486.58	5225.9	4710.57	5243.47	5663.06	4930.57	5102.77	1692.64	1663.62	1644.95	208.882	227.858	224.639	142.262	152.894	187.207	240.938	231.912
pgaptmp_002607	pgaptmp_002607	ribD	protein_coding	protein_coding	pgaptmp_002607	0.48	1125		GO:0008703,GO:0008835		TRUE	2.45867	2.36065e-07	5.03154e-06	Chromosome_I	2815228	2816352	1125	-	11.6376	3284.13	2466.97	2466.01	1436.24	1941.68	1291.43	1718.79	2614.28	2327.33	4029.95	3923.94	4323.95	9472.31	8734.09	9276.19	5002.37	5886.59	6009.02	1404.29	1692.93	2213.2	120.289	90.6259	91.4921	68.7765	89.2421	56.189	72.7449	100.98
pgaptmp_003809	pgaptmp_003809	pgaptmp_003809	protein_coding	protein_coding	pgaptmp_003809	0.4655	1158	GO:0055085	GO:0022857,GO:0042802	GO:0016020	TRUE	2.00275	2.36137e-07	5.03154e-06	Chromosome_II	563517	564674	1158	+	7.77416	114.097	102.974	130.693	167.199	150.2	125.35	126.218	212.695	178.051	328.935	328.356	413.128	474.278	620.454	520.394	274.726	372.822	305.61	129.085	135.715	144.556	4.05996	3.67502	4.71069	7.77838	6.70667	5.29843	5.18973	7.98153
pgaptmp_000761	pgaptmp_000761	recD	protein_coding	protein_coding	pgaptmp_000761	0.4894	2160	GO:0006302,GO:0006310	GO:0004386,GO:0008854	GO:0009338	TRUE	1.72571	2.39065e-07	5.07338e-06	Chromosome_I	806703	808862	2160	+	10.9797	1818.61	1578.93	1609.97	1085.83	1232.33	1036.61	1145.61	1442.59	1399.78	2088.63	2487.16	2699.23	4063.77	3567.34	3758.7	4914.73	4575.05	5569.78	1146.12	1192.12	1309.31	34.6931	30.21	31.1104	27.0815	29.4996	23.4906	25.2532	29.022
pgaptmp_000080	pgaptmp_000080	pgaptmp_000080	protein_coding	protein_coding	pgaptmp_000080	0.4891	597	GO:0006400	GO:0016432		TRUE	2.10397	2.45546e-07	5.17468e-06	Chromosome_I	88412	89008	597	-	7.70744	153.414	137.298	142.945	105.7	92.1685	93.1876	66.0787	108.213	111.898	393.511	241.278	339.024	462.495	633.774	590.219	515.743	529.939	604.606	129.644	124.883	142.894	10.5888	9.50456	9.99394	9.5382	7.98274	7.6404	5.27011	7.87668
pgaptmp_002915	pgaptmp_002915	leuC	protein_coding	protein_coding	pgaptmp_002915	0.4792	1419	GO:0009098	GO:0003861,GO:0051539	GO:0009316	TRUE	2.45516	2.46925e-07	5.17468e-06	Chromosome_I	3173450	3174868	1419	+	8.97544	595.152	393.412	382.277	282.508	304.497	187.2	210.858	419.419	427.886	785.003	790.957	650.259	1434.62	1636.05	1483.45	549.452	709.693	769.98	230.23	269.518	365.544	17.2824	11.458	11.2444	10.7254	11.0955	6.45737	7.07522	12.8441
pgaptmp_002794	pgaptmp_002794	pgaptmp_002794	protein_coding	protein_coding	pgaptmp_002794	0.4366	552				TRUE	1.9845	2.47301e-07	5.17468e-06	Chromosome_I	3027091	3027642	552	-	10.1198	666.848	788.585	909.95	681.608	694.336	630.871	628.119	517.184	582.713	2441.78	2075.36	2289.8	2396.43	2552.85	2533.46	2089.94	1892.07	1674.9	711.365	709.793	565.762	49.779	59.0406	68.8049	66.5211	65.0391	55.9416	54.1796	40.714
pgaptmp_003907	pgaptmp_003907	malK	protein_coding	protein_coding	pgaptmp_003907	0.4531	1119	GO:0008643,GO:0055085	GO:0005524,GO:0140359	GO:0043190	TRUE	-1.73135	2.48668e-07	5.17468e-06	Chromosome_II	676824	677942	1119	-	10.3184	1788.54	1756.71	1332.25	2262.63	1798.99	2156.51	3058.18	2901.61	2873.45	645.761	731.091	691.016	475.751	485.042	515.124	916.877	744.312	1243.61	1777.02	1856.04	1634.98	65.8608	64.8802	49.6932	108.93	83.1272	94.3309	130.127	112.68
pgaptmp_001459	pgaptmp_001459	cdd	protein_coding	protein_coding	pgaptmp_001459	0.4538	888	GO:0009972	GO:0004126,GO:0008270		TRUE	-2.19097	2.48754e-07	5.17468e-06	Chromosome_I	1510309	1511196	888	-	12.3435	6744.8	9530.79	10476.7	7883.97	6737.17	9924.06	10242.2	7820.46	8097.46	1224.93	1438.6	1313.49	1883.86	1673.78	1943.24	8378.3	6590.95	8514.76	10204.4	8905.55	7649	312.979	443.565	492.438	478.295	392.291	547.028	549.178	382.698
pgaptmp_000076	pgaptmp_000076	pgaptmp_000076	protein_coding	protein_coding	pgaptmp_000076	0.4686	732				TRUE	1.86769	2.53188e-07	5.22938e-06	Chromosome_I	83309	84040	732	+	10.9553	1891.84	1541.96	1455.59	1151.81	1258.95	985.479	1163.43	1594.09	1482.12	2102.76	2057.21	2178.65	4773.71	4074.58	4263.28	3804.03	3961.23	4476.99	1152.83	1236.72	1418.14	106.496	87.0573	82.9984	84.7687	88.9288	65.8975	75.6767	94.6324
pgaptmp_000003	pgaptmp_000003	recF	protein_coding	protein_coding	pgaptmp_000003	0.4537	1080	GO:0006281	GO:0003697,GO:0005524		TRUE	2.10054	2.53371e-07	5.22938e-06	Chromosome_I	2581	3660	1080	+	12.2182	3426.75	2859.5	2988.78	2424.7	2895.46	1972.61	2329.83	2839.66	2831.93	9139.54	7764.44	8966.54	11907	12414.6	11800.4	8951.35	8879.81	9940.94	2677.26	2697.72	3583.16	130.743	109.423	115.508	120.948	138.624	89.4025	102.715	114.256
pgaptmp_003221	pgaptmp_003221	rsmB	protein_coding	protein_coding	pgaptmp_003221	0.4938	1284	GO:0001510,GO:0006355,GO:0006364	GO:0003723,GO:0008649		TRUE	1.85545	2.61232e-07	5.37056e-06	Chromosome_I	3488152	3489435	1284	+	11.7244	2546.36	2576.98	2509.3	1696.33	1782.61	1624.6	1787.84	1826.19	1799.51	5503.1	6298.63	5789.35	6523.53	7924.95	7949.52	6493.98	7068.96	6921.88	2205.06	2058.66	2300.43	81.717	82.9446	81.5698	71.1721	71.7851	61.9318	66.2973	61.8043
pgaptmp_003223	pgaptmp_003223	pgaptmp_003223	protein_coding	protein_coding	pgaptmp_003223	0.4751	1446		GO:0015079		TRUE	1.63967	2.62932e-07	5.38448e-06	Chromosome_I	3490886	3492331	1446	+	10.9028	1310.57	1283.21	1410.67	1010.88	1186.58	1079.49	1146.35	1101.54	1194.28	2728.34	3296.26	2869.66	3869.34	3505.18	3819.3	3884.93	3978.54	4250.76	1204.79	1262.21	1337.56	37.3465	36.6751	40.719	37.6613	42.4301	36.5413	37.7471	33.103
pgaptmp_000569	pgaptmp_000569	surE	protein_coding	protein_coding	pgaptmp_000569	0.4813	777		GO:0008252		TRUE	2.33137	2.66618e-07	5.4388e-06	Chromosome_I	578765	579541	777	+	10.4634	1391.52	1166.15	1115.79	572.704	754.416	630.047	691.97	950.037	845.215	2120.92	2242.25	2491.73	4158.04	3673.89	3999.79	2142.19	2250.24	2648.62	687.337	756.943	1042.63	73.7947	62.0264	59.9381	39.7076	50.2035	39.6903	42.4032	53.1321
pgaptmp_004074	pgaptmp_004074	pgaptmp_004074	protein_coding	protein_coding	pgaptmp_004074	0.4492	699				TRUE	-2.14719	2.71396e-07	5.51489e-06	Chromosome_II	862865	863563	699	+	11.8991	4285.56	5526.25	5969.4	6696.28	4994.17	8320.08	10015.7	7282.37	7523.19	1789.97	1926.6	1915.58	1562.76	1457.35	1621.79	1971.96	2267.55	1845.57	8324.04	7443.27	6148.61	252.632	326.735	356.447	516.084	369.428	582.617	682.243	452.724
pgaptmp_002419	pgaptmp_002419	feoB	protein_coding	protein_coding	pgaptmp_002419	0.455	2277	GO:0006826	GO:0005525,GO:0015093	GO:0016020	TRUE	-1.80171	2.73195e-07	5.51922e-06	Chromosome_I	2629248	2631524	2277	-	13.393	15721.4	16081.5	17380.5	18466.8	17234.1	11954.4	14961.3	17138	15589.7	9524.98	11325.6	10378.2	4420.21	4951.43	4601.87	5054.62	5168.91	4543.14	16628	17049.1	18229.8	284.503	291.88	318.596	436.911	391.355	256.979	312.851	327.065
pgaptmp_002906	pgaptmp_002906	ilvN	protein_coding	protein_coding	pgaptmp_002906	0.4747	495	GO:0009082	GO:1990610		TRUE	1.86277	2.73707e-07	5.51922e-06	Chromosome_I	3161202	3161696	495	-	10.0313	572.025	495.506	553.811	748.231	833.613	687.774	769.928	1204.52	1104.2	1237.04	1326.12	1435.76	2315.42	1953.49	2014.39	1862.41	1857.45	2239.82	548.193	601.477	671.271	47.6176	41.37	46.6979	81.4319	87.0769	68.01	74.059	105.742
pgaptmp_000005	pgaptmp_000005	pgaptmp_000005	protein_coding	protein_coding	pgaptmp_000005	0.4269	438				TRUE	2.58419	2.79353e-07	5.61159e-06	Chromosome_I	6670	7107	438	+	12.0405	2485.45	3015.28	3224.03	2197.93	2446.9	2842.63	1980.13	1477.67	1666.5	9411.97	7319.98	8438.55	14885.3	16756.7	17011	4892.82	5381.95	4944.01	3544.53	2696.45	2345.3	233.824	284.508	307.232	270.336	288.859	317.672	215.255	146.602
pgaptmp_005164	pgaptmp_005164	pgaptmp_005164	protein_coding	protein_coding	pgaptmp_005164	0.4724	870	GO:0055085	GO:0022857	GO:0016020	TRUE	2.08434	2.81651e-07	5.63623e-06	Chromosome_II	2130730	2131599	870	+	7.50567	65.5284	63.3684	77.5989	104.419	85.3412	89.0642	95.0345	103.735	81.6361	456.069	321.1	439.064	497.845	521.67	508.537	416.303	495.32	390.282	117.909	140.812	103.017	3.10362	3.0102	3.72287	6.46585	5.07205	5.01091	5.2011	5.18138
pgaptmp_001944	pgaptmp_001944	pgaptmp_001944	protein_coding	protein_coding	pgaptmp_001944	0.4685	2286				TRUE	1.6476	2.85494e-07	5.67014e-06	Chromosome_I	2097060	2099345	2286	-	7.9935	235.902	227.07	216.46	183.214	210.963	190.498	152.946	229.86	199.164	322.881	326.542	329.761	435.982	440.645	412.363	353.941	419.424	465.692	138.585	138.9	142.064	4.25221	4.10512	3.95223	4.31764	4.77172	4.07895	3.18563	4.36942
pgaptmp_000260	pgaptmp_000260	hmpA	protein_coding	protein_coding	pgaptmp_000260	0.4624	1185	GO:0051409	GO:0008941,GO:0019825,GO:0020037,GO:0071949		TRUE	-2.90454	2.855e-07	5.67014e-06	Chromosome_I	271432	272616	1185	-	10.618	2157.04	3024.96	4544.85	4491.31	4427.5	2502.04	4106.53	5656.94	5763.79	419.745	431.761	463.148	440.401	537.209	496.68	505.631	495.32	457.754	2759.4	4596.45	4579.27	75.0064	105.498	160.082	204.183	193.19	103.35	165.002	207.444
pgaptmp_005302	pgaptmp_005302	pgaptmp_005302	protein_coding	protein_coding	pgaptmp_005302	0.4884	774				TRUE	-1.74495	2.92255e-07	5.78247e-06	Chromosome_II	2288747	2289520	774	+	9.4936	854.953	920.602	960.593	1219.08	1186.58	1005.27	1654.19	1611.26	1629.91	304.719	402.735	351.992	435.982	385.148	379.427	269.67	284.942	326.778	1354.56	1433.6	1557.72	45.5155	49.1556	51.8012	84.8506	79.2686	63.5733	101.76	90.461
pgaptmp_001603	pgaptmp_001603	pgaptmp_001603	protein_coding	protein_coding	pgaptmp_001603	0.4948	1152		GO:0042626,GO:0140359		TRUE	2.4551	2.94289e-07	5.78829e-06	Chromosome_I	1672559	1673710	1152	-	7.03109	100.22	89.7719	98.8365	69.1857	71.0039	78.3435	72.0184	71.6446	86.5624	552.933	595.032	666.933	356.445	290.803	254.269	109.553	161.112	111.131	45.2636	46.5125	62.3086	3.58476	3.22055	3.58101	3.2354	3.18694	3.32877	2.97662	2.70252
pgaptmp_000004	pgaptmp_000004	gyrB	protein_coding	protein_coding	pgaptmp_000004	0.4835	2418	GO:0006265	GO:0003677,GO:0003918,GO:0005524	GO:0005694	TRUE	2.98504	2.95581e-07	5.78829e-06	Chromosome_I	3674	6091	2418	+	13.8718	13456.5	9501.74	8607.76	5673.23	7447.9	3555.15	4734.65	8639.14	8346.59	31836	31226.5	33646.8	55397.8	62863.5	62654.2	26021.4	29417	31541.4	6798.48	6683.14	10879.9	229.315	162.401	148.585	126.397	159.265	71.9671	93.2319	155.257
pgaptmp_002191	pgaptmp_002191	pgaptmp_002191	protein_coding	protein_coding	pgaptmp_002191	0.4429	420				TRUE	-1.97839	2.95849e-07	5.78829e-06	Chromosome_I	2372352	2372771	420	-	8.08415	546.584	743.699	706.559	481.097	375.501	473.36	663.757	494.049	506.707	127.134	88.892	85.2192	125.198	124.313	125.158	111.239	93.2054	88.6403	602.956	567.07	475.207	53.6248	73.1795	70.2166	61.7089	46.2281	55.1664	75.2476	51.1162
pgaptmp_002503	pgaptmp_002503	pgaptmp_002503	protein_coding	protein_coding	pgaptmp_002503	0.4479	960				TRUE	-2.2762	2.98497e-07	5.81848e-06	Chromosome_I	2719935	2720894	960	-	12.9792	9558.67	9837.07	9890.19	13964	11343.5	11627.8	10577.8	10226.5	10129.9	5704.9	5279.09	5318.79	3900.28	5033.56	3914.16	3967.52	4187.59	2720.07	23971.8	19631.5	22737.7	410.284	423.483	430.006	783.614	610.972	592.871	524.634	462.907
pgaptmp_002407	pgaptmp_002407	fadD	protein_coding	protein_coding	pgaptmp_002407	0.487	1692				TRUE	1.84678	3.02381e-07	5.87245e-06	Chromosome_I	2617747	2619438	1692	-	11.8229	3224.77	3087.45	3082.72	1782.81	2190.88	1708.71	2012.06	2312.03	2026.12	8850.96	9275.6	9592.72	8052.42	6948.2	7672.85	3684.36	4650.95	4446.57	2064.24	2112.18	2518.1	78.5338	75.4121	76.0457	56.7636	66.9517	49.4313	56.6204	59.3787
pgaptmp_000498	pgaptmp_000498	pgaptmp_000498	protein_coding	protein_coding	pgaptmp_000498	0.5357	336				TRUE	3.92175	3.07873e-07	5.94103e-06	Chromosome_I	516096	516431	336	+	8.7734	1167.95	782.424	1110.07	81.3573	79.1966	103.084	112.111	95.5261	132.307	1743.56	2374.69	2065.64	1883.86	1175.42	1475.55	1014.63	1059.88	1128.51	138.585	70.0873	83.0781	143.233	96.2375	137.896	13.0443	12.1874	15.017	15.887	12.3544
pgaptmp_005269	pgaptmp_005269	pgaptmp_005269	protein_coding	protein_coding	pgaptmp_005269	0.434	318				TRUE	-2.02009	3.0817e-07	5.94103e-06	Chromosome_II	2253877	2254194	318	+	7.07742	205.065	191.865	165	262.009	209.598	213.589	245.753	217.173	235.759	44.3961	87.0778	90.777	53.0249	53.2769	61.9203	80.9009	78.5588	63.5035	297.846	263.146	244.25	26.572	24.9351	21.657	44.3867	34.0803	32.8764	36.7964	29.6767
pgaptmp_004128	pgaptmp_004128	pgaptmp_004128	protein_coding	protein_coding	pgaptmp_004128	0.4286	357				TRUE	-2.75592	3.10072e-07	5.95588e-06	Chromosome_II	942904	943260	357	+	9.48549	807.156	1057.02	1330.62	1463.79	1235.74	2151.56	3581.61	2707.57	2470.2	278.484	197.739	246.395	159.075	172.04	202.888	488.776	316.898	322.809	1595.96	1380.08	1000.26	93.1639	122.365	155.57	220.889	178.979	294.997	477.687	329.571
pgaptmp_002631	pgaptmp_002631	dnaK	protein_coding	protein_coding	pgaptmp_002631	0.4502	1917	GO:0006457	GO:0005524,GO:0016887		TRUE	2.49813	3.11608e-07	5.96361e-06	Chromosome_I	2845485	2847401	1917	-	15.5934	39095.8	35738	29009.7	24769.1	27497.6	17097.9	21713.9	29742.2	27710.5	102906	88199	106020	149513	171198	156678	75224.4	76018.3	76869.6	26584.3	27458.3	35994.4	840.362	770.46	631.63	696.07	741.68	436.568	539.323	674.2
pgaptmp_001111	pgaptmp_001111	pgaptmp_001111	protein_coding	protein_coding	pgaptmp_001111	0.4779	768				TRUE	-2.99877	3.19564e-07	6.09371e-06	Chromosome_I	1183819	1184586	768	-	8.42431	2207.15	1596.53	1413.12	921.195	955.821	550.879	927.329	1522.45	1430.04	50.4501	90.7061	38.9044	98.6852	91.0148	115.936	65.732	62.5808	56.8885	735.953	787.526	1269.43	118.421	85.9128	76.7994	64.6182	64.3516	35.1097	57.4917	86.1427
pgaptmp_003320	pgaptmp_003320	nagB	protein_coding	protein_coding	pgaptmp_003320	0.4682	801	GO:0006044	GO:0004342		TRUE	-2.17026	3.22285e-07	6.09591e-06	Chromosome_II	55586	56386	801	+	11.1713	1884.14	2075.32	2439.06	3695.03	3326.26	3472.68	4501.52	4047.92	4065.62	1305.65	1338.82	1374.62	1117.94	1233.14	1551.96	1090.48	1029.25	981.658	6781.72	6279.19	5677.56	96.9254	107.076	127.096	248.513	214.717	212.21	267.583	219.602
pgaptmp_004913	pgaptmp_004913	pgaptmp_004913	protein_coding	protein_coding	pgaptmp_004913	0.4155	426				TRUE	-2.58199	3.22725e-07	6.09591e-06	Chromosome_II	1848598	1849023	426	+	9.54803	1314.42	1552.53	1573.22	1628.43	1182.49	1898.39	3305.42	2238.15	2465.27	242.16	239.464	224.164	192.952	224.207	142.285	576.419	338.202	353.238	1312.65	1295.98	1089.99	127.14	150.616	154.142	205.932	143.526	218.126	369.445	228.306
pgaptmp_003701	pgaptmp_003701	pgaptmp_003701	protein_coding	protein_coding	pgaptmp_003701	0.4438	1485				TRUE	-2.40432	3.23154e-07	6.09591e-06	Chromosome_II	459933	461417	1485	-	13.6117	14152.6	19696.1	20992.6	25677.5	23924.2	32010.3	39255.2	36049.2	32332.8	3662.68	4466.37	4283.19	4443.78	3848.15	4600.55	6116.45	5061.05	9024.11	27755.5	24868.9	19917.2	392.706	548.146	590.038	931.517	833.019	1055.11	1258.65	1054.89
pgaptmp_005219	pgaptmp_005219	pgaptmp_005219	protein_coding	protein_coding	pgaptmp_005219	0.4808	468				TRUE	-4.28829	3.25879e-07	6.12537e-06	Chromosome_II	2190337	2190804	468	-	8.11879	2618.05	1901.93	1694.11	1468.92	1774.41	757.87	1521.3	3108.33	2739.03	14.126	30.8401	27.7889	39.7687	27.7484	48.7458	18.5398	27.9616	26.4598	568.31	1105.47	1227.06	230.511	167.954	151.09	169.089	196.044	79.2651	154.775	288.615
pgaptmp_001940	pgaptmp_001940	pgaptmp_001940	protein_coding	protein_coding	pgaptmp_001940	0.4689	1239		GO:0030554,GO:0046872		TRUE	-2.4184	3.35432e-07	6.26093e-06	Chromosome_I	2091836	2093074	1239	-	8.81117	1325.22	1252.41	1163.98	995.506	1020	557.476	867.19	969.441	1020.45	171.53	143.316	148.207	148.764	195.349	125.158	190.454	166.438	148.175	890.743	999.063	901.398	44.0731	41.7749	39.2118	43.2849	42.5669	22.0236	33.3254	34.0007
pgaptmp_000006	pgaptmp_000006	pgaptmp_000006	protein_coding	protein_coding	pgaptmp_000006	0.4864	1254		GO:0030170		TRUE	1.83931	3.35471e-07	6.26093e-06	Chromosome_I	7249	8502	1254	-	10.9874	1894.93	2004.03	1710.44	1393.32	1425.54	1335.14	1183.48	1604.54	1499.71	2235.95	2416.41	2510.26	4814.95	3772.67	4312.03	2634.34	3113.06	3234.71	1198.65	1266.67	1352.51	62.2664	66.0461	56.9314	59.8575	58.7794	52.1149	44.9361	55.602
pgaptmp_000630	pgaptmp_000630	gluQRS	protein_coding	protein_coding	pgaptmp_000630	0.4576	885	GO:0043039	GO:0004812		TRUE	1.58633	3.37799e-07	6.26487e-06	Chromosome_I	637362	638246	885	-	11.4426	2026.76	2249.58	2401.48	1604.72	1571.64	2085.59	2112.29	1911.27	1806.55	3951.25	2937.06	3747.79	5292.18	5717.28	5600.5	4633.26	4255.49	4720.42	1997.75	1947.79	1917.44	94.3662	105.051	113.26	97.6835	91.8237	115.35	113.643	93.846
pgaptmp_002865	pgaptmp_002865	nudF	protein_coding	protein_coding	pgaptmp_002865	0.4485	651		GO:0016787,GO:0046872		TRUE	1.60562	3.38063e-07	6.26487e-06	Chromosome_I	3113754	3114404	651	-	11.8018	4099.77	4192	3803.98	2631.62	3023.13	2161.46	2600.83	2896.38	2929.05	3688.91	3347.05	3603.29	7544.26	8222.41	8048.33	2716.92	3295.48	3836.67	2731.46	2721.94	2852.9	259.499	266.122	243.892	217.774	240.115	162.517	190.223	193.336
pgaptmp_003408	pgaptmp_003408	pgaptmp_003408	protein_coding	protein_coding	pgaptmp_003408	0.4803	585		GO:0009055,GO:0010181		TRUE	1.87464	3.41465e-07	6.29608e-06	Chromosome_II	151280	151864	585	-	7.71783	109.471	113.535	93.1187	112.106	104.458	121.226	99.4893	82.8391	99.9338	443.961	776.444	529.841	427.145	354.07	372.839	586.532	853.495	668.109	94.4389	108.317	112.986	7.71084	8.02077	6.64388	10.3238	9.23269	10.1432	8.09754	6.15342
pgaptmp_004893	pgaptmp_004893	pgaptmp_004893	protein_coding	protein_coding	pgaptmp_004893	0.4464	513	GO:0015031		GO:0005886	TRUE	-2.38762	3.42543e-07	6.29608e-06	Chromosome_II	1829743	1830255	513	+	7.951	324.558	311.561	334.084	492.628	451.967	294.407	266.542	280.608	259.687	171.53	214.066	179.701	98.6852	129.863	105.396	119.666	111.846	116.423	759.423	532.026	686.225	26.0696	25.0997	27.1818	51.7328	45.5547	28.0907	24.739	23.7695
pgaptmp_005006	pgaptmp_005006	pgaptmp_005006	protein_coding	protein_coding	pgaptmp_005006	0.4465	477				TRUE	1.85864	3.43336e-07	6.29608e-06	Chromosome_II	1959516	1959992	477	+	8.12718	142.621	148.74	149.48	175.527	183.654	203.693	213.828	202.993	205.498	486.339	424.504	414.98	570.018	683.721	675.854	411.246	410.104	517.289	181.613	196.244	167.818	12.3203	12.887	13.0799	19.8239	19.9079	20.9021	21.3441	18.4927
pgaptmp_004643	pgaptmp_004643	pgaptmp_004643	protein_coding	protein_coding	pgaptmp_004643	0.3338	2037				TRUE	-3.06263	3.52582e-07	6.4432e-06	Chromosome_II	1552797	1554833	2037	-	11.1995	4896.9	7077.02	6888.33	7411.2	7770.83	8598.82	8229.4	7182.37	8046.79	445.979	511.582	372.371	606.84	507.241	376.792	1289.36	1014.61	990.919	5469.08	4300.81	3660.42	99.0578	143.582	141.145	196.003	197.251	206.624	192.358	153.22
pgaptmp_001726	pgaptmp_001726	pgaptmp_001726	protein_coding	protein_coding	pgaptmp_001726	0.4547	453				TRUE	-1.8887	3.56024e-07	6.48358e-06	Chromosome_I	1822590	1823042	453	-	8.38001	564.315	600.24	686.955	550.923	614.456	677.053	622.922	561.962	544.006	320.863	460.787	402.012	119.306	96.5645	117.253	112.924	107.852	89.9633	466.606	417.338	498.469	51.3313	54.7606	63.2952	65.5175	70.1353	73.1572	65.4739	53.9072
pgaptmp_001167	pgaptmp_001167	pgaptmp_001167	protein_coding	protein_coding	pgaptmp_001167	0.4939	2385		GO:1904047		TRUE	1.74532	3.61452e-07	6.55163e-06	Chromosome_I	1241653	1244037	2385	-	11.6452	2838.54	2558.5	2824.6	1376.03	1512.93	1804.37	1772.99	1848.58	1974.05	7422.22	6866.45	7734.57	6411.59	7015.91	7178.81	3623.69	4296.77	4086.71	2133.54	1957.98	2433.36	49.0416	44.3342	49.4322	31.0816	32.8	37.0315	35.3957	33.6812
pgaptmp_002183	pgaptmp_002183	pgaptmp_002183	protein_coding	protein_coding	pgaptmp_002183	0.4414	981				TRUE	-1.85612	3.62251e-07	6.55163e-06	Chromosome_I	2363991	2364971	981	-	11.0689	3759.02	3206.27	3294.28	2447.77	2480.36	2291.75	2378.09	2597.86	2606.73	1759.7	2115.27	2004.5	820.413	986.733	931.44	1580.94	1709.65	1570.39	3451.21	3142.46	4037.6	157.893	135.074	140.163	134.42	130.734	114.349	115.423	115.076
pgaptmp_005005	pgaptmp_005005	pgaptmp_005005	protein_coding	protein_coding	pgaptmp_005005	0.4606	927				TRUE	2.21965	3.65526e-07	6.58824e-06	Chromosome_II	1958549	1959475	927	+	8.38176	218.942	164.582	178.886	187.058	187.751	164.109	187.842	225.382	232.241	661.905	491.627	611.355	733.511	1084.41	993.36	482.035	568.553	645.619	196.142	198.156	227.634	9.73212	7.33743	8.05448	10.8708	10.4724	8.66534	9.64817	10.5652
pgaptmp_002703	pgaptmp_002703	queA	protein_coding	protein_coding	pgaptmp_002703	0.4663	1053	GO:0006400,GO:0008616	GO:0051075	GO:0005737	TRUE	1.87879	3.70444e-07	6.65089e-06	Chromosome_I	2925987	2927039	1053	-	11.5934	2749.88	2396.56	2292.84	1367.7	1869.31	1348.33	1246.59	1685.89	1595.42	5866.34	5968.46	6311.78	7202.55	6208.98	7206.47	5627.67	5987.78	5994.46	1829.54	1832.46	2290.46	107.608	94.0592	90.8839	69.9724	91.7905	62.676	56.3672	69.5725
pgaptmp_000759	pgaptmp_000759	recC	protein_coding	protein_coding	pgaptmp_000759	0.4791	3477		GO:0008854	GO:0009338	TRUE	1.89347	3.7153e-07	6.65089e-06	Chromosome_I	798976	802452	3477	+	12.0392	3847.68	3413.09	3570.37	2072.37	2474.21	1967.66	2775.31	3386.7	3232.37	4247.9	4702.2	4672.23	10012.9	8999.36	9426.38	6761.97	6997.06	12080.2	2320.18	2792.02	3019.89	45.5986	40.5681	42.8597	32.109	36.7939	27.6999	38.0048	42.3262
pgaptmp_004790	pgaptmp_004790	pgaptmp_004790	protein_coding	protein_coding	pgaptmp_004790	0.4074	135				TRUE	-1.70797	3.75256e-07	6.68651e-06	Chromosome_II	1715107	1715241	135	-	10.3389	666.077	967.248	744.133	1707.22	1233.69	2549.88	2124.17	1033.62	1277.32	1999.84	1378.73	1932.25	836.615	811.363	720.647	1061.82	900.098	592.699	2901.34	2756.34	2631.92	203.305	296.105	230.069	681.272	472.516	924.523	749.184	332.71
pgaptmp_005290	pgaptmp_005290	ompW	protein_coding	protein_coding	pgaptmp_005290	0.431	645			GO:0019867	TRUE	-2.44269	3.78368e-07	6.68651e-06	Chromosome_II	2277464	2278108	645	-	7.04872	171.916	227.95	260.569	495.19	402.128	482.431	422.458	361.954	332.174	42.3781	36.2824	35.1992	47.1332	32.1882	30.3014	55.6194	57.2548	46.3046	277.17	230.651	239.265	10.9828	14.6057	16.8618	41.3596	32.2365	36.6107	31.1858	24.3855
pgaptmp_000512	pgaptmp_000512	proC	protein_coding	protein_coding	pgaptmp_000512	0.4908	819	GO:0006561	GO:0004735		TRUE	1.74549	3.78575e-07	6.68651e-06	Chromosome_I	521541	522359	819	-	10.3702	1100.88	1093.11	1164.8	729.013	787.87	591.287	805.566	938.096	952.187	2161.28	2026.37	2143.45	2562.87	3010.15	3123.68	1508.46	1812.18	2205.42	834.862	914.321	991.953	55.3877	55.1594	59.362	47.9529	49.741	35.3384	46.8328	49.7738
pgaptmp_001209	pgaptmp_001209	yfaE	protein_coding	protein_coding	pgaptmp_001209	0.4373	279		GO:0051537		TRUE	1.87879	3.78816e-07	6.68651e-06	Chromosome_I	1288854	1289132	279	-	11.2322	1584.25	1855.29	1692.47	1447.13	1327.23	1575.12	1565.84	1800.82	1611.61	3531.51	2532.51	3438.41	6345.31	5543.02	5107.77	4125.95	4115.68	3613.08	1754.11	1492.22	1653.26	233.979	274.82	253.197	279.427	245.971	276.338	267.225	280.481
pgaptmp_002738	pgaptmp_002738	clpB	protein_coding	protein_coding	pgaptmp_002738	0.4472	2574	GO:0009408,GO:0042026	GO:0005524,GO:0016887		TRUE	2.65295	3.79872e-07	6.68651e-06	Chromosome_I	2962905	2965478	2574	-	12.8305	8485.55	7111.34	5852.59	3634.17	4324.41	2558.12	4320.36	6980.12	6189.56	9708.62	8154.48	9598.27	24728.7	24017.9	21387.5	8607.52	9719.99	10308.7	2963.93	3979.68	4930.69	135.841	114.179	94.9032	76.0609	86.8684	48.6458	79.9179	117.84
pgaptmp_000644	pgaptmp_000644	pgaptmp_000644	protein_coding	protein_coding	pgaptmp_000644	0.4724	2409				TRUE	2.21167	3.8698e-07	6.78892e-06	Chromosome_I	657835	660243	2409	-	8.50867	440.197	328.284	301.411	199.229	263.534	170.706	148.491	311.952	264.614	339.025	357.382	398.307	951.502	800.264	894.551	724.737	856.158	812.315	173.79	169.484	245.911	7.52954	5.63189	5.22231	4.45534	5.65644	3.46853	2.93493	5.62716
pgaptmp_000340	pgaptmp_000340	pgaptmp_000340	protein_coding	protein_coding	pgaptmp_000340	0.4632	231				TRUE	2.16386	4.06431e-07	7.10647e-06	Chromosome_I	357743	357973	231	+	6.8463	56.2774	55.4474	57.1782	70.4669	68.2729	60.2008	50.4871	32.8371	46.4481	165.476	168.713	201.932	297.529	369.609	320.141	407.875	364.833	365.145	81.0275	72.6359	58.9855	10.0388	9.91997	10.3314	16.4338	15.282	12.7563	10.4064	6.17718
pgaptmp_003003	pgaptmp_003003	hslV	protein_coding	protein_coding	pgaptmp_003003	0.4928	552	GO:0051603	GO:0004298	GO:0009376	TRUE	2.65633	4.1042e-07	7.15245e-06	Chromosome_I	3250879	3251430	552	+	12.2849	4225.43	3717.61	3099.06	2573.32	2814.21	1368.13	2337.26	3612.83	3228.85	7125.57	5935.81	6943.51	14808.7	16795.6	17266.6	10210.4	10628.1	13117.4	2094.98	2572.2	3579.01	315.42	278.334	234.332	251.142	263.61	121.316	201.604	284.411
pgaptmp_002110	pgaptmp_002110	pgaptmp_002110	protein_coding	protein_coding	pgaptmp_002110	0.5009	3162		GO:0015562		TRUE	2.60778	4.15725e-07	7.221e-06	Chromosome_I	2290727	2293888	3162	-	12.9934	6836.54	5304.46	5918.76	2869.93	3563.16	3945.21	4479.99	5762.91	5391.5	15423.6	19993.4	17210.6	25366.5	16604.6	17588	15015.5	17698.4	26507.4	3535.59	3105.5	3748.49	89.0908	69.33	78.1285	48.896	58.2664	61.0719	67.4602	79.1986
pgaptmp_002959	pgaptmp_002959	pgaptmp_002959	protein_coding	protein_coding	pgaptmp_002959	0.4574	1725	GO:0055085		GO:0016020	TRUE	2.50329	4.25967e-07	7.37455e-06	Chromosome_I	3218389	3220113	1725	-	8.36264	216.629	216.509	191.138	167.839	159.076	186.375	208.631	201.5	192.83	603.383	464.415	477.968	1075.23	683.721	815.504	738.221	1107.81	793.793	135.232	151.643	175.295	5.17471	5.18714	4.62487	5.24166	4.76825	5.28849	5.75866	5.07603
pgaptmp_003726	pgaptmp_003726	pgaptmp_003726	protein_coding	protein_coding	pgaptmp_003726	0.4735	264				TRUE	1.89439	4.29193e-07	7.38442e-06	Chromosome_II	485729	485992	264	+	10.5533	267.51	362.608	360.222	871.868	740.761	1408.53	795.914	507.483	601.714	3622.32	4455.48	4322.09	3807.48	3498.52	3682.28	6913.66	4998.47	5022.07	1214.85	919.418	987.799	41.7537	56.7643	56.9518	177.914	145.084	261.154	143.547	83.5323
pgaptmp_003267	pgaptmp_003267	pgaptmp_003267	protein_coding	protein_coding	pgaptmp_003267	0.4471	747				TRUE	2.17402	4.29343e-07	7.38442e-06	Chromosome_I	3533734	3534480	747	-	12.0153	2258.03	2580.5	2758.44	1516.32	1506.78	2211.76	2521.39	2023.21	1976.16	14594.2	12965.5	14859.6	10669.8	8706.34	10156.3	7159.73	8817.23	5441.45	2692.91	2244.71	1990.55	124.557	142.766	154.129	109.354	104.298	144.927	160.713	117.695
pgaptmp_000001	pgaptmp_000001	dnaA	protein_coding	protein_coding	pgaptmp_000001	0.4776	1407	GO:0006270,GO:0006275	GO:0003677,GO:0003688,GO:0005524		TRUE	2.03528	4.31853e-07	7.4034e-06	Chromosome_I	1	1407	1407	+	12.4604	5755.71	4211.36	4083.34	2989.08	3774.81	2375.05	2714.42	3592.68	3695.44	8544.23	8455.62	9476	12980.8	14648.9	15463	7151.3	8771.96	9636.65	3275.75	3481.43	4420.59	168.563	123.7	121.133	114.448	138.722	82.6248	91.8579	110.959
pgaptmp_002230	pgaptmp_002230	cmoM	protein_coding	protein_coding	pgaptmp_002230	0.4331	792				TRUE	1.55452	4.35587e-07	7.4261e-06	Chromosome_I	2416562	2417353	792	-	11.257	1790.08	1811.28	1904.85	1354.25	1459.68	1411.01	1493.82	1584.39	1510.97	4443.64	4903.57	5341.02	4186.02	4085.68	4526.77	3996.17	4003.84	4463.77	1521.08	1444.44	1653.26	93.1335	94.5153	100.387	92.1164	95.2961	87.2041	89.8063	86.931
pgaptmp_000893	pgaptmp_000893	fliF	protein_coding	protein_coding	pgaptmp_000893	0.4951	1743	GO:0001539	GO:0005198	GO:0009431	TRUE	1.86564	4.36644e-07	7.4261e-06	Chromosome_I	940256	941998	1743	+	11.3698	2247.24	2118.44	2256.9	1344	1491.08	1534.71	1320.83	1548.57	1505.34	4463.82	5384.31	5166.88	5776.77	4719.45	5186.82	4618.09	4861.33	5342.23	1489.79	1350.14	1725.53	53.1264	50.2297	54.0451	41.5399	44.2331	43.0984	36.0814	38.6074
pgaptmp_004609	pgaptmp_004609	pgaptmp_004609	protein_coding	protein_coding	pgaptmp_004609	0.469	6198		GO:0003676,GO:0005524		TRUE	2.53259	4.3741e-07	7.4261e-06	Chromosome_II	1501476	1507673	6198	-	11.8552	3200.1	2395.68	2516.66	1774.49	2184.73	1849.73	2551.83	3493.42	3294.3	5018.77	5121.27	4281.34	9563.63	9465.54	6834.95	9684.51	9799.88	8680.13	1305.94	1554.66	1887.54	21.275	15.9742	16.9478	15.4236	18.226	14.608	19.6034	24.4927
pgaptmp_001558	pgaptmp_001558	pgaptmp_001558	protein_coding	protein_coding	pgaptmp_001558	0.4396	207				TRUE	-2.57223	4.39085e-07	7.43056e-06	Chromosome_I	1616767	1616973	207	-	7.16183	449.448	518.389	531.757	320.945	258.072	324.919	602.133	351.506	410.996	52.4681	32.6542	48.1674	35.3499	38.8478	38.2062	30.3378	65.2438	27.7828	323.551	305.836	211.018	89.4679	103.497	107.222	83.5265	64.4635	76.8313	138.502	73.7905
pgaptmp_003368	pgaptmp_003368	pgaptmp_003368	protein_coding	protein_coding	pgaptmp_003368	0.4508	792		GO:0003677		TRUE	2.25037	4.49399e-07	7.58073e-06	Chromosome_II	104219	105010	792	-	6.84023	82.4887	40.4854	45.7425	76.2324	69.6384	51.9541	68.3061	116.422	99.2301	102.918	81.6355	101.893	297.529	415.116	350.443	264.613	260.975	439.232	59.7927	80.2818	77.2627	4.29168	2.11259	2.41066	5.18536	4.5464	3.21091	4.10645	6.38777
pgaptmp_000081	pgaptmp_000081	pgaptmp_000081	protein_coding	protein_coding	pgaptmp_000081	0.4919	1551				TRUE	1.95928	4.5122e-07	7.58712e-06	Chromosome_I	89008	90558	1551	-	9.37313	632.928	461.181	474.579	304.289	377.549	281.212	325.196	307.475	353.991	1004.97	925.202	965.2	1540.67	1931.29	1839.17	1109.02	1268.93	1471.16	459.901	416.701	559.116	16.8151	12.2886	12.7714	10.5691	12.5865	8.87472	9.98313	8.6146
pgaptmp_001998	pgaptmp_001998	pgaptmp_001998	protein_coding	protein_coding	pgaptmp_001998	0.4671	1032	GO:0006810	GO:0005215	GO:0016020	TRUE	2.31453	4.57087e-07	7.6557e-06	Chromosome_I	2165015	2166046	1032	-	9.54899	1135.57	879.237	832.351	404.865	494.979	266.368	468.491	620.92	624.235	1178.51	845.381	1007.81	1845.56	2245.4	1965.64	667.432	806.893	862.589	325.786	438.364	513.423	45.3411	35.2101	33.6641	21.1346	24.8	12.6338	21.6149	26.1453
pgaptmp_003810	pgaptmp_003810	pgaptmp_003810	protein_coding	protein_coding	pgaptmp_003810	0.4546	3159		GO:0022857	GO:0016020	TRUE	1.63118	4.58207e-07	7.6557e-06	Chromosome_II	564688	567846	3159	+	10.1051	566.628	719.055	674.702	885.962	901.886	935.999	952.573	997.054	924.036	1487.27	1249.93	1450.58	2568.76	2457.4	2186.97	1203.4	1264.93	1322.99	846.597	803.455	809.181	7.39106	9.40707	8.91463	15.1088	14.762	14.503	14.3576	13.7153
pgaptmp_004798	pgaptmp_004798	pgaptmp_004798	protein_coding	protein_coding	pgaptmp_004798	0.4762	672			GO:0005886,GO:0016020	TRUE	-2.01433	4.60174e-07	7.66423e-06	Chromosome_II	1722895	1723566	672	+	9.71334	1161.01	1491.8	1639.38	2016.64	1772.37	1821.69	1807.14	1500.8	1509.56	381.403	388.222	455.737	310.785	288.583	358.347	342.143	398.12	411.45	1334.44	1608.82	1242.85	71.1909	91.745	101.824	161.667	136.373	132.69	128.043	97.0493
pgaptmp_002050	pgaptmp_002050	pgaptmp_002050	protein_coding	protein_coding	pgaptmp_002050	0.4606	1257				TRUE	2.75021	4.6283e-07	7.68415e-06	Chromosome_I	2215480	2216736	1257	-	9.04516	457.157	301.88	414.133	206.917	241.003	195.446	256.148	341.058	303.32	649.797	1505.72	922.59	1844.09	1153.22	1396.5	974.182	2222.28	1545.25	219.054	262.509	188.587	14.9861	9.92524	13.7514	8.86797	9.91361	7.61071	9.7026	11.7905
pgaptmp_004710	pgaptmp_004710	betA	protein_coding	protein_coding	pgaptmp_004710	0.4979	1701	GO:0019285	GO:0008812		TRUE	2.39084	4.65619e-07	7.70614e-06	Chromosome_II	1626417	1628117	1701	-	6.82135	53.1937	50.1667	40.8415	56.3736	70.3211	34.6361	48.2597	79.8539	54.1895	211.89	244.906	218.606	299.001	336.311	293.792	396.077	338.202	444.524	55.3222	41.4152	71.4472	1.28859	1.21886	1.00216	1.7854	2.1376	0.996683	1.35087	2.03999
pgaptmp_002016	pgaptmp_002016	torC	protein_coding	protein_coding	pgaptmp_002016	0.4473	1185		GO:0005506,GO:0009055,GO:0020037	GO:0009276,GO:0016020	TRUE	-2.14966	4.70852e-07	7.76832e-06	Chromosome_I	2184598	2185782	1185	-	8.97579	1594.27	1431.95	1324.08	623.312	642.448	343.062	980.044	1284.38	1235.8	280.502	286.631	277.889	184.114	190.909	193.666	205.623	198.394	170.666	746.012	892.657	1144.82	55.4372	49.9403	46.6378	28.3368	28.0326	14.1706	39.3786	47.099
pgaptmp_001605	pgaptmp_001605	pgaptmp_001605	protein_coding	protein_coding	pgaptmp_001605	0.4873	981	GO:0055085	GO:0022857	GO:0016020	TRUE	2.70798	4.75794e-07	7.82533e-06	Chromosome_I	1674913	1675893	981	-	6.33373	43.9426	65.1286	44.1089	40.3583	38.2328	26.3894	40.8352	36.5686	29.5579	516.609	522.467	490.937	268.07	198.679	164.682	109.553	125.162	112.454	31.8522	22.9377	24.9234	1.84576	2.74375	1.87671	2.2163	2.01517	1.31672	1.98197	1.61986
pgaptmp_000812	pgaptmp_000812	pgaptmp_000812	protein_coding	protein_coding	pgaptmp_000812	0.4511	450				TRUE	-1.91658	4.78945e-07	7.85261e-06	Chromosome_I	858278	858727	450	-	9.82293	1377.64	1622.94	1668.79	1669.43	1285.58	1483.58	1765.56	1346.32	1558.12	520.645	471.672	453.885	428.618	529.44	513.807	276.411	299.589	328.101	2265.98	1879.61	1833.53	126.148	149.049	154.785	199.857	147.717	161.373	186.811	130.009
pgaptmp_001604	pgaptmp_001604	pgaptmp_001604	protein_coding	protein_coding	pgaptmp_001604	0.4773	1188		GO:0042626,GO:0140359		TRUE	2.42232	4.82865e-07	7.8923e-06	Chromosome_I	1673707	1674894	1188	-	6.64244	62.4447	59.8479	73.5148	43.5614	57.3493	47.8308	51.2296	53.7334	54.8932	569.077	624.058	548.367	273.962	289.693	189.713	84.2718	85.2164	92.6092	44.7048	44.601	38.2159	2.1659	2.08197	2.58285	1.97537	2.49606	1.97071	2.05323	1.96547
pgaptmp_001919	pgaptmp_001919	cydD	protein_coding	protein_coding	pgaptmp_001919	0.4726	1788	GO:0042883	GO:0005524,GO:0140359	GO:0016020	TRUE	1.69309	4.92066e-07	8.01778e-06	Chromosome_I	2064885	2066672	1788	+	11.1922	2413.76	2007.55	1996.33	1140.92	1414.62	1043.21	1109.97	1622.45	1482.82	4603.07	5518.56	5048.31	4641.15	4680.6	4732.29	2600.63	3159.66	3333.93	1411.55	1416.4	1784.52	55.6269	46.4023	46.6022	34.3758	40.9086	28.5585	29.5582	39.4314
pgaptmp_001545	pgaptmp_001545	pgaptmp_001545	protein_coding	protein_coding	pgaptmp_001545	0.4626	1656				TRUE	-2.27212	4.95102e-07	8.03466e-06	Chromosome_I	1601549	1603204	1656	-	7.68379	620.593	760.421	740.049	470.847	477.228	386.77	423.201	430.614	463.074	68.6121	58.0519	46.3148	63.3353	91.0148	61.9203	69.1029	50.5972	80.7023	360.433	424.984	435.329	15.442	18.9773	18.6527	15.3174	14.9008	11.4321	12.168	11.2997
pgaptmp_004152	pgaptmp_004152	tssA	protein_coding	protein_coding	pgaptmp_004152	0.4569	1578				TRUE	-2.19819	4.96155e-07	8.03466e-06	Chromosome_II	989039	990616	1578	+	7.4582	110.242	99.4532	96.386	181.933	187.751	183.901	227.192	258.219	270.244	135.206	156.014	124.124	103.104	134.302	100.126	133.149	139.808	88.6403	505.723	558.787	687.887	2.87871	2.60467	2.54946	6.2111	6.15203	5.7044	6.85518	7.1108
pgaptmp_000097	pgaptmp_000097	pgaptmp_000097	protein_coding	protein_coding	pgaptmp_000097	0.4684	585			GO:0016020	TRUE	-2.56747	4.97852e-07	8.03741e-06	Chromosome_I	103222	103806	585	+	11.6949	6071.79	9101.29	10212.8	7018.51	6309.79	7459.13	7979.93	6918.93	6777.2	1043.31	892.548	985.578	1109.1	914.588	1134.33	1783.19	1505.93	1525.41	7652.91	7335.59	4985.52	427.68	642.967	728.671	646.328	557.703	624.115	649.495	513.949
pgaptmp_001247	pgaptmp_001247	pgaptmp_001247	protein_coding	protein_coding	pgaptmp_001247	0.4167	300				TRUE	-2.234	4.99443e-07	8.03844e-06	Chromosome_I	1333656	1333955	300	-	11.5355	5196.79	5248.14	5840.34	3725.14	2698.15	3140.34	5315.25	4015.08	4375.98	1616.42	1765.14	1185.66	589.165	887.949	853.71	6820.96	3768.16	7600.57	4092.73	3992.43	3664.58	713.793	722.979	812.564	668.937	465.038	512.375	843.598	581.582
pgaptmp_001716	pgaptmp_001716	cobB	protein_coding	protein_coding	pgaptmp_001716	0.4495	732		GO:0070403		TRUE	-2.2624	5.02622e-07	8.06494e-06	Chromosome_I	1812993	1813724	732	-	9.26301	1299.78	1542.84	1768.44	1283.14	1116.95	1198.24	2057.35	1691.86	1747.43	199.782	221.323	220.458	145.818	234.197	193.666	220.792	242.334	259.306	998.035	1053.22	983.645	73.1671	87.107	100.837	94.4337	78.8978	80.1248	133.823	100.436
pgaptmp_002013	pgaptmp_002013	pgaptmp_002013	protein_coding	protein_coding	pgaptmp_002013	0.4466	909	GO:0030001	GO:0046872		TRUE	-1.75071	5.05888e-07	8.09266e-06	Chromosome_I	2179111	2180019	909	-	8.72974	688.434	642.485	693.489	491.347	478.593	422.23	680.091	677.638	622.123	308.755	361.01	329.761	190.006	218.657	185.761	215.736	209.046	334.716	658.837	774.146	760.996	31.2073	29.2106	31.8432	29.1198	27.2237	22.7362	35.6234	32.3945
pgaptmp_000439	pgaptmp_000439	lptF	protein_coding	protein_coding	pgaptmp_000439	0.4587	1101	GO:0055085	GO:0015221	GO:0043190	TRUE	1.52019	5.11515e-07	8.13595e-06	Chromosome_I	474355	475455	1101	+	11.7438	3006.6	2809.33	3055.76	2138.99	2298.07	2265.36	2466.44	2671	2518.76	5646.37	5456.88	5963.49	6659.04	6086.89	6450.25	3591.66	4069.08	3886.94	2392.83	2310.97	2397.64	112.524	105.453	115.844	104.661	107.924	100.713	106.664	105.42
pgaptmp_000221	pgaptmp_000221	pgaptmp_000221	protein_coding	protein_coding	pgaptmp_000221	0.464	375				TRUE	1.98575	5.11685e-07	8.13595e-06	Chromosome_I	239550	239924	375	+	9.56644	655.284	690.892	616.707	493.269	557.79	523.665	532.342	564.201	605.937	686.121	731.091	833.666	2154.87	1661.57	1778.56	991.036	1146.43	1098.08	427.49	537.124	519.238	72.004	76.1413	68.6418	70.8625	76.9101	68.3525	67.5915	65.3793
pgaptmp_002805	pgaptmp_002805	arcA	protein_coding	protein_coding	pgaptmp_002805	0.4658	717				TRUE	-1.86655	5.15988e-07	8.17966e-06	Chromosome_I	3038466	3039182	717	+	14.1415	27731.6	33533.3	35697.1	37423.7	33685.9	24448.1	36791	36596.2	37119.1	9014.42	9433.43	8701.62	7894.82	9274.63	9349.97	6236.11	6180.85	6204.82	33281.1	35894.9	33674.1	1593.73	1932.85	2078.05	2811.85	2429.25	1669.01	2443.18	2217.96
pgaptmp_000393	pgaptmp_000393	mreC	protein_coding	protein_coding	pgaptmp_000393	0.4736	891	GO:0008360			TRUE	1.72025	5.2836e-07	8.35063e-06	Chromosome_I	426150	427040	891	+	11.8644	2706.71	2623.63	2631.83	2299.78	2676.98	1952.82	1788.58	2233.67	2320.3	5377.98	5549.4	6435.9	7946.37	6922.67	7779.57	7181.64	7010.38	8135.06	2157.57	2540.98	2597.85	125.176	121.693	123.288	139.051	155.35	107.279	95.5792	108.938
pgaptmp_002425	pgaptmp_002425	sucD	protein_coding	protein_coding	pgaptmp_002425	0.457	873		GO:0003824		TRUE	1.75197	5.31594e-07	8.37658e-06	Chromosome_I	2638694	2639566	873	-	10.0006	975.988	842.272	844.603	559.251	608.995	585.515	590.254	747.79	693.907	1426.73	1404.13	1493.19	1981.07	2082.24	1924.8	1714.09	1730.96	2268.93	534.781	625.051	716.134	46.0669	39.8731	40.3812	34.511	36.0697	32.8289	32.1927	37.2223
pgaptmp_004818	pgaptmp_004818	pgaptmp_004818	protein_coding	protein_coding	pgaptmp_004818	0.4537	540		GO:0016209,GO:0016491		TRUE	-1.94397	5.37744e-07	8.4482e-06	Chromosome_II	1747639	1748178	540	+	8.66918	593.611	721.696	812.747	894.93	658.834	857.655	1412.9	1121.69	1213.99	179.602	156.014	129.681	167.912	134.302	192.348	112.924	187.742	153.467	719.189	663.281	712.81	45.2966	55.2334	62.8206	89.2811	63.085	77.7413	124.58	90.2641
pgaptmp_001114	pgaptmp_001114	pgaptmp_001114	protein_coding	protein_coding	pgaptmp_001114	0.4349	453				TRUE	-3.03607	5.52981e-07	8.65918e-06	Chromosome_I	1185501	1185953	453	-	9.20181	1070.04	1694.22	1587.92	1909.01	1909.59	1946.22	1383.94	1116.46	1225.95	183.638	186.855	194.522	175.277	204.228	154.142	166.858	138.477	109.808	2133.54	1527.27	1179.71	97.3331	154.566	146.309	227.026	217.965	210.294	145.463	107.098
pgaptmp_004274	pgaptmp_004274	pgaptmp_004274	protein_coding	protein_coding	pgaptmp_004274	0.4711	1074	GO:0055085	GO:0022857,GO:0042802	GO:0016020	TRUE	2.17289	5.54464e-07	8.65918e-06	Chromosome_II	1123854	1124927	1074	+	7.94015	164.207	108.254	110.272	87.7634	96.9476	69.2722	58.6541	106.721	101.341	809.219	1095.73	942.969	521.411	617.125	603.394	867.999	916.076	682.662	107.85	119.148	165.326	6.30006	4.16565	4.28551	4.40224	4.66742	3.15709	2.60032	4.31799
pgaptmp_001899	pgaptmp_001899	pgaptmp_001899	protein_coding	protein_coding	pgaptmp_001899	0.4429	1707				TRUE	-1.46633	5.63987e-07	8.78184e-06	Chromosome_I	2041254	2042960	1707	+	11.811	9849.31	10269.2	9857.51	6660.41	6448.38	4205.81	7037.01	9243.65	8103.79	1715.3	1681.69	1754.4	1736.57	1650.48	1663.94	1105.65	1143.76	1293.88	4767.21	4987.03	5142.54	237.755	248.625	241.032	210.199	195.326	120.6	196.285	235.314
pgaptmp_002346	pgaptmp_002346	lon	protein_coding	protein_coding	pgaptmp_002346	0.4566	2352	GO:0006508	GO:0004176,GO:0004252,GO:0016887,GO:0043565		TRUE	2.60961	5.69048e-07	8.83451e-06	Chromosome_I	2549019	2551370	2352	-	14.034	16119.2	13354	11291.9	8527.14	11341.5	5566.51	7463.92	12410.2	11052.5	31230.6	29561.1	32464.8	54072.1	53164.8	48093.7	22487.1	23845.9	25298.2	7379.65	7902.66	11865.2	282.4	234.648	200.387	195.313	249.331	115.845	151.099	229.286
pgaptmp_002084	pgaptmp_002084	pgaptmp_002084	protein_coding	protein_coding	pgaptmp_002084	0.4608	879		GO:0050661,GO:0051287		TRUE	-1.96999	5.70859e-07	8.83487e-06	Chromosome_I	2256789	2257667	879	+	9.53475	1636.67	1958.26	2094.35	1008.96	849.315	1142.17	2508.02	1985.15	1871.3	252.25	239.464	289.004	243.031	239.746	274.03	455.068	384.805	500.09	997.476	1269.22	957.891	76.7238	92.0711	99.4494	61.837	49.9602	63.6023	135.855	98.1392
pgaptmp_002048	pgaptmp_002048	pgaptmp_002048	protein_coding	protein_coding	pgaptmp_002048	0.4478	594		GO:0016872		TRUE	3.19066	5.73525e-07	8.83487e-06	Chromosome_I	2214408	2215001	594	-	8.01221	164.977	136.418	145.396	105.7	103.092	97.3109	86.125	116.422	110.49	375.349	908.875	500.2	1474.39	733.668	1114.57	453.382	983.983	649.588	124.056	132.529	105.509	11.4445	9.49133	10.2166	9.58638	8.97394	8.01877	6.9036	8.51702
pgaptmp_003526	pgaptmp_003526	pgaptmp_003526	protein_coding	protein_coding	pgaptmp_003526	0.4283	600	GO:0006355	GO:0003677,GO:0003700		TRUE	-2.47158	5.74107e-07	8.83487e-06	Chromosome_II	279651	280250	600	-	10.0033	1010.68	1549.01	1493.17	2218.43	2063.89	2671.1	2607.51	1888.13	1903.67	435.889	400.921	437.211	340.243	456.184	389.966	519.114	440.728	465.692	2953.31	2202.02	1956.49	69.4098	106.695	103.872	199.186	177.86	217.907	206.922	136.747
pgaptmp_003009	pgaptmp_003009	pgaptmp_003009	protein_coding	protein_coding	pgaptmp_003009	0.4748	615		GO:0003677		TRUE	1.44365	5.79817e-07	8.84718e-06	Chromosome_I	3257425	3258039	615	+	9.65281	729.293	768.342	748.217	531.705	512.73	490.678	553.131	579.873	551.747	1150.26	990.51	1315.34	1481.75	1553.91	1480.82	1082.05	1001.29	937.999	564.398	575.99	609.794	48.8636	51.6323	50.7801	46.5758	43.1079	39.053	42.8238	40.9728
pgaptmp_004235	pgaptmp_004235	cyoB	protein_coding	protein_coding	pgaptmp_004235	0.4885	2037	GO:0015990	GO:0009486	GO:0016020	TRUE	2.26848	5.80884e-07	8.84718e-06	Chromosome_II	1086286	1088322	2037	+	13.9451	9416.05	6615.84	7789.3	5621.34	8940.34	5790.82	9365.36	14923	14562.9	46119.5	52518.8	42303.9	36120.3	31596.6	30567.6	29999.1	32194.5	39324.5	6130.15	6706.08	8901.82	190.474	134.226	159.606	148.666	226.938	139.15	218.91	318.348
pgaptmp_001138	pgaptmp_001138	pgaptmp_001138	protein_coding	protein_coding	pgaptmp_001138	0.4245	1272				TRUE	-1.76676	5.81889e-07	8.84718e-06	Chromosome_I	1207652	1208923	1272	+	10.7454	2584.13	3137.62	3401.28	2608.56	2572.52	3297.03	3698.92	3315.8	3095.84	910.12	919.76	892.949	717.309	717.019	718.012	992.722	870.805	859.943	2848.81	2745.51	2246.43	83.7117	101.942	111.608	110.478	104.572	126.873	138.459	113.276
pgaptmp_002824	pgaptmp_002824	carB	protein_coding	protein_coding	pgaptmp_002824	0.4771	3234	GO:0008152	GO:0005524,GO:0046872		TRUE	2.11932	5.83204e-07	8.84718e-06	Chromosome_I	3065412	3068645	3234	-	11.2599	4022.67	3147.3	2729.03	1247.26	1604.41	979.706	1139.67	1920.22	1668.61	3305.49	3526.65	3597.73	5435.05	6025.84	5570.19	2973.11	3083.77	3409.34	1224.91	1181.29	1755.44	51.2546	40.2198	35.2216	20.777	25.6519	14.8282	16.7793	25.8018
pgaptmp_005268	pgaptmp_005268	pgaptmp_005268	protein_coding	protein_coding	pgaptmp_005268	0.4838	711		GO:0016787		TRUE	-2.85114	5.84541e-07	8.84718e-06	Chromosome_II	2253011	2253721	711	+	7.42657	813.323	609.921	487.648	510.565	588.513	250.699	557.585	670.175	694.611	32.2881	47.1672	27.7889	35.3499	44.3975	43.476	55.6194	37.2822	51.5966	256.494	393.126	469.392	47.1359	35.4524	28.6271	38.6853	42.7987	17.259	37.34	40.9597
pgaptmp_002689	pgaptmp_002689	fdx	protein_coding	protein_coding	pgaptmp_002689	0.4425	339	GO:0016226	GO:0009055,GO:0051537		TRUE	1.55299	5.8632e-07	8.84718e-06	Chromosome_I	2913160	2913498	339	-	10.9842	1800.88	1673.98	1780.69	992.303	1146.3	1484.4	1472.29	1503.79	1332.22	2641.57	2305.75	2812.23	4613.17	4516.33	4458.26	2432.08	2762.87	2181.61	1753.55	1483.3	1672.36	218.898	204.076	219.245	157.692	174.841	214.331	206.789	192.764
pgaptmp_002094	pgaptmp_002094	pgaptmp_002094	protein_coding	protein_coding	pgaptmp_002094	0.4749	777		GO:0016491,GO:0070403		TRUE	-1.89414	5.86674e-07	8.84718e-06	Chromosome_I	2270531	2271307	777	-	8.95787	1450.88	1521.72	1637.75	802.683	646.545	763.643	1691.32	1513.49	1502.53	137.224	186.855	233.426	144.346	179.81	169.952	187.083	213.041	226.231	583.398	746.748	698.687	76.9427	80.9386	87.9764	55.6528	43.0251	48.1063	103.642	84.6441
pgaptmp_000765	pgaptmp_000765	argA	protein_coding	protein_coding	pgaptmp_000765	0.4589	1338	GO:0006526	GO:0004042		TRUE	-1.70558	5.90544e-07	8.8801e-06	Chromosome_I	811229	812566	1338	-	11.4376	13431	14332.7	15924.1	11941.6	12283	9677.49	18104.1	20529.9	19280.2	641.725	807.284	691.016	500.791	419.556	469.014	810.694	790.915	658.849	1550.7	1778.31	1545.25	413.629	442.704	496.753	480.806	474.67	354.029	644.248	666.758
pgaptmp_002184	pgaptmp_002184	pgaptmp_002184	protein_coding	protein_coding	pgaptmp_002184	0.4297	861	GO:0006355	GO:0003700,GO:0043565		TRUE	-2.19442	5.95247e-07	8.91406e-06	Chromosome_I	2365115	2365975	861	-	10.6417	2316.62	2099.96	2110.69	2433.67	2759.59	2645.54	1456.7	1371.7	1484.93	918.192	1028.61	1005.96	525.83	674.841	765.441	1786.56	1485.96	1520.11	3529.45	2683.71	3455.22	110.869	100.797	102.32	152.273	165.724	150.398	80.5564	69.2296
pgaptmp_004007	pgaptmp_004007	pgaptmp_004007	protein_coding	protein_coding	pgaptmp_004007	0.4458	480				TRUE	-2.22319	5.96197e-07	8.91406e-06	Chromosome_II	775197	775676	480	+	11.5884	3592.5	4609.17	4080.07	6416.98	6611.55	6066.26	6521.74	5790.52	5615.3	1735.48	1701.65	1476.52	1028.09	1358.56	1445.25	1422.51	1275.58	1205.24	7360.65	6123.08	5606.11	308.4	396.847	354.787	720.2	712.207	618.604	646.927	524.221
pgaptmp_003226	pgaptmp_003226	pgaptmp_003226	protein_coding	protein_coding	pgaptmp_003226	0.4944	807				TRUE	-1.55227	5.97884e-07	8.91406e-06	Chromosome_I	3493751	3494557	807	-	11.3974	5119.7	5975.99	5997.99	4235.06	4289.59	3915.53	7685.18	6848.78	6418.29	799.129	743.79	816.993	1512.68	1408.51	1495.31	1016.32	1259.6	1307.11	4175.99	4853.86	4801.09	261.414	306.04	310.222	282.716	274.844	237.492	453.433	368.788
pgaptmp_000167	pgaptmp_000167	pgaptmp_000167	protein_coding	protein_coding	pgaptmp_000167	0.4499	2136				TRUE	-4.18281	6.04803e-07	8.97766e-06	Chromosome_I	175317	177452	2136	+	11.6924	37357.4	24299.1	13655	8538.03	11341.5	2545.75	4567.6	13302	10755.6	583.203	640.385	570.598	645.136	643.763	607.346	726.423	764.284	903.602	7338.3	10541.1	19437	720.665	470.145	266.827	215.338	274.545	58.3375	101.817	270.616
pgaptmp_000524	pgaptmp_000524	tkt	protein_coding	protein_coding	pgaptmp_000524	0.4905	2010		GO:0004802		TRUE	2.36785	6.05561e-07	8.97766e-06	Chromosome_I	532496	534505	2010	+	11.2358	2211.01	1692.46	1378.81	1171.67	1398.23	638.294	913.965	1513.49	1462.41	4330.64	3835.05	4196.12	6902.07	8502.11	8364.51	3775.38	4094.38	4484.93	1469.11	1323.38	2097.72	45.3265	34.7989	28.6319	31.4033	35.9688	15.5438	21.6504	32.7206
pgaptmp_000338	pgaptmp_000338	pspG	protein_coding	protein_coding	pgaptmp_000338	0.3843	216				TRUE	2.21126	6.1936e-07	9.15644e-06	Chromosome_I	356611	356826	216	+	10.4544	641.408	770.102	795.593	459.316	509.316	731.481	709.047	558.231	556.674	5543.46	5101.31	5040.9	3362.66	3161.1	3160.57	4152.91	3432.62	3163.27	846.039	787.526	563.27	122.36	147.345	153.737	114.557	121.921	165.761	156.298	112.305
pgaptmp_000935	pgaptmp_000935	fadJ	protein_coding	protein_coding	pgaptmp_000935	0.4662	2115	GO:0006635	GO:0003857,GO:0008692,GO:0016491,GO:0051287		TRUE	1.9031	6.29808e-07	9.28482e-06	Chromosome_I	981881	983995	2115	+	8.50045	340.748	323.003	302.227	187.058	223.935	202.044	198.979	258.965	225.203	659.887	888.92	800.319	745.294	645.983	602.076	588.217	528.608	615.19	180.496	157.378	211.018	6.63867	6.31157	5.96437	4.76463	5.47465	4.67593	4.47949	5.3207
pgaptmp_004425	pgaptmp_004425	nirD	protein_coding	protein_coding	pgaptmp_004425	0.4969	324				TRUE	-3.13139	6.3416e-07	9.31135e-06	Chromosome_II	1295160	1295483	324	-	7.6191	627.531	462.941	524.405	820.62	749.637	620.151	679.348	1097.06	938.111	54.4861	59.866	88.9244	29.4583	43.2875	36.8887	21.9107	38.6137	38.3667	296.728	375.286	570.747	79.8084	59.0504	67.5559	136.446	119.633	93.6882	99.8344	147.137
pgaptmp_002026	pgaptmp_002026	pgaptmp_002026	protein_coding	protein_coding	pgaptmp_002026	0.4439	579		GO:0004797,GO:0005524		TRUE	1.44938	6.36533e-07	9.31135e-06	Chromosome_I	2192174	2192752	579	-	10.731	874.997	945.246	822.549	1351.68	1382.53	1194.94	633.316	638.085	696.018	3174.32	2782.86	3040.1	3679.34	3518.5	3551.86	3994.48	3923.95	3057.43	1371.88	1312.54	1488.76	62.2711	67.4695	59.2958	125.765	123.464	101.019	52.0804	47.8892
pgaptmp_000592	pgaptmp_000592	pgaptmp_000592	protein_coding	protein_coding	pgaptmp_000592	0.5031	1131				TRUE	2.09164	6.36915e-07	9.31135e-06	Chromosome_I	595921	597051	1131	+	9.40854	606.716	543.912	571.782	354.257	403.493	473.36	455.869	523.155	477.149	730.517	879.849	863.307	1676.18	1223.15	1266.07	1532.06	1434.03	1623.31	296.728	367.003	356.405	22.1045	19.875	21.1013	16.8741	18.4466	20.4862	19.1915	20.1004
pgaptmp_002979	pgaptmp_002979	rpmD	protein_coding	protein_coding	pgaptmp_002979	0.4011	177	GO:0006412	GO:0003735	GO:0015934	TRUE	3.20287	6.3915e-07	9.31769e-06	Chromosome_I	3236726	3236902	177	-	16.2938	78969.5	51749.1	40506.6	20874.2	33728.2	14765.7	21304.8	52283.4	42215.7	251552	285379	332034	256508	236127	264754	241693	233774	257177	23726	22938.3	41161.1	18384.2	12082.9	9551.99	6353.33	9852.89	4083.32	5731.09	12835.9
pgaptmp_001869	pgaptmp_001869	pgaptmp_001869	protein_coding	protein_coding	pgaptmp_001869	0.4977	1965		GO:0005524,GO:0051082,GO:0140662		TRUE	2.26991	6.4089e-07	9.31769e-06	Chromosome_I	2002055	2004019	1965	+	12.7313	6406.37	5108.2	4547.3	3199.84	4056.78	2404.73	2598.6	4362.11	4045.21	15409.5	16249.1	17481	18427.6	16926.5	18591.9	9103.04	9809.2	10594.5	3530	3297.29	5083.55	134.341	107.435	96.5899	87.7263	106.749	59.9014	62.9665	96.4654
pgaptmp_003881	pgaptmp_003881	pgaptmp_003881	protein_coding	protein_coding	pgaptmp_003881	0.4947	936				TRUE	-2.47542	6.484e-07	9.40091e-06	Chromosome_II	648069	649004	936	-	7.50873	328.413	321.243	382.277	319.023	271.044	245.751	472.203	473.153	466.593	64.5761	48.9813	53.7251	66.2811	58.8266	59.2854	97.7553	126.493	92.6092	291.14	447.284	475.207	14.4578	14.184	17.0468	18.3616	14.9729	12.8515	24.0207	21.9666
pgaptmp_000519	pgaptmp_000519	rsmE	protein_coding	protein_coding	pgaptmp_000519	0.4727	732	GO:0006364	GO:0008168		TRUE	1.90806	6.57432e-07	9.50567e-06	Chromosome_I	527601	528332	732	-	11.4417	2839.31	2781.17	2356.56	1684.16	1860.44	1162.78	1986.07	2462.78	2410.38	3475	3294.44	3347.63	6034.53	7025.9	6804.65	3461.88	3194.28	3401.4	1685.93	1668.08	2268.03	159.831	157.021	134.372	123.947	131.416	77.7536	129.186	146.202
pgaptmp_002978	pgaptmp_002978	rplO	protein_coding	protein_coding	pgaptmp_002978	0.4621	435	GO:0006412	GO:0003735	GO:0015934	TRUE	3.02293	6.6029e-07	9.52084e-06	Chromosome_I	3236286	3236720	435	-	17.3075	135609	104408	84340.2	47232.1	75867.6	52519.8	58114.4	107574	90078.4	437998	591719	601512	540131	370253	426192	439010	419350	437314	51605.6	50041.7	73813.3	12845.7	9919.44	8092.57	5849.41	9018.02	5909.72	6361.02	10746.2
pgaptmp_002032	pgaptmp_002032	hisIE	protein_coding	protein_coding	pgaptmp_002032	0.4906	636	GO:0000105	GO:0004635,GO:0004636		TRUE	1.86316	6.69214e-07	9.62315e-06	Chromosome_I	2197961	2198596	636	-	8.08664	269.823	204.187	220.544	165.918	146.787	136.895	147.007	199.262	201.979	401.583	399.107	420.538	514.047	603.805	526.982	483.72	495.32	531.842	130.762	152.281	180.28	17.4816	13.2682	14.4737	14.054	11.9337	10.5357	11.0056	13.6146
pgaptmp_004644	pgaptmp_004644	pgaptmp_004644	protein_coding	protein_coding	pgaptmp_004644	0.2838	444				TRUE	-3.60661	6.75031e-07	9.68034e-06	Chromosome_II	1554826	1555269	444	-	8.73379	1161.78	1408.19	1413.93	1747.58	1415.3	1406.06	1623.01	1440.35	1718.58	72.6481	52.6095	83.3666	73.6457	96.5645	36.8887	229.219	153.123	154.79	1132.15	969.116	895.582	107.82	131.075	132.919	212.04	164.82	155.008	174.049	140.969
pgaptmp_004956	pgaptmp_004956	pgaptmp_004956	protein_coding	protein_coding	pgaptmp_004956	0.4071	678				TRUE	-1.7293	6.79572e-07	9.71899e-06	Chromosome_II	1888878	1889555	678	+	10.4669	1201.1	1448.67	1569.95	2049.31	1715.7	2183.72	2782.73	1906.79	2300.59	1170.44	1135.64	1030.04	699.634	746.987	804.964	834.291	822.871	767.334	3029.31	2539.71	2421.73	72.9973	88.3044	96.6489	162.833	130.844	157.652	195.422	122.211
pgaptmp_002763	pgaptmp_002763	lspA	protein_coding	protein_coding	pgaptmp_002763	0.4576	507	GO:0006508,GO:0009306	GO:0004190	GO:0005886	TRUE	1.53179	6.83218e-07	9.72572e-06	Chromosome_I	2991182	2991688	507	-	10.9978	1110.9	1115.99	1231.78	1046.11	1033.65	1446.47	1125.57	1151.54	992.301	3955.29	3853.19	4196.12	3791.28	3184.41	3574.25	6114.76	5541.73	5387.21	1309.85	1256.47	1296.85	90.287	90.969	101.407	111.157	105.417	139.648	105.705	98.6978
pgaptmp_000332	pgaptmp_000332	pgaptmp_000332	protein_coding	protein_coding	pgaptmp_000332	0.4628	1197			GO:0019867	TRUE	1.60407	6.83739e-07	9.72572e-06	Chromosome_I	350520	351716	1197	+	10.713	1477.86	1315.77	1314.28	1007.04	1123.77	979.706	968.907	1091.09	1017.64	2118.9	2019.12	2234.22	3520.26	3205.5	3301.54	2914.12	3102.41	3408.02	1113.15	1056.41	1326.76	50.8741	45.4286	45.8284	45.3227	48.5432	40.0622	38.5408	39.6098
pgaptmp_001146	pgaptmp_001146	pgaptmp_001146	protein_coding	protein_coding	pgaptmp_001146	0.4569	1020				TRUE	1.75929	6.91446e-07	9.78913e-06	Chromosome_I	1215425	1216444	1020	-	9.44668	494.932	444.459	552.178	428.567	477.911	352.133	331.878	344.79	362.436	1596.24	1534.75	1895.2	1349.19	1357.45	1388.6	1021.37	1250.28	1251.55	472.753	430.718	361.39	19.9942	18.0083	22.5954	22.6351	24.2265	16.8982	15.4921	14.689
pgaptmp_001456	pgaptmp_001456	pgaptmp_001456	protein_coding	protein_coding	pgaptmp_001456	0.4432	774				TRUE	-2.2585	6.91917e-07	9.78913e-06	Chromosome_I	1507148	1507921	774	-	9.88255	1881.05	2071.8	2184.21	2198.57	1831.08	2375.05	2657.25	1931.42	2047.24	276.466	283.003	192.669	325.514	447.304	366.252	416.303	362.17	377.052	2378.3	1709.49	1811.1	100.142	110.624	117.786	153.025	122.324	150.198	163.465	108.436
pgaptmp_003200	pgaptmp_003200	ilvY	protein_coding	protein_coding	pgaptmp_003200	0.4489	891	GO:0006355	GO:0003700		TRUE	-1.53291	7.03327e-07	9.92389e-06	Chromosome_I	3470697	3471587	891	+	11.502	4014.19	4016.85	4709.03	4165.88	3685.37	3115.6	5282.58	4616.6	5101.55	1378.3	1538.38	1457.99	1480.28	1458.46	1511.12	2207.92	2395.38	2218.65	4369.34	4997.86	4368.25	185.643	186.316	220.594	251.88	213.869	171.158	282.294	225.155
pgaptmp_002229	pgaptmp_002229	mukF	protein_coding	protein_coding	pgaptmp_002229	0.4738	1338	GO:0007059	GO:0005509		TRUE	2.56585	7.06625e-07	9.94377e-06	Chromosome_I	2415222	2416559	1338	-	11.1824	2193.28	1518.2	1480.91	942.976	1474.7	666.332	893.176	1556.03	1389.22	5634.27	7062.38	6348.83	6656.1	6904.91	7144.55	2959.62	3266.18	3979.55	1006.98	1006.07	1699.78	67.5453	46.8937	46.1971	37.9672	56.9889	24.3763	31.7844	50.5358
pgaptmp_005045	pgaptmp_005045	pgaptmp_005045	protein_coding	protein_coding	pgaptmp_005045	0.4534	1632				TRUE	-1.93503	7.12678e-07	1.00022e-05	Chromosome_II	2005970	2007601	1632	+	8.64938	320.704	280.757	267.921	969.881	885.5	558.301	327.424	456.734	444.776	264.358	339.241	255.658	203.262	274.154	226.602	291.58	312.904	236.815	981.271	858.888	1107.43	8.09734	7.10972	6.85215	32.0157	28.0551	16.7448	9.55262	12.1613
pgaptmp_001586	pgaptmp_001586	pgaptmp_001586	protein_coding	protein_coding	pgaptmp_001586	0.4353	1167				TRUE	-1.95393	7.17828e-07	1.00043e-05	Chromosome_I	1654167	1655333	1167	+	7.46382	184.251	220.029	267.921	276.743	234.176	258.946	305.15	279.115	284.319	90.8102	87.0778	74.1036	100.158	103.224	73.7774	112.924	89.2109	99.2242	400.667	423.71	395.452	6.50573	7.79204	9.58244	12.7753	10.3757	10.861	12.4502	10.3932
pgaptmp_002653	pgaptmp_002653	pgaptmp_002653	protein_coding	protein_coding	pgaptmp_002653	0.4653	576	GO:0055085			TRUE	-1.97556	7.18021e-07	1.00043e-05	Chromosome_I	2872003	2872578	576	+	8.9112	625.218	806.187	808.663	643.812	663.613	715.812	722.411	649.279	684.054	286.557	239.464	322.351	188.533	192.019	238.459	370.796	351.518	300.319	1025.42	847.419	788.412	44.7268	57.8436	58.5984	60.2144	59.5712	60.8288	59.7165	48.9831
pgaptmp_002757	pgaptmp_002757	pgaptmp_002757	protein_coding	protein_coding	pgaptmp_002757	0.4825	342				TRUE	-1.8071	7.19095e-07	1.00043e-05	Chromosome_I	2984784	2985125	342	-	10.0844	1729.18	2352.55	2321.43	1697.61	1282.17	1712.84	2528.81	2021.72	2074.68	377.367	417.248	442.769	531.722	536.099	479.553	615.184	605.835	576.823	2237.48	1850.3	1733.01	208.34	284.286	283.316	267.409	193.848	245.145	352.065	256.881
pgaptmp_001270	pgaptmp_001270	rimJ	protein_coding	protein_coding	pgaptmp_001270	0.4615	585		GO:0008080		TRUE	1.76378	7.20432e-07	1.00043e-05	Chromosome_I	1358653	1359237	585	+	9.77207	696.143	563.275	596.287	564.376	759.878	503.873	402.412	474.645	508.114	1576.06	1716.16	1637.69	1852.93	1720.4	1829.94	1329.81	1382.1	1465.87	515.223	491.248	671.271	49.0344	39.7929	42.5442	51.9729	67.1633	42.1597	32.7527	35.2574
pgaptmp_001267	pgaptmp_001267	pgaptmp_001267	protein_coding	protein_coding	pgaptmp_001267	0.4808	1377				TRUE	1.5517	7.26341e-07	1.00351e-05	Chromosome_I	1354530	1355906	1377	+	8.8787	464.866	438.298	424.752	241.509	259.437	238.329	331.136	330.61	380.734	561.005	680.296	583.566	1085.54	910.148	973.598	557.879	688.389	654.88	354.844	352.348	352.251	13.9108	13.1546	12.8749	9.44853	9.74187	8.47181	11.45	10.4332
pgaptmp_004087	pgaptmp_004087	pgaptmp_004087	protein_coding	protein_coding	pgaptmp_004087	0.4167	264				TRUE	-2.27882	7.26465e-07	1.00351e-05	Chromosome_II	893526	893789	264	-	8.00793	262.885	352.927	312.846	591.282	419.879	606.131	659.302	417.18	497.558	119.062	83.4496	109.303	89.8477	122.093	101.444	187.083	142.471	107.162	701.307	498.257	523.392	41.0317	55.2487	49.4616	120.658	82.2363	112.382	118.909	68.6685
pgaptmp_001026	pgaptmp_001026	rsxD	protein_coding	protein_coding	pgaptmp_001026	0.4814	1047	GO:0022900,GO:0055085		GO:0016020	TRUE	1.63037	7.29716e-07	1.00537e-05	Chromosome_I	1085350	1086396	1047	-	10.8505	1633.59	1407.31	1565.86	853.931	1001.56	960.739	1147.84	1288.11	1102.79	2962.43	3524.84	3334.66	3505.53	3135.57	3417.48	3325.36	3547.13	3495.34	1029.33	1097.82	1315.96	64.2915	55.55	62.4236	43.938	49.4625	44.915	52.1996	53.4618
pgaptmp_000670	pgaptmp_000670	folP	protein_coding	protein_coding	pgaptmp_000670	0.4465	831	GO:0009396	GO:0004156		TRUE	2.68747	7.37898e-07	1.01098e-05	Chromosome_I	694890	695720	831	+	11.3588	2961.89	2011.07	1692.47	1292.11	1704.09	766.942	1016.42	1791.86	1639.06	4722.13	3873.15	4496.24	8884.62	9080.39	8501.53	3940.55	4336.71	4658.24	1091.92	1263.48	2012.15	146.867	100.015	85.0084	83.7649	106.032	45.1746	58.238	93.7003
pgaptmp_000440	pgaptmp_000440	lptG	protein_coding	protein_coding	pgaptmp_000440	0.4743	1071	GO:0055085	GO:0015221	GO:0043190	TRUE	1.68604	7.38445e-07	1.01098e-05	Chromosome_I	475459	476529	1071	+	11.2404	2028.3	1921.3	2126.21	1329.26	1482.21	1691.4	1665.33	1661.26	1545.46	3626.35	3757.05	4157.21	5670.72	4416.44	4786.31	2925.92	3643	3038.91	1641.78	1627.3	1629.99	78.037	74.1389	82.8624	66.863	71.5588	77.3016	74.0362	67.4039
pgaptmp_003065	pgaptmp_003065	pgaptmp_003065	protein_coding	protein_coding	pgaptmp_003065	0.463	1674			GO:0098561	TRUE	-1.78857	7.40649e-07	1.01098e-05	Chromosome_I	3315022	3316695	1674	-	10.9745	7787.86	7177.35	6778.88	3803.29	3798.71	2483.08	5417.71	6633.84	5897.5	593.293	740.162	759.562	721.728	710.359	766.758	659.005	644.449	748.812	2232.45	2786.93	3136.2	191.7	177.195	169.022	122.396	117.334	72.6052	154.097	172.206
pgaptmp_003257	pgaptmp_003257	rsmG	protein_coding	protein_coding	pgaptmp_003257	0.4465	636	GO:0031167,GO:0046118	GO:0008168	GO:0005575	TRUE	2.01744	7.41474e-07	1.01098e-05	Chromosome_I	3524590	3525225	636	-	11.9469	3658.8	2978.32	2790.29	1648.29	2223.65	1725.21	1820.51	2590.4	2450.49	6615.02	6679.6	7877.22	10098.3	8748.52	8996.89	6885	7737.38	7269.82	2093.3	2217.94	3004.11	237.05	193.533	183.119	139.617	180.781	132.775	136.291	176.989
pgaptmp_003653	pgaptmp_003653	pgaptmp_003653	protein_coding	protein_coding	pgaptmp_003653	0.4472	1545				TRUE	2.44548	7.44373e-07	1.01231e-05	Chromosome_II	411051	412595	1545	+	6.75112	56.2774	36.9649	59.6287	65.9827	61.4456	56.9021	49.0022	70.152	72.4872	119.062	243.092	114.861	450.712	277.484	387.331	143.262	327.55	251.368	58.1163	60.5299	78.0935	1.50094	0.988787	1.6109	2.30073	2.0564	1.80274	1.51015	1.9731
pgaptmp_004297	pgaptmp_004297	pgaptmp_004297	protein_coding	protein_coding	pgaptmp_004297	0.4706	1749		GO:0004329,GO:0005524		TRUE	1.61493	7.51702e-07	1.01797e-05	Chromosome_II	1152184	1153932	1749	-	10.5793	874.226	684.731	725.346	873.149	1165.42	906.311	862.735	1026.91	1027.49	3024.99	3140.24	3219.8	3128.47	3001.27	3426.7	2255.11	2671	2616.87	1009.21	1030.28	1265.28	20.5964	16.1797	17.31	26.8945	34.4537	25.3641	23.4866	25.514
pgaptmp_001990	pgaptmp_001990	pgaptmp_001990	protein_coding	protein_coding	pgaptmp_001990	0.4643	1428			GO:0005886,GO:0016020	TRUE	1.55454	7.52404e-07	1.01797e-05	Chromosome_I	2153220	2154647	1428	-	10.5351	1083.92	1232.16	1278.34	1063.41	1118.99	1650.99	1107	1088.1	891.663	2108.81	2068.1	2149.01	2876.6	2643.87	2825.94	1754.54	1677.7	1840.28	1093.59	977.399	930.475	31.2771	35.66	37.3645	40.1178	40.5176	56.5911	36.9108	33.1115
pgaptmp_001844	pgaptmp_001844	pgaptmp_001844	protein_coding	protein_coding	pgaptmp_001844	0.4608	1428		GO:0022857	GO:0016020	TRUE	-1.95672	7.57514e-07	1.02226e-05	Chromosome_I	1974186	1975613	1428	+	11.6405	6813.42	8460.56	9550.39	5317.05	5169.63	4694.01	5215.76	4956.91	4756.01	2011.95	2367.43	2108.25	1064.92	1098.84	1438.66	1267.45	1319.52	1275.36	5000.23	5440.05	4474.59	196.605	244.857	279.147	200.589	187.187	160.897	173.909	150.841
pgaptmp_002778	pgaptmp_002778	pgaptmp_002778	protein_coding	protein_coding	pgaptmp_002778	0.4531	1035		GO:0047834		TRUE	-1.85387	7.6999e-07	1.03643e-05	Chromosome_I	3008346	3009380	1035	+	11.1889	6653.06	7679.9	7035.36	5600.84	4801.64	3072.72	6553.67	7130.88	6863.06	653.833	571.448	553.925	908.788	1300.85	1123.79	635.409	637.791	632.389	4154.19	4278.51	4457.97	264.874	306.66	283.718	291.526	239.879	145.316	301.493	299.392
pgaptmp_004670	pgaptmp_004670	pgaptmp_004670	protein_coding	protein_coding	pgaptmp_004670	0.4224	909				TRUE	-1.91474	7.84841e-07	1.05373e-05	Chromosome_II	1584619	1585527	909	-	8.38504	227.422	247.313	292.425	698.904	703.211	774.364	438.792	370.164	396.92	314.809	228.579	226.016	178.223	167.6	189.713	241.017	159.781	168.02	863.362	720.625	631.394	10.3093	11.2441	13.4274	41.4207	40.0005	41.6979	22.9841	17.6957
pgaptmp_002228	pgaptmp_002228	mukE	protein_coding	protein_coding	pgaptmp_002228	0.4807	726	GO:0007059,GO:0030261			TRUE	2.84861	7.8868e-07	1.05417e-05	Chromosome_I	2414516	2415241	726	-	10.4457	1546.47	978.69	896.063	481.738	712.769	373.575	469.233	927.648	800.878	3142.03	4036.42	3908.97	4574.87	4796.03	4964.17	1955.11	2110.44	2582.47	566.075	532.026	1006.91	87.7735	55.7122	51.5161	35.7469	50.7641	25.1868	30.7741	55.5244
pgaptmp_004159	pgaptmp_004159	tssM	protein_coding	protein_coding	pgaptmp_004159	0.4369	3390	GO:0033103	GO:0003674		TRUE	-1.80469	7.89176e-07	1.05417e-05	Chromosome_II	996442	999831	3390	-	8.09014	250.55	320.363	271.188	495.831	449.919	440.373	545.706	521.662	527.82	203.818	232.208	150.06	117.833	138.742	101.444	148.318	171.764	129.653	477.783	457.479	464.407	3.04546	3.90556	3.33896	7.87949	6.86243	6.35849	7.66464	6.68694
pgaptmp_002813	pgaptmp_002813	gltB	protein_coding	protein_coding	pgaptmp_002813	0.4908	4464	GO:0006537,GO:0008152	GO:0003824,GO:0015930,GO:0016491		TRUE	1.82729	7.93173e-07	1.05683e-05	Chromosome_I	3052098	3056561	4464	+	11.5977	3287.99	3359.41	3636.53	2123.62	2085.74	2112.8	2037.3	2035.9	2008.53	3396.3	3194.67	3084.56	6253.99	7073.62	6087.95	4407.41	4709.54	4959.89	2077.1	2056.11	1658.24	30.3504	31.1014	34.002	25.6281	24.159	23.1669	21.7302	19.8185
pgaptmp_001424	pgaptmp_001424	pgaptmp_001424	protein_coding	protein_coding	pgaptmp_001424	0.4477	726				TRUE	-2.25174	7.98153e-07	1.06078e-05	Chromosome_I	1475393	1476118	726	-	11.4957	3577.85	4569.57	5123.16	6119.09	5625.01	9590.07	4525.28	3246.4	3074.73	536.789	522.467	600.239	1150.35	1284.2	1654.72	3421.43	2906.68	2811.35	8249.16	6016.04	6511.67	203.069	260.124	294.539	454.061	400.618	646.574	296.785	194.313
pgaptmp_000925	pgaptmp_000925	pgaptmp_000925	protein_coding	protein_coding	pgaptmp_000925	0.4819	1986				TRUE	2.14318	8.00748e-07	1.06155e-05	Chromosome_I	970185	972170	1986	+	12.3642	5220.69	4458.67	4411.7	2552.18	3426.62	2642.24	2981.71	4466.59	3900.94	6826.91	7829.75	8064.33	14175.3	10619.9	11861	7112.54	8401.8	10324.6	2418.53	2995.28	3409.53	108.32	92.7829	92.7188	69.2304	89.2135	65.1217	71.4856	97.7315
pgaptmp_002862	pgaptmp_002862	yqiA	protein_coding	protein_coding	pgaptmp_002862	0.4393	585				TRUE	1.63915	8.06866e-07	1.06697e-05	Chromosome_I	3111804	3112388	585	-	10.4127	1187.99	903	1073.32	807.167	839.074	667.982	783.292	882.124	848.03	1670.91	1467.62	1639.54	2447.98	2773.73	2907.62	3210.75	2844.1	3867.1	801.334	970.391	986.968	83.6789	63.7931	76.5795	74.3313	74.1632	55.8909	63.753	65.5256
pgaptmp_001920	pgaptmp_001920	cydC	protein_coding	protein_coding	pgaptmp_001920	0.4872	1722	GO:0034775,GO:0045454	GO:0005524,GO:0042626,GO:0140359	GO:0016020	TRUE	1.6601	8.10464e-07	1.06904e-05	Chromosome_I	2066665	2068386	1722	+	11.4641	2515.52	2366.63	2376.16	1358.09	1627.63	1375.55	1809.37	2171.73	2114.09	4932	6373.01	5820.84	5594.13	4652.85	5049.8	3745.04	4235.52	4342.05	1601.55	1599.9	1936.55	60.194	56.7989	57.5948	42.4874	48.8726	39.0999	50.0296	54.8036
pgaptmp_002396	pgaptmp_002396	folD	protein_coding	protein_coding	pgaptmp_002396	0.4866	861		GO:0004488		TRUE	1.653	8.15141e-07	1.07219e-05	Chromosome_I	2606855	2607715	861	+	10.0663	837.993	932.924	802.128	554.126	701.163	666.332	512.296	628.383	629.865	1735.48	2017.3	1911.87	2234.41	1753.7	2140.86	1896.11	1971.96	1907.75	640.955	690.041	724.441	40.1047	44.7801	38.8849	34.6713	42.1075	37.8809	28.3302	31.7146
pgaptmp_000051	pgaptmp_000051	pgaptmp_000051	protein_coding	protein_coding	pgaptmp_000051	0.4739	306				TRUE	1.48089	8.19277e-07	1.07219e-05	Chromosome_I	56702	57007	306	+	7.87601	199.669	150.5	185.421	117.872	152.931	145.142	113.596	111.198	128.084	353.151	342.869	418.686	452.185	402.907	436.077	529.227	544.586	511.997	157.584	159.926	157.018	26.8873	20.3262	25.2917	20.7517	25.8416	23.2169	17.6756	15.7912
pgaptmp_002307	pgaptmp_002307	pgaptmp_002307	protein_coding	protein_coding	pgaptmp_002307	0.4731	744				TRUE	-2.48607	8.20074e-07	1.07219e-05	Chromosome_I	2510658	2511401	744	-	8.63855	1120.92	1459.23	1480.1	809.089	749.637	878.272	1715.82	1494.09	1348.4	50.4501	83.4496	75.9562	153.183	106.554	93.5392	155.06	153.123	178.604	673.925	856.339	690.379	62.0813	81.0576	83.0345	58.5851	52.0981	57.7815	109.807	87.2651
pgaptmp_002496	pgaptmp_002496	flgM	protein_coding	protein_coding	pgaptmp_002496	0.4444	315	GO:0045892			TRUE	-2.03015	8.21e-07	1.07219e-05	Chromosome_I	2715125	2715439	315	+	10.9903	2685.12	3384.05	3505.02	3058.91	2729.55	2696.67	3537.07	2891.9	2899.49	1517.54	1741.56	1665.48	683.432	869.08	782.568	1466.33	1334.17	906.247	4086.58	3085.12	3044.81	351.246	443.984	464.431	523.142	448.048	419.034	534.645	398.943
pgaptmp_000225	pgaptmp_000225	cysE	protein_coding	protein_coding	pgaptmp_000225	0.4866	822	GO:0006535	GO:0009001		TRUE	1.73559	8.34311e-07	1.08253e-05	Chromosome_I	242995	243816	822	-	11.2368	2624.22	2281.26	1947.32	1408.06	1880.92	1386.27	1429.97	2132.17	1857.93	2566.9	2550.65	2834.46	5586.76	4908.14	5350.18	2779.28	3113.06	4029.82	1505.99	1553.39	1993.04	131.549	114.695	98.8798	92.2811	118.316	82.5483	82.8302	112.717
pgaptmp_001663	pgaptmp_001663	pgaptmp_001663	protein_coding	protein_coding	pgaptmp_001663	0.443	921				TRUE	-1.72754	8.34566e-07	1.08253e-05	Chromosome_I	1749593	1750513	921	+	9.79734	1705.28	1949.46	2060.86	1465.07	1478.79	1441.52	2001.66	1789.62	1934.63	460.105	475.3	407.57	446.293	415.116	345.173	332.031	358.175	280.474	1455.7	1487.13	1368.3	76.2947	87.4774	93.3965	85.6966	83.0216	76.6115	103.482	84.4382
pgaptmp_004741	pgaptmp_004741	pgaptmp_004741	protein_coding	protein_coding	pgaptmp_004741	0.4227	537				TRUE	-2.18561	8.35087e-07	1.08253e-05	Chromosome_II	1658268	1658804	537	-	8.98454	734.689	942.605	1015.32	987.818	867.066	1474.51	1604.45	1213.48	1224.54	207.854	253.977	183.407	187.06	140.962	146.237	266.299	300.92	191.833	915.331	802.818	662.133	56.3751	72.5433	78.9169	99.0985	83.4876	134.402	142.261	98.1965
pgaptmp_001158	pgaptmp_001158	pgaptmp_001158	protein_coding	protein_coding	pgaptmp_001158	0.4439	669				TRUE	-2.21804	8.55255e-07	1.10595e-05	Chromosome_I	1230056	1230724	669	+	6.44924	471.805	426.857	477.029	271.618	221.204	150.914	511.553	461.212	522.19	14.126	18.1412	33.3466	16.2021	22.1987	18.4444	8.42718	18.6411	17.1989	111.203	115.325	156.187	29.0599	26.3692	29.7618	21.8724	17.0967	11.0417	36.408	29.9579
pgaptmp_005212	pgaptmp_005212	pgaptmp_005212	protein_coding	protein_coding	pgaptmp_005212	0.4729	1125			GO:0019867	TRUE	1.70703	8.57634e-07	1.10631e-05	Chromosome_II	2183161	2184285	1125	+	8.73468	246.695	241.152	222.178	228.697	284.698	299.355	221.995	228.367	269.54	952.498	1086.66	1374.62	882.275	708.139	895.869	699.456	631.134	689.277	271.023	238.934	281.635	9.0358	8.8589	8.24308	10.9515	13.0851	13.0247	9.39556	8.82101
pgaptmp_002690	pgaptmp_002690	hscA	protein_coding	protein_coding	pgaptmp_002690	0.4822	1854	GO:0006457,GO:0016226	GO:0005515,GO:0005524,GO:0016887		TRUE	2.78213	8.64373e-07	1.11227e-05	Chromosome_I	2913512	2915365	1854	-	12.6577	6444.91	4535.24	4636.33	2484.28	3247.06	1858.8	2330.57	4370.32	3850.27	11775.1	12408.6	13177.5	24605	24676.1	23185.9	9123.26	10829.1	10340.5	2931.52	3050.07	5253.03	143.24	101.096	104.377	72.1863	90.5575	49.0746	59.853	102.433
pgaptmp_000462	pgaptmp_000462	pgaptmp_000462	protein_coding	protein_coding	pgaptmp_000462	0.453	1437				TRUE	-2.08624	8.68217e-07	1.11449e-05	Chromosome_I	494560	495996	1437	+	11.3085	6810.33	6555.11	6893.24	3713.61	4546.3	3068.59	5718.41	6671.9	6082.59	809.219	1070.33	1035.6	1023.68	925.687	938.027	967.44	1138.44	1170.85	3318.21	4990.22	4831.82	195.285	188.523	200.22	139.221	163.585	104.524	189.475	201.758
pgaptmp_001894	pgaptmp_001894	pgaptmp_001894	protein_coding	protein_coding	pgaptmp_001894	0.4493	957		GO:0003677,GO:0003700		TRUE	-1.47768	8.72629e-07	1.11743e-05	Chromosome_I	2035004	2035960	957	+	9.8083	1403.08	1519.08	1584.65	1094.16	1022.05	1031.66	1633.41	1526.18	1431.45	540.825	536.98	555.777	427.145	472.833	487.458	530.912	533.934	592.699	1440.61	1390.28	1323.43	60.4127	65.6011	69.1135	61.5932	55.2208	52.7664	81.2671	69.2996
pgaptmp_000188	pgaptmp_000188	pgaptmp_000188	protein_coding	protein_coding	pgaptmp_000188	0.502	3432				TRUE	1.71939	8.76984e-07	1.12028e-05	Chromosome_I	202833	206264	3432	+	8.82964	355.395	416.295	362.673	311.336	313.373	371.926	435.822	444.047	415.218	286.557	277.561	326.056	966.231	947.886	803.647	864.628	1046.56	990.919	251.465	305.836	303.235	4.267	5.01298	4.41071	4.88704	4.72126	5.30446	6.04637	5.62237
pgaptmp_005287	pgaptmp_005287	pgaptmp_005287	protein_coding	protein_coding	pgaptmp_005287	0.4795	1026	GO:0055085	GO:0022857	GO:0016020	TRUE	-1.93496	8.82275e-07	1.12429e-05	Chromosome_II	2272075	2273100	1026	-	9.72261	1055.39	842.272	980.197	1077.5	1116.95	810.649	1147.1	1467.97	1616.54	807.201	1179.18	824.403	415.362	384.038	395.236	345.514	440.728	377.052	1358.47	1549.57	2037.91	42.3863	33.9271	39.8756	56.5764	56.2896	38.6739	53.2335	62.1737
pgaptmp_003432	pgaptmp_003432	pgaptmp_003432	protein_coding	protein_coding	pgaptmp_003432	0.4932	1839		GO:0005524,GO:0016887,GO:0042626,GO:0140359	GO:0055052	TRUE	1.47768	8.8439e-07	1.12429e-05	Chromosome_II	177968	179806	1839	-	10.0677	790.967	766.582	805.395	778.339	968.793	823.019	824.87	933.619	971.892	1362.15	1478.51	1365.36	2121	1915.75	1870.78	1272.5	1323.52	1303.14	715.836	716.802	809.181	17.7229	17.2273	18.2797	22.8009	27.2391	21.9059	21.3568	22.061
pgaptmp_004712	pgaptmp_004712	betI	protein_coding	protein_coding	pgaptmp_004712	0.4817	600		GO:0003677		TRUE	-1.69949	8.88365e-07	1.12662e-05	Chromosome_II	1629614	1630213	600	-	7.69486	148.017	125.857	157.648	309.414	333.855	266.368	345.243	324.64	318.803	161.44	145.13	101.893	110.469	118.763	97.4916	214.05	155.786	215.647	354.844	410.966	425.36	10.1653	8.66896	10.9668	27.7813	28.7707	21.7302	27.3972	23.5119
pgaptmp_003004	pgaptmp_003004	hslU	protein_coding	protein_coding	pgaptmp_003004	0.4692	1332	GO:0006508	GO:0004176,GO:0005524	GO:0009376	TRUE	2.55082	8.92878e-07	1.12786e-05	Chromosome_I	3251460	3252791	1332	+	13.3094	9692.04	8899.74	7075.39	5635.43	6576.05	3024.06	5324.16	8619.74	7817.36	12919.3	11839	13031.1	32329	34478	33925.8	14636.3	15201.8	15886.5	4504.57	5765	8051.93	299.826	276.131	221.711	227.923	255.273	111.127	190.318	281.208
pgaptmp_002408	pgaptmp_002408	pgaptmp_002408	protein_coding	protein_coding	pgaptmp_002408	0.4667	855				TRUE	1.48211	8.93631e-07	1.12786e-05	Chromosome_I	2619545	2620399	855	-	10.3232	952.09	843.152	971.212	657.264	811.765	877.447	602.133	600.77	535.561	3696.98	3842.31	3764.46	2318.37	2601.69	2435.97	1493.3	1609.79	1678.87	984.065	844.871	955.399	45.8849	40.755	47.4121	41.4131	49.0917	50.2328	33.532	30.5337
pgaptmp_001473	pgaptmp_001473	btuC	protein_coding	protein_coding	pgaptmp_001473	0.491	996		GO:0005524,GO:0022857		TRUE	1.89013	9.07466e-07	1.14029e-05	Chromosome_I	1524877	1525872	996	+	9.94479	737.773	919.722	900.148	616.906	762.609	762.818	619.209	665.698	619.308	1019.09	1121.13	1120.82	2305.11	1656.03	1861.56	1951.73	1941.34	2249.08	506.282	594.468	550.808	30.5226	38.1627	37.7221	33.3675	39.5901	37.4882	29.6013	29.0439
pgaptmp_002556	pgaptmp_002556	lnt	protein_coding	protein_coding	pgaptmp_002556	0.4767	1521	GO:0042158	GO:0016410	GO:0016020	TRUE	1.67746	9.09396e-07	1.14029e-05	Chromosome_I	2758269	2759789	1521	+	11.6638	2992.72	2529.46	2741.28	1837.91	2306.26	1604.81	1569.55	1853.06	1674.95	5194.34	5364.36	5205.78	6280.5	7514.27	7948.2	4602.92	4816.06	4704.55	2301.74	2240.25	2673.45	81.0766	68.7289	75.2256	65.0966	78.4012	51.6447	49.1338	52.9416
pgaptmp_002700	pgaptmp_002700	secD	protein_coding	protein_coding	pgaptmp_002700	0.4777	1857	GO:0006886,GO:0043952	GO:0015450	GO:0031522	TRUE	1.92567	9.09977e-07	1.14029e-05	Chromosome_I	2922258	2924114	1857	-	14.0842	14784	14119.7	13741.5	8745.59	10359.7	8824.78	10375.8	12105.7	11106	28409.5	31710.8	31836.8	42564.3	32949.6	36252.4	25097.8	23993.7	34149	10488.3	9542.07	11277.9	328.048	314.236	308.862	253.712	288.457	232.608	266.038	283.28
pgaptmp_000230	pgaptmp_000230	pgaptmp_000230	protein_coding	protein_coding	pgaptmp_000230	0.5056	888	GO:0055085	GO:0022857	GO:0016020	TRUE	1.91548	9.31698e-07	1.16084e-05	Chromosome_I	248376	249263	888	-	8.35753	280.616	258.754	260.569	224.213	220.522	205.342	178.19	229.113	182.274	411.673	435.389	465	770.334	598.256	723.282	610.128	645.78	601.96	188.878	159.926	222.649	13.0214	12.0425	12.2476	13.6023	12.8405	11.3188	9.55438	11.2118
pgaptmp_000660	pgaptmp_000660	pgaptmp_000660	protein_coding	protein_coding	pgaptmp_000660	0.4546	3141		GO:0022857	GO:0016020	TRUE	1.53149	9.31872e-07	1.16084e-05	Chromosome_I	680964	684104	3141	+	9.76284	740.086	828.19	796.41	568.86	753.051	591.287	677.864	666.444	655.2	898.012	1084.84	1031.89	1545.09	1328.59	1418.9	1575.88	1540.55	1391.78	525.84	546.044	488.499	9.70895	10.8969	10.583	9.75668	12.3965	9.21432	10.2756	9.22005
pgaptmp_001855	pgaptmp_001855	hrpA	protein_coding	protein_coding	pgaptmp_001855	0.481	4017		GO:0003676,GO:0003724,GO:0005524		TRUE	2.44968	9.32993e-07	1.16084e-05	Chromosome_I	1983747	1987763	4017	-	12.1191	4970.91	3253.79	3250.99	1811	2388.19	1505.84	1768.53	3050.12	2852.34	9462.42	9409.85	10500.5	12194.3	10983.9	11385.4	7576.03	8124.85	8489.62	1792.66	1907.65	3034.84	50.9909	33.4757	33.7796	24.2874	30.7405	18.3489	20.9626	32.9953
pgaptmp_004489	pgaptmp_004489	pgaptmp_004489	protein_coding	protein_coding	pgaptmp_004489	0.4304	1545	GO:0000160			TRUE	-1.58463	9.54713e-07	1.18506e-05	Chromosome_II	1365369	1366913	1545	+	8.94583	1008.37	1130.95	1149.28	1180	985.179	840.337	1424.03	1367.22	1439.19	223.998	174.156	207.49	206.208	179.81	191.031	242.703	182.416	148.175	666.661	642.255	581.547	26.8936	30.2522	31.0484	41.1451	32.9709	26.6231	43.8858	38.4545
pgaptmp_003958	pgaptmp_003958	pgaptmp_003958	protein_coding	protein_coding	pgaptmp_003958	0.4524	378				TRUE	-1.97416	9.60621e-07	1.18959e-05	Chromosome_II	726645	727022	378	+	9.9128	1083.15	1341.3	1216.26	1882.11	1723.89	1967.66	2018.74	1819.47	1902.97	484.321	511.582	426.096	360.864	483.932	471.648	534.283	414.098	470.984	2157.57	1712.68	1704.76	118.074	146.648	134.3	268.236	235.81	254.795	254.286	209.166
pgaptmp_000483	pgaptmp_000483	pgaptmp_000483	protein_coding	protein_coding	pgaptmp_000483	0.4876	603	GO:0009143	GO:0047429		TRUE	2.18553	9.73851e-07	1.20314e-05	Chromosome_I	506604	507206	603	-	9.2821	561.232	499.906	454.158	238.947	331.806	211.115	234.617	335.834	347.657	1273.36	1676.25	1506.16	1743.93	1921.3	2080.26	610.128	768.279	918.154	390.608	358.72	578.224	38.3516	34.262	31.4362	21.3476	28.4519	17.137	18.5257	24.2016
pgaptmp_001280	pgaptmp_001280	pgaptmp_001280	protein_coding	protein_coding	pgaptmp_001280	0.4076	579				TRUE	-1.78628	9.76894e-07	1.20407e-05	Chromosome_I	1365359	1365937	579	-	9.72442	2269.6	3029.36	2377.79	1233.81	1079.4	1368.13	2001.66	1438.86	1602.46	401.583	331.984	348.287	334.351	364.059	317.506	426.415	426.082	325.455	1477.49	1121.4	1193	161.521	216.229	171.41	114.798	96.3931	115.659	164.606	107.989
pgaptmp_003119	pgaptmp_003119	hslR	protein_coding	protein_coding	pgaptmp_003119	0.491	387				TRUE	2.02842	9.85509e-07	1.21185e-05	Chromosome_I	3375662	3376048	387	+	10.8915	1594.27	1454.83	1569.13	1401.01	1512.25	865.902	1156.75	1288.86	1270.29	3063.33	3042.28	2571.4	5377.61	6846.09	6910.05	910.135	1430.04	1590.23	1333.88	1715.86	1924.09	169.75	155.362	169.235	195.027	202.048	109.519	142.318	144.721
pgaptmp_002497	pgaptmp_002497	flgN	protein_coding	protein_coding	pgaptmp_002497	0.4577	426	GO:0044780	GO:0005515		TRUE	-1.95046	9.88846e-07	1.21202e-05	Chromosome_I	2715466	2715891	426	+	10.9111	3002.74	3634.88	3616.11	2886.58	2651.04	2508.64	3240.83	2665.78	2648.25	1358.12	1464	1359.8	723.201	899.048	865.567	1055.08	1067.87	800.408	4113.4	3048.16	3131.22	290.447	352.633	354.301	365.038	321.774	288.245	362.225	271.926
pgaptmp_000647	pgaptmp_000647	pgaptmp_000647	protein_coding	protein_coding	pgaptmp_000647	0.4638	1740	GO:0005975	GO:0004553		TRUE	1.85058	9.90247e-07	1.21202e-05	Chromosome_I	663151	664890	1740	-	6.90974	136.453	102.094	133.96	67.2639	92.1685	73.3955	77.2156	90.302	81.6361	141.26	116.104	92.6295	243.031	330.761	272.713	176.971	153.123	199.771	69.8513	75.1846	86.4013	3.23142	2.42488	3.21342	2.08256	2.73891	2.06468	2.11295	2.2552
pgaptmp_000894	pgaptmp_000894	fliG	protein_coding	protein_coding	pgaptmp_000894	0.4981	1056	GO:0006935,GO:0071973	GO:0003774	GO:0009288	TRUE	1.92904	1.02433e-06	1.24997e-05	Chromosome_I	941991	943046	1056	+	10.3638	1397.68	1036.78	1137.03	588.719	718.231	562.424	612.527	765.702	721.353	2350.97	2704.86	2595.48	2794.12	2745.98	2819.35	2300.62	2439.32	2747.85	658.278	681.758	982.814	54.5385	40.5755	44.9416	30.0337	35.1677	26.0695	27.6181	31.5089
pgaptmp_005030	pgaptmp_005030	pgaptmp_005030	protein_coding	protein_coding	pgaptmp_005030	0.4481	549			GO:0016020	TRUE	1.6705	1.026e-06	1.24997e-05	Chromosome_II	1988446	1988994	549	+	10.6836	541.188	504.307	561.98	769.371	911.444	1348.33	706.077	614.949	572.156	5254.88	5950.32	5924.59	3437.78	3096.72	3596.65	5464.18	4637.64	3769.2	1198.09	941.719	1229.56	40.6194	37.9633	42.7257	75.4966	85.8423	120.215	61.2368	48.6748
pgaptmp_001891	pgaptmp_001891	pgaptmp_001891	protein_coding	protein_coding	pgaptmp_001891	0.4579	1260				TRUE	-1.70081	1.03152e-06	1.25378e-05	Chromosome_I	2031773	2033032	1260	+	9.19091	881.936	914.441	939.355	1093.52	992.006	867.551	1095.12	938.843	1042.97	318.845	286.631	196.375	176.75	237.526	209.475	812.38	653.769	467.015	765.57	744.2	708.657	28.8419	29.9935	31.1172	46.7541	40.7087	33.7021	41.3834	32.3787
pgaptmp_000520	pgaptmp_000520	endA	protein_coding	protein_coding	pgaptmp_000520	0.4856	696		GO:0004518		TRUE	1.53781	1.03726e-06	1.25786e-05	Chromosome_I	528479	529174	696	-	10.7061	1378.41	1505	1365.74	971.163	964.697	771.89	956.285	939.589	1026.08	2401.42	2066.28	2206.44	3512.9	4010.2	4139.44	2108.48	2625.73	2500.45	1285.26	1393.46	1579.32	81.607	89.3653	81.9031	75.1704	71.668	54.2849	65.42	58.6632
pgaptmp_002836	pgaptmp_002836	murD	protein_coding	protein_coding	pgaptmp_002836	0.4673	1314	GO:0008360,GO:0009252,GO:0051301	GO:0005524,GO:0008764	GO:0005737	TRUE	1.44433	1.0484e-06	1.26844e-05	Chromosome_I	3083479	3084792	1314	-	12.2758	4278.62	3652.49	4027.79	2597.67	3012.2	2990.25	2776.05	3207.59	3105.69	8183	8473.76	9355.58	9304.4	8536.52	9266.97	7131.08	8135.5	8079.49	3375.77	3462.31	3745.16	134.173	114.877	127.942	106.501	118.531	111.39	100.592	106.077
pgaptmp_002819	pgaptmp_002819	pgaptmp_002819	protein_coding	protein_coding	pgaptmp_002819	0.4815	621				TRUE	1.36258	1.05946e-06	1.27888e-05	Chromosome_I	3061145	3061765	621	+	8.90054	326.871	393.412	333.267	310.695	338.634	388.419	239.814	237.323	242.093	710.337	687.552	635.439	966.231	910.148	915.63	797.211	834.854	800.408	375.52	372.1	391.298	21.6892	26.1817	22.3997	26.953	28.1957	30.6155	18.3872	16.6068
pgaptmp_001656	pgaptmp_001656	yccX	protein_coding	protein_coding	pgaptmp_001656	0.4579	273		GO:0003998		TRUE	-1.44252	1.06775e-06	1.28594e-05	Chromosome_I	1742899	1743171	273	+	8.00204	435.571	484.944	520.321	436.895	443.774	456.866	472.945	414.942	389.883	113.008	121.546	187.112	135.508	130.972	125.158	101.126	107.852	124.361	400.667	384.843	392.129	65.7438	73.4127	79.5518	86.2142	84.0511	81.9142	82.4861	66.0483
pgaptmp_003252	pgaptmp_003252	atpE	protein_coding	protein_coding	pgaptmp_003252	0.4471	255	GO:0015986	GO:0015078		TRUE	2.35989	1.0764e-06	1.29092e-05	Chromosome_I	3521191	3521445	255	-	14.8382	28624.4	18882.9	17426.3	9826.94	12683.1	7524.28	9391.34	21275.5	16455.3	80883.6	81971.1	101631	66798.1	56707.8	62449.9	83783	80287.1	101105	11160	10810	16663	4625.45	3060.34	2852.37	2076.07	2571.75	1444.3	1753.56	3625.57
pgaptmp_005089	pgaptmp_005089	pgaptmp_005089	protein_coding	protein_coding	pgaptmp_005089	0.4885	477		GO:0008113		TRUE	-1.71457	1.07679e-06	1.29092e-05	Chromosome_II	2050456	2050932	477	+	6.66479	121.806	129.377	133.143	283.79	199.357	228.433	213.085	213.441	194.238	60.5401	21.7695	50.02	47.1332	61.0465	55.3331	37.0796	21.3041	54.2426	193.907	215.359	225.142	10.5222	11.2094	11.6504	32.0511	21.6101	23.4409	21.27	19.4445
pgaptmp_001268	pgaptmp_001268	pgaptmp_001268	protein_coding	protein_coding	pgaptmp_001268	0.487	1041				TRUE	1.43378	1.08401e-06	1.29663e-05	Chromosome_I	1355903	1356943	1041	+	8.49328	314.536	285.158	312.029	225.494	178.875	208.641	250.208	312.699	312.469	437.907	408.177	502.052	661.338	645.983	663.997	551.137	591.189	597.991	231.347	252.314	276.65	12.4503	11.3208	12.5108	11.6694	8.88471	9.81029	11.4441	13.0531
pgaptmp_004813	pgaptmp_004813	mngA	protein_coding	protein_coding	pgaptmp_004813	0.4972	1935	GO:0009401	GO:0005351,GO:0022877	GO:0016020	TRUE	-1.92215	1.09208e-06	1.30332e-05	Chromosome_II	1738695	1740629	1935	+	7.1247	249.779	278.997	282.623	297.883	268.995	188.849	435.08	464.944	413.107	40.3601	34.4683	42.6096	47.1332	51.0571	51.3807	80.9009	62.5808	84.6713	181.613	239.571	258.373	5.31904	5.95882	6.09633	8.29333	7.188	4.77713	10.7058	10.4414
pgaptmp_002033	pgaptmp_002033	hisF	protein_coding	protein_coding	pgaptmp_002033	0.4793	774	GO:0000105	GO:0000107		TRUE	2.26681	1.09501e-06	1.30385e-05	Chromosome_I	2198593	2199366	774	-	7.98922	356.937	210.348	221.361	135.809	143.373	106.382	109.884	218.665	206.202	401.583	380.966	413.128	648.082	744.767	633.695	262.928	378.148	325.455	124.056	114.688	191.08	19.0024	11.2315	11.9372	9.45261	9.57791	6.72761	6.75966	12.2765
pgaptmp_002976	pgaptmp_002976	rpmJ	protein_coding	protein_coding	pgaptmp_002976	0.4474	114	GO:0006412	GO:0003735	GO:0005840	TRUE	3.01569	1.09772e-06	1.30413e-05	Chromosome_I	3234779	3234892	114	-	15.0781	30835.4	20904.5	17335.6	11432.9	13708.5	8635.11	10046.2	20947.1	18689	129035	107494	142053	106639	91130.2	93507.6	104160	94132.1	106961	9987.06	10181.8	18303.8	11145.6	7578.4	6347.09	5402.78	6217.7	3707.62	4195.94	7984.66
pgaptmp_000705	pgaptmp_000705	radA	protein_coding	protein_coding	pgaptmp_000705	0.4891	1380	GO:0006281	GO:0003684,GO:0005524		TRUE	1.76837	1.10128e-06	1.30542e-05	Chromosome_I	731873	733252	1380	+	11.2256	2466.95	2053.31	1719.43	1356.17	1656.3	1095.16	1179.76	1598.57	1575.72	3892.73	3900.36	4307.27	5299.54	4952.54	4885.12	3261.32	3533.82	3935.89	1352.32	1456.54	1910.8	73.6614	61.4919	52.0051	52.9418	62.0589	38.8447	40.7051	50.3373
pgaptmp_000758	pgaptmp_000758	pgaptmp_000758	protein_coding	protein_coding	pgaptmp_000758	0.4359	1824				TRUE	-1.56278	1.10553e-06	1.30669e-05	Chromosome_I	796793	798616	1824	-	9.68294	1544.16	1800.72	1780.69	1140.92	1161.32	1101.76	1699.48	1579.91	1620.05	429.835	542.422	431.654	369.701	409.567	447.934	330.345	336.871	301.642	1249.5	1418.31	1236.2	34.8839	40.8002	40.7479	33.6974	32.9209	29.5661	44.3634	37.6397
pgaptmp_004994	pgaptmp_004994	pgaptmp_004994	protein_coding	protein_coding	pgaptmp_004994	0.453	1395				TRUE	-1.57183	1.10732e-06	1.30669e-05	Chromosome_II	1946654	1948048	1395	+	9.50366	938.213	1160.87	1110.89	1241.5	1281.48	1126.5	1245.84	1335.87	1358.26	452.033	520.653	463.148	349.081	401.797	342.538	320.233	278.285	317.517	1055.59	1248.19	1209.62	27.7131	34.3916	33.2382	47.9443	47.4988	39.5265	42.5228	41.6129
pgaptmp_002051	pgaptmp_002051	pgaptmp_002051	protein_coding	protein_coding	pgaptmp_002051	0.4307	822				TRUE	3.55938	1.11145e-06	1.30862e-05	Chromosome_I	2216730	2217551	822	-	7.90636	215.087	118.816	139.678	74.9512	118.795	62.6748	73.5033	147.767	140.048	328.935	790.957	433.506	1355.08	735.888	781.25	566.306	1351.48	924.769	56.9986	70.7245	109.663	10.7821	5.97371	7.09247	4.91214	7.47257	3.73211	4.25763	7.81165
pgaptmp_000629	pgaptmp_000629	pcnB	protein_coding	protein_coding	pgaptmp_000629	0.4803	1368	GO:0043633	GO:0003723,GO:1990817		TRUE	2.50756	1.12535e-06	1.32203e-05	Chromosome_I	635913	637280	1368	-	11.3846	2631.93	1943.3	1828.07	1227.41	1573.69	967.336	1172.34	1770.96	1709.43	5797.72	5420.6	5348.43	7311.54	8950.53	8336.85	3224.24	3646.99	4212.4	1264.59	1232.9	2100.22	79.2769	58.7077	55.776	48.3355	59.4809	34.6118	40.8038	56.255
pgaptmp_001935	pgaptmp_001935	pgaptmp_001935	protein_coding	protein_coding	pgaptmp_001935	0.418	921				TRUE	-1.59835	1.13717e-06	1.33294e-05	Chromosome_I	2086187	2087107	921	+	12.4637	9195.57	11873.7	12188.7	8283.07	8750.54	9725.32	11918.7	10708.6	10329.1	2800.99	2993.3	2927.09	2942.88	2921.35	2526.88	2314.1	2406.03	2287.45	9707.65	8808.7	8560.37	411.412	532.803	552.383	484.502	491.269	516.865	616.17	505.256
pgaptmp_002680	pgaptmp_002680	bamB	protein_coding	protein_coding	pgaptmp_002680	0.4634	1161		GO:0005515		TRUE	1.65983	1.14207e-06	1.33571e-05	Chromosome_I	2903839	2904999	1161	-	12.8628	6168.92	5476.09	5574.87	4021.74	4736.09	3744	4248.34	5172.59	4919.28	12301.7	12724.2	14589.2	13502.2	13476.8	14124.4	13116.1	12940.9	14756.6	4070.37	4401.48	5366.85	218.945	194.93	200.421	186.615	210.927	157.847	174.229	193.604
pgaptmp_003294	pgaptmp_003294	pgaptmp_003294	protein_coding	protein_coding	pgaptmp_003294	0.4268	396				TRUE	-1.80528	1.14703e-06	1.33854e-05	Chromosome_II	31408	31803	396	+	6.08604	91.7398	110.895	88.2177	163.355	182.289	108.856	128.445	132.095	148.493	58.5221	29.0259	20.3785	23.5666	27.7484	32.9363	20.2252	34.6192	25.1368	120.144	123.609	137.079	9.54599	11.5733	9.29826	22.223	23.8017	13.4552	15.4438	14.4953
pgaptmp_002927	pgaptmp_002927	pgaptmp_002927	protein_coding	protein_coding	pgaptmp_002927	0.4632	801				TRUE	-1.65285	1.15343e-06	1.3418e-05	Chromosome_I	3185453	3186253	801	-	11.9127	6384.78	8036.35	9124.82	5641.2	5771.11	5855.97	8683.78	8381.67	7613.27	1570.01	1944.74	1961.89	1617.26	1385.2	1580.94	2521.41	2459.29	2333.75	5036.56	5716.58	4610.84	328.452	414.637	475.48	379.405	372.538	357.849	516.189	454.711
pgaptmp_001523	pgaptmp_001523	pgaptmp_001523	protein_coding	protein_coding	pgaptmp_001523	0.4538	465		GO:0003677		TRUE	-1.8634	1.15492e-06	1.3418e-05	Chromosome_I	1583181	1583645	465	-	9.04824	1235.79	1685.42	1786.41	826.385	663.613	997.024	1047.61	840.331	780.469	324.899	306.587	337.172	207.681	205.338	183.126	210.679	213.041	189.187	891.861	823.844	657.148	109.509	149.795	160.35	95.7401	73.7914	104.951	107.27	78.5299
pgaptmp_004276	pgaptmp_004276	pgaptmp_004276	protein_coding	protein_coding	pgaptmp_004276	0.4582	3060		GO:0022857	GO:0016020	TRUE	1.73513	1.16559e-06	1.34835e-05	Chromosome_II	1125988	1129047	3060	+	10.2597	893.499	870.436	864.207	494.55	576.224	628.397	762.504	858.243	761.468	2708.16	3238.21	3017.87	2648.3	2142.18	2051.28	2116.91	2360.76	2041.37	661.072	695.776	814.997	12.0318	11.7559	11.7879	8.70669	9.73674	10.0518	11.8646	12.1878
pgaptmp_004747	pgaptmp_004747	pgaptmp_004747	protein_coding	protein_coding	pgaptmp_004747	0.4378	1005				TRUE	-1.35661	1.16568e-06	1.34835e-05	Chromosome_II	1666334	1667338	1005	-	11.4413	2909.46	3120.89	3269.77	4611.1	3961.88	3815.74	4955.16	5365.14	5135.33	1854.55	1792.35	1763.67	1388.96	1471.78	1545.37	2132.08	1655.06	1770.16	3943.52	4134.51	3957.84	119.29	128.338	135.798	247.174	203.835	185.843	234.76	231.981
pgaptmp_000983	pgaptmp_000983	pgaptmp_000983	protein_coding	protein_coding	pgaptmp_000983	0.4652	948				TRUE	-1.84201	1.16959e-06	1.3499e-05	Chromosome_I	1039617	1040564	948	-	9.72985	794.821	858.114	893.613	1544.51	1426.22	1167.73	683.061	664.205	593.973	736.571	823.611	629.881	425.672	602.695	578.362	542.71	525.945	523.904	2017.3	1894.27	2292.13	34.5477	37.4092	39.3443	87.7699	77.7898	60.293	34.3071	30.4461
pgaptmp_002977	pgaptmp_002977	secY	protein_coding	protein_coding	pgaptmp_002977	0.4472	1335	GO:0015031,GO:0043952		GO:0016020	TRUE	2.74083	1.17532e-06	1.35203e-05	Chromosome_I	3234931	3236265	1335	-	17.8711	229572	172102	143649	80418.8	113482	73700.6	92640.1	173293	144666	661584	672504	776958	682971	544109	593134	562214	542884	536030	82081.9	82538.6	125993	7085.92	5327.79	4491.19	3245.19	4395.31	2702.23	3304.08	5640.77
pgaptmp_001032	pgaptmp_001032	uvrB	protein_coding	protein_coding	pgaptmp_001032	0.4673	2031	GO:0006289	GO:0003677,GO:0005515,GO:0005524,GO:0016787,GO:0016887	GO:0009380	TRUE	1.50711	1.17657e-06	1.35203e-05	Chromosome_I	1094054	1096084	2031	+	11.6598	4988.64	4455.15	4098.04	2053.79	2373.17	1680.67	2188.76	3190.42	2762.26	3547.65	3515.77	3720	5918.17	5204.49	5503	3347.27	3818.76	3998.07	1860.28	2081.59	2268.86	101.212	90.6555	84.2184	54.4767	60.4174	40.5048	51.3123	68.2615
pgaptmp_003729	pgaptmp_003729	pgaptmp_003729	protein_coding	protein_coding	pgaptmp_003729	0.4146	246				TRUE	-1.90407	1.188e-06	1.36219e-05	Chromosome_II	487726	487971	246	+	7.79819	310.682	364.368	325.916	653.421	579.637	750.448	857.538	595.546	669.275	70.6301	126.989	66.6933	50.0791	62.1564	47.4283	239.332	159.781	108.485	264.317	234.474	211.018	52.0402	61.2135	55.2982	143.094	121.833	149.32	165.978	105.2
pgaptmp_000926	pgaptmp_000926	pgaptmp_000926	protein_coding	protein_coding	pgaptmp_000926	0.4739	555	GO:0017004	GO:0015036	GO:0030288	TRUE	1.65299	1.22172e-06	1.39745e-05	Chromosome_I	972171	972725	555	+	10.7914	2069.16	1648.46	1609.97	1103.77	1101.24	933.525	1121.11	1792.61	1504.64	2042.22	2037.26	2173.09	3281.65	3077.85	3236.98	2551.75	2806.81	3369.65	897.449	1080.62	1255.31	153.624	122.751	121.078	107.139	102.597	82.3314	96.1808	140.356
pgaptmp_000777	pgaptmp_000777	pgaptmp_000777	protein_coding	protein_coding	pgaptmp_000777	0.4359	663	GO:0045892	GO:0016989		TRUE	2.38119	1.22406e-06	1.39745e-05	Chromosome_I	822772	823434	663	+	9.79266	417.069	413.655	460.693	458.035	388.473	365.328	373.456	360.462	362.436	1481.21	2730.25	1767.37	3079.86	1769.24	2478.13	2191.07	4061.09	3060.07	491.194	529.478	451.945	25.9211	25.785	29.0027	37.2177	30.2964	26.9713	26.82	23.6256
pgaptmp_003611	pgaptmp_003611	pgaptmp_003611	protein_coding	protein_coding	pgaptmp_003611	0.4793	726		GO:0005524,GO:0016887,GO:0042626,GO:0140359		TRUE	1.79404	1.24011e-06	1.41271e-05	Chromosome_II	360087	360812	726	+	5.34294	37.7752	22.883	18.7871	26.9056	30.7228	24.7401	20.7888	34.3297	42.2256	48.4321	32.6542	40.757	120.779	119.873	119.888	50.5631	45.2712	46.3046	30.7346	24.8491	36.5544	2.14402	1.30262	1.0801	1.9965	2.18811	1.668	1.36341	2.05481
pgaptmp_002562	pgaptmp_002562	rlmH	protein_coding	protein_coding	pgaptmp_002562	0.4904	471	GO:0006364	GO:0008168		TRUE	1.41972	1.24806e-06	1.41869e-05	Chromosome_I	2765205	2765675	471	+	10.5721	1133.26	1055.26	1089.65	946.179	1149.72	1084.44	724.638	844.063	700.944	2869.6	3238.21	3599.58	3227.15	2712.68	3045.95	1774.76	1962.64	1967.28	1189.71	1189.57	1175.56	99.1438	92.5934	96.5624	108.222	126.216	112.698	73.2543	77.8738
pgaptmp_001465	pgaptmp_001465	pgaptmp_001465	protein_coding	protein_coding	pgaptmp_001465	0.444	696				TRUE	-1.45175	1.25272e-06	1.42092e-05	Chromosome_I	1516617	1517312	696	-	8.30049	558.148	675.05	746.583	461.879	374.818	432.951	629.604	512.707	515.152	135.206	161.457	138.944	136.981	150.951	155.46	224.163	211.709	191.833	452.636	456.842	426.191	33.0444	40.0837	44.7724	35.7506	27.8455	30.4482	43.0716	32.0108
pgaptmp_004882	pgaptmp_004882	pgaptmp_004882	protein_coding	protein_coding	pgaptmp_004882	0.4522	984		GO:0004197		TRUE	-2.68498	1.27193e-06	1.43425e-05	Chromosome_II	1815461	1816444	984	+	10.3007	2044.49	1783.12	1801.11	2157.57	2604.61	1180.93	2039.53	3286.7	3016.31	791.057	1191.88	978.168	360.864	435.095	461.109	397.763	452.712	541.103	2043.01	2736.59	3996.89	85.6145	74.8904	76.3988	118.123	136.865	58.7435	98.6888	145.145
pgaptmp_003120	pgaptmp_003120	hslO	protein_coding	protein_coding	pgaptmp_003120	0.4566	876	GO:0006457	GO:0051082		TRUE	1.64574	1.27358e-06	1.43425e-05	Chromosome_I	3376080	3376955	876	+	12.5783	4806.7	4718.31	5007.99	4102.46	3982.36	3012.51	3913.49	4021.05	4188.78	7666.4	7397.99	7701.22	12519.8	15724.5	15701.4	7806.94	7725.4	8869.32	4752.68	4938.61	5226.45	226.1	222.599	238.616	252.292	235.061	168.329	212.713	199.468
pgaptmp_004154	pgaptmp_004154	tssC	protein_coding	protein_coding	pgaptmp_004154	0.4573	1476	GO:0033103	GO:0003674	GO:0033104	TRUE	-3.02612	1.27551e-06	1.43425e-05	Chromosome_II	991158	992633	1476	+	7.48684	132.599	75.6901	73.5148	172.964	189.799	84.1162	260.603	367.179	350.472	159.422	99.7767	113.008	111.941	145.402	77.7298	129.779	111.846	78.0564	772.276	1005.43	1340.05	3.70178	2.11931	2.07888	6.31298	6.64892	2.7895	8.40669	10.8101
pgaptmp_000915	pgaptmp_000915	pgaptmp_000915	protein_coding	protein_coding	pgaptmp_000915	0.4875	1116	GO:0006482,GO:0006935,GO:0018277	GO:0000156,GO:0008984,GO:0050568	GO:0005737	TRUE	2.12102	1.28028e-06	1.43425e-05	Chromosome_I	963109	964224	1116	+	12.378	5353.29	4598.61	4458.26	1992.29	3154.89	2378.34	2982.45	4578.54	3565.25	7728.95	10685.2	10559.8	11580	8219.08	9443.51	12406.5	12062.1	14412.6	2091.63	2156.14	2901.92	197.658	170.296	166.741	96.173	146.172	104.314	127.245	178.279
pgaptmp_000774	pgaptmp_000774	pgaptmp_000774	protein_coding	protein_coding	pgaptmp_000774	0.4657	597				TRUE	3.93036	1.28072e-06	1.43425e-05	Chromosome_I	820215	820811	597	+	7.01496	39.3171	52.807	46.5594	39.0771	36.1847	44.5321	39.3502	35.8223	37.2993	199.782	741.976	452.032	1110.58	429.545	721.965	402.819	954.69	722.352	53.6458	44.601	33.2313	2.71372	3.6556	3.25517	3.52624	3.13396	3.65117	3.13838	2.60745
pgaptmp_003864	pgaptmp_003864	pgaptmp_003864	protein_coding	protein_coding	pgaptmp_003864	0.4336	708				TRUE	-1.8937	1.28082e-06	1.43425e-05	Chromosome_II	631232	631939	708	-	8.35637	654.513	742.819	872.375	671.998	643.131	573.145	971.877	795.554	847.326	102.918	126.989	105.598	122.252	182.03	167.317	92.699	83.8849	82.0253	602.956	693.227	643.856	38.0929	43.3602	51.4294	51.1328	46.9689	39.6245	65.3598	48.8285
pgaptmp_004708	pgaptmp_004708	choW	protein_coding	protein_coding	pgaptmp_004708	0.4792	843	GO:0055085		GO:0016020	TRUE	1.55605	1.2949e-06	1.44694e-05	Chromosome_II	1624544	1625386	843	-	6.47988	43.9426	39.6053	42.4752	57.6548	66.2248	57.7268	52.7145	86.5705	77.4135	131.17	137.873	96.3347	169.385	176.48	163.364	215.736	199.726	193.156	50.2929	55.4327	61.4778	2.14791	1.94163	2.10305	3.68444	4.06197	3.35184	2.97739	4.46252
pgaptmp_003617	pgaptmp_003617	emrD	protein_coding	protein_coding	pgaptmp_003617	0.4925	1206	GO:0042908	GO:0042910	GO:0016020	TRUE	1.47652	1.2996e-06	1.4491e-05	Chromosome_II	366395	367600	1206	-	11.3569	883.477	1038.54	1103.54	1335.03	1637.87	2299.18	1441.11	1141.84	1126.02	5349.73	6284.12	6493.33	5364.35	4407.56	5292.21	7860.87	7280.67	5966.68	1913.37	1892.99	1933.23	30.1861	35.5891	38.1928	59.6358	70.2224	93.3163	56.8961	41.1428
pgaptmp_000963	pgaptmp_000963	pgaptmp_000963	protein_coding	protein_coding	pgaptmp_000963	0.4485	330	GO:0008150	GO:0003677		TRUE	1.52319	1.31385e-06	1.4619e-05	Chromosome_I	1016740	1017069	330	+	12.8734	3999.55	4480.67	5184.43	3984.59	3536.54	5615.17	4399.06	3801.64	3515.28	12491.4	11659.4	13340.5	14005.9	13177.2	15594.7	20929.7	18156.4	17873.6	5411.52	5262.92	5124.26	499.408	561.14	655.734	650.479	554.126	832.878	634.715	500.604
pgaptmp_004305	pgaptmp_004305	pgaptmp_004305	protein_coding	protein_coding	pgaptmp_004305	0.4121	597	GO:0006633	GO:0008770		TRUE	-1.73782	1.32096e-06	1.46671e-05	Chromosome_II	1162114	1162710	597	+	9.60802	790.967	1006.85	1015.32	1614.97	1152.45	1385.44	1783.38	1279.15	1454.67	296.647	232.208	231.574	306.366	417.336	424.22	773.615	631.134	693.246	1442.85	1345.68	1345.04	54.5936	69.7001	70.9855	145.732	99.8138	113.592	142.234	93.1078
pgaptmp_004873	pgaptmp_004873	pgaptmp_004873	protein_coding	protein_coding	pgaptmp_004873	0.5024	414				TRUE	-1.67633	1.32986e-06	1.47349e-05	Chromosome_II	1803311	1803724	414	+	6.43401	100.991	117.056	67.797	146.699	128.353	98.9602	148.491	117.169	104.156	68.6121	45.353	42.6096	51.552	66.5962	64.5552	28.6524	39.9452	33.0747	232.465	207.076	242.588	10.0517	11.6851	6.83519	19.0894	16.0306	11.7002	17.0779	12.2984
pgaptmp_000877	pgaptmp_000877	pgaptmp_000877	protein_coding	protein_coding	pgaptmp_000877	0.4383	486				TRUE	-1.29517	1.33293e-06	1.47378e-05	Chromosome_I	922029	922514	486	+	11.3306	4038.86	4364.5	4827.47	3378.57	3264.81	2579.56	3354.42	3142.66	3243.63	1511.48	2024.56	1593.23	1531.83	1535.04	1487.41	1762.97	1559.19	1726.5	3873.11	4000.71	4055.04	342.437	371.142	414.595	374.508	347.349	259.802	328.635	280.995
pgaptmp_000204	pgaptmp_000204	pgaptmp_000204	protein_coding	protein_coding	pgaptmp_000204	0.4529	510				TRUE	-1.97958	1.36103e-06	1.5017e-05	Chromosome_I	222218	222727	510	+	8.62151	281.387	354.687	445.99	338.241	330.441	534.385	498.931	405.24	365.251	201.8	261.234	214.901	312.258	235.307	301.697	320.233	387.468	283.12	1427.2	1144.97	1057.58	22.7348	28.742	36.5002	35.729	33.5018	51.2882	46.5804	34.5286
pgaptmp_004234	pgaptmp_004234	cyoA	protein_coding	protein_coding	pgaptmp_004234	0.4807	882	GO:0015990	GO:0009486	GO:0016020	TRUE	1.9652	1.36816e-06	1.50584e-05	Chromosome_II	1085399	1086280	882	+	12.5619	3809.13	2638.59	2840.94	2773.19	3419.79	2290.1	3427.93	5460.66	5498.47	21352.5	19440.1	17505.1	12032.2	14318.2	12882.1	6981.07	8090.23	10188.3	3037.13	3207.45	4450.5	177.957	123.636	134.442	169.385	200.482	127.092	185.053	269.038
pgaptmp_000828	pgaptmp_000828	ispC	protein_coding	protein_coding	pgaptmp_000828	0.4627	1206	GO:0008299	GO:0005515,GO:0030604,GO:0046872,GO:0070402		TRUE	1.66679	1.3758e-06	1.50584e-05	Chromosome_I	872775	873980	1206	+	11.8939	3520.03	3081.29	3201.98	2145.4	2672.2	1881.07	1940.04	2413.53	2290.74	6245.72	6661.45	6971.3	7603.18	7505.39	7904.72	5373.17	5697.51	5798.66	2271	2342.83	3093	120.27	105.591	110.818	95.8351	114.569	76.3467	76.5943	86.9646
pgaptmp_005202	pgaptmp_005202	nfsA	protein_coding	protein_coding	pgaptmp_005202	0.4398	723		GO:0016491		TRUE	-1.74674	1.37617e-06	1.50584e-05	Chromosome_II	2172908	2173630	723	+	9.59362	834.138	1083.42	1039.01	1589.35	1394.13	1759.84	1923.71	1497.07	1768.55	349.115	469.857	314.94	300.474	370.719	371.522	392.706	354.181	392.928	1430.55	1232.9	1116.57	47.5399	61.9301	59.9821	118.426	99.7034	119.143	126.687	89.9792
pgaptmp_002188	pgaptmp_002188	pgaptmp_002188	protein_coding	protein_coding	pgaptmp_002188	0.4076	1494				TRUE	-1.54401	1.37623e-06	1.50584e-05	Chromosome_I	2368459	2369952	1494	-	8.54342	732.377	926.763	876.459	753.356	678.633	656.436	995.635	861.974	902.923	153.368	186.855	116.713	164.966	136.522	150.19	190.454	171.764	146.852	467.724	449.196	535.023	20.1996	25.6366	24.4862	27.1652	23.487	21.5067	31.7309	25.0715
pgaptmp_000232	pgaptmp_000232	pgaptmp_000232	protein_coding	protein_coding	pgaptmp_000232	0.4562	1416	GO:0006820	GO:0008509	GO:0016020	TRUE	-1.65761	1.39578e-06	1.52232e-05	Chromosome_I	251546	252961	1416	-	9.83308	2454.62	2366.63	2500.32	1475.96	1446.02	1426.68	2169.46	2120.98	2181.65	290.593	361.01	320.498	371.174	391.808	329.363	460.124	455.375	497.444	1113.71	1406.84	1202.97	71.4297	69.0732	73.701	56.1534	52.8026	49.3168	72.9493	65.0894
pgaptmp_002427	pgaptmp_002427	odhB	protein_coding	protein_coding	pgaptmp_002427	0.4715	1209	GO:0006099	GO:0004149	GO:0045252	TRUE	2.52721	1.39708e-06	1.52232e-05	Chromosome_I	2640936	2642144	1209	-	10.6718	2170.92	1211.04	1104.36	647.015	819.958	357.082	636.286	1356.02	1194.98	2853.46	3127.55	2797.41	4054.93	4569.61	4356.82	3460.2	3079.77	5233.74	591.78	679.847	1113.25	73.9904	41.3975	38.1262	28.8305	35.0679	14.4569	25.0587	48.7392
pgaptmp_003418	pgaptmp_003418	pgaptmp_003418	protein_coding	protein_coding	pgaptmp_003418	0.449	813	GO:0006355	GO:0003700,GO:0043565		TRUE	-1.74163	1.41079e-06	1.52884e-05	Chromosome_II	164824	165636	813	+	10.1926	1032.27	1177.6	1572.4	1956.42	1360	1586.66	2406.3	2063.51	2049.35	641.725	696.623	718.805	465.441	617.125	663.997	856.201	864.147	784.533	2056.98	2189.27	2022.95	52.319	59.8615	80.726	129.639	86.4951	95.5271	140.927	110.295
pgaptmp_000876	pgaptmp_000876	pgaptmp_000876	protein_coding	protein_coding	pgaptmp_000876	0.4435	354				TRUE	-2.71148	1.41261e-06	1.52884e-05	Chromosome_I	921531	921884	354	-	8.62984	883.477	1052.62	1068.41	1106.97	1168.83	541.807	919.162	844.063	1026.79	96.8642	139.687	133.387	122.252	162.051	134.38	89.3281	149.129	95.2552	715.277	1348.22	1006.91	102.837	122.888	125.973	168.46	170.723	74.916	123.629	103.612
pgaptmp_001262	pgaptmp_001262	pgaptmp_001262	protein_coding	protein_coding	pgaptmp_001262	0.4407	540				TRUE	-1.49929	1.41441e-06	1.52884e-05	Chromosome_I	1348447	1348986	540	+	7.61076	522.686	559.754	586.485	337.601	327.027	266.368	524.917	537.334	526.412	32.2881	87.0778	74.1036	86.9019	91.0148	98.809	79.2155	61.2493	74.0874	290.022	311.57	278.312	39.8846	42.8396	45.3319	33.6801	31.3137	24.1447	46.2839	43.2403
pgaptmp_005242	pgaptmp_005242	pgaptmp_005242	protein_coding	protein_coding	pgaptmp_005242	0.5051	1176				TRUE	1.73675	1.41468e-06	1.52884e-05	Chromosome_II	2219825	2221000	1176	-	4.27252	6.16738	14.962	8.98514	10.8903	12.9719	4.94801	8.16703	8.95557	10.5564	32.2881	19.9553	31.494	54.4978	55.4968	65.8727	48.8776	34.6192	41.0127	13.4114	11.4688	12.4617	0.216098	0.525804	0.318903	0.498883	0.570347	0.205947	0.330666	0.33092
pgaptmp_001474	pgaptmp_001474	btuD	protein_coding	protein_coding	pgaptmp_001474	0.4766	768	GO:0015889	GO:0005524		TRUE	1.47522	1.42357e-06	1.5353e-05	Chromosome_I	1525859	1526626	768	+	8.99965	499.558	463.822	526.039	354.897	370.039	317.497	336.333	352.999	344.138	583.203	580.519	516.873	910.261	950.106	941.98	782.042	825.534	908.893	307.346	381.02	367.205	26.803	24.9592	28.5889	24.8946	24.9133	20.2354	20.8517	19.9733
pgaptmp_003365	pgaptmp_003365	pgaptmp_003365	protein_coding	protein_coding	pgaptmp_003365	0.491	1662			GO:0098561	TRUE	1.47431	1.434e-06	1.54338e-05	Chromosome_II	100840	102501	1662	+	8.20473	174.999	154.02	160.099	256.884	273.092	274.615	218.282	231.352	229.426	262.34	426.319	313.088	624.515	543.869	638.965	391.021	450.049	468.338	236.936	205.802	231.788	4.33874	3.82991	4.02067	8.32665	8.49614	8.08771	6.25346	6.04895
pgaptmp_003171	pgaptmp_003171	edd	protein_coding	protein_coding	pgaptmp_003171	0.5214	1797	GO:0009255	GO:0004456		TRUE	1.88256	1.44658e-06	1.55375e-05	Chromosome_I	3437890	3439686	1797	+	11.9592	2190.19	1680.14	1856.66	1177.44	1411.88	1285.66	1461.9	1820.97	1889.59	5763.42	7363.52	8090.26	8862.52	8340.06	11309	15507.7	16755.7	36097.8	2638.7	2382.33	3190.2	50.2218	38.6402	43.1245	35.2983	40.6251	35.0195	38.7348	44.0343
pgaptmp_002573	pgaptmp_002573	pgaptmp_002573	protein_coding	protein_coding	pgaptmp_002573	0.4367	900				TRUE	-1.57994	1.45082e-06	1.55495e-05	Chromosome_I	2777748	2778647	900	+	14.2944	31026.6	32355.7	34832.1	30035.6	28250.7	29069.6	30975.3	29301.1	31244.1	12323.9	12891.1	11545.3	10531.3	10337.9	10898	10879.5	11783.8	8895.78	31236.4	32720.6	37194.9	1420.53	1485.77	1615.39	1797.87	1623.04	1580.99	1638.72	1414.75
pgaptmp_003718	pgaptmp_003718	pgaptmp_003718	protein_coding	protein_coding	pgaptmp_003718	0.4848	1122	GO:0071973	GO:0005198	GO:0009428,GO:0030288	TRUE	1.88795	1.45361e-06	1.55495e-05	Chromosome_II	474014	475135	1122	+	5.19587	24.6695	19.3626	26.9554	32.671	33.4537	17.318	25.2435	26.8667	26.7429	48.4321	56.2378	55.5777	108.996	113.214	96.1741	23.5961	41.2767	34.3977	18.9995	25.4863	28.2466	0.905996	0.713201	1.00275	1.56868	1.54169	0.755507	1.07125	1.04054
pgaptmp_002984	pgaptmp_002984	rpsN	protein_coding	protein_coding	pgaptmp_002984	0.4673	306	GO:0006412	GO:0003735	GO:0005840	TRUE	2.64279	1.47413e-06	1.5717e-05	Chromosome_I	3238759	3239064	306	-	15.9838	68632.2	48798.1	40394.7	20504.6	28480.7	16153.6	22848.4	45881.6	37867.9	189030	181407	229080	171608	170473	177808	132583	132282	129108	23975.8	24178.2	40702.5	9241.97	6590.57	5509.91	3609.89	4812.53	2583.93	3555.22	6515.61
pgaptmp_000162	pgaptmp_000162	purD	protein_coding	protein_coding	pgaptmp_000162	0.4907	1290	GO:0009113	GO:0004637		TRUE	1.31335	1.47524e-06	1.5717e-05	Chromosome_I	167611	168900	1290	-	9.28925	557.377	471.743	456.608	513.768	525.019	370.276	343.758	372.403	439.85	906.084	838.124	887.391	1128.25	1149.89	1150.14	714.625	909.419	1022.67	454.313	479.779	518.408	17.804	15.1132	14.7739	21.4556	21.044	14.0498	12.6881	12.5447
pgaptmp_002095	pgaptmp_002095	pgaptmp_002095	protein_coding	protein_coding	pgaptmp_002095	0.4792	720		GO:0003677,GO:0003700		TRUE	-1.41805	1.48051e-06	1.57413e-05	Chromosome_I	2271676	2272395	720	+	11.4481	6925.2	7646.46	6399.05	4571.38	4122.32	3053.75	5766.67	5830.83	6068.52	1331.88	1268.07	1456.14	1558.34	1454.02	1445.25	886.539	985.314	1099.4	3912.23	4595.18	4205.42	396.331	438.904	370.957	342.042	296.042	207.603	381.351	351.913
pgaptmp_004151	pgaptmp_004151	pgaptmp_004151	protein_coding	protein_coding	pgaptmp_004151	0.4343	2001				TRUE	-1.58171	1.48506e-06	1.57578e-05	Chromosome_II	987039	989039	2001	+	6.87261	67.8412	84.4912	78.4158	158.23	148.152	124.525	152.946	129.856	182.977	102.918	96.1484	68.5459	86.9019	89.9048	75.0949	77.53	103.857	64.8265	274.376	266.332	316.528	1.39703	1.74504	1.63568	4.25997	3.82829	3.04609	3.63935	2.82002
pgaptmp_002165	pgaptmp_002165	sctU	protein_coding	protein_coding	pgaptmp_002165	0.4454	1053	GO:0009306,GO:0030254		GO:0016020	TRUE	-1.37546	1.49886e-06	1.58723e-05	Chromosome_I	2347722	2348774	1053	+	8.56051	380.065	449.74	475.396	390.771	352.971	489.028	423.201	364.193	385.66	345.079	382.78	416.833	195.898	216.438	205.523	337.087	358.175	330.747	604.074	550.504	594.009	14.8726	17.6512	18.8438	19.9921	17.3322	22.732	19.136	15.0294
pgaptmp_002052	pgaptmp_002052	pgaptmp_002052	protein_coding	protein_coding	pgaptmp_002052	0.4401	1311				TRUE	2.88399	1.50226e-06	1.58763e-05	Chromosome_I	2217553	2218863	1311	-	9.14652	597.465	406.614	418.217	283.79	274.457	183.076	248.723	411.956	420.144	637.689	1404.13	781.793	2285.96	1256.45	1492.68	950.586	2082.48	1381.2	177.702	249.129	278.312	18.7788	12.818	13.315	11.6616	10.8247	6.83538	9.0333	13.6548
pgaptmp_001906	pgaptmp_001906	pgaptmp_001906	protein_coding	protein_coding	pgaptmp_001906	0.4589	231				TRUE	-1.82142	1.51359e-06	1.5964e-05	Chromosome_I	2048397	2048627	231	+	7.08447	329.955	396.933	375.742	213.323	202.771	342.237	357.122	217.919	242.093	46.4141	48.9813	48.1674	47.1332	41.0676	35.5713	91.0135	97.1999	97.9012	184.966	187.961	157.848	58.8574	71.0144	67.892	49.7496	45.3876	72.5184	73.6101	40.994
pgaptmp_004666	pgaptmp_004666	cueR	protein_coding	protein_coding	pgaptmp_004666	0.4264	387	GO:0045893	GO:0003677,GO:0003700,GO:0005507		TRUE	-1.67961	1.51954e-06	1.59946e-05	Chromosome_II	1581486	1581872	387	+	9.50551	791.738	970.769	1177.05	1345.28	1154.5	1600.68	2080.37	1539.61	1783.33	401.583	395.479	398.307	315.204	338.531	371.522	289.895	348.855	224.908	1332.2	1194.67	1017.71	84.3002	103.668	126.948	187.269	154.25	202.454	255.954	172.877
pgaptmp_000875	pgaptmp_000875	pgaptmp_000875	protein_coding	protein_coding	pgaptmp_000875	0.4745	333				TRUE	-2.87121	1.52564e-06	1.60268e-05	Chromosome_I	921197	921529	333	-	9.57773	1542.62	1886.97	1925.27	1941.04	1753.93	1093.51	1645.29	1671.71	1762.21	203.818	272.118	187.112	182.641	304.123	247.681	332.031	296.926	340.008	1380.82	2481.73	2034.58	190.885	234.187	241.317	314.019	272.341	160.735	235.25	218.149
pgaptmp_002563	pgaptmp_002563	mrdA	protein_coding	protein_coding	pgaptmp_002563	0.4694	1926	GO:0009252	GO:0003824,GO:0008658	GO:0016020	TRUE	1.46727	1.53257e-06	1.60675e-05	Chromosome_I	2765705	2767630	1926	+	10.9951	1830.17	1580.69	1725.15	1152.45	1364.78	1102.58	1162.69	1203.78	1237.91	4506.2	4691.32	4422.13	3719.11	4094.56	4330.47	1931.51	2150.38	2237.17	1460.17	1435.52	1763.75	39.1556	33.9181	37.3861	32.2353	36.6395	28.0212	28.7435	27.1599
pgaptmp_002864	pgaptmp_002864	pgaptmp_002864	protein_coding	protein_coding	pgaptmp_002864	0.4369	444				TRUE	1.56076	1.54884e-06	1.62059e-05	Chromosome_I	3113311	3113754	444	-	11.6298	3264.09	2745.96	2617.13	2238.29	2483.77	1326.89	1940.78	2238.15	2342.82	3170.28	3191.04	2997.49	5351.1	6284.46	6516.13	6836.13	5766.75	6990.67	2018.98	2032.53	2481.54	302.926	255.596	246.027	271.579	289.249	146.28	208.126	219.05
pgaptmp_004008	pgaptmp_004008	secD	protein_coding	protein_coding	pgaptmp_004008	0.4693	1839				TRUE	-1.75467	1.56414e-06	1.63334e-05	Chromosome_II	775843	777681	1839	+	11.9366	9035.99	7259.2	5918.76	8078.07	10677.9	4354.25	5972.33	12275.9	10438.2	2201.64	2458.13	2547.31	1609.89	1617.18	1749.58	1105.65	1322.19	1352.09	4827.56	5965.07	7163	202.466	163.136	134.335	236.641	300.225	115.895	154.63	290.073
pgaptmp_005075	pgaptmp_005075	pgaptmp_005075	protein_coding	protein_coding	pgaptmp_005075	0.4986	726		GO:0016787		TRUE	1.79456	1.56879e-06	1.63496e-05	Chromosome_II	2036900	2037625	726	+	9.09287	508.038	455.02	420.668	249.837	247.831	228.433	249.466	355.984	363.844	950.48	932.458	974.463	1204.84	1323.04	1341.17	687.658	845.506	1067.65	339.757	342.153	489.33	28.8349	25.9022	24.1849	18.5389	17.6507	15.4012	16.3609	21.3074
pgaptmp_002980	pgaptmp_002980	rpsE	protein_coding	protein_coding	pgaptmp_002980	0.4683	504	GO:0006412	GO:0003735	GO:0015935	TRUE	2.9619	1.58187e-06	1.64533e-05	Chromosome_I	3236910	3237413	504	-	16.4573	102389	66460.3	52146.5	28449.4	39970.4	19393.7	27573.4	65886.2	53286.6	271105	259383	320637	271100	278424	288625	171217	182215	190098	30142.2	29748.9	55011	8371.03	5449.71	4318.52	3040.94	4100.64	1883.49	2604.91	5680.69
pgaptmp_000398	pgaptmp_000398	pgaptmp_000398	protein_coding	protein_coding	pgaptmp_000398	0.5024	822				TRUE	1.49051	1.58742e-06	1.64785e-05	Chromosome_I	433510	434331	822	+	10.5272	1318.28	1079.9	1168.88	762.324	920.319	741.377	882.039	1132.88	1103.49	2054.33	2035.44	2067.49	2741.09	2845.88	2964.27	2391.63	2335.46	2688.31	943.272	1035.38	1246.17	66.0835	54.2944	59.3528	49.9611	57.8909	44.1469	51.0915	59.8893
pgaptmp_003779	pgaptmp_003779	pgaptmp_003779	protein_coding	protein_coding	pgaptmp_003779	0.4459	924	GO:0055085	GO:0022857	GO:0016020	TRUE	1.68469	1.60353e-06	1.66129e-05	Chromosome_II	534926	535849	924	+	7.2458	168.061	225.31	160.099	84.5603	86.0239	108.032	122.505	132.095	116.12	157.404	156.014	140.797	310.785	266.385	270.078	274.726	263.638	166.697	73.7629	88.5649	100.525	7.49469	10.0774	7.23198	4.93014	4.81383	5.72284	6.31272	6.21228
pgaptmp_004619	pgaptmp_004619	hsdR	protein_coding	protein_coding	pgaptmp_004619	0.4652	3549				TRUE	1.59128	1.63801e-06	1.69368e-05	Chromosome_II	1521412	1524960	3549	-	10.4597	1223.45	977.81	963.044	944.257	1063.69	790.033	1122.6	1504.54	1396.26	1872.71	2175.13	1711.79	2215.26	2361.94	2150.08	2553.43	2428.67	2614.23	681.19	746.111	935.46	14.205	11.3865	11.3261	14.3334	15.4972	10.8961	15.0609	18.4219
pgaptmp_000646	pgaptmp_000646	pgaptmp_000646	protein_coding	protein_coding	pgaptmp_000646	0.4927	891				TRUE	1.47613	1.6467e-06	1.69932e-05	Chromosome_I	662258	663148	891	-	6.06484	100.22	79.2105	73.5148	51.8893	44.3774	38.7594	45.2899	47.7631	46.4481	70.6301	30.8401	55.5777	139.927	155.391	152.825	79.2155	95.8684	71.4414	51.4105	52.8841	49.8469	4.63484	3.67406	3.4438	3.13736	2.5753	2.12928	2.42023	2.32944
pgaptmp_000813	pgaptmp_000813	pgaptmp_000813	protein_coding	protein_coding	pgaptmp_000813	0.466	294				TRUE	-1.63114	1.66192e-06	1.71168e-05	Chromosome_I	858724	859017	294	-	9.15893	682.267	892.439	743.316	832.151	591.926	785.085	1060.23	756	886.033	373.331	342.869	333.466	268.07	356.29	353.078	293.266	298.257	374.406	1161.21	1044.3	1070.88	95.6236	125.451	105.528	152.482	104.103	130.708	171.706	111.741
pgaptmp_003154	pgaptmp_003154	pgaptmp_003154	protein_coding	protein_coding	pgaptmp_003154	0.4308	441				TRUE	1.3779	1.67146e-06	1.71814e-05	Chromosome_I	3419007	3419447	441	+	8.01585	262.114	174.263	240.965	172.324	213.012	123.7	104.686	106.721	117.528	326.917	366.453	402.012	462.495	499.471	490.093	613.499	517.956	529.196	175.466	199.43	203.541	24.4912	16.3308	22.8064	21.0509	24.9752	13.7298	11.3028	10.5159
pgaptmp_000958	pgaptmp_000958	pgaptmp_000958	protein_coding	protein_coding	pgaptmp_000958	0.4598	1107	GO:0000160			TRUE	-1.50656	1.67565e-06	1.71909e-05	Chromosome_I	1011889	1012995	1107	+	10.8226	3069.81	3887.48	4218.11	3140.9	3176.74	3066.94	4669.31	4359.87	4228.89	633.653	781.886	679.901	854.29	742.547	819.456	862.943	878.794	1005.47	2404	2704.73	2232.31	114.267	145.132	159.042	152.852	148.381	135.61	200.834	171.145
pgaptmp_000924	pgaptmp_000924	ccmE	protein_coding	protein_coding	pgaptmp_000924	0.465	486	GO:0017004	GO:0020037	GO:0005886	TRUE	1.85516	1.68569e-06	1.72603e-05	Chromosome_I	969703	970188	486	+	10.6489	1433.92	1234.8	1391.88	848.806	1015.22	812.299	989.696	1241.09	1212.58	2405.46	2160.62	2567.69	3786.86	3131.13	3541.32	2118.59	2481.93	2656.56	796.863	1087.63	1176.39	121.575	105.003	119.538	94.0885	108.011	81.8111	96.9612	110.97
pgaptmp_000418	pgaptmp_000418	mlaF	protein_coding	protein_coding	pgaptmp_000418	0.4789	804		GO:0005524		TRUE	1.57753	1.69434e-06	1.73151e-05	Chromosome_I	455345	456148	804	+	11.547	2401.42	2429.12	2621.21	1611.13	1902.08	2168.88	1999.44	2021.72	2107.06	4298.35	4655.04	4575.9	5686.92	4455.28	4750.74	5405.19	5995.77	5815.86	1611.61	1827.37	1855.13	123.075	124.863	136.078	107.954	122.326	132.042	118.409	109.27
pgaptmp_005191	pgaptmp_005191	pgaptmp_005191	protein_coding	protein_coding	pgaptmp_005191	0.4651	501				TRUE	2.2847	1.70726e-06	1.74134e-05	Chromosome_II	2161619	2162119	501	+	7.17416	68.6121	70.4093	82.4999	99.2943	81.2448	98.1356	83.8977	92.5409	113.305	151.35	292.074	263.068	608.313	398.467	528.299	136.52	237.008	130.976	127.968	96.8479	87.2321	5.64315	5.8081	6.87316	10.677	8.38497	9.58786	7.97343	8.02664
pgaptmp_000264	pgaptmp_000264	pgaptmp_000264	protein_coding	protein_coding	pgaptmp_000264	0.4614	687	GO:0005975	GO:0008967		TRUE	1.38178	1.71312e-06	1.7437e-05	Chromosome_I	276703	277389	687	+	10.6865	1103.19	1084.3	1166.43	998.709	1009.07	959.914	824.87	904.513	875.477	2685.96	2354.73	2991.93	2951.72	2862.53	3234.35	3439.97	3592.4	3445.06	1181.32	1129.68	1369.13	66.1686	65.2283	70.8671	78.3153	75.9469	68.3925	57.1691	57.2131
pgaptmp_002409	pgaptmp_002409	pgaptmp_002409	protein_coding	protein_coding	pgaptmp_002409	0.4659	558				TRUE	1.60159	1.71621e-06	1.7437e-05	Chromosome_I	2620406	2620963	558	-	9.21236	549.668	486.705	423.935	324.789	370.722	310.075	322.969	344.79	399.032	1124.03	1220.9	1311.63	1324.15	1253.12	1342.49	603.386	572.548	705.153	374.962	456.205	527.546	40.5905	36.0473	31.7107	31.3567	34.3525	27.1998	27.5587	26.8508
pgaptmp_002467	pgaptmp_002467	pgaptmp_002467	protein_coding	protein_coding	pgaptmp_002467	0.4468	855				TRUE	1.60872	1.72601e-06	1.75029e-05	Chromosome_I	2683104	2683958	855	+	10.6079	1218.06	1426.67	1401.68	1231.89	1105.34	1144.64	1116.66	982.874	1006.38	2357.03	1776.03	2100.84	3202.11	4380.92	3943.14	1296.1	1190.37	1517.47	1390.88	1299.16	1309.31	58.703	68.9603	68.4265	77.6194	66.8457	65.5293	62.185	49.9539
pgaptmp_000909	pgaptmp_000909	flhF	protein_coding	protein_coding	pgaptmp_000909	0.4868	1512	GO:0044781	GO:0003924,GO:0005525		TRUE	2.12643	1.75527e-06	1.77268e-05	Chromosome_I	956415	957926	1512	+	11.2391	2867.06	1934.5	1926.9	1054.44	1433.05	855.181	1113.69	1677.68	1563.75	5472.83	6022.88	6006.1	5361.41	5673.99	5724.34	2703.44	3431.29	3707.02	1185.8	1075.52	1816.09	78.1346	52.8759	53.1924	37.5695	49.0064	27.6847	35.0706	48.2163
pgaptmp_000149	pgaptmp_000149	rpoB	protein_coding	protein_coding	pgaptmp_000149	0.4641	4029	GO:0006351	GO:0003677,GO:0003899		TRUE	2.69498	1.759e-06	1.77268e-05	Chromosome_I	149846	153874	4029	+	16.1179	78552.4	47445.3	43647.4	21607.7	30072.2	17091.3	22311.6	48501.9	42372	196309	209776	242791	192744	207478	202290	147701	149596	161001	25584.6	27698.5	46057.7	803.379	486.674	452.17	288.919	385.933	207.639	263.673	523.117
pgaptmp_002406	pgaptmp_002406	rnd	protein_coding	protein_coding	pgaptmp_002406	0.4835	1119	GO:0006396	GO:0008408,GO:0033890		TRUE	1.29356	1.75959e-06	1.77268e-05	Chromosome_I	2616541	2617659	1119	-	10.5834	1374.56	1245.37	1030.84	1071.1	1198.19	959.09	733.548	895.557	927.555	2574.97	2398.27	2754.8	2819.16	2723.78	2737.67	1971.96	2284.86	2192.19	1120.97	1159.63	1300.17	50.6163	45.9948	38.4505	51.566	55.3655	41.9529	31.2127	34.7777
pgaptmp_004036	pgaptmp_004036	pgaptmp_004036	protein_coding	protein_coding	pgaptmp_004036	0.4554	2400	GO:0009297	GO:0015473	GO:0016020	TRUE	-1.52639	1.76746e-06	1.77268e-05	Chromosome_II	805394	807793	2400	+	7.93948	279.845	293.959	314.48	343.366	312.007	351.309	502.644	413.449	410.996	157.404	166.899	146.355	128.143	113.214	137.015	158.431	131.819	164.051	439.784	373.374	393.79	4.80468	5.06194	5.46918	7.70745	6.72198	7.16491	9.97199	7.48597
pgaptmp_003946	pgaptmp_003946	pgaptmp_003946	protein_coding	protein_coding	pgaptmp_003946	0.4283	1653	GO:0009244,GO:1900727	GO:0008484,GO:0016776	GO:0005886	TRUE	-1.43335	1.76824e-06	1.77268e-05	Chromosome_II	714500	716152	1653	-	9.1181	476.43	565.915	606.905	813.573	753.733	842.811	905.055	680.624	793.137	452.033	448.088	418.686	309.312	336.311	284.57	412.932	360.838	366.468	946.624	902.852	868.167	11.8764	14.1488	15.3246	26.5148	23.577	24.9569	26.0696	17.8925
pgaptmp_000816	pgaptmp_000816	pgaptmp_000816	protein_coding	protein_coding	pgaptmp_000816	0.4653	1038				TRUE	1.8139	1.77136e-06	1.77268e-05	Chromosome_I	860682	861719	1038	-	10.0824	1030.72	908.281	819.281	748.231	890.279	508.821	565.752	643.309	736.836	1858.58	1494.84	1611.75	2333.1	2902.48	2897.08	1085.42	1110.48	1385.17	656.602	834.676	953.737	40.9169	36.163	32.944	38.8331	44.3479	23.9939	25.9515	26.9314
pgaptmp_000775	pgaptmp_000775	pgaptmp_000775	protein_coding	protein_coding	pgaptmp_000775	0.4701	1338				TRUE	3.24417	1.77249e-06	1.77268e-05	Chromosome_I	820808	822145	1338	+	10.0086	400.88	409.254	469.678	388.849	290.843	476.658	399.442	382.104	339.212	1985.72	4323.05	3171.64	5228.84	2234.3	3511.01	3633.8	6850.6	4707.2	430.843	425.621	349.759	12.3457	12.6409	14.6516	15.6563	11.2395	17.4375	14.2145	12.4098
pgaptmp_001619	pgaptmp_001619	pgaptmp_001619	protein_coding	protein_coding	pgaptmp_001619	0.4169	981		GO:0003677,GO:0003700		TRUE	-1.32714	1.77504e-06	1.77268e-05	Chromosome_I	1696141	1697121	981	+	8.93143	951.319	1023.58	1050.44	671.998	525.702	532.736	505.613	426.136	553.859	318.845	293.888	259.363	251.868	276.374	283.253	417.988	435.402	346.623	751.6	724.448	729.426	39.9591	43.1214	44.6936	36.9032	27.7086	26.5813	24.5404	18.8763
pgaptmp_003567	pgaptmp_003567	pgaptmp_003567	protein_coding	protein_coding	pgaptmp_003567	0.4312	552		GO:0008080,GO:0016746		TRUE	-1.60027	1.78185e-06	1.77611e-05	Chromosome_II	319290	319841	552	-	8.44762	471.805	526.31	535.024	741.184	667.709	602.008	952.573	862.72	928.963	131.17	107.033	116.713	150.237	189.799	209.475	168.544	130.488	158.759	592.898	612.945	621.425	35.2194	39.4043	40.4553	72.3355	62.545	53.3821	82.1659	67.9154
pgaptmp_003500	pgaptmp_003500	pgaptmp_003500	protein_coding	protein_coding	pgaptmp_003500	0.4198	717				TRUE	-1.51044	1.7868e-06	1.77633e-05	Chromosome_II	250770	251486	717	+	8.5126	477.201	488.465	459.059	583.594	526.384	531.911	749.139	523.155	634.087	199.782	190.483	174.144	150.237	165.381	187.078	338.773	284.942	329.424	483.371	507.177	584.039	27.4246	28.155	26.7233	43.8486	37.9601	36.3122	49.7481	31.7065
pgaptmp_004672	pgaptmp_004672	pgaptmp_004672	protein_coding	protein_coding	pgaptmp_004672	0.4317	681	GO:0006355	GO:0003700,GO:0030552		TRUE	-1.85568	1.78882e-06	1.77633e-05	Chromosome_II	1586070	1586750	681	-	9.16671	617.509	758.661	909.95	708.513	712.769	960.739	1266.63	943.32	1055.64	322.881	230.393	326.056	222.41	260.835	279.3	492.147	460.701	377.052	1088	1095.91	814.166	37.3641	46.0407	55.7713	56.0486	54.1185	69.0544	88.5597	60.1935
pgaptmp_000591	pgaptmp_000591	oadA	protein_coding	protein_coding	pgaptmp_000591	0.4822	1794	GO:0006814	GO:0008948,GO:0015081		TRUE	1.36033	1.79821e-06	1.78229e-05	Chromosome_I	594118	595911	1794	+	9.62717	1017.62	964.608	1016.14	719.403	678.633	686.949	742.457	855.257	807.916	647.779	751.046	737.331	1179.8	1073.31	1136.96	876.426	1011.94	908.893	443.695	495.708	447.791	23.3733	22.2213	23.6413	21.603	19.5594	18.7428	19.7052	20.7163
pgaptmp_000914	pgaptmp_000914	pgaptmp_000914	protein_coding	protein_coding	pgaptmp_000914	0.4815	2241	GO:0006935,GO:0007165	GO:0000155,GO:0005524		TRUE	1.88546	1.81697e-06	1.79649e-05	Chromosome_I	960839	963079	2241	+	13.0609	10007.3	7844.48	7020.66	3996.12	5114.33	3615.35	4912.84	7357	6405.62	12287.6	14465.8	15120.8	16671.9	14322.6	15386.5	15335.8	15670.5	19354	3808.85	4013.45	5547.13	184.007	144.665	130.761	96.064	118.002	78.9661	104.381	142.658
pgaptmp_003246	pgaptmp_003246	pgaptmp_003246	protein_coding	protein_coding	pgaptmp_003246	0.5083	423	GO:0015986	GO:0046933		TRUE	2.27549	1.81936e-06	1.79649e-05	Chromosome_I	3515755	3516177	423	-	14.1769	16486.2	12970.3	10610.6	6296.54	8556.65	7436.04	8115.06	14842.4	11681	42587.9	53687.1	55010.8	41829.3	29487.7	33440.9	60294.8	46718.5	51375.6	6758.81	6658.93	9649.53	1605.97	1267.22	1046.99	801.911	1045.94	860.466	913.448	1524.76
pgaptmp_003361	pgaptmp_003361	gltS	protein_coding	protein_coding	pgaptmp_003361	0.4717	1236	GO:0015813	GO:0015501	GO:0016020	TRUE	1.40861	1.83715e-06	1.81003e-05	Chromosome_II	96836	98071	1236	-	12.3498	2692.83	2366.63	2711.88	2898.75	2620.32	3948.51	3303.94	3780.74	3489.94	11139.4	8700.53	11487.9	9793.4	8416.65	9458	11162.6	10327.2	10331.2	3621.09	3790.45	3653.78	89.7737	79.1324	91.5783	126.345	109.617	156.368	127.276	132.922
pgaptmp_000999	pgaptmp_000999	pgaptmp_000999	protein_coding	protein_coding	pgaptmp_000999	0.4406	690				TRUE	-1.36487	1.84113e-06	1.81003e-05	Chromosome_I	1058182	1058871	690	-	9.56463	1115.53	1263.85	1529.92	1183.2	1027.51	1267.52	1530.2	1285.12	1341.37	351.133	379.151	377.929	424.199	418.446	459.791	385.965	348.855	336.039	1242.24	1243.73	1119.06	66.6175	75.6985	92.5469	92.3793	76.9981	89.916	105.593	80.9345
pgaptmp_001230	pgaptmp_001230	pgaptmp_001230	protein_coding	protein_coding	pgaptmp_001230	0.4699	549				TRUE	-1.94364	1.84339e-06	1.81003e-05	Chromosome_I	1313441	1313989	549	+	8.48241	756.275	1066.7	1042.28	632.921	613.091	649.014	1016.42	837.346	871.958	106.954	152.386	140.797	142.873	137.632	150.19	104.497	141.14	112.454	700.748	656.909	473.545	56.7631	80.2994	79.2413	62.1071	57.7426	57.8648	88.1526	66.2781
pgaptmp_002985	pgaptmp_002985	rplE	protein_coding	protein_coding	pgaptmp_002985	0.4667	540	GO:0006412	GO:0003735	GO:0005840	TRUE	2.57653	1.85851e-06	1.81874e-05	Chromosome_I	3239082	3239621	540	-	16.8485	121582	89750.8	73857	38369.2	57616.2	33162.4	41980.8	88681.1	71896.1	328916	347074	421405	339789	273019	287142	227606	220034	221748	45270.3	44550	71252.8	9277.58	6868.88	5708.72	3827.84	5516.9	3005.97	3701.6	7136.33
pgaptmp_002499	pgaptmp_002499	pgaptmp_002499	protein_coding	protein_coding	pgaptmp_002499	0.4773	639				TRUE	-1.34869	1.86052e-06	1.81874e-05	Chromosome_I	2716486	2717124	639	-	9.97746	1366.85	1422.27	1509.5	1266.48	1144.94	1157.83	1491.6	1375.43	1390.63	962.588	925.202	920.738	393.268	440.645	457.156	911.821	1019.93	833.483	1107	1212.51	1219.59	88.1408	91.9862	98.5994	106.773	92.6456	88.6908	111.143	93.535
pgaptmp_000794	pgaptmp_000794	pgaptmp_000794	protein_coding	protein_coding	pgaptmp_000794	0.4521	480	GO:0032784	GO:0003677		TRUE	-1.47092	1.86262e-06	1.81874e-05	Chromosome_I	840044	840523	480	+	8.80153	555.835	871.316	739.232	713.638	612.408	664.683	798.142	753.015	756.541	262.34	223.137	259.363	272.489	248.626	218.697	203.938	210.378	220.939	759.982	731.457	736.903	47.7159	75.0198	64.2807	80.0942	65.9696	67.7807	79.172	68.171
pgaptmp_001813	pgaptmp_001813	tssM	protein_coding	protein_coding	pgaptmp_001813	0.456	3390	GO:0033103	GO:0003674		TRUE	-1.53737	1.87168e-06	1.82263e-05	Chromosome_I	1938538	1941927	3390	+	7.78017	384.69	482.304	565.247	383.084	355.019	327.393	487.052	420.912	393.402	102.918	81.6355	118.566	91.3206	93.2347	98.809	119.666	106.52	116.423	329.139	321.127	273.327	4.67595	5.8798	6.95952	6.08777	5.41497	4.72719	6.84082	5.39547
pgaptmp_002386	pgaptmp_002386	pgaptmp_002386	protein_coding	protein_coding	pgaptmp_002386	0.4743	447				TRUE	1.36278	1.87602e-06	1.82263e-05	Chromosome_I	2598211	2598657	447	+	9.53262	743.94	630.164	650.197	349.772	464.256	445.321	440.277	495.542	494.039	1065.51	1139.27	1291.26	1246.08	1134.35	1234.45	1348.35	1199.69	1414.28	465.489	465.125	549.977	68.5786	58.2623	60.7126	42.1543	53.7024	48.7639	46.8977	48.1737
pgaptmp_004031	pgaptmp_004031	arfB	protein_coding	protein_coding	pgaptmp_004031	0.4469	414	GO:0006415	GO:0003747		TRUE	-1.82637	1.877e-06	1.82263e-05	Chromosome_II	802014	802427	414	-	8.67157	442.51	578.237	553.811	824.463	761.926	827.967	910.253	797.046	782.581	280.502	197.739	285.299	164.966	256.395	212.11	77.53	142.471	169.343	833.745	789.438	839.92	44.0434	57.7227	55.8345	107.284	95.1604	97.8916	104.687	83.6605
pgaptmp_002650	pgaptmp_002650	pgaptmp_002650	protein_coding	protein_coding	pgaptmp_002650	0.4861	144				TRUE	-1.94129	1.90974e-06	1.85101e-05	Chromosome_I	2868275	2868418	144	-	7.27553	330.726	427.737	389.628	297.883	237.59	255.647	406.124	282.847	274.466	64.5761	43.5389	44.4622	55.9707	68.8161	69.8251	79.2155	69.2383	59.5345	326.345	309.658	233.45	94.6376	122.76	112.935	111.442	85.3118	86.8983	134.285	85.3545
pgaptmp_003733	pgaptmp_003733	pgaptmp_003733	protein_coding	protein_coding	pgaptmp_003733	0.4682	534				TRUE	-2.14988	1.9147e-06	1.8524e-05	Chromosome_II	491602	492135	534	+	8.84605	341.519	376.69	464.777	742.465	688.191	891.467	772.898	956.754	789.618	236.106	361.01	279.741	220.937	154.281	139.65	451.697	415.43	400.866	725.894	937.896	854.874	26.3531	29.1531	36.3282	74.903	66.6364	81.714	68.915	77.8568
pgaptmp_005153	pgaptmp_005153	creC	protein_coding	protein_coding	pgaptmp_005153	0.4754	1443	GO:0007165,GO:0016310	GO:0000155	GO:0016020	TRUE	1.48104	1.9373e-06	1.87083e-05	Chromosome_II	2120460	2121902	1443	-	9.03262	369.272	386.371	338.985	411.271	524.336	329.043	455.126	511.214	506.707	649.797	653.084	596.534	1032.51	1170.98	1233.14	391.021	527.276	485.537	376.638	447.284	469.392	10.5448	11.0657	9.80516	15.3541	18.7883	11.1614	15.0175	15.3948
pgaptmp_003994	pgaptmp_003994	pgaptmp_003994	protein_coding	protein_coding	pgaptmp_003994	0.4127	315				TRUE	-1.62339	1.94894e-06	1.87788e-05	Chromosome_II	764286	764600	315	-	13.4097	8064.62	11414.2	11279.6	16119	12319.2	21109	26060.3	12586.3	17157.7	9262.64	8660.62	8825.74	5538.16	4527.43	5040.58	10973.9	7911.81	6931.14	18231.2	15651.1	15651.9	1054.95	1497.54	1494.6	2756.71	2022.16	3280.13	3939.13	1736.3
pgaptmp_002617	pgaptmp_002617	pgaptmp_002617	protein_coding	protein_coding	pgaptmp_002617	0.479	1071				TRUE	1.35962	1.95174e-06	1.87788e-05	Chromosome_I	2826883	2827953	1071	+	8.95658	494.932	488.465	470.495	402.943	400.762	391.718	418.746	397.777	404.662	476.249	493.441	453.885	950.029	808.034	887.964	562.935	640.454	673.401	370.491	346.614	363.051	19.0421	18.8489	18.3361	20.2683	19.3482	17.9026	18.6163	16.1394
pgaptmp_004789	pgaptmp_004789	pgaptmp_004789	protein_coding	protein_coding	pgaptmp_004789	0.4553	615		GO:0015035		TRUE	-1.58221	1.96195e-06	1.88292e-05	Chromosome_II	1714425	1715039	615	+	10.2488	892.729	1043.82	1119.88	1986.53	2115.78	2293.4	1837.58	1536.63	1712.25	845.543	912.503	917.033	767.388	766.966	847.123	547.767	637.791	625.774	2665.52	2795.85	2159.2	59.814	70.1442	76.0038	174.014	177.885	182.532	142.267	108.575
pgaptmp_000815	pgaptmp_000815	pgaptmp_000815	protein_coding	protein_coding	pgaptmp_000815	0.45	300				TRUE	1.44276	1.96413e-06	1.88292e-05	Chromosome_I	860369	860668	300	-	9.26824	550.439	503.427	538.292	600.891	466.987	450.269	386.078	370.91	404.662	825.363	687.552	735.479	982.433	1125.48	1147.5	1043.28	826.865	1033.25	387.814	459.39	408.744	75.6042	69.3516	74.8923	107.904	80.4873	73.4655	61.2754	53.726
pgaptmp_004352	pgaptmp_004352	pgaptmp_004352	protein_coding	protein_coding	pgaptmp_004352	0.4141	990		GO:0005524,GO:0008716,GO:0046872		TRUE	-1.66133	1.99456e-06	1.90822e-05	Chromosome_II	1218183	1219172	990	+	11.7872	3961.77	4418.19	4214.85	6450.93	5437.94	4602.48	6261.88	5913.66	5985.47	2425.64	2400.08	2804.82	1570.13	2088.9	1765.39	2005.67	1561.86	1845.57	6776.13	5722.31	5800.52	164.897	184.438	177.7	351.036	284.016	227.556	301.164	259.573
pgaptmp_001450	pgaptmp_001450	pgaptmp_001450	protein_coding	protein_coding	pgaptmp_001450	0.4583	384				TRUE	-1.66123	1.99778e-06	1.90822e-05	Chromosome_I	1503641	1504024	384	-	7.00439	222.026	234.111	203.391	265.853	319.517	235.855	274.709	330.61	314.58	50.4501	59.866	48.1674	82.4832	67.7061	59.2854	21.9107	37.2822	38.3667	243.641	250.403	267.512	23.8249	25.196	22.1076	37.297	43.0236	30.064	34.0624	37.413
pgaptmp_002273	pgaptmp_002273	pgaptmp_002273	protein_coding	protein_coding	pgaptmp_002273	0.4756	1272				TRUE	1.68409	2.01211e-06	1.91843e-05	Chromosome_I	2467139	2468410	1272	+	6.77977	122.577	124.096	103.738	58.2954	79.8793	38.7594	51.972	88.8094	70.376	131.17	179.598	175.996	225.356	174.26	204.205	193.825	211.709	209.032	53.087	59.8928	68.9549	3.97081	4.03194	3.404	2.46894	3.24707	1.4915	1.94543	3.03396
pgaptmp_004238	pgaptmp_004238	cyoE	protein_coding	protein_coding	pgaptmp_004238	0.4765	873	GO:0048034	GO:0008495	GO:0016020	TRUE	1.82844	2.01732e-06	1.91897e-05	Chromosome_II	1089231	1090103	873	+	11.9504	1928.85	1827.12	2437.42	2017.92	2627.83	2424.53	3453.17	3879.26	3451.94	9141.56	9099.63	8623.81	8005.29	5961.47	5682.18	6928.83	7384.53	9223.88	1774.22	1957.35	2145.08	91.0421	86.4958	116.535	124.524	155.642	135.939	188.337	193.095
pgaptmp_000495	pgaptmp_000495	pgaptmp_000495	protein_coding	protein_coding	pgaptmp_000495	0.5065	768				TRUE	2.48273	2.01997e-06	1.91897e-05	Chromosome_I	514210	514977	768	+	7.16385	380.065	273.716	313.663	41.6396	36.1847	49.4801	57.9117	77.615	49.9669	292.611	377.337	351.992	413.889	217.548	270.078	237.646	320.893	321.486	51.9693	45.8753	51.5085	20.3918	14.7293	17.0468	2.92085	2.43617	3.15357	3.59036	4.39159
pgaptmp_000198	pgaptmp_000198	aspA	protein_coding	protein_coding	pgaptmp_000198	0.4573	1452	GO:0006520	GO:0008797		TRUE	-2.99579	2.02676e-06	1.92195e-05	Chromosome_I	216178	217629	1452	-	13.9113	80166.7	61742.8	46961.2	31427.6	33181.3	10395.8	28874.9	53592.4	50826.2	4457.77	5260.95	4405.46	3982.76	3696.09	3352.92	5922.62	5472.49	10114.3	19250.5	31571.1	43373.4	2275.02	1757.36	1349.94	1166.03	1181.6	350.447	946.862	1603.89
pgaptmp_003841	pgaptmp_003841	pgaptmp_003841	protein_coding	protein_coding	pgaptmp_003841	0.4281	1488				TRUE	1.77763	2.03376e-06	1.92513e-05	Chromosome_II	607841	609328	1488	-	8.99785	317.62	409.254	369.208	518.893	450.601	448.62	343.015	256.726	307.543	645.761	520.653	605.797	677.54	910.148	959.106	1390.48	1236.97	1534.67	285.552	244.031	240.096	8.79556	11.3666	10.3564	18.7862	15.6579	14.7573	10.976	7.4973
pgaptmp_004743	pgaptmp_004743	pgaptmp_004743	protein_coding	protein_coding	pgaptmp_004743	0.4262	1518		GO:0005524,GO:0016887		TRUE	-1.4126	2.05565e-06	1.94235e-05	Chromosome_II	1660506	1662023	1518	-	9.64886	1576.54	1606.21	1441.71	1500.95	1561.4	1180.1	2099.67	2155.31	2205.58	403.601	384.594	301.972	319.622	334.091	276.665	534.283	459.37	392.928	870.067	915.595	894.752	42.7948	43.7294	39.6411	53.2669	53.1847	38.0522	65.8585	61.6986
pgaptmp_000570	pgaptmp_000570	pgaptmp_000570	protein_coding	protein_coding	pgaptmp_000570	0.4482	627	GO:0036211	GO:0004719		TRUE	1.91132	2.09628e-06	1.97449e-05	Chromosome_I	579541	580167	627	+	10.039	1286.67	975.169	927.92	557.97	625.38	354.608	572.435	760.478	720.65	1477.18	1411.39	1509.86	2502.48	2717.12	2753.48	1223.63	1454	1528.05	562.722	751.208	927.152	84.5586	64.2768	61.7709	47.9411	51.5728	27.683	43.4701	52.7055
pgaptmp_002791	pgaptmp_002791	yaaA	protein_coding	protein_coding	pgaptmp_002791	0.4479	777				TRUE	-1.51959	2.09716e-06	1.97449e-05	Chromosome_I	3023623	3024399	777	-	12.022	5902.96	8186.85	8558.75	5664.9	4723.8	7050.09	9269.58	7280.88	7381.73	2062.4	2042.7	2473.21	2050.3	2121.09	2240.99	2105.11	2150.38	2025.5	7232.12	6643	5695.01	313.045	435.449	459.759	392.768	314.351	444.126	568.031	407.193
pgaptmp_003155	pgaptmp_003155	pgaptmp_003155	protein_coding	protein_coding	pgaptmp_003155	0.4908	1194		GO:0050660,GO:0050661		TRUE	1.58176	2.10135e-06	1.9749e-05	Chromosome_I	3419499	3420692	1194	-	10.4039	1430.06	1048.22	1095.37	746.95	980.399	718.286	595.451	770.926	799.471	2098.72	2282.16	2325	3078.39	2678.28	2948.46	1624.76	1994.6	1971.25	888.508	969.116	1224.57	49.3524	36.2818	38.2911	33.7017	42.4563	29.446	23.7451	28.0573
pgaptmp_002034	pgaptmp_002034	hisA	protein_coding	protein_coding	pgaptmp_002034	0.477	738	GO:0000105	GO:0003949		TRUE	2.26273	2.12173e-06	1.99049e-05	Chromosome_I	2199348	2200085	738	-	7.98038	335.351	172.503	187.871	106.982	137.229	97.3109	96.5194	184.336	201.275	443.961	451.716	403.865	531.722	687.051	631.06	503.945	503.309	473.63	105.056	108.317	178.618	18.7241	9.6601	10.6254	7.80939	9.61462	6.45413	6.22718	10.854
pgaptmp_002428	pgaptmp_002428	sucA	protein_coding	protein_coding	pgaptmp_002428	0.4756	2826	GO:0006099	GO:0004591,GO:0030976	GO:0045252	TRUE	2.22759	2.12985e-06	1.99456e-05	Chromosome_I	2642173	2644998	2826	-	12.2143	6283.79	4399.7	4036.78	2420.86	3136.46	1787.06	2503.57	4472.56	3816.49	6054.01	7289.14	6461.84	10584.4	10481.1	10360.5	7011.41	7194.13	12368.6	1763.05	2184.18	3196.02	91.6237	64.3418	59.6216	46.1489	57.3867	30.9527	42.1813	68.7736
pgaptmp_002605	pgaptmp_002605	ribBA	protein_coding	protein_coding	pgaptmp_002605	0.491	1110		GO:0003935,GO:0008686		TRUE	1.97255	2.14408e-06	2.00092e-05	Chromosome_I	2813301	2814410	1110	-	11.8764	3308.03	2701.96	2530.54	1919.9	2282.36	1394.51	2257.81	3330.73	2952.27	4276.15	4252.3	4494.39	7896.29	8250.16	8484.4	9770.47	8729.35	9764.98	1726.16	2083.5	2865.37	122.802	100.6	95.155	93.1796	106.318	61.494	96.8496	130.393
pgaptmp_004073	pgaptmp_004073	pgaptmp_004073	protein_coding	protein_coding	pgaptmp_004073	0.4528	879	GO:0006355	GO:0003677,GO:0003700		TRUE	-1.5661	2.14425e-06	2.00092e-05	Chromosome_II	861937	862815	879	-	9.565	963.653	1151.19	1185.22	1275.45	1230.28	1259.27	1609.65	1364.23	1436.37	419.745	368.267	405.717	344.662	386.258	412.363	448.326	380.811	332.07	1386.41	1165.36	1095.8	45.1742	54.1254	56.2797	78.1699	72.37	70.1233	87.1916	67.443
pgaptmp_004796	pgaptmp_004796	pgaptmp_004796	protein_coding	protein_coding	pgaptmp_004796	0.4317	630				TRUE	-1.40397	2.16325e-06	2.01508e-05	Chromosome_II	1721557	1722186	630	-	9.12042	548.126	663.608	730.247	941.695	869.797	1014.34	1164.17	1014.97	959.928	312.791	339.241	320.498	312.258	315.222	345.173	281.468	271.627	248.722	952.771	981.859	842.412	35.8507	43.5324	48.3805	80.5256	71.3874	78.8092	87.9852	70.0081
pgaptmp_002037	pgaptmp_002037	hisC	protein_coding	protein_coding	pgaptmp_002037	0.4621	1041	GO:0000105	GO:0004400		TRUE	1.9329	2.16791e-06	2.01585e-05	Chromosome_I	2201884	2202924	1041	-	9.26223	649.117	584.398	476.212	315.82	469.035	293.582	355.637	600.023	499.669	895.994	975.997	863.307	1132.67	970.084	1106.66	1304.53	1215.66	1193.34	217.936	308.384	350.59	25.6939	23.2006	19.0937	16.3438	23.2969	13.8042	16.2663	25.047
pgaptmp_002987	pgaptmp_002987	rplN	protein_coding	protein_coding	pgaptmp_002987	0.4812	372	GO:0006412	GO:0003735	GO:0015934	TRUE	2.48891	2.188e-06	2.03094e-05	Chromosome_I	3239976	3240347	372	-	16.6255	89134.1	69311	56433.2	32173.3	48028	36465.2	35038	68759.4	55107.9	256266	342934	369831	276031	207110	222772	258246	230489	233124	39122.3	36948.1	58160.5	9873.23	7700.18	6331.88	4659.26	6675.67	4798.09	4484.66	8032.05
pgaptmp_002624	pgaptmp_002624	pgaptmp_002624	protein_coding	protein_coding	pgaptmp_002624	0.4731	1560				TRUE	1.35304	2.20676e-06	2.04475e-05	Chromosome_I	2838756	2840315	1560	-	12.4257	3251.75	3260.83	3233.83	3691.19	4479.39	4592.58	3283.89	3028.48	2827	6552.46	6623.36	6852.73	10678.6	9820.72	11212.8	10471.6	10700	14544.9	4205.61	4358.79	4625.79	85.8917	86.3864	86.5235	127.469	148.47	144.1	100.23	84.3601
pgaptmp_002186	pgaptmp_002186	pgaptmp_002186	protein_coding	protein_coding	pgaptmp_002186	0.4161	447				TRUE	-2.70816	2.23599e-06	2.06819e-05	Chromosome_I	2367340	2367786	447	+	10.7599	1715.3	2302.39	2783.76	2597.03	2212.04	3803.37	2583.01	1967.24	2012.05	1291.52	1449.48	1457.99	458.076	554.968	621.838	1427.56	1115.8	1225.09	5261.76	3480.79	2726.62	158.122	212.869	259.935	312.992	255.876	416.48	275.138	191.244
pgaptmp_005241	pgaptmp_005241	iolC	protein_coding	protein_coding	pgaptmp_005241	0.5187	987	GO:0019310	GO:0047590		TRUE	2.11932	2.24384e-06	2.07181e-05	Chromosome_II	2218826	2219812	987	-	3.92177	8.48015	2.64035	5.71782	7.6873	6.14456	9.89602	4.45474	10.4482	6.33384	18.162	41.7248	22.2311	70.6999	43.2875	43.476	48.8776	50.5972	37.0437	6.14691	5.73442	5.81547	0.354034	0.110557	0.241799	0.419586	0.321898	0.490768	0.214901	0.460003
pgaptmp_000343	pgaptmp_000343	pgaptmp_000343	protein_coding	protein_coding	pgaptmp_000343	0.441	780	GO:0019379	GO:0003824,GO:0004604		TRUE	1.41697	2.26388e-06	2.08665e-05	Chromosome_I	361694	362473	780	+	9.21426	491.849	516.629	592.202	431.13	395.3	456.866	581.344	438.077	518.671	791.057	520.653	642.849	1142.98	1156.55	1082.95	615.184	866.81	635.035	460.46	472.771	395.452	25.9834	27.3732	31.6896	29.7768	26.2045	28.67	35.4872	24.4058
pgaptmp_005308	pgaptmp_005308	pgaptmp_005308	protein_coding	protein_coding	pgaptmp_005308	0.4971	1191			GO:0019867	TRUE	1.39348	2.26819e-06	2.08697e-05	Chromosome_II	2294695	2295885	1191	+	7.13759	80.9469	91.5322	93.9355	104.419	139.96	118.752	141.067	173.141	159.753	161.44	159.643	111.155	271.016	237.526	259.538	205.623	147.797	174.635	97.233	91.1135	106.34	2.80057	3.17617	3.29199	4.72316	6.07624	4.88048	5.63957	6.31722
pgaptmp_000895	pgaptmp_000895	fliH	protein_coding	protein_coding	pgaptmp_000895	0.4794	801	GO:0071973	GO:0003774	GO:0009288	TRUE	2.3041	2.28255e-06	2.09652e-05	Chromosome_I	943163	943963	801	+	9.59263	706.936	473.503	507.252	321.585	365.26	296.881	288.073	359.716	377.215	1531.66	1676.25	1730.32	1783.7	1933.51	2005.16	2044.43	2094.46	2313.91	297.846	358.082	561.608	36.3669	24.4305	26.4321	21.6286	23.5784	18.1419	17.1239	19.5148
pgaptmp_000219	pgaptmp_000219	frdA	protein_coding	protein_coding	pgaptmp_000219	0.4904	1821	GO:0009061	GO:0000104		TRUE	-3.00796	2.29152e-06	2.09716e-05	Chromosome_I	236299	238119	1821	-	11.0096	16017.5	10344	7731.3	4925	5403.8	2875.62	6996.18	10622.8	10776.7	306.737	281.189	268.626	497.845	529.44	513.807	552.823	655.101	584.761	2716.94	4170.19	6554.03	362.445	234.758	177.208	145.7	153.438	77.2955	182.929	253.493
pgaptmp_003251	pgaptmp_003251	atpF	protein_coding	protein_coding	pgaptmp_003251	0.4671	471	GO:0015986	GO:0015078		TRUE	2.18949	2.29401e-06	2.09716e-05	Chromosome_I	3520649	3521119	471	-	15.2039	38671	25813.8	23155.5	12473.9	16949.4	8844.57	12632.9	27158.5	21248.6	111293	131533	133746	74832.9	73929.5	79968.1	97789	88557.1	103913	15608.7	14439.9	23430.5	3383.16	2265.03	2051.99	1426.75	1860.71	919.155	1277.07	2505.66
pgaptmp_003959	pgaptmp_003959	pgaptmp_003959	protein_coding	protein_coding	pgaptmp_003959	0.43	600		GO:0015035		TRUE	-1.36288	2.29892e-06	2.09716e-05	Chromosome_II	727110	727709	600	+	9.26646	763.984	806.187	889.529	1231.89	1106.7	1048.98	1117.4	1081.39	1130.24	405.619	388.222	346.435	296.056	347.41	329.363	303.378	262.307	317.517	843.245	951.276	909.706	52.4676	55.5298	61.8799	110.608	95.3727	85.5752	88.6726	78.3189
pgaptmp_000982	pgaptmp_000982	pgaptmp_000982	protein_coding	protein_coding	pgaptmp_000982	0.45	360				TRUE	-2.04197	2.30518e-06	2.09716e-05	Chromosome_I	1039062	1039421	360	-	8.56131	445.593	501.667	585.668	668.155	542.087	650.664	666.727	493.303	494.039	242.16	259.419	253.805	122.252	130.972	197.618	262.928	244.997	239.461	748.247	679.21	624.748	51.0028	57.591	67.9031	99.9859	77.8593	88.4681	88.1816	59.5455
pgaptmp_001464	pgaptmp_001464	pgaptmp_001464	protein_coding	protein_coding	pgaptmp_001464	0.4592	1374		GO:0005215		TRUE	1.7544	2.30674e-06	2.09716e-05	Chromosome_I	1515049	1516422	1374	-	12.8619	4409.68	4758.79	4946.73	3445.19	3544.05	5631.66	3793.96	3560.59	3169.03	21277.8	18210.2	21017.6	17249.3	14107.3	17593.3	11005.9	14042.1	9272.83	5785.92	5116.37	4483.73	132.245	143.137	150.27	135.08	133.37	200.624	131.474	112.609
pgaptmp_001943	pgaptmp_001943	fabV	protein_coding	protein_coding	pgaptmp_001943	0.463	1203	GO:0006633	GO:0004318		TRUE	-1.53166	2.30716e-06	2.09716e-05	Chromosome_I	2095679	2096881	1203	-	14.5725	35788.5	38065.9	38524.2	30210.5	32720.5	30630.7	29457	31387.8	30446.7	15992.7	22994	19459.6	11587.4	10553.3	11836	18819.6	17713	20355.5	31683.4	35506.2	37390.2	1225.85	1307.71	1336.62	1352.87	1406.37	1246.3	1165.88	1133.79
pgaptmp_001700	pgaptmp_001700	ccoP	protein_coding	protein_coding	pgaptmp_001700	0.4841	975		GO:0004129		TRUE	1.60508	2.32751e-06	2.11201e-05	Chromosome_I	1796743	1797717	975	+	11.4405	3217.83	2576.1	2472.55	1472.12	2097.34	1129.8	1888.07	3262.07	2825.59	6267.92	6630.61	5937.55	4682.39	4389.8	3989.25	2587.14	2533.86	3692.46	1353.44	1385.18	1822.73	135.993	109.194	105.848	81.3397	111.227	56.7189	92.2032	145.387
pgaptmp_000598	pgaptmp_000598	luxS	protein_coding	protein_coding	pgaptmp_000598	0.4451	519				TRUE	1.6612	2.35004e-06	2.12879e-05	Chromosome_I	603901	604419	519	+	10.1461	769.381	735.778	783.341	795.636	705.942	785.909	824.128	776.896	826.214	1341.97	1268.07	1359.8	2285.96	2841.44	2374.05	1874.2	1971.96	1737.08	805.245	714.253	991.122	61.0847	58.5896	62.9976	82.5869	70.3308	74.1204	75.6066	65.0479
pgaptmp_002986	pgaptmp_002986	rplX	protein_coding	protein_coding	pgaptmp_002986	0.4151	318	GO:0006412	GO:0003735	GO:0005840	TRUE	2.35122	2.36969e-06	2.1429e-05	Chromosome_I	3239645	3239962	318	-	16.7686	106266	81769.9	66731.8	37227	51011.5	39447.2	41360.1	79940.4	68580.7	297191	331444	406986	298037	221801	237356	247853	220324	212922	46957.9	45075.7	66303	13769.8	10626.9	8758.84	6306.61	8294.4	6071.86	6192.8	10923.9
pgaptmp_000776	pgaptmp_000776	pgaptmp_000776	protein_coding	protein_coding	pgaptmp_000776	0.4393	585				TRUE	2.92327	2.37764e-06	2.1464e-05	Chromosome_I	822191	822775	585	+	10.548	625.218	719.055	748.217	661.749	591.244	740.552	651.878	633.607	624.938	2286.4	5208.34	3175.34	6638.42	3064.53	4858.77	3901.78	7831.92	5494.37	738.747	707.245	569.085	44.0387	50.7982	53.3842	60.9399	52.2582	61.963	53.057	47.0654
pgaptmp_003011	pgaptmp_003011	pgaptmp_003011	protein_coding	protein_coding	pgaptmp_003011	0.3993	288		GO:0004518		TRUE	1.66223	2.3831e-06	2.14764e-05	Chromosome_I	3258518	3258805	288	-	9.49899	651.43	716.415	804.578	521.455	542.087	429.652	399.442	434.345	463.074	1331.88	1005.02	1187.51	1374.23	1832.5	1764.07	549.452	716.35	648.265	601.839	556.876	490.161	93.2037	102.805	116.605	97.5414	97.3241	73.0226	66.038	65.536
pgaptmp_004851	pgaptmp_004851	pgaptmp_004851	protein_coding	protein_coding	pgaptmp_004851	0.4535	699	GO:0015031		GO:0005886	TRUE	-1.72715	2.39132e-06	2.15001e-05	Chromosome_II	1775315	1776013	699	+	8.42875	262.885	238.512	306.312	479.175	591.244	477.483	364.547	470.168	363.14	332.971	350.125	277.889	190.006	218.657	198.936	257.872	195.731	214.324	667.219	630.149	912.198	15.497	14.1018	18.2906	36.9302	43.7354	33.4359	24.8318	29.2289
pgaptmp_000009	pgaptmp_000009	glyQ	protein_coding	protein_coding	pgaptmp_000009	0.4739	918	GO:0006426	GO:0000166,GO:0004820,GO:0005524	GO:0005737	TRUE	1.8782	2.39389e-06	2.15001e-05	Chromosome_I	13114	14031	918	-	12.2661	5749.54	4151.51	3829.3	2834.69	3744.77	2114.45	2446.4	3939.71	3648.29	8267.76	8823.89	9233.31	10971.7	12015.1	11879.5	4476.52	5234.15	5393.83	2715.26	3102.96	4277.69	258.077	186.898	174.108	166.352	210.924	112.742	126.887	186.491
pgaptmp_004347	pgaptmp_004347	pgaptmp_004347	protein_coding	protein_coding	pgaptmp_004347	0.4342	2172	GO:0055085	GO:0022857	GO:0019867	TRUE	-1.57441	2.4245e-06	2.17378e-05	Chromosome_II	1208721	1210892	2172	-	11.478	1796.25	1710.07	1846.85	5625.18	6395.81	4106.03	2473.13	2790.41	2810.11	2990.68	3753.42	2604.74	1640.83	1878.01	1420.22	2639.39	2199.65	2087.68	5042.14	4846.86	5839.56	34.0773	32.5383	35.4906	139.521	152.258	92.5326	54.2149	55.8271
pgaptmp_000491	pgaptmp_000491	pgaptmp_000491	protein_coding	protein_coding	pgaptmp_000491	0.4834	1959				TRUE	2.23033	2.4325e-06	2.17725e-05	Chromosome_I	510917	512875	1959	+	7.28407	1288.21	943.485	870.742	73.67	61.4456	50.3048	69.791	88.8094	110.49	254.268	228.579	268.626	204.735	235.307	218.697	116.295	199.726	202.417	29.6169	56.707	42.3699	27.0964	19.9041	18.5522	2.02591	1.62181	1.25692	1.69628	1.96998
pgaptmp_002699	pgaptmp_002699	secF	protein_coding	protein_coding	pgaptmp_002699	0.4652	948	GO:0006886,GO:0043952	GO:0015450	GO:0031522	TRUE	1.72667	2.44686e-06	2.18639e-05	Chromosome_I	2921296	2922243	948	-	13.3697	10057.5	9403.17	9314.32	5684.76	7280.63	5597.85	6905.6	8404.06	7865.22	17536.5	19278.7	18259.1	24149.9	17840	19457.5	11889.1	11990.2	16869.4	6072.03	6550.61	7132.26	437.158	409.928	410.094	323.049	397.104	289.032	346.837	385.228
pgaptmp_004755	pgaptmp_004755	moeA	protein_coding	protein_coding	pgaptmp_004755	0.4862	1236	GO:0006777,GO:0032324			TRUE	1.59618	2.46753e-06	2.20112e-05	Chromosome_II	1675754	1676989	1236	+	11.0967	1541.85	1401.15	1286.51	1236.37	1455.58	1138.04	1476.75	1988.88	2029.64	3596.08	3316.21	3751.5	4302.38	3761.57	4459.58	3183.79	3336.75	3925.31	1218.21	1470.56	1705.59	51.4021	46.8497	43.4445	53.8885	60.8921	45.0685	56.888	69.9243
pgaptmp_000640	pgaptmp_000640	pgaptmp_000640	protein_coding	protein_coding	pgaptmp_000640	0.4349	1014				TRUE	-1.83702	2.48458e-06	2.20599e-05	Chromosome_I	652424	653437	1014	+	12.8499	7441.72	8156.04	8860.98	9769.92	8963.55	12774.1	7018.45	6635.33	6542.85	6427.34	5984.79	5894.94	4006.33	4738.32	4398.98	6013.63	4709.54	3880.33	20250.2	15036.3	14660	302.408	332.417	364.741	519.06	457.074	616.631	329.561	284.356
pgaptmp_000143	pgaptmp_000143	secE	protein_coding	protein_coding	pgaptmp_000143	0.4514	381				TRUE	1.70759	2.4877e-06	2.20599e-05	Chromosome_I	146161	146541	381	+	14.4069	18261.6	16190.6	16298.2	9600.8	11868.6	11230.3	10988.4	13961	12991.4	38045.4	40627.3	44614.1	47497	37169.5	41710.6	42162.9	41078.3	42859.6	12357	14195.2	14617.6	1975.02	1756.23	1785.49	1357.52	1610.71	1442.78	1373.22	1592.31
pgaptmp_000206	pgaptmp_000206	pfkA	protein_coding	protein_coding	pgaptmp_000206	0.4756	963	GO:0006002,GO:0006096	GO:0005524		TRUE	-1.69575	2.48821e-06	2.20599e-05	Chromosome_I	224044	225006	963	+	15.3099	72861.5	83064.5	90172.4	63310.1	60138.2	53206.8	86693.8	88557.9	84211.9	20167.9	21482.8	22155.1	18913.7	18751.3	19402.1	16119.5	16978	16964.7	56313.5	73049.5	67317.4	3117.67	3564.77	3908.3	3541.69	3229	2704.42	4286.42	3996.12
pgaptmp_000014	pgaptmp_000014	pgaptmp_000014	protein_coding	protein_coding	pgaptmp_000014	0.4777	942		GO:0003677,GO:0003700		TRUE	-1.84034	2.48976e-06	2.20599e-05	Chromosome_I	16265	17206	942	+	10.4647	2980.39	2979.2	2997.77	1893	2070.72	1413.48	3317.3	3602.38	3430.12	609.437	600.474	596.534	614.205	620.454	598.124	692.714	687.057	792.47	1759.69	2715.56	2581.24	130.371	130.704	132.828	108.259	113.662	73.4467	167.674	166.179
pgaptmp_003010	pgaptmp_003010	pgaptmp_003010	protein_coding	protein_coding	pgaptmp_003010	0.4348	345				TRUE	1.61516	2.49897e-06	2.21043e-05	Chromosome_I	3258177	3258521	345	+	9.41631	566.628	689.132	660.816	485.581	552.328	385.12	369.744	400.016	431.405	1198.69	912.503	968.905	1191.59	1708.19	1495.31	770.244	830.86	730.29	510.752	504.629	491.823	67.6764	82.5514	79.9471	75.8241	82.7793	54.6399	51.0287	50.3843
pgaptmp_000896	pgaptmp_000896	fliI	protein_coding	protein_coding	pgaptmp_000896	0.5015	1320	GO:0044780,GO:0071973	GO:0016887		TRUE	2.02595	2.50973e-06	2.21623e-05	Chromosome_I	943967	945286	1320	+	10.7326	1570.37	1401.15	1395.15	770.652	1040.48	999.498	896.888	1053.03	1007.78	2308.6	3181.97	2991.93	4570.45	2870.3	3082.84	3239.41	3417.98	3998.07	860.009	889.472	983.645	49.0215	43.8683	44.1151	31.452	40.7571	37.063	32.3517	34.6659
pgaptmp_003186	pgaptmp_003186	pgaptmp_003186	protein_coding	protein_coding	pgaptmp_003186	0.4679	1716				TRUE	1.39763	2.51728e-06	2.21872e-05	Chromosome_I	3456353	3458068	1716	-	10.4595	1894.93	1990.82	2057.6	1026.25	1220.72	1401.94	1263.66	1304.53	1203.43	1467.09	1692.58	1704.38	1969.29	1666.01	1617.83	1761.28	1882.75	1873.35	663.308	728.271	713.641	45.5023	47.9465	50.0477	32.2183	36.7826	39.9893	35.0628	33.035
pgaptmp_002235	pgaptmp_002235	pgaptmp_002235	protein_coding	protein_coding	pgaptmp_002235	0.4535	591				TRUE	-1.4236	2.52098e-06	2.21872e-05	Chromosome_I	2421871	2422461	591	+	11.7216	10586.3	11034	13250.6	5459.27	4953.2	5478.27	4665.6	3841.94	4262.67	1454.98	1650.85	1350.54	1257.87	1371.88	1466.33	2430.4	2501.9	2419.75	4306.19	3863.08	3544.94	738.1	771.593	935.815	497.635	433.354	453.721	375.883	282.488
pgaptmp_002835	pgaptmp_002835	ftsW	protein_coding	protein_coding	pgaptmp_002835	0.4645	1197	GO:0051301			TRUE	1.74635	2.53118e-06	2.22398e-05	Chromosome_I	3082264	3083460	1197	-	11.7123	2524	2466.09	2411.28	1659.18	2016.1	2432.77	1891.78	2168	1948.01	4633.34	5480.46	6006.1	7956.68	5650.69	6433.13	6204.09	6266.07	6988.03	1916.16	2023.61	2406.77	86.8868	85.1444	84.0805	74.6728	87.0887	99.481	75.2505	78.7049
pgaptmp_002765	pgaptmp_002765	ribF	protein_coding	protein_coding	pgaptmp_002765	0.4573	936		GO:0003919		TRUE	1.35435	2.53851e-06	2.22669e-05	Chromosome_I	2994655	2995590	936	-	12.8985	6137.32	5681.15	5698.21	4497.07	5148.46	5162.43	4190.43	4918.1	4732.08	14208.8	13821.8	16899.3	13519.9	12121.6	12460.5	11428.9	11581.4	11303.6	5298.64	5018.89	5526.36	270.185	250.843	254.099	258.832	284.41	269.967	213.165	228.328
pgaptmp_002983	pgaptmp_002983	rpsH	protein_coding	protein_coding	pgaptmp_002983	0.4377	393	GO:0006412	GO:0003735	GO:0005840	TRUE	2.80796	2.54291e-06	2.22685e-05	Chromosome_I	3238337	3238729	393	-	16.3024	92825.3	61954.9	48496.1	25088.8	37696.9	18079.2	24912.4	60819.5	50883.2	253905	264644	316971	250929	228487	241895	125361	141034	137734	28202.6	28907.8	52943.2	9732.67	6515.16	5150.56	3439.15	4959.72	2251.75	3018.26	6724.93
pgaptmp_002673	pgaptmp_002673	guaA	protein_coding	protein_coding	pgaptmp_002673	0.4582	1554	GO:0006177	GO:0003922,GO:0005524,GO:0016462		TRUE	1.50849	2.57081e-06	2.24754e-05	Chromosome_I	2894899	2896452	1554	-	12.8483	7117.93	6038.48	6246.31	3791.12	4650.75	3855.33	4373.82	5569.62	5320.42	12453.1	12802.3	15102.3	15499.5	13297	14144.2	8981.69	9592.17	7681.27	4980.12	4990.22	6091.29	188.739	160.59	167.77	131.426	154.745	121.435	134.012	155.744
pgaptmp_002049	pgaptmp_002049	pgaptmp_002049	protein_coding	protein_coding	pgaptmp_002049	0.4288	513				TRUE	3.1691	2.5846e-06	2.25539e-05	Chromosome_I	2214961	2215473	513	-	7.5237	133.37	110.015	116.807	63.4202	86.0239	80.8175	82.4128	123.885	92.1925	223.998	547.865	311.235	978.015	437.315	561.235	377.538	752.301	514.643	68.1748	83.4676	57.3239	10.7127	8.86287	9.50368	6.66001	8.67053	7.71118	7.64909	10.494
pgaptmp_002674	pgaptmp_002674	guaB	protein_coding	protein_coding	pgaptmp_002674	0.4836	1464	GO:0006164	GO:0003938		TRUE	1.72043	2.58836e-06	2.25539e-05	Chromosome_I	2896579	2898042	1464	-	12.4235	5300.86	3975.49	3576.09	2921.82	4007.62	2210.11	1857.63	3079.22	3024.76	10324.1	11648.5	12229	13572.9	13757.7	14029.6	6502.41	7447.11	6424.43	4025.67	3798.73	5540.48	149.198	112.225	101.955	107.517	141.543	73.8935	60.4158	91.3982
pgaptmp_001606	pgaptmp_001606	pgaptmp_001606	protein_coding	protein_coding	pgaptmp_001606	0.4696	1416	GO:0055085	GO:0015562		TRUE	1.9822	2.60333e-06	2.25913e-05	Chromosome_I	1675897	1677312	1416	-	6.83251	83.2597	84.4912	121.708	50.6081	65.542	63.4995	72.7608	59.7038	80.9323	585.221	509.768	479.821	213.572	278.594	185.761	104.497	79.8904	95.2552	62.5867	52.2469	47.3545	2.42287	2.46598	3.58753	1.9254	2.39332	2.19503	2.44662	1.83221
pgaptmp_003727	pgaptmp_003727	pgaptmp_003727	protein_coding	protein_coding	pgaptmp_003727	0.4378	402		GO:0046872		TRUE	-1.65787	2.60519e-06	2.25913e-05	Chromosome_II	486161	486562	402	+	10.6403	1936.56	2977.44	2482.35	3207.53	2573.89	4985.95	4539.38	2941.16	3407.6	667.959	504.326	535.399	908.788	861.311	703.52	770.244	712.356	579.469	3085.19	2812.41	2456.62	198.501	306.096	257.738	429.842	331.061	607.092	537.655	317.929
pgaptmp_000136	pgaptmp_000136	birA	protein_coding	protein_coding	pgaptmp_000136	0.4555	966	GO:0006355,GO:0036211	GO:0004077		TRUE	2.61315	2.60675e-06	2.25913e-05	Chromosome_I	142075	143040	966	+	10.9044	1988.21	1350.98	1307.75	963.475	1213.89	600.359	781.808	1342.59	1404	2282.36	1743.37	2026.73	7809.39	7480.97	6646.55	3279.86	3524.5	3609.11	803.01	1306.17	1698.95	84.8093	57.7981	56.505	53.7313	64.9751	30.4205	38.535	60.3954
pgaptmp_000798	pgaptmp_000798	pgaptmp_000798	protein_coding	protein_coding	pgaptmp_000798	0.4635	192				TRUE	-2.10651	2.60982e-06	2.25913e-05	Chromosome_I	845774	845965	192	-	12.5838	7357.69	11418.6	11804.8	8555.33	7149.54	13284.6	13442.9	10173.5	9656.28	3612.23	3972.93	3440.26	2293.33	2060.04	2226.5	5329.35	3589.74	3515.18	12558.7	10048	7536.02	1579.06	2457.85	2566.25	2400.49	1925.4	3386.72	3333.69	2302.54
pgaptmp_004848	pgaptmp_004848	hutX	protein_coding	protein_coding	pgaptmp_004848	0.4722	504				TRUE	-1.76188	2.62064e-06	2.26477e-05	Chromosome_II	1772505	1773008	504	-	9.6065	504.954	454.14	628.96	1641.24	1532.04	1237	648.165	831.376	772.024	799.129	954.228	766.973	409.47	499.471	357.03	539.339	619.15	537.134	1398.7	1431.69	1815.26	41.2838	37.2393	52.0875	175.431	157.175	120.136	61.2333	71.681
pgaptmp_004738	pgaptmp_004738	pgaptmp_004738	protein_coding	protein_coding	pgaptmp_004738	0.4251	207				TRUE	-2.29797	2.63662e-06	2.27484e-05	Chromosome_II	1654677	1654883	207	-	9.48004	77.0923	80.0906	102.104	1835.98	1136.74	2291.75	2096.7	1313.48	1534.9	1049.36	772.816	1287.55	440.401	350.74	500.632	407.875	383.474	449.816	2979.58	1812.08	2052.03	15.3461	15.9902	20.5879	477.818	283.946	541.914	482.279	275.735
pgaptmp_001646	pgaptmp_001646	pgaptmp_001646	protein_coding	protein_coding	pgaptmp_001646	0.452	615		GO:0016407		TRUE	-2.37857	2.64283e-06	2.27512e-05	Chromosome_I	1719397	1720011	615	+	7.25789	649.117	544.792	613.44	418.317	363.895	244.102	510.811	538.827	496.15	66.5941	19.9553	51.8725	39.7687	36.6279	44.7934	37.0796	43.9397	44.9816	174.908	296.915	311.543	43.4917	36.6098	41.633	36.6433	30.5946	19.428	39.5474	38.0725
pgaptmp_005190	pgaptmp_005190	pgaptmp_005190	protein_coding	protein_coding	pgaptmp_005190	0.4676	1482				TRUE	1.36704	2.64559e-06	2.27512e-05	Chromosome_II	2160058	2161539	1482	+	7.64425	91.7398	101.213	111.089	149.262	144.056	126.174	98.0044	125.378	151.308	300.683	284.817	257.51	424.199	430.655	490.093	291.58	371.49	293.704	191.113	162.475	184.433	2.55075	2.82248	3.1287	5.42581	5.02605	4.16731	3.14869	3.6763
pgaptmp_002909	pgaptmp_002909	calR	protein_coding	protein_coding	pgaptmp_002909	0.4552	960				TRUE	-1.61695	2.65517e-06	2.27963e-05	Chromosome_I	3165980	3166939	960	-	13.9848	33683.9	43427.6	44181.6	35672.9	30734.4	32642.9	50943	47376.5	43822.4	4364.94	4814.68	5020.52	6877.03	6964.85	7011.49	6814.22	6677.5	5645.19	25600.8	22750.3	19630.5	1445.8	1869.55	1920.93	2001.85	1655.38	1664.37	2526.65	2144.51
pgaptmp_004224	pgaptmp_004224	pgaptmp_004224	protein_coding	protein_coding	pgaptmp_004224	0.504	1605				TRUE	2.12129	2.65988e-06	2.27996e-05	Chromosome_II	1073279	1074883	1605	-	5.64564	33.9206	27.2836	22.8713	32.0304	40.9638	24.7401	24.5011	32.8371	32.3729	68.6121	79.8213	85.2192	114.887	130.972	130.428	101.126	114.51	124.361	26.8229	15.2918	29.9081	0.870857	0.702536	0.59478	1.07511	1.31968	0.754499	0.726847	0.889052
pgaptmp_004707	pgaptmp_004707	choV	protein_coding	protein_coding	pgaptmp_004707	0.4793	1185	GO:0015871	GO:0015220	GO:0055052	TRUE	1.81798	2.67807e-06	2.29182e-05	Chromosome_II	1623358	1624542	1185	-	6.36692	63.2157	39.6053	45.7425	46.7644	54.6184	33.8114	48.2597	76.1224	60.5233	100.9	76.1931	96.3347	207.681	183.139	177.856	229.219	182.416	223.585	39.1167	52.8841	61.4778	2.19819	1.38126	1.61118	2.12599	2.38322	1.39662	1.9391	2.79146
pgaptmp_004042	pgaptmp_004042	pgaptmp_004042	protein_coding	protein_coding	pgaptmp_004042	0.4457	543				TRUE	1.41026	2.73398e-06	2.33422e-05	Chromosome_II	811491	812033	543	-	9.70464	521.915	479.664	425.569	811.01	869.797	496.451	521.205	535.842	579.194	1144.21	1101.17	1081.91	1780.75	2065.59	2312.13	750.019	766.947	998.857	778.423	781.155	888.936	39.6057	36.5072	32.7123	80.462	82.8251	44.7516	45.7027	42.8819
pgaptmp_004850	pgaptmp_004850	pgaptmp_004850	protein_coding	protein_coding	pgaptmp_004850	0.4622	753	GO:0006810	GO:0015291		TRUE	-2.54369	2.73922e-06	2.33422e-05	Chromosome_II	1774563	1775315	753	+	7.9193	269.052	238.512	240.148	465.722	513.413	272.141	322.226	429.868	392.698	183.638	145.13	150.06	73.6457	124.313	100.126	170.229	103.857	108.485	519.693	583.636	892.259	14.7231	13.0905	13.3115	33.3193	35.2546	17.6901	20.3751	24.8072
pgaptmp_001214	pgaptmp_001214	pgaptmp_001214	protein_coding	protein_coding	pgaptmp_001214	0.4407	624				TRUE	-2.96031	2.74092e-06	2.33422e-05	Chromosome_I	1296897	1297520	624	+	8.41939	1090.86	1027.98	1088.02	796.917	727.79	522.015	1034.24	960.485	1230.88	127.134	88.892	87.0718	61.8624	122.093	115.936	70.7883	82.5534	100.547	612.456	984.408	1085.83	72.0346	68.0832	72.7768	68.8007	60.3066	40.9479	78.917	66.8873
pgaptmp_004279	pgaptmp_004279	pgaptmp_004279	protein_coding	protein_coding	pgaptmp_004279	0.413	828				TRUE	-1.79037	2.75441e-06	2.34191e-05	Chromosome_II	1131000	1131827	828	+	7.83748	530.395	745.459	720.445	456.113	487.469	515.418	617.724	618.681	629.865	94.8462	112.476	85.2192	75.1186	78.8055	93.5392	45.5068	55.9232	91.2862	365.462	342.153	265.019	26.3953	37.2079	36.3171	29.6761	30.4411	30.4693	35.522	32.4694
pgaptmp_005080	pgaptmp_005080	pgaptmp_005080	protein_coding	protein_coding	pgaptmp_005080	0.4566	357				TRUE	-1.82341	2.76399e-06	2.34205e-05	Chromosome_II	2041289	2041645	357	+	5.86922	171.916	168.982	164.183	96.0913	83.293	75.0448	297.725	282.847	244.205	18.162	10.8847	11.1155	14.7291	22.1987	15.8094	25.2815	18.6411	30.4287	87.1744	96.2108	84.7397	19.8429	19.5621	19.1956	14.5004	12.0638	10.2893	39.7082	34.4287
pgaptmp_002692	pgaptmp_002692	iscA	protein_coding	protein_coding	pgaptmp_002692	0.4259	324	GO:0016226	GO:0051536		TRUE	2.14008	2.76619e-06	2.34205e-05	Chromosome_I	2915958	2916281	324	-	13.0845	6901.3	6881.63	6592.64	3387.54	4194.69	5382.61	5034.6	5478.57	5410.5	14128	16029.6	15672.9	28159.2	17571.4	18445.7	16227.4	15385.6	13036.7	5028.73	5234.25	5220.63	877.696	877.785	849.289	563.253	669.42	813.169	739.866	734.784
pgaptmp_002773	pgaptmp_002773	pgaptmp_002773	protein_coding	protein_coding	pgaptmp_002773	0.476	792				TRUE	1.31362	2.76791e-06	2.34205e-05	Chromosome_I	3002868	3003659	792	-	10.5381	1155.61	1158.23	1204.01	869.306	1002.93	1072.89	954.8	1125.42	1070.42	1830.33	1981.02	1987.83	2492.17	2187.68	2335.85	2769.17	2834.78	3335.26	900.243	1039.84	1047.62	60.1237	60.4384	63.452	59.1305	65.4771	66.3078	57.4011	61.7484
pgaptmp_002764	pgaptmp_002764	ileS	protein_coding	protein_coding	pgaptmp_002764	0.4726	2829	GO:0006428	GO:0000166,GO:0004822,GO:0005524		TRUE	1.7835	2.78109e-06	2.34942e-05	Chromosome_I	2991762	2994590	2829	-	14.394	22854	17316.3	16658.4	10383.6	13252.5	8505.63	10678	17402.9	14976.7	36580.4	37710.1	42276.1	43212.3	42222	43279.7	34411.5	35391.4	36248.6	11693.7	11768.9	16382.2	332.88	252.967	245.778	197.733	242.219	147.166	179.718	267.317
pgaptmp_000887	pgaptmp_000887	pgaptmp_000887	protein_coding	protein_coding	pgaptmp_000887	0.4052	306				TRUE	-1.45134	2.80915e-06	2.36932e-05	Chromosome_I	934682	934987	306	+	10.0527	1218.06	1402.91	1627.13	1475.32	1434.41	1786.23	1780.41	1436.62	1598.94	801.147	1064.89	850.339	516.993	439.535	474.283	692.714	769.61	711.768	1575.29	1308.72	1319.28	164.023	189.474	221.943	259.734	242.38	285.726	277.033	204.014
pgaptmp_002871	pgaptmp_002871	pgaptmp_002871	protein_coding	protein_coding	pgaptmp_002871	0.4703	1533				TRUE	-1.48674	2.84922e-06	2.39927e-05	Chromosome_I	3122796	3124328	1533	-	13.6876	27937.5	32023.9	31992	18090.8	19478.3	14537.3	27560	30677.3	27560.6	5036.94	5643.73	5750.44	7245.26	6078.01	6547.75	6143.41	6413.86	6904.68	18104.3	20761.8	20437.2	750.936	863.325	871.044	635.74	656.98	464.166	855.993	869.586
pgaptmp_000220	pgaptmp_000220	epmA	protein_coding	protein_coding	pgaptmp_000220	0.4918	972	GO:0006418	GO:0004812		TRUE	1.91912	2.85692e-06	2.40192e-05	Chromosome_I	238569	239540	972	+	11.1052	2227.2	2109.64	1896.68	1353.61	1559.35	1229.58	1631.18	1867.24	1933.93	1965.54	1661.74	1971.16	5904.91	4812.68	5231.61	2870.3	3686.94	3647.48	1125.44	1533.64	1818.58	94.417	89.6982	81.4459	75.0223	82.9511	61.919	79.9039	83.4777
pgaptmp_000394	pgaptmp_000394	mreD	protein_coding	protein_coding	pgaptmp_000394	0.4642	489				TRUE	1.79918	2.86729e-06	2.40679e-05	Chromosome_I	427030	427518	489	+	11.0216	1399.22	1457.47	1526.66	1144.77	1227.55	1570.99	1294.1	1387.37	1225.25	2679.91	2686.71	3342.07	5239.15	3415.27	4051.17	4257.41	3994.52	4880.51	1245.59	1352.05	1266.94	117.906	123.178	130.309	126.117	129.8	157.253	126.006	123.288
pgaptmp_005237	pgaptmp_005237	pgaptmp_005237	protein_coding	protein_coding	pgaptmp_005237	0.4976	828		GO:0016853		TRUE	1.38537	2.90039e-06	2.43069e-05	Chromosome_II	2215018	2215845	828	-	5.8861	16.9603	20.2427	19.6039	42.2802	48.4738	18.9674	25.986	31.3445	31.6692	108.972	125.174	127.829	113.414	120.983	113.301	160.116	225.024	207.709	40.7931	42.0524	42.3699	0.844037	1.01037	0.988221	2.75087	3.02706	1.12127	1.49431	1.64501
pgaptmp_004881	pgaptmp_004881	pgaptmp_004881	protein_coding	protein_coding	pgaptmp_004881	0.5005	1053				TRUE	1.52463	2.91498e-06	2.43904e-05	Chromosome_II	1814021	1815073	1053	+	7.53392	124.889	131.137	130.693	131.325	159.759	122.876	147.749	192.545	168.199	219.962	197.739	227.869	381.485	318.552	420.268	202.252	241.003	251.368	119.585	141.449	135.417	4.88715	5.14683	5.18042	6.71866	7.84477	5.71176	6.68081	7.94586
pgaptmp_004685	pgaptmp_004685	pgaptmp_004685	protein_coding	protein_coding	pgaptmp_004685	0.4535	699				TRUE	-2.29379	2.95767e-06	2.47083e-05	Chromosome_II	1599082	1599780	699	-	8.21711	1092.4	906.52	913.217	872.509	948.311	479.957	833.037	1119.45	1019.75	86.7742	72.5649	96.3347	91.3206	122.093	94.8567	69.1029	49.2657	59.5345	398.432	628.237	695.364	64.3964	53.5972	54.5303	67.2445	70.1484	33.6092	56.744	69.5927
pgaptmp_003285	pgaptmp_003285	pgaptmp_003285	protein_coding	protein_coding	pgaptmp_003285	0.4669	1026		GO:0016747		TRUE	-1.53291	2.96966e-06	2.47691e-05	Chromosome_II	21347	22372	1026	+	8.79118	536.562	720.816	645.296	770.011	759.195	698.494	1012.71	851.526	964.854	310.773	243.092	220.458	217.991	178.7	196.301	266.299	229.019	224.908	644.308	676.024	549.977	21.5492	29.0348	26.2514	40.431	38.2604	33.3233	46.9971	36.0652
pgaptmp_001210	pgaptmp_001210	nrdB	protein_coding	protein_coding	pgaptmp_001210	0.4356	1134	GO:0009263	GO:0016491		TRUE	1.80809	2.98548e-06	2.48411e-05	Chromosome_I	1289132	1290265	1134	-	13.3581	8485.55	8574.1	7116.23	5556	5896.05	3988.1	6158.68	7671.2	7146.68	12741.7	10240.7	11971.4	22628.4	29336.7	26009.2	21696.6	21044.5	20621.4	7541.7	6727.11	9440.17	308.337	312.476	261.926	263.945	268.839	172.141	258.588	293.959
pgaptmp_003174	pgaptmp_003174	pgaptmp_003174	protein_coding	protein_coding	pgaptmp_003174	0.4709	378		GO:0022857	GO:0016020	TRUE	2.43403	2.9916e-06	2.48411e-05	Chromosome_I	3440737	3441114	378	-	8.80447	316.849	357.327	310.396	89.0446	126.305	152.564	109.884	111.945	97.1188	900.03	1219.09	1265.32	1546.56	846.881	1038.15	2740.52	3648.33	3061.4	217.377	247.854	186.926	34.5397	39.0676	34.274	12.6905	17.2772	19.7557	13.8412	12.8691
pgaptmp_000144	pgaptmp_000144	nusG	protein_coding	protein_coding	pgaptmp_000144	0.4681	549	GO:0032784			TRUE	1.66897	2.99353e-06	2.48411e-05	Chromosome_I	146555	147103	549	+	14.8999	27818	24173.3	24602.1	14810.9	17421.9	16977.5	16674.1	20511.2	18948	53095.7	54831.8	60759.4	68352	55063.9	62031	40779.1	49092.6	45525.4	18653.6	21240.9	22165.2	2087.91	1819.72	1870.43	1453.36	1640.84	1513.68	1446.12	1623.52
pgaptmp_002222	pgaptmp_002222	cmoB	protein_coding	protein_coding	pgaptmp_002222	0.4835	972	GO:0002098	GO:0016765		TRUE	1.26454	2.99717e-06	2.48411e-05	Chromosome_I	2405144	2406115	972	+	10.4281	1386.89	1289.37	1242.4	825.744	958.552	658.91	775.125	848.541	906.442	2239.98	2539.77	2423.19	2238.83	2550.63	2663.89	1395.54	1705.66	1824.4	1076.27	1043.03	1165.59	58.7941	54.8218	53.3502	45.7661	50.991	33.1813	37.9698	37.9353
pgaptmp_001452	pgaptmp_001452	pgaptmp_001452	protein_coding	protein_coding	pgaptmp_001452	0.3853	423				TRUE	-2.02791	3.01124e-06	2.48955e-05	Chromosome_I	1504437	1504859	423	-	6.70856	172.687	234.991	247.5	207.557	210.963	243.277	244.268	258.965	237.167	48.4321	41.7248	48.1674	38.2958	28.8583	32.9363	48.8776	47.9342	30.4287	207.319	166.298	137.91	16.822	22.959	24.4217	26.4339	25.7876	28.151	27.4954	26.6035
pgaptmp_001471	pgaptmp_001471	pgaptmp_001471	protein_coding	protein_coding	pgaptmp_001471	0.4706	1800	GO:0006508	GO:0004222,GO:0008270		TRUE	1.56904	3.0132e-06	2.48955e-05	Chromosome_I	1521708	1523507	1800	+	9.59707	967.508	845.792	749.851	503.518	576.224	407.386	541.251	814.211	709.39	928.282	1044.93	1168.98	1422.83	1123.26	1190.98	994.407	1011.94	1090.14	428.049	386.754	510.1	22.1483	19.4193	17.3877	15.0698	16.5525	11.0781	14.3172	19.6563
pgaptmp_000499	pgaptmp_000499	pgaptmp_000499	protein_coding	protein_coding	pgaptmp_000499	0.4524	126				TRUE	3.15949	3.05953e-06	2.52387e-05	Chromosome_I	516431	516556	126	+	6.70107	286.012	154.901	227.896	22.4213	29.3574	18.1427	14.1067	17.9111	28.1504	353.151	529.723	431.654	399.16	301.903	316.189	251.13	254.318	343.977	40.2343	14.6546	43.2006	93.5346	50.8071	75.493	9.58638	12.0473	7.04798	5.33074	6.17718
pgaptmp_002971	pgaptmp_002971	rplQ	protein_coding	protein_coding	pgaptmp_002971	0.4724	381	GO:0006412	GO:0003735	GO:0005840	TRUE	2.32295	3.06931e-06	2.52798e-05	Chromosome_I	3231793	3232173	381	-	16.1295	74866.6	54334	47870.4	27290.6	29350.5	15290.2	25596.2	44389	40283.9	218586	177436	230010	135573	181844	190566	185337	164625	148805	31936	30161.1	46081	8096.95	5893.71	5244.24	3858.8	3983.23	1964.36	3198.77	5062.77
pgaptmp_002475	pgaptmp_002475	cysK	protein_coding	protein_coding	pgaptmp_002475	0.4716	969	GO:0006535	GO:0004124		TRUE	1.35754	3.16741e-06	2.60081e-05	Chromosome_I	2692504	2693472	969	+	12.0177	4738.09	4677.82	4718.83	3457.36	3260.03	2252.99	3523.7	4249.42	4217.63	7149.79	5933.99	6313.63	7064.09	6711.79	6662.36	3116.37	3858.7	2454.14	2464.35	2955.77	3054.78	201.483	199.509	203.26	192.214	173.957	113.807	173.144	190.565
pgaptmp_001211	pgaptmp_001211	nrdA	protein_coding	protein_coding	pgaptmp_001211	0.4586	2283	GO:0006260	GO:0004748,GO:0005524		TRUE	2.67525	3.16762e-06	2.60081e-05	Chromosome_I	1290347	1292629	2283	-	14.0824	13126.5	11271.7	8731.1	7626.44	9321.99	3751.42	5318.22	9604.85	8665.39	23760	22469.7	23978.1	54811.5	68862.7	64644.8	58749.2	56944.5	65457.5	8317.33	8025	15131.9	236.92	204.044	159.626	179.962	211.128	80.4308	110.916	182.819
pgaptmp_001453	pgaptmp_001453	pgaptmp_001453	protein_coding	protein_coding	pgaptmp_001453	0.375	240				TRUE	-1.8368	3.18468e-06	2.6076e-05	Chromosome_I	1504881	1505120	240	-	6.06064	97.1363	146.98	138.044	141.574	155.662	188.849	169.28	141.797	166.791	28.252	27.2118	38.9044	23.5666	21.0888	22.3967	25.2815	19.9726	19.8448	125.173	107.042	88.8936	16.6774	25.3097	24.0076	31.7788	33.5364	38.5156	33.5836	25.6739
pgaptmp_005271	pgaptmp_005271	pgaptmp_005271	protein_coding	protein_coding	pgaptmp_005271	0.4804	1251				TRUE	-1.94258	3.1858e-06	2.6076e-05	Chromosome_II	2255125	2256375	1251	+	8.1256	545.813	563.275	433.737	398.459	483.372	281.212	617.724	708.983	736.836	113.008	148.758	101.893	120.779	153.171	155.46	91.0135	81.2219	113.777	487.841	572.804	779.273	17.9782	18.6082	14.4714	17.1589	19.9788	11.003	23.511	24.6273
pgaptmp_000319	pgaptmp_000319	pgaptmp_000319	protein_coding	protein_coding	pgaptmp_000319	0.4332	1752				TRUE	-1.46465	3.20597e-06	2.62004e-05	Chromosome_I	337388	339139	1752	+	9.31175	1276.65	1549.01	1600.17	904.539	874.576	870.85	1083.99	1153.03	1079.57	272.43	288.445	287.152	362.337	313.002	295.11	337.087	320.893	329.424	1038.27	971.665	882.29	30.0258	36.5393	38.1218	27.8136	25.8112	24.33	29.4593	28.5985
pgaptmp_003169	pgaptmp_003169	pgaptmp_003169	protein_coding	protein_coding	pgaptmp_003169	0.4829	1377	GO:0055085	GO:0022857		TRUE	2.07675	3.22331e-06	2.63012e-05	Chromosome_I	3435843	3437219	1377	-	12.2608	2119.27	1791.92	1860.74	1794.99	1969.67	1455.54	2003.89	2178.44	2363.22	4603.07	6035.58	6120.96	13039.7	11254.8	16237.6	26587.7	27251.9	77593.3	2698.49	3264.79	4251.94	63.4176	53.7806	56.4018	70.2249	73.9613	51.7396	69.2904	68.7464
pgaptmp_002111	pgaptmp_002111	pgaptmp_002111	protein_coding	protein_coding	pgaptmp_002111	0.4872	1137	GO:0006810	GO:0005215	GO:0016020	TRUE	2.21374	3.22833e-06	2.63014e-05	Chromosome_I	2293891	2295027	1137	-	10.7747	1857.15	1215.44	1268.54	880.196	871.163	604.482	957.77	1350.8	1307.59	3255.04	3466.79	3091.97	4259.67	4469.71	4032.73	2332.64	2746.9	4017.92	796.304	763.952	1359.99	67.3047	44.1789	46.5676	41.7045	39.6171	26.0229	40.1082	51.6259
pgaptmp_003087	pgaptmp_003087	pgaptmp_003087	protein_coding	protein_coding	pgaptmp_003087	0.5	630		GO:0031992	GO:0016020	TRUE	1.30722	3.23435e-06	2.63097e-05	Chromosome_I	3339319	3339948	630	+	7.56445	151.872	177.784	185.421	115.95	161.807	130.298	120.278	118.661	142.159	248.214	253.977	261.215	326.987	277.484	304.332	273.041	315.567	309.579	123.497	122.334	128.771	9.93333	11.6625	12.2845	9.91505	13.2801	10.1235	9.09031	8.18476
pgaptmp_004596	pgaptmp_004596	pgaptmp_004596	protein_coding	protein_coding	pgaptmp_004596	0.4539	1194				TRUE	-1.49586	3.26283e-06	2.64909e-05	Chromosome_II	1488178	1489371	1194	-	13.6025	15667.5	19843.1	20483.7	23650.6	19543.8	20886.4	33530.1	31726.6	30057.6	5676.64	5895.9	7369.61	6955.1	5697.3	6446.3	4678.77	4801.41	5052.5	18564.2	20542	18199.1	540.695	686.827	716.052	1067.09	846.348	856.232	1337.1	1154.67
pgaptmp_001963	pgaptmp_001963	pgaptmp_001963	protein_coding	protein_coding	pgaptmp_001963	0.4408	735				TRUE	-2.13408	3.26774e-06	2.64909e-05	Chromosome_I	2123423	2124157	735	-	7.04772	102.533	139.939	156.832	92.8882	96.9476	118.752	83.8977	89.5557	85.1549	66.5941	85.2637	85.2192	110.469	98.7843	102.761	150.004	162.444	116.423	652.131	507.814	379.667	5.74822	7.8685	8.90609	6.80828	6.82014	7.90838	5.43495	5.29473
pgaptmp_003628	pgaptmp_003628	pgaptmp_003628	protein_coding	protein_coding	pgaptmp_003628	0.4498	867	GO:0006355	GO:0003700,GO:0043565		TRUE	-1.48776	3.27172e-06	2.64909e-05	Chromosome_II	377613	378479	867	+	7.88363	270.594	308.921	335.717	506.721	382.328	329.867	523.432	464.944	492.632	115.026	112.476	135.239	132.562	144.292	121.206	99.4407	99.8629	103.193	414.078	451.107	369.698	12.8605	14.7255	16.162	31.4858	22.8014	18.6231	28.7458	23.3034
pgaptmp_003172	pgaptmp_003172	pgaptmp_003172	protein_coding	protein_coding	pgaptmp_003172	0.4401	609				TRUE	1.54695	3.32008e-06	2.68412e-05	Chromosome_I	3439744	3440352	609	-	9.30821	308.369	336.205	267.921	221.651	294.939	330.692	251.693	250.756	254.761	1202.73	1244.49	1235.68	1415.47	1046.67	1140.92	2821.42	2597.77	3769.2	462.136	414.152	417.052	20.8647	22.8154	18.3624	19.6072	25.0414	26.579	19.6783	17.8925
pgaptmp_001028	pgaptmp_001028	rsxB	protein_coding	protein_coding	pgaptmp_001028	0.4848	594	GO:0022900	GO:0009055,GO:0051536		TRUE	1.28049	3.33509e-06	2.69211e-05	Chromosome_I	1089245	1089838	594	-	10.9264	1628.96	1595.65	1590.37	1237.66	1267.15	1289.78	1124.82	1348.56	1339.25	3164.23	3347.05	3505.1	2973.81	2865.86	3225.13	2957.94	3146.35	3192.37	1176.3	1381.99	1395.71	113.001	111.018	111.751	112.248	110.302	106.283	90.1634	98.6555
pgaptmp_004277	pgaptmp_004277	pgaptmp_004277	protein_coding	protein_coding	pgaptmp_004277	0.4547	717				TRUE	-1.48527	3.35368e-06	2.70297e-05	Chromosome_II	1129287	1130003	717	+	10.0955	953.631	1210.16	1419.65	1883.39	1413.25	2055.9	2317.95	1877.69	1935.34	754.733	751.046	848.487	506.682	582.717	500.632	739.906	588.526	694.569	1808.31	1544.47	1426.45	54.8049	69.7534	82.6425	141.509	101.916	140.351	153.928	113.8
pgaptmp_000226	pgaptmp_000226	gpsA	protein_coding	protein_coding	pgaptmp_000226	0.4778	1038	GO:0006072	GO:0047952		TRUE	1.80372	3.39306e-06	2.73053e-05	Chromosome_I	243895	244932	1038	-	11.6522	3740.52	2623.63	2456.21	1850.72	2356.1	1429.15	1680.92	2634.43	2502.57	4066.28	4188.81	4475.86	7034.64	6852.75	6846.81	4795.06	4328.73	5958.74	1684.25	1921.67	2712.5	148.488	104.459	98.7664	96.0522	117.365	67.3928	77.1051	110.288
pgaptmp_001868	pgaptmp_001868	pgaptmp_001868	protein_coding	protein_coding	pgaptmp_001868	0.4629	633				TRUE	1.40917	3.40058e-06	2.7324e-05	Chromosome_I	2001423	2002055	633	+	11.7018	2520.92	2491.61	2542.79	2156.93	2189.51	2431.12	1686.86	1976.94	1867.78	6742.15	6347.61	7034.29	5813.59	5872.67	6456.84	4570.9	4738.83	4110.53	2704.64	2090.51	2452.47	164.102	162.674	167.667	183.568	178.85	187.991	126.885	135.715
pgaptmp_000922	pgaptmp_000922	pgaptmp_000922	protein_coding	protein_coding	pgaptmp_000922	0.4785	744	GO:0017004	GO:0015232,GO:0020037	GO:0016020	TRUE	1.4641	3.42121e-06	2.74479e-05	Chromosome_I	968745	969488	744	+	10.9534	1537.22	1605.33	1742.3	1284.42	1461.72	1260.92	1271.83	1547.08	1315.33	2092.67	2146.11	2389.84	3511.43	3212.16	3694.14	3827.62	3724.22	4445.24	1119.86	1490.31	1389.07	85.1376	89.1731	97.7442	93.0033	101.587	82.9558	81.3933	90.36
pgaptmp_000671	pgaptmp_000671	glmM	protein_coding	protein_coding	pgaptmp_000671	0.4646	1341	GO:0005975	GO:0000287,GO:0008966,GO:0016868		TRUE	1.95233	3.44974e-06	2.76347e-05	Chromosome_I	695739	697079	1341	+	13.1103	11270.9	9476.22	8271.23	5736.65	7399.42	3939.44	5829.77	8745.86	8395.85	11149.5	11737.4	11008.1	22266	19124.2	18381.1	8292.34	9199.37	8883.87	4378.28	5114.46	6971.09	346.328	292.044	257.444	230.459	285.307	143.793	206.993	283.408
pgaptmp_001449	pgaptmp_001449	pgaptmp_001449	protein_coding	protein_coding	pgaptmp_001449	0.3953	339				TRUE	-1.56337	3.46224e-06	2.76763e-05	Chromosome_I	1503312	1503650	339	-	6.65072	154.955	214.749	185.421	205.635	228.714	159.161	216.055	214.187	242.093	32.2881	54.4236	44.4622	64.8082	57.7167	50.0632	23.5961	27.9616	21.1678	186.084	217.271	190.249	18.835	26.1801	22.8296	32.6785	34.8849	22.981	30.3457	27.4557
pgaptmp_004166	pgaptmp_004166	pgaptmp_004166	protein_coding	protein_coding	pgaptmp_004166	0.4657	1518				TRUE	-1.33729	3.46546e-06	2.76763e-05	Chromosome_II	1006678	1008195	1518	+	6.62481	81.7178	80.9708	92.3019	168.48	167.951	126.174	100.974	141.05	143.567	80.7201	45.353	50.02	67.754	78.8055	71.1425	60.6757	62.5808	55.5655	208.995	204.528	213.511	2.21821	2.20444	2.53793	5.97917	5.72079	4.06848	3.16717	4.03775
pgaptmp_002941	pgaptmp_002941	pgaptmp_002941	protein_coding	protein_coding	pgaptmp_002941	0.4945	639		GO:0016831,GO:0106141		TRUE	1.76899	3.50655e-06	2.78859e-05	Chromosome_I	3200266	3200904	639	-	9.6456	755.504	520.149	535.841	360.022	493.613	366.978	378.653	535.842	522.893	988.822	1077.59	1165.28	1939.83	1401.85	1625.74	1665.21	2183.67	2429.01	419.108	519.283	596.501	48.7185	33.641	35.0006	30.3524	39.942	28.1107	28.2146	36.4396
pgaptmp_002362	pgaptmp_002362	pgaptmp_002362	protein_coding	protein_coding	pgaptmp_002362	0.458	1323			GO:0016020	TRUE	-1.41549	3.50667e-06	2.78859e-05	Chromosome_I	2570958	2572280	1323	+	7.28516	388.545	411.015	357.772	279.305	260.803	203.693	296.24	297.773	304.024	56.5041	97.9626	70.3985	67.754	71.0359	72.46	85.9572	89.2109	41.0127	200.613	237.66	205.203	12.1015	12.8392	11.2872	11.3732	10.1929	7.53615	10.6615	9.78054
pgaptmp_001018	pgaptmp_001018	pgaptmp_001018	protein_coding	protein_coding	pgaptmp_001018	0.4789	1326				TRUE	1.27109	3.50759e-06	2.78859e-05	Chromosome_I	1078932	1080257	1326	-	12.4121	3963.31	3748.42	4295.71	3591.89	4030.15	3480.93	2790.15	2967.28	2760.85	10011.3	11122.4	11069.2	9881.78	9905.07	10745.2	6895.12	7516.35	6567.32	4303.96	4270.23	4873.36	123.161	116.828	135.217	145.93	157.153	128.494	100.188	97.2417
pgaptmp_004054	pgaptmp_004054	pgaptmp_004054	protein_coding	protein_coding	pgaptmp_004054	0.4553	369				TRUE	-1.95382	3.51999e-06	2.79422e-05	Chromosome_II	823044	823412	369	-	8.27576	568.941	665.368	795.593	448.426	324.296	565.723	743.942	555.246	596.084	139.242	90.7061	170.438	117.833	152.061	139.65	141.577	142.471	148.175	705.218	600.202	456.099	63.533	74.5208	89.9924	65.4679	45.4422	75.043	95.9943	65.3877
pgaptmp_002812	pgaptmp_002812	pgaptmp_002812	protein_coding	protein_coding	pgaptmp_002812	0.4782	1470				TRUE	1.33984	3.53235e-06	2.79872e-05	Chromosome_I	3050176	3051645	1470	+	10.2631	1727.64	1447.79	1495.62	820.62	968.793	912.908	1009.74	1062.73	997.227	1685.03	1494.84	1296.81	1671.76	1951.27	1736.4	1934.88	1480.63	1177.46	816.422	717.439	700.349	48.4277	40.7034	42.4663	30.0738	34.0767	30.3978	32.7059	31.4154
pgaptmp_000118	pgaptmp_000118	pgaptmp_000118	protein_coding	protein_coding	pgaptmp_000118	0.4444	684				TRUE	1.21602	3.53629e-06	2.79872e-05	Chromosome_I	124801	125484	684	+	8.42944	309.14	315.962	309.579	237.666	235.542	193.797	258.375	296.28	253.353	409.655	451.716	403.865	558.234	551.638	607.346	473.607	519.287	490.829	244.2	252.314	274.989	18.6233	19.0906	18.8911	18.7187	17.8056	13.8683	17.9857	18.8228
pgaptmp_004548	pgaptmp_004548	pgaptmp_004548	protein_coding	protein_coding	pgaptmp_004548	0.4313	1776	GO:0009966	GO:0009975		TRUE	-1.45284	3.54268e-06	2.79956e-05	Chromosome_II	1431842	1433617	1776	+	11.0215	2157.04	2345.51	2406.38	4051.85	3773.45	3042.2	3370.76	3744.18	3635.62	1354.08	1128.38	1309.78	1050.19	1425.16	1333.26	1029.8	950.695	899.633	3730.06	3508.19	3900.52	50.0465	54.5803	56.5539	122.906	109.86	83.8451	90.3685	91.6117
pgaptmp_002982	pgaptmp_002982	rplF	protein_coding	protein_coding	pgaptmp_002982	0.4532	534	GO:0006412	GO:0003735,GO:0019843	GO:0005840	TRUE	3.00267	3.58042e-06	2.82515e-05	Chromosome_I	3237791	3238324	534	-	16.5757	110795	73831.2	55949.6	28695.4	47612.9	21734.1	28428.7	73852.1	61146.8	302957	329481	383655	366972	275081	302892	155515	168392	179370	31605.7	32409	62059.4	8549.41	5714	4373.18	2894.91	4610.28	1992.2	2534.83	6009.79
pgaptmp_000541	pgaptmp_000541	pgaptmp_000541	protein_coding	protein_coding	pgaptmp_000541	0.5029	1209	GO:0006744	GO:0016709		TRUE	1.8	3.68415e-06	2.89891e-05	Chromosome_I	548540	549748	1209	+	11.08	2004.4	1562.21	1585.47	1134.52	1504.74	950.018	1093.64	1705.29	1640.46	2564.88	3149.32	3193.87	4845.89	3700.53	4418.74	4144.49	4604.35	5213.9	1055.59	1280.69	1615.04	68.315	53.4016	54.7359	50.5533	64.3543	38.4626	43.0706	61.2928
pgaptmp_004883	pgaptmp_004883	pgaptmp_004883	protein_coding	protein_coding	pgaptmp_004883	0.4289	429	GO:0030254			TRUE	-2.04019	3.68492e-06	2.89891e-05	Chromosome_II	1816444	1816872	429	+	10.2295	1618.17	1472.44	1346.95	1508.63	1968.99	981.356	1723.24	2764.29	2472.31	918.192	1476.69	1187.51	427.145	462.843	574.41	488.776	668.416	728.967	1604.9	2160.6	2736.59	155.426	141.847	131.05	189.448	237.318	111.97	191.259	280.003
pgaptmp_000518	pgaptmp_000518	gshB	protein_coding	protein_coding	pgaptmp_000518	0.4753	951	GO:0006750	GO:0004363,GO:0005524,GO:0046872		TRUE	2.26831	3.69359e-06	2.9014e-05	Chromosome_I	526636	527586	951	-	11.9401	4875.32	3881.32	3099.06	2497.09	3037.46	1218.86	2466.44	4132.25	3977.65	4714.06	4078.15	4346.18	10363.4	12047.2	11547.5	4114.15	4119.68	4783.93	1766.4	2324.35	3413.68	211.242	168.671	136.016	141.455	165.148	62.7345	123.488	188.818
pgaptmp_004812	pgaptmp_004812	pgaptmp_004812	protein_coding	protein_coding	pgaptmp_004812	0.4625	720				TRUE	-1.40186	3.71232e-06	2.91177e-05	Chromosome_II	1737662	1738381	720	-	9.97531	1117.84	1354.5	1481.73	1811	1823.57	1737.58	2499.85	2255.31	2157.73	518.627	682.11	576.156	596.53	538.319	583.632	308.435	420.756	342.654	1653.52	1787.86	1423.13	63.9742	77.7478	85.897	135.503	130.959	118.126	165.316	136.117
pgaptmp_002693	pgaptmp_002693	iscU	protein_coding	protein_coding	pgaptmp_002693	0.4583	384	GO:0016226	GO:0005198,GO:0005506,GO:0051536		TRUE	1.85396	3.747e-06	2.9346e-05	Chromosome_I	2916355	2916738	384	-	12.2081	5825.09	3986.05	5217.1	2125.54	2296.7	1662.53	2682.5	3476.26	3283.74	7188.13	6699.55	6374.77	10076.2	14727.7	12576.4	5096.76	6288.7	5620.06	3165.66	3465.5	4366.59	625.072	428.996	567.073	298.196	309.255	211.92	332.614	393.385
pgaptmp_002522	pgaptmp_002522	prmC	protein_coding	protein_coding	pgaptmp_002522	0.4709	858	GO:0006412,GO:0018364	GO:0008757		TRUE	1.84919	3.75292e-06	2.93486e-05	Chromosome_I	2742091	2742948	858	-	11.2207	2472.35	1836.8	1828.88	1226.12	1604.41	954.142	1000.09	1441.1	1398.37	4520.33	4616.94	4748.19	4803.17	5469.77	5387.07	4036.62	3673.62	3807.56	1285.26	1312.54	2021.29	118.736	88.4743	88.9692	76.986	96.6881	54.4325	55.4989	72.9868
pgaptmp_000689	pgaptmp_000689	pgaptmp_000689	protein_coding	protein_coding	pgaptmp_000689	0.502	504		GO:0008080,GO:0016746		TRUE	-1.8116	3.77344e-06	2.94653e-05	Chromosome_I	715096	715599	504	+	11.0434	5050.31	6017.36	5975.12	4912.83	4778.42	3693.69	4632.93	5403.2	4959.39	633.653	772.816	868.865	1048.71	808.034	873.472	559.565	641.786	752.781	2663.85	3926.8	3676.21	412.901	493.42	494.831	525.128	490.228	358.726	437.682	465.862
pgaptmp_002974	pgaptmp_002974	rpsK	protein_coding	protein_coding	pgaptmp_002974	0.4949	390	GO:0006412	GO:0003735	GO:0005840	TRUE	2.73632	3.78982e-06	2.95494e-05	Chromosome_I	3233865	3234254	390	-	16.6475	128009	90572.8	66436.1	36571.7	64389.6	21383.7	31154.3	85309.3	69853.1	277645	388846	389807	371482	308714	339865	78856.5	112126	117075	42441.1	42572.9	78571.2	13524.9	9597.87	7110.18	5051.78	8536.8	2683.8	3803.52	9505.37
pgaptmp_005211	pgaptmp_005211	pgaptmp_005211	protein_coding	protein_coding	pgaptmp_005211	0.4417	840				TRUE	1.43993	3.82022e-06	2.97424e-05	Chromosome_II	2182309	2183148	840	+	8.22529	185.792	171.623	154.381	196.026	164.538	197.92	160.371	173.141	175.94	760.787	683.924	1100.44	530.249	446.194	604.711	436.528	436.734	472.307	191.113	207.713	203.541	9.11395	8.44379	7.67106	12.5718	10.1282	11.5331	9.09031	8.95691
pgaptmp_000033	pgaptmp_000033	pgaptmp_000033	protein_coding	protein_coding	pgaptmp_000033	0.4832	774				TRUE	1.73718	3.82692e-06	2.97505e-05	Chromosome_I	36817	37590	774	+	6.49747	114.867	75.6901	73.5148	58.936	59.3975	50.3048	25.986	55.226	57.7083	98.8822	119.732	107.45	169.385	190.909	193.666	178.656	225.024	213.001	48.6165	42.6895	68.1241	6.11525	4.04147	3.96437	4.10208	3.96799	3.18127	1.59857	3.10056
pgaptmp_001537	pgaptmp_001537	pgaptmp_001537	protein_coding	protein_coding	pgaptmp_001537	0.4317	366				TRUE	-1.36994	3.83687e-06	2.97838e-05	Chromosome_I	1593613	1593978	366	-	7.5173	373.898	385.491	419.034	324.789	217.791	286.985	373.456	235.084	301.209	84.7561	92.5202	68.5459	78.0644	84.3552	96.1741	165.173	111.846	89.9633	236.936	264.42	251.727	42.0949	43.5286	47.787	47.8062	30.7682	38.3805	48.5838	27.9112
pgaptmp_003836	pgaptmp_003836	pgaptmp_003836	protein_coding	protein_coding	pgaptmp_003836	0.4586	822	GO:0006355			TRUE	-1.28913	3.86051e-06	2.99232e-05	Chromosome_II	600903	601724	822	-	8.10751	260.572	327.403	304.678	438.176	456.063	348.835	442.505	449.271	456.036	153.368	175.97	164.881	166.439	189.799	160.729	148.318	191.737	158.759	443.136	458.753	482.684	13.0621	16.4609	15.4707	28.7171	28.6878	20.7721	25.6318	23.7506
pgaptmp_004259	pgaptmp_004259	pgaptmp_004259	protein_coding	protein_coding	pgaptmp_004259	0.4674	261				TRUE	-1.67146	3.89036e-06	3.01003e-05	Chromosome_II	1108437	1108697	261	+	7.65406	191.96	209.468	205.025	356.819	244.417	331.517	421.716	219.412	327.952	119.062	97.9626	85.2192	67.754	102.114	75.0949	315.176	209.046	332.07	297.287	280.349	315.697	30.306	33.1679	32.7873	73.6498	48.4211	62.1724	76.9329	36.5306
pgaptmp_000826	pgaptmp_000826	pgaptmp_000826	protein_coding	protein_coding	pgaptmp_000826	0.463	756		GO:0016765		TRUE	1.49851	3.89499e-06	3.01003e-05	Chromosome_I	871113	871868	756	+	12.0261	4501.42	3447.42	3414.35	2809.71	4054.73	2040.23	1899.21	2618.01	2779.85	7969.1	8401.2	7847.58	8732.91	8778.49	8825.62	3096.15	3870.69	4144.92	2808.58	3134.81	3974.46	245.35	188.458	188.507	200.218	277.322	132.096	119.614	150.483
pgaptmp_000135	pgaptmp_000135	murB	protein_coding	protein_coding	pgaptmp_000135	0.4234	1044		GO:0008762,GO:0071949		TRUE	1.91655	3.90052e-06	3.01003e-05	Chromosome_I	141035	142078	1044	+	11.4301	2776.09	2305.03	2388.41	1614.33	1551.84	1210.61	1891.78	2226.95	2571.54	3168.27	2459.95	2712.19	7701.87	8062.58	7394.87	3077.61	3824.08	3266.46	1573.05	2250.44	2700.04	109.57	91.2467	95.4882	83.3023	76.8584	56.7594	86.2786	92.6932
pgaptmp_002047	pgaptmp_002047	pgaptmp_002047	protein_coding	protein_coding	pgaptmp_002047	0.4528	519				TRUE	2.30935	3.97717e-06	3.06469e-05	Chromosome_I	2213875	2214393	519	-	8.34836	199.669	213.868	188.688	144.137	180.923	154.213	167.795	129.11	149.197	425.799	825.425	509.463	1285.85	652.643	988.09	578.104	1031.92	721.029	211.789	201.979	191.911	15.8526	17.0302	15.1746	14.9614	18.0248	14.5441	15.3938	10.8101
pgaptmp_004225	pgaptmp_004225	pgaptmp_004225	protein_coding	protein_coding	pgaptmp_004225	0.5103	1170				TRUE	1.6091	4.00244e-06	3.07965e-05	Chromosome_II	1074905	1076074	1170	-	5.58468	32.3788	23.7632	18.7871	39.7177	46.4256	36.2854	40.8352	35.076	35.188	48.4321	56.2378	74.1036	111.941	97.6744	89.5869	82.5863	71.9013	92.6092	29.0581	31.8579	24.9234	1.14034	0.839382	0.670216	1.82879	2.05171	1.51803	1.66181	1.30275
pgaptmp_004153	pgaptmp_004153	tssB	protein_coding	protein_coding	pgaptmp_004153	0.4556	507	GO:0033103	GO:0003674		TRUE	-3.17742	4.01047e-06	3.08133e-05	Chromosome_II	990643	991149	507	+	6.5587	65.5284	41.3655	38.391	101.857	98.313	61.0255	142.552	201.5	199.164	78.7021	61.6801	55.5777	61.8624	58.8266	25.0316	60.6757	62.5808	43.6586	379.432	544.77	702.01	5.32574	3.37188	3.16055	10.823	10.0264	5.89164	13.3874	17.2705
pgaptmp_003116	pgaptmp_003116	gspE	protein_coding	protein_coding	pgaptmp_003116	0.481	1503	GO:0015628	GO:0005524	GO:0015627	TRUE	1.5057	4.03215e-06	3.09347e-05	Chromosome_I	3370914	3372416	1503	-	11.83	4038.09	3316.28	2806.63	1788.58	2476.26	1606.45	1979.39	2901.61	2570.83	4748.36	5643.73	5550.36	6719.43	6034.72	6401.51	6089.48	5971.8	8244.87	2109.51	2161.87	2903.58	110.707	91.1872	77.9412	64.1082	85.1885	52.3169	62.7055	83.8913
pgaptmp_001269	pgaptmp_001269	tyrR	protein_coding	protein_coding	pgaptmp_001269	0.4537	1545	GO:0006355	GO:0008134		TRUE	1.32506	4.06308e-06	3.11266e-05	Chromosome_I	1357044	1358588	1545	+	11.9363	3304.17	3430.7	3159.5	2540.65	2950.07	2884.69	2575.58	3054.6	2806.59	6205.36	6131.73	6860.14	7005.18	5662.9	5983.88	5499.58	4982.5	5360.75	2595.11	2570.29	2742.41	88.1237	91.7689	85.3554	88.5893	98.7298	91.391	79.3743	85.9138
pgaptmp_002185	pgaptmp_002185	pgaptmp_002185	protein_coding	protein_coding	pgaptmp_002185	0.3848	408				TRUE	-1.85794	4.11933e-06	3.1506e-05	Chromosome_I	2366559	2366966	408	-	10.2695	1351.43	1588.61	1685.12	1212.67	1399.6	2114.45	1637.12	1189.6	1226.65	1146.23	1224.53	1120.82	455.13	513.901	557.283	1562.4	1051.89	1059.71	2521.91	1747.72	1672.36	136.487	160.916	172.39	160.121	177.372	253.671	191.052	126.7
pgaptmp_003258	pgaptmp_003258	mnmG	protein_coding	protein_coding	pgaptmp_003258	0.4662	1896	GO:0002098,GO:0008033			TRUE	1.85577	4.12831e-06	3.1506e-05	Chromosome_I	3525225	3527120	1896	-	13.3815	10664.9	8144.6	7249.37	4931.4	6469.54	4185.19	4428.76	6429.36	6269.79	19171	18524	20906.5	23596.1	26871.6	26928.8	15967.8	17729	17524.3	6414.58	6605.41	9765.84	231.781	177.531	159.589	140.119	176.433	108.046	111.218	147.356
pgaptmp_001027	pgaptmp_001027	rsxC	protein_coding	protein_coding	pgaptmp_001027	0.4991	2841		GO:0009055,GO:0051539	GO:0016020	TRUE	1.74611	4.14046e-06	3.1506e-05	Chromosome_I	1086396	1089236	2841	-	11.6217	3467.61	2961.59	2714.33	1745.66	2052.97	1319.47	1651.97	2362.78	2285.81	5854.23	6565.31	6302.51	5980.03	6886.05	6690.03	3455.14	3551.13	3634.25	1747.96	1795.51	2656.84	50.2941	43.082	39.8779	33.1018	37.3641	22.7332	27.6862	36.1401
pgaptmp_000385	pgaptmp_000385	pgaptmp_000385	protein_coding	protein_coding	pgaptmp_000385	0.4458	489			GO:0005886	TRUE	-1.29515	4.14372e-06	3.1506e-05	Chromosome_I	417306	417794	489	+	12.7711	6161.99	7374.5	6902.22	8807.09	6177.34	10325.7	10511	6019.64	7343.03	7038.8	7475.99	7067.63	4642.62	4595.14	4171.06	4936.64	5851.97	4346.02	11557.9	10908.1	12612.9	519.242	623.254	589.143	970.259	653.185	1033.58	1023.45	534.932
pgaptmp_002958	pgaptmp_002958	cysC	protein_coding	protein_coding	pgaptmp_002958	0.4773	618	GO:0000103	GO:0004020,GO:0005524		TRUE	1.90344	4.15826e-06	3.1506e-05	Chromosome_I	3217747	3218364	618	-	7.19987	149.559	160.181	121.708	125.559	114.016	89.8889	109.141	111.198	104.86	191.71	103.405	159.323	372.647	288.583	280.618	180.342	300.92	209.032	65.3808	100.671	82.2474	9.972	10.7119	8.21998	10.9452	9.53939	7.11951	8.40878	7.81893
pgaptmp_001837	pgaptmp_001837	pgaptmp_001837	protein_coding	protein_coding	pgaptmp_001837	0.4224	438	GO:0006355	GO:0003700		TRUE	-1.53737	4.16663e-06	3.1506e-05	Chromosome_I	1968546	1968983	438	+	8.43978	439.426	516.629	569.331	579.751	482.69	629.222	536.797	440.316	460.962	209.872	226.765	200.08	169.385	186.469	204.205	176.971	210.378	182.572	693.483	554.964	528.377	41.3399	48.7468	54.254	71.3069	56.982	70.3174	58.3537	43.6845
pgaptmp_003278	pgaptmp_003278	pgaptmp_003278	protein_coding	protein_coding	pgaptmp_003278	0.4374	1191	GO:0009966	GO:0009975		TRUE	-1.52916	4.16709e-06	3.1506e-05	Chromosome_II	13844	15034	1191	+	9.17967	532.708	677.69	684.504	1074.94	1028.87	1196.59	1335.68	1064.22	1126.02	288.575	295.702	263.068	251.868	273.044	245.046	578.104	478.011	370.437	881.802	857.614	670.441	18.4304	23.5159	23.9886	48.6225	44.6677	49.1777	53.3978	38.8291
pgaptmp_000331	pgaptmp_000331	alr	protein_coding	protein_coding	pgaptmp_000331	0.481	1077	GO:0006522,GO:0009252	GO:0008784		TRUE	1.54545	4.16958e-06	3.1506e-05	Chromosome_I	349440	350516	1077	+	11.0931	2170.15	1788.4	1836.24	1220.36	1695.9	1054.75	1210.21	1591.11	1577.83	2762.65	3191.04	3327.25	4230.21	4105.65	4218.49	3171.99	3415.31	3553.55	1271.29	1414.49	1883.38	83.0294	68.6262	71.1629	61.0431	81.4195	47.9366	53.5028	64.1979
pgaptmp_003279	pgaptmp_003279	pgaptmp_003279	protein_coding	protein_coding	pgaptmp_003279	0.4504	282				TRUE	-1.74232	4.17086e-06	3.1506e-05	Chromosome_II	15086	15367	282	-	8.58235	275.219	337.965	501.534	580.391	574.175	895.59	886.494	727.64	680.535	215.926	246.721	211.195	173.804	182.03	144.92	365.74	268.964	242.107	701.866	640.343	499.3	40.215	49.5295	74.2322	110.876	105.278	155.451	149.679	112.126
pgaptmp_004375	pgaptmp_004375	modC	protein_coding	protein_coding	pgaptmp_004375	0.4463	1107	GO:0015689	GO:0005524,GO:0015098	GO:0016020	TRUE	-1.20477	4.17246e-06	3.1506e-05	Chromosome_II	1239928	1241034	1107	-	9.99779	1295.15	1364.18	1481.73	1787.94	1783.97	1433.27	1932.62	2261.28	2064.13	597.329	526.095	687.311	568.545	547.199	632.378	562.935	456.707	443.201	1349.53	1461	1509.53	48.2093	50.9291	55.8679	87.01	83.3267	63.3745	83.1248	88.7656
pgaptmp_000137	pgaptmp_000137	coaA	protein_coding	protein_coding	pgaptmp_000137	0.4351	924	GO:0015937	GO:0004594		TRUE	1.13543	4.20243e-06	3.16868e-05	Chromosome_I	143066	143989	924	-	11.1928	2257.26	2125.48	2048.61	1855.2	1840.64	1629.55	1478.23	1551.55	1520.82	2346.94	1899.39	2363.91	4308.27	4617.34	4479.34	3153.45	3141.02	3171.2	2174.33	2130.65	2170	100.663	95.0664	92.5398	108.164	103.001	86.3231	76.1734	72.9679
pgaptmp_002876	pgaptmp_002876	pgaptmp_002876	protein_coding	protein_coding	pgaptmp_002876	0.4715	1629		GO:0016887		TRUE	1.40765	4.22062e-06	3.17784e-05	Chromosome_I	3128243	3129871	1629	-	9.88278	886.561	734.898	717.177	520.815	692.97	445.321	552.388	655.25	709.39	1109.9	1104.8	1115.26	1758.66	1863.58	1854.98	1552.29	1576.5	1981.84	604.074	735.917	843.243	22.4257	18.6444	18.3758	17.2237	21.9957	13.3809	16.1457	17.4793
pgaptmp_000844	pgaptmp_000844	pgaptmp_000844	protein_coding	protein_coding	pgaptmp_000844	0.4675	1587				TRUE	1.37657	4.22825e-06	3.17904e-05	Chromosome_I	891420	893006	1587	-	10.8319	1572.68	1271.77	1332.25	1039.71	1303.33	1056.4	787.005	997.054	1042.27	3246.97	3796.96	3644.05	3020.95	3092.28	3483.35	2898.95	3187.63	3202.96	1190.82	1192.76	1536.95	40.834	33.1187	35.0389	35.2938	42.4641	32.5825	23.612	27.301
pgaptmp_002783	pgaptmp_002783	recJ	protein_coding	protein_coding	pgaptmp_002783	0.4851	1740	GO:0006281,GO:0006310	GO:0008409		TRUE	1.92269	4.28301e-06	3.21562e-05	Chromosome_I	3014707	3016446	1740	-	11.3068	3419.81	2530.34	2450.49	1204.34	1792.85	1059.7	1274.06	1894.85	1857.22	3630.39	3622.8	3512.51	6460.2	5274.42	5782.3	2760.74	3348.74	3975.58	1253.41	1537.46	2120.99	80.9863	60.0995	58.7821	37.2877	53.2768	29.8103	34.8636	47.322
pgaptmp_002521	pgaptmp_002521	pgaptmp_002521	protein_coding	protein_coding	pgaptmp_002521	0.4271	384				TRUE	1.71576	4.32255e-06	3.23842e-05	Chromosome_I	2741667	2742050	384	-	10.6038	1534.91	1227.76	1242.4	766.168	916.906	523.665	749.139	1009.74	974.707	2823.19	2859.06	3045.66	2554.03	3185.52	3234.35	3298.4	2943.96	3103.73	838.774	842.959	1212.94	164.706	132.137	135.043	107.487	123.463	66.7505	92.889	114.266
pgaptmp_003620	pgaptmp_003620	pgaptmp_003620	protein_coding	protein_coding	pgaptmp_003620	0.4572	759				TRUE	1.71387	4.32569e-06	3.23842e-05	Chromosome_II	371032	371790	759	+	6.3495	27.7532	42.2456	22.0544	51.8893	42.3292	54.4281	41.5776	52.2408	39.4105	209.872	183.226	174.144	231.247	187.579	181.809	153.375	159.781	145.529	46.9401	61.1671	68.9549	1.50671	2.30028	1.21282	3.68299	2.88365	3.51006	2.60826	2.99093
pgaptmp_002882	pgaptmp_002882	pgaptmp_002882	protein_coding	protein_coding	pgaptmp_002882	0.4676	819				TRUE	-1.49856	4.36097e-06	3.25293e-05	Chromosome_I	3133893	3134711	819	-	13.0099	10479.2	13296.8	15147.3	8309.97	6959.06	12770.8	13594.4	11572.1	10312.2	4703.97	5426.04	5972.75	3851.67	3081.18	3800.85	9340.68	9087.53	9607.55	11548.9	11039.4	9672.79	527.23	670.973	771.956	546.613	439.35	763.251	790.33	613.996
pgaptmp_000595	pgaptmp_000595	pgaptmp_000595	protein_coding	protein_coding	pgaptmp_000595	0.4529	2844		GO:0046872		TRUE	1.30059	4.3611e-06	3.25293e-05	Chromosome_I	598615	601458	2844	+	11.5176	4203.07	3265.23	3198.71	1820.61	2117.14	1446.47	1967.51	2722.49	2571.54	3688.91	3782.44	3653.31	4399.59	4984.72	4741.52	3370.87	3656.32	3525.77	1872.01	1897.45	2322.86	60.8969	47.4489	46.9447	34.4867	38.4915	24.895	32.9398	41.5982
pgaptmp_004237	pgaptmp_004237	cyoD	protein_coding	protein_coding	pgaptmp_004237	0.4519	312	GO:0015990	GO:0009486	GO:0016020	TRUE	1.60603	4.36361e-06	3.25293e-05	Chromosome_II	1088911	1089222	312	+	12.9099	3479.95	3621.68	4431.31	3825.07	4183.08	5996.99	8273.2	8991.4	7849.03	16073.4	17609.7	16919.7	12359.2	9158.08	9388.18	19655.5	15430.8	18267.8	3537.27	3839.51	3403.71	459.596	479.73	592.814	660.464	693.243	940.831	1262.56	1252.3
pgaptmp_002881	pgaptmp_002881	plsY	protein_coding	protein_coding	pgaptmp_002881	0.482	612	GO:0006654	GO:0008374	GO:0005886	TRUE	-1.54621	4.38686e-06	3.26564e-05	Chromosome_I	3133242	3133853	612	+	12.1127	5650.86	7582.21	8184.65	5580.98	5764.97	8943.53	8419.47	6869.67	6505.55	1921.14	2129.78	2100.84	2330.15	1838.05	2210.69	3773.69	3395.34	3292.92	7161.15	6951.39	5718.27	380.471	512.019	558.199	491.274	487.068	715.304	655.037	487.778
pgaptmp_001165	pgaptmp_001165	pgaptmp_001165	protein_coding	protein_coding	pgaptmp_001165	0.4082	948				TRUE	-1.13451	4.42316e-06	3.28801e-05	Chromosome_I	1236906	1237853	948	-	9.93684	1597.35	1621.18	1678.59	1281.22	1317.67	1123.2	1409.93	1337.37	1510.97	674.013	614.987	578.008	540.559	561.628	569.14	699.456	639.123	654.88	1289.18	1348.86	1295.19	69.4305	70.6746	73.9055	72.8079	71.869	57.9937	70.8143	61.3027
pgaptmp_000531	pgaptmp_000531	pgaptmp_000531	protein_coding	protein_coding	pgaptmp_000531	0.4714	630				TRUE	1.96275	4.44663e-06	3.30079e-05	Chromosome_I	540469	541098	630	-	8.68224	169.603	212.108	211.559	133.247	133.132	178.128	149.976	100.004	109.083	663.923	832.682	791.056	895.532	627.114	677.171	7464.79	5951.83	3521.8	230.789	191.147	156.187	11.0931	13.9142	14.0163	11.3941	10.9266	13.8397	11.3348	6.89785
pgaptmp_002275	pgaptmp_002275	kdsB	protein_coding	protein_coding	pgaptmp_002275	0.4901	759	GO:0009244	GO:0008690		TRUE	1.51418	4.48747e-06	3.325e-05	Chromosome_I	2470064	2470822	759	-	11.0438	2133.14	1892.25	1769.26	1367.7	1706.82	1168.56	1072.85	1571.7	1318.85	3299.44	3996.51	4125.72	3959.19	3302.06	3840.38	2551.75	2682.98	3163.27	1182.44	1288.97	1654.09	115.807	103.034	97.2948	97.0763	116.276	75.3599	67.3024	89.9842
pgaptmp_004847	pgaptmp_004847	hutZ	protein_coding	protein_coding	pgaptmp_004847	0.4294	531	GO:0042167	GO:0020037		TRUE	-1.19314	4.49188e-06	3.325e-05	Chromosome_II	1771840	1772370	531	-	10.9522	969.05	994.532	1253.02	3005.74	2993.77	3678.02	1516.84	1700.81	1582.05	2518.47	2971.53	2676.99	1123.83	1164.32	1032.88	3423.12	2603.09	2189.55	2830.37	2617.44	2664.32	75.1986	77.4044	98.4927	304.944	291.519	339.041	136.012	139.187
pgaptmp_003157	pgaptmp_003157	ftnA	protein_coding	protein_coding	pgaptmp_003157	0.4053	528	GO:0006879	GO:0008199		TRUE	-1.25334	4.52285e-06	3.34301e-05	Chromosome_I	3421289	3421816	528	-	12.1168	5503.62	5843.1	6965.12	5391.36	4974.37	5573.11	6517.29	5576.34	5654.71	2744.48	3327.1	2706.64	2322.78	2497.36	2719.22	3734.93	4066.42	3742.74	6538.64	6588.84	6002.4	429.509	457.352	550.599	550.084	487.133	516.65	587.714	458.936
pgaptmp_000300	pgaptmp_000300	pgaptmp_000300	protein_coding	protein_coding	pgaptmp_000300	0.4703	1161				TRUE	1.61949	4.52958e-06	3.34301e-05	Chromosome_I	312298	313458	1161	+	9.08649	675.328	489.345	557.895	297.242	374.818	251.524	357.122	523.901	546.821	597.329	642.199	653.965	1107.63	1021.14	964.376	706.197	741.649	837.452	274.935	366.365	414.56	23.9685	17.4191	20.0568	13.7925	16.6929	10.6042	14.6459	19.609
pgaptmp_001469	pgaptmp_001469	cobU	protein_coding	protein_coding	pgaptmp_001469	0.51	549	GO:0009236	GO:0000166,GO:0043752		TRUE	2.07936	4.53527e-06	3.34301e-05	Chromosome_I	1520466	1521014	549	+	7.03135	108.7	110.895	113.539	55.7329	83.9757	78.3435	73.5033	86.5705	84.4511	191.71	295.702	257.51	397.687	230.867	255.586	182.027	201.057	227.554	69.2925	60.5299	72.278	8.1586	8.34796	8.63208	5.46895	7.90907	6.98495	6.37481	6.85228
pgaptmp_004578	pgaptmp_004578	pgaptmp_004578	protein_coding	protein_coding	pgaptmp_004578	0.446	648				TRUE	-1.6903	4.59364e-06	3.3813e-05	Chromosome_II	1467909	1468556	648	-	6.54396	134.911	183.064	241.782	176.808	160.441	218.537	358.607	334.341	308.95	28.252	23.5836	27.7889	26.5124	41.0676	28.984	45.5068	49.2657	41.0127	135.232	127.431	131.263	8.57891	11.6754	15.5736	14.6991	12.8022	16.5076	26.3497	22.4209
pgaptmp_002600	pgaptmp_002600	dxs	protein_coding	protein_coding	pgaptmp_002600	0.4893	1866	GO:0008615,GO:0009228,GO:0009240	GO:0008661	GO:0005737	TRUE	1.63272	4.60195e-06	3.38269e-05	Chromosome_I	2808634	2810499	1866	+	12.2068	4963.97	3986.05	3763.96	2439.44	3363.81	1925.6	2488.72	3434.46	3346.38	7058.98	8813	8384.83	9233.7	8568.71	9655.62	6443.42	6849.27	8346.74	2620.82	2874.22	3927.93	109.616	88.2821	84.1926	70.4275	93.2102	50.5112	63.5033	79.9806
pgaptmp_002606	pgaptmp_002606	pgaptmp_002606	protein_coding	protein_coding	pgaptmp_002606	0.4648	654				TRUE	2.32329	4.66823e-06	3.42663e-05	Chromosome_I	2814563	2815216	654	-	10.5949	1692.95	1053.5	1083.12	809.089	888.914	456.042	708.304	1211.99	1145.02	2244.02	1984.65	2163.83	3786.86	4493.02	4384.49	2978.16	3212.92	3474.17	613.015	814.287	1255.31	106.665	66.573	69.1256	66.6473	70.279	34.1318	51.5674	80.53
pgaptmp_005091	pgaptmp_005091	pgaptmp_005091	protein_coding	protein_coding	pgaptmp_005091	0.4468	1587	GO:0009401	GO:0008982	GO:0016020	TRUE	-1.77299	4.70552e-06	3.44919e-05	Chromosome_II	2052599	2054185	1587	-	7.21972	283.7	254.354	249.133	272.899	276.505	183.901	324.454	373.149	385.66	50.4501	65.3084	68.5459	83.9561	59.9366	57.968	70.7883	59.9178	60.8575	229.671	298.19	267.512	7.36614	6.62373	6.55233	9.26381	9.00888	5.67205	9.73439	10.2175
pgaptmp_002711	pgaptmp_002711	pgaptmp_002711	protein_coding	protein_coding	pgaptmp_002711	0.4919	744	GO:0055070	GO:0005507		TRUE	-1.49602	4.71864e-06	3.45399e-05	Chromosome_I	2935414	2936157	744	+	10.0131	1360.68	1533.16	1462.94	1424.07	1410.52	1084.44	1980.13	2415.02	2168.99	474.231	435.389	376.076	506.682	496.142	520.394	709.568	733.66	1508.21	1224.91	1709.49	1687.32	75.36	85.1642	82.0721	103.115	98.0279	71.3452	126.723	141.054
pgaptmp_000871	pgaptmp_000871	pgaptmp_000871	protein_coding	protein_coding	pgaptmp_000871	0.4621	699				TRUE	1.26827	4.74917e-06	3.47151e-05	Chromosome_I	918325	919023	699	-	10.1638	1378.41	950.526	1016.95	695.06	831.564	605.307	700.88	873.915	874.773	1715.3	1736.11	1602.49	1913.31	1965.7	1881.32	1275.87	1605.8	1713.27	793.51	763.314	976.168	81.2567	56.199	60.7247	53.5685	61.5124	42.3868	47.7418	54.3287
pgaptmp_001224	pgaptmp_001224	ribA	protein_coding	protein_coding	pgaptmp_001224	0.4336	648	GO:0009231	GO:0003935,GO:0005525,GO:0046872		TRUE	1.16394	4.75633e-06	3.47193e-05	Chromosome_I	1305899	1306546	648	+	11.3785	1882.59	2228.46	2452.13	2356.8	2245.5	2546.58	2291.22	1903.06	2119.72	3190.46	3022.33	3091.97	5457.15	5296.62	4931.23	1762.97	2680.32	2159.12	2467.15	2476.63	2489.02	119.713	142.125	157.946	195.935	179.177	192.36	168.355	127.619
pgaptmp_000362	pgaptmp_000362	pgaptmp_000362	protein_coding	protein_coding	pgaptmp_000362	0.4172	1419				TRUE	1.36553	4.78432e-06	3.48719e-05	Chromosome_I	390072	391490	1419	+	10.1915	1093.17	924.123	985.098	593.204	654.737	489.028	718.699	796.3	807.212	1701.18	1792.35	1945.22	1633.46	2105.55	2067.09	2447.25	2348.78	2491.19	728.13	798.358	854.874	31.7441	26.9147	28.976	22.5209	23.8577	16.8688	24.1156	24.3855
pgaptmp_000179	pgaptmp_000179	dusB	protein_coding	protein_coding	pgaptmp_000179	0.4757	969	GO:0008033	GO:0017150,GO:0050660		TRUE	1.49574	4.7905e-06	3.48719e-05	Chromosome_I	191805	192773	969	-	14.3229	16643.5	15365.1	13182	12746.8	17099	10466.7	8265.78	10563.8	9974.38	49540	52439	56922.7	45507.1	43600.5	45017.4	20135.9	21971.2	18904.2	17626.5	14460.9	18535.6	707.747	655.319	567.805	708.668	912.409	528.711	406.156	473.735
pgaptmp_000968	pgaptmp_000968	aqpZ	protein_coding	protein_coding	pgaptmp_000968	0.4635	699	GO:0006833	GO:0015250		TRUE	-1.53134	4.81039e-06	3.49253e-05	Chromosome_I	1025925	1026623	699	-	8.39141	298.347	330.924	317.747	483.659	396.666	630.871	495.961	377.627	374.4	326.917	306.587	311.235	263.652	218.657	208.158	161.802	145.134	119.069	773.393	765.226	629.732	17.5874	19.5656	18.9734	37.2758	29.3421	44.177	33.7834	23.4759
pgaptmp_002104	pgaptmp_002104	pgaptmp_002104	protein_coding	protein_coding	pgaptmp_002104	0.437	810		GO:0003824,GO:0016787		TRUE	-1.27891	4.81111e-06	3.49253e-05	Chromosome_I	2283604	2284413	810	+	9.22804	1016.85	1067.58	1111.71	845.603	856.143	769.416	876.842	808.987	784.692	498.447	506.14	494.642	318.149	381.818	370.205	225.848	238.34	227.554	993.564	912.409	893.09	51.7284	54.47	57.2857	56.2401	54.6519	46.4953	51.5429	43.4004
pgaptmp_003304	pgaptmp_003304	agaR	protein_coding	protein_coding	pgaptmp_003304	0.4488	771				TRUE	-1.44906	4.82299e-06	3.49634e-05	Chromosome_II	40313	41083	771	-	8.41876	320.704	470.863	501.534	736.7	718.231	692.722	896.888	851.526	866.328	165.476	154.2	151.912	163.493	172.04	181.809	136.52	158.449	145.529	545.958	561.973	436.991	17.1399	25.2395	27.1511	51.4755	48.1675	43.9782	55.3881	47.9933
pgaptmp_000525	pgaptmp_000525	pgaptmp_000525	protein_coding	protein_coding	pgaptmp_000525	0.4262	237				TRUE	-1.45498	4.83203e-06	3.49807e-05	Chromosome_I	534556	534792	237	-	8.65029	631.386	758.661	722.078	522.096	429.437	786.734	875.357	517.931	596.084	217.944	166.899	205.638	179.695	202.008	179.174	391.021	260.975	321.486	638.161	551.141	490.992	109.775	132.294	127.168	118.677	93.6903	162.485	175.861	94.9644
pgaptmp_000187	pgaptmp_000187	pgaptmp_000187	protein_coding	protein_coding	pgaptmp_000187	0.4945	1191				TRUE	1.77497	4.89426e-06	3.53762e-05	Chromosome_I	201481	202671	1191	+	9.44707	417.069	477.023	502.351	438.817	473.131	529.437	449.929	498.527	414.514	744.643	930.644	1005.96	1748.35	1172.09	1266.07	1260.71	1516.59	1862.77	369.374	456.842	457.761	14.4296	16.5527	17.605	19.8489	20.5406	21.7588	17.9873	18.1892
pgaptmp_000946	pgaptmp_000946	mnmC	protein_coding	protein_coding	pgaptmp_000946	0.4656	2019	GO:0008033	GO:0004808		TRUE	1.18538	4.90419e-06	3.53762e-05	Chromosome_I	993820	995838	2019	-	10.6455	1632.81	1501.48	1408.22	1083.27	1278.07	981.356	868.675	1228.41	1184.43	2449.86	2574.24	2799.26	2540.78	2164.38	2364.83	2241.63	2219.62	2186.9	1109.8	1045.58	1137.34	33.3241	30.7344	29.1121	28.9044	32.7312	23.7916	20.4858	26.4389
pgaptmp_000622	pgaptmp_000622	pgaptmp_000622	protein_coding	protein_coding	pgaptmp_000622	0.4698	1671		GO:0015103	GO:0016020	TRUE	1.28722	4.90683e-06	3.53762e-05	Chromosome_I	628973	630643	1671	+	8.83747	348.457	396.933	423.935	269.056	288.112	348.01	345.243	314.191	311.062	552.933	573.262	494.642	841.034	690.38	855.028	724.737	790.915	742.197	341.433	345.339	336.466	8.59273	9.81707	10.5892	8.67421	8.91515	10.1941	9.83741	8.17062
pgaptmp_000668	pgaptmp_000668	rlmE	protein_coding	protein_coding	pgaptmp_000668	0.419	630	GO:0001510,GO:0006364	GO:0016436		TRUE	1.33155	4.92074e-06	3.53837e-05	Chromosome_I	692104	692733	630	+	12.7679	5791.94	6406.37	6121.33	4458.64	4587.26	4201.69	5723.6	5023.33	5706.79	11391.6	9756.35	10504.2	13901.4	13712.2	13326	6298.47	6768.04	6730.05	6385.52	5280.76	5616.91	378.828	420.255	405.552	381.264	376.493	326.449	432.575	346.488
pgaptmp_003107	pgaptmp_003107	pgaptmp_003107	protein_coding	protein_coding	pgaptmp_003107	0.4882	762				TRUE	1.27567	4.92131e-06	3.53837e-05	Chromosome_I	3364053	3364814	762	-	10.2001	908.147	978.69	1022.67	620.75	744.858	775.188	821.158	906.006	779.062	1707.23	1610.94	1900.76	2160.76	1752.59	1812.82	1687.12	1979.95	2267.6	813.069	846.782	840.751	49.1088	53.0801	56.0173	43.886	50.5431	49.7949	51.3103	51.667
pgaptmp_000397	pgaptmp_000397	pgaptmp_000397	protein_coding	protein_coding	pgaptmp_000397	0.47	3879				TRUE	1.23544	4.94805e-06	3.54708e-05	Chromosome_I	429592	433470	3879	+	12.4997	5376.42	5000.82	4744.15	3455.44	4150.99	3809.14	3992.94	4254.64	4247.19	7147.77	7639.27	8381.12	10443	9538.79	9841.38	7619.85	7545.64	8907.69	4268.75	4305.27	4896.63	57.1125	53.2799	51.0481	47.9897	55.332	48.0663	49.0123	47.6629
pgaptmp_002426	pgaptmp_002426	sucC	protein_coding	protein_coding	pgaptmp_002426	0.473	1167	GO:0006099	GO:0003824,GO:0005524,GO:0046872		TRUE	2.70084	4.94901e-06	3.54708e-05	Chromosome_I	2639566	2640732	1167	-	9.51387	931.275	599.36	552.994	368.35	406.907	215.239	238.329	538.081	467.296	1366.19	1346.08	1402.41	2456.82	2528.44	2121.1	839.347	1041.24	1628.6	269.347	293.73	586.532	32.8825	21.2255	19.7784	17.0041	18.0288	9.0278	9.72385	20.0361
pgaptmp_000250	pgaptmp_000250	pgaptmp_000250	protein_coding	protein_coding	pgaptmp_000250	0.4604	1731				TRUE	1.23556	4.95581e-06	3.54708e-05	Chromosome_I	259918	261648	1731	+	11.8017	3483.8	3487.9	3734.55	2331.82	2498.79	2135.07	2432.29	2687.42	2534.94	4098.57	4203.32	4448.07	5725.22	5470.88	6043.16	5339.46	5559.04	5777.49	2316.27	2622.54	2837.95	82.9305	83.2739	90.0497	72.5707	74.6408	60.3736	66.9038	67.4646
pgaptmp_003734	pgaptmp_003734	pgaptmp_003734	protein_coding	protein_coding	pgaptmp_003734	0.4544	1404				TRUE	-1.69427	4.96039e-06	3.54708e-05	Chromosome_II	492240	493643	1404	+	7.31651	150.33	165.462	164.183	295.961	323.614	266.368	282.876	406.732	325.841	86.7742	96.1484	68.5459	83.9561	67.7061	55.3331	102.812	93.2054	134.945	228.553	279.075	263.358	4.41201	4.87049	4.88092	11.3562	11.918	9.28641	9.59317	12.5886
pgaptmp_002939	pgaptmp_002939	thiP	protein_coding	protein_coding	pgaptmp_002939	0.4619	1587	GO:0015888	GO:0022857		TRUE	1.34851	4.98459e-06	3.55955e-05	Chromosome_I	3197421	3199007	1587	-	10.1355	901.209	771.862	920.568	629.718	827.468	672.93	666.727	674.653	637.606	1567.99	1941.11	1913.73	2131.31	1621.62	1773.29	2332.64	2161.03	2239.82	750.482	751.846	790.904	23.3995	20.1004	24.2114	21.3764	26.9599	20.7551	20.0034	18.4732
pgaptmp_003196	pgaptmp_003196	vmeC	protein_coding	protein_coding	pgaptmp_003196	0.4598	1107				TRUE	1.51843	4.99805e-06	3.56143e-05	Chromosome_I	3464055	3465161	1107	+	12.1195	4331.04	3444.78	3205.24	2242.77	2696.78	1748.3	2315.72	3550.89	3318.23	12822.4	13359.2	13720.3	6907.97	7548.68	6813.87	5914.19	5925.2	5765.59	2289.45	2377.87	3233.4	161.214	128.604	120.852	109.144	125.963	77.3037	99.6029	139.388
pgaptmp_000036	pgaptmp_000036	thiH	protein_coding	protein_coding	pgaptmp_000036	0.4636	1113	GO:0009228	GO:0005506,GO:0016829,GO:0051539,GO:1904047		TRUE	1.28744	5.00075e-06	3.56143e-05	Chromosome_I	38691	39803	1113	+	7.85202	188.876	204.187	192.772	149.262	163.172	176.479	155.916	168.663	168.902	215.926	283.003	240.837	368.228	369.609	376.792	475.293	443.391	460.4	151.438	173.944	143.725	6.99262	7.58184	7.22919	7.22467	7.58045	7.76124	6.67004	6.58511
pgaptmp_005061	pgaptmp_005061	pgaptmp_005061	protein_coding	protein_coding	pgaptmp_005061	0.4856	900				TRUE	1.33147	5.05754e-06	3.597e-05	Chromosome_II	2024461	2025360	900	+	7.07329	83.2597	71.2895	72.6979	109.544	122.891	88.2395	106.914	111.945	103.453	167.494	152.386	146.355	241.558	219.767	205.523	300.008	278.285	292.381	93.3213	80.2818	92.2167	3.81198	3.27359	3.37148	6.55708	7.06029	4.79903	5.65619	5.40503
pgaptmp_000399	pgaptmp_000399	tldD	protein_coding	protein_coding	pgaptmp_000399	0.4959	1446	GO:0006508	GO:0008237		TRUE	1.55117	5.07596e-06	3.6006e-05	Chromosome_I	434343	435788	1446	+	11.8439	3124.55	2422.08	2534.63	1786.02	2438.03	1638.62	1807.88	2305.31	2370.26	5585.83	6345.8	6571.14	6875.56	6872.73	7435.71	6997.93	7360.56	8062.3	2155.89	2347.92	3185.22	89.0384	69.2249	73.1622	66.5398	87.1794	55.4679	59.5299	69.2786
pgaptmp_000002	pgaptmp_000002	dnaN	protein_coding	protein_coding	pgaptmp_000002	0.4623	1101	GO:0006260	GO:0003677,GO:0003887	GO:0009360	TRUE	1.29722	5.07628e-06	3.6006e-05	Chromosome_I	1471	2571	1101	+	12.9773	7561.98	7190.55	7398.85	4410.59	5591.55	4054.07	5809.73	7009.98	6113.56	9385.73	11282	10767.3	14767.4	13981.9	14141.5	10087.3	11385.7	12097.4	5742.89	5891.16	6937.86	283.013	269.909	280.49	215.811	262.597	180.234	251.247	276.673
pgaptmp_003162	pgaptmp_003162	pgaptmp_003162	protein_coding	protein_coding	pgaptmp_003162	0.4827	3126				TRUE	1.11732	5.11281e-06	3.62163e-05	Chromosome_I	3425553	3428678	3126	-	11.249	1901.87	2317.35	2327.15	1659.18	1519.76	1547.08	2114.52	1806.79	1901.56	2407.48	2258.58	2728.87	4421.69	4630.65	4879.85	2733.78	2946.62	3154.01	2290.56	2243.43	2279.66	25.0697	30.6368	31.0725	28.5935	25.1379	24.2246	32.2074	25.1163
pgaptmp_005150	pgaptmp_005150	pgaptmp_005150	protein_coding	protein_coding	pgaptmp_005150	0.4696	675				TRUE	-2.12609	5.14546e-06	3.63986e-05	Chromosome_II	2117717	2118391	675	+	7.38075	277.532	300.12	359.406	315.82	305.18	257.297	507.098	512.707	494.039	82.7381	36.2824	81.514	44.1874	67.7061	54.0156	92.699	55.9232	85.9943	222.406	363.18	279.143	16.9421	18.3752	22.224	25.2058	23.3774	18.6579	35.7702	33.0067
pgaptmp_000251	pgaptmp_000251	mutL	protein_coding	protein_coding	pgaptmp_000251	0.4816	2064	GO:0006298	GO:0005524,GO:0016887,GO:0030983	GO:0032300	TRUE	1.60019	5.16242e-06	3.64696e-05	Chromosome_I	261667	263730	2064	+	11.5551	3158.47	2506.57	2532.18	1627.79	1944.41	1469.56	1560.65	2110.53	2031.75	3775.68	4011.02	4173.89	5828.32	5947.04	6062.92	4921.47	5208.85	6032.83	1699.9	1931.22	2626.1	63.0558	50.1894	51.2065	42.4866	48.7105	34.8506	36.0021	44.4344
pgaptmp_000930	pgaptmp_000930	pgaptmp_000930	protein_coding	protein_coding	pgaptmp_000930	0.4509	1293				TRUE	1.49206	5.23483e-06	3.69315e-05	Chromosome_I	975492	976784	1293	-	9.85377	469.492	505.187	504.801	607.297	611.726	443.672	399.442	409.718	416.626	5016.76	5259.14	5211.34	1397.8	1620.51	1446.56	1307.9	1207.68	1184.08	614.691	590.645	461.914	14.9619	16.1471	16.2953	25.3027	24.4626	16.7956	14.7092	13.7697
pgaptmp_001568	pgaptmp_001568	pgaptmp_001568	protein_coding	protein_coding	pgaptmp_001568	0.4788	777				TRUE	1.44542	5.26227e-06	3.70754e-05	Chromosome_I	1627944	1628720	777	-	7.46134	141.85	187.465	162.549	151.184	131.767	138.544	147.007	163.439	135.122	221.98	190.483	201.932	241.558	325.211	268.761	279.782	258.312	234.169	97.233	109.591	103.017	7.52256	9.97104	8.73183	10.4821	8.76857	8.72771	9.00842	9.14056
pgaptmp_003547	pgaptmp_003547	pgaptmp_003547	protein_coding	protein_coding	pgaptmp_003547	0.464	1278				TRUE	-2.18927	5.28351e-06	3.71753e-05	Chromosome_II	302422	303699	1278	+	9.96919	2254.18	1468.03	951.608	2329.25	2033.85	1494.3	2622.36	3422.52	3273.19	268.394	602.288	437.211	407.997	301.903	288.522	446.64	444.723	754.104	1165.12	1727.97	2057.01	72.6801	47.4731	31.0791	98.1861	82.2872	57.2321	97.6999	116.373
pgaptmp_001697	pgaptmp_001697	ccoN	protein_coding	protein_coding	pgaptmp_001697	0.4517	1428		GO:0004129		TRUE	1.24034	5.3646e-06	3.76805e-05	Chromosome_I	1794500	1795927	1428	+	12.448	4657.14	4413.79	4378.21	3112.08	4404.97	3406.71	3855.58	4569.58	3963.57	10174.8	11418.1	10076.2	7640	7974.89	7393.55	8681.68	7806.62	11470.3	3536.15	3079.38	3738.52	134.385	127.739	127.97	117.405	159.499	116.772	128.557	139.055
pgaptmp_004223	pgaptmp_004223	pgaptmp_004223	protein_coding	protein_coding	pgaptmp_004223	0.4894	846				TRUE	1.45844	5.36963e-06	3.76805e-05	Chromosome_II	1072408	1073253	846	-	6.45932	56.2774	58.9678	45.7425	73.0294	83.9757	40.4088	29.6983	73.1372	59.8196	179.602	136.059	157.47	145.818	182.03	193.666	99.4407	142.471	162.728	66.4984	59.8928	58.1547	2.74108	2.88062	2.25679	4.65041	5.13248	2.33796	1.67145	3.75669
pgaptmp_003071	pgaptmp_003071	pgaptmp_003071	protein_coding	protein_coding	pgaptmp_003071	0.4752	867		GO:0016788		TRUE	-1.52243	5.38113e-06	3.77109e-05	Chromosome_I	3321746	3322612	867	+	13.1339	11049.6	13262.5	16217.4	12270.2	9670.86	13254.1	17055	13498.3	13315.8	4362.92	4854.59	4939.01	3968.03	4671.72	4979.98	7439.51	7499.04	6564.67	15856.2	13278.4	12457.6	525.154	632.19	780.732	762.425	576.753	748.278	936.623	676.546
pgaptmp_001203	pgaptmp_001203	pgaptmp_001203	protein_coding	protein_coding	pgaptmp_001203	0.4758	2892				TRUE	1.53765	5.48176e-06	3.8365e-05	Chromosome_I	1280068	1282959	2892	+	11.6743	3593.27	2361.35	2619.58	1345.92	1667.91	1228.76	1394.33	2170.98	2197.84	6895.52	8448.36	8225.5	4844.41	5083.51	5346.23	6571.51	7098.26	8428.76	1600.99	1655.33	2336.16	51.1976	33.7446	37.8071	25.0718	29.8207	20.797	22.9563	32.6208
pgaptmp_004315	pgaptmp_004315	pgaptmp_004315	protein_coding	protein_coding	pgaptmp_004315	0.4648	1635				TRUE	-1.96105	5.555e-06	3.87864e-05	Chromosome_II	1170983	1172617	1635	-	8.24007	1262.77	940.845	762.92	670.077	596.705	334.815	1026.82	973.919	1138.68	98.8822	79.8213	90.777	69.2269	112.104	100.126	92.699	141.14	157.436	329.698	429.444	491.823	31.8248	23.7816	19.4761	22.0786	18.8706	10.0235	29.9026	25.8847
pgaptmp_004182	pgaptmp_004182	pgaptmp_004182	protein_coding	protein_coding	pgaptmp_004182	0.4373	1221				TRUE	-1.86552	5.55671e-06	3.87864e-05	Chromosome_II	1022005	1023225	1221	-	7.62037	319.162	334.444	337.351	442.02	376.867	324.095	481.112	453.003	479.964	125.116	47.1672	85.2192	51.552	92.1247	85.6345	116.295	101.194	79.3793	300.64	316.667	348.097	10.7709	11.3201	11.5321	19.5025	15.9594	12.9924	18.7613	16.1221
pgaptmp_002103	pgaptmp_002103	pgaptmp_002103	protein_coding	protein_coding	pgaptmp_002103	0.4744	957	GO:0055085			TRUE	-1.35183	5.56717e-06	3.8808e-05	Chromosome_I	2282560	2283516	957	+	8.32128	561.232	599.36	622.425	458.035	435.581	444.496	714.986	671.668	682.647	149.332	134.245	170.438	154.656	144.292	177.856	180.342	170.433	168.02	414.078	490.611	428.683	24.1651	25.8832	27.1466	25.784	23.5343	22.7347	35.5728	30.4986
pgaptmp_005044	pgaptmp_005044	pgaptmp_005044	protein_coding	protein_coding	pgaptmp_005044	0.4478	498				TRUE	-2.4274	5.58297e-06	3.88666e-05	Chromosome_II	2005371	2005868	498	+	8.18556	186.563	183.064	169.901	638.046	558.473	560.775	279.164	253.741	274.466	258.304	330.17	203.785	92.7936	174.26	165.999	256.186	179.753	170.666	1086.89	697.687	815.827	15.4367	15.192	14.2399	69.0219	57.9851	55.1178	26.6909	22.1411
pgaptmp_003646	pgaptmp_003646	pgaptmp_003646	protein_coding	protein_coding	pgaptmp_003646	0.4595	1086				TRUE	-1.36373	5.65661e-06	3.92966e-05	Chromosome_II	402313	403398	1086	-	9.21094	457.928	492.865	489.282	1163.99	1080.76	907.96	964.452	1020.94	1069.01	256.286	272.118	277.889	313.731	388.478	429.49	480.349	464.696	472.307	1014.24	1080.62	1043.46	17.375	18.756	18.8049	57.7407	51.4569	40.9232	42.2847	40.8513
pgaptmp_002627	pgaptmp_002627	pgaptmp_002627	protein_coding	protein_coding	pgaptmp_002627	0.4514	627				TRUE	1.69014	5.66552e-06	3.92966e-05	Chromosome_I	2842312	2842938	627	-	5.50881	30.8369	43.1257	25.3218	34.5929	33.4537	15.6687	31.1832	23.1352	28.1504	64.5761	68.9366	61.1355	83.9561	84.3552	122.523	94.3844	111.846	74.0874	27.9405	24.212	24.9234	2.02657	2.84257	1.68565	2.97224	2.75881	1.2232	2.36802	1.60341
pgaptmp_000037	pgaptmp_000037	pgaptmp_000037	protein_coding	protein_coding	pgaptmp_000037	0.4919	1791	GO:0006508	GO:0004177,GO:0046872,GO:0070006	GO:0016020	TRUE	1.72533	5.66714e-06	3.92966e-05	Chromosome_I	39931	41721	1791	-	11.629	3311.11	3004.72	2498.69	1688	1774.41	1041.56	1513.13	2612.79	2443.45	4580.87	4753	4733.37	5685.45	7080.28	7338.22	5095.07	4942.55	5933.61	1882.63	1852.22	2728.29	76.1792	69.3346	58.2314	50.7741	51.2275	28.4656	40.2266	63.3937
pgaptmp_004268	pgaptmp_004268	gcvP	protein_coding	protein_coding	pgaptmp_004268	0.503	2865	GO:0019464	GO:0004375		TRUE	1.42978	5.69567e-06	3.94425e-05	Chromosome_II	1115667	1118531	2865	-	8.63816	313.766	256.994	263.02	297.242	331.124	263.069	248.723	396.284	332.878	413.691	783.701	387.192	651.028	633.774	642.917	573.048	593.852	1259.49	259.847	199.43	286.62	4.51272	3.70715	3.83181	5.58921	5.97599	4.49447	4.13356	6.01062
pgaptmp_002214	pgaptmp_002214	cydA	protein_coding	protein_coding	pgaptmp_002214	0.4638	1587	GO:0019646	GO:0009055	GO:0070069	TRUE	1.42636	5.70447e-06	3.94516e-05	Chromosome_I	2395236	2396822	1587	-	15.0592	30789.1	27564.4	25853.5	18853.8	23703	17447.5	19453.9	27047.3	23916.6	66767.7	76991.3	75478.3	63283.7	59165.2	61165.4	37608.8	39216.8	39638.1	24019.9	22043.1	26663.1	799.426	717.816	679.96	640.007	772.272	538.133	583.662	740.602
pgaptmp_002907	pgaptmp_002907	pgaptmp_002907	protein_coding	protein_coding	pgaptmp_002907	0.4626	1725				TRUE	1.85807	5.7176e-06	3.94905e-05	Chromosome_I	3161698	3163422	1725	-	11.7402	2318.16	1736.47	1792.94	2401	3494.89	1623.77	2427.09	4708.39	4330.94	4027.94	3907.62	3845.98	7295.34	7963.79	7792.74	4107.41	4720.19	5983.88	1623.34	2286.12	2852.9	55.375	41.6026	43.3829	74.9838	104.758	46.0754	66.9931	118.61
pgaptmp_002035	pgaptmp_002035	hisH	protein_coding	protein_coding	pgaptmp_002035	0.4618	615	GO:0000105	GO:0000107		TRUE	2.45365	5.75623e-06	3.96714e-05	Chromosome_I	2200098	2200712	615	-	7.9241	329.955	209.468	194.406	121.716	156.345	78.3435	92.8072	267.175	188.608	349.115	397.293	418.686	617.151	630.444	565.188	411.246	448.717	436.586	69.8513	101.308	162.833	22.1074	14.0761	13.194	10.6619	13.1448	6.23535	7.1852	18.8781
pgaptmp_000087	pgaptmp_000087	pgaptmp_000087	protein_coding	protein_coding	pgaptmp_000087	0.4583	336	GO:0006355	GO:0003700		TRUE	1.54361	5.75887e-06	3.96714e-05	Chromosome_I	95160	95495	336	+	5.78304	105.616	81.8509	82.4999	29.468	34.1365	18.1427	30.4407	29.8519	40.8181	42.3781	56.2378	35.1992	106.05	118.763	119.888	87.6426	91.8739	101.87	29.0581	41.4152	38.2159	12.9524	10.0676	10.2484	4.72471	5.25319	2.64299	4.31369	3.86074
pgaptmp_003743	pgaptmp_003743	pgaptmp_003743	protein_coding	protein_coding	pgaptmp_003743	0.4484	765				TRUE	-2.07957	5.76945e-06	3.96923e-05	Chromosome_II	500069	500833	765	-	8.45905	346.144	405.734	406.782	746.309	616.505	769.416	689	641.816	651.681	135.206	181.412	194.522	97.2123	154.281	193.666	193.825	207.715	254.014	753.835	646.078	688.718	18.6446	21.919	22.1943	52.5559	41.6696	49.2303	42.8836	36.4575
pgaptmp_000892	pgaptmp_000892	fliE	protein_coding	protein_coding	pgaptmp_000892	0.4647	312	GO:0071973	GO:0003774	GO:0009431	TRUE	1.11935	5.95724e-06	4.09308e-05	Chromosome_I	939930	940241	312	+	10.4104	1205.72	1158.23	1286.51	906.461	860.239	1124.02	960.74	941.082	909.257	1917.1	1614.57	1858.15	1770.44	1796.99	1857.61	3227.61	2548.5	2586.44	935.448	860.8	843.243	159.24	153.42	172.107	156.516	142.564	176.341	146.617	131.072
pgaptmp_004144	pgaptmp_004144	tssH	protein_coding	protein_coding	pgaptmp_004144	0.4677	2679	GO:0033103	GO:0016887	GO:0033104	TRUE	-2.01955	5.97616e-06	4.09726e-05	Chromosome_II	977199	979877	2679	-	7.68764	246.695	286.918	321.015	454.832	404.859	440.373	539.766	434.345	458.851	70.6301	76.1931	94.4821	57.4436	115.433	89.5869	124.722	86.5479	79.3793	415.755	407.144	397.944	3.79443	4.42616	5.00142	9.14624	7.81402	8.04601	9.59325	7.04531
pgaptmp_000363	pgaptmp_000363	pgaptmp_000363	protein_coding	protein_coding	pgaptmp_000363	0.4309	1497				TRUE	1.30377	5.98018e-06	4.09726e-05	Chromosome_I	391554	393050	1497	+	9.76957	991.407	780.664	863.39	466.363	579.637	408.211	617.724	632.114	650.274	1015.06	1064.89	1167.13	1356.55	1602.75	1619.15	1272.5	1303.54	1480.42	576.133	646.078	736.903	27.289	21.5518	24.0728	16.7829	20.0207	13.3474	19.6474	18.349
pgaptmp_000883	pgaptmp_000883	pgaptmp_000883	protein_coding	protein_coding	pgaptmp_000883	0.4674	1134				TRUE	-1.35259	5.98669e-06	4.09726e-05	Chromosome_I	929298	930431	1134	+	12.5353	9194.02	9086.33	9526.7	8441.3	8034.36	5222.63	8219	11702.7	10578.9	6025.76	5647.36	6122.81	2287.43	2759.3	2587.48	4345.05	3792.13	3311.44	5985.97	7124.06	7685.56	334.08	331.144	350.647	401.015	366.338	225.428	345.095	448.446
pgaptmp_000117	pgaptmp_000117	pgaptmp_000117	protein_coding	protein_coding	pgaptmp_000117	0.4488	1854				TRUE	1.53084	6.00962e-06	4.10762e-05	Chromosome_I	122865	124718	1854	+	11.5608	2066.07	2008.43	2093.54	1939.12	2074.81	1586.66	1796	1882.91	1903.67	4221.66	4350.26	4957.53	5638.31	5193.39	5711.16	5664.75	6801.33	7182.51	1652.96	1931.22	2502.31	45.9192	44.7701	47.1316	56.3456	57.8647	41.8897	46.1244	44.1324
pgaptmp_002561	pgaptmp_002561	rsfS	protein_coding	protein_coding	pgaptmp_002561	0.4528	318	GO:0017148	GO:0043022		TRUE	1.20902	6.02499e-06	4.11047e-05	Chromosome_I	2764883	2765200	318	+	10.2449	918.169	917.082	928.737	816.135	985.179	893.941	631.831	688.833	611.567	2235.95	2505.3	2671.44	2358.13	2013.42	2329.26	1193.29	1427.37	1271.39	951.654	993.965	1124.88	118.974	119.185	121.901	138.261	160.189	137.599	94.6034	94.1292
pgaptmp_000795	pgaptmp_000795	pgaptmp_000795	protein_coding	protein_coding	pgaptmp_000795	0.4328	744				TRUE	-1.62903	6.02942e-06	4.11047e-05	Chromosome_I	840584	841327	744	+	10.9506	1752.31	2234.62	2532.18	3171.01	2825.82	4350.95	2833.22	2327.7	2489.2	1216.86	1228.16	1280.14	1157.71	1044.45	1113.25	1358.46	1387.43	1160.26	4460.42	3506.91	2971.71	97.05	124.129	142.057	229.609	196.388	286.249	181.317	135.954
pgaptmp_004652	pgaptmp_004652	modF	protein_coding	protein_coding	pgaptmp_004652	0.4375	1449		GO:0005524		TRUE	-1.13825	6.11047e-06	4.16034e-05	Chromosome_II	1562610	1564058	1449	+	8.66122	615.196	598.479	564.43	784.105	673.854	584.69	893.919	967.202	934.593	215.926	212.252	183.407	209.154	205.338	208.158	239.332	207.715	224.908	473.871	480.417	536.685	17.4946	17.0696	16.2586	29.1521	24.0459	19.751	29.3739	29.0059
pgaptmp_000565	pgaptmp_000565	ftsB	protein_coding	protein_coding	pgaptmp_000565	0.4255	282				TRUE	1.14796	6.14145e-06	4.17192e-05	Chromosome_I	576192	576473	282	+	10.0896	934.358	1061.42	1085.57	705.951	709.356	931.876	859.023	877.646	783.284	1315.74	1262.63	1558.03	1782.23	1569.45	1670.53	1572.51	1442.02	1436.77	832.068	746.748	817.489	136.528	155.554	160.675	134.862	130.065	161.749	145.04	135.241
pgaptmp_000916	pgaptmp_000916	pgaptmp_000916	protein_coding	protein_coding	pgaptmp_000916	0.4692	780		GO:0005524		TRUE	2.03742	6.14567e-06	4.17192e-05	Chromosome_I	964233	965012	780	+	11.0562	2703.63	1781.36	1698.19	1019.21	1397.55	780.137	884.267	1873.21	1615.13	3533.52	3876.78	4157.21	5025.58	3962.47	4089.38	3256.26	3734.87	4305.01	862.244	993.965	1527.81	142.827	94.3839	90.8726	70.3935	92.6437	48.9563	53.9786	104.359
pgaptmp_001683	pgaptmp_001683	pgaptmp_001683	protein_coding	protein_coding	pgaptmp_001683	0.4246	252				TRUE	2.17143	6.15126e-06	4.17192e-05	Chromosome_I	1780451	1780702	252	+	9.31506	807.927	505.187	504.801	260.087	365.26	155.038	249.466	523.901	425.071	1327.85	1188.25	1402.41	1047.24	1559.46	1375.42	1715.77	1272.92	1509.53	254.259	249.129	421.206	132.108	82.8502	83.6105	55.601	74.9455	30.1141	47.1349	90.3413
pgaptmp_003036	pgaptmp_003036	pgaptmp_003036	protein_coding	protein_coding	pgaptmp_003036	0.4543	2199				TRUE	1.55292	6.19717e-06	4.19764e-05	Chromosome_I	3287230	3289428	2199	+	13.0983	9578.72	7686.06	7900.39	4852.61	6204.64	4037.58	5143.74	6418.16	6626.6	13544.8	12085.7	11930.7	16375.9	17196.2	15847.7	13992.5	13367	12203.3	5036	5562.38	7344.94	179.49	144.451	149.956	118.882	145.893	89.8728	111.375	126.83
pgaptmp_005001	pgaptmp_005001	pgaptmp_005001	protein_coding	protein_coding	pgaptmp_005001	0.3961	669	GO:0006355			TRUE	-1.67965	6.22361e-06	4.21014e-05	Chromosome_II	1954239	1954907	669	-	8.61602	366.188	396.933	490.915	984.615	862.97	770.24	634.801	507.483	605.937	294.629	234.022	201.932	181.168	247.516	229.237	205.623	177.09	132.299	908.067	735.917	654.656	22.5547	24.5207	30.6282	79.2875	66.6981	56.3551	45.1798	32.9634
pgaptmp_000008	pgaptmp_000008	glyS	protein_coding	protein_coding	pgaptmp_000008	0.4794	2067	GO:0006426	GO:0000166,GO:0004820,GO:0005524	GO:0005737	TRUE	2.02812	6.23466e-06	4.2122e-05	Chromosome_I	11034	13100	2067	-	12.9156	8551.08	5550.02	5179.52	3531.03	4307.34	2342.88	3401.94	5793.51	5454.84	14900.9	16831.4	16940.1	15246.1	19746.9	18479.9	13672.3	12658.6	12376.6	3973.14	3733.1	6264.92	170.466	110.967	104.59	92.0292	107.749	55.4808	78.3644	121.798
pgaptmp_003612	pgaptmp_003612	pgaptmp_003612	protein_coding	protein_coding	pgaptmp_003612	0.4863	876	GO:0030001,GO:0055085		GO:0043190	TRUE	1.65309	6.25417e-06	4.2195e-05	Chromosome_II	360812	361687	876	+	6.18475	38.5461	40.4854	42.4752	55.7329	40.281	49.4801	50.4871	67.1668	59.1158	78.7021	85.2637	90.777	188.533	137.632	173.904	129.779	121.167	113.777	43.5872	46.5125	61.4778	1.81316	1.91001	2.02382	3.42746	2.37761	2.76477	2.74416	3.33187
pgaptmp_000908	pgaptmp_000908	flhA	protein_coding	protein_coding	pgaptmp_000908	0.4752	2100	GO:0044780		GO:0016020	TRUE	1.20442	6.2615e-06	4.2195e-05	Chromosome_I	954286	956385	2100	+	11.4823	2917.17	2701.96	2893.21	1650.21	2022.93	2069.92	2194.7	2405.32	2225.99	4009.77	4587.91	4572.19	4853.25	3983.56	4422.69	2691.64	3419.31	3709.66	1948.57	2038.9	2120.15	57.2402	53.1742	57.5046	42.3334	49.8087	48.2466	49.761	49.7726
pgaptmp_003293	pgaptmp_003293	pgaptmp_003293	protein_coding	protein_coding	pgaptmp_003293	0.4608	1992				TRUE	-1.81903	6.3303e-06	4.2604e-05	Chromosome_II	29384	31375	1992	+	8.39581	527.311	474.383	418.217	1112.1	1144.25	499.749	527.145	579.873	643.94	139.242	123.36	188.964	162.021	168.71	138.333	146.633	150.46	144.206	478.9	565.796	791.735	10.9078	9.84196	8.76302	30.0758	29.7014	12.2799	12.6001	12.6497
pgaptmp_000526	pgaptmp_000526	epd	protein_coding	protein_coding	pgaptmp_000526	0.4499	1038	GO:0042823	GO:0048001,GO:0051287		TRUE	-1.7209	6.34902e-06	4.26754e-05	Chromosome_I	534992	536029	1038	+	13.6505	26185.9	26331.3	22639.3	19829.4	17629.4	11354	17531.6	20466.5	20323.2	6873.32	6929.94	7176.94	5772.35	7447.67	6887.65	7673.79	6593.62	6751.21	19470.1	22264.2	28970.2	1039.51	1048.38	910.346	1029.14	878.183	535.409	804.189	856.807
pgaptmp_002863	pgaptmp_002863	cpdA	protein_coding	protein_coding	pgaptmp_002863	0.4597	807		GO:0004115		TRUE	1.5691	6.36414e-06	4.27225e-05	Chromosome_I	3112443	3113249	807	-	11.9671	3852.3	3083.93	3363.71	2795.62	2502.89	1992.4	2444.91	2682.19	2904.42	4377.05	4001.95	3866.36	6592.76	9132.56	9234.03	7008.04	7111.57	8598.11	2658.82	2930.29	3343.9	196.7	157.933	173.975	186.624	160.366	120.847	144.252	144.429
pgaptmp_002972	pgaptmp_002972	rpoA	protein_coding	protein_coding	pgaptmp_002972	0.4602	993	GO:0006351	GO:0003677,GO:0003899,GO:0046983		TRUE	2.127	6.37244e-06	4.27238e-05	Chromosome_I	3232200	3233192	993	-	17.5169	213442	158459	128298	83990.2	104822	50935.7	68621.6	138616	126768	512571	460517	543647	429241	428922	426283	296920	274915	265173	88969.3	85937.9	138929	8857.06	6594.91	5392.77	4556.63	5458.18	2510.76	3290.37	6065.98
pgaptmp_003231	pgaptmp_003231	pgaptmp_003231	protein_coding	protein_coding	pgaptmp_003231	0.4428	603		GO:0015035		TRUE	-1.86244	6.41158e-06	4.29315e-05	Chromosome_I	3498216	3498818	603	+	11.3797	3808.36	3864.59	4767.02	3891.06	3241.6	3703.59	4295.86	3430.73	3637.03	2141.1	2131.59	1982.27	926.463	1490.64	1418.9	1250.59	1347.48	1360.03	5687.57	4570.97	4629.11	260.243	264.867	329.967	347.628	277.962	300.634	339.207	247.233
pgaptmp_002190	pgaptmp_002190	pgaptmp_002190	protein_coding	protein_coding	pgaptmp_002190	0.448	1020				TRUE	-1.49616	6.44216e-06	4.30814e-05	Chromosome_I	2371009	2372028	1020	+	6.23617	141.85	165.462	165.817	149.262	93.5339	117.103	128.445	87.3168	103.453	46.4141	41.7248	24.0837	33.877	39.9577	30.3014	48.8776	49.2657	31.7517	129.644	119.786	112.155	5.73042	6.70409	6.7853	7.88338	4.74147	5.61954	5.99584	3.71993
pgaptmp_002714	pgaptmp_002714	pgaptmp_002714	protein_coding	protein_coding	pgaptmp_002714	0.4898	639				TRUE	1.23705	6.52694e-06	4.3593e-05	Chromosome_I	2938081	2938719	639	+	7.50305	201.211	179.544	184.604	129.403	159.759	93.1876	93.5496	94.7798	128.788	207.854	224.951	226.016	309.312	295.243	276.665	316.862	339.534	275.182	138.026	118.511	125.448	12.975	11.6121	12.0581	10.9096	12.9273	7.13822	6.97066	6.44544
pgaptmp_003159	pgaptmp_003159	pgaptmp_003159	protein_coding	protein_coding	pgaptmp_003159	0.4767	879			GO:0016020	TRUE	-1.21362	6.54789e-06	4.36775e-05	Chromosome_I	3422647	3423525	879	+	11.4803	3452.96	4119.83	4896.08	3580.36	3864.93	5270.46	4436.92	4070.31	3489.94	1206.77	1367.85	1222.71	1726.25	1517.28	1749.58	2587.14	2637.71	2660.53	4283.84	4251.75	3800.83	161.868	193.701	232.488	219.433	227.351	293.489	240.34	201.222
pgaptmp_000274	pgaptmp_000274	crp	protein_coding	protein_coding	pgaptmp_000274	0.4471	633	GO:0006355	GO:0003700		TRUE	-1.61906	6.58538e-06	4.38477e-05	Chromosome_I	290092	290724	633	-	14.2772	25174.5	32449	35751.9	33476.9	27062	39796.9	35306.1	28554.8	28000.5	10213.1	11087.9	9461.18	9211.6	9967.23	9115.46	13406	13064.7	13584.5	37177.1	28073.8	27144.1	1638.76	2118.55	2357.41	2849.09	2210.55	3077.36	2655.7	1960.26
pgaptmp_002157	pgaptmp_002157	sctW	protein_coding	protein_coding	pgaptmp_002157	0.4441	894	GO:0030254,GO:0050709		GO:0009986	TRUE	-1.42519	6.59007e-06	4.38477e-05	Chromosome_I	2340585	2341478	894	-	9.80118	1413.87	1250.65	1286.51	621.39	672.488	732.306	1082.5	1401.55	1313.92	748.679	1070.33	1231.97	469.859	386.258	451.887	709.568	809.556	702.507	1090.8	1201.04	1494.58	65.1675	57.8147	60.0643	37.4448	38.8948	40.0948	57.6533	68.1252
pgaptmp_003199	pgaptmp_003199	ilvC	protein_coding	protein_coding	pgaptmp_003199	0.4653	1485	GO:0009082	GO:0004455		TRUE	-1.5019	6.61361e-06	4.39488e-05	Chromosome_I	3469070	3470554	1485	-	11.9407	10769.8	9614.4	8540.78	5274.13	5809.34	3475.98	6962.76	10007.1	9480.34	1622.47	1814.12	1750.7	1991.38	1768.13	1852.34	2014.1	2114.43	1952.73	4485.01	5853.56	6645.42	298.84	267.57	240.056	191.332	202.276	114.573	223.248	292.833
pgaptmp_001838	pgaptmp_001838	pgaptmp_001838	protein_coding	protein_coding	pgaptmp_001838	0.4101	573				TRUE	-1.49487	6.63518e-06	4.40082e-05	Chromosome_I	1969075	1969647	573	-	8.76018	654.513	805.307	870.742	687.373	619.918	739.728	807.794	653.011	729.095	310.773	235.836	227.869	223.883	217.548	233.189	165.173	222.361	183.895	795.187	704.696	564.931	47.0676	58.0829	63.4272	64.6252	55.9402	63.1902	67.1241	49.5226
pgaptmp_005291	pgaptmp_005291	pgaptmp_005291	protein_coding	protein_coding	pgaptmp_005291	0.4378	651				TRUE	-1.4006	6.64623e-06	4.40082e-05	Chromosome_II	2278615	2279265	651	+	7.88001	292.18	286.918	280.173	367.709	329.758	283.686	391.275	448.525	434.22	143.278	132.431	146.355	145.818	143.182	122.523	131.464	146.466	111.131	346.462	444.099	409.575	18.4938	18.2146	17.9633	30.429	26.1914	21.3299	28.6176	29.9394
pgaptmp_000017	pgaptmp_000017	fadB	protein_coding	protein_coding	pgaptmp_000017	0.4715	2172	GO:0009062	GO:0003857,GO:0004165,GO:0004300,GO:0008692	GO:0036125	TRUE	1.36305	6.65476e-06	4.40082e-05	Chromosome_I	19717	21888	2172	-	9.30582	518.831	485.825	472.128	348.491	374.818	374.4	426.913	515.692	416.626	1047.34	1144.71	1013.37	992.744	1205.39	1164.63	972.496	876.131	891.695	404.579	518.646	450.284	9.84293	9.24403	9.07279	8.64363	8.92288	8.43739	9.35863	10.3173
pgaptmp_003772	pgaptmp_003772	pgaptmp_003772	protein_coding	protein_coding	pgaptmp_003772	0.4882	1020				TRUE	1.84117	6.656e-06	4.40082e-05	Chromosome_II	526435	527454	1020	+	4.76858	24.6695	28.1637	24.5049	12.1716	17.0682	8.24669	11.1369	18.6574	17.594	24.216	43.5389	50.02	55.9707	58.8266	72.46	40.4505	63.9123	88.6403	8.38215	12.106	16.6156	0.996595	1.14112	1.00275	0.642851	0.865232	0.395742	0.519871	0.794858
pgaptmp_000882	pgaptmp_000882	pgaptmp_000882	protein_coding	protein_coding	pgaptmp_000882	0.4621	1134				TRUE	-1.52469	6.6839e-06	4.41372e-05	Chromosome_I	927901	929034	1134	+	10.417	2225.65	2183.57	2129.48	1980.12	2174.49	1415.96	2251.87	2570.25	2504.68	1105.87	1389.62	1130.08	506.682	614.905	550.696	763.502	833.523	813.638	1388.64	1732.43	2059.51	80.8729	79.5785	78.3792	94.0682	99.1491	61.118	94.5504	98.4917
pgaptmp_004930	pgaptmp_004930	pgaptmp_004930	protein_coding	protein_coding	pgaptmp_004930	0.4764	1335		GO:0016812		TRUE	1.37782	6.71974e-06	4.43183e-05	Chromosome_II	1861476	1862810	1335	-	5.44532	24.6695	26.4035	19.6039	34.5929	33.4537	40.4088	29.6983	38.8075	33.7805	78.7021	50.7954	59.2829	95.7394	119.873	102.761	33.7087	34.6192	37.0437	37.9991	35.6808	40.7083	0.761444	0.817376	0.612919	1.39595	1.29571	1.48159	1.05921	1.2632
pgaptmp_003801	pgaptmp_003801	pgaptmp_003801	protein_coding	protein_coding	pgaptmp_003801	0.4375	720				TRUE	-1.21804	6.7593e-06	4.45085e-05	Chromosome_II	556941	557660	720	+	7.46963	279.845	258.754	195.223	231.9	246.465	196.271	218.282	242.547	262.502	123.098	148.758	118.566	100.158	98.7843	94.8567	117.98	151.792	111.131	231.906	261.872	269.173	16.0156	14.8524	11.3172	17.3513	17.6998	13.3431	14.4351	14.6386
pgaptmp_001687	pgaptmp_001687	fabA	protein_coding	protein_coding	pgaptmp_001687	0.4528	519	GO:0006633			TRUE	-2.24725	6.76549e-06	4.45085e-05	Chromosome_I	1784896	1785414	519	-	14.4052	34801	46295.9	49761.3	29958.1	27374	67181.6	42882.8	35135.7	30887.3	6096.39	7748.11	8507.1	9353	5761.68	8102.34	18137	19791.5	15764.7	48007.4	37969.5	31116.1	2763.01	3686.52	4001.89	3109.64	2727.19	6336.01	3934.13	2941.84
pgaptmp_005236	pgaptmp_005236	iolG	protein_coding	protein_coding	pgaptmp_005236	0.4975	987	GO:0019310	GO:0050112		TRUE	1.35485	6.82748e-06	4.48602e-05	Chromosome_II	2214010	2214996	987	-	6.28502	41.6298	27.2836	34.3069	46.1238	63.4938	42.8828	36.3804	54.4797	64.0421	133.188	157.829	146.355	159.075	133.192	133.063	163.487	157.118	183.895	49.1753	53.5212	58.1547	1.73798	1.14242	1.45079	2.51752	3.32628	2.12666	1.75502	2.39859
pgaptmp_000201	pgaptmp_000201	pgaptmp_000201	protein_coding	protein_coding	pgaptmp_000201	0.4844	609		GO:0004784,GO:0046872		TRUE	-1.41802	6.84072e-06	4.48912e-05	Chromosome_I	219253	219861	609	-	9.72658	799.447	934.684	1244.85	1254.31	877.307	987.953	871.645	801.524	643.236	639.707	741.976	529.841	456.603	647.093	624.473	635.409	696.378	711.768	1621.67	1657.88	1677.35	54.0917	63.4292	85.318	110.956	74.4866	79.4057	68.1483	57.1922
pgaptmp_004256	pgaptmp_004256	pgaptmp_004256	protein_coding	protein_coding	pgaptmp_004256	0.4362	894	GO:0006355	GO:0003677,GO:0003700		TRUE	-1.21487	6.85567e-06	4.49332e-05	Chromosome_II	1105067	1105960	894	-	7.9689	326.1	363.488	318.564	520.815	544.135	418.107	557.585	511.214	487.002	145.296	90.7061	138.944	145.818	156.501	133.063	124.722	90.5424	108.485	349.815	380.383	381.329	15.0304	16.8033	14.8731	31.3841	31.4712	22.8919	29.6966	24.8486
pgaptmp_002460	pgaptmp_002460	pgaptmp_002460	protein_coding	protein_coding	pgaptmp_002460	0.4714	210				TRUE	-1.42956	6.91284e-06	4.52516e-05	Chromosome_I	2677968	2678177	210	-	8.82452	1065.42	1224.24	1494.8	698.904	643.131	949.194	1278.51	1117.95	1103.49	183.638	181.412	194.522	220.937	192.019	183.126	176.971	182.416	137.591	614.691	631.423	502.623	209.054	240.929	297.102	179.293	158.352	221.242	289.88	231.335
pgaptmp_004390	pgaptmp_004390	pgaptmp_004390	protein_coding	protein_coding	pgaptmp_004390	0.449	294	GO:0006355	GO:0003700		TRUE	1.42242	7.08962e-06	4.63511e-05	Chromosome_II	1254678	1254971	294	-	4.98064	6.16738	8.80117	16.3366	23.7025	19.1164	9.07135	31.9257	24.6278	40.1143	62.5581	85.2637	59.2829	54.4978	49.9471	46.1109	101.126	99.8629	87.3173	13.9703	13.3803	15.7848	0.864394	1.23718	2.31929	4.34322	3.36204	1.51028	5.17041	3.64012
pgaptmp_004164	pgaptmp_004164	tssK	protein_coding	protein_coding	pgaptmp_004164	0.4517	1326	GO:0033103	GO:0003674		TRUE	-1.36859	7.15004e-06	4.66882e-05	Chromosome_II	1004415	1005740	1326	+	6.38885	65.5284	68.6491	68.6138	90.9664	94.2167	79.1682	118.051	96.2724	99.9338	60.5401	87.0778	72.251	45.6603	59.9366	60.6029	79.2155	69.2383	48.9506	163.731	166.935	169.479	2.03631	2.1396	2.15978	3.69574	3.67391	2.9224	4.23895	3.15497
pgaptmp_000354	pgaptmp_000354	metH	protein_coding	protein_coding	pgaptmp_000354	0.476	3681	GO:0009086	GO:0008270,GO:0008705,GO:0031419		TRUE	1.50813	7.19994e-06	4.6917e-05	Chromosome_I	375859	379539	3681	+	11.4825	3068.27	2414.16	2355.74	1794.99	2253.69	1684.8	2180.6	3105.35	2921.31	2463.98	3107.59	2954.88	5496.91	4388.69	4633.49	4559.1	4842.69	5106.74	1470.23	1890.45	2061.17	34.3468	27.1045	26.7118	26.27	31.6572	22.4034	28.2061	36.6591
pgaptmp_000013	pgaptmp_000013	pgaptmp_000013	protein_coding	protein_coding	pgaptmp_000013	0.4208	183				TRUE	-1.85257	7.20291e-06	4.6917e-05	Chromosome_I	15915	16097	183	+	9.65733	1397.68	1534.04	1954.68	1284.42	1082.13	1252.67	1468.58	1167.21	1232.99	349.115	419.062	314.94	278.381	352.96	383.379	655.634	528.608	537.134	1556.29	1392.19	1006.91	314.714	346.44	445.825	378.112	305.753	335.057	382.102	277.163
pgaptmp_001885	pgaptmp_001885	pgaptmp_001885	protein_coding	protein_coding	pgaptmp_001885	0.4575	765		GO:0005524,GO:0016887,GO:0042626,GO:0140359		TRUE	-1.14312	7.23946e-06	4.70233e-05	Chromosome_I	2025258	2026022	765	-	8.66348	447.906	407.494	548.093	524.018	508.633	531.087	256.148	263.443	282.208	407.637	406.363	305.678	259.233	287.474	283.253	460.124	400.783	362.499	653.249	614.857	716.134	24.1259	22.0141	29.9043	36.9019	34.3785	33.981	15.9427	14.9645
pgaptmp_005159	pgaptmp_005159	yidZ	protein_coding	protein_coding	pgaptmp_005159	0.452	969	GO:0006355	GO:0003700		TRUE	1.15911	7.24127e-06	4.70233e-05	Chromosome_II	2125731	2126699	969	+	8.15994	259.801	280.757	214.01	245.994	221.887	163.284	253.92	240.308	268.132	302.701	257.605	279.741	543.505	642.653	611.299	257.872	246.329	239.461	272.699	288.632	279.973	11.0478	11.9743	9.21829	13.6762	11.84	8.24809	12.4769	10.7766
pgaptmp_000931	pgaptmp_000931	pgaptmp_000931	protein_coding	protein_coding	pgaptmp_000931	0.4388	1251				TRUE	-2.21809	7.24604e-06	4.70233e-05	Chromosome_I	977094	978344	1251	-	14.5891	30482.3	35195.9	37484.4	38248.8	39763.5	51104.7	28183.7	24048.7	24197.4	6681.61	7924.08	6771.22	8500.18	9006.02	13145.6	43204.5	37226.2	46485.9	63797.7	45781	41682	1004.03	1162.72	1250.64	1647.12	1643.51	1999.57	1072.69	835.356
pgaptmp_002893	pgaptmp_002893	pgaptmp_002893	protein_coding	protein_coding	pgaptmp_002893	0.4649	1953				TRUE	-1.08371	7.27585e-06	4.71586e-05	Chromosome_I	3145206	3147158	1953	+	10.3613	2620.37	2519.77	2284.68	1680.96	1614.66	1762.32	1858.37	1674.69	1636.24	538.807	863.522	535.399	698.161	648.203	652.14	1405.65	1118.46	2119.43	1440.05	1540.01	1556.05	55.2864	53.3213	48.8274	46.368	42.7486	44.1687	45.3067	37.2623
pgaptmp_003032	pgaptmp_003032	pgaptmp_003032	protein_coding	protein_coding	pgaptmp_003032	0.4457	516		GO:0015288	GO:0009279	TRUE	1.11613	7.36017e-06	4.75889e-05	Chromosome_I	3284365	3284880	516	-	12.2814	3571.69	3550.39	3357.99	3571.39	3888.14	3625.24	2450.11	2833.69	2741.14	8647.15	8891.01	9103.63	8330.8	7889.43	8365.83	7377.15	7531	7669.37	4137.99	3813.39	4099.08	285.221	284.36	271.626	372.865	389.616	343.891	226.083	238.639
pgaptmp_004278	pgaptmp_004278	pgaptmp_004278	protein_coding	protein_coding	pgaptmp_004278	0.4557	564		GO:0015288	GO:0009279	TRUE	-1.62108	7.36032e-06	4.75889e-05	Chromosome_II	1130130	1130693	564	-	7.90697	375.439	511.348	546.46	413.833	344.778	514.593	855.311	738.835	616.493	123.098	148.758	140.797	82.4832	68.8161	75.0949	158.431	81.2219	113.777	310.14	266.332	215.172	27.4296	37.4696	40.4408	39.5285	31.6086	44.6599	72.2067	56.9254
pgaptmp_004093	pgaptmp_004093	torS	protein_coding	protein_coding	pgaptmp_004093	0.469	2964	GO:0000160	GO:0000155,GO:0004673	GO:0016020	TRUE	-1.31932	7.37248e-06	4.76091e-05	Chromosome_II	900526	903489	2964	+	10.1487	1435.46	1410.83	1342.05	1919.9	1908.23	1398.64	2068.49	2201.58	2171.1	851.597	972.369	926.295	599.476	740.328	652.14	394.392	475.348	441.878	1662.46	1617.11	2058.68	19.9559	19.6715	18.8987	34.8952	33.2886	23.0972	33.2282	32.277
pgaptmp_001215	pgaptmp_001215	pgaptmp_001215	protein_coding	protein_coding	pgaptmp_001215	0.4523	555				TRUE	-2.01228	7.40354e-06	4.7751e-05	Chromosome_I	1297735	1298289	555	+	7.9238	548.126	544.792	609.356	517.612	491.565	357.906	601.39	655.25	655.2	70.6301	79.8213	105.598	76.5915	95.4545	113.301	74.1592	117.173	76.7334	309.022	498.257	501.792	40.6954	40.5676	45.8267	50.243	45.7965	31.5652	51.5937	51.304
pgaptmp_000627	pgaptmp_000627	panB	protein_coding	protein_coding	pgaptmp_000627	0.4541	795	GO:0015940	GO:0003864		TRUE	1.51557	7.42479e-06	4.78295e-05	Chromosome_I	634612	635406	795	-	11.8227	4420.47	4159.43	3461.73	2069.17	2412.08	1308.75	2337.26	2928.47	2937.49	4978.41	5260.95	5696.72	7292.4	7151.32	7384.33	3443.34	3885.33	4474.35	2225.74	2505.94	3392.91	229.118	216.226	181.747	140.214	156.881	80.579	139.982	160.071
pgaptmp_002702	pgaptmp_002702	tgt	protein_coding	protein_coding	pgaptmp_002702	0.46	1137	GO:0006400	GO:0008479	GO:0005737	TRUE	1.4669	7.43591e-06	4.78425e-05	Chromosome_I	2924643	2925779	1137	-	12.9052	8796.23	8156.04	6976.55	4373.43	5354.65	3326.71	5137.8	7759.26	7791.32	11327.1	11917	13220.1	13007.3	10090.4	11955.9	10608.1	10443	11367.1	3913.35	4401.48	5177.43	318.782	296.456	256.107	207.217	243.509	143.215	215.154	296.55
pgaptmp_000256	pgaptmp_000256	hflC	protein_coding	protein_coding	pgaptmp_000256	0.4689	981	GO:0045861		GO:0030288	TRUE	1.58817	7.45953e-06	4.79359e-05	Chromosome_I	267696	268676	981	+	13.0109	10520.8	8707.88	7564.67	4595.73	5078.82	3816.57	4477.02	7854.78	6156.49	13042.4	13339.2	16593.7	15480.3	14050.7	13266.8	10914.9	10633.4	11097.2	4809.12	4135.79	6222.55	441.913	366.847	321.856	252.377	267.694	190.431	217.296	347.939
pgaptmp_001052	pgaptmp_001052	pgaptmp_001052	protein_coding	protein_coding	pgaptmp_001052	0.5085	936				TRUE	2.00671	7.54071e-06	4.83985e-05	Chromosome_I	1116655	1117590	936	+	6.41918	64.7575	65.1286	69.4306	39.7177	62.1284	71.7462	58.6541	69.4057	57.7083	104.936	97.9626	94.4821	241.558	162.051	152.825	158.431	175.759	197.125	32.411	47.1496	48.1853	2.85084	2.87566	3.09611	2.28598	3.43209	3.75194	2.9837	3.22223
pgaptmp_004527	pgaptmp_004527	pgaptmp_004527	protein_coding	protein_coding	pgaptmp_004527	0.4231	891		GO:0001216		TRUE	-2.17809	7.55341e-06	4.8421e-05	Chromosome_II	1407158	1408048	891	-	8.63817	521.144	890.678	934.454	775.136	855.46	1105.06	1079.53	913.469	956.409	143.278	148.758	185.259	150.237	127.643	148.872	124.722	147.797	185.218	913.096	742.288	480.192	24.1012	41.3128	43.7745	46.8667	49.6439	60.7071	57.6887	44.5506
pgaptmp_000636	pgaptmp_000636	acnB	protein_coding	protein_coding	pgaptmp_000636	0.4681	2589	GO:0006099	GO:0003994,GO:0051539	GO:0005829	TRUE	1.5284	7.59469e-06	4.86263e-05	Chromosome_I	647251	649839	2589	+	11.7854	4364.96	3548.63	3192.99	2326.05	2971.92	1707.89	1882.87	3776.27	3189.44	3642.5	4147.08	3973.81	6127.32	5396.51	5765.18	6074.31	5583	6723.43	1720.02	2021.7	2632.75	69.4715	56.6462	51.4762	48.4006	59.3539	32.2894	34.6275	63.3823
pgaptmp_002981	pgaptmp_002981	rplR	protein_coding	protein_coding	pgaptmp_002981	0.5	354	GO:0006412	GO:0003735	GO:0005840	TRUE	3.27637	7.6464e-06	4.88392e-05	Chromosome_I	3237428	3237781	354	-	15.5838	61146.5	38253.4	28337.5	14021	22519.8	7362.64	11452.4	40928.5	31776.1	153108	170584	211820	211590	165691	177219	77154.2	86059.2	96008	13345.5	14643.1	33296.9	7117.49	4465.89	3341.17	2133.73	3289.32	1018.04	1540.37	5024.12
pgaptmp_000100	pgaptmp_000100	ftsY	protein_coding	protein_coding	pgaptmp_000100	0.4851	1239	GO:0006614,GO:0009306	GO:0003924,GO:0005047		TRUE	1.94297	7.65521e-06	4.88392e-05	Chromosome_I	104987	106225	1239	+	11.0527	2539.42	1913.37	1768.44	1205.63	1493.13	827.143	1199.81	1685.89	1679.87	3943.18	3671.78	4203.53	5125.74	5076.85	5122.26	1724.2	2105.11	2263.63	1018.71	1292.79	1925.75	84.4542	63.822	59.5744	52.421	62.3118	32.677	46.1078	59.1282
pgaptmp_004490	pgaptmp_004490	pgaptmp_004490	protein_coding	protein_coding	pgaptmp_004490	0.4041	339	GO:0000160	GO:0009927		TRUE	-1.46439	7.65578e-06	4.88392e-05	Chromosome_II	1366917	1367255	339	+	7.79995	303.744	394.292	379.01	500.956	443.774	408.211	477.4	415.688	501.781	100.9	94.3343	118.566	85.429	117.653	102.761	119.666	113.178	89.9633	331.933	331.959	281.635	36.9203	48.0685	46.665	79.6093	67.6871	58.941	67.0526	53.285
pgaptmp_002998	pgaptmp_002998	rpsJ	protein_coding	protein_coding	pgaptmp_002998	0.4679	312	GO:0006412	GO:0003723,GO:0003735	GO:0005840	TRUE	2.40996	7.67165e-06	4.88812e-05	Chromosome_I	3245143	3245454	312	-	16.8787	122880	81590.4	59627	39122	59737.5	25171.4	29665.6	81446.5	66476.4	433047	492233	487048	252368	278067	277922	349772	303912	296668	43700.6	40975.6	77794.4	16228.7	10807.5	7976.81	6755.08	9900.02	3948.98	4527.22	11343.7
pgaptmp_000075	pgaptmp_000075	dapF	protein_coding	protein_coding	pgaptmp_000075	0.503	831	GO:0009089	GO:0008837		TRUE	1.80766	7.68633e-06	4.89156e-05	Chromosome_I	82485	83315	831	+	11.617	3194.7	2344.63	2499.5	1769.36	2032.49	1557.8	2010.57	2985.94	2798.85	2845.38	3080.38	3249.44	6585.4	5581.87	5991.78	7115.91	7216.76	8338.8	1312.65	1939.51	2260.56	158.412	116.604	125.543	114.704	126.465	91.7578	115.2	156.141
pgaptmp_002928	pgaptmp_002928	cgtA	protein_coding	protein_coding	pgaptmp_002928	0.4638	1173		GO:0000287,GO:0003924,GO:0005525		TRUE	1.32036	7.69642e-06	4.89206e-05	Chromosome_I	3186557	3187729	1173	-	13.4462	8341.38	7738.87	7488.71	7242.72	7920.34	6611.37	4626.99	5473.35	5867.24	23094	23799.5	27342.4	22532.6	18400.5	19727.6	17080.2	17755.6	15481.6	8669.94	8750.08	8398.37	293.021	272.66	266.471	332.635	349.132	275.884	187.816	202.765
pgaptmp_004887	pgaptmp_004887	pgaptmp_004887	protein_coding	protein_coding	pgaptmp_004887	0.4193	477				TRUE	-1.26066	7.7564e-06	4.92251e-05	Chromosome_II	1819657	1820133	477	-	7.59935	255.946	231.471	261.386	221.01	206.867	184.726	218.282	214.934	199.868	191.71	248.535	179.701	103.104	119.873	97.4916	173.6	142.471	134.945	271.582	279.075	305.728	22.11	20.0548	22.872	24.9608	22.4242	18.9558	21.7888	19.5805
pgaptmp_003569	pgaptmp_003569	pgaptmp_003569	protein_coding	protein_coding	pgaptmp_003569	0.489	2448		GO:0016491,GO:0043546		TRUE	-2.32797	7.76968e-06	4.92251e-05	Chromosome_II	321191	323638	2448	+	9.66619	3137.66	1877.29	1650.82	2062.76	2863.37	1283.18	1914.05	5394.99	4366.12	169.512	170.527	196.375	276.908	253.065	326.729	185.398	214.372	213.001	1002.51	1542.56	2151.72	52.8144	31.6929	28.1467	45.3943	60.4797	25.6573	37.2285	95.7671
pgaptmp_000617	pgaptmp_000617	aceF	protein_coding	protein_coding	pgaptmp_000617	0.4842	1902	GO:0006096	GO:0004742	GO:0045254	TRUE	2.39634	7.78512e-06	4.92251e-05	Chromosome_I	622569	624470	1902	+	15.1609	46431.9	33625.7	28320.3	13340.7	17779	9566.98	16846.4	33384.9	28054	61341.3	58264.1	68340.2	92496	88458.6	94943.6	70978.7	76364.5	75845.6	12961.6	16110.5	26897.4	1005.92	730.639	621.483	377.86	483.325	246.205	421.724	762.741
pgaptmp_000866	pgaptmp_000866	bcp	protein_coding	protein_coding	pgaptmp_000866	0.4607	471		GO:0016209,GO:0016491		TRUE	-1.36579	7.79754e-06	4.92251e-05	Chromosome_I	914642	915112	471	-	12.2718	5116.61	6388.77	6631.85	6391.99	5153.24	7313.99	6944.2	6069.64	6091.04	2889.78	3428.69	3368.01	2829.47	2859.2	2889.18	4161.34	4575.05	4011.3	9249.98	7204.34	7074.1	447.631	560.58	587.699	731.105	565.723	760.092	701.995	559.989
pgaptmp_004843	pgaptmp_004843	pgaptmp_004843	protein_coding	protein_coding	pgaptmp_004843	0.3864	603		GO:0008080,GO:0016746		TRUE	-1.73485	7.80224e-06	4.92251e-05	Chromosome_II	1768910	1769512	603	-	11.1441	1595.04	2012.83	2232.4	3622.64	3154.21	4448.26	3185.88	2538.91	2667.95	1909.03	2302.12	1702.53	975.069	1134.35	1146.18	2339.38	1941.34	1518.79	4765.53	3812.11	2977.52	108.996	137.953	154.524	323.648	270.469	361.082	251.562	182.964
pgaptmp_003888	pgaptmp_003888	pgaptmp_003888	protein_coding	protein_coding	pgaptmp_003888	0.4448	888		GO:0001216		TRUE	-1.85962	7.80551e-06	4.92251e-05	Chromosome_II	657191	658078	888	-	8.04988	333.039	349.406	372.475	499.034	458.794	391.718	589.511	608.979	573.564	167.494	172.342	163.028	73.6457	135.412	122.523	139.891	113.178	104.516	435.313	477.868	441.976	15.454	16.2615	17.5075	30.2748	26.7146	21.592	31.6091	29.8007
pgaptmp_001752	pgaptmp_001752	pgaptmp_001752	protein_coding	protein_coding	pgaptmp_001752	0.4427	969				TRUE	-1.50988	7.8098e-06	4.92251e-05	Chromosome_I	1848480	1849448	969	-	9.39287	1346.8	1470.68	1216.26	1187.69	1207.07	860.954	1083.25	1106.76	1161.91	383.421	373.709	320.498	294.583	342.97	272.713	417.988	384.805	341.331	768.364	942.993	1104.11	57.2715	62.7241	52.3895	66.0302	64.4097	43.49	53.2275	49.6326
pgaptmp_002975	pgaptmp_002975	rpsM	protein_coding	protein_coding	pgaptmp_002975	0.4762	357	GO:0006412	GO:0003723,GO:0003735	GO:0005840	TRUE	2.55801	7.82866e-06	4.92498e-05	Chromosome_I	3234273	3234629	357	-	16.2965	94282.3	59821.5	47963.5	28648	42096.4	14491.9	21088.8	55944	49772	255417	282548	309648	240162	229849	246405	113833	117677	133656	32432.8	33262.8	64326.6	10882.3	6925.18	5607.68	4323.05	6097.06	1986.96	2812.65	6809.62
pgaptmp_003426	pgaptmp_003426	pgaptmp_003426	protein_coding	protein_coding	pgaptmp_003426	0.3822	450				TRUE	-1.90847	7.83243e-06	4.92498e-05	Chromosome_II	173964	174413	450	-	8.9564	434.8	502.547	521.955	959.632	903.934	983.005	1141.16	900.781	975.411	314.809	275.746	263.068	182.641	258.615	243.729	306.749	260.975	248.722	1126	962.745	714.472	39.814	46.1536	48.4129	114.883	103.865	106.924	120.744	86.985
pgaptmp_000748	pgaptmp_000748	glpK	protein_coding	protein_coding	pgaptmp_000748	0.4822	1518	GO:0006072	GO:0004370		TRUE	1.69669	7.85187e-06	4.93131e-05	Chromosome_I	784424	785941	1518	-	8.33295	481.056	336.205	311.213	250.478	252.61	179.778	201.948	238.815	294.171	397.547	901.618	437.211	508.155	410.676	380.744	492.147	491.326	742.197	115.115	122.334	172.803	13.0582	9.15321	8.55709	8.88919	8.60444	5.79692	6.33434	6.83641
pgaptmp_002227	pgaptmp_002227	mukB	protein_coding	protein_coding	pgaptmp_002227	0.4888	4464	GO:0007059,GO:0030261	GO:0003677		TRUE	2.03696	7.86987e-06	4.93661e-05	Chromosome_I	2410050	2414513	4464	-	13.3004	11176.1	8229.09	6819.72	4910.91	6293.4	3457.01	5041.29	9653.36	8132.64	16906.8	18748.9	20397	22027.4	22015.6	22021.2	14796.4	15205.8	17288.8	4456.51	4727.07	7992.12	103.163	76.185	63.7651	59.2655	72.8962	37.9061	53.7712	93.9706
pgaptmp_004549	pgaptmp_004549	pgaptmp_004549	protein_coding	protein_coding	pgaptmp_004549	0.4494	336				TRUE	-1.32086	7.87907e-06	4.93661e-05	Chromosome_II	1433627	1433962	336	+	8.77654	475.659	467.342	556.262	781.542	673.854	641.592	684.546	714.953	700.241	294.629	235.836	248.247	223.883	273.044	292.475	278.097	259.644	251.368	777.305	676.024	682.902	58.3331	57.4827	69.1005	125.308	103.698	93.4658	97.0054	92.4647
pgaptmp_004903	pgaptmp_004903	pgaptmp_004903	protein_coding	protein_coding	pgaptmp_004903	0.4771	2157	GO:0006508	GO:0008236		TRUE	1.12136	7.89777e-06	4.94052e-05	Chromosome_II	1838140	1840296	2157	-	9.14935	422.466	462.941	437.821	396.537	363.895	472.535	569.465	530.618	527.82	700.247	711.136	709.542	815.994	793.604	777.298	962.384	840.18	877.142	354.286	377.834	422.037	8.07048	8.86988	8.47203	9.9037	8.72307	10.723	12.5704	10.6898
pgaptmp_000923	pgaptmp_000923	ccmD	protein_coding	protein_coding	pgaptmp_000923	0.4444	207	GO:0015886,GO:0017004		GO:0016020	TRUE	1.68652	7.90409e-06	4.94052e-05	Chromosome_I	969500	969706	207	+	9.65273	740.857	639.845	726.163	450.988	564.617	453.568	559.813	705.251	635.495	1051.38	888.92	1109.7	1807.27	1299.74	1549.33	1205.09	1282.24	1395.75	396.196	564.521	561.608	147.476	127.746	146.421	117.371	141.035	107.252	128.767	148.051
pgaptmp_003086	pgaptmp_003086	pgaptmp_003086	protein_coding	protein_coding	pgaptmp_003086	0.4706	408		GO:0022857	GO:0016020	TRUE	1.24782	7.93345e-06	4.95299e-05	Chromosome_I	3338907	3339314	408	+	6.70738	85.5724	94.1725	93.9355	41.6396	66.2248	52.7788	74.2457	70.8983	80.9323	139.242	152.386	175.996	150.237	164.271	162.047	208.994	197.063	244.753	72.0865	62.4414	63.1394	8.64235	9.53906	9.60972	5.49807	8.39275	6.33187	8.66451	7.55115
pgaptmp_000281	pgaptmp_000281	kefB	protein_coding	protein_coding	pgaptmp_000281	0.5019	1797	GO:0006813	GO:0015503		TRUE	1.53962	8.03616e-06	5.01117e-05	Chromosome_I	296493	298289	1797	+	10.6431	1353.74	1375.62	1587.92	1119.78	1220.04	1134.74	1501.99	1723.95	1682.69	1255.2	1467.62	1465.4	3455.46	2385.25	2702.1	1978.7	2452.63	2935.71	921.478	1126.49	1061.74	31.0417	31.6368	36.8826	33.5699	35.105	30.9088	39.7972	41.6882
pgaptmp_003427	pgaptmp_003427	pgaptmp_003427	protein_coding	protein_coding	pgaptmp_003427	0.438	363				TRUE	-1.88237	8.06006e-06	5.02013e-05	Chromosome_II	174400	174762	363	-	7.92106	267.51	284.278	312.846	552.205	569.396	458.516	526.402	482.855	513.744	145.296	110.661	101.893	86.9019	115.433	113.301	139.891	154.455	75.4104	524.723	454.93	327.328	30.3663	32.3652	35.9721	81.9516	81.1058	61.8273	69.0468	57.8026
pgaptmp_002621	pgaptmp_002621	purL	protein_coding	protein_coding	pgaptmp_002621	0.4895	3912		GO:0004642		TRUE	1.13859	8.08993e-06	5.02691e-05	Chromosome_I	2831607	2835518	3912	-	9.2618	511.893	549.193	573.415	389.49	434.899	456.866	413.549	442.555	408.884	867.742	941.529	1055.98	966.231	852.431	990.725	778.671	920.071	813.638	464.93	443.462	432.837	5.39186	5.80187	6.11803	5.36367	5.74822	5.71641	5.03339	4.91593
pgaptmp_000867	pgaptmp_000867	pgaptmp_000867	protein_coding	protein_coding	pgaptmp_000867	0.4273	543				TRUE	-2.04754	8.09615e-06	5.02691e-05	Chromosome_I	915128	915670	543	-	11.7538	5633.13	5715.48	7549.15	6240.81	4546.3	4332.81	6041.38	5041.99	5461.88	1846.47	1919.34	1608.05	1117.94	1884.67	1894.5	1666.9	1896.06	1537.31	8479.94	6697.16	6393.69	427.473	435.005	580.282	619.163	432.914	390.573	529.747	403.496
pgaptmp_002086	pgaptmp_002086	pgaptmp_002086	protein_coding	protein_coding	pgaptmp_002086	0.4807	1758				TRUE	-1.61206	8.0996e-06	5.02691e-05	Chromosome_I	2258608	2260365	1758	-	8.69136	932.817	1061.42	1124.78	495.19	553.694	583.041	981.529	1018.7	1014.82	147.314	206.81	166.733	204.735	185.359	162.047	160.116	189.074	213.001	523.046	748.66	576.562	21.8643	24.9523	26.7047	15.1746	16.2853	16.2335	26.5838	25.1804
pgaptmp_000111	pgaptmp_000111	pgaptmp_000111	protein_coding	protein_coding	pgaptmp_000111	0.4881	795				TRUE	-1.12692	8.12277e-06	5.03024e-05	Chromosome_I	116286	117080	795	+	10.4712	1204.95	1386.18	1493.17	1677.11	1648.11	1809.32	1236.93	1264.97	1163.31	1093.76	1532.93	1307.93	1035.46	1041.12	1024.98	1321.38	1336.83	1141.74	2519.12	2502.12	2207.39	62.4541	72.0602	78.3939	113.647	107.192	111.399	74.0819	69.1436
pgaptmp_004736	pgaptmp_004736	cpaB	protein_coding	protein_coding	pgaptmp_004736	0.4436	825				TRUE	-1.80028	8.12409e-06	5.03024e-05	Chromosome_II	1653242	1654066	825	-	9.14925	129.515	139.058	159.282	1064.05	1075.98	1067.12	1015.68	1036.61	1057.75	490.375	580.519	761.415	399.16	369.609	557.283	279.782	258.312	296.35	1973.16	1362.88	1633.32	6.46881	6.96603	8.05849	69.4821	67.4365	63.313	58.6187	54.6007
pgaptmp_002897	pgaptmp_002897	pgaptmp_002897	protein_coding	protein_coding	pgaptmp_002897	0.4323	1395	GO:0000160,GO:0016310	GO:0000155,GO:0004673,GO:0016772	GO:0016020	TRUE	-1.16052	8.16683e-06	5.0417e-05	Chromosome_I	3149739	3151133	1395	-	8.85555	890.416	917.962	842.153	741.825	709.356	485.73	602.875	666.444	748.8	278.484	232.208	229.721	256.287	286.364	299.062	219.107	250.323	309.579	632.014	716.802	685.395	26.3013	27.1952	25.1975	28.6478	26.2926	17.0433	20.5772	20.76
pgaptmp_000507	pgaptmp_000507	pgaptmp_000507	protein_coding	protein_coding	pgaptmp_000507	0.4615	156				TRUE	2.37438	8.171e-06	5.0417e-05	Chromosome_I	519611	519766	156	+	7.14499	405.505	293.959	407.599	56.3736	54.6184	56.9021	60.139	49.2557	49.2632	341.043	540.608	489.084	381.485	211.998	306.967	104.497	177.09	162.728	69.2925	53.5212	38.2159	107.11	77.876	109.056	19.4677	18.1033	17.854	18.3554	13.7205
pgaptmp_000088	pgaptmp_000088	pgaptmp_000088	protein_coding	protein_coding	pgaptmp_000088	0.4721	1002	GO:0006006	GO:0016620,GO:0050661,GO:0051287		TRUE	1.63993	8.17133e-06	5.0417e-05	Chromosome_I	95523	96524	1002	+	8.21091	652.972	483.184	538.292	140.293	191.847	108.856	181.16	218.665	199.164	219.962	268.49	216.753	600.949	551.638	575.727	443.27	497.983	534.488	139.144	214.085	220.157	26.8525	19.9291	22.4228	7.54281	9.89991	5.31763	8.60848	9.48308
pgaptmp_002960	pgaptmp_002960	cysN	protein_coding	protein_coding	pgaptmp_002960	0.4731	1431	GO:0006790	GO:0003924,GO:0005525		TRUE	1.82256	8.1831e-06	5.04305e-05	Chromosome_I	3220325	3221755	1431	-	9.29403	397.025	470.863	525.222	412.552	370.039	351.309	484.082	476.884	458.851	1257.22	812.726	918.885	1583.38	1076.64	1218.64	937.102	1170.39	854.651	438.107	400.772	304.897	11.4324	13.5987	15.3195	15.5311	13.3706	12.0166	16.1069	14.4814
pgaptmp_003544	pgaptmp_003544	pgaptmp_003544	protein_coding	protein_coding	pgaptmp_003544	0.3782	156				TRUE	-1.70342	8.29175e-06	5.10403e-05	Chromosome_II	297623	297778	156	-	4.5571	33.9206	28.1637	35.1237	40.3583	36.8674	47.0061	80.1854	53.7334	66.8572	20.18	5.44236	9.26295	8.83748	4.43975	5.26982	30.3378	3.99452	13.2299	43.0284	37.5923	42.3699	8.95978	7.46118	9.3976	13.9371	12.2197	14.749	24.4739	14.9678
pgaptmp_003705	pgaptmp_003705	pgaptmp_003705	protein_coding	protein_coding	pgaptmp_003705	0.4598	261				TRUE	-1.95312	8.33925e-06	5.12727e-05	Chromosome_II	465093	465353	261	-	6.99272	89.427	110.895	102.104	221.651	162.49	189.674	262.087	115.676	151.308	78.7021	83.4496	81.514	35.3499	69.926	67.1901	134.835	133.151	142.883	283.876	247.217	260.865	14.1184	17.5595	16.3284	45.7502	32.1906	35.5713	47.8122	19.2593
pgaptmp_001273	pgaptmp_001273	pgaptmp_001273	protein_coding	protein_coding	pgaptmp_001273	0.4341	963	GO:0006310,GO:0015074	GO:0003677		TRUE	1.06232	8.3496e-06	5.12765e-05	Chromosome_I	1360373	1361335	963	-	8.70656	375.439	389.012	421.485	401.662	474.497	278.738	280.649	284.339	311.062	419.745	460.787	503.905	671.649	698.15	654.775	461.809	471.353	504.059	333.051	332.596	352.251	16.0647	16.6947	18.2682	22.4697	25.4772	14.1678	13.8762	12.8306
pgaptmp_001826	pgaptmp_001826	pgaptmp_001826	protein_coding	protein_coding	pgaptmp_001826	0.4092	567				TRUE	-1.36236	8.42203e-06	5.16467e-05	Chromosome_I	1957928	1958494	567	-	10.0313	1511.78	1994.34	1904.03	1928.23	1627.63	1815.1	2138.28	1776.19	1834	682.085	629.5	576.156	555.288	607.135	545.426	485.405	387.468	343.977	1844.63	1464.82	1398.21	109.866	145.365	140.163	183.206	148.428	156.693	179.562	136.127
pgaptmp_002495	pgaptmp_002495	flgA	protein_coding	protein_coding	pgaptmp_002495	0.4471	747	GO:0001539	GO:0005198	GO:0009428	TRUE	-1.14068	8.42951e-06	5.16467e-05	Chromosome_I	2714263	2715009	747	+	10.7618	2411.45	2518.01	2462.74	2310.03	2147.87	1824.17	2286.77	2334.42	2442.05	1461.03	1527.49	1395	963.286	1042.23	939.345	1194.97	1198.36	1164.23	2178.8	2176.53	2593.7	133.019	139.309	137.607	166.595	148.672	119.53	145.759	135.799
pgaptmp_004895	pgaptmp_004895	pgaptmp_004895	protein_coding	protein_coding	pgaptmp_004895	0.4493	612		GO:0031992	GO:0016020	TRUE	-2.53717	8.47383e-06	5.18579e-05	Chromosome_II	1830672	1831283	612	+	7.00816	194.273	147.86	182.97	318.382	262.168	103.908	100.974	148.513	144.271	98.8822	130.617	87.0718	27.9854	76.5856	55.3331	60.6757	70.5698	55.5655	340.874	334.508	456.93	13.0803	9.98481	12.4787	28.0261	22.1499	8.31058	7.85582	10.5451
pgaptmp_000820	pgaptmp_000820	glnD	protein_coding	protein_coding	pgaptmp_000820	0.4758	2625	GO:0008152	GO:0016779		TRUE	1.22719	8.56377e-06	5.23286e-05	Chromosome_I	863772	866396	2625	-	10.6946	1877.97	1558.69	1501.34	1317.09	1529.31	923.629	1177.54	1529.16	1469.45	1878.76	1919.34	1839.62	2654.19	2946.88	2907.62	1584.31	1920.03	1934.21	1138.86	1220.16	1497.9	29.4793	24.5398	23.872	27.0303	30.1239	17.2227	21.3589	25.3141
pgaptmp_003228	pgaptmp_003228	pgaptmp_003228	protein_coding	protein_coding	pgaptmp_003228	0.4457	267				TRUE	-1.29844	8.57064e-06	5.23286e-05	Chromosome_I	3495144	3495410	267	+	9.58978	686.892	991.892	695.123	998.709	639.717	951.668	1386.17	670.175	876.181	488.357	411.806	563.188	441.874	472.833	497.998	1130.93	813.55	849.359	1260.12	1042.39	1438.08	106.007	153.53	108.665	201.508	123.886	174.464	247.194	109.072
pgaptmp_003487	pgaptmp_003487	pgaptmp_003487	protein_coding	protein_coding	pgaptmp_003487	0.4577	2034			GO:0009279,GO:0016020	TRUE	-1.27332	8.68625e-06	5.2973e-05	Chromosome_II	233378	235411	2034	+	7.71375	229.735	252.594	263.836	368.35	367.991	284.511	351.925	310.46	380.734	157.404	121.546	144.502	120.779	144.292	125.158	91.0135	110.515	83.3483	309.581	371.463	362.221	4.65409	5.13231	5.41408	9.75605	9.35471	6.84669	8.23819	6.63273
pgaptmp_002870	pgaptmp_002870	pgaptmp_002870	protein_coding	protein_coding	pgaptmp_002870	0.4457	819	GO:0034220	GO:0005216		TRUE	-1.19914	8.69744e-06	5.29799e-05	Chromosome_I	3121952	3122770	819	+	10.0124	1395.37	1691.58	1937.52	1483.65	1364.09	1468.73	1528.72	1420.2	1368.11	579.167	497.069	439.064	581.801	688.161	669.267	733.164	676.405	713.091	1670.84	1638.77	1455.53	70.2043	85.3594	98.7424	97.5914	86.12	87.7793	88.8744	75.3537
pgaptmp_003493	pgaptmp_003493	pgaptmp_003493	protein_coding	protein_coding	pgaptmp_003493	0.4795	1806				TRUE	1.28831	8.90042e-06	5.41536e-05	Chromosome_II	243406	245211	1806	-	7.4465	117.18	95.0526	99.6534	106.982	135.863	125.35	145.522	132.841	142.159	268.394	250.349	253.805	285.745	308.562	297.745	256.186	239.671	359.853	103.939	131.892	137.91	2.67359	2.17514	2.30311	3.19121	3.88981	3.39733	3.83657	3.19633
pgaptmp_004637	pgaptmp_004637	pgaptmp_004637	protein_coding	protein_coding	pgaptmp_004637	0.4566	357				TRUE	-1.54103	8.9563e-06	5.44307e-05	Chromosome_II	1547535	1547891	357	-	8.21256	356.937	369.649	460.693	531.705	408.955	487.379	799.627	554.499	620.716	145.296	99.7767	146.355	104.577	143.182	148.872	262.928	238.34	189.187	463.812	443.462	370.529	41.1985	42.792	53.8622	80.2356	59.2313	66.8238	106.648	67.4948
pgaptmp_003678	pgaptmp_003678	pgaptmp_003678	protein_coding	protein_coding	pgaptmp_003678	0.4853	1257	GO:0009401			TRUE	-1.97361	9.01091e-06	5.46538e-05	Chromosome_II	434951	436207	1257	-	10.2873	4193.82	3648.08	3192.17	1807.16	2171.08	2002.3	2209.55	2998.62	2498.35	345.079	847.195	574.303	469.859	270.824	325.411	615.184	615.156	1878.64	1237.21	1659.79	1632.49	137.478	119.942	105.997	77.4506	89.3068	77.9697	83.6955	103.663
pgaptmp_000294	pgaptmp_000294	fusA	protein_coding	protein_coding	pgaptmp_000294	0.4686	2100	GO:0006414	GO:0003746,GO:0005525		TRUE	2.01955	9.01377e-06	5.46538e-05	Chromosome_I	305635	307734	2100	+	16.1728	83723.8	65495.7	55484.9	39712.6	53376.5	24317.8	28961	56959.7	51067.6	136738	140965	161666	190838	156036	156271	102891	105009	104212	34977	39657.3	57834	1642.81	1288.95	1102.8	1018.76	1314.24	566.811	656.64	1178.65
pgaptmp_000556	pgaptmp_000556	recO	protein_coding	protein_coding	pgaptmp_000556	0.4754	732	GO:0006281,GO:0006310	GO:0003677		TRUE	1.15501	9.0253e-06	5.46607e-05	Chromosome_I	562574	563305	732	+	10.1554	1012.22	873.076	955.692	730.294	801.524	677.878	721.669	849.287	760.06	1505.43	1652.66	1724.76	1830.83	1856.92	1800.96	1889.37	1726.96	1784.71	784.569	827.667	999.43	56.98	49.2927	54.4939	53.7466	56.6173	45.3287	46.9418	50.4174
pgaptmp_000146	pgaptmp_000146	rplA	protein_coding	protein_coding	pgaptmp_000146	0.4615	702	GO:0006412	GO:0003723,GO:0003735	GO:0015934	TRUE	1.84378	9.11294e-06	5.5128e-05	Chromosome_I	147680	148381	702	+	16.8781	149014	113965	99248.2	55186.5	77823	34884.3	58215.3	108941	103855	273894	284208	314064	276641	225889	247571	124872	123817	130543	59819.5	72386.2	90583.4	8746.78	6709.26	5901.01	4235.06	5732.11	2432.35	3948.51	6743.59
pgaptmp_000799	pgaptmp_000799	pgaptmp_000799	protein_coding	protein_coding	pgaptmp_000799	0.4348	207				TRUE	-2.04112	9.24957e-06	5.58903e-05	Chromosome_I	845965	846171	207	-	12.2405	5920.69	8399.84	10043.8	6481.68	5158.7	9982.61	10534.7	8242.86	7300.1	2807.04	2771.98	2599.19	1780.75	1709.3	1854.98	4677.08	3231.56	3046.84	10265.9	7707.06	5425	1178.58	1677.03	2025.19	1686.87	1288.59	2360.51	2423.18	1730.39
pgaptmp_003972	pgaptmp_003972	codB	protein_coding	protein_coding	pgaptmp_003972	0.4722	1239	GO:0055085	GO:0015209	GO:0016020	TRUE	1.27165	9.31329e-06	5.62108e-05	Chromosome_II	737789	739027	1239	-	8.04651	149.559	133.778	117.624	194.745	245.783	175.654	118.793	138.065	170.31	488.357	409.991	414.98	497.845	641.543	648.187	348.885	374.153	318.84	245.876	268.243	257.542	4.97393	4.46225	3.96245	8.46758	10.2571	6.93938	4.56513	4.84228
pgaptmp_002500	pgaptmp_002500	pgaptmp_002500	protein_coding	protein_coding	pgaptmp_002500	0.4683	1134				TRUE	-1.05324	9.32939e-06	5.62435e-05	Chromosome_I	2717296	2718429	1134	+	10.1502	1502.53	1581.57	1761.9	1326.7	1228.91	1168.56	1662.36	1682.9	1651.02	1130.08	1190.06	957.79	540.559	570.507	596.807	881.483	1006.62	915.508	1193.06	1285.78	1320.11	54.5969	57.6391	64.85	63.0266	56.034	50.4393	69.7984	64.4886
pgaptmp_003658	pgaptmp_003658	pgaptmp_003658	protein_coding	protein_coding	pgaptmp_003658	0.4577	555		GO:0016407		TRUE	-1.177	9.39068e-06	5.64737e-05	Chromosome_II	415380	415934	555	+	8.98855	474.888	528.95	578.316	731.575	605.581	726.533	1075.82	947.052	958.52	205.836	175.97	259.363	278.381	332.981	335.951	387.65	388.8	689.277	721.424	809.19	781.765	35.2579	39.388	43.4924	71.0117	56.4187	64.076	92.2953	74.1512
pgaptmp_002940	pgaptmp_002940	thiB	protein_coding	protein_coding	pgaptmp_002940	0.4642	993	GO:0015888	GO:0030975,GO:0048502	GO:0030288,GO:0055052	TRUE	1.25132	9.39659e-06	5.64737e-05	Chromosome_I	3199022	3200014	993	-	10.2599	1167.18	1003.33	1030.84	789.87	910.761	771.065	686.031	811.972	848.734	2013.97	1888.5	2241.64	2543.72	1963.48	2168.53	1196.66	1412.73	1488.36	935.448	954.462	1080.85	48.4335	41.7578	43.3294	42.852	47.4241	38.008	32.8948	35.5328
pgaptmp_004348	pgaptmp_004348	pgaptmp_004348	protein_coding	protein_coding	pgaptmp_004348	0.4403	888		GO:0001216		TRUE	-1.27419	9.39976e-06	5.64737e-05	Chromosome_II	1211129	1212016	888	+	9.79315	1323.67	1424.03	1686.76	1436.89	1206.38	1242.78	1461.16	1296.32	1566.57	494.411	502.512	463.148	524.357	518.34	453.204	475.293	548.58	489.506	1112.59	1404.93	1372.45	61.4223	66.2747	79.283	87.1712	70.2451	68.5035	78.3459	63.4361
pgaptmp_001753	pgaptmp_001753	pgaptmp_001753	protein_coding	protein_coding	pgaptmp_001753	0.436	867				TRUE	-1.19331	9.41178e-06	5.64814e-05	Chromosome_I	1849673	1850539	867	+	7.76664	515.747	521.909	472.128	290.836	341.365	219.362	337.076	336.58	368.77	147.314	139.687	96.3347	94.2665	108.774	93.5392	148.318	166.438	128.33	238.053	253.589	265.85	24.5119	24.8781	22.7291	18.0715	20.3584	12.3844	18.5115	16.8697
pgaptmp_003372	pgaptmp_003372	pgaptmp_003372	protein_coding	protein_coding	pgaptmp_003372	0.5067	1269				TRUE	1.67366	9.49604e-06	5.69221e-05	Chromosome_II	108219	109487	1269	-	4.20724	7.70923	8.80117	13.0693	7.6873	12.2891	10.7207	9.65194	17.9111	8.44511	38.3421	18.1412	11.1155	51.552	41.0676	47.4283	48.8776	41.2767	55.5655	7.26453	8.28305	13.2925	0.250327	0.286629	0.429864	0.326345	0.50073	0.413518	0.362148	0.613337
pgaptmp_001493	pgaptmp_001493	pgaptmp_001493	protein_coding	protein_coding	pgaptmp_001493	0.4349	768				TRUE	-1.2433	9.58796e-06	5.74078e-05	Chromosome_I	1543277	1544044	768	-	7.8272	462.554	427.737	360.222	426.005	429.437	204.518	311.832	290.31	327.952	117.044	134.245	138.944	117.833	147.622	155.46	72.4737	134.482	121.715	364.903	355.534	377.175	24.8176	23.0174	19.5772	29.8825	28.9123	13.0347	19.3327	16.4262
pgaptmp_001533	pgaptmp_001533	pgaptmp_001533	protein_coding	protein_coding	pgaptmp_001533	0.3983	723				TRUE	-1.42504	9.60626e-06	5.7452e-05	Chromosome_I	1591112	1591834	723	-	8.32201	536.562	546.553	642.846	698.904	767.388	691.897	706.077	593.307	662.238	183.638	172.342	138.944	156.129	169.82	121.206	143.262	110.515	100.547	443.695	467.036	412.068	30.5802	31.2417	37.1116	52.0767	54.8808	46.842	46.4993	35.6598
pgaptmp_003929	pgaptmp_003929	pgaptmp_003929	protein_coding	protein_coding	pgaptmp_003929	0.41	522				TRUE	-1.34213	9.62608e-06	5.74902e-05	Chromosome_II	700821	701342	522	+	10.3022	794.821	1058.78	1107.62	1971.79	1570.28	2180.42	1701.71	1379.9	1558.83	1178.51	928.83	1235.68	667.23	867.97	774.663	1164.64	934.717	960.49	2355.94	1980.92	1928.24	62.7418	83.8257	88.565	203.496	155.543	204.458	155.22	114.872
pgaptmp_004338	pgaptmp_004338	tesA	protein_coding	protein_coding	pgaptmp_004338	0.4461	603	GO:0006629	GO:0016298		TRUE	-1.14547	9.6345e-06	5.74902e-05	Chromosome_II	1196980	1197582	603	-	9.33677	636.782	840.512	777.623	1165.27	1071.2	1201.54	1415.87	1288.11	1276.62	302.701	344.683	277.889	441.874	433.985	428.173	284.839	287.605	328.101	1136.62	999.063	962.045	43.5143	57.606	53.8261	104.105	91.854	97.5336	111.799	92.8267
pgaptmp_002385	pgaptmp_002385	hutH	protein_coding	protein_coding	pgaptmp_002385	0.4942	1554	GO:0006548	GO:0004397		TRUE	1.54613	9.65838e-06	5.75674e-05	Chromosome_I	2596658	2598211	1554	+	10.751	1987.44	1483	1628.76	862.9	967.428	738.078	1026.82	1232.88	1289.29	2250.07	2666.76	2543.61	2842.72	3195.51	3466.22	2853.44	2842.77	3337.9	930.978	1067.88	1453.87	52.6988	39.4395	43.7469	29.9139	32.1893	23.2479	31.4612	34.4753
pgaptmp_004855	pgaptmp_004855	pgaptmp_004855	protein_coding	protein_coding	pgaptmp_004855	0.4815	783		GO:0005524		TRUE	-1.30809	9.68121e-06	5.76382e-05	Chromosome_II	1778366	1779148	783	+	8.78995	293.722	246.433	305.495	759.762	791.966	548.405	315.544	429.121	378.623	429.835	569.634	452.032	306.366	327.431	281.935	391.021	375.485	379.698	697.954	813.013	946.26	15.4573	13.007	16.2848	52.2733	52.2984	34.2825	19.1881	23.8153
pgaptmp_000836	pgaptmp_000836	rnhB	protein_coding	protein_coding	pgaptmp_000836	0.4726	639		GO:0003723,GO:0004523		TRUE	1.68783	9.84448e-06	5.85441e-05	Chromosome_I	882061	882699	639	+	10.0893	1192.62	859.874	864.207	538.111	738.03	429.652	492.992	761.97	686.166	1586.15	1919.34	2104.54	2252.09	1987.9	2036.78	2037.69	1989.27	2122.07	558.81	589.371	914.69	76.9057	55.6129	56.4492	45.3665	59.7197	32.9116	36.7343	51.8173
pgaptmp_005156	pgaptmp_005156	pgaptmp_005156	protein_coding	protein_coding	pgaptmp_005156	0.4488	459		GO:0008080,GO:0016746		TRUE	-1.85959	9.94247e-06	5.90601e-05	Chromosome_II	2123413	2123871	459	-	8.99238	531.166	638.965	762.92	1003.83	893.01	853.532	1158.98	1072.43	1114.76	199.782	304.772	300.12	269.543	189.799	148.872	348.885	336.871	285.766	759.982	858.888	796.719	47.6843	57.5315	69.3757	117.818	100.598	91.0206	120.225	101.53
pgaptmp_002676	pgaptmp_002676	pgaptmp_002676	protein_coding	protein_coding	pgaptmp_002676	0.4	225				TRUE	-1.91859	9.98045e-06	5.91802e-05	Chromosome_I	2899602	2899826	225	-	9.52975	1203.41	1219.84	1457.23	1168.47	1029.56	975.583	1743.29	1143.33	1121.79	343.061	330.17	300.12	217.991	406.237	368.887	493.833	440.728	501.413	1418.82	1225.89	1429.77	220.389	224.059	270.324	279.769	236.598	212.234	368.909	220.814
pgaptmp_000597	pgaptmp_000597	pgaptmp_000597	protein_coding	protein_coding	pgaptmp_000597	0.467	606				TRUE	2.29188	9.98518e-06	5.91802e-05	Chromosome_I	603210	603815	606	+	9.95215	1100.11	739.298	761.286	578.47	687.509	413.159	571.692	795.554	752.319	1574.04	1307.98	1380.18	3121.1	3586.2	2985.35	783.728	941.375	1128.51	489.518	574.716	1033.49	74.8032	50.4184	52.4344	51.4247	58.661	33.3716	44.9182	57.0472
pgaptmp_003091	pgaptmp_003091	spoT	protein_coding	protein_coding	pgaptmp_003091	0.4814	2121	GO:0015969	GO:0008728,GO:0008893		TRUE	1.36641	1.00924e-05	5.97485e-05	Chromosome_I	3342636	3344756	2121	+	13.6645	10742.8	11739	9641.05	8390.69	9369.1	6401.9	7709.68	9519.03	8683.69	20565.5	21689.6	23101.8	25398.9	24158.9	25749.6	15443.6	15331	14710.3	10648.1	8671.07	11773.8	208.706	228.735	189.725	213.119	228.403	147.741	173.073	195.025
pgaptmp_004585	pgaptmp_004585	pgaptmp_004585	protein_coding	protein_coding	pgaptmp_004585	0.4432	1893				TRUE	-1.54396	1.01518e-05	6.00326e-05	Chromosome_II	1473396	1475288	1893	-	9.42294	1285.13	1191.68	1070.87	1267.12	1104.66	938.473	1288.91	1691.86	1466.63	522.663	495.255	413.128	304.893	342.97	229.237	294.951	318.23	273.859	936.007	817.473	1026.02	27.974	26.0166	23.6116	36.0606	30.1731	24.2663	32.4193	38.8374
pgaptmp_000827	pgaptmp_000827	pgaptmp_000827	protein_coding	protein_coding	pgaptmp_000827	0.4353	843				TRUE	1.33436	1.01863e-05	6.01687e-05	Chromosome_I	871881	872723	843	+	12.0623	3961.77	3237.07	3227.3	2532.33	3316.02	2032.81	2166.49	2576.22	2664.43	7472.67	7486.88	7501.14	6725.32	7989.32	7944.25	6795.68	6295.36	7026.39	2884.02	2886.96	3785.87	193.651	158.696	159.791	161.829	203.392	118.032	122.366	132.798
pgaptmp_004069	pgaptmp_004069	elbB	protein_coding	protein_coding	pgaptmp_004069	0.4716	651				TRUE	-1.28491	1.02793e-05	6.06501e-05	Chromosome_II	858905	859555	651	-	8.75019	618.28	681.21	740.049	786.667	865.018	628.397	913.965	1020.94	956.409	207.854	172.342	216.753	195.898	175.37	221.332	267.984	280.948	259.306	489.518	583.636	497.638	39.1347	43.2456	47.4483	65.099	68.705	47.2483	66.8469	68.1483
pgaptmp_004005	pgaptmp_004005	pgaptmp_004005	protein_coding	protein_coding	pgaptmp_004005	0.4199	543				TRUE	-1.41523	1.03066e-05	6.0743e-05	Chromosome_II	773725	774267	543	-	7.69082	234.361	243.792	272.005	366.428	339.999	379.348	439.535	378.373	396.92	159.422	126.989	87.0718	113.414	123.203	97.4916	89.3281	109.183	91.2862	367.697	337.056	286.62	17.7845	18.555	20.9082	36.3541	32.3759	34.1956	38.5413	30.2801
pgaptmp_002382	pgaptmp_002382	pgaptmp_002382	protein_coding	protein_coding	pgaptmp_002382	0.4668	1371				TRUE	1.40965	1.03251e-05	6.07843e-05	Chromosome_I	2593189	2594559	1371	+	10.7297	1675.99	1528.76	1458.86	1178.08	1434.41	950.843	945.891	1075.42	1088.72	2512.41	2298.49	2402.81	2751.4	3519.61	3480.71	2106.79	2094.46	2282.16	1145.56	1192.76	1556.05	50.3722	46.0834	44.4137	46.2915	54.098	33.9472	32.8501	34.086
pgaptmp_000910	pgaptmp_000910	pgaptmp_000910	protein_coding	protein_coding	pgaptmp_000910	0.4595	888				TRUE	1.16509	1.03388e-05	6.07965e-05	Chromosome_I	957941	958828	888	+	11.92	4493.71	3956.13	3644.7	2788.57	3158.31	1853.86	2272.66	3219.53	2976.2	6292.14	7029.72	7480.76	5544.05	5447.57	5600.5	4417.53	4616.33	4820.97	2424.68	2405.91	3037.34	208.521	184.119	171.313	169.174	183.901	102.187	121.858	157.549
pgaptmp_002841	pgaptmp_002841	ftsL	protein_coding	protein_coding	pgaptmp_002841	0.4654	318	GO:0000910		GO:0016020	TRUE	1.03913	1.0351e-05	6.08007e-05	Chromosome_I	3090621	3090938	318	-	10.3263	993.719	940.845	1009.6	814.213	888.231	816.422	867.19	874.661	940.223	1800.06	2129.78	2319.44	1869.13	1690.43	1716.64	2607.37	2364.75	2127.37	901.92	869.72	947.091	128.764	122.274	132.515	137.935	144.425	125.667	129.843	119.523
pgaptmp_000516	pgaptmp_000516	ruvX	protein_coding	protein_coding	pgaptmp_000516	0.4953	426	GO:0006364			TRUE	2.76764	1.03732e-05	6.08632e-05	Chromosome_I	525468	525893	426	-	9.00184	595.152	349.406	326.732	270.977	374.136	109.681	135.127	328.371	308.95	877.832	758.303	807.73	1611.37	2533.98	2380.64	583.161	801.567	986.95	214.024	279.075	510.931	57.5674	33.8971	32.0128	34.2679	45.4113	12.6024	15.1031	33.496
pgaptmp_002401	pgaptmp_002401	pgaptmp_002401	protein_coding	protein_coding	pgaptmp_002401	0.4897	972				TRUE	1.40901	1.04262e-05	6.11059e-05	Chromosome_I	2612935	2613906	972	-	10.9963	2236.45	1782.24	1765.17	1327.34	1601	995.375	1172.34	1722.46	1760.1	2510.4	2799.19	2799.26	3996.01	3598.41	3914.16	2324.22	2520.54	2721.39	1205.35	1597.99	1797.81	94.8092	75.7776	75.7987	73.5666	85.1666	50.1249	57.4275	77.005
pgaptmp_005286	pgaptmp_005286	pgaptmp_005286	protein_coding	protein_coding	pgaptmp_005286	0.4778	1488	GO:0055085	GO:0022857		TRUE	-1.48561	1.05342e-05	6.16701e-05	Chromosome_II	2270591	2272078	1488	-	10.7248	1658.25	1761.99	1866.46	1958.34	2296.7	2246.4	2730.76	3178.48	2979.01	1678.98	2303.93	2015.62	988.325	754.757	737.774	874.741	966.673	800.408	2102.24	2748.7	2591.21	45.9205	48.9377	52.3548	70.9005	79.8078	73.8952	87.3802	92.8227
pgaptmp_003412	pgaptmp_003412	pgaptmp_003412	protein_coding	protein_coding	pgaptmp_003412	0.4313	684				TRUE	-1.0297	1.05465e-05	6.16735e-05	Chromosome_II	157030	157713	684	-	9.79863	945.922	938.205	1032.47	1262	1469.23	1189.17	1778.93	1644.09	1639.06	651.815	703.879	526.136	487.534	509.461	525.664	626.982	531.271	613.867	1054.47	1139.24	1140.66	56.9846	56.6869	63.0034	99.3956	111.065	85.0984	123.833	104.45
pgaptmp_001204	pgaptmp_001204	pgaptmp_001204	protein_coding	protein_coding	pgaptmp_001204	0.4697	1254	GO:0006596	GO:0102143,GO:0102144		TRUE	1.21689	1.0573e-05	6.176e-05	Chromosome_I	1282978	1284231	1254	+	11.1575	3210.12	2327.91	2441.51	1173.59	1390.72	1070.42	1593.31	2268.75	2199.25	4572.8	5409.71	5639.29	2936.99	3054.54	3190.87	2101.74	2374.08	2512.36	1213.74	1334.21	1645.78	105.483	76.7203	81.2646	50.4179	57.3437	41.782	60.4974	78.6187
pgaptmp_002756	pgaptmp_002756	pgaptmp_002756	protein_coding	protein_coding	pgaptmp_002756	0.4152	330				TRUE	-1.35674	1.07191e-05	6.25438e-05	Chromosome_I	2984344	2984673	330	-	10.4081	1903.41	2461.69	2354.92	1745.66	1650.16	1786.23	2594.89	1856.04	2154.91	776.931	743.79	694.722	867.546	768.076	833.948	805.638	713.687	730.29	2689.55	2054.83	2014.65	237.671	308.291	297.854	284.977	258.556	264.946	374.401	244.406
pgaptmp_004574	pgaptmp_004574	pgaptmp_004574	protein_coding	protein_coding	pgaptmp_004574	0.4151	1407				TRUE	-1.35939	1.08249e-05	6.30125e-05	Chromosome_II	1462621	1464027	1407	+	8.07729	278.303	303.64	314.48	450.348	417.148	408.211	392.017	388.821	428.59	191.71	192.297	183.407	142.873	166.49	126.476	195.511	138.477	210.355	437.548	424.984	368.867	8.15046	8.91881	9.3291	17.2432	15.3299	14.2011	13.2661	12.0086
pgaptmp_002682	pgaptmp_002682	hisS	protein_coding	protein_coding	pgaptmp_002682	0.4815	1269	GO:0006427	GO:0004821,GO:0005524	GO:0005737	TRUE	1.61383	1.08345e-05	6.30125e-05	Chromosome_I	2905753	2907021	1269	-	13.1428	9554.05	7607.73	7988.61	4699.5	6072.88	4344.35	5506.06	7874.19	7575.27	10945.7	10746.9	13409.1	17063.7	14909.8	16769.9	15187.5	16050	18257.2	4350.34	5610.81	7000.16	310.23	247.762	262.755	199.505	247.444	167.57	206.591	269.638
pgaptmp_000239	pgaptmp_000239	pgaptmp_000239	protein_coding	protein_coding		0.5	1000				TRUE	2.02369	1.08353e-05	6.30125e-05	pgaptmp_000239	1	1000	1000	+	11.9105	1164.09	1209.28	1281.61	1438.17	1895.26	3195.59	991.181	1032.13	838.178	14773.8	19055.5	18866.8	11743.5	7485.41	8799.27	16840.9	13556.1	11278.5	3104.75	2153.59	2044.55	47.9674	49.9768	53.4929	77.4771	97.9968	156.417	47.1939	44.851
pgaptmp_002109	pgaptmp_002109	pgaptmp_002109	protein_coding	protein_coding	pgaptmp_002109	0.4592	453	GO:0006355	GO:0003700		TRUE	1.24637	1.08569e-05	6.30684e-05	Chromosome_I	2289267	2289719	453	-	8.41479	265.968	266.675	261.386	240.228	223.253	151.739	175.22	182.097	226.611	472.213	536.98	527.988	500.791	500.581	517.759	935.417	868.142	885.08	183.849	237.023	245.911	24.193	24.3291	24.0838	28.5687	25.4825	16.3958	18.417	17.4679
pgaptmp_003254	pgaptmp_003254	pgaptmp_003254	protein_coding	protein_coding	pgaptmp_003254	0.459	390				TRUE	1.56262	1.09189e-05	6.33583e-05	Chromosome_I	3522322	3522711	390	-	15.1645	36268.8	28878.4	28179	16283.6	20520.8	15129.4	20731.6	27804.1	24775.1	77521.6	102240	87134.8	59136	54436.8	57857.3	69724.8	65998.8	68915.8	17195.1	19279.1	25382	3832.01	3060.2	3015.8	2249.32	2720.66	1898.84	2531.06	3098
pgaptmp_000964	pgaptmp_000964	recR	protein_coding	protein_coding	pgaptmp_000964	0.48	600	GO:0006281,GO:0006310	GO:0003677,GO:0046872		TRUE	1.35706	1.09969e-05	6.37411e-05	Chromosome_I	1017100	1017699	600	+	13.3373	5826.63	6685.37	7278.78	6178.67	6974.08	9091.15	6408.15	5640.52	5452.73	14517.5	14581.9	15002.3	21448.6	17703.5	20417.9	19969	19133.7	18065.4	9002.43	8300.25	7385.65	400.152	460.485	506.347	554.764	601.007	741.652	508.527	408.512
pgaptmp_003652	pgaptmp_003652	pgaptmp_003652	protein_coding	protein_coding	pgaptmp_003652	0.4523	1353				TRUE	2.05555	1.10231e-05	6.38224e-05	Chromosome_II	409699	411051	1353	+	7.92064	103.304	106.494	131.51	147.34	121.526	124.525	203.433	192.545	198.46	228.034	484.37	287.152	813.048	411.786	662.679	406.19	738.986	554.332	148.085	168.847	144.556	3.14613	3.25289	4.05696	5.86661	4.64424	4.50496	7.15908	6.18403
pgaptmp_000566	pgaptmp_000566	ispD	protein_coding	protein_coding	pgaptmp_000566	0.481	711	GO:0008299,GO:0019288	GO:0050518		TRUE	1.66571	1.10838e-05	6.40182e-05	Chromosome_I	576475	577185	711	+	10.9606	1858.69	1553.41	1636.11	1221.64	1486.98	974.758	1086.96	1442.59	1392.74	2599.19	2768.35	2986.38	4378.97	3895.88	4147.34	2855.13	2894.69	3386.85	1089.68	1235.45	1836.86	107.72	90.2936	96.0471	92.5631	108.139	67.1058	72.7907	88.1682
pgaptmp_004748	pgaptmp_004748	pgaptmp_004748	protein_coding	protein_coding	pgaptmp_004748	0.4576	909		GO:0016491		TRUE	-1.54238	1.10905e-05	6.40182e-05	Chromosome_II	1667700	1668608	909	-	10.4418	2274.22	2290.94	2210.34	2476.59	2536.34	1716.96	3739.01	3862.84	4049.43	563.023	645.827	640.996	642.19	734.778	671.901	547.767	519.287	710.445	1598.76	2285.48	2528.07	103.093	104.158	101.493	146.776	144.274	92.4547	195.851	184.663
pgaptmp_002766	pgaptmp_002766	murJ	protein_coding	protein_coding	pgaptmp_002766	0.4549	1563	GO:0009252,GO:0034204			TRUE	1.19495	1.10934e-05	6.40182e-05	Chromosome_I	2995661	2997223	1563	-	11.1725	1968.94	2058.59	2099.26	1510.55	1833.81	1930.55	1727.7	1775.44	1725.62	2869.6	3220.07	3141.99	3970.98	3127.8	3478.08	2860.18	3311.46	3390.82	1543.99	1720.96	1634.15	51.9076	54.4319	56.0592	52.0645	60.6652	60.4581	52.631	49.3611
pgaptmp_002211	pgaptmp_002211	ybgE	protein_coding	protein_coding	pgaptmp_002211	0.4488	303				TRUE	1.1771	1.1131e-05	6.41276e-05	Chromosome_I	2393667	2393969	303	-	12.9812	6434.89	6265.55	7025.56	3952.55	3899.75	4624.74	6346.53	6978.63	5820.79	14796	14728.9	15839.7	11180.9	10094.9	11328.8	17405.5	15019.4	14497.3	5419.9	5153.33	4732.13	875.098	854.591	967.786	702.748	665.485	747.098	997.301	1000.84
pgaptmp_004950	pgaptmp_004950	yghU	protein_coding	protein_coding	pgaptmp_004950	0.4971	861	GO:0006749	GO:0005515		TRUE	1.93712	1.11367e-05	6.41276e-05	Chromosome_II	1882520	1883380	861	-	10.1993	1167.18	957.567	879.727	855.853	847.95	663.034	1461.16	1653.8	1479.3	1333.9	1057.63	1157.87	2297.75	2027.85	2132.96	1616.33	1999.92	1768.84	385.02	668.378	726.103	55.8588	45.9629	42.6467	53.5501	50.9226	37.6934	80.8028	83.4673
pgaptmp_002150	pgaptmp_002150	pgaptmp_002150	protein_coding	protein_coding	pgaptmp_002150	0.457	291				TRUE	-1.47997	1.1173e-05	6.42662e-05	Chromosome_I	2336367	2336657	291	-	8.60446	629.073	483.184	430.47	283.149	296.987	185.55	335.591	473.899	479.964	520.645	471.672	457.59	179.695	226.427	226.602	374.167	402.115	374.406	564.957	572.804	794.227	89.0771	68.6217	61.7434	52.4187	52.7702	31.2106	54.9098	70.7669
pgaptmp_002696	pgaptmp_002696	trmJ	protein_coding	protein_coding	pgaptmp_002696	0.4681	720	GO:0006396	GO:0003723,GO:0008173		TRUE	1.10498	1.12307e-05	6.45275e-05	Chromosome_I	2918651	2919370	720	-	12.1933	3559.35	3607.6	3672.47	2934.63	3344.69	3724.2	2897.81	2713.54	2763.66	6354.69	7777.14	7729.01	8149.63	7086.94	8157.67	6947.37	7230.08	6215.4	3800.47	3706.98	4050.06	203.703	207.075	212.896	219.576	240.197	253.182	191.633	163.773
pgaptmp_004583	pgaptmp_004583	pgaptmp_004583	protein_coding	protein_coding	pgaptmp_004583	0.4385	732				TRUE	-1.13603	1.12711e-05	6.46888e-05	Chromosome_II	1471582	1472313	732	-	11.9509	14981.3	15185.5	14869.6	20458.5	22028.3	13011.6	23045.9	32620.7	30002.7	1172.46	1493.02	1376.48	771.807	762.526	803.647	1075.31	1179.71	891.695	1628.93	1770.66	2105.2	843.331	857.355	847.869	1505.66	1556.01	870.068	1499.05	1936.51
pgaptmp_002241	pgaptmp_002241	topA	protein_coding	protein_coding	pgaptmp_002241	0.4728	2631	GO:0006260,GO:0006265	GO:0003677,GO:0003917	GO:0005737	TRUE	1.58452	1.12875e-05	6.47124e-05	Chromosome_I	2427744	2430374	2631	-	14.1076	20091.8	16169.5	14412.2	9464.35	12429.1	7966.3	9803.41	15059.5	13961.9	26621.5	28334.8	30601.1	32557.3	29265.7	30877.2	24644.4	25718	31018.8	9219.81	9832.61	13900.6	314.67	253.991	228.638	193.791	244.266	148.207	177.414	248.73
pgaptmp_002523	pgaptmp_002523	prfA	protein_coding	protein_coding	pgaptmp_002523	0.4747	1089	GO:0006415	GO:0003747		TRUE	1.62545	1.13146e-05	6.4797e-05	Chromosome_I	2742952	2744040	1089	-	12.1372	4464.41	3729.06	3586.7	2371.53	2973.29	1680.67	2107.84	2919.52	2808.7	7488.81	8939.99	8951.72	8364.68	9037.1	9248.53	7434.46	7178.15	7212.94	2517.44	2647.39	4033.44	168.925	141.518	137.47	117.318	141.173	75.542	92.1598	116.499
pgaptmp_002628	pgaptmp_002628	pgaptmp_002628	protein_coding	protein_coding	pgaptmp_002628	0.4806	516	GO:0015628		GO:0015627	TRUE	1.63286	1.13904e-05	6.51497e-05	Chromosome_I	2842948	2843463	516	-	6.37609	60.132	66.0088	66.9801	67.9045	70.3211	61.0255	40.0927	35.076	45.0406	135.206	108.847	125.976	131.089	146.512	197.618	139.891	166.438	174.635	55.881	46.5125	41.5391	4.80191	5.28681	5.41798	7.08946	7.04661	5.78888	3.69954	2.95391
pgaptmp_004236	pgaptmp_004236	cyoC	protein_coding	protein_coding	pgaptmp_004236	0.4633	600	GO:0019646	GO:0009486		TRUE	1.21385	1.14009e-05	6.51497e-05	Chromosome_II	1088312	1088911	600	+	13.5248	6454.94	6591.2	7531.18	6350.35	7849.34	9338.55	14029.5	15058.1	13711.3	21990.2	24351	20789.8	15867.7	13714.4	13376.1	21116.8	18237.6	20675.7	6327.41	6828.42	6533.27	443.301	453.999	523.905	570.178	676.435	761.835	1113.33	1090.57
pgaptmp_000101	pgaptmp_000101	ftsE	protein_coding	protein_coding	pgaptmp_000101	0.4696	675	GO:0000910	GO:0005524		TRUE	1.68626	1.15181e-05	6.5748e-05	Chromosome_I	106248	106922	675	+	10.568	1445.48	1166.15	1263.64	778.339	912.809	590.463	896.888	1130.64	1014.82	2851.44	2837.29	2667.73	2696.9	2967.97	3068.35	2349.5	2480.6	2728	726.453	883.1	1268.6	88.2402	71.3993	78.1375	62.1197	69.923	42.8175	63.2656	72.7878
pgaptmp_004739	pgaptmp_004739	pgaptmp_004739	protein_coding	protein_coding	pgaptmp_004739	0.4007	891	GO:0006355	GO:0003677,GO:0003700		TRUE	-1.70152	1.15506e-05	6.58319e-05	Chromosome_II	1655362	1656252	891	+	9.31455	142.621	166.342	195.223	1302.36	1406.42	1928.08	1542.08	1299.3	1247.06	450.015	480.742	489.084	514.047	412.896	548.061	283.153	356.844	298.996	2141.92	1618.38	1384.91	6.59573	7.71554	9.1452	78.7438	81.6173	105.92	82.4068	63.3681
pgaptmp_003563	pgaptmp_003563	pgaptmp_003563	protein_coding	protein_coding	pgaptmp_003563	0.4294	531				TRUE	-1.49814	1.15578e-05	6.58319e-05	Chromosome_II	316573	317103	531	-	8.21081	228.964	263.155	338.168	472.129	447.188	533.561	553.873	361.208	440.553	163.458	165.085	205.638	170.858	150.951	165.999	261.243	207.715	232.846	564.957	546.044	397.114	17.7677	20.4814	26.5815	47.8994	43.5451	49.1838	49.6648	29.5597
pgaptmp_003730	pgaptmp_003730	pgaptmp_003730	protein_coding	protein_coding	pgaptmp_003730	0.4194	453				TRUE	-1.35914	1.16404e-05	6.61689e-05	Chromosome_II	488112	488564	453	+	8.10311	272.136	321.243	353.688	773.215	505.22	899.713	774.383	613.457	693.907	153.368	70.7507	92.6295	89.8477	106.554	94.8567	328.66	254.318	260.629	270.464	319.853	245.911	24.754	29.3074	32.5884	91.953	57.6668	97.2162	81.3936	58.8469
pgaptmp_004681	pgaptmp_004681	rbsD	protein_coding	protein_coding	pgaptmp_004681	0.4476	420		GO:0016872		TRUE	-2.03961	1.16421e-05	6.61689e-05	Chromosome_II	1594576	1594995	420	-	6.42553	575.879	413.655	307.128	177.449	129.719	150.09	325.196	283.593	303.32	14.126	56.2378	27.7889	19.1479	14.4292	15.8094	42.1359	22.6356	44.9816	67.0572	111.503	120.463	56.499	40.7034	30.5219	22.7608	15.9697	17.4918	36.8663	29.3416
pgaptmp_002914	pgaptmp_002914	leuB	protein_coding	protein_coding	pgaptmp_002914	0.4716	1092	GO:0009098	GO:0003862		TRUE	1.32795	1.16904e-05	6.63715e-05	Chromosome_I	3172247	3173338	1092	+	9.50327	941.297	837.871	910.766	549.002	503.854	420.581	590.996	705.998	712.205	472.213	613.173	465	994.217	1344.13	1350.39	1060.14	1151.75	1151	469.401	519.92	558.285	35.5191	31.71	34.8117	27.0841	23.8576	18.8521	25.7688	28.0943
pgaptmp_003253	pgaptmp_003253	atpB	protein_coding	protein_coding	pgaptmp_003253	0.4416	813	GO:0015986	GO:0015078	GO:0045263	TRUE	1.70369	1.17188e-05	6.64612e-05	Chromosome_I	3521501	3522313	813	-	15.7227	60756.4	41953.4	38189.3	22194.5	30414.2	16857.1	23600.5	42996.5	35566.6	129760	145493	144574	93381.3	92290.1	96013.4	99312.6	92754	108402	26054	26520.4	39655.7	3079.36	2132.64	1960.61	1470.68	1934.33	1014.9	1382.18	2298.16
pgaptmp_004737	pgaptmp_004737	pgaptmp_004737	protein_coding	protein_coding	pgaptmp_004737	0.3539	438				TRUE	-2.40268	1.17436e-05	6.65302e-05	Chromosome_II	1654088	1654525	438	-	9.0084	94.0526	113.535	85.7672	1151.17	1267.15	1971.78	1352.01	1340.35	1221.73	389.475	489.813	644.702	365.283	256.395	430.807	146.633	151.792	178.604	2785.11	1715.86	1502.05	8.8482	10.7127	8.17313	141.589	149.588	220.352	146.974	132.979
pgaptmp_001468	pgaptmp_001468	pgaptmp_001468	protein_coding	protein_coding	pgaptmp_001468	0.4771	807		GO:0051073		TRUE	1.40904	1.19998e-05	6.79085e-05	Chromosome_I	1519663	1520469	807	+	8.38795	327.642	309.801	303.044	219.088	245.1	220.187	253.92	253.741	252.65	381.403	576.891	450.18	609.786	485.042	465.061	537.654	474.016	588.73	222.965	172.032	213.511	16.7296	15.8654	15.6738	14.6255	15.7041	13.3552	14.9816	13.6633
pgaptmp_001698	pgaptmp_001698	ccoO	protein_coding	protein_coding	pgaptmp_001698	0.467	621		GO:0004129		TRUE	1.74142	1.20364e-05	6.80424e-05	Chromosome_I	1795940	1796560	621	+	11.1499	2349	1920.42	1775.79	1054.44	1741.64	956.616	1332.71	2257.55	2186.58	5258.92	6264.16	5474.41	4311.22	3707.19	3181.65	2617.48	2375.41	3663.36	1027.65	979.948	1552.73	155.865	127.804	119.355	91.4735	145.014	75.4013	102.183	157.973
pgaptmp_002004	pgaptmp_002004	pgaptmp_002004	protein_coding	protein_coding	pgaptmp_002004	0.4548	963				TRUE	1.02425	1.20793e-05	6.82115e-05	Chromosome_I	2170845	2171807	963	+	10.2774	1330.61	1360.66	1436.81	907.102	966.745	914.557	980.044	1087.36	1049.31	1463.05	1543.82	1641.4	1643.77	1664.9	1818.09	1392.17	1430.04	1528.05	828.715	893.295	946.26	56.9356	58.3936	62.2748	50.7451	51.9074	46.4855	48.4565	49.0663
[truncated: 4,346 more rows]
[truncated: 14 more columns]
