# Supplementary material for: Phage Resistance in Vibrio harveyi: Evolutionary strategies and physiological trade-offs
Source: Research Square preprint supplement (doi:10.21203/rs.3.rs-7655806/v1), 2025-10-10
Supplement: Supplementary file 2 [file 18777fc9ed5679edbdfad699.xlsx]

## Sheet: Sheet1
gene_id	transcript_id	gene_name	type	biotypes	description	gc	featWidth	GO BP	GO MF	GO CC	isPresent	log2 Ratio	pValue	fdr	seqnames	start	end	width	strand	log2 Mean	R10D4_1 [normalized count]	R10D4_2 [normalized count]	R10D4_3 [normalized count]	R3D4_1 [normalized count]	R3D4_2 [normalized count]	R3D4_3 [normalized count]	R4D4_1 [normalized count]	R4D4_2 [normalized count]	R4D4_3 [normalized count]	VH2_T10_1 [normalized count]	VH2_T10_2 [normalized count]	VH2_T10_3 [normalized count]	VH2_T25_1 [normalized count]	VH2_T25_2 [normalized count]	VH2_T25_3 [normalized count]	VH2_T45_1 [normalized count]	VH2_T45_2 [normalized count]	VH2_T45_3 [normalized count]	VH2_WT1 [normalized count]	VH2_WT2 [normalized count]	VH2_WT3 [normalized count]	R10D4_1 [FPKM]	R10D4_2 [FPKM]	R10D4_3 [FPKM]	R3D4_1 [FPKM]	R3D4_2 [FPKM]	R3D4_3 [FPKM]	R4D4_1 [FPKM]	R4D4_2 [FPKM]
pgaptmp_000215	pgaptmp_000215	pgaptmp_000215	protein_coding	protein_coding	pgaptmp_000215	0.4795	684				TRUE	5.70199	3.28159e-11	1.56374e-07	Chromosome_I	233990	234673	684	+	9.23236	135.682	127.617	130.693	82.6385	75.1002	70.9215	87.61	105.974	97.1188	6108.5	5072.28	5064.98	8086.3	10145.9	8934.97	5470.92	6120.93	5618.73	101.703	99.3965	103.848	8.17383	7.7107	7.97511	6.50864	5.67713	5.07522	6.0986	6.73259
pgaptmp_000874	pgaptmp_000874	pgaptmp_000874	protein_coding	protein_coding	pgaptmp_000874	0.4653	288				TRUE	-5.46314	6.9558e-11	1.56374e-07	Chromosome_I	920871	921158	288	+	10.2505	6399.43	8735.16	8183.01	8447.06	7447.21	11364.8	11322.5	7830.16	8578.83	110.99	92.5202	122.271	100.158	114.323	71.1425	112.924	110.515	116.423	4901.88	5838.27	5458.23	915.603	1253.49	1185.94	1580.07	1337.04	1931.53	1871.9	1181.45
pgaptmp_002057	pgaptmp_002057	bioD	protein_coding	protein_coding	pgaptmp_002057	0.4664	684	GO:0009102	GO:0000287,GO:0004141,GO:0005524		TRUE	-6.39667	8.92039e-11	1.56374e-07	Chromosome_I	2222016	2222699	684	-	10.2834	7580.48	9970.84	11653.7	11644.3	10424.6	10215.2	10366.9	9221.26	8993.34	102.918	96.1484	101.893	97.2123	71.0359	65.8727	74.1592	94.5369	71.4414	7264.53	8047.3	7247.74	456.666	602.445	711.131	917.113	788.038	731.008	721.65	585.83
pgaptmp_004312	pgaptmp_004312	focA	protein_coding	protein_coding	pgaptmp_004312	0.4442	1452	GO:0015724	GO:0015499	GO:0005886	TRUE	-7.8106	2.8312e-10	2.39114e-07	Chromosome_II	1167435	1168886	1452	-	11.6379	41065.5	38359.9	45677.2	53121.8	47145.2	37002.9	71352.4	79334.4	77673.2	121.08	97.9626	77.8088	51.552	91.0148	105.396	143.262	98.5314	92.6092	22800	28861.3	29269.3	1165.38	1091.82	1313.03	1970.93	1678.86	1247.39	2339.78	2374.28
pgaptmp_002271	pgaptmp_002271	pgaptmp_002271	protein_coding	protein_coding	pgaptmp_002271	0.4411	501				TRUE	-7.24325	3.23457e-10	2.39114e-07	Chromosome_I	2464169	2464669	501	+	11.6521	21608.2	27634.8	39560.8	33181.6	23044.8	34133	38943.4	29614.6	31206.1	165.476	121.546	124.124	154.656	162.051	159.412	203.938	181.085	193.156	37944.9	27764.1	25961.9	1777.21	2279.61	3295.85	3567.99	2378.37	3334.8	3701.08	2568.65
pgaptmp_002058	pgaptmp_002058	bioC	protein_coding	protein_coding	pgaptmp_002058	0.4428	822	GO:0009102	GO:0010340		TRUE	-4.68123	3.44057e-10	2.39114e-07	Chromosome_I	2222696	2223517	822	-	10.0107	4035.78	5096.76	6153.19	5559.84	5713.08	5955.76	5390.24	4644.96	4689.15	125.116	152.386	168.586	78.0644	130.972	129.11	153.375	126.493	140.237	3709.94	4187.4	3546.61	202.308	256.25	312.442	364.38	359.37	354.648	312.226	245.554
pgaptmp_001887	pgaptmp_001887	pgaptmp_001887	protein_coding	protein_coding	pgaptmp_001887	0.4444	1125				TRUE	-5.22095	3.49465e-10	2.39114e-07	Chromosome_I	2026712	2027836	1125	-	10.3176	9170.13	9874.03	10038.9	6185.08	6722.15	4931.52	10672.1	11363.1	10892.8	115.026	92.5202	101.893	110.469	115.433	89.5869	150.004	130.488	146.852	4870.03	6511.11	5558.76	335.878	362.73	372.454	296.181	308.958	214.566	451.678	438.918
pgaptmp_004131	pgaptmp_004131	dcuC	protein_coding	protein_coding	pgaptmp_004131	0.4664	1368	GO:0015740	GO:0015556		TRUE	-5.24715	3.63741e-10	2.39114e-07	Chromosome_II	946011	947378	1368	-	11.9501	12149	15517.3	16181.4	20590.4	20474.4	19834.9	28392.3	25983.1	24312.1	417.727	449.902	339.024	633.353	628.224	698.251	465.18	426.082	432.617	15152.1	19349.2	16854.1	365.941	468.784	493.709	810.856	773.871	709.704	988.206	825.358
pgaptmp_003173	pgaptmp_003173	pgaptmp_003173	protein_coding	protein_coding	pgaptmp_003173	0.497	330		GO:0022857	GO:0016020	TRUE	3.95361	4.31477e-10	2.52127e-07	Chromosome_I	3440405	3440734	330	-	8.13107	202.753	211.228	164.183	69.1857	88.0721	91.5382	73.5033	76.8687	73.191	492.393	538.794	639.144	854.29	628.224	687.711	2042.75	2323.48	2077.09	130.762	131.892	128.771	25.3169	26.4533	20.7661	11.2945	13.7997	13.5775	10.6054	10.1222
pgaptmp_000208	pgaptmp_000208	pgaptmp_000208	protein_coding	protein_coding	pgaptmp_000208	0.4399	291		GO:0005524,GO:0140662		TRUE	5.47688	7.38209e-10	3.59133e-07	Chromosome_I	226729	227019	291	+	12.3183	1232.71	1235.68	996.534	827.666	1185.22	1164.43	766.216	923.917	921.925	18375.9	17600.6	22357.1	94614.1	62602.6	65795	51409.2	51390.8	54946.4	1048.33	1077.43	1406.51	174.552	175.492	142.935	153.224	210.596	195.864	125.369	137.968
pgaptmp_003333	pgaptmp_003333	pgaptmp_003333	protein_coding	protein_coding	pgaptmp_003333	0.4242	825	GO:0006355	GO:0003700,GO:0043565		TRUE	-4.14288	7.51182e-10	3.59133e-07	Chromosome_II	69464	70288	825	+	8.15895	563.545	719.936	723.712	1062.13	776.263	781.786	1478.23	1191.09	1299.84	38.3421	36.2824	68.5459	33.877	44.3975	63.2378	65.732	65.2438	74.0874	1470.23	1361.61	1251.16	28.147	36.0646	36.6145	69.3566	48.6518	46.3838	85.3142	62.7377
pgaptmp_002266	pgaptmp_002266	pgaptmp_002266	protein_coding	protein_coding	pgaptmp_002266	0.4632	1548				TRUE	-5.74299	9.17007e-10	4.01878e-07	Chromosome_I	2457020	2458567	1548	+	12.8403	39559.9	46254.5	47795.2	38983.6	40810.2	32680	41893.9	46495.8	43678.8	916.174	1008.65	983.726	924.99	746.987	848.44	517.429	572.548	702.507	29239.2	36454.3	32051.5	1053.03	1234.88	1288.71	1356.67	1363.14	1033.34	1288.58	1305.21
pgaptmp_004423	pgaptmp_004423	cobA	protein_coding	protein_coding	pgaptmp_004423	0.4585	759	GO:0019354	GO:0004851		TRUE	-4.74353	1.01505e-09	4.10043e-07	Chromosome_II	1293073	1293831	759	-	9.20059	1776.98	2569.94	3060.67	4336.92	3884.73	3683.79	4207.51	3992.69	3949.5	82.7381	54.4236	79.6614	54.4978	54.3869	71.1425	79.2155	58.5863	70.1184	2227.98	2224.32	1799.47	96.4713	139.934	168.312	307.825	264.645	237.567	263.946	228.592
pgaptmp_001861	pgaptmp_001861	pgaptmp_001861	protein_coding	protein_coding	pgaptmp_001861	0.4861	2448	GO:0009061	GO:0009055,GO:0009389,GO:0030151,GO:0043546,GO:0051539		TRUE	-4.3904	1.12063e-09	4.10043e-07	Chromosome_I	1991306	1993753	2448	-	8.89042	3646.46	2774.13	2234.03	2114.01	2900.23	2057.55	2006.12	3113.55	2756.63	48.4321	88.892	66.6933	69.2269	75.4757	77.7298	50.5631	43.9397	56.8885	1072.92	1280.05	1375.77	61.3789	46.8335	38.0907	46.5221	61.2584	41.1407	39.0192	55.2691
pgaptmp_000166	pgaptmp_000166	cadB	protein_coding	protein_coding	pgaptmp_000166	0.4744	1347		GO:0043872		TRUE	-5.57487	1.16955e-09	4.10043e-07	Chromosome_I	173853	175199	1347	+	12.2264	43792.3	39169.6	35770.7	19275.9	20403.4	14857.2	18097.4	25387.6	22119.2	298.665	487.999	329.761	506.682	367.389	403.141	610.128	721.676	812.315	29257.6	35731.8	38976.9	1339.64	1201.78	1108.41	770.924	783.21	539.887	639.707	819.013
pgaptmp_002706	pgaptmp_002706	pgaptmp_002706	protein_coding	protein_coding	pgaptmp_002706	0.4452	447				TRUE	-4.32855	1.5696e-09	5.15907e-07	Chromosome_I	2929160	2929606	447	+	9.47361	3932.48	4647.9	4774.38	2458.02	1957.39	2786.56	5314.51	3688.95	3809.45	68.6121	70.7507	100.04	95.7394	89.9048	111.984	109.553	114.51	104.516	2699.05	2438.4	1983.91	362.507	429.725	445.81	296.238	226.419	305.136	566.094	358.619
pgaptmp_003005	pgaptmp_003005	pgaptmp_003005	protein_coding	protein_coding	pgaptmp_003005	0.4739	918	GO:0009234	GO:0046428	GO:0016020	TRUE	-4.671	1.73472e-09	5.36642e-07	Chromosome_I	3253099	3254016	918	+	12.7428	30096.8	32603	35849.1	19465.5	18026.1	14974.3	30702.8	31706.5	29866.8	1438.84	1647.22	1391.3	1159.18	1311.94	1338.53	785.413	922.734	1038.55	21876.9	25404.1	23591.7	1350.94	1467.77	1629.96	1142.32	1015.32	798.431	1592.46	1500.87
pgaptmp_002810	pgaptmp_002810	pgaptmp_002810	protein_coding	protein_coding	pgaptmp_002810	0.4677	945		GO:0051536,GO:1904047		TRUE	-3.3885	2.07647e-09	5.79747e-07	Chromosome_I	3044127	3045071	945	-	9.85626	3563.98	4254.48	4381.48	3774.47	3429.35	2756.04	2652.06	2652.34	2591.24	197.764	194.111	205.638	187.06	219.767	229.237	182.027	195.731	190.51	1920.07	2272.74	2030.43	155.404	186.062	193.522	215.173	187.639	142.754	133.624	121.965
pgaptmp_000496	pgaptmp_000496	pgaptmp_000496	protein_coding	protein_coding	pgaptmp_000496	0.4148	135				TRUE	3.31977	2.16366e-09	5.79747e-07	Chromosome_I	515117	515251	135	+	8.88148	1658.25	1249.77	1622.23	128.122	118.795	75.0448	156.658	170.156	145.678	1448.93	1460.37	1402.41	796.846	1190.96	1441.29	1191.6	1193.03	1140.42	119.585	107.042	102.186	506.146	382.593	501.555	51.1273	45.4996	27.2095	55.2526	54.771
pgaptmp_005092	pgaptmp_005092	pgaptmp_005092	protein_coding	protein_coding	pgaptmp_005092	0.4357	1407		GO:0008270,GO:0016805		TRUE	-4.52141	2.20478e-09	5.79747e-07	Chromosome_II	2054189	2055595	1407	-	9.29805	2365.19	3169.3	3196.26	2745.65	2484.45	3087.56	4511.17	3684.47	3701.07	113.008	50.7954	61.1355	86.9019	62.1564	79.0472	92.699	83.8849	109.808	2496.21	2674.15	2009.66	69.2676	93.0917	94.8176	105.127	91.302	107.412	152.661	113.794
pgaptmp_002772	pgaptmp_002772	lgt	protein_coding	protein_coding	pgaptmp_002772	0.4684	822	GO:0009249	GO:0008961	GO:0016020	TRUE	3.98509	2.33296e-09	5.809e-07	Chromosome_I	3002007	3002828	822	-	12.9123	2742.17	2223.18	2648.98	1789.86	2205.9	2025.39	1718.79	1960.52	2102.83	37236.2	33087.8	36557.2	69135.6	48686.2	56405.5	34438.5	38117	35309.3	2069.27	2312.88	2425.88	137.462	111.775	134.508	117.304	138.758	120.606	99.5597	103.642
pgaptmp_004022	pgaptmp_004022	narQ	protein_coding	protein_coding	pgaptmp_004022	0.4266	1737	GO:0000160	GO:0000155,GO:0046983	GO:0016020	TRUE	-3.1137	2.45766e-09	5.809e-07	Chromosome_II	789724	791460	1737	+	11.5299	5411.11	6065.77	6039.65	9368.26	8810.62	7040.2	8992.64	9175.73	9431.78	912.138	1186.44	989.284	830.723	836.892	824.726	744.962	786.92	773.949	6788.98	6836.06	6587.27	128.364	144.32	145.128	290.552	262.271	198.389	246.502	229.551
pgaptmp_001112	pgaptmp_001112	pgaptmp_001112	protein_coding	protein_coding	pgaptmp_001112	0.4535	333				TRUE	-5.04893	2.54054e-09	5.809e-07	Chromosome_I	1184583	1184915	333	-	8.10233	1751.54	1749.67	1758.64	1131.96	933.974	987.953	1775.96	1563.49	1601.76	38.3421	39.9107	35.1992	30.9312	32.1882	44.7934	33.7087	17.3096	25.1368	1022.62	1073.61	1273.59	216.737	217.147	220.431	183.126	145.022	145.219	253.934	204.028
pgaptmp_003006	pgaptmp_003006	rraA	protein_coding	protein_coding	pgaptmp_003006	0.4545	528	GO:0051252	GO:0008428		TRUE	-3.76856	3.03576e-09	6.48889e-07	Chromosome_I	3254092	3254619	528	+	12.5847	20766.3	22662.1	22540.4	16300.9	15229	13151	23903.4	22407.6	23014.3	1501.39	1493.02	1406.12	1322.68	1268.66	1292.42	1215.2	1360.8	1315.05	15907.1	19316.1	18302.9	1620.63	1773.82	1781.84	1663.19	1491.35	1219.15	2155.55	1844.16
pgaptmp_005155	pgaptmp_005155	pgaptmp_005155	protein_coding	protein_coding	pgaptmp_005155	0.4327	513				TRUE	-3.38524	3.08466e-09	6.48889e-07	Chromosome_II	2122874	2123386	513	+	9.11163	1006.83	1164.39	1516.04	1461.23	1211.84	1523.16	2135.31	1488.86	1579.94	191.71	217.695	198.227	181.168	174.26	148.872	131.464	125.162	101.87	1295.32	1307.45	1402.36	80.8714	93.8047	123.348	153.449	122.144	145.332	198.187	126.117
pgaptmp_004026	pgaptmp_004026	pepT	protein_coding	protein_coding	pgaptmp_004026	0.4561	1230	GO:0006508	GO:0008270,GO:0045148		TRUE	-5.50712	3.28629e-09	6.64715e-07	Chromosome_II	793633	794862	1230	+	10.9906	10769.8	11489	10861.4	16037.6	14591.3	7877.23	15002.8	17091	17975.4	175.566	197.739	201.932	148.764	184.249	187.078	207.309	222.361	179.927	6838.72	10890.9	11300.3	360.795	386.029	368.571	702.424	613.384	313.474	580.766	603.808
pgaptmp_000985	pgaptmp_000985	pgaptmp_000985	protein_coding	protein_coding	pgaptmp_000985	0.4482	2037				TRUE	-3.35016	3.80609e-09	7.19248e-07	Chromosome_I	1041601	1043637	2037	-	11.6704	12483.6	12170.3	11857.1	6700.12	6826.61	4003.77	5667.92	6513.69	6597.04	1886.83	2064.47	1848.89	720.255	896.829	915.63	721.366	745.643	739.551	6872.25	7168.66	8803.79	252.526	246.917	242.957	177.197	173.284	96.2078	132.485	138.955
pgaptmp_004424	pgaptmp_004424	pgaptmp_004424	protein_coding	protein_coding	pgaptmp_004424	0.4641	849	GO:0015724	GO:0015499	GO:0005886	TRUE	-4.23831	3.87009e-09	7.19248e-07	Chromosome_II	1294128	1294976	849	-	10.7855	4433.58	6311.32	7308.19	8491.91	9365.68	12266.1	11157.6	11027.3	9630.25	274.448	366.453	298.267	251.868	156.501	187.078	291.58	227.688	293.704	5143.29	6121.17	4560.99	215.181	307.223	359.288	538.842	570.395	707.184	625.745	564.415
pgaptmp_000400	pgaptmp_000400	pgaptmp_000400	protein_coding	protein_coding	pgaptmp_000400	0.4728	1377				TRUE	4.42627	3.96619e-09	7.19248e-07	Chromosome_I	435859	437235	1377	-	11.8978	1271.25	1274.41	1195.84	864.822	984.496	608.605	991.923	1273.93	1347	9367.57	5560.28	7182.5	60952.1	56843.2	58459.4	18656.1	23260.1	25613.1	921.478	1085.08	1121.55	38.0413	38.2487	36.2477	33.8343	36.9678	21.6339	34.2986	40.2021
pgaptmp_002778	pgaptmp_002778	pgaptmp_002778	protein_coding	protein_coding	pgaptmp_002778	0.4531	1035		GO:0047834		TRUE	-2.73686	4.28309e-09	7.50826e-07	Chromosome_I	3008346	3009380	1035	+	11.1889	6653.06	7679.9	7035.36	5600.84	4801.64	3072.72	6553.67	7130.88	6863.06	653.833	571.448	553.925	908.788	1300.85	1123.79	635.409	637.791	632.389	4154.19	4278.51	4457.97	264.874	306.66	283.718	291.526	239.879	145.316	301.493	299.392
pgaptmp_002888	pgaptmp_002888	pgaptmp_002888	protein_coding	protein_coding		0.5	1000				TRUE	-4.1797	4.65622e-09	7.89905e-07	pgaptmp_002888	1	1000	1000	+	9.65862	4136	4847.68	6693.11	3945.51	3586.38	4765.76	3592.01	3632.98	3433.64	193.728	38.0966	116.713	98.6852	120.983	106.714	128.093	129.156	109.808	2433.06	2763.35	1912.46	170.427	200.344	279.363	212.553	185.439	233.273	171.029	157.87
pgaptmp_000688	pgaptmp_000688	pgaptmp_000688	protein_coding	protein_coding	pgaptmp_000688	0.4299	528				TRUE	-3.10673	5.84813e-09	9.61103e-07	Chromosome_I	714585	715112	528	+	10.8192	5157.47	6166.98	6252.84	5609.17	4650.75	4162.93	5355.34	5096.47	5364.05	437.907	569.634	505.757	511.101	532.769	507.22	463.495	419.424	416.742	3307.6	4133.88	3982.77	402.496	482.703	494.293	572.307	455.442	385.92	482.932	419.443
pgaptmp_004845	pgaptmp_004845	pgaptmp_004845	protein_coding	protein_coding	pgaptmp_004845	0.4372	915	GO:0000160,GO:0006935	GO:0000156		TRUE	-3.41115	6.2226e-09	9.91657e-07	Chromosome_II	1770267	1771181	915	+	11.5563	7677.62	8596.1	8419.89	6719.98	6007.34	5037.08	13214.3	11791.5	11460	895.994	950.6	848.487	639.245	759.196	781.25	881.483	655.101	689.277	8078.72	7977.85	7896.58	345.751	388.259	384.084	395.65	339.473	269.457	687.629	559.997
pgaptmp_003160	pgaptmp_003160	pgaptmp_003160	protein_coding	protein_coding	pgaptmp_003160	0.485	600				TRUE	-2.91128	7.38985e-09	1.10067e-06	Chromosome_I	3423597	3424196	600	-	10.8646	4104.39	5210.29	4627.35	2923.74	2789.63	2071.57	5595.9	4521.82	4765.16	678.049	662.154	624.323	699.634	904.598	835.266	547.767	581.868	592.699	3925.08	4749.37	4497.02	281.875	358.883	321.901	262.513	240.403	168.998	444.07	327.491
pgaptmp_001206	pgaptmp_001206	pgaptmp_001206	protein_coding	protein_coding	pgaptmp_001206	0.4756	513				TRUE	-5.59155	7.91846e-09	1.10067e-06	Chromosome_I	1285666	1286178	513	-	9.97819	7268.26	8918.22	8676.38	4819.94	3990.55	3924.6	10194.7	7936.13	8224.13	62.5581	107.033	92.6295	100.158	106.554	151.507	55.6194	115.841	71.4414	3913.35	4604.1	4594.22	583.81	718.46	705.931	506.161	402.216	374.464	946.213	672.247
pgaptmp_003174	pgaptmp_003174	pgaptmp_003174	protein_coding	protein_coding	pgaptmp_003174	0.4709	378		GO:0022857	GO:0016020	TRUE	3.80357	7.95443e-09	1.10067e-06	Chromosome_I	3440737	3441114	378	-	8.80447	316.849	357.327	310.396	89.0446	126.305	152.564	109.884	111.945	97.1188	900.03	1219.09	1265.32	1546.56	846.881	1038.15	2740.52	3648.33	3061.4	217.377	247.854	186.926	34.5397	39.0676	34.274	12.6905	17.2772	19.7557	13.8412	12.8691
pgaptmp_001115	pgaptmp_001115	pgaptmp_001115	protein_coding	protein_coding	pgaptmp_001115	0.3833	240				TRUE	-4.70221	7.95926e-09	1.10067e-06	Chromosome_I	1186061	1186300	240	-	8.11934	912.002	1333.38	1407.4	1567.57	1249.39	1621.3	1434.43	1000.04	1097.16	68.6121	32.6542	64.8407	22.0937	34.408	27.6665	38.765	31.9561	35.7207	1474.7	1055.13	908.875	156.582	229.606	244.764	351.868	269.174	330.662	284.577	181.069
pgaptmp_002119	pgaptmp_002119	pgaptmp_002119	protein_coding	protein_coding	pgaptmp_002119	0.5088	1710				TRUE	2.60462	8.14523e-09	1.10067e-06	Chromosome_I	2303167	2304876	1710	-	8.92038	383.149	332.684	418.217	178.089	266.264	305.952	277.679	302.997	269.54	692.175	800.028	789.204	1721.84	1374.1	1410.99	1110.7	1163.74	1172.17	181.054	184.776	179.449	9.23271	8.0404	10.2081	5.61055	8.05121	8.7577	7.73178	7.6998
pgaptmp_002400	pgaptmp_002400	pgaptmp_002400	protein_coding	protein_coding	pgaptmp_002400	0.4963	945		GO:0001216		TRUE	2.91652	8.22339e-09	1.10067e-06	Chromosome_I	2611919	2612863	945	-	8.2649	183.48	163.702	182.153	111.466	148.835	80.8175	95.0345	105.974	108.379	744.643	707.507	805.877	936.773	981.184	1053.96	1215.2	1091.83	1177.46	156.467	127.431	155.356	8.00045	7.15918	8.04537	6.3544	8.14361	4.18607	4.78831	4.87311
pgaptmp_004089	pgaptmp_004089	yccS	protein_coding	protein_coding	pgaptmp_004089	0.474	2154			GO:0016020	TRUE	-3.14191	8.56741e-09	1.10067e-06	Chromosome_II	894296	896449	2154	-	10.6875	3032.81	3248.51	3169.3	3476.58	3558.39	2572.14	4625.51	4775.56	4609.62	702.265	709.322	681.753	631.88	755.867	843.17	379.223	346.192	448.493	3268.48	3743.3	3592.3	58.0173	62.3276	61.4128	86.9503	85.4184	58.4496	102.246	96.3421
pgaptmp_002889	pgaptmp_002889	pgaptmp_002889	protein_coding	protein_coding	pgaptmp_002889	0.4249	273				TRUE	-4.36564	8.65002e-09	1.10067e-06	Chromosome_I	3141035	3141307	273	-	11.1075	10681.9	14706.8	15272.3	9550.19	9913.91	11468.7	12342.6	10059.3	10011.7	300.683	344.683	314.94	279.854	257.505	227.92	350.571	356.844	247.399	7533.32	7094.11	5567.9	1612.29	2226.36	2334.98	1884.58	1877.7	2056.28	2152.67	1601.2
pgaptmp_000096	pgaptmp_000096	pgaptmp_000096	protein_coding	protein_coding	pgaptmp_000096	0.4324	222				TRUE	-3.58259	8.79027e-09	1.10067e-06	Chromosome_I	102888	103109	222	+	10.8885	5861.33	8156.04	8821.77	7119.08	4817.34	8475.12	9285.17	7320.44	7276.17	240.142	185.04	216.753	272.489	269.715	259.538	647.207	535.265	526.55	7742.31	7154	5861.99	1087.93	1518.34	1658.61	1727.57	1122.01	1868.64	1991.45	1432.92
pgaptmp_001081	pgaptmp_001081	pabC	protein_coding	protein_coding	pgaptmp_001081	0.4571	816	GO:0046656	GO:0008696,GO:0030170		TRUE	3.59452	9.15882e-09	1.12014e-06	Chromosome_I	1150442	1151257	816	+	11.2187	1023.01	959.327	986.732	634.202	801.524	580.567	619.952	717.192	710.797	7676.49	4952.55	6154.31	16729.4	19763.5	18415.4	9585.07	10163.4	11105.2	842.686	695.776	1003.58	51.6595	48.5868	50.4719	41.8699	50.7891	34.8253	36.1743	38.1929
pgaptmp_001147	pgaptmp_001147	pgaptmp_001147	protein_coding	protein_coding	pgaptmp_001147	0.4704	1065	GO:0055085	GO:0022857	GO:0016020	TRUE	2.76539	9.79464e-09	1.17068e-06	Chromosome_I	1216454	1217518	1065	-	9.26929	372.356	349.406	320.198	241.509	314.738	202.868	233.874	211.202	209.72	2147.16	2420.04	2615.86	1707.11	1743.71	1760.12	1580.94	1816.17	1808.53	229.112	249.766	266.681	14.4068	13.5589	12.549	12.2166	15.2807	9.3239	10.456	8.6176
pgaptmp_002937	pgaptmp_002937	pgaptmp_002937	protein_coding	protein_coding	pgaptmp_002937	0.4612	438				TRUE	-3.23853	1.05464e-08	1.22114e-06	Chromosome_I	3196208	3196645	438	+	11.281	6484.23	9511.42	9850.16	7824.39	6313.88	7375.01	9839.79	8824.23	8739.29	542.843	469.857	485.379	363.81	479.493	428.173	751.704	619.15	822.899	7057.21	7361.08	6545.73	610.018	897.456	938.664	962.367	745.36	824.179	1069.66	875.467
pgaptmp_000341	pgaptmp_000341	pgaptmp_000341	protein_coding	protein_coding	pgaptmp_000341	0.4629	1875	GO:0006790,GO:0019344	GO:0004783,GO:0010181,GO:0050660	GO:0009337	TRUE	3.2911	1.06812e-08	1.22114e-06	Chromosome_I	358091	359965	1875	+	9.29285	330.726	295.719	288.341	186.417	206.184	182.252	200.463	230.606	230.833	2074.51	1832.26	2097.13	2493.64	2861.42	2911.57	2288.82	2725.59	1984.48	229.112	247.217	215.172	7.26817	6.51808	6.41869	5.3561	5.68589	4.75777	5.09057	5.3445
pgaptmp_004377	pgaptmp_004377	modA	protein_coding	protein_coding	pgaptmp_004377	0.4303	753	GO:0015689			TRUE	-2.95944	1.10742e-08	1.23299e-06	Chromosome_II	1241733	1242485	753	-	9.99385	1813.98	1939.78	2090.27	2470.83	2447.58	1707.89	2838.41	3076.99	3093.02	377.367	402.735	420.538	380.012	436.205	383.379	237.646	259.644	296.35	1918.4	2209.02	2256.4	99.265	106.463	115.864	176.771	168.069	111.019	179.479	177.569
pgaptmp_000505	pgaptmp_000505	pgaptmp_000505	protein_coding	protein_coding	pgaptmp_000505	0.4762	483				TRUE	2.89618	1.12538e-08	1.23299e-06	Chromosome_I	518838	519320	483	+	8.41861	834.909	499.026	763.737	81.9979	71.6866	47.0061	71.2759	74.6298	81.6361	1438.84	1630.9	1771.08	1187.17	1068.87	1360.93	782.042	870.805	769.98	112.321	93.6621	96.3706	71.2279	42.699	65.999	9.14576	7.67423	4.76365	7.02633	6.71433
pgaptmp_003864	pgaptmp_003864	pgaptmp_003864	protein_coding	protein_coding	pgaptmp_003864	0.4336	708				TRUE	-2.78285	1.15371e-08	1.23824e-06	Chromosome_II	631232	631939	708	-	8.35637	654.513	742.819	872.375	671.998	643.131	573.145	971.877	795.554	847.326	102.918	126.989	105.598	122.252	182.03	167.317	92.699	83.8849	82.0253	602.956	693.227	643.856	38.0929	43.3602	51.4294	51.1328	46.9689	39.6245	65.3598	48.8285
pgaptmp_000168	pgaptmp_000168	adhP	protein_coding	protein_coding	pgaptmp_000168	0.4523	1017				TRUE	-3.95143	1.22589e-08	1.28939e-06	Chromosome_I	177729	178745	1017	-	9.99771	3762.1	3791.54	4838.91	2675.82	2268.03	1931.37	4299.57	4724.07	4318.27	153.368	204.996	194.522	268.07	206.448	208.158	205.623	183.748	228.877	2520.79	3875.19	3591.47	152.429	154.077	198.594	141.743	115.311	92.9562	201.297	201.852
pgaptmp_004495	pgaptmp_004495	pgaptmp_004495	protein_coding	protein_coding	pgaptmp_004495	0.4348	276				TRUE	-5.66257	1.26394e-08	1.29208e-06	Chromosome_II	1369933	1370208	276	-	8.59966	1948.12	2576.1	2635.1	2762.94	2021.56	3159.31	5244.72	3378.49	3460.39	20.18	12.6989	33.3466	29.4583	19.9789	13.1745	47.1922	54.5917	34.3977	3676.41	2527.6	2022.12	290.847	385.741	398.5	539.296	378.723	560.293	904.786	531.926
pgaptmp_003651	pgaptmp_003651	pgaptmp_003651	protein_coding	protein_coding	pgaptmp_003651	0.4517	1014				TRUE	-2.4934	1.27759e-08	1.29208e-06	Chromosome_II	408387	409400	1014	-	10.8208	2375.21	2978.32	2875.24	3263.9	3264.13	2376.69	4448.06	4369.57	4276.04	748.679	985.068	980.021	718.782	870.19	826.044	672.489	683.063	632.389	3994.38	3619.05	3728.55	96.5212	121.388	118.353	173.406	166.446	114.728	208.865	187.257
pgaptmp_002472	pgaptmp_002472	ligA	protein_coding	protein_coding	pgaptmp_002472	0.4625	2013	GO:0006260,GO:0006281	GO:0003677,GO:0003911		TRUE	3.89495	1.41307e-08	1.38348e-06	Chromosome_I	2688275	2690287	2013	-	13.0095	3001.2	2676.44	2501.14	2151.16	2550.68	1674.9	2107.09	2922.5	2708.77	35230.3	25660.7	32877.9	80756.9	81125.2	74445.4	30553.6	34804.2	34180.7	1904.43	2016.6	2781.46	61.4341	54.9483	51.8602	57.5697	65.5172	40.7266	49.8394	63.0883
pgaptmp_001522	pgaptmp_001522	pgaptmp_001522	protein_coding	protein_coding	pgaptmp_001522	0.4715	1107		GO:0016787		TRUE	-5.96655	1.42057e-08	1.38348e-06	Chromosome_I	1581392	1582498	1107	-	9.87661	11455.1	10453.1	8690.26	9017.21	7940.83	3279.71	6591.54	9599.63	9109.46	52.4681	96.1484	55.5777	64.8082	64.3763	59.2854	48.8776	82.5534	64.8265	3133.81	4754.47	6210.92	426.394	390.248	327.662	438.822	370.904	145.017	283.512	376.829
pgaptmp_001248	pgaptmp_001248	pgaptmp_001248	protein_coding	protein_coding	pgaptmp_001248	0.4848	231				TRUE	-3.52806	1.48274e-08	1.41777e-06	Chromosome_I	1334311	1334541	231	-	9.2326	2517.83	2754.77	3305.71	1764.88	1544.33	1513.27	2075.17	2162.77	2154.91	143.278	177.784	138.944	106.05	87.685	134.38	129.779	129.156	100.547	1196.41	1666.17	1575.16	449.131	492.85	597.302	411.592	345.679	320.654	427.734	406.852
pgaptmp_000214	pgaptmp_000214	pgaptmp_000214	protein_coding	protein_coding	pgaptmp_000214	0.4801	1404				TRUE	7.15259	1.54196e-08	1.44806e-06	Chromosome_I	232343	233746	1404	+	11.1355	491.849	337.085	308.762	176.808	208.915	86.5902	125.475	245.532	242.093	53073.5	33497.8	40957.1	79340	113063	90157.3	29935	33628.5	35240.5	137.467	192.422	345.605	14.4352	9.92233	9.17905	6.7842	7.69391	3.0188	4.25524	7.59938
pgaptmp_003568	pgaptmp_003568	pgaptmp_003568	protein_coding	protein_coding	pgaptmp_003568	0.4731	1095				TRUE	-5.20039	1.63313e-08	1.50678e-06	Chromosome_II	320073	321167	1095	+	9.36469	4207.7	3365.57	3476.43	4102.46	4247.94	2509.47	5803.79	8683.92	8039.75	64.5761	32.6542	42.6096	76.5915	72.1459	81.6821	47.1922	69.2383	70.1184	1796.57	2772.91	3343.9	158.339	127.024	132.514	201.834	200.59	112.176	252.366	344.619
pgaptmp_000492	pgaptmp_000492	pgaptmp_000492	protein_coding	protein_coding	pgaptmp_000492	0.4811	318				TRUE	3.19317	1.69626e-08	1.53804e-06	Chromosome_I	512944	513261	318	+	6.60846	411.673	357.327	460.693	17.937	21.8473	23.9154	40.8352	32.0908	30.9654	258.304	313.843	264.921	228.302	208.668	184.444	219.107	259.644	240.784	18.4407	21.0262	14.9541	53.3437	46.4388	60.4679	3.0387	3.55235	3.68115	6.1142	4.38522
pgaptmp_002803	pgaptmp_002803	pgaptmp_002803	protein_coding	protein_coding	pgaptmp_002803	0.4617	483				TRUE	-2.89075	1.73495e-08	1.54646e-06	Chromosome_I	3037160	3037642	483	-	10.7469	3570.91	5071.23	4992.47	5308.72	4641.19	4865.54	6803.88	5999.49	5871.47	439.925	424.504	533.546	396.214	379.598	418.95	525.856	474.016	443.201	3970.35	3735.02	3170.26	304.642	433.918	431.429	592.117	496.851	493.08	670.721	539.765
pgaptmp_004422	pgaptmp_004422	pgaptmp_004422	protein_coding	protein_coding	pgaptmp_004422	0.4558	441				TRUE	-3.5862	1.78853e-08	1.56765e-06	Chromosome_II	1292611	1293051	441	+	7.18167	422.466	633.684	655.098	862.259	862.97	460.165	683.061	705.251	744.578	20.18	25.3977	20.3785	17.675	21.0888	21.0793	20.2252	22.6356	31.7517	378.873	447.284	376.344	39.474	59.3849	62.0024	105.333	101.181	51.0749	73.7485	69.4933
pgaptmp_004891	pgaptmp_004891	pgaptmp_004891	protein_coding	protein_coding	pgaptmp_004891	0.4382	744				TRUE	-2.96177	1.87343e-08	1.61514e-06	Chromosome_II	1827660	1828403	744	+	8.9503	602.091	622.243	704.925	1176.16	1069.15	1077.84	610.3	586.59	590.454	284.538	246.721	238.984	175.277	173.15	183.126	197.196	246.329	201.094	1891.57	1520.89	1813.6	33.3463	34.5644	39.5468	85.1641	74.3039	70.9112	39.0574	34.2609
pgaptmp_003222	pgaptmp_003222	trkA	protein_coding	protein_coding	pgaptmp_003222	0.5134	1377	GO:0006813	GO:0015079	GO:0016020	TRUE	2.4162	1.99275e-08	1.6903e-06	Chromosome_I	3489500	3490876	1377	+	11.2097	1664.42	1650.22	1788.86	1050.6	1196.82	1076.19	1404.73	1542.6	1435.67	3194.5	3786.07	3951.58	5311.33	5034.67	5576.78	6613.65	6210.14	6687.71	1152.83	1176.19	1315.96	49.8067	49.5278	54.223	41.1024	44.9408	38.2551	48.5726	48.6806
pgaptmp_000502	pgaptmp_000502	pgaptmp_000502	protein_coding	protein_coding	pgaptmp_000502	0.4792	432				TRUE	3.07965	2.0375e-08	1.70083e-06	Chromosome_I	517124	517555	432	+	7.64987	418.611	266.675	351.237	36.5147	38.9156	28.8634	39.3502	32.0908	25.3353	1015.06	1442.23	1343.13	1087.01	879.07	1030.25	441.584	527.276	549.04	57.5574	43.9639	54.8316	39.9287	25.5118	33.9358	4.55353	4.65783	3.27037	4.33707	3.22801
pgaptmp_004068	pgaptmp_004068	yiaY	protein_coding	protein_coding	pgaptmp_004068	0.4708	1149		GO:0016491		TRUE	-6.1389	2.09403e-08	1.72071e-06	Chromosome_II	857422	858570	1149	-	10.8978	20758.6	16394.8	14059.3	21960.7	19590.9	6471.17	20079	30050.4	28516.3	121.08	107.033	85.2192	131.089	136.522	121.206	112.924	107.852	150.821	5830.63	9338.18	13128	744.453	589.696	510.722	1029.65	881.614	275.674	832.061	1136.5
pgaptmp_001946	pgaptmp_001946	nhaA	protein_coding	protein_coding	pgaptmp_001946	0.4728	1176	GO:0006814,GO:0006885	GO:0015385	GO:0016020	TRUE	2.9933	2.16043e-08	1.74795e-06	Chromosome_I	2100499	2101674	1176	-	11.8552	1941.18	2240.78	2525.64	1536.82	1332.69	1976.73	2136.05	2012.77	1819.92	10061.8	10331.4	10972.9	12471.2	10981.7	11907.1	8732.24	9945.02	9628.71	1328.29	1173.64	1033.49	68.017	78.7468	89.6407	70.4012	58.5956	82.276	86.4842	74.3744
pgaptmp_005157	pgaptmp_005157	pgaptmp_005157	protein_coding	protein_coding	pgaptmp_005157	0.4246	471				TRUE	-2.76655	2.28467e-08	1.82046e-06	Chromosome_II	2123963	2124433	471	-	7.64085	309.911	345.006	326.732	452.27	398.031	295.231	647.423	627.636	654.496	90.8102	76.1931	101.893	69.2269	85.4651	69.8251	47.1922	54.5917	60.8575	413.52	434.541	422.868	27.1128	30.2724	28.9542	51.7298	43.6958	30.6813	65.4485	57.9062
pgaptmp_003320	pgaptmp_003320	nagB	protein_coding	protein_coding	pgaptmp_003320	0.4682	801	GO:0006044	GO:0004342		TRUE	-2.58334	2.34724e-08	1.83128e-06	Chromosome_II	55586	56386	801	+	11.1713	1884.14	2075.32	2439.06	3695.03	3326.26	3472.68	4501.52	4047.92	4065.62	1305.65	1338.82	1374.62	1117.94	1233.14	1551.96	1090.48	1029.25	981.658	6781.72	6279.19	5677.56	96.9254	107.076	127.096	248.513	214.717	212.21	267.583	219.602
pgaptmp_003239	pgaptmp_003239	ilvD	protein_coding	protein_coding	pgaptmp_003239	0.4897	1842	GO:0009082	GO:0004160		TRUE	2.67792	2.36788e-08	1.83128e-06	Chromosome_I	3506740	3508581	1842	+	10.7818	1200.33	954.927	1077.4	636.124	693.653	687.774	814.476	986.606	971.188	2891.8	2855.43	2923.39	7726.91	7702.96	7956.1	4142.8	4788.1	5326.35	718.071	719.351	775.95	26.8515	21.4251	24.4134	18.6044	19.4714	18.2763	21.0534	23.2751
pgaptmp_003149	pgaptmp_003149	pgaptmp_003149	protein_coding	protein_coding	pgaptmp_003149	0.4701	636		GO:0032934		TRUE	2.46081	2.44755e-08	1.86546e-06	Chromosome_I	3412108	3412743	636	-	10.9961	1500.99	1312.25	1304.48	778.98	985.861	757.046	739.487	899.289	896.59	4189.38	4259.56	4244.29	6913.86	6842.76	7340.85	4990.57	5412.57	5642.55	997.476	880.551	1024.35	97.2474	85.2712	85.6093	65.9832	80.1498	58.2637	55.3613	61.444
pgaptmp_000504	pgaptmp_000504	pgaptmp_000504	protein_coding	protein_coding	pgaptmp_000504	0.4799	696				TRUE	2.95119	2.54809e-08	1.90283e-06	Chromosome_I	518130	518825	696	+	9.09359	1174.89	685.611	1015.32	118.513	120.16	103.908	132.157	123.885	125.973	2334.83	2927.99	2893.75	1985.49	1783.67	2318.72	1125.87	1404.74	1225.09	177.702	138.9	146.218	69.5576	40.7109	60.8885	9.17317	8.9268	7.30758	9.04097	7.73479
pgaptmp_004145	pgaptmp_004145	pgaptmp_004145	protein_coding	protein_coding	pgaptmp_004145	0.4605	519	GO:0033103			TRUE	-4.8302	2.56895e-08	1.90283e-06	Chromosome_II	980332	980850	519	+	7.58798	76.3214	88.8918	115.173	154.387	161.124	262.245	412.806	297.773	263.206	155.386	170.527	81.514	122.252	132.082	82.9996	67.4174	74.5643	43.6586	2552.64	1903.83	1551.07	6.0595	7.07841	9.26243	16.0253	16.0523	24.7327	37.8714	24.9319
pgaptmp_003266	pgaptmp_003266	pgaptmp_003266	protein_coding	protein_coding	pgaptmp_003266	0.4658	672	GO:0006865	GO:0042626,GO:0140359		TRUE	3.18933	2.7819e-08	2.00737e-06	Chromosome_I	3532957	3533628	672	-	10.5117	602.091	570.316	621.608	449.067	507.951	413.159	440.277	467.929	421.552	7317.28	6786.63	7008.35	5364.35	5056.87	5902.19	5499.58	6247.43	4285.16	630.897	521.195	584.87	36.9191	35.0742	38.609	36.0003	39.0837	30.0941	31.1953	30.2585
pgaptmp_003238	pgaptmp_003238	ilvE	protein_coding	protein_coding	pgaptmp_003238	0.4899	939	GO:0009081	GO:0004084		TRUE	2.66495	2.78642e-08	2.00737e-06	Chromosome_I	3505788	3506726	939	+	9.44719	483.369	362.608	425.569	256.884	263.534	270.491	286.589	372.403	365.251	1297.58	1132.01	1156.02	3219.79	3782.66	3479.4	1565.77	1914.71	1988.45	269.905	266.969	306.558	21.2115	15.9593	18.9167	14.7379	14.5116	14.1	14.532	17.2339
pgaptmp_000151	pgaptmp_000151	pgaptmp_000151	protein_coding	protein_coding	pgaptmp_000151	0.439	492				TRUE	-2.40901	2.8574e-08	2.03069e-06	Chromosome_I	158483	158974	492	-	11.8123	6473.44	9403.17	8651.06	7413.12	7587.17	9155.47	12136.2	9419.77	9858.26	958.552	905.247	876.276	1661.45	1560.57	1486.09	1193.29	1236.97	1251.55	7026.48	6531.5	6148.61	542.161	789.861	733.914	811.709	797.368	910.853	1174.49	831.98
pgaptmp_004337	pgaptmp_004337	fabV	protein_coding	protein_coding	pgaptmp_004337	0.4633	1200	GO:0006633	GO:0004318		TRUE	-3.7784	3.06531e-08	2.1494e-06	Chromosome_II	1195697	1196896	1200	-	11.293	6705.49	7238.08	7647.99	9606.57	9326.77	6061.31	10685.4	12711.7	11944.9	530.735	504.326	465	559.707	576.057	578.362	532.598	430.076	482.891	4878.97	7937.71	7407.25	230.254	249.278	266.015	431.272	401.878	247.24	423.979	460.32
pgaptmp_004023	pgaptmp_004023	pgaptmp_004023	protein_coding	protein_coding	pgaptmp_004023	0.4629	633	GO:0000160			TRUE	-2.82612	3.20429e-08	2.21729e-06	Chromosome_II	791447	792079	633	+	10.215	1749.22	2106.12	1904.85	3101.19	3228.63	2582.04	2991.36	2727.72	2833.34	472.213	598.66	565.04	491.953	517.23	487.458	288.209	387.468	298.996	2516.32	2287.39	2295.45	113.868	137.506	125.602	263.93	263.729	199.66	225.008	187.255
pgaptmp_004645	pgaptmp_004645	pgaptmp_004645	protein_coding	protein_coding	pgaptmp_004645	0.3618	1125				TRUE	-2.68833	3.32971e-08	2.25012e-06	Chromosome_II	1555266	1556390	1125	-	9.90831	2983.47	3112.09	3287.74	4232.5	4003.53	2690.89	3762.77	4009.86	4418.91	177.584	183.226	87.0718	181.168	203.118	113.301	399.448	295.594	301.642	2160.92	2236.42	2173.32	109.277	114.325	121.979	202.679	184.007	117.078	159.253	154.887
pgaptmp_000812	pgaptmp_000812	pgaptmp_000812	protein_coding	protein_coding	pgaptmp_000812	0.4511	450				TRUE	-2.68581	3.33732e-08	2.25012e-06	Chromosome_I	858278	858727	450	-	9.82293	1377.64	1622.94	1668.79	1669.43	1285.58	1483.58	1765.56	1346.32	1558.12	520.645	471.672	453.885	428.618	529.44	513.807	276.411	299.589	328.101	2265.98	1879.61	1833.53	126.148	149.049	154.785	199.857	147.717	161.373	186.811	130.009
pgaptmp_004751	pgaptmp_004751	clcA	protein_coding	protein_coding	pgaptmp_004751	0.4677	1407	GO:0006821,GO:0055085	GO:0005247	GO:0005886	TRUE	-2.55295	3.64857e-08	2.42884e-06	Chromosome_II	1670354	1671760	1407	+	11.8224	5502.85	6790.98	7477.27	7121.65	7144.76	7142.45	10473.8	9867.55	9528.9	1553.86	1863.1	1543.21	966.231	931.237	1003.9	1321.38	1431.37	1353.42	7602.05	9073.12	7595	161.158	199.471	221.814	272.678	262.565	248.477	354.442	304.756
pgaptmp_001084	pgaptmp_001084	pgaptmp_001084	protein_coding	protein_coding	pgaptmp_001084	0.4559	963				TRUE	2.73007	3.69863e-08	2.43139e-06	Chromosome_I	1152924	1153886	963	+	11.5684	1968.94	1741.75	1782.32	1124.91	1139.48	851.883	1158.23	1462.74	1372.33	5186.27	3283.56	4598.13	17040.1	18224	17444.4	9126.63	8982.34	9541.4	1262.35	1239.91	1661.56	84.2488	74.7483	77.2505	62.9296	61.1818	43.2998	57.2668	66.0054
pgaptmp_003416	pgaptmp_003416	pdxH	protein_coding	protein_coding	pgaptmp_003416	0.489	636	GO:0008615	GO:0004733,GO:0010181		TRUE	-2.45935	4.14026e-08	2.6881e-06	Chromosome_II	162625	163260	636	+	11.2115	3201.64	4258.01	4949.99	5591.23	3781.64	5750.41	9050.55	7655.52	6905.99	793.075	814.541	900.359	683.432	822.463	795.742	810.694	956.021	837.452	5100.82	4939.24	4430.56	207.431	276.688	324.854	473.603	307.445	442.563	677.565	523.064
pgaptmp_000503	pgaptmp_000503	pgaptmp_000503	protein_coding	protein_coding	pgaptmp_000503	0.5052	576				TRUE	3.04004	4.25637e-08	2.71913e-06	Chromosome_I	517552	518127	576	+	8.45478	787.112	456.781	672.252	64.7015	74.4175	61.0255	74.9882	59.7038	56.3008	1753.65	2343.85	2256.46	1796.95	1374.1	1724.55	660.691	920.071	812.315	101.703	82.8305	83.0781	56.3083	32.7738	48.7136	6.0514	6.68031	5.18587	6.19874	4.50419
pgaptmp_005220	pgaptmp_005220	pgaptmp_005220	protein_coding	protein_coding	pgaptmp_005220	0.4845	741				TRUE	-5.13299	4.32561e-08	2.71913e-06	Chromosome_II	2190804	2191544	741	-	8.75666	3761.33	3511.67	3070.47	2683.51	3100.96	2351.95	3850.38	4768.1	4544.18	28.252	14.513	31.494	32.4041	29.9683	38.2062	37.0796	30.6246	68.7954	1507.11	1952.25	2309.57	209.161	195.856	172.953	195.096	216.382	155.362	247.411	279.617
pgaptmp_002168	pgaptmp_002168	pgaptmp_002168	protein_coding	protein_coding	pgaptmp_002168	0.4489	978				TRUE	-2.32992	4.39596e-08	2.71913e-06	Chromosome_I	2351124	2352101	978	-	9.41488	1329.84	1416.11	1609.16	1010.88	966.062	795.805	1167.89	1242.59	1401.89	399.565	384.594	450.18	172.331	207.558	212.11	296.637	350.186	289.735	1517.17	1629.21	1687.32	56.0298	59.841	68.6753	55.6833	51.0752	39.8291	56.8583	55.2109
pgaptmp_004086	pgaptmp_004086	pgaptmp_004086	protein_coding	protein_coding	pgaptmp_004086	0.4694	20780				TRUE	2.31424	4.40166e-08	2.71913e-06	Chromosome_II	872625	893399	20775	+	12.1504	3049	2793.49	2617.13	3339.49	3765.94	2997.67	3674.42	4541.22	4305.6	3206.61	3149.32	3099.38	11727.3	11159.3	10219.5	11712.1	12465.6	12127.8	2396.74	2316.7	2587.88	6.04603	5.55576	5.25678	8.65763	9.37068	7.06108	8.4193	9.49652
pgaptmp_004426	pgaptmp_004426	nirB	protein_coding	protein_coding	pgaptmp_004426	0.4784	2565	GO:0042128	GO:0008942,GO:0050660,GO:0050661		TRUE	-3.90025	4.45371e-08	2.71913e-06	Chromosome_II	1295497	1298061	2565	-	10.6656	5754.17	4858.25	3825.22	6794.29	8337.49	3606.28	4602.49	8554.81	7365.55	357.187	417.248	450.18	297.529	321.882	277.983	301.693	266.301	322.809	3536.15	3971.4	6254.95	92.4386	78.2769	62.2458	142.699	168.071	68.8184	85.4355	144.931
pgaptmp_003481	pgaptmp_003481	pgaptmp_003481	protein_coding	protein_coding	pgaptmp_003481	0.4817	600				TRUE	2.65755	4.49828e-08	2.71913e-06	Chromosome_II	228154	228753	600	+	5.8884	16.1894	15.8421	21.2376	24.9837	29.3574	23.9154	20.0463	22.3889	20.409	143.278	143.316	124.124	343.189	356.29	330.681	202.252	201.057	191.833	27.9405	21.0262	22.4311	1.11183	1.0912	1.47739	2.24321	2.52994	1.95101	1.5908	1.62151
pgaptmp_001984	pgaptmp_001984	norR	protein_coding	protein_coding	pgaptmp_001984	0.4817	1530	GO:0006355	GO:0003700		TRUE	-4.56968	4.64222e-08	2.77426e-06	Chromosome_I	2144640	2146169	1530	+	9.82809	4486.77	3661.29	4404.35	3331.81	3771.4	2405.56	4173.35	4991.24	5327.46	137.224	121.546	150.06	119.306	134.302	151.507	168.544	101.194	136.268	2369.91	3587.83	4308.43	120.837	98.8972	120.152	117.315	127.454	76.9586	129.875	141.76
pgaptmp_002763	pgaptmp_002763	lspA	protein_coding	protein_coding	pgaptmp_002763	0.4576	507	GO:0006508,GO:0009306	GO:0004190	GO:0005886	TRUE	2.13626	4.71322e-08	2.78504e-06	Chromosome_I	2991182	2991688	507	-	10.9978	1110.9	1115.99	1231.78	1046.11	1033.65	1446.47	1125.57	1151.54	992.301	3955.29	3853.19	4196.12	3791.28	3184.41	3574.25	6114.76	5541.73	5387.21	1309.85	1256.47	1296.85	90.287	90.969	101.407	111.157	105.417	139.648	105.705	98.6978
pgaptmp_000209	pgaptmp_000209	groL	protein_coding	protein_coding	pgaptmp_000209	0.4693	1647	GO:0042026	GO:0140662		TRUE	3.9328	4.96736e-08	2.89219e-06	Chromosome_I	227094	228740	1647	+	14.044	7154.16	5698.76	5163.19	4135.13	5158.02	2981.18	3739.76	5531.56	5089.59	43342.7	37621.3	43209.8	199413	208312	189281	71658	87015.2	85724.4	4411.25	4699.67	6966.93	178.988	142.997	130.847	135.257	161.932	88.5986	108.114	145.946
pgaptmp_001817	pgaptmp_001817	pgaptmp_001817	protein_coding	protein_coding	pgaptmp_001817	0.4156	450		GO:0008080		TRUE	-3.97333	5.03196e-08	2.89219e-06	Chromosome_I	1946679	1947128	450	+	10.7301	5929.94	8977.19	10575.5	4464.4	4687.62	8461.92	7914.59	6339.8	5863.72	361.223	604.102	440.917	226.829	154.281	173.904	358.998	315.567	275.182	6495.05	5071.14	3715.25	542.995	824.46	980.911	534.46	538.622	920.427	837.431	612.21
pgaptmp_001083	pgaptmp_001083	tmk	protein_coding	protein_coding	pgaptmp_001083	0.466	633	GO:0006233	GO:0004798,GO:0005524		TRUE	3.76899	5.05955e-08	2.89219e-06	Chromosome_I	1152267	1152899	633	+	11.2698	1370.7	1147.67	1061.06	602.172	910.078	467.587	628.119	982.128	903.627	5382.02	4419.2	5146.5	19996.3	17724.6	17435.2	10491.8	12047.5	12809.2	681.19	751.846	1153.12	89.2272	74.93	69.9646	51.2485	74.3394	36.1569	47.2466	67.422
pgaptmp_005233	pgaptmp_005233	pgaptmp_005233	protein_coding	protein_coding	pgaptmp_005233	0.4257	303	GO:0009401	GO:0008982		TRUE	-4.45111	5.1509e-08	2.91275e-06	Chromosome_II	2210716	2211018	303	+	7.79796	708.478	822.909	860.94	1135.16	988.592	995.375	1297.82	1078.4	1227.36	18.162	16.3271	16.6733	29.4583	31.0782	26.3491	57.3048	54.5917	23.8138	1164	1143.7	1207.96	96.3478	112.241	118.596	201.826	168.701	160.797	203.94	154.659
pgaptmp_000497	pgaptmp_000497	pgaptmp_000497	protein_coding	protein_coding	pgaptmp_000497	0.485	831				TRUE	3.26533	5.32379e-08	2.94987e-06	Chromosome_I	515254	516084	831	+	10.6803	5281.59	4084.62	5583.86	366.428	407.589	318.322	520.463	544.051	578.49	5369.91	7078.7	6150.6	4440.83	3862.58	5192.09	3156.82	3686.94	3475.49	446.489	303.924	299.081	261.892	203.139	280.462	23.7548	25.361	18.7499	29.8209	28.4496
pgaptmp_005218	pgaptmp_005218	pgaptmp_005218	protein_coding	protein_coding	pgaptmp_005218	0.4747	1125				TRUE	-3.17075	5.37053e-08	2.94987e-06	Chromosome_II	2189203	2190327	1125	-	9.50029	3441.4	2670.27	2247.92	2252.38	2469.43	1442.35	2332.8	4390.47	3667.29	183.638	145.13	138.944	179.695	149.841	179.174	144.947	143.803	164.051	1078.5	1530.45	1707.26	126.049	98.0946	83.4006	107.858	113.498	62.7552	98.732	169.588
pgaptmp_002861	pgaptmp_002861	parE	protein_coding	protein_coding	pgaptmp_002861	0.4923	1881	GO:0006265	GO:0003677,GO:0003918,GO:0005524	GO:0005694	TRUE	3.83564	5.43158e-08	2.94987e-06	Chromosome_I	3109669	3111549	1881	-	12.535	3888.53	3034.64	3079.45	1507.99	2058.43	1658.41	1674.98	2226.21	2356.19	11744.8	12205.4	13190.4	26754	23537.3	27706.1	26456.3	27262.6	41176.7	2063.69	2070.12	2520.59	85.1835	66.6746	68.3322	43.1891	56.5837	43.1554	42.3989	51.4297
pgaptmp_001915	pgaptmp_001915	pgaptmp_001915	protein_coding	protein_coding	pgaptmp_001915	0.4364	825				TRUE	-2.05476	5.49524e-08	2.94987e-06	Chromosome_I	2060672	2061496	825	+	11.1679	3398.23	3913	4368.41	3233.79	2514.49	2956.44	3949.87	3418.79	3599.03	1727.41	1491.21	1652.51	1154.76	1631.61	1631.01	884.854	940.043	931.384	3995.49	3787.9	3780.89	169.729	196.019	221.009	211.165	157.594	175.407	227.962	180.076
pgaptmp_000494	pgaptmp_000494	pgaptmp_000494	protein_coding	protein_coding	pgaptmp_000494	0.4958	474				TRUE	3.30449	5.49701e-08	2.94987e-06	Chromosome_I	513771	514244	474	+	6.53592	358.479	220.029	282.623	21.1401	21.1646	18.9674	19.3039	34.3297	26.0391	234.088	362.824	363.108	344.662	206.448	255.586	207.309	291.6	242.107	13.9703	15.2918	22.4311	31.1633	19.1842	24.8869	2.40266	2.30874	1.95867	1.9391	3.14723
pgaptmp_001111	pgaptmp_001111	pgaptmp_001111	protein_coding	protein_coding	pgaptmp_001111	0.4779	768				TRUE	-3.7245	5.62877e-08	2.99007e-06	Chromosome_I	1183819	1184586	768	-	8.42431	2207.15	1596.53	1413.12	921.195	955.821	550.879	927.329	1522.45	1430.04	50.4501	90.7061	38.9044	98.6852	91.0148	115.936	65.732	62.5808	56.8885	735.953	787.526	1269.43	118.421	85.9128	76.7994	64.6182	64.3516	35.1097	57.4917	86.1427
pgaptmp_004610	pgaptmp_004610	pgaptmp_004610	protein_coding	protein_coding	pgaptmp_004610	0.4704	3378				TRUE	2.66968	5.71896e-08	3.0076e-06	Chromosome_II	1507690	1511067	3378	-	11.2473	1958.91	1471.56	1686.76	1155.02	1514.29	1164.43	1558.42	1990.38	1881.15	3456.84	3956.6	2908.57	7221.7	7102.48	5479.29	6182.18	6686.82	5471.88	837.098	894.569	1140.66	23.8954	18.0036	20.8417	18.4201	23.179	16.8728	21.9663	25.6043
pgaptmp_001940	pgaptmp_001940	pgaptmp_001940	protein_coding	protein_coding	pgaptmp_001940	0.4689	1239		GO:0030554,GO:0046872		TRUE	-2.40534	5.88187e-08	3.06265e-06	Chromosome_I	2091836	2093074	1239	-	8.81117	1325.22	1252.41	1163.98	995.506	1020	557.476	867.19	969.441	1020.45	171.53	143.316	148.207	148.764	195.349	125.158	190.454	166.438	148.175	890.743	999.063	901.398	44.0731	41.7749	39.2118	43.2849	42.5669	22.0236	33.3254	34.0007
pgaptmp_005302	pgaptmp_005302	pgaptmp_005302	protein_coding	protein_coding	pgaptmp_005302	0.4884	774				TRUE	-2.26108	6.21524e-08	3.2045e-06	Chromosome_II	2288747	2289520	774	+	9.4936	854.953	920.602	960.593	1219.08	1186.58	1005.27	1654.19	1611.26	1629.91	304.719	402.735	351.992	435.982	385.148	379.427	269.67	284.942	326.778	1354.56	1433.6	1557.72	45.5155	49.1556	51.8012	84.8506	79.2686	63.5733	101.76	90.461
pgaptmp_002805	pgaptmp_002805	arcA	protein_coding	protein_coding	pgaptmp_002805	0.4658	717				TRUE	-2.46087	6.35472e-08	3.24461e-06	Chromosome_I	3038466	3039182	717	+	14.1415	27731.6	33533.3	35697.1	37423.7	33685.9	24448.1	36791	36596.2	37119.1	9014.42	9433.43	8701.62	7894.82	9274.63	9349.97	6236.11	6180.85	6204.82	33281.1	35894.9	33674.1	1593.73	1932.85	2078.05	2811.85	2429.25	1669.01	2443.18	2217.96
pgaptmp_003141	pgaptmp_003141	polA	protein_coding	protein_coding	pgaptmp_003141	0.4744	2793	GO:0006261	GO:0003676,GO:0003677,GO:0003887,GO:0008408		TRUE	4.06727	6.64239e-08	3.35888e-06	Chromosome_I	3402327	3405119	2793	-	13.9679	9798.43	7424.67	6708.63	4654.02	6151.39	3724.2	4441.38	7290.58	6698.38	21978.1	18814.3	22666.5	102154	90950.4	99506	88921.9	90730.1	121976	4682.83	5871.4	7516.08	144.559	109.862	100.255	89.768	113.88	65.2672	75.7146	113.43
pgaptmp_004890	pgaptmp_004890	pgaptmp_004890	protein_coding	protein_coding	pgaptmp_004890	0.4154	2340				TRUE	-2.40967	6.83789e-08	3.4248e-06	Chromosome_II	1824801	1827140	2340	-	11.0638	3153.07	2970.39	3187.27	3862.87	3795.29	2789.03	1554.71	1861.27	1824.85	1598.26	2289.42	1495.04	830.723	840.222	725.917	1250.59	1351.48	1041.19	6598.43	6002.66	6926.23	55.5235	52.4614	56.8518	88.9321	83.8636	58.3405	31.6348	34.5645
pgaptmp_002120	pgaptmp_002120	pgaptmp_002120	protein_coding	protein_coding	pgaptmp_002120	0.4931	1515				TRUE	2.52688	6.96209e-08	3.44372e-06	Chromosome_I	2304923	2306437	1515	-	8.0843	220.484	185.705	202.574	87.7634	130.401	103.908	114.338	138.065	145.678	573.113	531.538	666.933	969.177	1014.48	1152.77	598.33	597.846	641.65	92.7625	85.3791	120.463	5.99684	5.06584	5.581	3.12079	4.45055	3.35715	3.59346	3.96012
pgaptmp_002129	pgaptmp_002129	pgaptmp_002129	protein_coding	protein_coding	pgaptmp_002129	0.4655	333				TRUE	-3.64096	7.00662e-08	3.44372e-06	Chromosome_I	2314858	2315190	333	-	7.07487	214.317	266.675	269.554	500.956	345.461	294.407	507.841	286.578	331.471	34.3061	36.2824	31.494	22.0937	32.1882	23.7142	40.4505	46.6027	37.0437	735.953	435.178	695.364	26.5198	33.0964	33.7865	81.0437	53.6412	43.2749	72.6133	37.397
pgaptmp_003100	pgaptmp_003100	pgaptmp_003100	protein_coding	protein_coding	pgaptmp_003100	0.5069	2322		GO:0003676,GO:0003729	GO:0005829	TRUE	3.03857	7.11264e-08	3.4573e-06	Chromosome_I	3356864	3359185	2322	+	11.65	1745.37	1496.2	1493.17	978.85	1015.9	971.46	1018.65	1203.78	1233.69	7418.18	6688.67	7730.86	22051	21101	21442.9	8659.77	10218	11962.5	1106.44	1149.43	1494.58	30.973	26.6298	26.8403	22.7101	22.6221	20.4784	20.888	22.528
pgaptmp_002651	pgaptmp_002651	pgaptmp_002651	protein_coding	protein_coding	pgaptmp_002651	0.4687	894	GO:0006355	GO:0003700		TRUE	-2.30367	7.16572e-08	3.4573e-06	Chromosome_I	2868822	2869715	894	+	9.65725	1733.03	2253.1	2611.41	1455.46	1437.83	1627.07	2520.64	2411.29	2232.33	238.124	239.464	259.363	279.854	276.374	283.253	273.041	294.263	291.058	1465.76	1594.17	1291.03	79.8781	104.156	121.921	87.7057	83.1598	89.0844	134.248	117.206
pgaptmp_003841	pgaptmp_003841	pgaptmp_003841	protein_coding	protein_coding	pgaptmp_003841	0.4281	1488				TRUE	2.39616	7.24041e-08	3.46157e-06	Chromosome_II	607841	609328	1488	-	8.99785	317.62	409.254	369.208	518.893	450.601	448.62	343.015	256.726	307.543	645.761	520.653	605.797	677.54	910.148	959.106	1390.48	1236.97	1534.67	285.552	244.031	240.096	8.79556	11.3666	10.3564	18.7862	15.6579	14.7573	10.976	7.4973
pgaptmp_001706	pgaptmp_001706	uspE	protein_coding	protein_coding	pgaptmp_001706	0.443	948				TRUE	-3.16653	7.44038e-08	3.52513e-06	Chromosome_I	1802536	1803483	948	+	13.3387	30548.6	42109.2	45392.9	25689.7	22591.5	30011.3	43875.5	37438	34856.5	2300.52	2421.85	2426.89	2886.91	2851.43	2774.56	2332.64	2226.28	2473.99	25490.7	20866.3	17027.7	1327.83	1835.74	1998.58	1459.87	1232.2	1549.57	2203.67	1716.1
pgaptmp_003172	pgaptmp_003172	pgaptmp_003172	protein_coding	protein_coding	pgaptmp_003172	0.4401	609				TRUE	2.80655	7.51938e-08	3.53075e-06	Chromosome_I	3439744	3440352	609	-	9.30821	308.369	336.205	267.921	221.651	294.939	330.692	251.693	250.756	254.761	1202.73	1244.49	1235.68	1415.47	1046.67	1140.92	2821.42	2597.77	3769.2	462.136	414.152	417.052	20.8647	22.8154	18.3624	19.6072	25.0414	26.579	19.6783	17.8925
pgaptmp_004892	pgaptmp_004892	pgaptmp_004892	protein_coding	protein_coding	pgaptmp_004892	0.4308	1344				TRUE	-2.2541	7.66446e-08	3.56703e-06	Chromosome_II	1828406	1829749	1344	+	9.30833	768.61	789.465	853.588	1302.36	1189.31	773.539	590.254	644.055	649.57	371.313	520.653	333.466	243.031	306.342	274.03	358.998	394.126	381.021	1799.93	1619.02	2118.49	23.5649	24.2759	26.5088	52.203	45.7553	28.1719	20.9109	20.8239
pgaptmp_004894	pgaptmp_004894	pgaptmp_004894	protein_coding	protein_coding	pgaptmp_004894	0.4167	408		GO:0022857	GO:0016020	TRUE	-2.62937	7.95402e-08	3.61025e-06	Chromosome_II	1830245	1830652	408	+	7.33661	229.735	183.064	189.505	320.304	347.509	229.258	124.733	167.171	152.012	151.35	146.944	133.387	66.2811	78.8055	80.3647	70.7883	70.5698	55.5655	459.342	388.029	514.254	23.202	18.5432	19.3866	42.2928	44.0403	27.5041	14.5564	17.8048
pgaptmp_001449	pgaptmp_001449	pgaptmp_001449	protein_coding	protein_coding	pgaptmp_001449	0.3953	339				TRUE	-2.63391	7.96812e-08	3.61025e-06	Chromosome_I	1503312	1503650	339	-	6.65072	154.955	214.749	185.421	205.635	228.714	159.161	216.055	214.187	242.093	32.2881	54.4236	44.4622	64.8082	57.7167	50.0632	23.5961	27.9616	21.1678	186.084	217.271	190.249	18.835	26.1801	22.8296	32.6785	34.8849	22.981	30.3457	27.4557
pgaptmp_004064	pgaptmp_004064	pgaptmp_004064	protein_coding	protein_coding	pgaptmp_004064	0.4292	480		GO:0008199,GO:0016491		TRUE	-2.4007	7.97114e-08	3.61025e-06	Chromosome_II	853845	854324	480	+	10.3008	6644.58	7422.03	9069.27	3074.28	2228.43	3142.81	10862.2	7707.76	8546.46	284.538	272.118	224.164	197.37	166.49	155.46	365.74	342.197	288.412	1902.19	1871.33	1602.58	570.407	639.032	788.628	345.038	240.05	320.487	1077.48	697.79
pgaptmp_001012	pgaptmp_001012	adhE	protein_coding	protein_coding	pgaptmp_001012	0.4543	2703	GO:0006066,GO:0015976	GO:0004022,GO:0016620,GO:0046872		TRUE	-4.00287	8.07956e-08	3.61025e-06	Chromosome_I	1072584	1075286	2703	+	15.29	212463	206312	145663	151921	185899	59771.2	128739	248335	213228	7414.14	8539.07	7603.03	6578.03	6745.08	6167	7090.63	6939.81	7115.04	82781.6	106374	152222	3238.89	3154.42	2249.28	3027.86	3556.11	1082.38	2267.76	3992.36
pgaptmp_000531	pgaptmp_000531	pgaptmp_000531	protein_coding	protein_coding	pgaptmp_000531	0.4714	630				TRUE	4.80424	8.10059e-08	3.61025e-06	Chromosome_I	540469	541098	630	-	8.68224	169.603	212.108	211.559	133.247	133.132	178.128	149.976	100.004	109.083	663.923	832.682	791.056	895.532	627.114	677.171	7464.79	5951.83	3521.8	230.789	191.147	156.187	11.0931	13.9142	14.0163	11.3941	10.9266	13.8397	11.3348	6.89785
pgaptmp_004827	pgaptmp_004827	pgaptmp_004827	protein_coding	protein_coding	pgaptmp_004827	0.4612	618				TRUE	-2.11917	8.59082e-08	3.79657e-06	Chromosome_II	1754057	1754674	618	+	9.45485	734.689	884.517	936.088	1015.36	953.09	902.187	1473.04	1361.99	1305.47	431.853	426.319	363.108	546.451	614.905	641.6	251.13	255.649	277.828	1156.18	1252.01	1098.29	48.9862	59.1507	63.2221	88.5111	79.7424	71.4564	113.49	95.7688
pgaptmp_001902	pgaptmp_001902	pgaptmp_001902	protein_coding	protein_coding	pgaptmp_001902	0.4658	1419				TRUE	-2.69014	8.72847e-08	3.82525e-06	Chromosome_I	2044847	2046265	1419	-	8.78998	2850.1	2921.99	2651.43	1336.31	1238.47	1205.67	2472.38	2544.88	2289.33	72.6481	65.3084	77.8088	79.5373	78.8055	80.3647	101.126	81.2219	109.808	591.78	765.863	678.748	82.763	85.1016	77.99	50.7328	45.1281	41.5889	82.9595	77.933
pgaptmp_001899	pgaptmp_001899	pgaptmp_001899	protein_coding	protein_coding	pgaptmp_001899	0.4429	1707				TRUE	-2.0589	9.34853e-08	4.05091e-06	Chromosome_I	2041254	2042960	1707	+	11.811	9849.31	10269.2	9857.51	6660.41	6448.38	4205.81	7037.01	9243.65	8103.79	1715.3	1681.69	1754.4	1736.57	1650.48	1663.94	1105.65	1143.76	1293.88	4767.21	4987.03	5142.54	237.755	248.625	241.032	210.199	195.326	120.6	196.285	235.314
pgaptmp_005254	pgaptmp_005254	pgaptmp_005254	protein_coding	protein_coding	pgaptmp_005254	0.4536	183		GO:0003677		TRUE	-4.00322	9.39743e-08	4.05091e-06	Chromosome_II	2233013	2233195	183	-	7.63913	506.496	462.061	551.361	506.081	436.264	423.055	670.439	733.611	791.026	76.6841	79.8213	62.9881	58.9165	51.0571	65.8727	15.1689	39.9452	31.7517	568.869	662.644	596.501	114.047	104.349	125.755	148.982	123.266	113.156	174.438	174.202
pgaptmp_005219	pgaptmp_005219	pgaptmp_005219	protein_coding	protein_coding	pgaptmp_005219	0.4808	468				TRUE	-4.85396	9.57828e-08	4.0953e-06	Chromosome_II	2190337	2190804	468	-	8.11879	2618.05	1901.93	1694.11	1468.92	1774.41	757.87	1521.3	3108.33	2739.03	14.126	30.8401	27.7889	39.7687	27.7484	48.7458	18.5398	27.9616	26.4598	568.31	1105.47	1227.06	230.511	167.954	151.09	169.089	196.044	79.2651	154.775	288.615
pgaptmp_004548	pgaptmp_004548	pgaptmp_004548	protein_coding	protein_coding	pgaptmp_004548	0.4313	1776	GO:0009966	GO:0009975		TRUE	-1.93815	9.73521e-08	4.12883e-06	Chromosome_II	1431842	1433617	1776	+	11.0215	2157.04	2345.51	2406.38	4051.85	3773.45	3042.2	3370.76	3744.18	3635.62	1354.08	1128.38	1309.78	1050.19	1425.16	1333.26	1029.8	950.695	899.633	3730.06	3508.19	3900.52	50.0465	54.5803	56.5539	122.906	109.86	83.8451	90.3685	91.6117
pgaptmp_001818	pgaptmp_001818	pgaptmp_001818	protein_coding	protein_coding	pgaptmp_001818	0.4386	399		GO:0046872		TRUE	-2.53825	9.99155e-08	4.18561e-06	Chromosome_I	1947287	1947685	399	-	8.24406	1177.97	1300.81	1360.02	945.538	758.512	1038.26	1579.21	980.635	1182.32	48.4321	43.5389	44.4622	50.0791	58.8266	46.1109	101.126	125.162	87.3173	680.631	649.9	625.578	121.652	134.736	142.27	127.665	98.2955	127.369	188.451	106.8
pgaptmp_002804	pgaptmp_002804	pgaptmp_002804	protein_coding	protein_coding	pgaptmp_002804	0.4167	408				TRUE	-3.02641	1.01782e-07	4.18561e-06	Chromosome_I	3037697	3038104	408	-	11.0649	4007.26	5042.19	5302.87	6208.14	4736.09	4707.21	7453.53	5544.25	6620.97	744.643	700.251	703.985	391.795	574.947	548.061	835.976	637.791	537.134	6305.06	5292.87	4963.09	404.711	510.741	542.49	819.72	600.211	564.724	869.83	590.5
pgaptmp_004609	pgaptmp_004609	pgaptmp_004609	protein_coding	protein_coding	pgaptmp_004609	0.469	6198		GO:0003676,GO:0005524		TRUE	2.56767	1.02394e-07	4.18561e-06	Chromosome_II	1501476	1507673	6198	-	11.8552	3200.1	2395.68	2516.66	1774.49	2184.73	1849.73	2551.83	3493.42	3294.3	5018.77	5121.27	4281.34	9563.63	9465.54	6834.95	9684.51	9799.88	8680.13	1305.94	1554.66	1887.54	21.275	15.9742	16.9478	15.4236	18.226	14.608	19.6034	24.4927
pgaptmp_002420	pgaptmp_002420	pgaptmp_002420	protein_coding	protein_coding	pgaptmp_002420	0.4386	228				TRUE	-2.42409	1.02472e-07	4.18561e-06	Chromosome_I	2631524	2631751	228	-	10.0235	1440.08	1654.62	1635.3	2194.08	1814.01	1691.4	1983.1	1697.08	1842.44	770.877	821.797	765.12	368.228	380.708	339.903	380.908	435.402	366.468	2007.8	1900.64	2588.72	260.262	299.92	299.366	518.421	411.386	363.114	414.136	323.449
pgaptmp_001931	pgaptmp_001931	pgaptmp_001931	protein_coding	protein_coding	pgaptmp_001931	0.4534	1941				TRUE	-3.16545	1.02804e-07	4.18561e-06	Chromosome_I	2081828	2083768	1941	+	9.39462	3222.46	2890.3	2728.22	2158.85	1966.26	1128.97	2503.57	2896.38	2857.97	98.8822	154.2	124.124	163.493	175.37	146.237	131.464	133.151	203.74	1292.53	1475.66	1679.01	68.41	61.5403	58.667	59.9186	52.3793	28.4702	61.4138	64.8437
pgaptmp_000592	pgaptmp_000592	pgaptmp_000592	protein_coding	protein_coding	pgaptmp_000592	0.5031	1131				TRUE	2.14453	1.03466e-07	4.18561e-06	Chromosome_I	595921	597051	1131	+	9.40854	606.716	543.912	571.782	354.257	403.493	473.36	455.869	523.155	477.149	730.517	879.849	863.307	1676.18	1223.15	1266.07	1532.06	1434.03	1623.31	296.728	367.003	356.405	22.1045	19.875	21.1013	16.8741	18.4466	20.4862	19.1915	20.1004
pgaptmp_000983	pgaptmp_000983	pgaptmp_000983	protein_coding	protein_coding	pgaptmp_000983	0.4652	948				TRUE	-1.93899	1.07104e-07	4.29969e-06	Chromosome_I	1039617	1040564	948	-	9.72985	794.821	858.114	893.613	1544.51	1426.22	1167.73	683.061	664.205	593.973	736.571	823.611	629.881	425.672	602.695	578.362	542.71	525.945	523.904	2017.3	1894.27	2292.13	34.5477	37.4092	39.3443	87.7699	77.7898	60.293	34.3071	30.4461
pgaptmp_004846	pgaptmp_004846	pgaptmp_004846	protein_coding	protein_coding	pgaptmp_004846	0.4674	537				TRUE	-2.70941	1.15355e-07	4.57139e-06	Chromosome_II	1771200	1771736	537	-	10.0502	1999	1904.57	1743.93	2167.82	2459.19	1086.91	2128.63	2704.58	2616.58	492.393	694.809	590.977	471.332	506.131	480.871	261.243	295.594	366.468	1741.81	2203.93	2275.51	153.39	146.577	135.549	217.477	236.789	99.0726	188.737	218.859
pgaptmp_002104	pgaptmp_002104	pgaptmp_002104	protein_coding	protein_coding	pgaptmp_002104	0.437	810		GO:0003824,GO:0016787		TRUE	-1.97227	1.15679e-07	4.57139e-06	Chromosome_I	2283604	2284413	810	+	9.22804	1016.85	1067.58	1111.71	845.603	856.143	769.416	876.842	808.987	784.692	498.447	506.14	494.642	318.149	381.818	370.205	225.848	238.34	227.554	993.564	912.409	893.09	51.7284	54.47	57.2857	56.2401	54.6519	46.4953	51.5429	43.4004
pgaptmp_000632	pgaptmp_000632	sfsA	protein_coding	protein_coding	pgaptmp_000632	0.4393	717		GO:0003677		TRUE	-2.1481	1.1706e-07	4.57139e-06	Chromosome_I	638943	639659	717	-	10.6498	2480.83	2660.59	2716.78	2001.9	1766.9	1714.49	2642.41	2253.82	2515.24	1525.61	1302.54	1254.2	1188.64	1731.5	1600.71	487.091	560.564	477.599	2517.44	2069.49	2284.65	142.573	153.356	158.153	150.414	127.42	117.044	175.474	136.596
pgaptmp_002128	pgaptmp_002128	nikA	protein_coding	protein_coding	pgaptmp_002128	0.4707	1587	GO:0015675	GO:0015413,GO:0016151	GO:0009897,GO:0030288,GO:0055052	TRUE	-2.23723	1.17349e-07	4.57139e-06	Chromosome_I	2312990	2314576	1587	-	8.29237	373.127	434.778	504.801	965.397	826.785	541.807	729.093	715.7	633.384	94.8462	137.873	125.976	88.3748	98.7843	106.714	158.431	142.471	148.175	824.804	733.368	659.64	9.68808	11.3222	13.2765	32.7713	26.9377	16.7109	21.8745	19.5971
pgaptmp_001716	pgaptmp_001716	cobB	protein_coding	protein_coding	pgaptmp_001716	0.4495	732		GO:0070403		TRUE	-2.02608	1.25179e-07	4.81583e-06	Chromosome_I	1812993	1813724	732	-	9.26301	1299.78	1542.84	1768.44	1283.14	1116.95	1198.24	2057.35	1691.86	1747.43	199.782	221.323	220.458	145.818	234.197	193.666	220.792	242.334	259.306	998.035	1053.22	983.645	73.1671	87.107	100.837	94.4337	78.8978	80.1248	133.823	100.436
pgaptmp_004736	pgaptmp_004736	cpaB	protein_coding	protein_coding	pgaptmp_004736	0.4436	825				TRUE	-2.53277	1.25455e-07	4.81583e-06	Chromosome_II	1653242	1654066	825	-	9.14925	129.515	139.058	159.282	1064.05	1075.98	1067.12	1015.68	1036.61	1057.75	490.375	580.519	761.415	399.16	369.609	557.283	279.782	258.312	296.35	1973.16	1362.88	1633.32	6.46881	6.96603	8.05849	69.4821	67.4365	63.313	58.6187	54.6007
pgaptmp_004349	pgaptmp_004349	pgaptmp_004349	protein_coding	protein_coding	pgaptmp_004349	0.4246	2082	GO:0055085	GO:0022857	GO:0019867	TRUE	-1.96262	1.26891e-07	4.83563e-06	Chromosome_II	1212069	1214150	2082	-	10.5129	1024.56	1211.04	1320	4805.85	3970.07	3678.02	2001.66	1878.43	1848.07	938.372	1195.51	779.941	530.249	632.664	501.95	921.933	849.501	801.731	3631.71	3148.19	3343.9	20.2774	24.0392	26.4627	124.352	98.5965	86.4702	45.7766	39.206
pgaptmp_003408	pgaptmp_003408	pgaptmp_003408	protein_coding	protein_coding	pgaptmp_003408	0.4803	585		GO:0009055,GO:0010181		TRUE	2.64613	1.27976e-07	4.84191e-06	Chromosome_II	151280	151864	585	-	7.71783	109.471	113.535	93.1187	112.106	104.458	121.226	99.4893	82.8391	99.9338	443.961	776.444	529.841	427.145	354.07	372.839	586.532	853.495	668.109	94.4389	108.317	112.986	7.71084	8.02077	6.64388	10.3238	9.23269	10.1432	8.09754	6.15342
pgaptmp_000684	pgaptmp_000684	vmrA	protein_coding	protein_coding	pgaptmp_000684	0.4677	1347				TRUE	2.12164	1.29348e-07	4.85887e-06	Chromosome_I	708800	710146	1347	+	10.0483	736.231	783.304	741.682	532.986	645.862	644.891	562.783	604.501	576.379	1632.56	2135.22	1867.41	1820.52	1409.62	1495.31	2937.71	3034.5	2742.56	597.927	750.571	636.379	22.5219	24.0328	22.9822	21.3163	24.7923	23.4343	19.8933	19.5015
pgaptmp_002391	pgaptmp_002391	pgaptmp_002391	protein_coding	protein_coding	pgaptmp_002391	0.4538	465				TRUE	3.20228	1.30381e-07	4.86294e-06	Chromosome_I	2603410	2603874	465	+	10.2188	809.469	725.216	731.064	304.289	357.75	267.193	468.491	650.772	610.159	2405.46	1970.14	2163.83	6237.79	6096.88	7073.41	3660.77	3929.27	4944.01	354.844	410.966	581.547	71.7308	64.4549	65.621	35.2531	39.7806	28.1258	47.9712	60.8153
pgaptmp_004873	pgaptmp_004873	pgaptmp_004873	protein_coding	protein_coding	pgaptmp_004873	0.5024	414				TRUE	-2.45127	1.38249e-07	5.08463e-06	Chromosome_II	1803311	1803724	414	+	6.43401	100.991	117.056	67.797	146.699	128.353	98.9602	148.491	117.169	104.156	68.6121	45.353	42.6096	51.552	66.5962	64.5552	28.6524	39.9452	33.0747	232.465	207.076	242.588	10.0517	11.6851	6.83519	19.0894	16.0306	11.7002	17.0779	12.2984
pgaptmp_001663	pgaptmp_001663	pgaptmp_001663	protein_coding	protein_coding	pgaptmp_001663	0.443	921				TRUE	-2.11852	1.38281e-07	5.08463e-06	Chromosome_I	1749593	1750513	921	+	9.79734	1705.28	1949.46	2060.86	1465.07	1478.79	1441.52	2001.66	1789.62	1934.63	460.105	475.3	407.57	446.293	415.116	345.173	332.031	358.175	280.474	1455.7	1487.13	1368.3	76.2947	87.4774	93.3965	85.6966	83.0216	76.6115	103.482	84.4382
pgaptmp_004646	pgaptmp_004646	pgaptmp_004646	protein_coding	protein_coding	pgaptmp_004646	0.3958	960				TRUE	-3.31825	1.39593e-07	5.08463e-06	Chromosome_II	1556390	1557349	960	-	10.4944	4957.03	5706.68	5807.67	6422.1	6206.69	4931.52	7291.67	6753.25	7476.04	254.268	243.092	125.976	219.464	209.778	227.92	495.518	312.904	280.474	3752.97	3951.01	3368.82	212.769	245.671	252.506	360.388	334.297	251.445	361.65	305.688
pgaptmp_000761	pgaptmp_000761	recD	protein_coding	protein_coding	pgaptmp_000761	0.4894	2160	GO:0006302,GO:0006310	GO:0004386,GO:0008854	GO:0009338	TRUE	2.04244	1.40192e-07	5.08463e-06	Chromosome_I	806703	808862	2160	+	10.9797	1818.61	1578.93	1609.97	1085.83	1232.33	1036.61	1145.61	1442.59	1399.78	2088.63	2487.16	2699.23	4063.77	3567.34	3758.7	4914.73	4575.05	5569.78	1146.12	1192.12	1309.31	34.6931	30.21	31.1104	27.0815	29.4996	23.4906	25.2532	29.022
pgaptmp_000758	pgaptmp_000758	pgaptmp_000758	protein_coding	protein_coding	pgaptmp_000758	0.4359	1824				TRUE	-1.97893	1.48038e-07	5.3324e-06	Chromosome_I	796793	798616	1824	-	9.68294	1544.16	1800.72	1780.69	1140.92	1161.32	1101.76	1699.48	1579.91	1620.05	429.835	542.422	431.654	369.701	409.567	447.934	330.345	336.871	301.642	1249.5	1418.31	1236.2	34.8839	40.8002	40.7479	33.6974	32.9209	29.5661	44.3634	37.6397
pgaptmp_002672	pgaptmp_002672	pgaptmp_002672	protein_coding	protein_coding	pgaptmp_002672	0.4587	1524			GO:0016020	TRUE	-2.1226	1.57669e-07	5.60835e-06	Chromosome_I	2893073	2894596	1524	-	11.5118	15318.2	20098.3	22140.2	17869.1	16066	21691.3	29606.2	28362.3	25291	484.321	513.396	509.463	391.795	341.86	345.173	487.091	532.602	433.94	2119.57	2341.55	1967.29	414.173	545.026	606.37	631.659	545.088	696.679	924.977	808.712
pgaptmp_002191	pgaptmp_002191	pgaptmp_002191	protein_coding	protein_coding	pgaptmp_002191	0.4429	420				TRUE	-2.38841	1.57831e-07	5.60835e-06	Chromosome_I	2372352	2372771	420	-	8.08415	546.584	743.699	706.559	481.097	375.501	473.36	663.757	494.049	506.707	127.134	88.892	85.2192	125.198	124.313	125.158	111.239	93.2054	88.6403	602.956	567.07	475.207	53.6248	73.1795	70.2166	61.7089	46.2281	55.1664	75.2476	51.1162
pgaptmp_004893	pgaptmp_004893	pgaptmp_004893	protein_coding	protein_coding	pgaptmp_004893	0.4464	513	GO:0015031		GO:0005886	TRUE	-2.41527	1.59544e-07	5.63116e-06	Chromosome_II	1829743	1830255	513	+	7.951	324.558	311.561	334.084	492.628	451.967	294.407	266.542	280.608	259.687	171.53	214.066	179.701	98.6852	129.863	105.396	119.666	111.846	116.423	759.423	532.026	686.225	26.0696	25.0997	27.1818	51.7328	45.5547	28.0907	24.739	23.7695
pgaptmp_000078	pgaptmp_000078	yigB	protein_coding	protein_coding	pgaptmp_000078	0.4854	717				TRUE	2.38813	1.69647e-07	5.94781e-06	Chromosome_I	84960	85676	717	+	9.01717	398.567	346.766	372.475	235.103	264.899	220.187	208.631	231.352	218.165	712.355	896.176	861.455	1421.36	1368.55	1570.4	1253.96	1480.63	1812.49	279.964	277.801	292.435	22.9055	19.9875	21.683	17.6646	19.1032	15.0316	13.8545	14.0214
pgaptmp_003663	pgaptmp_003663	pgaptmp_003663	protein_coding	protein_coding	pgaptmp_003663	0.4481	183				TRUE	-2.89067	1.71058e-07	5.95759e-06	Chromosome_II	423274	423456	183	-	11.0119	2234.13	3384.05	2611.41	5375.99	4150.31	5648.16	9591.81	4563.61	6036.85	984.786	977.812	942.969	287.218	477.273	393.919	1011.26	713.687	755.427	6037.94	5017.61	7567.59	503.056	764.236	595.614	1582.6	1172.66	1510.74	2495.64	1083.66
pgaptmp_001641	pgaptmp_001641	pgaptmp_001641	protein_coding	protein_coding	pgaptmp_001641	0.4513	483	GO:0006355	GO:0003700		TRUE	-2.15144	1.75412e-07	6.026e-06	Chromosome_I	1716606	1717088	483	+	8.94076	729.293	818.509	905.049	729.653	686.143	813.123	1000.83	766.448	901.516	290.593	355.568	379.781	326.987	360.729	335.951	131.464	169.101	161.405	677.278	708.519	771.796	62.2176	70.0354	78.2106	81.383	73.4533	82.4028	98.6613	68.9561
pgaptmp_001451	pgaptmp_001451	pgaptmp_001451	protein_coding	protein_coding	pgaptmp_001451	0.3295	261				TRUE	-2.7901	1.76603e-07	6.026e-06	Chromosome_I	1504024	1504284	261	-	6.54548	147.246	173.383	159.282	169.761	268.995	191.323	213.828	220.904	232.241	60.5401	79.8213	25.9363	79.5373	36.6279	31.6189	13.4835	25.2986	17.1989	178.26	181.59	193.572	23.2467	27.4541	25.4722	35.0399	53.2903	35.8806	39.0082	36.7791
pgaptmp_001082	pgaptmp_001082	mltG	protein_coding	protein_coding	pgaptmp_001082	0.4405	1017	GO:0009252,GO:0071555	GO:0008932		TRUE	3.13972	1.78257e-07	6.026e-06	Chromosome_I	1151254	1152270	1017	+	11.1412	1090.08	787.705	811.93	669.436	889.596	445.321	521.205	680.624	637.606	7208.31	5023.3	5320.64	15990	20702.5	18692	7779.97	9212.69	8763.48	801.334	800.907	1316.79	44.167	32.0099	33.3226	35.4611	45.2289	21.4331	24.4017	29.0819
pgaptmp_000080	pgaptmp_000080	pgaptmp_000080	protein_coding	protein_coding	pgaptmp_000080	0.4891	597	GO:0006400	GO:0016432		TRUE	1.98835	1.79208e-07	6.026e-06	Chromosome_I	88412	89008	597	-	7.70744	153.414	137.298	142.945	105.7	92.1685	93.1876	66.0787	108.213	111.898	393.511	241.278	339.024	462.495	633.774	590.219	515.743	529.939	604.606	129.644	124.883	142.894	10.5888	9.50456	9.99394	9.5382	7.98274	7.6404	5.27011	7.87668
pgaptmp_000775	pgaptmp_000775	pgaptmp_000775	protein_coding	protein_coding	pgaptmp_000775	0.4701	1338				TRUE	3.62803	1.79555e-07	6.026e-06	Chromosome_I	820808	822145	1338	+	10.0086	400.88	409.254	469.678	388.849	290.843	476.658	399.442	382.104	339.212	1985.72	4323.05	3171.64	5228.84	2234.3	3511.01	3633.8	6850.6	4707.2	430.843	425.621	349.759	12.3457	12.6409	14.6516	15.6563	11.2395	17.4375	14.2145	12.4098
pgaptmp_005256	pgaptmp_005256	speF	protein_coding	protein_coding	pgaptmp_005256	0.4649	2181	GO:0006520	GO:0004586		TRUE	-2.32768	1.79898e-07	6.026e-06	Chromosome_II	2234718	2236898	2181	-	7.53466	288.325	271.956	218.911	226.135	206.867	204.518	357.864	287.325	292.764	108.972	78.0072	74.1036	82.4832	65.4862	98.809	124.722	101.194	95.2552	496.782	576.627	648.84	5.44735	5.15329	4.1894	5.58568	4.90433	4.58995	7.8126	5.72473
pgaptmp_004007	pgaptmp_004007	pgaptmp_004007	protein_coding	protein_coding	pgaptmp_004007	0.4458	480				TRUE	-2.28163	1.8302e-07	6.0918e-06	Chromosome_II	775197	775676	480	+	11.5884	3592.5	4609.17	4080.07	6416.98	6611.55	6066.26	6521.74	5790.52	5615.3	1735.48	1701.65	1476.52	1028.09	1358.56	1445.25	1422.51	1275.58	1205.24	7360.65	6123.08	5606.11	308.4	396.847	354.787	720.2	712.207	618.604	646.927	524.221
pgaptmp_004497	pgaptmp_004497	pgaptmp_004497	protein_coding	protein_coding	pgaptmp_004497	0.448	471				TRUE	-2.67101	1.84736e-07	6.11022e-06	Chromosome_II	1372359	1372829	471	-	9.73533	934.358	1349.22	1269.36	1627.15	1584.61	1683.97	1752.94	1608.27	1596.13	623.563	464.415	539.104	419.78	603.805	574.41	217.421	222.361	269.89	1799.37	1620.93	1250.33	81.743	118.387	112.487	186.11	173.959	175.004	177.206	148.38
pgaptmp_004237	pgaptmp_004237	cyoD	protein_coding	protein_coding	pgaptmp_004237	0.4519	312	GO:0015990	GO:0009486	GO:0016020	TRUE	2.30586	1.87114e-07	6.12514e-06	Chromosome_II	1088911	1089222	312	+	12.9099	3479.95	3621.68	4431.31	3825.07	4183.08	5996.99	8273.2	8991.4	7849.03	16073.4	17609.7	16919.7	12359.2	9158.08	9388.18	19655.5	15430.8	18267.8	3537.27	3839.51	3403.71	459.596	479.73	592.814	660.464	693.243	940.831	1262.56	1252.3
pgaptmp_000260	pgaptmp_000260	hmpA	protein_coding	protein_coding	pgaptmp_000260	0.4624	1185	GO:0051409	GO:0008941,GO:0019825,GO:0020037,GO:0071949		TRUE	-3.0044	1.87516e-07	6.12514e-06	Chromosome_I	271432	272616	1185	-	10.618	2157.04	3024.96	4544.85	4491.31	4427.5	2502.04	4106.53	5656.94	5763.79	419.745	431.761	463.148	440.401	537.209	496.68	505.631	495.32	457.754	2759.4	4596.45	4579.27	75.0064	105.498	160.082	204.183	193.19	103.35	165.002	207.444
pgaptmp_002095	pgaptmp_002095	pgaptmp_002095	protein_coding	protein_coding	pgaptmp_002095	0.4792	720		GO:0003677,GO:0003700		TRUE	-2.08282	1.94264e-07	6.25059e-06	Chromosome_I	2271676	2272395	720	+	11.4481	6925.2	7646.46	6399.05	4571.38	4122.32	3053.75	5766.67	5830.83	6068.52	1331.88	1268.07	1456.14	1558.34	1454.02	1445.25	886.539	985.314	1099.4	3912.23	4595.18	4205.42	396.331	438.904	370.957	342.042	296.042	207.603	381.351	351.913
pgaptmp_001935	pgaptmp_001935	pgaptmp_001935	protein_coding	protein_coding	pgaptmp_001935	0.418	921				TRUE	-1.94338	1.95754e-07	6.25059e-06	Chromosome_I	2086187	2087107	921	+	12.4637	9195.57	11873.7	12188.7	8283.07	8750.54	9725.32	11918.7	10708.6	10329.1	2800.99	2993.3	2927.09	2942.88	2921.35	2526.88	2314.1	2406.03	2287.45	9707.65	8808.7	8560.37	411.412	532.803	552.383	484.502	491.269	516.865	616.17	505.256
pgaptmp_004390	pgaptmp_004390	pgaptmp_004390	protein_coding	protein_coding	pgaptmp_004390	0.449	294	GO:0006355	GO:0003700		TRUE	2.17204	1.96677e-07	6.25059e-06	Chromosome_II	1254678	1254971	294	-	4.98064	6.16738	8.80117	16.3366	23.7025	19.1164	9.07135	31.9257	24.6278	40.1143	62.5581	85.2637	59.2829	54.4978	49.9471	46.1109	101.126	99.8629	87.3173	13.9703	13.3803	15.7848	0.864394	1.23718	2.31929	4.34322	3.36204	1.51028	5.17041	3.64012
pgaptmp_001085	pgaptmp_001085	pgaptmp_001085	protein_coding	protein_coding	pgaptmp_001085	0.4284	768		GO:0004536		TRUE	1.86699	1.97067e-07	6.25059e-06	Chromosome_I	1153877	1154644	768	+	11.2795	1756.16	1835.04	1728.41	1209.47	1242.57	1147.11	1559.16	1297.81	1476.49	2762.65	1892.13	2284.24	10155.7	11536.7	10767.6	5327.66	5342	5297.25	1483.08	1296.62	1592.61	94.224	98.7477	93.935	84.8394	83.6571	73.1102	96.6635	73.4324
pgaptmp_001827	pgaptmp_001827	pgaptmp_001827	protein_coding	protein_coding	pgaptmp_001827	0.4182	636				TRUE	-2.49663	1.973e-07	6.25059e-06	Chromosome_I	1958494	1959129	636	-	9.96305	1620.48	2279.5	2302.65	2053.15	1605.78	2204.34	2478.32	2155.31	2052.16	496.429	386.408	522.431	593.584	653.753	570.458	215.736	290.268	281.797	1725.61	1516.43	1344.2	104.989	148.124	151.116	173.911	130.549	169.65	185.538	147.262
pgaptmp_003578	pgaptmp_003578	pgaptmp_003578	protein_coding	protein_coding	pgaptmp_003578	0.4957	1386	GO:0006508	GO:0008270		TRUE	2.57281	2.02573e-07	6.37924e-06	Chromosome_II	330947	332332	1386	+	9.15942	218.942	132.898	141.312	258.165	264.899	225.135	265.8	398.523	378.623	1166.41	881.663	1054.12	3349.41	3848.15	3648.03	1382.06	1512.59	1758.25	209.554	239.571	315.697	6.50915	3.96274	4.25555	10.0346	9.88237	7.95081	9.13112	12.4948
pgaptmp_003732	pgaptmp_003732	pgaptmp_003732	protein_coding	protein_coding	pgaptmp_003732	0.4703	1971	GO:0034755	GO:0005381	GO:0033573	TRUE	-2.40307	2.05445e-07	6.43115e-06	Chromosome_II	489586	491556	1971	+	8.37113	410.902	400.453	468.861	876.993	792.649	579.742	784.035	927.648	851.549	129.152	230.393	137.092	106.05	113.214	100.126	148.318	105.189	136.268	633.132	733.368	814.166	8.59033	8.39666	9.92884	23.9703	20.794	14.3973	18.9401	20.4519
pgaptmp_001650	pgaptmp_001650	pgaptmp_001650	protein_coding	protein_coding	pgaptmp_001650	0.4397	1542	GO:0009966	GO:0009975		TRUE	-2.13355	2.08491e-07	6.47969e-06	Chromosome_I	1725280	1726821	1542	+	8.59367	968.279	1233.92	1082.3	793.073	599.436	741.377	1178.28	637.338	958.52	139.242	108.847	144.502	113.414	120.983	144.92	153.375	181.085	133.622	687.895	725.085	738.565	25.8746	33.0709	29.2957	27.7072	20.1003	23.5336	36.3829	17.9607
pgaptmp_000501	pgaptmp_000501	pgaptmp_000501	protein_coding	protein_coding	pgaptmp_000501	0.504	375				TRUE	3.06783	2.09459e-07	6.47969e-06	Chromosome_I	516746	517120	375	+	7.86406	486.452	296.599	477.846	42.2802	40.9638	37.9348	41.5776	45.5242	54.8932	1200.71	1442.23	1313.49	1218.1	773.626	907.726	529.227	611.161	629.743	68.7337	42.0524	78.0935	53.4524	32.6874	53.186	6.07393	5.64823	4.95152	5.27911	5.27531
pgaptmp_004660	pgaptmp_004660	pgaptmp_004660	protein_coding	protein_coding	pgaptmp_004660	0.4356	264				TRUE	-2.71114	2.14053e-07	6.58307e-06	Chromosome_II	1575391	1575654	264	-	8.06012	972.905	1136.23	972.846	707.872	608.312	696.845	2300.13	1509.76	1626.39	62.5581	54.4236	68.5459	32.4041	46.6173	47.4283	69.1029	45.2712	76.7334	468.283	479.779	453.607	151.853	177.871	153.809	144.449	119.142	129.201	414.841	248.509
pgaptmp_000495	pgaptmp_000495	pgaptmp_000495	protein_coding	protein_coding	pgaptmp_000495	0.5065	768				TRUE	2.36898	2.17998e-07	6.66542e-06	Chromosome_I	514210	514977	768	+	7.16385	380.065	273.716	313.663	41.6396	36.1847	49.4801	57.9117	77.615	49.9669	292.611	377.337	351.992	413.889	217.548	270.078	237.646	320.893	321.486	51.9693	45.8753	51.5085	20.3918	14.7293	17.0468	2.92085	2.43617	3.15357	3.59036	4.39159
pgaptmp_000340	pgaptmp_000340	pgaptmp_000340	protein_coding	protein_coding	pgaptmp_000340	0.4632	231				TRUE	2.27658	2.21311e-07	6.7276e-06	Chromosome_I	357743	357973	231	+	6.8463	56.2774	55.4474	57.1782	70.4669	68.2729	60.2008	50.4871	32.8371	46.4481	165.476	168.713	201.932	297.529	369.609	320.141	407.875	364.833	365.145	81.0275	72.6359	58.9855	10.0388	9.91997	10.3314	16.4338	15.282	12.7563	10.4064	6.17718
pgaptmp_001456	pgaptmp_001456	pgaptmp_001456	protein_coding	protein_coding	pgaptmp_001456	0.4432	774				TRUE	-2.32421	2.25344e-07	6.80538e-06	Chromosome_I	1507148	1507921	774	-	9.88255	1881.05	2071.8	2184.21	2198.57	1831.08	2375.05	2657.25	1931.42	2047.24	276.466	283.003	192.669	325.514	447.304	366.252	416.303	362.17	377.052	2378.3	1709.49	1811.1	100.142	110.624	117.786	153.025	122.324	150.198	163.465	108.436
pgaptmp_000896	pgaptmp_000896	fliI	protein_coding	protein_coding	pgaptmp_000896	0.5015	1320	GO:0044780,GO:0071973	GO:0016887		TRUE	1.95792	2.27528e-07	6.80538e-06	Chromosome_I	943967	945286	1320	+	10.7326	1570.37	1401.15	1395.15	770.652	1040.48	999.498	896.888	1053.03	1007.78	2308.6	3181.97	2991.93	4570.45	2870.3	3082.84	3239.41	3417.98	3998.07	860.009	889.472	983.645	49.0215	43.8683	44.1151	31.452	40.7571	37.063	32.3517	34.6659
pgaptmp_001844	pgaptmp_001844	pgaptmp_001844	protein_coding	protein_coding	pgaptmp_001844	0.4608	1428		GO:0022857	GO:0016020	TRUE	-1.94	2.27752e-07	6.80538e-06	Chromosome_I	1974186	1975613	1428	+	11.6405	6813.42	8460.56	9550.39	5317.05	5169.63	4694.01	5215.76	4956.91	4756.01	2011.95	2367.43	2108.25	1064.92	1098.84	1438.66	1267.45	1319.52	1275.36	5000.23	5440.05	4474.59	196.605	244.857	279.147	200.589	187.187	160.897	173.909	150.841
pgaptmp_000573	pgaptmp_000573	mutS	protein_coding	protein_coding	pgaptmp_000573	0.4817	2562	GO:0006298	GO:0005524,GO:0030983		TRUE	3.0661	2.31343e-07	6.83261e-06	Chromosome_I	582260	584821	2562	-	12.3214	2372.9	2044.51	1898.31	1392.68	1803.09	1085.26	1305.24	1907.54	1760.1	21986.1	18103.1	20971.3	37422.3	41703.6	40513	12780.7	14793	15280.5	1360.7	1483.94	2282.99	38.1644	32.9801	30.9264	29.2845	36.39	20.7343	24.2574	32.3543
pgaptmp_004737	pgaptmp_004737	pgaptmp_004737	protein_coding	protein_coding	pgaptmp_004737	0.3539	438				TRUE	-3.57906	2.33581e-07	6.83261e-06	Chromosome_II	1654088	1654525	438	-	9.0084	94.0526	113.535	85.7672	1151.17	1267.15	1971.78	1352.01	1340.35	1221.73	389.475	489.813	644.702	365.283	256.395	430.807	146.633	151.792	178.604	2785.11	1715.86	1502.05	8.8482	10.7127	8.17313	141.589	149.588	220.352	146.974	132.979
pgaptmp_004895	pgaptmp_004895	pgaptmp_004895	protein_coding	protein_coding	pgaptmp_004895	0.4493	612		GO:0031992	GO:0016020	TRUE	-2.43043	2.33712e-07	6.83261e-06	Chromosome_II	1830672	1831283	612	+	7.00816	194.273	147.86	182.97	318.382	262.168	103.908	100.974	148.513	144.271	98.8822	130.617	87.0718	27.9854	76.5856	55.3331	60.6757	70.5698	55.5655	340.874	334.508	456.93	13.0803	9.98481	12.4787	28.0261	22.1499	8.31058	7.85582	10.5451
pgaptmp_004994	pgaptmp_004994	pgaptmp_004994	protein_coding	protein_coding	pgaptmp_004994	0.453	1395				TRUE	-1.90545	2.34763e-07	6.83261e-06	Chromosome_II	1946654	1948048	1395	+	9.50366	938.213	1160.87	1110.89	1241.5	1281.48	1126.5	1245.84	1335.87	1358.26	452.033	520.653	463.148	349.081	401.797	342.538	320.233	278.285	317.517	1055.59	1248.19	1209.62	27.7131	34.3916	33.2382	47.9443	47.4988	39.5265	42.5228	41.6129
pgaptmp_001726	pgaptmp_001726	pgaptmp_001726	protein_coding	protein_coding	pgaptmp_001726	0.4547	453				TRUE	-2.05884	2.35159e-07	6.83261e-06	Chromosome_I	1822590	1823042	453	-	8.38001	564.315	600.24	686.955	550.923	614.456	677.053	622.922	561.962	544.006	320.863	460.787	402.012	119.306	96.5645	117.253	112.924	107.852	89.9633	466.606	417.338	498.469	51.3313	54.7606	63.2952	65.5175	70.1353	73.1572	65.4739	53.9072
pgaptmp_000915	pgaptmp_000915	pgaptmp_000915	protein_coding	protein_coding	pgaptmp_000915	0.4875	1116	GO:0006482,GO:0006935,GO:0018277	GO:0000156,GO:0008984,GO:0050568	GO:0005737	TRUE	2.44594	2.39554e-07	6.92207e-06	Chromosome_I	963109	964224	1116	+	12.378	5353.29	4598.61	4458.26	1992.29	3154.89	2378.34	2982.45	4578.54	3565.25	7728.95	10685.2	10559.8	11580	8219.08	9443.51	12406.5	12062.1	14412.6	2091.63	2156.14	2901.92	197.658	170.296	166.741	96.173	146.172	104.314	127.245	178.279
pgaptmp_000794	pgaptmp_000794	pgaptmp_000794	protein_coding	protein_coding	pgaptmp_000794	0.4521	480	GO:0032784	GO:0003677		TRUE	-1.76391	2.41841e-07	6.94996e-06	Chromosome_I	840044	840523	480	+	8.80153	555.835	871.316	739.232	713.638	612.408	664.683	798.142	753.015	756.541	262.34	223.137	259.363	272.489	248.626	218.697	203.938	210.378	220.939	759.982	731.457	736.903	47.7159	75.0198	64.2807	80.0942	65.9696	67.7807	79.172	68.171
pgaptmp_001639	pgaptmp_001639	pgaptmp_001639	protein_coding	protein_coding	pgaptmp_001639	0.4118	561				TRUE	-3.13557	2.43606e-07	6.96264e-06	Chromosome_I	1714842	1715402	561	+	11.016	6596.79	9666.32	10281.4	4846.84	4750.43	8892.4	10744.1	7907.03	7038.3	758.769	674.853	585.419	371.174	258.615	287.205	547.767	500.646	342.654	5023.7	3979.05	3413.68	484.538	712.099	764.949	465.437	437.839	775.87	911.885	612.474
pgaptmp_002814	pgaptmp_002814	pgaptmp_002814	protein_coding	protein_coding	pgaptmp_002814	0.4947	1413		GO:0016491		TRUE	1.99335	2.45286e-07	6.97274e-06	Chromosome_I	3056582	3057994	1413	+	9.10886	548.126	462.941	562.796	258.165	270.361	303.478	284.361	359.716	342.027	782.985	682.11	687.311	1754.24	1567.23	1563.82	947.215	1185.04	1078.24	257.053	278.438	252.558	15.9844	13.5402	16.6246	9.84283	9.8934	10.5128	9.5821	11.0625
pgaptmp_000506	pgaptmp_000506	pgaptmp_000506	protein_coding	protein_coding	pgaptmp_000506	0.4677	201				TRUE	2.58975	2.59803e-07	7.34572e-06	Chromosome_I	519418	519618	201	+	7.80928	551.21	402.213	537.475	61.4984	67.5902	45.3568	75.7306	54.4797	57.0045	665.941	1063.08	948.527	798.319	489.482	642.917	358.998	499.315	455.108	77.6746	59.8928	58.1547	113	82.6994	111.61	16.4828	17.3873	11.0453	17.9394	11.7781
pgaptmp_002473	pgaptmp_002473	zipA	protein_coding	protein_coding	pgaptmp_002473	0.4324	969	GO:0000917	GO:0005515	GO:0016020	TRUE	2.09341	2.62209e-07	7.37409e-06	Chromosome_I	2690376	2691344	969	-	13.6872	5280.05	6666.89	6724.97	5481.69	4794.81	7014.63	7890.09	6669.66	6560.45	39074.6	39449.9	42637.4	46816.6	42482.8	40712	26449.5	27616.8	24620.8	6572.17	5864.4	6017.35	224.529	284.342	289.673	304.758	255.854	354.335	387.696	299.101
pgaptmp_001473	pgaptmp_001473	btuC	protein_coding	protein_coding	pgaptmp_001473	0.491	996		GO:0005524,GO:0022857		TRUE	1.88155	2.66569e-07	7.45684e-06	Chromosome_I	1524877	1525872	996	+	9.94479	737.773	919.722	900.148	616.906	762.609	762.818	619.209	665.698	619.308	1019.09	1121.13	1120.82	2305.11	1656.03	1861.56	1951.73	1941.34	2249.08	506.282	594.468	550.808	30.5226	38.1627	37.7221	33.3675	39.5901	37.4882	29.6013	29.0439
pgaptmp_000878	pgaptmp_000878	pgaptmp_000878	protein_coding	protein_coding	pgaptmp_000878	0.4607	903		GO:0004601,GO:0020037		TRUE	-2.02528	2.84635e-07	7.85968e-06	Chromosome_I	922558	923460	903	+	12.7233	13680	16813.8	18728.3	12414.4	10333.1	10384.2	14157.2	13351.3	12902	2637.53	2726.62	2502.85	2502.48	2767.07	2841.75	3109.63	3126.38	2915.87	13308.6	12901.2	11164.9	624.248	769.518	865.668	740.629	591.68	562.884	746.486	642.499
pgaptmp_001985	pgaptmp_001985	hcp	protein_coding	protein_coding	pgaptmp_001985	0.4717	1662		GO:0016661,GO:0051536		TRUE	-3.57877	2.85721e-07	7.85968e-06	Chromosome_I	2146717	2148378	1662	+	8.96045	2563.32	2441.44	1910.57	2394.59	2641.48	934.35	1300.04	2500.84	2331.56	86.7742	114.29	90.777	73.6457	82.1353	86.952	75.8446	119.836	93.9322	883.479	1234.81	1677.35	63.5521	60.7096	47.9813	77.6185	82.1789	27.5176	37.2443	65.3872
pgaptmp_002722	pgaptmp_002722	pgaptmp_002722	protein_coding	protein_coding	pgaptmp_002722	0.4752	966		GO:0042301		TRUE	1.90114	2.87584e-07	7.85968e-06	Chromosome_I	2948539	2949504	966	-	9.3262	511.893	493.746	563.613	367.709	454.015	456.042	465.521	490.318	453.221	754.733	865.336	917.033	1098.79	835.782	856.345	1462.96	1407.4	1468.52	330.257	425.621	388.806	21.8353	21.1236	24.3526	20.5065	24.3017	23.1079	22.9453	22.0566
pgaptmp_000968	pgaptmp_000968	aqpZ	protein_coding	protein_coding	pgaptmp_000968	0.4635	699	GO:0006833	GO:0015250		TRUE	-2.27935	2.88283e-07	7.85968e-06	Chromosome_I	1025925	1026623	699	-	8.39141	298.347	330.924	317.747	483.659	396.666	630.871	495.961	377.627	374.4	326.917	306.587	311.235	263.652	218.657	208.158	161.802	145.134	119.069	773.393	765.226	629.732	17.5874	19.5656	18.9734	37.2758	29.3421	44.177	33.7834	23.4759
pgaptmp_001450	pgaptmp_001450	pgaptmp_001450	protein_coding	protein_coding	pgaptmp_001450	0.4583	384				TRUE	-2.64426	2.88443e-07	7.85968e-06	Chromosome_I	1503641	1504024	384	-	7.00439	222.026	234.111	203.391	265.853	319.517	235.855	274.709	330.61	314.58	50.4501	59.866	48.1674	82.4832	67.7061	59.2854	21.9107	37.2822	38.3667	243.641	250.403	267.512	23.8249	25.196	22.1076	37.297	43.0236	30.064	34.0624	37.413
pgaptmp_004505	pgaptmp_004505	pgaptmp_004505	protein_coding	protein_coding	pgaptmp_004505	0.4688	192				TRUE	-2.66125	2.94183e-07	7.97477e-06	Chromosome_II	1382109	1382300	192	-	8.94937	988.323	1368.58	1329.8	1586.79	1589.39	1800.25	1752.94	1512.75	1270.29	171.53	268.49	250.1	104.577	103.224	118.571	129.779	141.14	89.9633	901.92	814.924	707.826	212.107	294.585	289.085	445.227	428.03	458.949	434.709	342.375
pgaptmp_001214	pgaptmp_001214	pgaptmp_001214	protein_coding	protein_coding	pgaptmp_001214	0.4407	624				TRUE	-3.25765	2.98155e-07	8.04101e-06	Chromosome_I	1296897	1297520	624	+	8.41939	1090.86	1027.98	1088.02	796.917	727.79	522.015	1034.24	960.485	1230.88	127.134	88.892	87.0718	61.8624	122.093	115.936	70.7883	82.5534	100.547	612.456	984.408	1085.83	72.0346	68.0832	72.7768	68.8007	60.3066	40.9479	78.917	66.8873
pgaptmp_003567	pgaptmp_003567	pgaptmp_003567	protein_coding	protein_coding	pgaptmp_003567	0.4312	552		GO:0008080,GO:0016746		TRUE	-1.93403	3.0196e-07	8.10207e-06	Chromosome_II	319290	319841	552	-	8.44762	471.805	526.31	535.024	741.184	667.709	602.008	952.573	862.72	928.963	131.17	107.033	116.713	150.237	189.799	209.475	168.544	130.488	158.759	592.898	612.945	621.425	35.2194	39.4043	40.4553	72.3355	62.545	53.3821	82.1659	67.9154
pgaptmp_004093	pgaptmp_004093	torS	protein_coding	protein_coding	pgaptmp_004093	0.469	2964	GO:0000160	GO:0000155,GO:0004673	GO:0016020	TRUE	-1.99558	3.05181e-07	8.13628e-06	Chromosome_II	900526	903489	2964	+	10.1487	1435.46	1410.83	1342.05	1919.9	1908.23	1398.64	2068.49	2201.58	2171.1	851.597	972.369	926.295	599.476	740.328	652.14	394.392	475.348	441.878	1662.46	1617.11	2058.68	19.9559	19.6715	18.8987	34.8952	33.2886	23.0972	33.2282	32.277
pgaptmp_004266	pgaptmp_004266	hxsC	protein_coding	protein_coding	pgaptmp_004266	0.4361	1158				TRUE	-1.73169	3.06329e-07	8.13628e-06	Chromosome_II	1114087	1115244	1158	+	9.3203	982.156	1030.62	994.083	1105.69	1183.85	824.669	1060.23	1221.69	1221.02	421.763	475.3	394.602	362.337	589.376	386.014	235.961	248.992	227.554	799.657	762.677	874.813	34.9486	36.7816	35.8307	51.4386	52.8607	34.8581	43.5937	45.8448
pgaptmp_001114	pgaptmp_001114	pgaptmp_001114	protein_coding	protein_coding	pgaptmp_001114	0.4349	453				TRUE	-3.46675	3.10736e-07	8.21187e-06	Chromosome_I	1185501	1185953	453	-	9.20181	1070.04	1694.22	1587.92	1909.01	1909.59	1946.22	1383.94	1116.46	1225.95	183.638	186.855	194.522	175.277	204.228	154.142	166.858	138.477	109.808	2133.54	1527.27	1179.71	97.3331	154.566	146.309	227.026	217.965	210.294	145.463	107.098
pgaptmp_004498	pgaptmp_004498	pgaptmp_004498	protein_coding	protein_coding	pgaptmp_004498	0.4614	453				TRUE	-2.06572	3.1478e-07	8.27714e-06	Chromosome_II	1372831	1373283	453	-	10.0451	1045.37	1451.31	1428.64	1677.75	1639.23	1926.43	2101.9	1867.24	1731.95	865.724	878.035	844.781	689.324	705.92	608.664	396.077	346.192	381.021	1792.66	1630.49	1365.8	95.0891	132.405	131.633	199.524	187.105	208.155	220.926	179.118
pgaptmp_004274	pgaptmp_004274	pgaptmp_004274	protein_coding	protein_coding	pgaptmp_004274	0.4711	1074	GO:0055085	GO:0022857,GO:0042802	GO:0016020	TRUE	2.5814	3.18527e-07	8.28242e-06	Chromosome_II	1123854	1124927	1074	+	7.94015	164.207	108.254	110.272	87.7634	96.9476	69.2722	58.6541	106.721	101.341	809.219	1095.73	942.969	521.411	617.125	603.394	867.999	916.076	682.662	107.85	119.148	165.326	6.30006	4.16565	4.28551	4.40224	4.66742	3.15709	2.60032	4.31799
pgaptmp_003246	pgaptmp_003246	pgaptmp_003246	protein_coding	protein_coding	pgaptmp_003246	0.5083	423	GO:0015986	GO:0046933		TRUE	2.78428	3.18897e-07	8.28242e-06	Chromosome_I	3515755	3516177	423	-	14.1769	16486.2	12970.3	10610.6	6296.54	8556.65	7436.04	8115.06	14842.4	11681	42587.9	53687.1	55010.8	41829.3	29487.7	33440.9	60294.8	46718.5	51375.6	6758.81	6658.93	9649.53	1605.97	1267.22	1046.99	801.911	1045.94	860.466	913.448	1524.76
pgaptmp_003223	pgaptmp_003223	pgaptmp_003223	protein_coding	protein_coding	pgaptmp_003223	0.4751	1446		GO:0015079		TRUE	1.66842	3.21368e-07	8.28242e-06	Chromosome_I	3490886	3492331	1446	+	10.9028	1310.57	1283.21	1410.67	1010.88	1186.58	1079.49	1146.35	1101.54	1194.28	2728.34	3296.26	2869.66	3869.34	3505.18	3819.3	3884.93	3978.54	4250.76	1204.79	1262.21	1337.56	37.3465	36.6751	40.719	37.6613	42.4301	36.5413	37.7471	33.103
pgaptmp_000051	pgaptmp_000051	pgaptmp_000051	protein_coding	protein_coding	pgaptmp_000051	0.4739	306				TRUE	1.68784	3.22318e-07	8.28242e-06	Chromosome_I	56702	57007	306	+	7.87601	199.669	150.5	185.421	117.872	152.931	145.142	113.596	111.198	128.084	353.151	342.869	418.686	452.185	402.907	436.077	529.227	544.586	511.997	157.584	159.926	157.018	26.8873	20.3262	25.2917	20.7517	25.8416	23.2169	17.6756	15.7912
pgaptmp_000498	pgaptmp_000498	pgaptmp_000498	protein_coding	protein_coding	pgaptmp_000498	0.5357	336				TRUE	3.33819	3.22855e-07	8.28242e-06	Chromosome_I	516096	516431	336	+	8.7734	1167.95	782.424	1110.07	81.3573	79.1966	103.084	112.111	95.5261	132.307	1743.56	2374.69	2065.64	1883.86	1175.42	1475.55	1014.63	1059.88	1128.51	138.585	70.0873	83.0781	143.233	96.2375	137.896	13.0443	12.1874	15.017	15.887	12.3544
pgaptmp_002307	pgaptmp_002307	pgaptmp_002307	protein_coding	protein_coding	pgaptmp_002307	0.4731	744				TRUE	-2.12591	3.26593e-07	8.33764e-06	Chromosome_I	2510658	2511401	744	-	8.63855	1120.92	1459.23	1480.1	809.089	749.637	878.272	1715.82	1494.09	1348.4	50.4501	83.4496	75.9562	153.183	106.554	93.5392	155.06	153.123	178.604	673.925	856.339	690.379	62.0813	81.0576	83.0345	58.5851	52.0981	57.7815	109.807	87.2651
pgaptmp_004685	pgaptmp_004685	pgaptmp_004685	protein_coding	protein_coding	pgaptmp_004685	0.4535	699				TRUE	-3.09176	3.29942e-07	8.38243e-06	Chromosome_II	1599082	1599780	699	-	8.21711	1092.4	906.52	913.217	872.509	948.311	479.957	833.037	1119.45	1019.75	86.7742	72.5649	96.3347	91.3206	122.093	94.8567	69.1029	49.2657	59.5345	398.432	628.237	695.364	64.3964	53.5972	54.5303	67.2445	70.1484	33.6092	56.744	69.5927
pgaptmp_001586	pgaptmp_001586	pgaptmp_001586	protein_coding	protein_coding	pgaptmp_001586	0.4353	1167				TRUE	-1.92556	3.37339e-07	8.52917e-06	Chromosome_I	1654167	1655333	1167	+	7.46382	184.251	220.029	267.921	276.743	234.176	258.946	305.15	279.115	284.319	90.8102	87.0778	74.1036	100.158	103.224	73.7774	112.924	89.2109	99.2242	400.667	423.71	395.452	6.50573	7.79204	9.58244	12.7753	10.3757	10.861	12.4502	10.3932
pgaptmp_002109	pgaptmp_002109	pgaptmp_002109	protein_coding	protein_coding	pgaptmp_002109	0.4592	453	GO:0006355	GO:0003700		TRUE	1.97388	3.40145e-07	8.55896e-06	Chromosome_I	2289267	2289719	453	-	8.41479	265.968	266.675	261.386	240.228	223.253	151.739	175.22	182.097	226.611	472.213	536.98	527.988	500.791	500.581	517.759	935.417	868.142	885.08	183.849	237.023	245.911	24.193	24.3291	24.0838	28.5687	25.4825	16.3958	18.417	17.4679
pgaptmp_001725	pgaptmp_001725	pgaptmp_001725	protein_coding	protein_coding	pgaptmp_001725	0.4295	624				TRUE	-2.50159	3.4321e-07	8.59496e-06	Chromosome_I	1821977	1822600	624	-	9.61172	1440.08	1880.81	2011.04	1401.01	1387.31	1748.3	2096.7	1709.02	1658.76	605.401	865.336	781.793	228.302	179.81	168.634	273.041	195.731	171.989	1358.47	1236.72	1149.8	95.0958	124.567	134.517	120.954	114.956	137.14	159.987	119.015
pgaptmp_002133	pgaptmp_002133	pgaptmp_002133	protein_coding	protein_coding	pgaptmp_002133	0.4771	807		GO:0008168,GO:1904047		TRUE	-3.40205	3.45979e-07	8.62325e-06	Chromosome_I	2317355	2318161	807	-	6.79919	212.775	231.471	424.752	288.914	327.027	184.726	376.426	585.844	534.857	20.18	25.3977	22.2311	26.5124	28.8583	26.3491	32.0233	17.3096	27.7828	250.906	405.869	414.56	10.8644	11.854	21.9686	19.2868	20.9534	11.2044	22.2095	31.5461
pgaptmp_004596	pgaptmp_004596	pgaptmp_004596	protein_coding	protein_coding	pgaptmp_004596	0.4539	1194				TRUE	-1.97458	3.56242e-07	8.83715e-06	Chromosome_II	1488178	1489371	1194	-	13.6025	15667.5	19843.1	20483.7	23650.6	19543.8	20886.4	33530.1	31726.6	30057.6	5676.64	5895.9	7369.61	6955.1	5697.3	6446.3	4678.77	4801.41	5052.5	18564.2	20542	18199.1	540.695	686.827	716.052	1067.09	846.348	856.232	1337.1	1154.67
pgaptmp_003628	pgaptmp_003628	pgaptmp_003628	protein_coding	protein_coding	pgaptmp_003628	0.4498	867	GO:0006355	GO:0003700,GO:0043565		TRUE	-1.93543	3.68812e-07	9.08661e-06	Chromosome_II	377613	378479	867	+	7.88363	270.594	308.921	335.717	506.721	382.328	329.867	523.432	464.944	492.632	115.026	112.476	135.239	132.562	144.292	121.206	99.4407	99.8629	103.193	414.078	451.107	369.698	12.8605	14.7255	16.162	31.4858	22.8014	18.6231	28.7458	23.3034
pgaptmp_000327	pgaptmp_000327	rpsR	protein_coding	protein_coding	pgaptmp_000327	0.4474	228	GO:0006412	GO:0003735	GO:0000314,GO:0022627	TRUE	-2.45662	3.69754e-07	9.08661e-06	Chromosome_I	346150	346377	228	+	16.5879	155897	164920	166142	121439	101204	84705	119593	143094	131278	145710	101946	129007	80989.6	107169	102427	22079.2	27182.7	26543.1	146121	134689	136602	28174.8	29893.7	30414.8	28693.7	22951.4	18184.7	24974.9	27272.4
pgaptmp_003726	pgaptmp_003726	pgaptmp_003726	protein_coding	protein_coding	pgaptmp_003726	0.4735	264				TRUE	2.42966	3.76455e-07	9.20827e-06	Chromosome_II	485729	485992	264	+	10.5533	267.51	362.608	360.222	871.868	740.761	1408.53	795.914	507.483	601.714	3622.32	4455.48	4322.09	3807.48	3498.52	3682.28	6913.66	4998.47	5022.07	1214.85	919.418	987.799	41.7537	56.7643	56.9518	177.914	145.084	261.154	143.547	83.5323
pgaptmp_000934	pgaptmp_000934	fadI	protein_coding	protein_coding	pgaptmp_000934	0.4962	1308	GO:0006631,GO:0016042	GO:0003988	GO:0005737	TRUE	2.13937	3.78586e-07	9.21751e-06	Chromosome_I	980574	981881	1308	+	7.80746	281.387	191.865	205.025	167.199	143.373	94.8369	85.3826	140.304	123.862	565.041	555.121	511.315	377.066	453.964	400.506	372.481	434.071	448.493	86.0568	75.1846	104.678	8.8645	6.06221	6.54243	6.88636	5.66766	3.54897	3.1081	4.66122
pgaptmp_001545	pgaptmp_001545	pgaptmp_001545	protein_coding	protein_coding	pgaptmp_001545	0.4626	1656				TRUE	-2.4519	3.80927e-07	9.23177e-06	Chromosome_I	1601549	1603204	1656	-	7.68379	620.593	760.421	740.049	470.847	477.228	386.77	423.201	430.614	463.074	68.6121	58.0519	46.3148	63.3353	91.0148	61.9203	69.1029	50.5972	80.7023	360.433	424.984	435.329	15.442	18.9773	18.6527	15.3174	14.9008	11.4321	12.168	11.2997
pgaptmp_003579	pgaptmp_003579	pgaptmp_003579	protein_coding	protein_coding	pgaptmp_003579	0.474	1344	GO:0006508	GO:0008270		TRUE	2.17323	3.84008e-07	9.26375e-06	Chromosome_II	332332	333675	1344	+	9.42811	305.285	267.556	255.668	354.897	382.328	285.335	317.029	511.214	437.738	1057.43	896.176	952.232	3636.62	3770.45	3800.85	1319.7	1533.89	1813.82	298.963	339.605	380.498	9.35977	8.22728	7.93996	14.2255	14.7089	10.3918	11.2314	16.5288
pgaptmp_000112	pgaptmp_000112	dinF	protein_coding	protein_coding	pgaptmp_000112	0.4911	1344	GO:0055085	GO:0015297,GO:0042910	GO:0016020	TRUE	1.66142	3.87331e-07	9.30124e-06	Chromosome_I	117136	118479	1344	+	9.81974	536.562	579.997	630.593	566.939	647.227	672.105	444.732	457.481	481.372	992.858	1302.54	1209.74	1695.32	1309.72	1392.55	2411.86	2264.89	2346.98	698.513	795.81	711.149	16.4505	17.8348	19.5835	22.7248	24.9001	24.4777	15.7555	14.7915
pgaptmp_001544	pgaptmp_001544	pgaptmp_001544	protein_coding	protein_coding	pgaptmp_001544	0.4185	681	GO:0000160			TRUE	-2.30648	3.90986e-07	9.34389e-06	Chromosome_I	1600882	1601562	681	-	7.17985	514.205	509.588	490.099	366.428	335.903	244.102	296.24	315.684	359.621	46.4141	30.8401	59.2829	39.7687	44.3975	38.2062	57.3048	46.6027	44.9816	229.112	309.658	304.066	31.1134	30.9253	30.0384	28.9872	25.5041	17.5451	20.7124	20.1439
pgaptmp_002939	pgaptmp_002939	thiP	protein_coding	protein_coding	pgaptmp_002939	0.4619	1587	GO:0015888	GO:0022857		TRUE	1.5463	3.9266e-07	9.34389e-06	Chromosome_I	3197421	3199007	1587	-	10.1355	901.209	771.862	920.568	629.718	827.468	672.93	666.727	674.653	637.606	1567.99	1941.11	1913.73	2131.31	1621.62	1773.29	2332.64	2161.03	2239.82	750.482	751.846	790.904	23.3995	20.1004	24.2114	21.3764	26.9599	20.7551	20.0034	18.4732
pgaptmp_003164	pgaptmp_003164	prlC	protein_coding	protein_coding	pgaptmp_003164	0.4993	2043	GO:0006508	GO:0004222		TRUE	2.69297	4.06079e-07	9.58549e-06	Chromosome_I	3429344	3431386	2043	-	12.1346	3380.5	2297.11	2146.63	1507.35	1828.35	1113.3	1394.33	2496.37	2304.11	9448.29	8481.02	9553.81	26836.5	27241.2	26833.9	10092.4	11309.8	13311.9	1480.29	1601.18	2297.94	68.1821	46.468	43.8561	39.7476	46.2738	26.6734	32.4961	53.0979
pgaptmp_002413	pgaptmp_002413	purU	protein_coding	protein_coding	pgaptmp_002413	0.4388	834	GO:0006189	GO:0008864		TRUE	-1.69554	4.07101e-07	9.58549e-06	Chromosome_I	2624245	2625078	834	+	10.2627	2162.44	2550.58	2679.21	2276.08	1861.8	1561.1	2492.43	2076.95	2403.34	702.265	513.396	550.22	533.195	926.797	835.266	559.565	549.912	468.338	1781.49	1679.55	1718.06	106.84	126.39	134.085	147.023	115.428	91.6214	142.295	108.217
pgaptmp_001591	pgaptmp_001591	pgaptmp_001591	protein_coding	protein_coding	pgaptmp_001591	0.428	243				TRUE	-2.18536	4.09357e-07	9.58549e-06	Chromosome_I	1659398	1659640	243	+	7.28392	276.761	308.921	361.039	269.056	243.734	272.141	343.015	232.845	284.319	68.6121	81.6355	57.4303	100.158	122.093	118.571	38.765	47.9342	55.5655	255.935	256.774	235.111	46.9307	52.5391	62.0139	59.6486	51.8626	54.8176	67.2109	41.6388
pgaptmp_004789	pgaptmp_004789	pgaptmp_004789	protein_coding	protein_coding	pgaptmp_004789	0.4553	615		GO:0015035		TRUE	-2.05458	4.10789e-07	9.58549e-06	Chromosome_II	1714425	1715039	615	+	10.2488	892.729	1043.82	1119.88	1986.53	2115.78	2293.4	1837.58	1536.63	1712.25	845.543	912.503	917.033	767.388	766.966	847.123	547.767	637.791	625.774	2665.52	2795.85	2159.2	59.814	70.1442	76.0038	174.014	177.885	182.532	142.267	108.575
pgaptmp_000999	pgaptmp_000999	pgaptmp_000999	protein_coding	protein_coding	pgaptmp_000999	0.4406	690				TRUE	-1.72529	4.11926e-07	9.58549e-06	Chromosome_I	1058182	1058871	690	-	9.56463	1115.53	1263.85	1529.92	1183.2	1027.51	1267.52	1530.2	1285.12	1341.37	351.133	379.151	377.929	424.199	418.446	459.791	385.965	348.855	336.039	1242.24	1243.73	1119.06	66.6175	75.6985	92.5469	92.3793	76.9981	89.916	105.593	80.9345
pgaptmp_004710	pgaptmp_004710	betA	protein_coding	protein_coding	pgaptmp_004710	0.4979	1701	GO:0019285	GO:0008812		TRUE	2.63823	4.14864e-07	9.61132e-06	Chromosome_II	1626417	1628117	1701	-	6.82135	53.1937	50.1667	40.8415	56.3736	70.3211	34.6361	48.2597	79.8539	54.1895	211.89	244.906	218.606	299.001	336.311	293.792	396.077	338.202	444.524	55.3222	41.4152	71.4472	1.28859	1.21886	1.00216	1.7854	2.1376	0.996683	1.35087	2.03999
pgaptmp_002608	pgaptmp_002608	nrdR	protein_coding	protein_coding	pgaptmp_002608	0.4333	450	GO:0006355	GO:0008270,GO:0140110		TRUE	1.64709	4.23011e-07	9.66186e-06	Chromosome_I	2816360	2816809	450	-	11.3903	2281.16	2481.05	2421.9	1188.33	1330.64	1721.08	2277.12	2401.59	2090.17	2944.27	2692.16	3486.58	5225.9	4710.57	5243.47	5663.06	4930.57	5102.77	1692.64	1663.62	1644.95	208.882	227.858	224.639	142.262	152.894	187.207	240.938	231.912
pgaptmp_003231	pgaptmp_003231	pgaptmp_003231	protein_coding	protein_coding	pgaptmp_003231	0.4428	603		GO:0015035		TRUE	-1.90114	4.25048e-07	9.66186e-06	Chromosome_I	3498216	3498818	603	+	11.3797	3808.36	3864.59	4767.02	3891.06	3241.6	3703.59	4295.86	3430.73	3637.03	2141.1	2131.59	1982.27	926.463	1490.64	1418.9	1250.59	1347.48	1360.03	5687.57	4570.97	4629.11	260.243	264.867	329.967	347.628	277.962	300.634	339.207	247.233
pgaptmp_005290	pgaptmp_005290	ompW	protein_coding	protein_coding	pgaptmp_005290	0.431	645			GO:0019867	TRUE	-2.05533	4.25768e-07	9.66186e-06	Chromosome_II	2277464	2278108	645	-	7.04872	171.916	227.95	260.569	495.19	402.128	482.431	422.458	361.954	332.174	42.3781	36.2824	35.1992	47.1332	32.1882	30.3014	55.6194	57.2548	46.3046	277.17	230.651	239.265	10.9828	14.6057	16.8618	41.3596	32.2365	36.6107	31.1858	24.3855
pgaptmp_004154	pgaptmp_004154	tssC	protein_coding	protein_coding	pgaptmp_004154	0.4573	1476	GO:0033103	GO:0003674	GO:0033104	TRUE	-3.1792	4.27087e-07	9.66186e-06	Chromosome_II	991158	992633	1476	+	7.48684	132.599	75.6901	73.5148	172.964	189.799	84.1162	260.603	367.179	350.472	159.422	99.7767	113.008	111.941	145.402	77.7298	129.779	111.846	78.0564	772.276	1005.43	1340.05	3.70178	2.11931	2.07888	6.31298	6.64892	2.7895	8.40669	10.8101
pgaptmp_001140	pgaptmp_001140	ati1	protein_coding	protein_coding	pgaptmp_001140	0.4133	450				TRUE	-1.76098	4.28068e-07	9.66186e-06	Chromosome_I	1210605	1211054	450	-	9.03876	934.358	917.082	973.662	590	577.589	492.327	601.39	749.283	794.544	407.637	555.121	437.211	125.198	162.051	159.412	365.74	350.186	349.269	1176.85	1101.01	1410.67	85.5577	84.2243	90.3102	70.6324	66.3667	53.5518	63.6322	72.3554
pgaptmp_000568	pgaptmp_000568	truD	protein_coding	protein_coding	pgaptmp_000568	0.4761	1044	GO:0001522	GO:0003723,GO:0009982		TRUE	2.37917	4.28069e-07	9.66186e-06	Chromosome_I	577722	578765	1044	+	11.326	2402.2	1776.08	1921.19	850.088	1166.1	782.611	1150.07	1600.06	1425.11	4498.13	4774.77	5331.76	7333.64	6908.24	7639.91	6011.95	6768.04	6888.8	1003.62	1192.76	1584.3	94.8126	70.3077	76.8086	43.8659	57.7537	36.6926	52.4512	66.6
pgaptmp_000362	pgaptmp_000362	pgaptmp_000362	protein_coding	protein_coding	pgaptmp_000362	0.4172	1419				TRUE	1.60715	4.31397e-07	9.69538e-06	Chromosome_I	390072	391490	1419	+	10.1915	1093.17	924.123	985.098	593.204	654.737	489.028	718.699	796.3	807.212	1701.18	1792.35	1945.22	1633.46	2105.55	2067.09	2447.25	2348.78	2491.19	728.13	798.358	854.874	31.7441	26.9147	28.976	22.5209	23.8577	16.8688	24.1156	24.3855
pgaptmp_002652	pgaptmp_002652	pgaptmp_002652	protein_coding	protein_coding	pgaptmp_002652	0.4875	2043				TRUE	-1.92135	4.40309e-07	9.84627e-06	Chromosome_I	2869815	2871857	2043	+	10.266	2762.99	2745.08	3063.93	1679.04	1716.38	1454.72	2347.65	2431.44	2457.53	556.969	569.634	518.725	539.086	548.309	525.664	532.598	585.863	635.035	1929.57	2448.6	2363.57	55.7274	55.5302	62.5967	44.2747	43.44	34.8532	54.7139	51.7169
pgaptmp_004896	pgaptmp_004896	pgaptmp_004896	protein_coding	protein_coding	pgaptmp_004896	0.432	1176				TRUE	-1.79366	4.41856e-07	9.84627e-06	Chromosome_II	1831287	1832462	1176	+	8.14478	296.805	328.284	295.693	581.032	464.939	322.445	290.301	292.549	288.541	244.178	214.066	201.932	117.833	133.192	148.872	210.679	178.422	168.02	673.925	628.874	697.026	10.3997	11.5368	10.4948	26.6169	20.4424	13.4209	11.7537	10.8101
pgaptmp_002221	pgaptmp_002221	cmoA	protein_coding	protein_coding	pgaptmp_002221	0.4472	738				TRUE	1.57867	4.57691e-07	1.01337e-05	Chromosome_I	2404221	2404958	738	+	9.98644	816.407	774.503	798.861	406.146	522.971	479.957	514.523	538.827	529.931	2342.9	2387.38	2445.42	1857.34	1975.69	2094.75	1995.56	1894.73	1775.45	607.985	601.477	674.595	45.5836	43.3719	45.181	29.6476	36.6408	31.8331	33.1956	31.7271
pgaptmp_003617	pgaptmp_003617	emrD	protein_coding	protein_coding	pgaptmp_003617	0.4925	1206	GO:0042908	GO:0042910	GO:0016020	TRUE	1.87612	4.5861e-07	1.01337e-05	Chromosome_II	366395	367600	1206	-	11.3569	883.477	1038.54	1103.54	1335.03	1637.87	2299.18	1441.11	1141.84	1126.02	5349.73	6284.12	6493.33	5364.35	4407.56	5292.21	7860.87	7280.67	5966.68	1913.37	1892.99	1933.23	30.1861	35.5891	38.1928	59.6358	70.2224	93.3163	56.8961	41.1428
pgaptmp_000760	pgaptmp_000760	recB	protein_coding	protein_coding	pgaptmp_000760	0.4897	3639	GO:0006281,GO:0006310	GO:0005524,GO:0008854	GO:0009338	TRUE	2.77475	4.64737e-07	1.01644e-05	Chromosome_I	803065	806703	3639	+	10.8792	1564.97	1079.9	1302.85	644.452	779.677	578.093	731.32	1006.76	1016.23	3022.97	3519.4	3340.22	6343.84	6307.77	6567.51	4982.15	5419.23	7580.73	775.07	762.04	1084.17	17.7208	12.2643	14.9435	9.54054	11.0784	7.77586	9.56882	12.0221
pgaptmp_000418	pgaptmp_000418	mlaF	protein_coding	protein_coding	pgaptmp_000418	0.4789	804		GO:0005524		TRUE	1.70078	4.6516e-07	1.01644e-05	Chromosome_I	455345	456148	804	+	11.547	2401.42	2429.12	2621.21	1611.13	1902.08	2168.88	1999.44	2021.72	2107.06	4298.35	4655.04	4575.9	5686.92	4455.28	4750.74	5405.19	5995.77	5815.86	1611.61	1827.37	1855.13	123.075	124.863	136.078	107.954	122.326	132.042	118.409	109.27
pgaptmp_002959	pgaptmp_002959	pgaptmp_002959	protein_coding	protein_coding	pgaptmp_002959	0.4574	1725	GO:0055085		GO:0016020	TRUE	2.45489	4.65794e-07	1.01644e-05	Chromosome_I	3218389	3220113	1725	-	8.36264	216.629	216.509	191.138	167.839	159.076	186.375	208.631	201.5	192.83	603.383	464.415	477.968	1075.23	683.721	815.504	738.221	1107.81	793.793	135.232	151.643	175.295	5.17471	5.18714	4.62487	5.24166	4.76825	5.28849	5.75866	5.07603
pgaptmp_003485	pgaptmp_003485	pgaptmp_003485	protein_coding	protein_coding	pgaptmp_003485	0.4333	390				TRUE	-2.42846	4.68881e-07	1.01895e-05	Chromosome_II	232248	232637	390	-	7.32708	272.907	286.038	285.891	408.708	341.365	347.185	488.537	418.673	448.999	58.5221	59.866	46.3148	42.7145	44.3975	52.6982	69.1029	70.5698	43.6586	387.814	365.728	349.759	28.8342	30.311	30.5968	56.4564	45.2583	43.5742	59.6438	46.6496
pgaptmp_000394	pgaptmp_000394	mreD	protein_coding	protein_coding	pgaptmp_000394	0.4642	489				TRUE	1.76094	4.76226e-07	1.03065e-05	Chromosome_I	427030	427518	489	+	11.0216	1399.22	1457.47	1526.66	1144.77	1227.55	1570.99	1294.1	1387.37	1225.25	2679.91	2686.71	3342.07	5239.15	3415.27	4051.17	4257.41	3994.52	4880.51	1245.59	1352.05	1266.94	117.906	123.178	130.309	126.117	129.8	157.253	126.006	123.288
pgaptmp_002978	pgaptmp_002978	rplO	protein_coding	protein_coding	pgaptmp_002978	0.4621	435	GO:0006412	GO:0003735	GO:0015934	TRUE	2.89155	4.81124e-07	1.03698e-05	Chromosome_I	3236286	3236720	435	-	17.3075	135609	104408	84340.2	47232.1	75867.6	52519.8	58114.4	107574	90078.4	437998	591719	601512	540131	370253	426192	439010	419350	437314	51605.6	50041.7	73813.3	12845.7	9919.44	8092.57	5849.41	9018.02	5909.72	6361.02	10746.2
pgaptmp_001139	pgaptmp_001139	ati2	protein_coding	protein_coding	pgaptmp_001139	0.412	1488				TRUE	-1.643	4.84295e-07	1.03781e-05	Chromosome_I	1209075	1210562	1488	-	11.3684	4661	4917.21	5230.98	2930.78	2844.25	2450.92	3285.37	3994.19	3835.49	2024.06	2869.94	2419.48	745.294	885.729	806.282	1781.51	1746.94	1624.63	5687.01	4978.11	5523.04	129.073	136.571	146.731	106.107	98.8346	80.6228	105.127	116.644
pgaptmp_002609	pgaptmp_002609	pgaptmp_002609	protein_coding	protein_coding	pgaptmp_002609	0.4556	1251	GO:0006561	GO:0004350,GO:0016620		TRUE	1.72455	4.85454e-07	1.03781e-05	Chromosome_I	2816937	2818187	1251	-	11.9169	2854.73	2767.97	2677.57	2160.13	2384.09	1965.19	2066.26	2589.65	2317.48	5149.95	5036	5422.53	11465.2	10605.4	10519.9	6972.65	7791.97	7416.68	2068.16	2216.03	2432.53	94.0298	91.4419	89.3356	93.0223	98.5393	76.8916	78.643	89.9543
pgaptmp_004796	pgaptmp_004796	pgaptmp_004796	protein_coding	protein_coding	pgaptmp_004796	0.4317	630				TRUE	-1.75768	4.87503e-07	1.03797e-05	Chromosome_II	1721557	1722186	630	-	9.12042	548.126	663.608	730.247	941.695	869.797	1014.34	1164.17	1014.97	959.928	312.791	339.241	320.498	312.258	315.222	345.173	281.468	271.627	248.722	952.771	981.859	842.412	35.8507	43.5324	48.3805	80.5256	71.3874	78.8092	87.9852	70.0081
pgaptmp_002503	pgaptmp_002503	pgaptmp_002503	protein_coding	protein_coding	pgaptmp_002503	0.4479	960				TRUE	-2.60316	4.92687e-07	1.04477e-05	Chromosome_I	2719935	2720894	960	-	12.9792	9558.67	9837.07	9890.19	13964	11343.5	11627.8	10577.8	10226.5	10129.9	5704.9	5279.09	5318.79	3900.28	5033.56	3914.16	3967.52	4187.59	2720.07	23971.8	19631.5	22737.7	410.284	423.483	430.006	783.614	610.972	592.871	524.634	462.907
pgaptmp_002695	pgaptmp_002695	iscR	protein_coding	protein_coding	pgaptmp_002695	0.4892	507				TRUE	2.3744	5.02821e-07	1.05468e-05	Chromosome_I	2918019	2918525	507	-	12.2799	3766.73	2663.23	2466.01	1565.65	2164.25	1322.77	1141.9	1895.6	1801.62	12654.9	13696.6	13157.1	21657.7	24046.8	24421.6	11636.2	13699.9	13785.5	2191.09	2210.3	3165.28	306.136	217.092	203.015	166.36	220.721	127.705	107.239	162.471
pgaptmp_003221	pgaptmp_003221	rsmB	protein_coding	protein_coding	pgaptmp_003221	0.4938	1284	GO:0001510,GO:0006355,GO:0006364	GO:0003723,GO:0008649		TRUE	1.64237	5.03498e-07	1.05468e-05	Chromosome_I	3488152	3489435	1284	+	11.7244	2546.36	2576.98	2509.3	1696.33	1782.61	1624.6	1787.84	1826.19	1799.51	5503.1	6298.63	5789.35	6523.53	7924.95	7949.52	6493.98	7068.96	6921.88	2205.06	2058.66	2300.43	81.717	82.9446	81.5698	71.1721	71.7851	61.9318	66.2973	61.8043
pgaptmp_003699	pgaptmp_003699	pgaptmp_003699	protein_coding	protein_coding	pgaptmp_003699	0.4473	237				TRUE	-2.15608	5.03853e-07	1.05468e-05	Chromosome_II	458124	458360	237	+	7.7001	165.748	217.389	190.322	513.768	313.373	600.359	701.622	475.392	506.707	131.17	70.7507	120.418	66.2811	62.1564	73.7774	102.812	90.5424	108.485	524.723	514.823	398.775	28.8177	37.908	33.5182	116.784	68.3686	123.992	140.957	87.1647
pgaptmp_004153	pgaptmp_004153	tssB	protein_coding	protein_coding	pgaptmp_004153	0.4556	507	GO:0033103	GO:0003674		TRUE	-3.08617	5.05379e-07	1.05468e-05	Chromosome_II	990643	991149	507	+	6.5587	65.5284	41.3655	38.391	101.857	98.313	61.0255	142.552	201.5	199.164	78.7021	61.6801	55.5777	61.8624	58.8266	25.0316	60.6757	62.5808	43.6586	379.432	544.77	702.01	5.32574	3.37188	3.16055	10.823	10.0264	5.89164	13.3874	17.2705
pgaptmp_003226	pgaptmp_003226	pgaptmp_003226	protein_coding	protein_coding	pgaptmp_003226	0.4944	807				TRUE	-1.93515	5.16907e-07	1.07447e-05	Chromosome_I	3493751	3494557	807	-	11.3974	5119.7	5975.99	5997.99	4235.06	4289.59	3915.53	7685.18	6848.78	6418.29	799.129	743.79	816.993	1512.68	1408.51	1495.31	1016.32	1259.6	1307.11	4175.99	4853.86	4801.09	261.414	306.04	310.222	282.716	274.844	237.492	453.433	368.788
pgaptmp_005072	pgaptmp_005072	pgaptmp_005072	protein_coding	protein_coding	pgaptmp_005072	0.4278	360				TRUE	1.66516	5.24151e-07	1.08524e-05	Chromosome_II	2034364	2034723	360	-	7.15448	84.0306	99.4532	89.0346	116.591	114.016	100.61	113.596	90.302	114.713	163.458	221.323	196.375	167.912	138.742	173.904	355.627	336.871	336.039	102.262	105.768	98.0322	9.61818	11.4172	10.3228	17.4472	16.3759	13.6795	15.0243	10.9002
pgaptmp_004008	pgaptmp_004008	secD	protein_coding	protein_coding	pgaptmp_004008	0.4693	1839				TRUE	-2.2323	5.33347e-07	1.09995e-05	Chromosome_II	775843	777681	1839	+	11.9366	9035.99	7259.2	5918.76	8078.07	10677.9	4354.25	5972.33	12275.9	10438.2	2201.64	2458.13	2547.31	1609.89	1617.18	1749.58	1105.65	1322.19	1352.09	4827.56	5965.07	7163	202.466	163.136	134.335	236.641	300.225	115.895	154.63	290.073
pgaptmp_002419	pgaptmp_002419	feoB	protein_coding	protein_coding	pgaptmp_002419	0.455	2277	GO:0006826	GO:0005525,GO:0015093	GO:0016020	TRUE	-1.80793	5.36579e-07	1.10229e-05	Chromosome_I	2629248	2631524	2277	-	13.393	15721.4	16081.5	17380.5	18466.8	17234.1	11954.4	14961.3	17138	15589.7	9524.98	11325.6	10378.2	4420.21	4951.43	4601.87	5054.62	5168.91	4543.14	16628	17049.1	18229.8	284.503	291.88	318.596	436.911	391.355	256.979	312.851	327.065
pgaptmp_004644	pgaptmp_004644	pgaptmp_004644	protein_coding	protein_coding	pgaptmp_004644	0.2838	444				TRUE	-2.42683	5.39317e-07	1.10361e-05	Chromosome_II	1554826	1555269	444	-	8.73379	1161.78	1408.19	1413.93	1747.58	1415.3	1406.06	1623.01	1440.35	1718.58	72.6481	52.6095	83.3666	73.6457	96.5645	36.8887	229.219	153.123	154.79	1132.15	969.116	895.582	107.82	131.075	132.919	212.04	164.82	155.008	174.049	140.969
pgaptmp_004812	pgaptmp_004812	pgaptmp_004812	protein_coding	protein_coding	pgaptmp_004812	0.4625	720				TRUE	-2.15102	5.45097e-07	1.11111e-05	Chromosome_II	1737662	1738381	720	-	9.97531	1117.84	1354.5	1481.73	1811	1823.57	1737.58	2499.85	2255.31	2157.73	518.627	682.11	576.156	596.53	538.319	583.632	308.435	420.756	342.654	1653.52	1787.86	1423.13	63.9742	77.7478	85.897	135.503	130.959	118.126	165.316	136.117
pgaptmp_000963	pgaptmp_000963	pgaptmp_000963	protein_coding	protein_coding	pgaptmp_000963	0.4485	330	GO:0008150	GO:0003677		TRUE	1.85032	5.75787e-07	1.16914e-05	Chromosome_I	1016740	1017069	330	+	12.8734	3999.55	4480.67	5184.43	3984.59	3536.54	5615.17	4399.06	3801.64	3515.28	12491.4	11659.4	13340.5	14005.9	13177.2	15594.7	20929.7	18156.4	17873.6	5411.52	5262.92	5124.26	499.408	561.14	655.734	650.479	554.126	832.878	634.715	500.604
pgaptmp_002016	pgaptmp_002016	torC	protein_coding	protein_coding	pgaptmp_002016	0.4473	1185		GO:0005506,GO:0009055,GO:0020037	GO:0009276,GO:0016020	TRUE	-2.21798	5.84606e-07	1.18248e-05	Chromosome_I	2184598	2185782	1185	-	8.97579	1594.27	1431.95	1324.08	623.312	642.448	343.062	980.044	1284.38	1235.8	280.502	286.631	277.889	184.114	190.909	193.666	205.623	198.394	170.666	746.012	892.657	1144.82	55.4372	49.9403	46.6378	28.3368	28.0326	14.1706	39.3786	47.099
pgaptmp_003065	pgaptmp_003065	pgaptmp_003065	protein_coding	protein_coding	pgaptmp_003065	0.463	1674			GO:0098561	TRUE	-1.97024	5.88585e-07	1.18596e-05	Chromosome_I	3315022	3316695	1674	-	10.9745	7787.86	7177.35	6778.88	3803.29	3798.71	2483.08	5417.71	6633.84	5897.5	593.293	740.162	759.562	721.728	710.359	766.758	659.005	644.449	748.812	2232.45	2786.93	3136.2	191.7	177.195	169.022	122.396	117.334	72.6052	154.097	172.206
pgaptmp_001262	pgaptmp_001262	pgaptmp_001262	protein_coding	protein_coding	pgaptmp_001262	0.4407	540				TRUE	-1.90969	5.95112e-07	1.19454e-05	Chromosome_I	1348447	1348986	540	+	7.61076	522.686	559.754	586.485	337.601	327.027	266.368	524.917	537.334	526.412	32.2881	87.0778	74.1036	86.9019	91.0148	98.809	79.2155	61.2493	74.0874	290.022	311.57	278.312	39.8846	42.8396	45.3319	33.6801	31.3137	24.1447	46.2839	43.2403
pgaptmp_003526	pgaptmp_003526	pgaptmp_003526	protein_coding	protein_coding	pgaptmp_003526	0.4283	600	GO:0006355	GO:0003677,GO:0003700		TRUE	-2.29778	5.9744e-07	1.19465e-05	Chromosome_II	279651	280250	600	-	10.0033	1010.68	1549.01	1493.17	2218.43	2063.89	2671.1	2607.51	1888.13	1903.67	435.889	400.921	437.211	340.243	456.184	389.966	519.114	440.728	465.692	2953.31	2202.02	1956.49	69.4098	106.695	103.872	199.186	177.86	217.907	206.922	136.747
pgaptmp_003727	pgaptmp_003727	pgaptmp_003727	protein_coding	protein_coding	pgaptmp_003727	0.4378	402		GO:0046872		TRUE	-2.00452	6.10181e-07	1.21551e-05	Chromosome_II	486161	486562	402	+	10.6403	1936.56	2977.44	2482.35	3207.53	2573.89	4985.95	4539.38	2941.16	3407.6	667.959	504.326	535.399	908.788	861.311	703.52	770.244	712.356	579.469	3085.19	2812.41	2456.62	198.501	306.096	257.738	429.842	331.061	607.092	537.655	317.929
pgaptmp_002654	pgaptmp_002654	pgaptmp_002654	protein_coding	protein_coding	pgaptmp_002654	0.4905	1368			GO:0016020	TRUE	1.59739	6.19164e-07	1.22875e-05	Chromosome_I	2872758	2874125	1368	+	10.5111	608.258	718.175	742.499	1016.01	1000.88	1204.02	803.339	749.283	674.905	2819.15	3084.01	3418.03	2135.72	1828.07	2313.45	3830.99	3425.96	3204.28	1178.53	1147.52	1117.4	18.3215	21.6963	22.6543	40.0105	37.8304	43.0803	27.9605	23.8011
pgaptmp_000689	pgaptmp_000689	pgaptmp_000689	protein_coding	protein_coding	pgaptmp_000689	0.502	504		GO:0008080,GO:0016746		TRUE	-2.37119	6.2929e-07	1.2427e-05	Chromosome_I	715096	715599	504	+	11.0434	5050.31	6017.36	5975.12	4912.83	4778.42	3693.69	4632.93	5403.2	4959.39	633.653	772.816	868.865	1048.71	808.034	873.472	559.565	641.786	752.781	2663.85	3926.8	3676.21	412.901	493.42	494.831	525.128	490.228	358.726	437.682	465.862
pgaptmp_003265	pgaptmp_003265	pgaptmp_003265	protein_coding	protein_coding	pgaptmp_003265	0.4458	738		GO:0005524,GO:0016887,GO:0042626,GO:0140359		TRUE	2.41725	6.30922e-07	1.2427e-05	Chromosome_I	3532223	3532960	738	-	10.8931	943.609	1044.7	1076.58	731.575	611.043	677.053	758.049	797.792	846.623	7198.22	5164.8	6409.96	5953.52	6068.02	6574.09	4661.91	6091.64	3749.35	960.036	906.675	829.951	52.6859	58.5028	60.8881	53.4031	42.8114	44.9054	48.9073	46.9755
pgaptmp_005271	pgaptmp_005271	pgaptmp_005271	protein_coding	protein_coding	pgaptmp_005271	0.4804	1251				TRUE	-2.5663	6.42586e-07	1.25583e-05	Chromosome_II	2255125	2256375	1251	+	8.1256	545.813	563.275	433.737	398.459	483.372	281.212	617.724	708.983	736.836	113.008	148.758	101.893	120.779	153.171	155.46	91.0135	81.2219	113.777	487.841	572.804	779.273	17.9782	18.6082	14.4714	17.1589	19.9788	11.003	23.511	24.6273
pgaptmp_000493	pgaptmp_000493	pgaptmp_000493	protein_coding	protein_coding	pgaptmp_000493	0.4746	531				TRUE	2.62377	6.44638e-07	1.25583e-05	Chromosome_I	513254	513784	531	+	6.38984	354.624	229.711	301.411	18.5776	19.1164	16.4934	29.6983	28.3593	29.5579	266.376	275.746	274.183	216.518	205.338	159.412	124.722	182.416	187.864	14.5291	21.6633	22.4311	27.519	17.8784	23.6922	1.88478	1.86147	1.52036	2.66299	2.32081
pgaptmp_002416	pgaptmp_002416	pgaptmp_002416	protein_coding	protein_coding	pgaptmp_002416	0.4545	429				TRUE	-1.75944	6.44752e-07	1.25583e-05	Chromosome_I	2627811	2628239	429	+	10.0305	1556.49	1586.85	1605.07	1609.21	1259.64	1064.65	1527.98	1173.93	1371.63	734.553	707.507	703.985	378.539	667.072	654.775	674.174	603.172	543.748	2269.89	1850.3	2119.32	149.502	152.869	156.163	202.078	151.821	121.473	169.587	118.911
pgaptmp_003486	pgaptmp_003486	pgaptmp_003486	protein_coding	protein_coding	pgaptmp_003486	0.4272	405	GO:0006355	GO:0003700,GO:0043565		TRUE	-2.477	6.48642e-07	1.25875e-05	Chromosome_II	232698	233102	405	-	7.43029	349.999	346.766	369.208	391.412	320.2	345.536	629.604	472.407	514.448	62.5581	36.2824	68.5459	50.0791	52.167	51.3807	84.2718	46.6027	55.5655	392.285	384.206	377.175	35.6098	35.3853	38.0502	52.0647	40.8799	41.761	74.0193	50.6872
pgaptmp_003252	pgaptmp_003252	atpE	protein_coding	protein_coding	pgaptmp_003252	0.4471	255	GO:0015986	GO:0015078		TRUE	2.78666	6.51794e-07	1.26022e-05	Chromosome_I	3521191	3521445	255	-	14.8382	28624.4	18882.9	17426.3	9826.94	12683.1	7524.28	9391.34	21275.5	16455.3	80883.6	81971.1	101631	66798.1	56707.8	62449.9	83783	80287.1	101105	11160	10810	16663	4625.45	3060.34	2852.37	2076.07	2571.75	1444.3	1753.56	3625.57
pgaptmp_004238	pgaptmp_004238	cyoE	protein_coding	protein_coding	pgaptmp_004238	0.4765	873	GO:0048034	GO:0008495	GO:0016020	TRUE	2.00283	6.65113e-07	1.28126e-05	Chromosome_II	1089231	1090103	873	+	11.9504	1928.85	1827.12	2437.42	2017.92	2627.83	2424.53	3453.17	3879.26	3451.94	9141.56	9099.63	8623.81	8005.29	5961.47	5682.18	6928.83	7384.53	9223.88	1774.22	1957.35	2145.08	91.0421	86.4958	116.535	124.524	155.642	135.939	188.337	193.095
pgaptmp_004338	pgaptmp_004338	tesA	protein_coding	protein_coding	pgaptmp_004338	0.4461	603	GO:0006629	GO:0016298		TRUE	-1.74909	6.68477e-07	1.28286e-05	Chromosome_II	1196980	1197582	603	-	9.33677	636.782	840.512	777.623	1165.27	1071.2	1201.54	1415.87	1288.11	1276.62	302.701	344.683	277.889	441.874	433.985	428.173	284.839	287.605	328.101	1136.62	999.063	962.045	43.5143	57.606	53.8261	104.105	91.854	97.5336	111.799	92.8267
pgaptmp_000109	pgaptmp_000109	plsB	protein_coding	protein_coding	pgaptmp_000109	0.4705	2427	GO:0008654	GO:0004366	GO:0005886	TRUE	1.57426	6.73123e-07	1.28286e-05	Chromosome_I	112636	115062	2427	-	11.7036	2281.93	2202.93	2080.47	1465.71	1504.74	1193.3	1277.77	1488.86	1403.3	9133.48	10062.9	10854.3	10789.1	11279.2	11489.5	5103.5	5648.25	5459.98	1813.34	1701.85	1929.07	38.7428	37.5122	35.7793	32.5344	32.0578	24.0664	25.0677	26.6577
pgaptmp_002396	pgaptmp_002396	folD	protein_coding	protein_coding	pgaptmp_002396	0.4866	861		GO:0004488		TRUE	1.48281	6.73262e-07	1.28286e-05	Chromosome_I	2606855	2607715	861	+	10.0663	837.993	932.924	802.128	554.126	701.163	666.332	512.296	628.383	629.865	1735.48	2017.3	1911.87	2234.41	1753.7	2140.86	1896.11	1971.96	1907.75	640.955	690.041	724.441	40.1047	44.7801	38.8849	34.6713	42.1075	37.8809	28.3302	31.7146
pgaptmp_000867	pgaptmp_000867	pgaptmp_000867	protein_coding	protein_coding	pgaptmp_000867	0.4273	543				TRUE	-2.07289	6.8641e-07	1.30319e-05	Chromosome_I	915128	915670	543	-	11.7538	5633.13	5715.48	7549.15	6240.81	4546.3	4332.81	6041.38	5041.99	5461.88	1846.47	1919.34	1608.05	1117.94	1884.67	1894.5	1666.9	1896.06	1537.31	8479.94	6697.16	6393.69	427.473	435.005	580.282	619.163	432.914	390.573	529.747	403.496
pgaptmp_004739	pgaptmp_004739	pgaptmp_004739	protein_coding	protein_coding	pgaptmp_004739	0.4007	891	GO:0006355	GO:0003677,GO:0003700		TRUE	-2.41894	7.19788e-07	1.36113e-05	Chromosome_II	1655362	1656252	891	+	9.31455	142.621	166.342	195.223	1302.36	1406.42	1928.08	1542.08	1299.3	1247.06	450.015	480.742	489.084	514.047	412.896	548.061	283.153	356.844	298.996	2141.92	1618.38	1384.91	6.59573	7.71554	9.1452	78.7438	81.6173	105.92	82.4068	63.3681
pgaptmp_005152	pgaptmp_005152	creD	protein_coding	protein_coding	pgaptmp_005152	0.4676	1341				TRUE	2.26524	7.22106e-07	1.36113e-05	Chromosome_II	2119044	2120384	1341	-	6.80689	37.0043	42.2456	45.7425	49.9675	64.1766	27.2141	42.3201	43.2853	39.4105	443.961	335.612	531.694	337.297	481.712	462.426	262.928	259.644	324.132	39.6755	57.3442	58.9855	1.13706	1.30195	1.42375	2.00735	2.47452	0.993339	1.50262	1.40265
pgaptmp_001656	pgaptmp_001656	yccX	protein_coding	protein_coding	pgaptmp_001656	0.4579	273		GO:0003998		TRUE	-1.73527	7.2634e-07	1.36142e-05	Chromosome_I	1742899	1743171	273	+	8.00204	435.571	484.944	520.321	436.895	443.774	456.866	472.945	414.942	389.883	113.008	121.546	187.112	135.508	130.972	125.158	101.126	107.852	124.361	400.667	384.843	392.129	65.7438	73.4127	79.5518	86.2142	84.0511	81.9142	82.4861	66.0483
pgaptmp_002952	pgaptmp_002952	pgaptmp_002952	protein_coding	protein_coding	pgaptmp_002952	0.5	300				TRUE	-1.68106	7.27434e-07	1.36142e-05	Chromosome_I	3212822	3213121	300	+	9.32151	945.922	1027.1	907.499	871.228	869.797	578.917	875.357	817.196	819.88	443.961	379.151	289.004	321.095	542.759	561.235	325.289	370.159	384.99	1264.03	1086.99	1185.53	129.925	141.492	126.26	156.45	149.913	94.4557	138.93	118.37
pgaptmp_003958	pgaptmp_003958	pgaptmp_003958	protein_coding	protein_coding	pgaptmp_003958	0.4524	378				TRUE	-1.95324	7.33141e-07	1.36506e-05	Chromosome_II	726645	727022	378	+	9.9128	1083.15	1341.3	1216.26	1882.11	1723.89	1967.66	2018.74	1819.47	1902.97	484.321	511.582	426.096	360.864	483.932	471.648	534.283	414.098	470.984	2157.57	1712.68	1704.76	118.074	146.648	134.3	268.236	235.81	254.795	254.286	209.166
pgaptmp_003888	pgaptmp_003888	pgaptmp_003888	protein_coding	protein_coding	pgaptmp_003888	0.4448	888		GO:0001216		TRUE	-1.84728	7.34575e-07	1.36506e-05	Chromosome_II	657191	658078	888	-	8.04988	333.039	349.406	372.475	499.034	458.794	391.718	589.511	608.979	573.564	167.494	172.342	163.028	73.6457	135.412	122.523	139.891	113.178	104.516	435.313	477.868	441.976	15.454	16.2615	17.5075	30.2748	26.7146	21.592	31.6091	29.8007
pgaptmp_003240	pgaptmp_003240	ilvA	protein_coding	protein_coding	pgaptmp_003240	0.491	1548	GO:0009097	GO:0004794		TRUE	1.79698	7.43344e-07	1.37421e-05	Chromosome_I	3508586	3510133	1548	+	10.173	881.165	815.868	833.167	543.877	596.023	493.152	598.421	694.057	695.314	1769.79	1498.46	1633.99	4118.27	4312.1	4368.68	1794.99	2240.92	2361.54	580.045	608.485	640.533	23.4555	21.7816	22.4648	18.9275	19.9084	15.5935	18.4064	19.4833
pgaptmp_005237	pgaptmp_005237	pgaptmp_005237	protein_coding	protein_coding	pgaptmp_005237	0.4976	828		GO:0016853		TRUE	2.0326	7.44724e-07	1.37421e-05	Chromosome_II	2215018	2215845	828	-	5.8861	16.9603	20.2427	19.6039	42.2802	48.4738	18.9674	25.986	31.3445	31.6692	108.972	125.174	127.829	113.414	120.983	113.301	160.116	225.024	207.709	40.7931	42.0524	42.3699	0.844037	1.01037	0.988221	2.75087	3.02706	1.12127	1.49431	1.64501
pgaptmp_002860	pgaptmp_002860	parC	protein_coding	protein_coding	pgaptmp_002860	0.4792	2289	GO:0006265	GO:0003918	GO:0009340	TRUE	2.96295	7.48728e-07	1.37677e-05	Chromosome_I	3107377	3109665	2289	-	12.5046	4875.32	3504.63	3091.7	1858.41	2549.99	1634.49	1985.33	3285.95	3080.36	9753.01	12029.4	12303.1	23930.4	19611.5	21363.8	16185.2	16056.6	25196.3	2120.13	2196.92	3071.4	87.7637	63.2758	56.3759	43.738	57.602	34.9518	41.2971	62.381
pgaptmp_004956	pgaptmp_004956	pgaptmp_004956	protein_coding	protein_coding	pgaptmp_004956	0.4071	678				TRUE	-1.70807	7.74141e-07	1.41854e-05	Chromosome_II	1888878	1889555	678	+	10.4669	1201.1	1448.67	1569.95	2049.31	1715.7	2183.72	2782.73	1906.79	2300.59	1170.44	1135.64	1030.04	699.634	746.987	804.964	834.291	822.871	767.334	3029.31	2539.71	2421.73	72.9973	88.3044	96.6489	162.833	130.844	157.652	195.422	122.211
pgaptmp_002776	pgaptmp_002776	mutH	protein_coding	protein_coding	pgaptmp_002776	0.4758	681	GO:0006304	GO:0004519		TRUE	-1.62232	7.79556e-07	1.42344e-05	Chromosome_I	3007060	3007740	681	+	9.39649	1187.99	1215.44	1235.87	1044.83	918.271	814.773	1043.89	1014.97	1102.09	425.799	333.798	403.865	528.776	493.922	536.204	261.243	312.904	296.35	910.861	932.161	902.229	71.8827	73.7613	75.7469	82.654	69.7217	58.5628	72.9865	64.7652
pgaptmp_002526	pgaptmp_002526	ispE	protein_coding	protein_coding	pgaptmp_002526	0.4559	873	GO:0016114	GO:0050515		TRUE	-2.04368	7.83558e-07	1.42344e-05	Chromosome_I	2746096	2746968	873	+	11.8254	4436.66	4369.78	3963.26	4939.09	5138.22	4011.19	3180.69	3458.34	3344.27	3664.69	3176.53	2925.24	2698.38	3853.7	3309.44	1589.37	1665.71	1853.51	8217.3	5745.88	7251.89	209.411	206.865	189.487	304.787	304.328	224.901	173.476	172.144
pgaptmp_000076	pgaptmp_000076	pgaptmp_000076	protein_coding	protein_coding	pgaptmp_000076	0.4686	732				TRUE	1.68374	7.85988e-07	1.42344e-05	Chromosome_I	83309	84040	732	+	10.9553	1891.84	1541.96	1455.59	1151.81	1258.95	985.479	1163.43	1594.09	1482.12	2102.76	2057.21	2178.65	4773.71	4074.58	4263.28	3804.03	3961.23	4476.99	1152.83	1236.72	1418.14	106.496	87.0573	82.9984	84.7687	88.9288	65.8975	75.6767	94.6324
pgaptmp_002825	pgaptmp_002825	carA	protein_coding	protein_coding	pgaptmp_002825	0.4658	1155	GO:0006207,GO:0006541	GO:0004088		TRUE	1.48128	7.87642e-07	1.42344e-05	Chromosome_I	3068662	3069816	1155	-	10.4343	1346.8	1135.35	1079.03	808.448	993.371	880.746	540.509	832.122	677.017	1864.64	2291.24	2030.44	3023.89	3186.63	3031.46	2526.47	2430	2422.39	911.978	800.907	919.675	48.0485	40.6247	38.9937	37.7081	44.4707	37.3251	22.282	31.3071
pgaptmp_003236	pgaptmp_003236	ilvG	protein_coding	protein_coding	pgaptmp_003236	0.5052	1647	GO:0009082	GO:0000287,GO:0003984,GO:0030976,GO:0050660		TRUE	2.41381	7.91674e-07	1.42583e-05	Chromosome_I	3503833	3505479	1647	+	10.3059	779.403	588.798	703.291	443.942	469.035	475.834	513.038	622.412	609.456	2796.95	2488.97	2667.73	5841.58	7384.41	7301.33	2194.44	3059.8	3533.7	497.341	509.089	630.563	19.4996	14.7746	17.8231	14.521	14.725	14.1415	14.8316	16.4218
pgaptmp_004708	pgaptmp_004708	choW	protein_coding	protein_coding	pgaptmp_004708	0.4792	843	GO:0055085		GO:0016020	TRUE	1.71567	8.09114e-07	1.45226e-05	Chromosome_II	1624544	1625386	843	-	6.47988	43.9426	39.6053	42.4752	57.6548	66.2248	57.7268	52.7145	86.5705	77.4135	131.17	137.873	96.3347	169.385	176.48	163.364	215.736	199.726	193.156	50.2929	55.4327	61.4778	2.14791	1.94163	2.10305	3.68444	4.06197	3.35184	2.97739	4.46252
pgaptmp_000861	pgaptmp_000861	wrbA	protein_coding	protein_coding	pgaptmp_000861	0.4817	573		GO:0003955,GO:0010181		TRUE	-2.09329	8.15286e-07	1.45386e-05	Chromosome_I	910616	911188	573	-	9.92735	2031.38	1732.07	1799.48	1318.37	1396.18	702.618	1392.85	1325.42	1471.56	667.959	685.738	565.04	882.275	1215.38	1163.31	308.435	288.937	346.623	1102.53	1354.6	1680.67	146.081	124.926	131.079	123.95	125.989	60.0202	115.74	100.517
pgaptmp_004389	pgaptmp_004389	pgaptmp_004389	protein_coding	protein_coding	pgaptmp_004389	0.4604	417				TRUE	2.20437	8.15535e-07	1.45386e-05	Chromosome_II	1254251	1254667	417	-	5.44294	19.2731	24.6433	27.7722	16.0152	33.4537	42.0581	34.153	46.2705	40.8181	76.6841	88.892	61.1355	91.3206	57.7167	54.0156	111.239	121.167	100.547	18.9995	19.1147	12.4617	1.90447	2.44233	2.77982	2.069	4.14813	4.93681	3.89965	4.82176
pgaptmp_000272	pgaptmp_000272	astD	protein_coding	protein_coding	pgaptmp_000272	0.5226	1458	GO:0006527	GO:0043824		TRUE	2.35365	8.21767e-07	1.46003e-05	Chromosome_I	287390	288847	1458	+	7.4944	195.814	117.056	158.465	115.95	127.67	98.9602	115.823	195.53	114.009	199.782	297.516	183.407	407.997	317.442	378.109	306.749	468.69	474.953	79.351	67.5387	77.2627	5.53408	3.318	4.53646	4.28428	4.52769	3.32228	3.78243	5.82765
pgaptmp_004166	pgaptmp_004166	pgaptmp_004166	protein_coding	protein_coding	pgaptmp_004166	0.4657	1518				TRUE	-1.66487	8.35137e-07	1.47878e-05	Chromosome_II	1006678	1008195	1518	+	6.62481	81.7178	80.9708	92.3019	168.48	167.951	126.174	100.974	141.05	143.567	80.7201	45.353	50.02	67.754	78.8055	71.1425	60.6757	62.5808	55.5655	208.995	204.528	213.511	2.21821	2.20444	2.53793	5.97917	5.72079	4.06848	3.16717	4.03775
pgaptmp_002274	pgaptmp_002274	pgaptmp_002274	protein_coding	protein_coding	pgaptmp_002274	0.4532	1560				TRUE	1.52485	8.4381e-07	1.48913e-05	Chromosome_I	2468422	2469981	1560	+	8.73857	393.171	335.325	341.435	244.072	304.497	225.135	174.477	226.875	203.386	805.183	856.265	805.877	930.881	996.723	911.678	721.366	729.665	728.967	240.288	230.014	272.496	10.3852	8.88346	9.13534	8.42864	10.0926	7.06399	5.32534	6.31973
pgaptmp_005091	pgaptmp_005091	pgaptmp_005091	protein_coding	protein_coding	pgaptmp_005091	0.4468	1587	GO:0009401	GO:0008982	GO:0016020	TRUE	-1.91171	8.51094e-07	1.49696e-05	Chromosome_II	2052599	2054185	1587	-	7.21972	283.7	254.354	249.133	272.899	276.505	183.901	324.454	373.149	385.66	50.4501	65.3084	68.5459	83.9561	59.9366	57.968	70.7883	59.9178	60.8575	229.671	298.19	267.512	7.36614	6.62373	6.55233	9.26381	9.00888	5.67205	9.73439	10.2175
pgaptmp_000893	pgaptmp_000893	fliF	protein_coding	protein_coding	pgaptmp_000893	0.4951	1743	GO:0001539	GO:0005198	GO:0009431	TRUE	1.69914	8.67145e-07	1.52011e-05	Chromosome_I	940256	941998	1743	+	11.3698	2247.24	2118.44	2256.9	1344	1491.08	1534.71	1320.83	1548.57	1505.34	4463.82	5384.31	5166.88	5776.77	4719.45	5186.82	4618.09	4861.33	5342.23	1489.79	1350.14	1725.53	53.1264	50.2297	54.0451	41.5399	44.2331	43.0984	36.0814	38.6074
pgaptmp_002906	pgaptmp_002906	ilvN	protein_coding	protein_coding	pgaptmp_002906	0.4747	495	GO:0009082	GO:1990610		TRUE	1.70169	8.70424e-07	1.52078e-05	Chromosome_I	3161202	3161696	495	-	10.0313	572.025	495.506	553.811	748.231	833.613	687.774	769.928	1204.52	1104.2	1237.04	1326.12	1435.76	2315.42	1953.49	2014.39	1862.41	1857.45	2239.82	548.193	601.477	671.271	47.6176	41.37	46.6979	81.4319	87.0769	68.01	74.059	105.742
pgaptmp_000875	pgaptmp_000875	pgaptmp_000875	protein_coding	protein_coding	pgaptmp_000875	0.4745	333				TRUE	-2.56917	8.87551e-07	1.54557e-05	Chromosome_I	921197	921529	333	-	9.57773	1542.62	1886.97	1925.27	1941.04	1753.93	1093.51	1645.29	1671.71	1762.21	203.818	272.118	187.112	182.641	304.123	247.681	332.031	296.926	340.008	1380.82	2481.73	2034.58	190.885	234.187	241.317	314.019	272.341	160.735	235.25	218.149
pgaptmp_004738	pgaptmp_004738	pgaptmp_004738	protein_coding	protein_coding	pgaptmp_004738	0.4251	207				TRUE	-2.43545	8.91516e-07	1.54598e-05	Chromosome_II	1654677	1654883	207	-	9.48004	77.0923	80.0906	102.104	1835.98	1136.74	2291.75	2096.7	1313.48	1534.9	1049.36	772.816	1287.55	440.401	350.74	500.632	407.875	383.474	449.816	2979.58	1812.08	2052.03	15.3461	15.9902	20.5879	477.818	283.946	541.914	482.279	275.735
pgaptmp_005061	pgaptmp_005061	pgaptmp_005061	protein_coding	protein_coding	pgaptmp_005061	0.4856	900				TRUE	1.61912	8.93661e-07	1.54598e-05	Chromosome_II	2024461	2025360	900	+	7.07329	83.2597	71.2895	72.6979	109.544	122.891	88.2395	106.914	111.945	103.453	167.494	152.386	146.355	241.558	219.767	205.523	300.008	278.285	292.381	93.3213	80.2818	92.2167	3.81198	3.27359	3.37148	6.55708	7.06029	4.79903	5.65619	5.40503
pgaptmp_005275	pgaptmp_005275	pgaptmp_005275	protein_coding	protein_coding	pgaptmp_005275	0.4041	1611				TRUE	-1.96141	9.12375e-07	1.57004e-05	Chromosome_II	2258898	2260508	1611	+	8.45497	538.104	705.854	693.489	914.789	772.167	800.753	1047.61	858.243	954.298	127.134	175.97	135.239	92.7936	107.664	96.1741	180.342	133.151	132.299	663.866	544.132	603.978	13.7635	18.1076	17.9674	30.5907	24.7833	24.3297	30.9625	23.15
pgaptmp_004425	pgaptmp_004425	nirD	protein_coding	protein_coding	pgaptmp_004425	0.4969	324				TRUE	-3.30944	9.13541e-07	1.57004e-05	Chromosome_II	1295160	1295483	324	-	7.6191	627.531	462.941	524.405	820.62	749.637	620.151	679.348	1097.06	938.111	54.4861	59.866	88.9244	29.4583	43.2875	36.8887	21.9107	38.6137	38.3667	296.728	375.286	570.747	79.8084	59.0504	67.5559	136.446	119.633	93.6882	99.8344	147.137
pgaptmp_002468	pgaptmp_002468	pgaptmp_002468	protein_coding	protein_coding	pgaptmp_002468	0.4623	915			GO:0016020	TRUE	-1.71645	9.30931e-07	1.59326e-05	Chromosome_I	2684116	2685030	915	+	9.76516	2413.76	2297.11	2423.54	1301.72	1211.16	742.202	1534.66	2065.01	1794.59	764.823	633.128	535.399	615.678	824.683	613.933	224.163	262.307	232.846	733.159	774.783	929.644	108.7	103.753	110.553	76.6407	68.4424	39.7039	79.859	98.0703
pgaptmp_000264	pgaptmp_000264	pgaptmp_000264	protein_coding	protein_coding	pgaptmp_000264	0.4614	687	GO:0005975	GO:0008967		TRUE	1.50794	9.33113e-07	1.59326e-05	Chromosome_I	276703	277389	687	+	10.6865	1103.19	1084.3	1166.43	998.709	1009.07	959.914	824.87	904.513	875.477	2685.96	2354.73	2991.93	2951.72	2862.53	3234.35	3439.97	3592.4	3445.06	1181.32	1129.68	1369.13	66.1686	65.2283	70.8671	78.3153	75.9469	68.3925	57.1691	57.2131
pgaptmp_002066	pgaptmp_002066	pgaptmp_002066	protein_coding	protein_coding	pgaptmp_002066	0.486	1356				TRUE	1.87102	9.51785e-07	1.61988e-05	Chromosome_I	2230389	2231744	1356	-	10.9375	1691.4	1361.54	1533.19	906.461	1077.35	707.566	943.663	1188.85	1109.83	3361.99	3352.5	3729.27	6152.36	5799.42	5931.18	3375.93	3670.96	4070.84	920.36	898.392	1217.09	51.398	41.4966	47.193	36.0125	41.0809	25.5411	33.1352	38.0983
pgaptmp_000188	pgaptmp_000188	pgaptmp_000188	protein_coding	protein_coding	pgaptmp_000188	0.502	3432				TRUE	1.72814	9.57716e-07	1.62472e-05	Chromosome_I	202833	206264	3432	+	8.82964	355.395	416.295	362.673	311.336	313.373	371.926	435.822	444.047	415.218	286.557	277.561	326.056	966.231	947.886	803.647	864.628	1046.56	990.919	251.465	305.836	303.235	4.267	5.01298	4.41071	4.88704	4.72126	5.30446	6.04637	5.62237
pgaptmp_000660	pgaptmp_000660	pgaptmp_000660	protein_coding	protein_coding	pgaptmp_000660	0.4546	3141		GO:0022857	GO:0016020	TRUE	1.51594	9.63821e-07	1.62982e-05	Chromosome_I	680964	684104	3141	+	9.76284	740.086	828.19	796.41	568.86	753.051	591.287	677.864	666.444	655.2	898.012	1084.84	1031.89	1545.09	1328.59	1418.9	1575.88	1540.55	1391.78	525.84	546.044	488.499	9.70895	10.8969	10.583	9.75668	12.3965	9.21432	10.2756	9.22005
pgaptmp_002017	pgaptmp_002017	torE	protein_coding	protein_coding	pgaptmp_002017	0.4611	180	GO:0009061			TRUE	-2.41901	9.67952e-07	1.63156e-05	Chromosome_I	2185833	2186012	180	-	6.93182	376.21	419.816	477.029	160.793	170	112.155	387.563	361.208	363.14	42.3781	47.1672	57.4303	30.9312	26.6385	36.8887	32.0233	39.9452	52.9196	219.612	264.42	310.712	86.1225	96.3891	110.615	48.1236	48.8337	30.4985	102.518	87.2012
pgaptmp_000482	pgaptmp_000482	hemW	protein_coding	protein_coding	pgaptmp_000482	0.4902	1173	GO:0006779	GO:0051539,GO:0051989	GO:0005737	TRUE	1.64174	9.74265e-07	1.63695e-05	Chromosome_I	505413	506585	1173	-	10.0775	856.495	758.661	801.311	441.379	549.597	467.587	521.947	562.709	520.078	1943.34	2089.87	2299.07	2685.12	2717.12	3007.75	1958.48	1933.35	2391.96	632.014	659.458	711.149	30.0874	26.7295	28.5131	20.2711	24.2265	19.5118	21.1866	20.846
pgaptmp_001523	pgaptmp_001523	pgaptmp_001523	protein_coding	protein_coding	pgaptmp_001523	0.4538	465		GO:0003677		TRUE	-1.9074	9.94326e-07	1.66534e-05	Chromosome_I	1583181	1583645	465	-	9.04824	1235.79	1685.42	1786.41	826.385	663.613	997.024	1047.61	840.331	780.469	324.899	306.587	337.172	207.681	205.338	183.126	210.679	213.041	189.187	891.861	823.844	657.148	109.509	149.795	160.35	95.7401	73.7914	104.951	107.27	78.5299
pgaptmp_001026	pgaptmp_001026	rsxD	protein_coding	protein_coding	pgaptmp_001026	0.4814	1047	GO:0022900,GO:0055085		GO:0016020	TRUE	1.58885	1.00271e-06	1.67404e-05	Chromosome_I	1085350	1086396	1047	-	10.8505	1633.59	1407.31	1565.86	853.931	1001.56	960.739	1147.84	1288.11	1102.79	2962.43	3524.84	3334.66	3505.53	3135.57	3417.48	3325.36	3547.13	3495.34	1029.33	1097.82	1315.96	64.2915	55.55	62.4236	43.938	49.4625	44.915	52.1996	53.4618
pgaptmp_004276	pgaptmp_004276	pgaptmp_004276	protein_coding	protein_coding	pgaptmp_004276	0.4582	3060		GO:0022857	GO:0016020	TRUE	1.57946	1.03891e-06	1.72411e-05	Chromosome_II	1125988	1129047	3060	+	10.2597	893.499	870.436	864.207	494.55	576.224	628.397	762.504	858.243	761.468	2708.16	3238.21	3017.87	2648.3	2142.18	2051.28	2116.91	2360.76	2041.37	661.072	695.776	814.997	12.0318	11.7559	11.7879	8.70669	9.73674	10.0518	11.8646	12.1878
pgaptmp_000338	pgaptmp_000338	pspG	protein_coding	protein_coding	pgaptmp_000338	0.3843	216				TRUE	2.27419	1.03925e-06	1.72411e-05	Chromosome_I	356611	356826	216	+	10.4544	641.408	770.102	795.593	459.316	509.316	731.481	709.047	558.231	556.674	5543.46	5101.31	5040.9	3362.66	3161.1	3160.57	4152.91	3432.62	3163.27	846.039	787.526	563.27	122.36	147.345	153.737	114.557	121.921	165.761	156.298	112.305
pgaptmp_002743	pgaptmp_002743	raiA	protein_coding	protein_coding	pgaptmp_002743	0.4159	327	GO:0009386,GO:0036211	GO:0045182	GO:0005840	TRUE	-4.17057	1.05089e-06	1.73793e-05	Chromosome_I	2970164	2970490	327	+	14.2632	101754	129152	156216	106241	89263.5	124741	221811	128947	155399	456.069	1823.19	765.12	889.64	718.129	999.947	5358	4138.32	9796.73	137144	112795	98698.5	12822.2	16322.8	19939.7	17502.9	14114.6	18672.1	32297.4	17135.6
pgaptmp_000892	pgaptmp_000892	fliE	protein_coding	protein_coding	pgaptmp_000892	0.4647	312	GO:0071973	GO:0003774	GO:0009431	TRUE	1.65465	1.06552e-06	1.75661e-05	Chromosome_I	939930	940241	312	+	10.4104	1205.72	1158.23	1286.51	906.461	860.239	1124.02	960.74	941.082	909.257	1917.1	1614.57	1858.15	1770.44	1796.99	1857.61	3227.61	2548.5	2586.44	935.448	860.8	843.243	159.24	153.42	172.107	156.516	142.564	176.341	146.617	131.072
pgaptmp_000077	pgaptmp_000077	xerC	protein_coding	protein_coding	pgaptmp_000077	0.5117	942	GO:0006310,GO:0007059,GO:0015074,GO:0051301	GO:0003677		TRUE	2.10039	1.06918e-06	1.75712e-05	Chromosome_I	84006	84947	942	+	10.3525	1033.81	863.395	855.222	591.922	656.786	606.956	589.511	798.539	753.726	1515.52	1663.55	1791.46	4196.33	3520.72	3682.28	2811.31	3162.33	4135.66	729.247	719.351	900.567	45.2217	37.8791	37.8939	33.8515	36.0509	31.5384	29.7971	36.8369
pgaptmp_000776	pgaptmp_000776	pgaptmp_000776	protein_coding	protein_coding	pgaptmp_000776	0.4393	585				TRUE	3.08182	1.07409e-06	1.7597e-05	Chromosome_I	822191	822775	585	+	10.548	625.218	719.055	748.217	661.749	591.244	740.552	651.878	633.607	624.938	2286.4	5208.34	3175.34	6638.42	3064.53	4858.77	3901.78	7831.92	5494.37	738.747	707.245	569.085	44.0387	50.7982	53.3842	60.9399	52.2582	61.963	53.057	47.0654
pgaptmp_002418	pgaptmp_002418	pgaptmp_002418	protein_coding	protein_coding	pgaptmp_002418	0.4329	231				TRUE	-1.9119	1.09186e-06	1.7807e-05	Chromosome_I	2629021	2629251	231	-	10.377	1763.87	2297.99	1980.81	1908.37	1686.34	2019.61	2175.4	1611.26	1841.03	1428.75	1369.66	1361.65	618.624	556.078	526.982	684.287	644.449	463.046	2247.53	2330.08	2243.94	314.639	411.128	357.909	445.057	377.466	427.946	448.394	303.103
pgaptmp_000813	pgaptmp_000813	pgaptmp_000813	protein_coding	protein_coding	pgaptmp_000813	0.466	294				TRUE	-1.72951	1.09368e-06	1.7807e-05	Chromosome_I	858724	859017	294	-	9.15893	682.267	892.439	743.316	832.151	591.926	785.085	1060.23	756	886.033	373.331	342.869	333.466	268.07	356.29	353.078	293.266	298.257	374.406	1161.21	1044.3	1070.88	95.6236	125.451	105.528	152.482	104.103	130.708	171.706	111.741
pgaptmp_005202	pgaptmp_005202	nfsA	protein_coding	protein_coding	pgaptmp_005202	0.4398	723		GO:0016491		TRUE	-1.70512	1.10232e-06	1.78416e-05	Chromosome_II	2172908	2173630	723	+	9.59362	834.138	1083.42	1039.01	1589.35	1394.13	1759.84	1923.71	1497.07	1768.55	349.115	469.857	314.94	300.474	370.719	371.522	392.706	354.181	392.928	1430.55	1232.9	1116.57	47.5399	61.9301	59.9821	118.426	99.7034	119.143	126.687	89.9792
pgaptmp_005030	pgaptmp_005030	pgaptmp_005030	protein_coding	protein_coding	pgaptmp_005030	0.4481	549			GO:0016020	TRUE	2.03597	1.10259e-06	1.78416e-05	Chromosome_II	1988446	1988994	549	+	10.6836	541.188	504.307	561.98	769.371	911.444	1348.33	706.077	614.949	572.156	5254.88	5950.32	5924.59	3437.78	3096.72	3596.65	5464.18	4637.64	3769.2	1198.09	941.719	1229.56	40.6194	37.9633	42.7257	75.4966	85.8423	120.215	61.2368	48.6748
pgaptmp_001751	pgaptmp_001751	pgaptmp_001751	protein_coding	protein_coding	pgaptmp_001751	0.4237	963	GO:0009966	GO:0009975		TRUE	-1.67793	1.11109e-06	1.78419e-05	Chromosome_I	1847518	1848480	963	-	9.78314	1778.52	2389.52	2223.41	1875.06	2004.49	2408.86	2205.84	1914.25	1976.86	359.205	335.612	294.562	273.962	247.516	246.364	448.326	367.496	414.096	1450.11	1348.22	1197.16	76.101	102.548	96.3685	104.895	107.627	122.438	109.064	86.3795
pgaptmp_000644	pgaptmp_000644	pgaptmp_000644	protein_coding	protein_coding	pgaptmp_000644	0.4724	2409				TRUE	1.98368	1.11591e-06	1.78419e-05	Chromosome_I	657835	660243	2409	-	8.50867	440.197	328.284	301.411	199.229	263.534	170.706	148.491	311.952	264.614	339.025	357.382	398.307	951.502	800.264	894.551	724.737	856.158	812.315	173.79	169.484	245.911	7.52954	5.63189	5.22231	4.45534	5.65644	3.46853	2.93493	5.62716
pgaptmp_000615	pgaptmp_000615	pdhR	protein_coding	protein_coding	pgaptmp_000615	0.4583	768				TRUE	1.84855	1.12072e-06	1.78419e-05	Chromosome_I	619052	619819	768	+	13.9172	11255.5	10359	9931.03	4666.19	6396.49	6988.24	6169.82	7383.12	6568.19	43891.6	46096.8	52567.3	40148.7	38674.6	41191.5	31947.4	31455.5	30026.6	8654.85	7561.78	9799.07	603.894	557.439	539.727	327.315	430.65	445.389	382.511	417.75
pgaptmp_004585	pgaptmp_004585	pgaptmp_004585	protein_coding	protein_coding	pgaptmp_004585	0.4432	1893				TRUE	-1.61328	1.12282e-06	1.78419e-05	Chromosome_II	1473396	1475288	1893	-	9.42294	1285.13	1191.68	1070.87	1267.12	1104.66	938.473	1288.91	1691.86	1466.63	522.663	495.255	413.128	304.893	342.97	229.237	294.951	318.23	273.859	936.007	817.473	1026.02	27.974	26.0166	23.6116	36.0606	30.1731	24.2663	32.4193	38.8374
pgaptmp_000774	pgaptmp_000774	pgaptmp_000774	protein_coding	protein_coding	pgaptmp_000774	0.4657	597				TRUE	3.72979	1.12324e-06	1.78419e-05	Chromosome_I	820215	820811	597	+	7.01496	39.3171	52.807	46.5594	39.0771	36.1847	44.5321	39.3502	35.8223	37.2993	199.782	741.976	452.032	1110.58	429.545	721.965	402.819	954.69	722.352	53.6458	44.601	33.2313	2.71372	3.6556	3.25517	3.52624	3.13396	3.65117	3.13838	2.60745
pgaptmp_000777	pgaptmp_000777	pgaptmp_000777	protein_coding	protein_coding	pgaptmp_000777	0.4359	663	GO:0045892	GO:0016989		TRUE	2.64281	1.12579e-06	1.78419e-05	Chromosome_I	822772	823434	663	+	9.79266	417.069	413.655	460.693	458.035	388.473	365.328	373.456	360.462	362.436	1481.21	2730.25	1767.37	3079.86	1769.24	2478.13	2191.07	4061.09	3060.07	491.194	529.478	451.945	25.9211	25.785	29.0027	37.2177	30.2964	26.9713	26.82	23.6256
pgaptmp_002757	pgaptmp_002757	pgaptmp_002757	protein_coding	protein_coding	pgaptmp_002757	0.4825	342				TRUE	-1.67888	1.12857e-06	1.78419e-05	Chromosome_I	2984784	2985125	342	-	10.0844	1729.18	2352.55	2321.43	1697.61	1282.17	1712.84	2528.81	2021.72	2074.68	377.367	417.248	442.769	531.722	536.099	479.553	615.184	605.835	576.823	2237.48	1850.3	1733.01	208.34	284.286	283.316	267.409	193.848	245.145	352.065	256.881
pgaptmp_004798	pgaptmp_004798	pgaptmp_004798	protein_coding	protein_coding	pgaptmp_004798	0.4762	672			GO:0005886,GO:0016020	TRUE	-1.83458	1.12983e-06	1.78419e-05	Chromosome_II	1722895	1723566	672	+	9.71334	1161.01	1491.8	1639.38	2016.64	1772.37	1821.69	1807.14	1500.8	1509.56	381.403	388.222	455.737	310.785	288.583	358.347	342.143	398.12	411.45	1334.44	1608.82	1242.85	71.1909	91.745	101.824	161.667	136.373	132.69	128.043	97.0493
pgaptmp_002936	pgaptmp_002936	pgaptmp_002936	protein_coding	protein_coding	pgaptmp_002936	0.4764	2580				TRUE	-2.25391	1.13315e-06	1.78419e-05	Chromosome_I	3193584	3196163	2580	+	12.4217	9798.43	14504.3	15508.4	11097.3	10360.4	13197.2	15958.4	14517	13766.2	1743.56	1774.21	1739.58	1811.68	1985.68	2088.16	1712.4	1864.11	2570.57	10068.6	10568.5	8856.13	156.493	232.338	250.892	231.718	207.635	250.377	294.511	244.509
pgaptmp_004619	pgaptmp_004619	hsdR	protein_coding	protein_coding	pgaptmp_004619	0.4652	3549				TRUE	1.68004	1.13839e-06	1.7871e-05	Chromosome_II	1521412	1524960	3549	-	10.4597	1223.45	977.81	963.044	944.257	1063.69	790.033	1122.6	1504.54	1396.26	1872.71	2175.13	1711.79	2215.26	2361.94	2150.08	2553.43	2428.67	2614.23	681.19	746.111	935.46	14.205	11.3865	11.3261	14.3334	15.4972	10.8961	15.0609	18.4219
pgaptmp_004446	pgaptmp_004446	pgaptmp_004446	protein_coding	protein_coding	pgaptmp_004446	0.4341	516		GO:0046872		TRUE	-2.00444	1.14688e-06	1.78985e-05	Chromosome_II	1314837	1315352	516	+	8.42546	547.355	561.515	448.44	741.184	643.131	419.756	524.175	664.951	620.012	191.71	163.271	159.323	262.179	346.3	420.268	91.0135	115.841	129.653	457.107	431.993	554.131	43.7097	44.9731	36.274	77.3821	64.4457	39.8181	48.3681	55.9987
pgaptmp_003959	pgaptmp_003959	pgaptmp_003959	protein_coding	protein_coding	pgaptmp_003959	0.43	600		GO:0015035		TRUE	-1.58225	1.14694e-06	1.78985e-05	Chromosome_II	727110	727709	600	+	9.26646	763.984	806.187	889.529	1231.89	1106.7	1048.98	1117.4	1081.39	1130.24	405.619	388.222	346.435	296.056	347.41	329.363	303.378	262.307	317.517	843.245	951.276	909.706	52.4676	55.5298	61.8799	110.608	95.3727	85.5752	88.6726	78.3189
pgaptmp_002979	pgaptmp_002979	rpmD	protein_coding	protein_coding	pgaptmp_002979	0.4011	177	GO:0006412	GO:0003735	GO:0015934	TRUE	3.0698	1.15379e-06	1.7952e-05	Chromosome_I	3236726	3236902	177	-	16.2938	78969.5	51749.1	40506.6	20874.2	33728.2	14765.7	21304.8	52283.4	42215.7	251552	285379	332034	256508	236127	264754	241693	233774	257177	23726	22938.3	41161.1	18384.2	12082.9	9551.99	6353.33	9852.89	4083.32	5731.09	12835.9
pgaptmp_001870	pgaptmp_001870	pgaptmp_001870	protein_coding	protein_coding	pgaptmp_001870	0.4998	2811		GO:0005524,GO:0140662		TRUE	2.12749	1.15988e-06	1.79936e-05	Chromosome_I	2004075	2006885	2811	+	10.9947	1699.88	1285.85	1360.02	785.386	951.042	823.019	940.693	1382.89	1223.13	3606.17	3452.27	3523.63	6763.62	6465.38	6974.6	3758.52	4046.45	5381.92	918.125	906.675	1188.85	24.9182	18.9048	20.1942	15.0517	17.4937	14.3312	15.9338	21.3779
pgaptmp_002037	pgaptmp_002037	hisC	protein_coding	protein_coding	pgaptmp_002037	0.4621	1041	GO:0000105	GO:0004400		TRUE	2.05589	1.16368e-06	1.79994e-05	Chromosome_I	2201884	2202924	1041	-	9.26223	649.117	584.398	476.212	315.82	469.035	293.582	355.637	600.023	499.669	895.994	975.997	863.307	1132.67	970.084	1106.66	1304.53	1215.66	1193.34	217.936	308.384	350.59	25.6939	23.2006	19.0937	16.3438	23.2969	13.8042	16.2663	25.047
pgaptmp_000167	pgaptmp_000167	pgaptmp_000167	protein_coding	protein_coding	pgaptmp_000167	0.4499	2136				TRUE	-3.93379	1.17051e-06	1.80519e-05	Chromosome_I	175317	177452	2136	+	11.6924	37357.4	24299.1	13655	8538.03	11341.5	2545.75	4567.6	13302	10755.6	583.203	640.385	570.598	645.136	643.763	607.346	726.423	764.284	903.602	7338.3	10541.1	19437	720.665	470.145	266.827	215.338	274.545	58.3375	101.817	270.616
pgaptmp_003361	pgaptmp_003361	gltS	protein_coding	protein_coding	pgaptmp_003361	0.4717	1236	GO:0015813	GO:0015501	GO:0016020	TRUE	1.52426	1.17601e-06	1.80622e-05	Chromosome_II	96836	98071	1236	-	12.3498	2692.83	2366.63	2711.88	2898.75	2620.32	3948.51	3303.94	3780.74	3489.94	11139.4	8700.53	11487.9	9793.4	8416.65	9458	11162.6	10327.2	10331.2	3621.09	3790.45	3653.78	89.7737	79.1324	91.5783	126.345	109.617	156.368	127.276	132.922
pgaptmp_004352	pgaptmp_004352	pgaptmp_004352	protein_coding	protein_coding	pgaptmp_004352	0.4141	990		GO:0005524,GO:0008716,GO:0046872		TRUE	-1.75059	1.17805e-06	1.80622e-05	Chromosome_II	1218183	1219172	990	+	11.7872	3961.77	4418.19	4214.85	6450.93	5437.94	4602.48	6261.88	5913.66	5985.47	2425.64	2400.08	2804.82	1570.13	2088.9	1765.39	2005.67	1561.86	1845.57	6776.13	5722.31	5800.52	164.897	184.438	177.7	351.036	284.016	227.556	301.164	259.573
pgaptmp_005287	pgaptmp_005287	pgaptmp_005287	protein_coding	protein_coding	pgaptmp_005287	0.4795	1026	GO:0055085	GO:0022857	GO:0016020	TRUE	-2.054	1.20039e-06	1.83514e-05	Chromosome_II	2272075	2273100	1026	-	9.72261	1055.39	842.272	980.197	1077.5	1116.95	810.649	1147.1	1467.97	1616.54	807.201	1179.18	824.403	415.362	384.038	395.236	345.514	440.728	377.052	1358.47	1549.57	2037.91	42.3863	33.9271	39.8756	56.5764	56.2896	38.6739	53.2335	62.1737
pgaptmp_000319	pgaptmp_000319	pgaptmp_000319	protein_coding	protein_coding	pgaptmp_000319	0.4332	1752				TRUE	-1.5235	1.21191e-06	1.84737e-05	Chromosome_I	337388	339139	1752	+	9.31175	1276.65	1549.01	1600.17	904.539	874.576	870.85	1083.99	1153.03	1079.57	272.43	288.445	287.152	362.337	313.002	295.11	337.087	320.893	329.424	1038.27	971.665	882.29	30.0258	36.5393	38.1218	27.8136	25.8112	24.33	29.4593	28.5985
pgaptmp_000862	pgaptmp_000862	arsC	protein_coding	protein_coding	pgaptmp_000862	0.4558	351	GO:0046685	GO:0008794		TRUE	-1.5805	1.24688e-06	1.88759e-05	Chromosome_I	911189	911539	351	-	9.8703	1412.33	1468.92	1503.79	1267.12	1143.57	1033.31	1311.92	1114.97	1241.43	633.653	636.757	559.482	768.861	1013.37	995.995	391.021	420.756	463.046	1324.38	1155.17	1403.19	165.801	172.954	178.821	194.481	168.461	144.097	177.965	138.036
pgaptmp_002862	pgaptmp_002862	yqiA	protein_coding	protein_coding	pgaptmp_002862	0.4393	585				TRUE	1.8414	1.24829e-06	1.88759e-05	Chromosome_I	3111804	3112388	585	-	10.4127	1187.99	903	1073.32	807.167	839.074	667.982	783.292	882.124	848.03	1670.91	1467.62	1639.54	2447.98	2773.73	2907.62	3210.75	2844.1	3867.1	801.334	970.391	986.968	83.6789	63.7931	76.5795	74.3313	74.1632	55.8909	63.753	65.5256
pgaptmp_004032	pgaptmp_004032	pgaptmp_004032	protein_coding	protein_coding	pgaptmp_004032	0.4345	603				TRUE	-2.10959	1.25172e-06	1.88759e-05	Chromosome_II	802504	803106	603	+	9.81973	1315.19	1853.53	2026.56	2688.63	2428.47	3355.58	3484.35	2996.39	2803.07	199.782	210.438	248.247	200.316	152.061	175.221	473.607	376.816	494.798	2258.15	2052.28	1582.64	89.8733	127.035	140.276	240.203	208.238	272.385	275.13	215.932
pgaptmp_004020	pgaptmp_004020	pgaptmp_004020	protein_coding	protein_coding	pgaptmp_004020	0.4304	309				TRUE	-2.11401	1.25265e-06	1.88759e-05	Chromosome_II	788640	788948	309	-	10.3738	1814.75	1780.48	1764.35	2349.75	3291.44	1554.5	2121.94	2553.08	2674.99	1059.45	1206.39	1067.09	905.842	939.006	910.361	379.223	404.778	428.648	1384.17	1714.59	2273.02	242.001	238.133	238.324	409.664	550.771	246.244	326.97	359.041
pgaptmp_002835	pgaptmp_002835	ftsW	protein_coding	protein_coding	pgaptmp_002835	0.4645	1197	GO:0051301			TRUE	1.61813	1.27269e-06	1.9123e-05	Chromosome_I	3082264	3083460	1197	-	11.7123	2524	2466.09	2411.28	1659.18	2016.1	2432.77	1891.78	2168	1948.01	4633.34	5480.46	6006.1	7956.68	5650.69	6433.13	6204.09	6266.07	6988.03	1916.16	2023.61	2406.77	86.8868	85.1444	84.0805	74.6728	87.0887	99.481	75.2505	78.7049
pgaptmp_003132	pgaptmp_003132	glnG	protein_coding	protein_coding	pgaptmp_003132	0.485	1404	GO:0006355	GO:0043565		TRUE	1.42624	1.31285e-06	1.96703e-05	Chromosome_I	3390851	3392254	1404	+	9.83557	699.998	660.968	638.762	558.611	695.019	611.904	881.297	850.78	883.922	1188.6	1563.77	1239.38	1131.2	1123.26	1212.06	1614.65	1615.12	1614.05	538.693	598.291	654.656	20.5441	19.4561	18.9895	21.4342	25.5961	21.3329	29.8874	26.3322
pgaptmp_003153	pgaptmp_003153	pgaptmp_003153	protein_coding	protein_coding	pgaptmp_003153	0.4914	2448				TRUE	1.87166	1.32156e-06	1.97446e-05	Chromosome_I	3416419	3418866	2448	+	10.4132	1140.19	1046.46	939.355	814.854	880.721	712.514	729.836	860.481	798.063	1465.07	1278.96	1385.74	3358.24	4197.78	4215.85	2696.7	2764.21	3622.34	759.423	772.872	942.106	19.1922	17.6666	16.0162	17.9322	18.6025	14.2467	14.1954	15.2745
pgaptmp_002325	pgaptmp_002325	pgaptmp_002325	protein_coding	protein_coding	pgaptmp_002325	0.4536	873				TRUE	-1.58109	1.32872e-06	1.97953e-05	Chromosome_I	2526228	2527100	873	-	12.0658	6547.45	6925.64	7563.85	5643.76	5070.63	4119.22	6880.35	6922.66	7273.35	3162.21	3911.25	3395.8	2085.65	2585.04	2727.13	1983.76	1995.93	2255.7	5618.28	6644.28	6503.36	309.041	327.859	361.634	348.272	300.325	230.958	375.257	344.585
pgaptmp_002976	pgaptmp_002976	rpmJ	protein_coding	protein_coding	pgaptmp_002976	0.4474	114	GO:0006412	GO:0003735	GO:0005840	TRUE	2.99708	1.33618e-06	1.98503e-05	Chromosome_I	3234779	3234892	114	-	15.0781	30835.4	20904.5	17335.6	11432.9	13708.5	8635.11	10046.2	20947.1	18689	129035	107494	142053	106639	91130.2	93507.6	104160	94132.1	106961	9987.06	10181.8	18303.8	11145.6	7578.4	6347.09	5402.78	6217.7	3707.62	4195.94	7984.66
pgaptmp_000199	pgaptmp_000199	pgaptmp_000199	protein_coding	protein_coding	pgaptmp_000199	0.4875	519				TRUE	-2.47172	1.34497e-06	1.99239e-05	Chromosome_I	218054	218572	519	+	11.8359	6119.58	7477.47	8599.6	5788.54	6020.31	6919.79	9492.32	8764.52	8871.59	1783.92	2242.25	1845.18	2474.5	1582.77	1807.55	763.502	1186.37	1104.7	4794.03	6890.22	5442.45	485.862	595.428	691.595	600.85	599.785	652.617	870.838	733.835
pgaptmp_003186	pgaptmp_003186	pgaptmp_003186	protein_coding	protein_coding	pgaptmp_003186	0.4679	1716				TRUE	1.38255	1.34872e-06	1.99239e-05	Chromosome_I	3456353	3458068	1716	-	10.4595	1894.93	1990.82	2057.6	1026.25	1220.72	1401.94	1263.66	1304.53	1203.43	1467.09	1692.58	1704.38	1969.29	1666.01	1617.83	1761.28	1882.75	1873.35	663.308	728.271	713.641	45.5023	47.9465	50.0477	32.2183	36.7826	39.9893	35.0628	33.035
pgaptmp_002676	pgaptmp_002676	pgaptmp_002676	protein_coding	protein_coding	pgaptmp_002676	0.4	225				TRUE	-1.48337	1.36023e-06	2.00376e-05	Chromosome_I	2899602	2899826	225	-	9.52975	1203.41	1219.84	1457.23	1168.47	1029.56	975.583	1743.29	1143.33	1121.79	343.061	330.17	300.12	217.991	406.237	368.887	493.833	440.728	501.413	1418.82	1225.89	1429.77	220.389	224.059	270.324	279.769	236.598	212.234	368.909	220.814
pgaptmp_005268	pgaptmp_005268	pgaptmp_005268	protein_coding	protein_coding	pgaptmp_005268	0.4838	711		GO:0016787		TRUE	-2.73707	1.38167e-06	2.02423e-05	Chromosome_II	2253011	2253721	711	+	7.42657	813.323	609.921	487.648	510.565	588.513	250.699	557.585	670.175	694.611	32.2881	47.1672	27.7889	35.3499	44.3975	43.476	55.6194	37.2822	51.5966	256.494	393.126	469.392	47.1359	35.4524	28.6271	38.6853	42.7987	17.259	37.34	40.9597
pgaptmp_004818	pgaptmp_004818	pgaptmp_004818	protein_coding	protein_coding	pgaptmp_004818	0.4537	540		GO:0016209,GO:0016491		TRUE	-2.13149	1.38534e-06	2.02423e-05	Chromosome_II	1747639	1748178	540	+	8.66918	593.611	721.696	812.747	894.93	658.834	857.655	1412.9	1121.69	1213.99	179.602	156.014	129.681	167.912	134.302	192.348	112.924	187.742	153.467	719.189	663.281	712.81	45.2966	55.2334	62.8206	89.2811	63.085	77.7413	124.58	90.2641
pgaptmp_002773	pgaptmp_002773	pgaptmp_002773	protein_coding	protein_coding	pgaptmp_002773	0.476	792				TRUE	1.57731	1.38567e-06	2.02423e-05	Chromosome_I	3002868	3003659	792	-	10.5381	1155.61	1158.23	1204.01	869.306	1002.93	1072.89	954.8	1125.42	1070.42	1830.33	1981.02	1987.83	2492.17	2187.68	2335.85	2769.17	2834.78	3335.26	900.243	1039.84	1047.62	60.1237	60.4384	63.452	59.1305	65.4771	66.3078	57.4011	61.7484
pgaptmp_005045	pgaptmp_005045	pgaptmp_005045	protein_coding	protein_coding	pgaptmp_005045	0.4534	1632				TRUE	-1.77176	1.39296e-06	2.02569e-05	Chromosome_II	2005970	2007601	1632	+	8.64938	320.704	280.757	267.921	969.881	885.5	558.301	327.424	456.734	444.776	264.358	339.241	255.658	203.262	274.154	226.602	291.58	312.904	236.815	981.271	858.888	1107.43	8.09734	7.10972	6.85215	32.0157	28.0551	16.7448	9.55262	12.1613
pgaptmp_000206	pgaptmp_000206	pfkA	protein_coding	protein_coding	pgaptmp_000206	0.4756	963	GO:0006002,GO:0006096	GO:0005524		TRUE	-1.96969	1.39437e-06	2.02569e-05	Chromosome_I	224044	225006	963	+	15.3099	72861.5	83064.5	90172.4	63310.1	60138.2	53206.8	86693.8	88557.9	84211.9	20167.9	21482.8	22155.1	18913.7	18751.3	19402.1	16119.5	16978	16964.7	56313.5	73049.5	67317.4	3117.67	3564.77	3908.3	3541.69	3229	2704.42	4286.42	3996.12
pgaptmp_003364	pgaptmp_003364	pgaptmp_003364	protein_coding	protein_coding	pgaptmp_003364	0.509	387				TRUE	1.68604	1.4062e-06	2.03725e-05	Chromosome_II	100278	100664	387	+	7.84788	102.533	99.4532	117.624	183.855	218.473	157.512	187.842	181.35	173.829	230.052	350.125	242.689	500.791	245.296	363.617	527.541	653.769	537.134	181.613	175.855	158.679	10.9172	10.6206	12.686	25.5934	29.1898	19.9221	23.1107	20.3631
pgaptmp_002515	pgaptmp_002515	smrA	protein_coding	protein_coding	pgaptmp_002515	0.4674	582				TRUE	-1.84274	1.41209e-06	2.04016e-05	Chromosome_I	2735462	2736043	582	+	9.20449	995.261	1059.66	896.063	717.482	817.227	490.678	886.494	946.306	934.593	419.745	451.716	463.148	393.268	428.435	445.299	202.252	256.981	275.182	837.656	848.694	1035.15	70.4648	75.2464	64.2624	66.4128	72.6045	41.2673	72.5246	70.6555
pgaptmp_000393	pgaptmp_000393	mreC	protein_coding	protein_coding	pgaptmp_000393	0.4736	891	GO:0008360			TRUE	1.61461	1.42292e-06	2.05018e-05	Chromosome_I	426150	427040	891	+	11.8644	2706.71	2623.63	2631.83	2299.78	2676.98	1952.82	1788.58	2233.67	2320.3	5377.98	5549.4	6435.9	7946.37	6922.67	7779.57	7181.64	7010.38	8135.06	2157.57	2540.98	2597.85	125.176	121.693	123.288	139.051	155.35	107.279	95.5792	108.938
pgaptmp_002703	pgaptmp_002703	queA	protein_coding	protein_coding	pgaptmp_002703	0.4663	1053	GO:0006400,GO:0008616	GO:0051075	GO:0005737	TRUE	1.56664	1.43594e-06	2.06329e-05	Chromosome_I	2925987	2927039	1053	-	11.5934	2749.88	2396.56	2292.84	1367.7	1869.31	1348.33	1246.59	1685.89	1595.42	5866.34	5968.46	6311.78	7202.55	6208.98	7206.47	5627.67	5987.78	5994.46	1829.54	1832.46	2290.46	107.608	94.0592	90.8839	69.9724	91.7905	62.676	56.3672	69.5725
pgaptmp_003569	pgaptmp_003569	pgaptmp_003569	protein_coding	protein_coding	pgaptmp_003569	0.489	2448		GO:0016491,GO:0043546		TRUE	-2.87289	1.46268e-06	2.09473e-05	Chromosome_II	321191	323638	2448	+	9.66619	3137.66	1877.29	1650.82	2062.76	2863.37	1283.18	1914.05	5394.99	4366.12	169.512	170.527	196.375	276.908	253.065	326.729	185.398	214.372	213.001	1002.51	1542.56	2151.72	52.8144	31.6929	28.1467	45.3943	60.4797	25.6573	37.2285	95.7671
pgaptmp_000242	pgaptmp_000242	pgaptmp_000242	protein_coding	protein_coding		0.5	1000				TRUE	2.29304	1.46579e-06	2.09473e-05	pgaptmp_000242	1	1000	1000	+	11.0201	634.469	713.775	874.009	805.245	1078.03	1540.48	651.878	641.07	547.525	6879.37	7252.86	8657.16	6022.74	3943.6	4669.06	7882.78	6709.46	5889.95	1771.99	1190.85	1193.83	26.1438	29.4987	36.4802	43.3803	55.741	75.4031	31.0384	27.8575
pgaptmp_001230	pgaptmp_001230	pgaptmp_001230	protein_coding	protein_coding	pgaptmp_001230	0.4699	549				TRUE	-2.26825	1.47219e-06	2.09796e-05	Chromosome_I	1313441	1313989	549	+	8.48241	756.275	1066.7	1042.28	632.921	613.091	649.014	1016.42	837.346	871.958	106.954	152.386	140.797	142.873	137.632	150.19	104.497	141.14	112.454	700.748	656.909	473.545	56.7631	80.2994	79.2413	62.1071	57.7426	57.8648	88.1526	66.2781
pgaptmp_000530	pgaptmp_000530	pgaptmp_000530	protein_coding	protein_coding	pgaptmp_000530	0.4513	483				TRUE	2.98784	1.48006e-06	2.09796e-05	Chromosome_I	539961	540443	483	-	7.56594	106.387	133.778	130.693	94.8101	107.189	98.1356	74.9882	90.302	76.7098	250.232	234.022	231.574	353.499	315.222	324.094	1162.95	1102.49	682.662	139.144	126.157	80.5858	9.07614	11.4467	11.294	10.5748	11.4748	9.94517	7.39228	8.12434
pgaptmp_002230	pgaptmp_002230	cmoM	protein_coding	protein_coding	pgaptmp_002230	0.4331	792				TRUE	1.43176	1.48289e-06	2.09796e-05	Chromosome_I	2416562	2417353	792	-	11.257	1790.08	1811.28	1904.85	1354.25	1459.68	1411.01	1493.82	1584.39	1510.97	4443.64	4903.57	5341.02	4186.02	4085.68	4526.77	3996.17	4003.84	4463.77	1521.08	1444.44	1653.26	93.1335	94.5153	100.387	92.1164	95.2961	87.2041	89.8063	86.931
pgaptmp_005292	pgaptmp_005292	pgaptmp_005292	protein_coding	protein_coding	pgaptmp_005292	0.4776	312				TRUE	-1.89076	1.48401e-06	2.09796e-05	Chromosome_II	2279274	2279585	312	+	7.14236	174.999	140.819	160.916	246.634	180.923	178.953	225.707	246.278	274.466	113.008	81.6355	122.271	100.158	98.7843	89.5869	53.9339	55.9232	62.1805	193.907	254.863	266.681	23.1121	18.6529	21.5271	42.5856	29.9836	28.0748	34.4448	34.3012
pgaptmp_003928	pgaptmp_003928	nadE	protein_coding	protein_coding	pgaptmp_003928	0.4741	831	GO:0009435	GO:0003952,GO:0004359,GO:0008795		TRUE	-1.72289	1.48818e-06	2.09821e-05	Chromosome_II	699780	700610	831	-	11.8416	3108.36	3972.85	4182.17	5739.85	5578.58	5928.54	6772.7	5730.82	5751.12	2546.72	2846.36	2686.26	1975.18	2456.29	2569.04	1857.35	1801.53	1838.95	7098.57	5819.16	5308.69	154.13	197.58	210.059	372.104	347.11	349.204	388.055	299.677
pgaptmp_000933	pgaptmp_000933	pgaptmp_000933	protein_coding	protein_coding	pgaptmp_000933	0.4253	576				TRUE	-1.61566	1.50522e-06	2.11357e-05	Chromosome_I	979367	979942	576	-	9.68568	1237.33	1250.65	1291.41	1246.62	804.255	1054.75	1323.8	993.322	1206.24	540.825	540.608	691.016	593.584	594.926	521.712	446.64	423.419	347.946	1371.32	1185.11	1235.37	88.516	89.7333	93.5799	116.594	72.1964	89.6314	109.429	74.9385
pgaptmp_002393	pgaptmp_002393	pgaptmp_002393	protein_coding	protein_coding	pgaptmp_002393	0.4943	1224	GO:0006633	GO:0004315		TRUE	2.16407	1.50711e-06	2.11357e-05	Chromosome_I	2604593	2605816	1224	+	11.2771	1965.08	1627.34	1492.35	903.899	1200.92	774.364	843.431	1261.99	1182.32	4116.73	3483.11	3775.58	13297.5	12456.8	13662	4599.55	5448.52	6677.13	1066.77	1149.43	1517.01	66.1542	54.9462	50.8897	39.7835	50.7314	30.9668	32.8096	44.8035
pgaptmp_001533	pgaptmp_001533	pgaptmp_001533	protein_coding	protein_coding	pgaptmp_001533	0.3983	723				TRUE	-1.82734	1.52639e-06	2.13431e-05	Chromosome_I	1591112	1591834	723	-	8.32201	536.562	546.553	642.846	698.904	767.388	691.897	706.077	593.307	662.238	183.638	172.342	138.944	156.129	169.82	121.206	143.262	110.515	100.547	443.695	467.036	412.068	30.5802	31.2417	37.1116	52.0767	54.8808	46.842	46.4993	35.6598
pgaptmp_004375	pgaptmp_004375	modC	protein_coding	protein_coding	pgaptmp_004375	0.4463	1107	GO:0015689	GO:0005524,GO:0015098	GO:0016020	TRUE	-1.54302	1.53402e-06	2.13431e-05	Chromosome_II	1239928	1241034	1107	-	9.99779	1295.15	1364.18	1481.73	1787.94	1783.97	1433.27	1932.62	2261.28	2064.13	597.329	526.095	687.311	568.545	547.199	632.378	562.935	456.707	443.201	1349.53	1461	1509.53	48.2093	50.9291	55.8679	87.01	83.3267	63.3745	83.1248	88.7656
pgaptmp_005241	pgaptmp_005241	iolC	protein_coding	protein_coding	pgaptmp_005241	0.5187	987	GO:0019310	GO:0047590		TRUE	1.86793	1.53759e-06	2.13431e-05	Chromosome_II	2218826	2219812	987	-	3.92177	8.48015	2.64035	5.71782	7.6873	6.14456	9.89602	4.45474	10.4482	6.33384	18.162	41.7248	22.2311	70.6999	43.2875	43.476	48.8776	50.5972	37.0437	6.14691	5.73442	5.81547	0.354034	0.110557	0.241799	0.419586	0.321898	0.490768	0.214901	0.460003
pgaptmp_000230	pgaptmp_000230	pgaptmp_000230	protein_coding	protein_coding	pgaptmp_000230	0.5056	888	GO:0055085	GO:0022857	GO:0016020	TRUE	1.66211	1.53813e-06	2.13431e-05	Chromosome_I	248376	249263	888	-	8.35753	280.616	258.754	260.569	224.213	220.522	205.342	178.19	229.113	182.274	411.673	435.389	465	770.334	598.256	723.282	610.128	645.78	601.96	188.878	159.926	222.649	13.0214	12.0425	12.2476	13.6023	12.8405	11.3188	9.55438	11.2118
pgaptmp_002791	pgaptmp_002791	yaaA	protein_coding	protein_coding	pgaptmp_002791	0.4479	777				TRUE	-1.63417	1.5431e-06	2.13539e-05	Chromosome_I	3023623	3024399	777	-	12.022	5902.96	8186.85	8558.75	5664.9	4723.8	7050.09	9269.58	7280.88	7381.73	2062.4	2042.7	2473.21	2050.3	2121.09	2240.99	2105.11	2150.38	2025.5	7232.12	6643	5695.01	313.045	435.449	459.759	392.768	314.351	444.126	568.031	407.193
pgaptmp_002514	pgaptmp_002514	pgaptmp_002514	protein_coding	protein_coding	pgaptmp_002514	0.4043	141				TRUE	-1.72366	1.54703e-06	2.13539e-05	Chromosome_I	2735188	2735328	141	+	6.55446	185.792	244.672	209.926	276.743	168.634	257.297	314.802	179.111	204.09	42.3781	30.8401	20.3785	17.675	39.9577	46.1109	35.3941	35.9507	42.3356	147.526	152.918	138.741	54.2959	71.7146	62.1423	105.736	61.8401	89.3198	106.304	55.2003
pgaptmp_000241	pgaptmp_000241	pgaptmp_000241	protein_coding	protein_coding		0.5	1000				TRUE	2.23117	1.57769e-06	2.16456e-05	pgaptmp_000241	1	1000	1000	+	11.6849	990.636	1135.35	1190.94	1240.86	1918.47	2576.26	1021.62	936.604	855.772	11793.2	16296.3	14100.1	9691.77	5810.52	7072.09	12303.7	9917.06	8379.81	2625.85	1924.85	1944.86	40.8199	46.9215	49.7085	66.8477	99.1971	126.102	48.6433	40.6999
pgaptmp_004235	pgaptmp_004235	cyoB	protein_coding	protein_coding	pgaptmp_004235	0.4885	2037	GO:0015990	GO:0009486	GO:0016020	TRUE	2.22994	1.58074e-06	2.16456e-05	Chromosome_II	1086286	1088322	2037	+	13.9451	9416.05	6615.84	7789.3	5621.34	8940.34	5790.82	9365.36	14923	14562.9	46119.5	52518.8	42303.9	36120.3	31596.6	30567.6	29999.1	32194.5	39324.5	6130.15	6706.08	8901.82	190.474	134.226	159.606	148.666	226.938	139.15	218.91	318.348
pgaptmp_004144	pgaptmp_004144	tssH	protein_coding	protein_coding	pgaptmp_004144	0.4677	2679	GO:0033103	GO:0016887	GO:0033104	TRUE	-1.97948	1.58091e-06	2.16456e-05	Chromosome_II	977199	979877	2679	-	7.68764	246.695	286.918	321.015	454.832	404.859	440.373	539.766	434.345	458.851	70.6301	76.1931	94.4821	57.4436	115.433	89.5869	124.722	86.5479	79.3793	415.755	407.144	397.944	3.79443	4.42616	5.00142	9.14624	7.81402	8.04601	9.59325	7.04531
pgaptmp_004256	pgaptmp_004256	pgaptmp_004256	protein_coding	protein_coding	pgaptmp_004256	0.4362	894	GO:0006355	GO:0003677,GO:0003700		TRUE	-1.6989	1.58672e-06	2.16456e-05	Chromosome_II	1105067	1105960	894	-	7.9689	326.1	363.488	318.564	520.815	544.135	418.107	557.585	511.214	487.002	145.296	90.7061	138.944	145.818	156.501	133.063	124.722	90.5424	108.485	349.815	380.383	381.329	15.0304	16.8033	14.8731	31.3841	31.4712	22.8919	29.6966	24.8486
pgaptmp_004724	pgaptmp_004724	pgaptmp_004724	protein_coding	protein_coding	pgaptmp_004724	0.4265	1395				TRUE	-1.89956	1.58875e-06	2.16456e-05	Chromosome_II	1641624	1643018	1395	-	8.12917	142.621	84.4912	110.272	622.672	635.621	372.75	527.887	653.757	601.011	209.872	232.208	294.562	151.71	176.48	230.554	144.947	133.151	168.02	538.134	501.443	708.657	4.21276	2.5031	3.29938	24.0463	23.5596	13.0791	18.0177	20.3648
pgaptmp_000395	pgaptmp_000395	pgaptmp_000395	protein_coding	protein_coding	pgaptmp_000395	0.4509	570	GO:0009117	GO:0000166,GO:0047429		TRUE	1.5332	1.59844e-06	2.16561e-05	Chromosome_I	427523	428092	570	+	11.2033	1738.43	1761.11	1663.07	1506.71	1565.5	1825.82	1532.43	1417.97	1426.52	3131.94	2766.54	3521.78	4196.33	2965.75	3538.68	5523.17	4496.5	5315.77	1634.52	1847.12	1810.27	125.673	127.689	121.78	142.403	142.011	156.789	128.009	108.101
pgaptmp_001255	pgaptmp_001255	pgaptmp_001255	protein_coding	protein_coding	pgaptmp_001255	0.4512	789	GO:0006355			TRUE	-1.60662	1.60113e-06	2.16561e-05	Chromosome_I	1340923	1341711	789	-	9.54634	1241.96	1343.06	1551.98	1123.63	937.387	1196.59	1716.56	1375.43	1345.59	377.367	379.151	407.57	369.701	433.985	478.236	320.233	368.827	334.716	1160.09	1073.61	944.599	64.8616	70.3493	82.1012	76.7202	61.4308	74.234	103.589	75.7527
pgaptmp_003487	pgaptmp_003487	pgaptmp_003487	protein_coding	protein_coding	pgaptmp_003487	0.4577	2034			GO:0009279,GO:0016020	TRUE	-1.77363	1.60686e-06	2.16561e-05	Chromosome_II	233378	235411	2034	+	7.71375	229.735	252.594	263.836	368.35	367.991	284.511	351.925	310.46	380.734	157.404	121.546	144.502	120.779	144.292	125.158	91.0135	110.515	83.3483	309.581	371.463	362.221	4.65409	5.13231	5.41408	9.75605	9.35471	6.84669	8.23819	6.63273
pgaptmp_003150	pgaptmp_003150	ubiE	protein_coding	protein_coding	pgaptmp_003150	0.4833	780		GO:0008168		TRUE	1.80431	1.60711e-06	2.16561e-05	Chromosome_I	3412755	3413534	780	-	11.7138	2856.27	2410.64	2387.6	1476.6	1633.09	1264.22	1332.71	1626.18	1685.5	5852.21	5955.76	5991.28	9784.57	10597.7	11301.1	5990.04	7154.18	7600.57	1799.37	1821.63	2329.51	150.891	127.726	127.764	101.984	108.258	79.3341	81.3531	90.5967
pgaptmp_004152	pgaptmp_004152	tssA	protein_coding	protein_coding	pgaptmp_004152	0.4569	1578				TRUE	-2.19143	1.61011e-06	2.16561e-05	Chromosome_II	989039	990616	1578	+	7.4582	110.242	99.4532	96.386	181.933	187.751	183.901	227.192	258.219	270.244	135.206	156.014	124.124	103.104	134.302	100.126	133.149	139.808	88.6403	505.723	558.787	687.887	2.87871	2.60467	2.54946	6.2111	6.15203	5.7044	6.85518	7.1108
pgaptmp_003369	pgaptmp_003369	pgaptmp_003369	protein_coding	protein_coding	pgaptmp_003369	0.4917	1023	GO:0007165	GO:0000155,GO:0004673,GO:0005524		TRUE	3.13586	1.62015e-06	2.17356e-05	Chromosome_II	105026	106048	1023	-	7.67988	127.202	103.854	105.371	80.7167	121.526	111.33	190.812	247.771	173.829	189.692	214.066	144.502	810.103	664.852	657.409	554.508	593.852	985.627	50.2929	86.6534	83.9089	5.12363	4.19554	4.29919	4.25062	6.14238	5.32685	8.881	10.5248
pgaptmp_003639	pgaptmp_003639	pgaptmp_003639	protein_coding	protein_coding	pgaptmp_003639	0.4884	1245	GO:0022904,GO:0055085	GO:0010181,GO:0016655	GO:0016020	TRUE	2.76888	1.64885e-06	2.20644e-05	Chromosome_II	394358	395602	1245	+	6.71073	25.4405	37.845	44.1089	55.7329	51.8874	78.3435	74.9882	50.7483	58.412	104.936	186.855	144.502	462.495	202.008	299.062	313.491	579.205	398.22	65.3808	56.707	44.0314	0.842003	1.25626	1.47876	2.41161	2.15495	3.08011	2.86785	1.77129
pgaptmp_000239	pgaptmp_000239	pgaptmp_000239	protein_coding	protein_coding		0.5	1000				TRUE	2.50718	1.65999e-06	2.21097e-05	pgaptmp_000239	1	1000	1000	+	11.9105	1164.09	1209.28	1281.61	1438.17	1895.26	3195.59	991.181	1032.13	838.178	14773.8	19055.5	18866.8	11743.5	7485.41	8799.27	16840.9	13556.1	11278.5	3104.75	2153.59	2044.55	47.9674	49.9768	53.4929	77.4771	97.9968	156.417	47.1939	44.851
pgaptmp_001965	pgaptmp_001965	pgaptmp_001965	protein_coding	protein_coding	pgaptmp_001965	0.4535	516				TRUE	-2.62226	1.66064e-06	2.21097e-05	Chromosome_I	2125083	2125598	516	-	7.72369	252.863	366.129	417.401	652.14	611.726	347.185	369.744	336.58	303.32	94.8462	78.0072	79.6614	86.9019	139.852	115.936	79.2155	74.5643	58.2115	572.78	532.664	332.313	20.1926	29.3242	33.7633	68.0856	61.2986	32.934	34.118	28.345
pgaptmp_003974	pgaptmp_003974	pgaptmp_003974	protein_coding	protein_coding	pgaptmp_003974	0.4717	1323	GO:0016310	GO:0005524,GO:0016301		TRUE	-1.8655	1.71586e-06	2.27584e-05	Chromosome_II	741263	742585	1323	-	9.18962	949.777	883.637	753.118	1150.53	1199.56	542.632	1005.29	1375.43	1386.41	211.89	255.791	205.638	399.16	491.702	462.426	252.815	237.008	265.921	756.629	926.427	1156.45	29.5815	27.603	23.7599	46.8493	46.8818	20.0761	36.1795	45.1768
pgaptmp_000876	pgaptmp_000876	pgaptmp_000876	protein_coding	protein_coding	pgaptmp_000876	0.4435	354				TRUE	-3.09412	1.71802e-06	2.27584e-05	Chromosome_I	921531	921884	354	-	8.62984	883.477	1052.62	1068.41	1106.97	1168.83	541.807	919.162	844.063	1026.79	96.8642	139.687	133.387	122.252	162.051	134.38	89.3281	149.129	95.2552	715.277	1348.22	1006.91	102.837	122.888	125.973	168.46	170.723	74.916	123.629	103.612
pgaptmp_002032	pgaptmp_002032	hisIE	protein_coding	protein_coding	pgaptmp_002032	0.4906	636	GO:0000105	GO:0004635,GO:0004636		TRUE	1.65712	1.72705e-06	2.28205e-05	Chromosome_I	2197961	2198596	636	-	8.08664	269.823	204.187	220.544	165.918	146.787	136.895	147.007	199.262	201.979	401.583	399.107	420.538	514.047	603.805	526.982	483.72	495.32	531.842	130.762	152.281	180.28	17.4816	13.2682	14.4737	14.054	11.9337	10.5357	11.0056	13.6146
pgaptmp_003251	pgaptmp_003251	atpF	protein_coding	protein_coding	pgaptmp_003251	0.4671	471	GO:0015986	GO:0015078		TRUE	2.44795	1.76049e-06	2.3204e-05	Chromosome_I	3520649	3521119	471	-	15.2039	38671	25813.8	23155.5	12473.9	16949.4	8844.57	12632.9	27158.5	21248.6	111293	131533	133746	74832.9	73929.5	79968.1	97789	88557.1	103913	15608.7	14439.9	23430.5	3383.16	2265.03	2051.99	1426.75	1860.71	919.155	1277.07	2505.66
pgaptmp_002273	pgaptmp_002273	pgaptmp_002273	protein_coding	protein_coding	pgaptmp_002273	0.4756	1272				TRUE	1.62727	1.77566e-06	2.33455e-05	Chromosome_I	2467139	2468410	1272	+	6.77977	122.577	124.096	103.738	58.2954	79.8793	38.7594	51.972	88.8094	70.376	131.17	179.598	175.996	225.356	174.26	204.205	193.825	211.709	209.032	53.087	59.8928	68.9549	3.97081	4.03194	3.404	2.46894	3.24707	1.4915	1.94543	3.03396
pgaptmp_003304	pgaptmp_003304	agaR	protein_coding	protein_coding	pgaptmp_003304	0.4488	771				TRUE	-1.7474	1.79951e-06	2.35444e-05	Chromosome_II	40313	41083	771	-	8.41876	320.704	470.863	501.534	736.7	718.231	692.722	896.888	851.526	866.328	165.476	154.2	151.912	163.493	172.04	181.809	136.52	158.449	145.529	545.958	561.973	436.991	17.1399	25.2395	27.1511	51.4755	48.1675	43.9782	55.3881	47.9933
pgaptmp_000686	pgaptmp_000686	pgaptmp_000686	protein_coding	protein_coding	pgaptmp_000686	0.4921	1014				TRUE	-1.5073	1.79974e-06	2.35444e-05	Chromosome_I	711116	712129	1014	-	9.49037	2054.51	2117.56	2106.61	2060.84	2353.37	1175.98	1315.63	1738.13	1622.17	173.548	186.855	222.311	206.208	180.92	181.809	392.706	390.131	420.711	1009.21	1175.56	1300.17	83.4888	86.3057	86.7134	109.489	120.004	56.7667	61.7775	74.4871
pgaptmp_004236	pgaptmp_004236	cyoC	protein_coding	protein_coding	pgaptmp_004236	0.4633	600	GO:0019646	GO:0009486		TRUE	1.6097	1.82793e-06	2.38317e-05	Chromosome_II	1088312	1088911	600	+	13.5248	6454.94	6591.2	7531.18	6350.35	7849.34	9338.55	14029.5	15058.1	13711.3	21990.2	24351	20789.8	15867.7	13714.4	13376.1	21116.8	18237.6	20675.7	6327.41	6828.42	6533.27	443.301	453.999	523.905	570.178	676.435	761.835	1113.33	1090.57
pgaptmp_005034	pgaptmp_005034	pgaptmp_005034	protein_coding	protein_coding	pgaptmp_005034	0.4409	744	GO:0006355	GO:0003700		TRUE	-1.55636	1.83077e-06	2.38317e-05	Chromosome_II	1993211	1993954	744	+	9.86153	706.936	896.839	966.311	1402.93	1366.82	1550.38	1839.07	1573.94	1542.64	671.995	769.188	703.985	586.22	658.192	573.092	519.114	487.331	440.555	1608.81	1395.37	1305.99	39.153	49.8176	54.2107	101.585	94.9913	101.999	117.695	91.9292
pgaptmp_001095	pgaptmp_001095	pgaptmp_001095	protein_coding	protein_coding	pgaptmp_001095	0.4367	948				TRUE	-1.64616	1.84109e-06	2.39069e-05	Chromosome_I	1164495	1165442	948	+	12.1763	6966.83	8769.48	9195.88	6338.82	6497.54	7093.8	8084.62	7065.95	7206.5	2885.75	2918.92	2738.13	2981.18	3027.91	2952.41	1997.24	2087.8	2062.54	7261.74	6500.28	5556.27	302.82	382.303	404.88	360.217	354.392	366.272	406.054	323.891
pgaptmp_000935	pgaptmp_000935	fadJ	protein_coding	protein_coding	pgaptmp_000935	0.4662	2115	GO:0006635	GO:0003857,GO:0008692,GO:0016491,GO:0051287		TRUE	1.61725	1.86528e-06	2.41613e-05	Chromosome_I	981881	983995	2115	+	8.50045	340.748	323.003	302.227	187.058	223.935	202.044	198.979	258.965	225.203	659.887	888.92	800.319	745.294	645.983	602.076	588.217	528.608	615.19	180.496	157.378	211.018	6.63867	6.31157	5.96437	4.76463	5.47465	4.67593	4.47949	5.3207
pgaptmp_001158	pgaptmp_001158	pgaptmp_001158	protein_coding	protein_coding	pgaptmp_001158	0.4439	669				TRUE	-2.49616	1.86995e-06	2.41623e-05	Chromosome_I	1230056	1230724	669	+	6.44924	471.805	426.857	477.029	271.618	221.204	150.914	511.553	461.212	522.19	14.126	18.1412	33.3466	16.2021	22.1987	18.4444	8.42718	18.6411	17.1989	111.203	115.325	156.187	29.0599	26.3692	29.7618	21.8724	17.0967	11.0417	36.408	29.9579
pgaptmp_002691	pgaptmp_002691	hscB	protein_coding	protein_coding	pgaptmp_002691	0.4477	516	GO:0097428	GO:0051087		TRUE	2.03795	1.88986e-06	2.42419e-05	Chromosome_I	2915387	2915902	516	-	10.9851	1541.07	1064.06	1051.26	705.31	958.552	545.931	667.469	947.052	1030.3	4536.47	4537.12	4283.19	7283.56	8607.56	7495	4926.53	4766.79	4635.75	1028.77	930.887	1529.47	123.064	85.2233	85.0358	73.6367	96.0528	51.787	61.5906	79.7557
pgaptmp_004074	pgaptmp_004074	pgaptmp_004074	protein_coding	protein_coding	pgaptmp_004074	0.4492	699				TRUE	-1.84305	1.88991e-06	2.42419e-05	Chromosome_II	862865	863563	699	+	11.8991	4285.56	5526.25	5969.4	6696.28	4994.17	8320.08	10015.7	7282.37	7523.19	1789.97	1926.6	1915.58	1562.76	1457.35	1621.79	1971.96	2267.55	1845.57	8324.04	7443.27	6148.61	252.632	326.735	356.447	516.084	369.428	582.617	682.243	452.724
pgaptmp_000240	pgaptmp_000240	pgaptmp_000240	protein_coding	protein_coding		0.5	1000				TRUE	2.57124	1.88994e-06	2.42419e-05	pgaptmp_000240	1	1000	1000	+	11.2082	670.703	691.772	865.024	783.464	1234.37	1750.77	619.952	701.52	576.379	8719.79	10986.3	11267.5	7853.58	4582.93	5806.02	10282.8	8613.51	7240.72	1948.01	1248.83	1173.89	27.6368	28.5894	36.1051	42.2069	63.825	85.6963	29.5183	30.4844
pgaptmp_005071	pgaptmp_005071	pgaptmp_005071	protein_coding	protein_coding	pgaptmp_005071	0.4856	348				TRUE	1.63764	1.89772e-06	2.42826e-05	Chromosome_II	2033998	2034345	348	-	6.65592	47.7972	56.3275	61.2623	82.6385	92.1685	70.9215	96.5194	70.152	80.2286	119.062	134.245	98.1873	175.277	118.763	127.793	224.163	247.66	243.43	71.5277	77.7332	62.3086	5.65954	6.68933	7.34776	12.7929	13.6945	9.97543	13.2059	8.75988
pgaptmp_001826	pgaptmp_001826	pgaptmp_001826	protein_coding	protein_coding	pgaptmp_001826	0.4092	567				TRUE	-1.92993	1.91508e-06	2.44452e-05	Chromosome_I	1957928	1958494	567	-	10.0313	1511.78	1994.34	1904.03	1928.23	1627.63	1815.1	2138.28	1776.19	1834	682.085	629.5	576.156	555.288	607.135	545.426	485.405	387.468	343.977	1844.63	1464.82	1398.21	109.866	145.365	140.163	183.206	148.428	156.693	179.562	136.127
pgaptmp_002797	pgaptmp_002797	grcA	protein_coding	protein_coding	pgaptmp_002797	0.4524	378		GO:0003824		TRUE	-3.16425	1.94548e-06	2.4745e-05	Chromosome_I	3030079	3030456	378	+	13.4271	24331.9	34163.5	32968.1	24882.5	18536.1	31537	46914.4	29677.3	30543.9	4373.01	3223.69	4197.97	2732.25	2909.14	3269.92	2983.22	3624.36	1770.16	30441.7	24397.4	20451.3	2652.42	3735.19	3640.35	3546.23	2535.54	4083.77	5909.45	3411.69
pgaptmp_003154	pgaptmp_003154	pgaptmp_003154	protein_coding	protein_coding	pgaptmp_003154	0.4308	441				TRUE	1.48194	1.95037e-06	2.4745e-05	Chromosome_I	3419007	3419447	441	+	8.01585	262.114	174.263	240.965	172.324	213.012	123.7	104.686	106.721	117.528	326.917	366.453	402.012	462.495	499.471	490.093	613.499	517.956	529.196	175.466	199.43	203.541	24.4912	16.3308	22.8064	21.0509	24.9752	13.7298	11.3028	10.5159
pgaptmp_002375	pgaptmp_002375	pgaptmp_002375	protein_coding	protein_coding	pgaptmp_002375	0.427	1068		GO:0008171		TRUE	-1.4121	1.96128e-06	2.4745e-05	Chromosome_I	2589006	2590073	1068	-	11.565	4778.95	5139.88	4771.11	3681.58	3969.39	3620.3	4274.33	4374.05	4388.64	2502.32	2644.99	2525.08	1892.69	2220.98	2003.85	1324.75	1577.83	1451.32	3911.67	3721.64	4036.77	184.382	198.895	186.461	185.706	192.175	165.923	190.559	177.971
pgaptmp_003158	pgaptmp_003158	uspA	protein_coding	protein_coding	pgaptmp_003158	0.4624	426				TRUE	-2.15991	1.96172e-06	2.4745e-05	Chromosome_I	3422151	3422576	426	+	11.0831	7052.4	9130.33	10861.4	4912.83	4208.34	6519.01	12060.5	9277.97	8502.12	290.593	370.081	257.51	512.574	405.127	450.569	775.3	814.882	1139.09	4659.92	4189.31	3465.19	682.159	885.765	1064.18	621.278	510.794	749.039	1347.99	946.414
pgaptmp_000500	pgaptmp_000500	pgaptmp_000500	protein_coding	protein_coding	pgaptmp_000500	0.526	192				TRUE	2.65923	1.96788e-06	2.4745e-05	Chromosome_I	516558	516749	192	+	7.44347	481.827	234.991	374.109	35.8741	34.8192	25.5647	26.7285	35.8223	45.7444	768.859	983.254	872.57	637.772	542.759	635.013	375.852	366.164	467.015	64.2632	34.4065	71.4472	103.407	50.5815	81.3275	10.0657	9.37695	6.51737	6.62835	8.10755
pgaptmp_005269	pgaptmp_005269	pgaptmp_005269	protein_coding	protein_coding	pgaptmp_005269	0.434	318				TRUE	-1.73703	1.97014e-06	2.4745e-05	Chromosome_II	2253877	2254194	318	+	7.07742	205.065	191.865	165	262.009	209.598	213.589	245.753	217.173	235.759	44.3961	87.0778	90.777	53.0249	53.2769	61.9203	80.9009	78.5588	63.5035	297.846	263.146	244.25	26.572	24.9351	21.657	44.3867	34.0803	32.8764	36.7964	29.6767
pgaptmp_000895	pgaptmp_000895	fliH	protein_coding	protein_coding	pgaptmp_000895	0.4794	801	GO:0071973	GO:0003774	GO:0009288	TRUE	2.39167	1.97151e-06	2.4745e-05	Chromosome_I	943163	943963	801	+	9.59263	706.936	473.503	507.252	321.585	365.26	296.881	288.073	359.716	377.215	1531.66	1676.25	1730.32	1783.7	1933.51	2005.16	2044.43	2094.46	2313.91	297.846	358.082	561.608	36.3669	24.4305	26.4321	21.6286	23.5784	18.1419	17.1239	19.5148
pgaptmp_002605	pgaptmp_002605	ribBA	protein_coding	protein_coding	pgaptmp_002605	0.491	1110		GO:0003935,GO:0008686		TRUE	2.08534	1.98594e-06	2.48668e-05	Chromosome_I	2813301	2814410	1110	-	11.8764	3308.03	2701.96	2530.54	1919.9	2282.36	1394.51	2257.81	3330.73	2952.27	4276.15	4252.3	4494.39	7896.29	8250.16	8484.4	9770.47	8729.35	9764.98	1726.16	2083.5	2865.37	122.802	100.6	95.155	93.1796	106.318	61.494	96.8496	130.393
pgaptmp_002771	pgaptmp_002771	pgaptmp_002771	protein_coding	protein_coding	pgaptmp_002771	0.4683	852				TRUE	1.80211	1.99287e-06	2.48943e-05	Chromosome_I	3001146	3001997	852	-	12.9677	4280.16	3382.29	4219.75	3383.69	3551.56	2720.58	2585.98	2979.97	3141.58	27471.1	23099.2	24144.8	37653.6	42023.3	43241.5	12148.6	15930.1	14417.9	3603.21	4213.52	4397.33	207.004	164.064	206.723	213.952	215.538	156.299	144.517	151.988
pgaptmp_003804	pgaptmp_003804	pgaptmp_003804	protein_coding	protein_coding	pgaptmp_003804	0.4483	861		GO:0005515		TRUE	-1.67051	2.0068e-06	2.49902e-05	Chromosome_II	558808	559668	861	-	9.5721	678.412	984.851	989.182	1285.06	1084.17	1331.84	1550.25	1395.58	1431.45	518.627	531.538	598.387	463.968	473.943	442.664	357.312	324.887	338.685	1274.65	1092.09	942.106	32.4675	47.2725	47.9528	80.4053	65.1088	75.7149	85.7298	70.4349
pgaptmp_000113	pgaptmp_000113	sthA	protein_coding	protein_coding	pgaptmp_000113	0.4738	1431	GO:0045454	GO:0003957,GO:0050660		TRUE	1.42304	2.01005e-06	2.49902e-05	Chromosome_I	118548	119978	1431	-	9.19663	491.078	499.906	518.688	366.428	426.023	390.893	413.549	458.227	403.958	694.193	692.994	583.566	786.536	844.662	864.25	1087.11	1186.37	1280.65	458.224	428.17	425.36	14.1406	14.4375	15.1289	13.7947	15.3935	13.3706	13.76	13.9148
pgaptmp_002864	pgaptmp_002864	pgaptmp_002864	protein_coding	protein_coding	pgaptmp_002864	0.4369	444				TRUE	1.58582	2.02177e-06	2.50766e-05	Chromosome_I	3113311	3113754	444	-	11.6298	3264.09	2745.96	2617.13	2238.29	2483.77	1326.89	1940.78	2238.15	2342.82	3170.28	3191.04	2997.49	5351.1	6284.46	6516.13	6836.13	5766.75	6990.67	2018.98	2032.53	2481.54	302.926	255.596	246.027	271.579	289.249	146.28	208.126	219.05
pgaptmp_001886	pgaptmp_001886	pgaptmp_001886	protein_coding	protein_coding	pgaptmp_001886	0.4491	216				TRUE	-1.68484	2.03252e-06	2.51506e-05	Chromosome_I	2026397	2026612	216	-	9.46478	1950.43	2418.56	2722.5	1339.51	889.596	1037.43	1742.55	1489.61	1499.01	276.466	293.888	294.562	191.479	221.987	260.856	364.054	346.192	263.275	985.182	1038.57	1172.23	372.08	462.748	526.083	334.085	212.953	235.093	384.117	299.679
pgaptmp_000036	pgaptmp_000036	thiH	protein_coding	protein_coding	pgaptmp_000036	0.4636	1113	GO:0009228	GO:0005506,GO:0016829,GO:0051539,GO:1904047		TRUE	1.50355	2.05549e-06	2.53525e-05	Chromosome_I	38691	39803	1113	+	7.85202	188.876	204.187	192.772	149.262	163.172	176.479	155.916	168.663	168.902	215.926	283.003	240.837	368.228	369.609	376.792	475.293	443.391	460.4	151.438	173.944	143.725	6.99262	7.58184	7.22919	7.22467	7.58045	7.76124	6.67004	6.58511
pgaptmp_002841	pgaptmp_002841	ftsL	protein_coding	protein_coding	pgaptmp_002841	0.4654	318	GO:0000910		GO:0016020	TRUE	1.37895	2.0626e-06	2.53525e-05	Chromosome_I	3090621	3090938	318	-	10.3263	993.719	940.845	1009.6	814.213	888.231	816.422	867.19	874.661	940.223	1800.06	2129.78	2319.44	1869.13	1690.43	1716.64	2607.37	2364.75	2127.37	901.92	869.72	947.091	128.764	122.274	132.515	137.935	144.425	125.667	129.843	119.523
pgaptmp_002110	pgaptmp_002110	pgaptmp_002110	protein_coding	protein_coding	pgaptmp_002110	0.5009	3162		GO:0015562		TRUE	2.51483	2.0633e-06	2.53525e-05	Chromosome_I	2290727	2293888	3162	-	12.9934	6836.54	5304.46	5918.76	2869.93	3563.16	3945.21	4479.99	5762.91	5391.5	15423.6	19993.4	17210.6	25366.5	16604.6	17588	15015.5	17698.4	26507.4	3535.59	3105.5	3748.49	89.0908	69.33	78.1285	48.896	58.2664	61.0719	67.4602	79.1986
pgaptmp_000462	pgaptmp_000462	pgaptmp_000462	protein_coding	protein_coding	pgaptmp_000462	0.453	1437				TRUE	-1.98881	2.06909e-06	2.53645e-05	Chromosome_I	494560	495996	1437	+	11.3085	6810.33	6555.11	6893.24	3713.61	4546.3	3068.59	5718.41	6671.9	6082.59	809.219	1070.33	1035.6	1023.68	925.687	938.027	967.44	1138.44	1170.85	3318.21	4990.22	4831.82	195.285	188.523	200.22	139.221	163.585	104.524	189.475	201.758
pgaptmp_002987	pgaptmp_002987	rplN	protein_coding	protein_coding	pgaptmp_002987	0.4812	372	GO:0006412	GO:0003735	GO:0015934	TRUE	2.43414	2.09392e-06	2.56091e-05	Chromosome_I	3239976	3240347	372	-	16.6255	89134.1	69311	56433.2	32173.3	48028	36465.2	35038	68759.4	55107.9	256266	342934	369831	276031	207110	222772	258246	230489	233124	39122.3	36948.1	58160.5	9873.23	7700.18	6331.88	4659.26	6675.67	4798.09	4484.66	8032.05
pgaptmp_002094	pgaptmp_002094	pgaptmp_002094	protein_coding	protein_coding	pgaptmp_002094	0.4749	777		GO:0016491,GO:0070403		TRUE	-1.64772	2.10334e-06	2.56646e-05	Chromosome_I	2270531	2271307	777	-	8.95787	1450.88	1521.72	1637.75	802.683	646.545	763.643	1691.32	1513.49	1502.53	137.224	186.855	233.426	144.346	179.81	169.952	187.083	213.041	226.231	583.398	746.748	698.687	76.9427	80.9386	87.9764	55.6528	43.0251	48.1063	103.642	84.6441
pgaptmp_001203	pgaptmp_001203	pgaptmp_001203	protein_coding	protein_coding	pgaptmp_001203	0.4758	2892				TRUE	1.98566	2.1239e-06	2.58076e-05	Chromosome_I	1280068	1282959	2892	+	11.6743	3593.27	2361.35	2619.58	1345.92	1667.91	1228.76	1394.33	2170.98	2197.84	6895.52	8448.36	8225.5	4844.41	5083.51	5346.23	6571.51	7098.26	8428.76	1600.99	1655.33	2336.16	51.1976	33.7446	37.8071	25.0718	29.8207	20.797	22.9563	32.6208
pgaptmp_001611	pgaptmp_001611	pgaptmp_001611	protein_coding	protein_coding	pgaptmp_001611	0.4654	939	GO:0006355	GO:0003700,GO:0043565		TRUE	-1.53765	2.12487e-06	2.58076e-05	Chromosome_I	1682993	1683931	939	-	7.49896	327.642	336.205	334.084	212.041	265.582	188.849	227.934	212.695	238.574	121.08	163.271	114.861	113.414	140.962	111.984	77.53	90.5424	89.9633	249.229	270.792	284.958	14.3778	14.7972	14.8501	12.1652	14.6243	9.84424	11.5578	9.84303
pgaptmp_004159	pgaptmp_004159	tssM	protein_coding	protein_coding	pgaptmp_004159	0.4369	3390	GO:0033103	GO:0003674		TRUE	-1.57811	2.1373e-06	2.5824e-05	Chromosome_II	996442	999831	3390	-	8.09014	250.55	320.363	271.188	495.831	449.919	440.373	545.706	521.662	527.82	203.818	232.208	150.06	117.833	138.742	101.444	148.318	171.764	129.653	477.783	457.479	464.407	3.04546	3.90556	3.33896	7.87949	6.86243	6.35849	7.66464	6.68694
pgaptmp_002871	pgaptmp_002871	pgaptmp_002871	protein_coding	protein_coding	pgaptmp_002871	0.4703	1533				TRUE	-1.6019	2.13903e-06	2.5824e-05	Chromosome_I	3122796	3124328	1533	-	13.6876	27937.5	32023.9	31992	18090.8	19478.3	14537.3	27560	30677.3	27560.6	5036.94	5643.73	5750.44	7245.26	6078.01	6547.75	6143.41	6413.86	6904.68	18104.3	20761.8	20437.2	750.936	863.325	871.044	635.74	656.98	464.166	855.993	869.586
pgaptmp_004882	pgaptmp_004882	pgaptmp_004882	protein_coding	protein_coding	pgaptmp_004882	0.4522	984		GO:0004197		TRUE	-2.62231	2.14166e-06	2.5824e-05	Chromosome_II	1815461	1816444	984	+	10.3007	2044.49	1783.12	1801.11	2157.57	2604.61	1180.93	2039.53	3286.7	3016.31	791.057	1191.88	978.168	360.864	435.095	461.109	397.763	452.712	541.103	2043.01	2736.59	3996.89	85.6145	74.8904	76.3988	118.123	136.865	58.7435	98.6888	145.145
pgaptmp_000050	pgaptmp_000050	recQ	protein_coding	protein_coding	pgaptmp_000050	0.5033	1836	GO:0006310	GO:0003678		TRUE	1.51243	2.14586e-06	2.5824e-05	Chromosome_I	54857	56692	1836	+	10.9724	1756.16	1533.16	1520.12	992.943	1295.82	1165.26	910.253	1115.72	1108.42	2782.83	3060.42	3482.87	4682.39	4188.9	4520.18	3401.21	3882.67	4093.33	1299.23	1202.95	1485.44	39.414	34.511	34.5579	29.1351	36.4935	31.0657	23.606	26.4069
pgaptmp_001605	pgaptmp_001605	pgaptmp_001605	protein_coding	protein_coding	pgaptmp_001605	0.4873	981	GO:0055085	GO:0022857	GO:0016020	TRUE	1.80859	2.15269e-06	2.5847e-05	Chromosome_I	1674913	1675893	981	-	6.33373	43.9426	65.1286	44.1089	40.3583	38.2328	26.3894	40.8352	36.5686	29.5579	516.609	522.467	490.937	268.07	198.679	164.682	109.553	125.162	112.454	31.8522	22.9377	24.9234	1.84576	2.74375	1.87671	2.2163	2.01517	1.31672	1.98197	1.61986
pgaptmp_004575	pgaptmp_004575	pgaptmp_004575	protein_coding	protein_coding	pgaptmp_004575	0.4194	651	GO:0000160,GO:0006355	GO:0000156,GO:0003677		TRUE	-1.47819	2.19328e-06	2.62744e-05	Chromosome_II	1464005	1464655	651	+	7.44139	195.043	227.95	220.544	349.132	298.353	324.095	262.83	288.071	321.618	110.99	92.5202	124.124	92.7936	109.884	75.0949	94.3844	86.5479	83.3483	250.906	276.526	257.542	12.3455	14.4711	14.1402	28.8917	23.697	24.3682	19.2232	19.229
pgaptmp_004829	pgaptmp_004829	pgaptmp_004829	protein_coding	protein_coding	pgaptmp_004829	0.4184	294				TRUE	-1.984	2.21428e-06	2.64276e-05	Chromosome_II	1756681	1756974	294	-	5.96117	58.5901	95.0526	62.896	125.559	117.429	98.9602	141.809	93.2872	116.824	28.252	32.6542	53.7251	67.754	39.9577	21.0793	18.5398	21.3041	25.1368	106.174	97.4851	137.079	8.21174	13.3616	8.92928	23.0073	20.6525	16.4758	22.9663	13.7884
pgaptmp_000481	pgaptmp_000481	glsB	protein_coding	protein_coding	pgaptmp_000481	0.4745	921	GO:0006541	GO:0004359		TRUE	1.38581	2.21632e-06	2.64276e-05	Chromosome_I	504322	505242	921	+	10.1492	794.821	873.956	867.474	637.406	736.665	964.862	601.39	694.803	605.937	1693.1	2024.56	2347.23	1894.17	1493.97	1673.17	2362.98	2093.13	1992.42	842.127	839.136	771.796	35.5605	39.2167	39.3132	37.2838	41.3575	51.2789	31.0906	32.7823
pgaptmp_002412	pgaptmp_002412	pgaptmp_002412	protein_coding	protein_coding	pgaptmp_002412	0.4964	1926		GO:0003677,GO:0004386,GO:0005524		TRUE	1.49498	2.22181e-06	2.64276e-05	Chromosome_I	2622102	2624027	1926	-	10.3473	925.107	860.754	888.712	721.325	754.416	899.713	719.441	792.568	743.874	2316.67	2675.83	2769.62	2878.07	2862.53	2854.92	2056.23	2075.82	2317.88	716.395	684.307	880.628	19.7922	18.4699	19.2595	20.1762	20.2534	22.8655	17.7857	17.8821
pgaptmp_002049	pgaptmp_002049	pgaptmp_002049	protein_coding	protein_coding	pgaptmp_002049	0.4288	513				TRUE	2.82574	2.22617e-06	2.64276e-05	Chromosome_I	2214961	2215473	513	-	7.5237	133.37	110.015	116.807	63.4202	86.0239	80.8175	82.4128	123.885	92.1925	223.998	547.865	311.235	978.015	437.315	561.235	377.538	752.301	514.643	68.1748	83.4676	57.3239	10.7127	8.86287	9.50368	6.66001	8.67053	7.71118	7.64909	10.494
pgaptmp_002326	pgaptmp_002326	pgaptmp_002326	protein_coding	protein_coding	pgaptmp_002326	0.4399	591				TRUE	-1.82214	2.23588e-06	2.64831e-05	Chromosome_I	2527357	2527947	591	+	10.6134	2147.79	2679.08	2917.72	2434.95	2221.6	2445.97	2175.4	1758.28	1712.95	1033.22	1112.06	848.487	930.881	1192.07	1140.92	738.221	746.975	715.737	3247.8	2362.58	2246.43	149.749	187.344	206.062	221.956	194.367	202.58	175.261	129.282
pgaptmp_001912	pgaptmp_001912	pgaptmp_001912	protein_coding	protein_coding	pgaptmp_001912	0.4585	735				TRUE	-1.38866	2.25492e-06	2.66021e-05	Chromosome_I	2056447	2057181	735	+	10.7915	2096.14	2824.3	2755.99	2469.55	2007.22	2409.68	2750.8	2105.31	2206.29	1245.11	1001.4	1041.16	1375.7	1747.04	1716.64	913.506	971.999	923.446	2722.52	2334.54	2356.1	117.514	158.805	156.506	181.006	141.206	160.474	178.199	124.47
pgaptmp_002941	pgaptmp_002941	pgaptmp_002941	protein_coding	protein_coding	pgaptmp_002941	0.4945	639		GO:0016831,GO:0106141		TRUE	2.02154	2.25604e-06	2.66021e-05	Chromosome_I	3200266	3200904	639	-	9.6456	755.504	520.149	535.841	360.022	493.613	366.978	378.653	535.842	522.893	988.822	1077.59	1165.28	1939.83	1401.85	1625.74	1665.21	2183.67	2429.01	419.108	519.283	596.501	48.7185	33.641	35.0006	30.3524	39.942	28.1107	28.2146	36.4396
pgaptmp_003418	pgaptmp_003418	pgaptmp_003418	protein_coding	protein_coding	pgaptmp_003418	0.449	813	GO:0006355	GO:0003700,GO:0043565		TRUE	-1.31193	2.30122e-06	2.70404e-05	Chromosome_II	164824	165636	813	+	10.1926	1032.27	1177.6	1572.4	1956.42	1360	1586.66	2406.3	2063.51	2049.35	641.725	696.623	718.805	465.441	617.125	663.997	856.201	864.147	784.533	2056.98	2189.27	2022.95	52.319	59.8615	80.726	129.639	86.4951	95.5271	140.927	110.295
pgaptmp_003237	pgaptmp_003237	ilvM	protein_coding	protein_coding	pgaptmp_003237	0.4491	285				TRUE	1.68654	2.3035e-06	2.70404e-05	Chromosome_I	3505491	3505775	285	+	7.75823	203.524	95.9327	157.648	83.9197	71.0039	74.2202	89.8373	139.558	113.305	518.627	404.549	348.287	895.532	1501.74	1201.52	293.266	383.474	361.176	108.409	90.4763	106.34	29.4258	13.9112	23.088	15.8629	12.8819	12.7471	15.0088	21.2788
pgaptmp_002211	pgaptmp_002211	ybgE	protein_coding	protein_coding	pgaptmp_002211	0.4488	303				TRUE	1.61567	2.32017e-06	2.71754e-05	Chromosome_I	2393667	2393969	303	-	12.9812	6434.89	6265.55	7025.56	3952.55	3899.75	4624.74	6346.53	6978.63	5820.79	14796	14728.9	15839.7	11180.9	10094.9	11328.8	17405.5	15019.4	14497.3	5419.9	5153.33	4732.13	875.098	854.591	967.786	702.748	665.485	747.098	997.301	1000.84
pgaptmp_002977	pgaptmp_002977	secY	protein_coding	protein_coding	pgaptmp_002977	0.4472	1335	GO:0015031,GO:0043952		GO:0016020	TRUE	2.50511	2.34115e-06	2.73602e-05	Chromosome_I	3234931	3236265	1335	-	17.8711	229572	172102	143649	80418.8	113482	73700.6	92640.1	173293	144666	661584	672504	776958	682971	544109	593134	562214	542884	536030	82081.9	82538.6	125993	7085.92	5327.79	4491.19	3245.19	4395.31	2702.23	3304.08	5640.77
pgaptmp_002610	pgaptmp_002610	proB	protein_coding	protein_coding	pgaptmp_002610	0.4754	1140	GO:0006561	GO:0004349	GO:0005737	TRUE	2.15167	2.35375e-06	2.74465e-05	Chromosome_I	2818205	2819344	1140	-	11.7102	2341.29	1949.46	1943.24	1731.56	1991.52	1486.05	1378.74	1869.48	1893.11	5626.19	4560.7	5741.18	13182.6	11274.7	11616	6456.9	7873.19	8156.23	1251.73	1735.62	2081.11	84.627	70.6726	71.148	81.8273	90.3284	63.8061	57.5853	71.2611
pgaptmp_004643	pgaptmp_004643	pgaptmp_004643	protein_coding	protein_coding	pgaptmp_004643	0.3338	2037				TRUE	-2.01973	2.3978e-06	2.78983e-05	Chromosome_II	1552797	1554833	2037	-	11.1995	4896.9	7077.02	6888.33	7411.2	7770.83	8598.82	8229.4	7182.37	8046.79	445.979	511.582	372.371	606.84	507.241	376.792	1289.36	1014.61	990.919	5469.08	4300.81	3660.42	99.0578	143.582	141.145	196.003	197.251	206.624	192.358	153.22
pgaptmp_004054	pgaptmp_004054	pgaptmp_004054	protein_coding	protein_coding	pgaptmp_004054	0.4553	369				TRUE	-1.96183	2.41062e-06	2.79856e-05	Chromosome_II	823044	823412	369	-	8.27576	568.941	665.368	795.593	448.426	324.296	565.723	743.942	555.246	596.084	139.242	90.7061	170.438	117.833	152.061	139.65	141.577	142.471	148.175	705.218	600.202	456.099	63.533	74.5208	89.9924	65.4679	45.4422	75.043	95.9943	65.3877
pgaptmp_004549	pgaptmp_004549	pgaptmp_004549	protein_coding	protein_coding	pgaptmp_004549	0.4494	336				TRUE	-1.40486	2.43376e-06	2.81835e-05	Chromosome_II	1433627	1433962	336	+	8.77654	475.659	467.342	556.262	781.542	673.854	641.592	684.546	714.953	700.241	294.629	235.836	248.247	223.883	273.044	292.475	278.097	259.644	251.368	777.305	676.024	682.902	58.3331	57.4827	69.1005	125.308	103.698	93.4658	97.0054	92.4647
pgaptmp_003743	pgaptmp_003743	pgaptmp_003743	protein_coding	protein_coding	pgaptmp_003743	0.4484	765				TRUE	-1.62652	2.43839e-06	2.81835e-05	Chromosome_II	500069	500833	765	-	8.45905	346.144	405.734	406.782	746.309	616.505	769.416	689	641.816	651.681	135.206	181.412	194.522	97.2123	154.281	193.666	193.825	207.715	254.014	753.835	646.078	688.718	18.6446	21.919	22.1943	52.5559	41.6696	49.2303	42.8836	36.4575
pgaptmp_002386	pgaptmp_002386	pgaptmp_002386	protein_coding	protein_coding	pgaptmp_002386	0.4743	447				TRUE	1.40911	2.45628e-06	2.82973e-05	Chromosome_I	2598211	2598657	447	+	9.53262	743.94	630.164	650.197	349.772	464.256	445.321	440.277	495.542	494.039	1065.51	1139.27	1291.26	1246.08	1134.35	1234.45	1348.35	1199.69	1414.28	465.489	465.125	549.977	68.5786	58.2623	60.7126	42.1543	53.7024	48.7639	46.8977	48.1737
pgaptmp_005001	pgaptmp_005001	pgaptmp_005001	protein_coding	protein_coding	pgaptmp_005001	0.3961	669	GO:0006355			TRUE	-2.10508	2.459e-06	2.82973e-05	Chromosome_II	1954239	1954907	669	-	8.61602	366.188	396.933	490.915	984.615	862.97	770.24	634.801	507.483	605.937	294.629	234.022	201.932	181.168	247.516	229.237	205.623	177.09	132.299	908.067	735.917	654.656	22.5547	24.5207	30.6282	79.2875	66.6981	56.3551	45.1798	32.9634
pgaptmp_003293	pgaptmp_003293	pgaptmp_003293	protein_coding	protein_coding	pgaptmp_003293	0.4608	1992				TRUE	-1.98361	2.47617e-06	2.83834e-05	Chromosome_II	29384	31375	1992	+	8.39581	527.311	474.383	418.217	1112.1	1144.25	499.749	527.145	579.873	643.94	139.242	123.36	188.964	162.021	168.71	138.333	146.633	150.46	144.206	478.9	565.796	791.735	10.9078	9.84196	8.76302	30.0758	29.7014	12.2799	12.6001	12.6497
pgaptmp_001939	pgaptmp_001939	pgaptmp_001939	protein_coding	protein_coding	pgaptmp_001939	0.4444	855	GO:0006351,GO:0006355	GO:0003677,GO:0003700,GO:0097367		TRUE	-1.91802	2.47727e-06	2.83834e-05	Chromosome_I	2090923	2091777	855	+	13.3166	21450.2	29388.9	30738.2	19962	17595.3	18843.7	32299.9	28488.4	26308.6	2815.11	2666.76	2710.34	2767.6	3213.27	3235.67	5390.02	4310.08	5356.78	21898.1	18837.6	16263.4	1033.77	1420.56	1500.56	1257.77	1064.08	1078.78	1798.74	1447.9
pgaptmp_002634	pgaptmp_002634	nadK	protein_coding	protein_coding	pgaptmp_002634	0.4633	885		GO:0003951		TRUE	-1.46347	2.48601e-06	2.84216e-05	Chromosome_I	2850141	2851025	885	+	11.0697	3880.83	4361.86	3773.76	2842.38	2766.42	2152.39	3716	3600.89	4010.02	1111.92	1168.29	1133.79	1785.17	1480.66	1351.71	970.811	1102.49	1120.57	2613.56	3163.49	3108.78	180.692	203.69	177.98	173.023	161.629	119.045	199.924	176.809
pgaptmp_002169	pgaptmp_002169	pgaptmp_002169	protein_coding	protein_coding	pgaptmp_002169	0.4036	441				TRUE	-1.56227	2.49522e-06	2.8465e-05	Chromosome_I	2352114	2352554	441	-	8.00806	437.113	328.284	472.128	329.273	291.525	229.258	286.589	313.445	347.657	167.494	150.572	185.259	82.4832	77.6955	104.079	205.623	248.992	186.541	670.013	623.777	657.979	40.8426	30.7647	44.6851	40.2237	34.1808	25.4459	30.9423	30.8859
pgaptmp_000053	pgaptmp_000053	gppA	protein_coding	protein_coding	pgaptmp_000053	0.494	1494	GO:0015974	GO:0008894		TRUE	1.60126	2.50287e-06	2.84904e-05	Chromosome_I	58122	59615	1494	-	12.5844	4527.63	4186.72	4696.78	2276.72	2644.21	2630.69	3705.6	4388.23	4125.44	11294.8	12063.9	13021.9	18336.3	14661.1	16098	9111.46	10951.6	11622.5	3311.51	3462.95	3689.5	124.876	115.815	131.217	82.0963	91.5144	86.1891	118.098	127.637
pgaptmp_002909	pgaptmp_002909	calR	protein_coding	protein_coding	pgaptmp_002909	0.4552	960				TRUE	-1.82678	2.52051e-06	2.86292e-05	Chromosome_I	3165980	3166939	960	-	13.9848	33683.9	43427.6	44181.6	35672.9	30734.4	32642.9	50943	47376.5	43822.4	4364.94	4814.68	5020.52	6877.03	6964.85	7011.49	6814.22	6677.5	5645.19	25600.8	22750.3	19630.5	1445.8	1869.55	1920.93	2001.85	1655.38	1664.37	2526.65	2144.51
pgaptmp_001590	pgaptmp_001590	pgaptmp_001590	protein_coding	protein_coding	pgaptmp_001590	0.4615	921		GO:0001216		TRUE	-1.95275	2.57083e-06	2.91379e-05	Chromosome_I	1658329	1659249	921	-	8.63701	864.975	793.865	902.598	584.876	686.826	393.367	821.9	979.889	943.741	163.458	157.829	157.47	287.218	283.034	264.808	129.779	153.123	149.498	441.46	659.458	660.471	38.6992	35.6229	40.9049	34.2112	38.5595	20.906	42.4905	46.2333
pgaptmp_004793	pgaptmp_004793	pgaptmp_004793	protein_coding	protein_coding	pgaptmp_004793	0.4448	888	GO:0006355	GO:0003677,GO:0003700		TRUE	-1.73194	2.58252e-06	2.92075e-05	Chromosome_II	1717146	1718033	888	+	8.77275	528.082	616.082	488.465	693.138	709.356	506.347	755.079	821.674	838.881	238.124	188.669	246.395	329.933	367.389	341.221	165.173	219.698	228.877	631.455	718.713	764.319	24.5045	28.6726	22.9594	42.0505	41.3043	27.9105	40.4867	40.2091
pgaptmp_002339	pgaptmp_002339	yfbR	protein_coding	protein_coding	pgaptmp_002339	0.4496	585		GO:0002953		TRUE	-1.77406	2.61439e-06	2.95044e-05	Chromosome_I	2542737	2543321	585	+	8.51301	750.108	684.731	523.589	480.456	537.308	301.829	516.008	661.966	719.242	197.764	163.271	196.375	309.312	336.311	321.459	146.633	153.123	158.759	481.694	475.319	687.056	52.8355	48.3733	37.3573	44.2448	47.491	25.2544	41.9984	49.1719
pgaptmp_000965	pgaptmp_000965	pgaptmp_000965	protein_coding	protein_coding	pgaptmp_000965	0.4132	363				TRUE	2.22389	2.62069e-06	2.95122e-05	Chromosome_I	1017754	1018116	363	-	11.0356	1832.48	2283.02	2469.28	1607.93	1433.05	2455.86	2519.16	1800.07	1926.19	1747.59	2010.05	1222.71	1559.82	1698.2	1358.29	8551.9	5535.07	5700.76	1647.37	1370.53	1191.34	208.014	259.923	283.926	238.629	204.126	331.154	330.432	215.487
pgaptmp_002460	pgaptmp_002460	pgaptmp_002460	protein_coding	protein_coding	pgaptmp_002460	0.4714	210				TRUE	-1.76183	2.64645e-06	2.97382e-05	Chromosome_I	2677968	2678177	210	-	8.82452	1065.42	1224.24	1494.8	698.904	643.131	949.194	1278.51	1117.95	1103.49	183.638	181.412	194.522	220.937	192.019	183.126	176.971	182.416	137.591	614.691	631.423	502.623	209.054	240.929	297.102	179.293	158.352	221.242	289.88	231.335
pgaptmp_000097	pgaptmp_000097	pgaptmp_000097	protein_coding	protein_coding	pgaptmp_000097	0.4684	585			GO:0016020	TRUE	-2.04834	2.65206e-06	2.97382e-05	Chromosome_I	103222	103806	585	+	11.6949	6071.79	9101.29	10212.8	7018.51	6309.79	7459.13	7979.93	6918.93	6777.2	1043.31	892.548	985.578	1109.1	914.588	1134.33	1783.19	1505.93	1525.41	7652.91	7335.59	4985.52	427.68	642.967	728.671	646.328	557.703	624.115	649.495	513.949
pgaptmp_004666	pgaptmp_004666	cueR	protein_coding	protein_coding	pgaptmp_004666	0.4264	387	GO:0045893	GO:0003677,GO:0003700,GO:0005507		TRUE	-2.00306	2.71197e-06	3.03452e-05	Chromosome_II	1581486	1581872	387	+	9.50551	791.738	970.769	1177.05	1345.28	1154.5	1600.68	2080.37	1539.61	1783.33	401.583	395.479	398.307	315.204	338.531	371.522	289.895	348.855	224.908	1332.2	1194.67	1017.71	84.3002	103.668	126.948	187.269	154.25	202.454	255.954	172.877
pgaptmp_002650	pgaptmp_002650	pgaptmp_002650	protein_coding	protein_coding	pgaptmp_002650	0.4861	144				TRUE	-1.93733	2.73564e-06	3.05124e-05	Chromosome_I	2868275	2868418	144	-	7.27553	330.726	427.737	389.628	297.883	237.59	255.647	406.124	282.847	274.466	64.5761	43.5389	44.4622	55.9707	68.8161	69.8251	79.2155	69.2383	59.5345	326.345	309.658	233.45	94.6376	122.76	112.935	111.442	85.3118	86.8983	134.285	85.3545
pgaptmp_002961	pgaptmp_002961	cysD	protein_coding	protein_coding	pgaptmp_002961	0.4719	909	GO:0000103	GO:0004781		TRUE	2.24348	2.73852e-06	3.05124e-05	Chromosome_I	3221774	3222682	909	-	7.73391	118.722	93.2924	90.6682	93.5289	110.602	79.9929	89.8373	126.124	114.009	916.174	640.385	733.626	910.261	637.103	687.711	397.763	543.254	316.194	72.0865	75.8217	98.0322	5.38178	4.24154	4.16325	5.54301	6.29135	4.30745	4.70572	6.02938
pgaptmp_003086	pgaptmp_003086	pgaptmp_003086	protein_coding	protein_coding	pgaptmp_003086	0.4706	408		GO:0022857	GO:0016020	TRUE	1.59457	2.749e-06	3.05644e-05	Chromosome_I	3338907	3339314	408	+	6.70738	85.5724	94.1725	93.9355	41.6396	66.2248	52.7788	74.2457	70.8983	80.9323	139.242	152.386	175.996	150.237	164.271	162.047	208.994	197.063	244.753	72.0865	62.4414	63.1394	8.64235	9.53906	9.60972	5.49807	8.39275	6.33187	8.66451	7.55115
pgaptmp_000143	pgaptmp_000143	secE	protein_coding	protein_coding	pgaptmp_000143	0.4514	381				TRUE	1.61847	2.79145e-06	3.0971e-05	Chromosome_I	146161	146541	381	+	14.4069	18261.6	16190.6	16298.2	9600.8	11868.6	11230.3	10988.4	13961	12991.4	38045.4	40627.3	44614.1	47497	37169.5	41710.6	42162.9	41078.3	42859.6	12357	14195.2	14617.6	1975.02	1756.23	1785.49	1357.52	1610.71	1442.78	1373.22	1592.31
pgaptmp_000607	pgaptmp_000607	zapD	protein_coding	protein_coding	pgaptmp_000607	0.4332	741				TRUE	-1.55905	2.81102e-06	3.1077e-05	Chromosome_I	611157	611897	741	-	12.2562	7056.26	8435.04	8831.58	5646.32	5078.82	5949.16	8473.67	7065.2	7407.07	3408.41	2953.39	3277.23	3502.59	3687.21	3815.35	2218.03	2508.56	2418.42	7875.31	7020.84	6241.66	392.387	470.447	497.463	410.499	354.396	392.98	544.485	414.328
pgaptmp_004797	pgaptmp_004797	pgaptmp_004797	protein_coding	protein_coding	pgaptmp_004797	0.4602	402		GO:0046872		TRUE	-1.59189	2.81283e-06	3.1077e-05	Chromosome_II	1722336	1722737	402	+	6.38398	108.7	115.295	134.777	158.871	170	164.934	187.842	150.006	156.938	36.3241	27.2118	38.9044	32.4041	42.1776	57.968	35.3941	39.9452	43.6586	141.379	140.812	132.925	11.142	11.853	13.9936	21.2903	21.8658	20.0824	22.2484	16.2151
pgaptmp_000982	pgaptmp_000982	pgaptmp_000982	protein_coding	protein_coding	pgaptmp_000982	0.45	360				TRUE	-1.42423	2.82596e-06	3.11567e-05	Chromosome_I	1039062	1039421	360	-	8.56131	445.593	501.667	585.668	668.155	542.087	650.664	666.727	493.303	494.039	242.16	259.419	253.805	122.252	130.972	197.618	262.928	244.997	239.461	748.247	679.21	624.748	51.0028	57.591	67.9031	99.9859	77.8593	88.4681	88.1816	59.5455
pgaptmp_001683	pgaptmp_001683	pgaptmp_001683	protein_coding	protein_coding	pgaptmp_001683	0.4246	252				TRUE	2.25899	2.86119e-06	3.1416e-05	Chromosome_I	1780451	1780702	252	+	9.31506	807.927	505.187	504.801	260.087	365.26	155.038	249.466	523.901	425.071	1327.85	1188.25	1402.41	1047.24	1559.46	1375.42	1715.77	1272.92	1509.53	254.259	249.129	421.206	132.108	82.8502	83.6105	55.601	74.9455	30.1141	47.1349	90.3413
pgaptmp_001646	pgaptmp_001646	pgaptmp_001646	protein_coding	protein_coding	pgaptmp_001646	0.452	615		GO:0016407		TRUE	-2.39235	2.86143e-06	3.1416e-05	Chromosome_I	1719397	1720011	615	+	7.25789	649.117	544.792	613.44	418.317	363.895	244.102	510.811	538.827	496.15	66.5941	19.9553	51.8725	39.7687	36.6279	44.7934	37.0796	43.9397	44.9816	174.908	296.915	311.543	43.4917	36.6098	41.633	36.6433	30.5946	19.428	39.5474	38.0725
pgaptmp_000792	pgaptmp_000792	dinB	protein_coding	protein_coding	pgaptmp_000792	0.4723	1029	GO:0006281	GO:0003684,GO:0003887		TRUE	-1.41823	2.87379e-06	3.14479e-05	Chromosome_I	837017	838045	1029	+	9.83878	2779.18	2652.67	2312.45	1048.68	1185.9	702.618	1275.54	1572.45	1558.83	589.257	540.608	661.375	571.491	582.717	602.076	380.908	392.794	418.065	941.036	1116.3	1185.53	111.291	106.539	93.7989	54.9023	59.5905	33.4223	59.0217	66.4047
pgaptmp_002692	pgaptmp_002692	iscA	protein_coding	protein_coding	pgaptmp_002692	0.4259	324	GO:0016226	GO:0051536		TRUE	1.5288	2.878e-06	3.14479e-05	Chromosome_I	2915958	2916281	324	-	13.0845	6901.3	6881.63	6592.64	3387.54	4194.69	5382.61	5034.6	5478.57	5410.5	14128	16029.6	15672.9	28159.2	17571.4	18445.7	16227.4	15385.6	13036.7	5028.73	5234.25	5220.63	877.696	877.785	849.289	563.253	669.42	813.169	739.866	734.784
pgaptmp_001666	pgaptmp_001666	pgaptmp_001666	protein_coding	protein_coding	pgaptmp_001666	0.4411	492				TRUE	-1.37788	2.88228e-06	3.14479e-05	Chromosome_I	1752635	1753126	492	+	8.60576	645.262	690.892	640.395	655.343	689.557	396.666	441.02	499.273	498.965	242.16	261.234	301.972	247.45	334.091	317.506	200.567	193.068	170.666	473.871	519.92	518.408	54.0418	58.0345	54.328	71.7575	72.4684	39.4632	42.6801	44.0972
pgaptmp_000003	pgaptmp_000003	recF	protein_coding	protein_coding	pgaptmp_000003	0.4537	1080	GO:0006281	GO:0003697,GO:0005524		TRUE	1.63626	2.89189e-06	3.14875e-05	Chromosome_I	2581	3660	1080	+	12.2182	3426.75	2859.5	2988.78	2424.7	2895.46	1972.61	2329.83	2839.66	2831.93	9139.54	7764.44	8966.54	11907	12414.6	11800.4	8951.35	8879.81	9940.94	2677.26	2697.72	3583.16	130.743	109.423	115.508	120.948	138.624	89.4025	102.715	114.256
pgaptmp_000204	pgaptmp_000204	pgaptmp_000204	protein_coding	protein_coding	pgaptmp_000204	0.4529	510				TRUE	-1.84356	2.90132e-06	3.15248e-05	Chromosome_I	222218	222727	510	+	8.62151	281.387	354.687	445.99	338.241	330.441	534.385	498.931	405.24	365.251	201.8	261.234	214.901	312.258	235.307	301.697	320.233	387.468	283.12	1427.2	1144.97	1057.58	22.7348	28.742	36.5002	35.729	33.5018	51.2882	46.5804	34.5286
pgaptmp_005164	pgaptmp_005164	pgaptmp_005164	protein_coding	protein_coding	pgaptmp_005164	0.4724	870	GO:0055085	GO:0022857	GO:0016020	TRUE	1.77296	2.93003e-06	3.17712e-05	Chromosome_II	2130730	2131599	870	+	7.50567	65.5284	63.3684	77.5989	104.419	85.3412	89.0642	95.0345	103.735	81.6361	456.069	321.1	439.064	497.845	521.67	508.537	416.303	495.32	390.282	117.909	140.812	103.017	3.10362	3.0102	3.72287	6.46585	5.07205	5.01091	5.2011	5.18138
pgaptmp_000187	pgaptmp_000187	pgaptmp_000187	protein_coding	protein_coding	pgaptmp_000187	0.4945	1191				TRUE	1.83843	2.94432e-06	3.18132e-05	Chromosome_I	201481	202671	1191	+	9.44707	417.069	477.023	502.351	438.817	473.131	529.437	449.929	498.527	414.514	744.643	930.644	1005.96	1748.35	1172.09	1266.07	1260.71	1516.59	1862.77	369.374	456.842	457.761	14.4296	16.5527	17.605	19.8489	20.5406	21.7588	17.9873	18.1892
pgaptmp_004031	pgaptmp_004031	arfB	protein_coding	protein_coding	pgaptmp_004031	0.4469	414	GO:0006415	GO:0003747		TRUE	-2.56613	2.946e-06	3.18132e-05	Chromosome_II	802014	802427	414	-	8.67157	442.51	578.237	553.811	824.463	761.926	827.967	910.253	797.046	782.581	280.502	197.739	285.299	164.966	256.395	212.11	77.53	142.471	169.343	833.745	789.438	839.92	44.0434	57.7227	55.8345	107.284	95.1604	97.8916	104.687	83.6605
pgaptmp_000201	pgaptmp_000201	pgaptmp_000201	protein_coding	protein_coding	pgaptmp_000201	0.4844	609		GO:0004784,GO:0046872		TRUE	-1.26288	2.99052e-06	3.22278e-05	Chromosome_I	219253	219861	609	-	9.72658	799.447	934.684	1244.85	1254.31	877.307	987.953	871.645	801.524	643.236	639.707	741.976	529.841	456.603	647.093	624.473	635.409	696.378	711.768	1621.67	1657.88	1677.35	54.0917	63.4292	85.318	110.956	74.4866	79.4057	68.1483	57.1922
pgaptmp_005236	pgaptmp_005236	iolG	protein_coding	protein_coding	pgaptmp_005236	0.4975	987	GO:0019310	GO:0050112		TRUE	1.50699	3.02258e-06	3.25066e-05	Chromosome_II	2214010	2214996	987	-	6.28502	41.6298	27.2836	34.3069	46.1238	63.4938	42.8828	36.3804	54.4797	64.0421	133.188	157.829	146.355	159.075	133.192	133.063	163.487	157.118	183.895	49.1753	53.5212	58.1547	1.73798	1.14242	1.45079	2.51752	3.32628	2.12666	1.75502	2.39859
pgaptmp_002521	pgaptmp_002521	pgaptmp_002521	protein_coding	protein_coding	pgaptmp_002521	0.4271	384				TRUE	1.68891	3.03824e-06	3.26084e-05	Chromosome_I	2741667	2742050	384	-	10.6038	1534.91	1227.76	1242.4	766.168	916.906	523.665	749.139	1009.74	974.707	2823.19	2859.06	3045.66	2554.03	3185.52	3234.35	3298.4	2943.96	3103.73	838.774	842.959	1212.94	164.706	132.137	135.043	107.487	123.463	66.7505	92.889	114.266
pgaptmp_000332	pgaptmp_000332	pgaptmp_000332	protein_coding	protein_coding	pgaptmp_000332	0.4628	1197			GO:0019867	TRUE	1.42995	3.05441e-06	3.27152e-05	Chromosome_I	350520	351716	1197	+	10.713	1477.86	1315.77	1314.28	1007.04	1123.77	979.706	968.907	1091.09	1017.64	2118.9	2019.12	2234.22	3520.26	3205.5	3301.54	2914.12	3102.41	3408.02	1113.15	1056.41	1326.76	50.8741	45.4286	45.8284	45.3227	48.5432	40.0622	38.5408	39.6098
pgaptmp_001894	pgaptmp_001894	pgaptmp_001894	protein_coding	protein_coding	pgaptmp_001894	0.4493	957		GO:0003677,GO:0003700		TRUE	-1.30846	3.08581e-06	3.29325e-05	Chromosome_I	2035004	2035960	957	+	9.8083	1403.08	1519.08	1584.65	1094.16	1022.05	1031.66	1633.41	1526.18	1431.45	540.825	536.98	555.777	427.145	472.833	487.458	530.912	533.934	592.699	1440.61	1390.28	1323.43	60.4127	65.6011	69.1135	61.5932	55.2208	52.7664	81.2671	69.2996
pgaptmp_002289	pgaptmp_002289	ycfP	protein_coding	protein_coding	pgaptmp_002289	0.4259	540				TRUE	-1.73011	3.08722e-06	3.29325e-05	Chromosome_I	2487506	2488045	540	-	11.2043	6323.11	7238.08	7709.25	4872.47	3979.63	5381.79	8744.66	6578.62	6810.98	617.509	671.225	628.028	478.697	630.444	635.013	1375.32	1025.26	1117.93	4526.92	3761.14	3444.42	482.498	553.951	595.881	486.093	381.06	487.827	771.049	529.393
pgaptmp_004707	pgaptmp_004707	choV	protein_coding	protein_coding	pgaptmp_004707	0.4793	1185	GO:0015871	GO:0015220	GO:0055052	TRUE	1.88478	3.12239e-06	3.32402e-05	Chromosome_II	1623358	1624542	1185	-	6.36692	63.2157	39.6053	45.7425	46.7644	54.6184	33.8114	48.2597	76.1224	60.5233	100.9	76.1931	96.3347	207.681	183.139	177.856	229.219	182.416	223.585	39.1167	52.8841	61.4778	2.19819	1.38126	1.61118	2.12599	2.38322	1.39662	1.9391	2.79146
pgaptmp_001138	pgaptmp_001138	pgaptmp_001138	protein_coding	protein_coding	pgaptmp_001138	0.4245	1272				TRUE	-1.51636	3.14439e-06	3.334e-05	Chromosome_I	1207652	1208923	1272	+	10.7454	2584.13	3137.62	3401.28	2608.56	2572.52	3297.03	3698.92	3315.8	3095.84	910.12	919.76	892.949	717.309	717.019	718.012	992.722	870.805	859.943	2848.81	2745.51	2246.43	83.7117	101.942	111.608	110.478	104.572	126.873	138.459	113.276
pgaptmp_004005	pgaptmp_004005	pgaptmp_004005	protein_coding	protein_coding	pgaptmp_004005	0.4199	543				TRUE	-1.68202	3.14444e-06	3.334e-05	Chromosome_II	773725	774267	543	-	7.69082	234.361	243.792	272.005	366.428	339.999	379.348	439.535	378.373	396.92	159.422	126.989	87.0718	113.414	123.203	97.4916	89.3281	109.183	91.2862	367.697	337.056	286.62	17.7845	18.555	20.9082	36.3541	32.3759	34.1956	38.5413	30.2801
pgaptmp_000966	pgaptmp_000966	pgaptmp_000966	protein_coding	protein_coding	pgaptmp_000966	0.2467	300				TRUE	1.72048	3.15157e-06	3.33483e-05	Chromosome_I	1018300	1018599	300	+	7.15332	150.33	140.819	144.579	103.138	98.9958	109.681	115.823	97.765	124.565	90.8102	121.546	94.4821	144.346	152.061	139.65	492.147	368.827	336.039	119.027	115.963	108.832	20.6482	19.3991	20.1152	18.5209	17.0624	17.8954	18.3826	14.1612
pgaptmp_002630	pgaptmp_002630	dnaJ	protein_coding	protein_coding	pgaptmp_002630	0.4778	1149	GO:0006457,GO:0009408	GO:0005515,GO:0005524		TRUE	1.79108	3.16714e-06	3.34458e-05	Chromosome_I	2844134	2845282	1149	-	12.8568	4098.23	3939.4	3375.96	3525.91	4104.57	3143.64	2868.11	3280.73	3359.04	16929	14638.1	17975.7	31432	29794	29351.6	13362.1	13745.1	15658.9	3336.66	4214.8	4842.63	146.972	141.694	122.636	165.316	184.71	133.92	118.853	124.076
pgaptmp_000404	pgaptmp_000404	pgaptmp_000404	protein_coding	protein_coding	pgaptmp_000404	0.4818	963				TRUE	1.36599	3.18314e-06	3.35028e-05	Chromosome_I	443071	444033	963	+	9.31804	501.871	520.149	486.014	433.051	507.268	437.074	407.609	447.032	444.072	768.859	638.571	750.299	877.857	831.342	878.742	1380.37	1330.17	1325.64	447.607	556.238	549.977	21.4745	22.3225	21.0651	24.2258	27.2367	22.2158	20.1535	20.1721
pgaptmp_004165	pgaptmp_004165	icmH	protein_coding	protein_coding	pgaptmp_004165	0.4583	792				TRUE	-1.65681	3.18528e-06	3.35028e-05	Chromosome_II	1005737	1006528	792	+	6.0831	60.9029	71.2895	68.6138	79.4355	92.1685	106.382	114.338	100.004	107.675	72.6481	43.5389	44.4622	47.1332	36.6279	44.7934	32.0233	30.6246	35.7207	109.527	136.352	123.786	3.16863	3.71999	3.61599	5.40323	6.01729	6.57471	6.87385	5.48693
pgaptmp_003294	pgaptmp_003294	pgaptmp_003294	protein_coding	protein_coding	pgaptmp_003294	0.4268	396				TRUE	-1.9152	3.214e-06	3.36915e-05	Chromosome_II	31408	31803	396	+	6.08604	91.7398	110.895	88.2177	163.355	182.289	108.856	128.445	132.095	148.493	58.5221	29.0259	20.3785	23.5666	27.7484	32.9363	20.2252	34.6192	25.1368	120.144	123.609	137.079	9.54599	11.5733	9.29826	22.223	23.8017	13.4552	15.4438	14.4953
pgaptmp_005285	pgaptmp_005285	pgaptmp_005285	protein_coding	protein_coding	pgaptmp_005285	0.4309	246				TRUE	-1.70665	3.21603e-06	3.36915e-05	Chromosome_II	2270250	2270495	246	+	7.47483	210.462	257.874	266.287	368.35	242.369	470.061	755.822	435.092	527.82	74.6661	63.4943	68.5459	44.1874	66.5962	54.0156	117.98	81.2219	83.3483	318.522	337.056	324.836	35.253	43.3226	45.181	80.6658	50.9431	93.5302	146.291	76.8569
pgaptmp_001052	pgaptmp_001052	pgaptmp_001052	protein_coding	protein_coding	pgaptmp_001052	0.5085	936				TRUE	1.86248	3.23404e-06	3.38127e-05	Chromosome_I	1116655	1117590	936	+	6.41918	64.7575	65.1286	69.4306	39.7177	62.1284	71.7462	58.6541	69.4057	57.7083	104.936	97.9626	94.4821	241.558	162.051	152.825	158.431	175.759	197.125	32.411	47.1496	48.1853	2.85084	2.87566	3.09611	2.28598	3.43209	3.75194	2.9837	3.22223
pgaptmp_000922	pgaptmp_000922	pgaptmp_000922	protein_coding	protein_coding	pgaptmp_000922	0.4785	744	GO:0017004	GO:0015232,GO:0020037	GO:0016020	TRUE	1.58274	3.24578e-06	3.38682e-05	Chromosome_I	968745	969488	744	+	10.9534	1537.22	1605.33	1742.3	1284.42	1461.72	1260.92	1271.83	1547.08	1315.33	2092.67	2146.11	2389.84	3511.43	3212.16	3694.14	3827.62	3724.22	4445.24	1119.86	1490.31	1389.07	85.1376	89.1731	97.7442	93.0033	101.587	82.9558	81.3933	90.36
pgaptmp_005212	pgaptmp_005212	pgaptmp_005212	protein_coding	protein_coding	pgaptmp_005212	0.4729	1125			GO:0019867	TRUE	1.3262	3.28537e-06	3.42134e-05	Chromosome_II	2183161	2184285	1125	+	8.73468	246.695	241.152	222.178	228.697	284.698	299.355	221.995	228.367	269.54	952.498	1086.66	1374.62	882.275	708.139	895.869	699.456	631.134	689.277	271.023	238.934	281.635	9.0358	8.8589	8.24308	10.9515	13.0851	13.0247	9.39556	8.82101
pgaptmp_000541	pgaptmp_000541	pgaptmp_000541	protein_coding	protein_coding	pgaptmp_000541	0.5029	1209	GO:0006744	GO:0016709		TRUE	1.82219	3.30612e-06	3.43614e-05	Chromosome_I	548540	549748	1209	+	11.08	2004.4	1562.21	1585.47	1134.52	1504.74	950.018	1093.64	1705.29	1640.46	2564.88	3149.32	3193.87	4845.89	3700.53	4418.74	4144.49	4604.35	5213.9	1055.59	1280.69	1615.04	68.315	53.4016	54.7359	50.5533	64.3543	38.4626	43.0706	61.2928
pgaptmp_001453	pgaptmp_001453	pgaptmp_001453	protein_coding	protein_coding	pgaptmp_001453	0.375	240				TRUE	-1.92727	3.34331e-06	3.46794e-05	Chromosome_I	1504881	1505120	240	-	6.06064	97.1363	146.98	138.044	141.574	155.662	188.849	169.28	141.797	166.791	28.252	27.2118	38.9044	23.5666	21.0888	22.3967	25.2815	19.9726	19.8448	125.173	107.042	88.8936	16.6774	25.3097	24.0076	31.7788	33.5364	38.5156	33.5836	25.6739
pgaptmp_000238	pgaptmp_000238	pgaptmp_000238	protein_coding	protein_coding		0.5	1000				TRUE	2.40626	3.35745e-06	3.47575e-05	pgaptmp_000238	1	1000	1000	+	11.9019	1153.3	1099.27	1291.41	1588.71	1981.28	3635.96	931.784	1036.61	880.403	13575.1	16802.4	17940.5	11490.2	7239	8353.97	15767.2	13514.8	11549.7	3450.65	2064.39	2163.35	47.5227	45.4302	53.902	85.5872	102.445	177.972	44.3658	45.0455
pgaptmp_001944	pgaptmp_001944	pgaptmp_001944	protein_coding	protein_coding	pgaptmp_001944	0.4685	2286				TRUE	1.50897	3.38724e-06	3.49971e-05	Chromosome_I	2097060	2099345	2286	-	7.9935	235.902	227.07	216.46	183.214	210.963	190.498	152.946	229.86	199.164	322.881	326.542	329.761	435.982	440.645	412.363	353.941	419.424	465.692	138.585	138.9	142.064	4.25221	4.10512	3.95223	4.31764	4.77172	4.07895	3.18563	4.36942
pgaptmp_004291	pgaptmp_004291	pgaptmp_004291	protein_coding	protein_coding	pgaptmp_004291	0.4381	735		GO:0005524,GO:0016887,GO:0042626,GO:0140359		TRUE	-1.45588	3.48787e-06	3.59661e-05	Chromosome_II	1143051	1143785	735	-	10.2668	1391.52	1250.65	1292.23	1744.38	1650.16	1001.97	1699.48	1764.25	1863.56	1051.38	1048.56	898.507	1254.92	1447.36	1399.14	515.743	635.128	609.898	1528.9	1524.72	1847.66	78.0116	70.3216	73.3824	127.855	116.087	66.7269	110.094	104.306
pgaptmp_004285	pgaptmp_004285	pgaptmp_004285	protein_coding	protein_coding	pgaptmp_004285	0.4706	954		GO:0003824		TRUE	2.20549	3.51495e-06	3.61744e-05	Chromosome_II	1137779	1138732	954	-	9.57657	346.915	342.365	316.93	322.226	329.076	226.784	402.412	506.736	489.817	1791.99	1295.28	1324.6	3666.08	4862.63	4524.14	1168.01	1671.04	1961.99	275.493	368.277	382.159	14.9842	14.8314	13.8662	18.196	17.8357	11.6358	20.0842	23.0819
pgaptmp_002171	pgaptmp_002171	pgaptmp_002171	protein_coding	protein_coding	pgaptmp_002171	0.4747	396				TRUE	1.50156	3.5408e-06	3.62394e-05	Chromosome_I	2355932	2356327	396	-	7.97385	238.986	249.953	241.782	105.06	165.221	173.18	219.025	234.338	172.421	387.457	536.98	492.789	173.804	184.249	200.253	578.104	447.386	579.469	190.554	172.032	187.757	24.8677	26.0859	25.4841	14.2924	21.5731	21.406	26.3349	25.7149
pgaptmp_002640	pgaptmp_002640	smpB	protein_coding	protein_coding	pgaptmp_002640	0.463	486		GO:0003723		TRUE	-1.39481	3.54295e-06	3.62394e-05	Chromosome_I	2855943	2856428	486	+	12.767	8917.26	9367.96	9979.22	6516.91	8043.24	7365.12	9207.21	9705.6	8963.78	7032.74	8464.69	8138.43	7099.44	5982.56	6456.84	2804.56	3351.4	3011.12	8077.6	8216.14	7916.52	756.055	796.619	857.041	722.387	855.733	741.782	902.038	867.808
pgaptmp_002051	pgaptmp_002051	pgaptmp_002051	protein_coding	protein_coding	pgaptmp_002051	0.4307	822				TRUE	3.45977	3.54786e-06	3.62394e-05	Chromosome_I	2216730	2217551	822	-	7.90636	215.087	118.816	139.678	74.9512	118.795	62.6748	73.5033	147.767	140.048	328.935	790.957	433.506	1355.08	735.888	781.25	566.306	1351.48	924.769	56.9986	70.7245	109.663	10.7821	5.97371	7.09247	4.91214	7.47257	3.73211	4.25763	7.81165
pgaptmp_002497	pgaptmp_002497	flgN	protein_coding	protein_coding	pgaptmp_002497	0.4577	426	GO:0044780	GO:0005515		TRUE	-1.80553	3.54882e-06	3.62394e-05	Chromosome_I	2715466	2715891	426	+	10.9111	3002.74	3634.88	3616.11	2886.58	2651.04	2508.64	3240.83	2665.78	2648.25	1358.12	1464	1359.8	723.201	899.048	865.567	1055.08	1067.87	800.408	4113.4	3048.16	3131.22	290.447	352.633	354.301	365.038	321.774	288.245	362.225	271.926
pgaptmp_001996	pgaptmp_001996	vmeI	protein_coding	protein_coding	pgaptmp_001996	0.4553	3108				TRUE	1.60874	3.57499e-06	3.64358e-05	Chromosome_I	2160824	2163931	3108	-	11.2309	2776.09	2326.15	2420.27	1134.52	1357.95	1432.45	1508.67	1870.22	1705.21	3035.08	2975.16	3134.58	6685.56	5723.94	5564.93	3070.86	4142.31	4113.17	1136.06	1243.73	1331.74	36.8054	30.9313	32.503	19.665	22.5916	22.5596	23.1125	26.1487
pgaptmp_002971	pgaptmp_002971	rplQ	protein_coding	protein_coding	pgaptmp_002971	0.4724	381	GO:0006412	GO:0003735	GO:0005840	TRUE	2.2113	3.59642e-06	3.65833e-05	Chromosome_I	3231793	3232173	381	-	16.1295	74866.6	54334	47870.4	27290.6	29350.5	15290.2	25596.2	44389	40283.9	218586	177436	230010	135573	181844	190566	185337	164625	148805	31936	30161.1	46081	8096.95	5893.71	5244.24	3858.8	3983.23	1964.36	3198.77	5062.77
pgaptmp_002756	pgaptmp_002756	pgaptmp_002756	protein_coding	protein_coding	pgaptmp_002756	0.4152	330				TRUE	-1.57488	3.60877e-06	3.6638e-05	Chromosome_I	2984344	2984673	330	-	10.4081	1903.41	2461.69	2354.92	1745.66	1650.16	1786.23	2594.89	1856.04	2154.91	776.931	743.79	694.722	867.546	768.076	833.948	805.638	713.687	730.29	2689.55	2054.83	2014.65	237.671	308.291	297.854	284.977	258.556	264.946	374.401	244.406
pgaptmp_004073	pgaptmp_004073	pgaptmp_004073	protein_coding	protein_coding	pgaptmp_004073	0.4528	879	GO:0006355	GO:0003677,GO:0003700		TRUE	-1.62966	3.64465e-06	3.68939e-05	Chromosome_II	861937	862815	879	-	9.565	963.653	1151.19	1185.22	1275.45	1230.28	1259.27	1609.65	1364.23	1436.37	419.745	368.267	405.717	344.662	386.258	412.363	448.326	380.811	332.07	1386.41	1165.36	1095.8	45.1742	54.1254	56.2797	78.1699	72.37	70.1233	87.1916	67.443
pgaptmp_002411	pgaptmp_002411	tsaB	protein_coding	protein_coding	pgaptmp_002411	0.4943	702	GO:0002949			TRUE	1.4085	3.648e-06	3.68939e-05	Chromosome_I	2621355	2622056	702	-	10.3453	1066.19	999.813	979.38	623.312	785.822	691.072	763.246	778.389	798.767	2211.73	2441.81	2923.39	2931.1	2452.96	2769.29	1887.69	2061.17	2399.9	778.981	751.208	854.043	62.5827	58.8604	58.2311	47.8336	57.8803	48.1858	51.7679	48.1833
pgaptmp_000877	pgaptmp_000877	pgaptmp_000877	protein_coding	protein_coding	pgaptmp_000877	0.4383	486				TRUE	-1.2329	3.68238e-06	3.71701e-05	Chromosome_I	922029	922514	486	+	11.3306	4038.86	4364.5	4827.47	3378.57	3264.81	2579.56	3354.42	3142.66	3243.63	1511.48	2024.56	1593.23	1531.83	1535.04	1487.41	1762.97	1559.19	1726.5	3873.11	4000.71	4055.04	342.437	371.142	414.595	374.508	347.349	259.802	328.635	280.995
pgaptmp_002802	pgaptmp_002802	pgaptmp_002802	protein_coding	protein_coding	pgaptmp_002802	0.4289	471				TRUE	-1.91526	3.70319e-06	3.73086e-05	Chromosome_I	3036693	3037163	471	+	11.4765	4512.98	7213.44	6279.8	5911.54	5879.67	6733.42	8086.84	6151.73	6776.5	1182.55	1102.99	1094.88	913.206	785.835	683.759	1661.84	1220.99	1173.49	5758.54	5386.53	4208.74	394.822	632.941	556.5	676.151	645.469	699.757	817.506	567.563
pgaptmp_000219	pgaptmp_000219	frdA	protein_coding	protein_coding	pgaptmp_000219	0.4904	1821	GO:0009061	GO:0000104		TRUE	-2.87635	3.71388e-06	3.73447e-05	Chromosome_I	236299	238119	1821	-	11.0096	16017.5	10344	7731.3	4925	5403.8	2875.62	6996.18	10622.8	10776.7	306.737	281.189	268.626	497.845	529.44	513.807	552.823	655.101	584.761	2716.94	4170.19	6554.03	362.445	234.758	177.208	145.7	153.438	77.2955	182.929	253.493
pgaptmp_004219	pgaptmp_004219	pgaptmp_004219	protein_coding	protein_coding	pgaptmp_004219	0.3979	480				TRUE	-1.71972	3.75481e-06	3.76565e-05	Chromosome_II	1069217	1069696	480	-	8.70757	358.479	441.819	425.569	620.109	552.328	635.819	454.384	377.627	460.259	429.835	475.3	422.391	263.652	338.531	324.094	215.736	237.008	190.51	858.891	706.607	615.609	30.7738	38.0403	37.0058	69.5971	59.4976	64.8374	45.0728	34.1868
pgaptmp_000914	pgaptmp_000914	pgaptmp_000914	protein_coding	protein_coding	pgaptmp_000914	0.4815	2241	GO:0006935,GO:0007165	GO:0000155,GO:0005524		TRUE	1.91922	3.75921e-06	3.76565e-05	Chromosome_I	960839	963079	2241	+	13.0609	10007.3	7844.48	7020.66	3996.12	5114.33	3615.35	4912.84	7357	6405.62	12287.6	14465.8	15120.8	16671.9	14322.6	15386.5	15335.8	15670.5	19354	3808.85	4013.45	5547.13	184.007	144.665	130.761	96.064	118.002	78.9661	104.381	142.658
pgaptmp_000075	pgaptmp_000075	dapF	protein_coding	protein_coding	pgaptmp_000075	0.503	831	GO:0009089	GO:0008837		TRUE	2.0422	3.78631e-06	3.78559e-05	Chromosome_I	82485	83315	831	+	11.617	3194.7	2344.63	2499.5	1769.36	2032.49	1557.8	2010.57	2985.94	2798.85	2845.38	3080.38	3249.44	6585.4	5581.87	5991.78	7115.91	7216.76	8338.8	1312.65	1939.51	2260.56	158.412	116.604	125.543	114.704	126.465	91.7578	115.2	156.141
pgaptmp_003912	pgaptmp_003912	pgaptmp_003912	protein_coding	protein_coding	pgaptmp_003912	0.4671	486		GO:0047617		TRUE	-1.50596	3.80693e-06	3.79899e-05	Chromosome_II	683125	683610	486	-	8.71426	412.444	520.149	512.97	748.231	582.368	837.039	1478.97	1095.57	1123.9	143.278	166.899	194.522	154.656	156.501	177.856	256.186	234.345	296.35	671.69	774.783	847.397	34.9693	44.2317	44.0551	82.9399	61.9591	84.3028	144.896	97.9579
pgaptmp_002200	pgaptmp_002200	pgaptmp_002200	protein_coding	protein_coding	pgaptmp_002200	0.4667	570				TRUE	1.40319	3.83679e-06	3.82153e-05	Chromosome_I	2384717	2385286	570	-	9.85207	955.173	858.994	1068.41	632.281	570.762	573.969	766.958	829.883	844.511	1107.88	1110.24	1163.43	1116.47	1104.39	1067.14	1670.27	1579.17	1673.58	517.458	662.644	670.441	69.0503	62.2812	78.2359	59.7584	51.7755	49.2886	64.0663	63.2673
pgaptmp_001932	pgaptmp_001932	pgaptmp_001932	protein_coding	protein_coding	pgaptmp_001932	0.4418	498	GO:0000160			TRUE	-1.92559	3.85791e-06	3.82467e-05	Chromosome_I	2083765	2084262	498	+	8.5098	1002.2	925.883	1003.89	862.9	750.32	582.216	852.341	1040.34	1027.49	106.954	116.104	94.4821	136.981	132.082	151.507	106.182	154.455	174.635	524.164	614.857	603.147	82.9245	76.8366	84.1387	93.3459	77.9042	57.2252	81.4923	90.7785
pgaptmp_002331	pgaptmp_002331	nagE	protein_coding	protein_coding	pgaptmp_002331	0.4667	1455	GO:0009401	GO:0008982,GO:0015572	GO:0016020	TRUE	1.34557	3.85856e-06	3.82467e-05	Chromosome_I	2532484	2533938	1455	+	7.68072	226.651	234.991	181.336	140.934	176.144	139.369	153.689	161.2	145.678	189.692	244.906	211.195	284.272	277.484	285.887	355.627	350.186	378.375	146.967	125.52	138.741	6.41879	6.67468	5.20191	5.21815	6.25964	4.68852	5.02935	4.81438
pgaptmp_002188	pgaptmp_002188	pgaptmp_002188	protein_coding	protein_coding	pgaptmp_002188	0.4076	1494				TRUE	-1.46161	3.86176e-06	3.82467e-05	Chromosome_I	2368459	2369952	1494	-	8.54342	732.377	926.763	876.459	753.356	678.633	656.436	995.635	861.974	902.923	153.368	186.855	116.713	164.966	136.522	150.19	190.454	171.764	146.852	467.724	449.196	535.023	20.1996	25.6366	24.4862	27.1652	23.487	21.5067	31.7309	25.0715
pgaptmp_002392	pgaptmp_002392	fabG	protein_coding	protein_coding	pgaptmp_002392	0.5028	726		GO:0016491		TRUE	2.51953	3.91962e-06	3.87146e-05	Chromosome_I	2603871	2604596	726	+	11.0709	1867.95	1429.31	1397.6	671.998	878.673	478.308	798.884	1183.63	1131.65	3612.23	3165.64	3154.96	10989.4	11173.7	12688.4	4636.63	5629.61	6718.14	717.512	869.083	1377.44	106.02	81.3638	80.3501	49.865	62.5798	32.2481	52.3938	70.8461
pgaptmp_004580	pgaptmp_004580	pgaptmp_004580	protein_coding	protein_coding	pgaptmp_004580	0.4607	573				TRUE	2.09129	3.92372e-06	3.87146e-05	Chromosome_II	1469515	1470087	573	-	6.74884	107.929	115.295	101.287	112.747	118.112	92.3629	120.278	158.961	169.606	157.404	107.033	155.618	86.9019	86.575	114.618	210.679	214.372	141.56	38.5579	28.6721	45.693	7.76144	8.3157	7.37802	10.6002	10.6582	7.88998	9.99458	12.0552
pgaptmp_001858	pgaptmp_001858	pgaptmp_001858	protein_coding	protein_coding	pgaptmp_001858	0.4526	612				TRUE	-1.72317	3.96045e-06	3.90038e-05	Chromosome_I	1989084	1989695	612	-	6.3072	378.523	299.24	199.307	251.119	243.734	153.388	123.99	200.754	227.314	18.162	41.7248	14.8207	23.5666	32.1882	36.8887	21.9107	22.6356	26.4598	87.1744	94.9364	117.14	25.4859	20.2074	13.5929	22.1051	20.5925	12.268	9.64649	14.2545
pgaptmp_003680	pgaptmp_003680	pgaptmp_003680	protein_coding	protein_coding	pgaptmp_003680	0.4752	444	GO:0008643,GO:0009401,GO:0016310	GO:0016301	GO:1902495	TRUE	-2.28262	3.98441e-06	3.91664e-05	Chromosome_II	436563	437006	444	-	8.5705	2049.88	2082.36	1739.03	893.008	747.589	952.492	1253.27	1320.2	1294.21	46.4141	145.13	68.5459	73.6457	61.0465	52.6982	106.182	133.151	201.094	653.249	797.721	814.997	190.241	193.827	163.48	108.352	87.061	105.005	134.398	129.21
pgaptmp_002680	pgaptmp_002680	bamB	protein_coding	protein_coding	pgaptmp_002680	0.4634	1161		GO:0005515		TRUE	1.56469	4.05649e-06	3.98005e-05	Chromosome_I	2903839	2904999	1161	-	12.8628	6168.92	5476.09	5574.87	4021.74	4736.09	3744	4248.34	5172.59	4919.28	12301.7	12724.2	14589.2	13502.2	13476.8	14124.4	13116.1	12940.9	14756.6	4070.37	4401.48	5366.85	218.945	194.93	200.421	186.615	210.927	157.847	174.229	193.604
pgaptmp_002986	pgaptmp_002986	rplX	protein_coding	protein_coding	pgaptmp_002986	0.4151	318	GO:0006412	GO:0003735	GO:0005840	TRUE	2.11119	4.11363e-06	4.02118e-05	Chromosome_I	3239645	3239962	318	-	16.7686	106266	81769.9	66731.8	37227	51011.5	39447.2	41360.1	79940.4	68580.7	297191	331444	406986	298037	221801	237356	247853	220324	212922	46957.9	45075.7	66303	13769.8	10626.9	8758.84	6306.61	8294.4	6071.86	6192.8	10923.9
pgaptmp_002294	pgaptmp_002294	hinT	protein_coding	protein_coding	pgaptmp_002294	0.4416	351				TRUE	-1.30873	4.1137e-06	4.02118e-05	Chromosome_I	2491642	2491992	351	-	10.3714	1866.4	2341.11	1819.08	1934.64	1512.25	2180.42	2482.78	1888.13	2057.79	1023.13	780.072	879.981	905.842	701.48	654.775	706.197	806.893	703.83	1718.34	1783.4	2051.2	219.107	275.649	216.315	296.932	222.771	304.065	336.793	233.756
pgaptmp_004182	pgaptmp_004182	pgaptmp_004182	protein_coding	protein_coding	pgaptmp_004182	0.4373	1221				TRUE	-1.61571	4.12146e-06	4.02129e-05	Chromosome_II	1022005	1023225	1221	-	7.62037	319.162	334.444	337.351	442.02	376.867	324.095	481.112	453.003	479.964	125.116	47.1672	85.2192	51.552	92.1247	85.6345	116.295	101.194	79.3793	300.64	316.667	348.097	10.7709	11.3201	11.5321	19.5025	15.9594	12.9924	18.7613	16.1221
pgaptmp_001974	pgaptmp_001974	pgaptmp_001974	protein_coding	protein_coding	pgaptmp_001974	0.4672	1815				TRUE	-2.00052	4.16875e-06	4.0599e-05	Chromosome_I	2133304	2135118	1815	-	7.03813	382.378	437.418	368.391	269.696	255.341	230.907	263.572	241.801	264.614	68.6121	41.7248	35.1992	61.8624	72.1459	40.8411	62.3611	41.2767	34.3977	199.495	193.696	236.773	8.68109	9.96005	8.47175	8.00502	7.27424	6.22721	6.91442	5.78919
pgaptmp_005286	pgaptmp_005286	pgaptmp_005286	protein_coding	protein_coding	pgaptmp_005286	0.4778	1488	GO:0055085	GO:0022857		TRUE	-1.48093	4.2185e-06	4.10075e-05	Chromosome_II	2270591	2272078	1488	-	10.7248	1658.25	1761.99	1866.46	1958.34	2296.7	2246.4	2730.76	3178.48	2979.01	1678.98	2303.93	2015.62	988.325	754.757	737.774	874.741	966.673	800.408	2102.24	2748.7	2591.21	45.9205	48.9377	52.3548	70.9005	79.8078	73.8952	87.3802	92.8227
pgaptmp_000958	pgaptmp_000958	pgaptmp_000958	protein_coding	protein_coding	pgaptmp_000958	0.4598	1107	GO:0000160			TRUE	-1.40667	4.24322e-06	4.11718e-05	Chromosome_I	1011889	1012995	1107	+	10.8226	3069.81	3887.48	4218.11	3140.9	3176.74	3066.94	4669.31	4359.87	4228.89	633.653	781.886	679.901	854.29	742.547	819.456	862.943	878.794	1005.47	2404	2704.73	2232.31	114.267	145.132	159.042	152.852	148.381	135.61	200.834	171.145
pgaptmp_001280	pgaptmp_001280	pgaptmp_001280	protein_coding	protein_coding	pgaptmp_001280	0.4076	579				TRUE	-1.66324	4.28083e-06	4.14602e-05	Chromosome_I	1365359	1365937	579	-	9.72442	2269.6	3029.36	2377.79	1233.81	1079.4	1368.13	2001.66	1438.86	1602.46	401.583	331.984	348.287	334.351	364.059	317.506	426.415	426.082	325.455	1477.49	1121.4	1193	161.521	216.229	171.41	114.798	96.3931	115.659	164.606	107.989
pgaptmp_001506	pgaptmp_001506	pgaptmp_001506	protein_coding	protein_coding	pgaptmp_001506	0.4489	675	GO:0006355	GO:0003700,GO:0030552		TRUE	-1.34942	4.30124e-06	4.15813e-05	Chromosome_I	1557647	1558321	675	-	8.00782	343.061	404.854	377.376	343.366	348.192	301.829	289.558	299.265	241.39	260.322	232.208	259.363	209.154	269.715	291.157	121.351	107.852	107.162	315.728	295.004	288.281	20.9423	24.7877	23.3352	27.4043	26.6722	21.8872	20.4251	19.2659
pgaptmp_004848	pgaptmp_004848	hutX	protein_coding	protein_coding	pgaptmp_004848	0.4722	504				TRUE	-1.43296	4.31174e-06	4.16063e-05	Chromosome_II	1772505	1773008	504	-	9.6065	504.954	454.14	628.96	1641.24	1532.04	1237	648.165	831.376	772.024	799.129	954.228	766.973	409.47	499.471	357.03	539.339	619.15	537.134	1398.7	1431.69	1815.26	41.2838	37.2393	52.0875	175.431	157.175	120.136	61.2333	71.681
pgaptmp_003131	pgaptmp_003131	glnL	protein_coding	protein_coding	pgaptmp_003131	0.4909	1047	GO:0006355,GO:0007165,GO:0016310	GO:0000155		TRUE	1.31748	4.35442e-06	4.19412e-05	Chromosome_I	3389744	3390790	1047	+	8.97693	426.32	383.731	351.237	302.367	350.923	310.9	363.804	417.18	395.513	734.553	992.324	733.626	602.422	790.275	741.727	815.751	886.783	878.465	302.316	346.614	374.682	16.7783	15.1468	14.0022	15.5579	17.3304	14.5347	16.5445	17.3147
pgaptmp_001837	pgaptmp_001837	pgaptmp_001837	protein_coding	protein_coding	pgaptmp_001837	0.4224	438	GO:0006355	GO:0003700		TRUE	-1.59277	4.37527e-06	4.2065e-05	Chromosome_I	1968546	1968983	438	+	8.43978	439.426	516.629	569.331	579.751	482.69	629.222	536.797	440.316	460.962	209.872	226.765	200.08	169.385	186.469	204.205	176.971	210.378	182.572	693.483	554.964	528.377	41.3399	48.7468	54.254	71.3069	56.982	70.3174	58.3537	43.6845
pgaptmp_004989	pgaptmp_004989	pgaptmp_004989	protein_coding	protein_coding	pgaptmp_004989	0.4215	726				TRUE	-1.73781	4.39572e-06	4.21844e-05	Chromosome_II	1941705	1942430	726	-	9.60156	512.664	669.769	649.381	1182.56	1088.95	1580.07	1521.3	1241.09	1185.13	548.897	771.002	435.359	674.594	512.791	386.014	414.617	505.972	329.424	1529.46	1406.21	1301.83	29.0974	38.1268	37.3339	87.751	77.5562	106.53	99.7722	74.2857
pgaptmp_000630	pgaptmp_000630	gluQRS	protein_coding	protein_coding	pgaptmp_000630	0.4576	885	GO:0043039	GO:0004812		TRUE	1.21391	4.50304e-06	4.31357e-05	Chromosome_I	637362	638246	885	-	11.4426	2026.76	2249.58	2401.48	1604.72	1571.64	2085.59	2112.29	1911.27	1806.55	3951.25	2937.06	3747.79	5292.18	5717.28	5600.5	4633.26	4255.49	4720.42	1997.75	1947.79	1917.44	94.3662	105.051	113.26	97.6835	91.8237	115.35	113.643	93.846
pgaptmp_002432	pgaptmp_002432	sdhC	protein_coding	protein_coding	pgaptmp_002432	0.4631	393	GO:0006099	GO:0000104,GO:0009055	GO:0016020,GO:0045273	TRUE	2.31364	4.56153e-06	4.36033e-05	Chromosome_I	2647922	2648314	393	-	8.92303	524.998	436.538	483.564	378.6	425.34	507.171	599.906	597.785	565.823	278.484	408.177	213.048	234.193	246.406	223.967	2116.91	1374.11	2472.67	326.345	471.496	382.159	55.0457	45.9062	51.3573	51.8982	55.9613	63.1677	72.6814	66.0982
pgaptmp_000243	pgaptmp_000243	pgaptmp_000243	protein_coding	protein_coding		0.5	1000				TRUE	2.15478	4.56843e-06	4.36033e-05	pgaptmp_000243	1	1000	1000	+	11.0266	679.954	766.582	988.365	835.994	1041.16	1614.7	740.972	674.653	632.68	6469.72	6022.88	7930.94	5267.14	3710.52	4408.2	7690.64	6441.83	5606.83	1937.39	1265.39	1205.46	28.018	31.6811	41.2533	45.0368	53.8347	79.036	35.2805	29.3169
pgaptmp_004252	pgaptmp_004252	pgaptmp_004252	protein_coding	protein_coding	pgaptmp_004252	0.381	231				TRUE	-1.73676	4.58558e-06	4.36876e-05	Chromosome_II	1103001	1103231	231	+	6.81927	94.8235	110.895	104.554	203.714	204.136	192.972	193.781	117.915	133.714	76.6841	52.6095	98.1873	82.4832	120.983	77.7298	45.5068	54.5917	62.1805	234.7	179.041	193.572	16.9146	19.8399	18.8917	47.5086	45.6932	40.8899	39.9423	22.1817
pgaptmp_004442	pgaptmp_004442	pgaptmp_004442	protein_coding	protein_coding	pgaptmp_004442	0.4485	903				TRUE	-1.8956	4.60687e-06	4.38111e-05	Chromosome_II	1310011	1310913	903	-	9.51689	648.346	703.213	720.445	1524.65	1675.42	1152.89	908.025	838.092	976.818	621.545	633.128	631.734	347.608	467.283	440.03	431.471	306.246	342.654	1452.35	1554.66	1076.69	29.5854	32.1841	33.3007	90.9591	95.9355	62.493	47.8788	40.3312
pgaptmp_002573	pgaptmp_002573	pgaptmp_002573	protein_coding	protein_coding	pgaptmp_002573	0.4367	900				TRUE	-1.67518	4.63708e-06	4.40188e-05	Chromosome_I	2777748	2778647	900	+	14.2944	31026.6	32355.7	34832.1	30035.6	28250.7	29069.6	30975.3	29301.1	31244.1	12323.9	12891.1	11545.3	10531.3	10337.9	10898	10879.5	11783.8	8895.78	31236.4	32720.6	37194.9	1420.53	1485.77	1615.39	1797.87	1623.04	1580.99	1638.72	1414.75
pgaptmp_000232	pgaptmp_000232	pgaptmp_000232	protein_coding	protein_coding	pgaptmp_000232	0.4562	1416	GO:0006820	GO:0008509	GO:0016020	TRUE	-1.37802	4.65305e-06	4.40907e-05	Chromosome_I	251546	252961	1416	-	9.83308	2454.62	2366.63	2500.32	1475.96	1446.02	1426.68	2169.46	2120.98	2181.65	290.593	361.01	320.498	371.174	391.808	329.363	460.124	455.375	497.444	1113.71	1406.84	1202.97	71.4297	69.0732	73.701	56.1534	52.8026	49.3168	72.9493	65.0894
pgaptmp_000245	pgaptmp_000245	pgaptmp_000245	protein_coding	protein_coding		0.5	1000				TRUE	1.92558	4.71696e-06	4.4616e-05	pgaptmp_000245	1	1000	1000	+	10.5677	565.857	667.129	810.296	682.248	786.504	1067.12	645.195	564.201	487.002	3361.99	4444.6	4814.88	2635.04	2366.38	2873.37	5513.06	3994.52	4277.22	1504.88	1013.08	1090.82	23.3166	27.5709	33.8209	36.7542	40.6673	52.2332	30.7202	24.5172
pgaptmp_003193	pgaptmp_003193	pgaptmp_003193	protein_coding	protein_coding	pgaptmp_003193	0.4903	414				TRUE	1.77429	4.72644e-06	4.46254e-05	Chromosome_I	3460783	3461196	414	+	10.6537	852.641	1047.34	1189.31	1214.59	1148.35	2134.24	1746.26	1306.02	1242.14	1719.34	1834.08	1732.17	1218.1	1248.68	1299.01	5506.32	4025.14	4343.37	1616.08	1242.46	1177.22	84.8641	104.551	119.904	158.05	143.423	252.334	200.836	137.084
pgaptmp_001469	pgaptmp_001469	cobU	protein_coding	protein_coding	pgaptmp_001469	0.51	549	GO:0009236	GO:0000166,GO:0043752		TRUE	1.48356	4.73528e-06	4.46287e-05	Chromosome_I	1520466	1521014	549	+	7.03135	108.7	110.895	113.539	55.7329	83.9757	78.3435	73.5033	86.5705	84.4511	191.71	295.702	257.51	397.687	230.867	255.586	182.027	201.057	227.554	69.2925	60.5299	72.278	8.1586	8.34796	8.63208	5.46895	7.90907	6.98495	6.37481	6.85228
pgaptmp_001838	pgaptmp_001838	pgaptmp_001838	protein_coding	protein_coding	pgaptmp_001838	0.4101	573				TRUE	-1.80272	4.74539e-06	4.4644e-05	Chromosome_I	1969075	1969647	573	-	8.76018	654.513	805.307	870.742	687.373	619.918	739.728	807.794	653.011	729.095	310.773	235.836	227.869	223.883	217.548	233.189	165.173	222.361	183.895	795.187	704.696	564.931	47.0676	58.0829	63.4272	64.6252	55.9402	63.1902	67.1241	49.5226
pgaptmp_002694	pgaptmp_002694	pgaptmp_002694	protein_coding	protein_coding	pgaptmp_002694	0.465	1215	GO:0044571	GO:0030170,GO:0031071		TRUE	2.18019	4.75947e-06	4.46965e-05	Chromosome_I	2916776	2917990	1215	-	13.5344	11659.4	7631.49	8017.19	3467.61	4084.09	2254.64	3364.07	6090.54	5559.7	29828.1	29936.6	31955.3	47698.8	56109.5	52648.1	24477.6	27473	27674.3	4688.98	4944.34	8032.83	395.421	259.582	275.415	153.751	173.805	90.8311	131.832	217.83
pgaptmp_003060	pgaptmp_003060	pgaptmp_003060	protein_coding	protein_coding	pgaptmp_003060	0.4361	477				TRUE	-1.14021	4.86385e-06	4.55244e-05	Chromosome_I	3311344	3311820	477	-	10.885	2773.01	2893.82	2778.86	2165.26	2022.24	1712.84	2574.84	2624.73	2663.73	1457	1322.49	1511.71	1408.11	1883.56	1696.88	1075.31	1105.15	1023.99	2348.68	2335.18	2429.2	239.547	250.724	243.158	244.543	219.209	175.764	257.019	239.113
pgaptmp_003836	pgaptmp_003836	pgaptmp_003836	protein_coding	protein_coding	pgaptmp_003836	0.4586	822	GO:0006355			TRUE	-1.41817	4.86494e-06	4.55244e-05	Chromosome_II	600903	601724	822	-	8.10751	260.572	327.403	304.678	438.176	456.063	348.835	442.505	449.271	456.036	153.368	175.97	164.881	166.439	189.799	160.729	148.318	191.737	158.759	443.136	458.753	482.684	13.0621	16.4609	15.4707	28.7171	28.6878	20.7721	25.6318	23.7506
pgaptmp_004740	pgaptmp_004740	pgaptmp_004740	protein_coding	protein_coding	pgaptmp_004740	0.4305	1050		GO:0016787		TRUE	-1.42035	4.88321e-06	4.56035e-05	Chromosome_II	1656444	1657493	1050	-	7.19106	114.867	152.26	152.747	259.446	205.502	214.414	228.677	182.097	202.683	129.152	134.245	124.124	73.6457	92.1247	111.984	84.2718	83.8849	70.1184	224.642	240.845	217.665	4.50781	5.99292	6.07191	13.3114	10.1197	9.99531	10.3697	7.53616
pgaptmp_002794	pgaptmp_002794	pgaptmp_002794	protein_coding	protein_coding	pgaptmp_002794	0.4366	552				TRUE	1.49623	4.89269e-06	4.56035e-05	Chromosome_I	3027091	3027642	552	-	10.1198	666.848	788.585	909.95	681.608	694.336	630.871	628.119	517.184	582.713	2441.78	2075.36	2289.8	2396.43	2552.85	2533.46	2089.94	1892.07	1674.9	711.365	709.793	565.762	49.779	59.0406	68.8049	66.5211	65.0391	55.9416	54.1796	40.714
pgaptmp_005214	pgaptmp_005214	pgaptmp_005214	protein_coding	protein_coding	pgaptmp_005214	0.4766	1305				TRUE	1.45902	4.8994e-06	4.56035e-05	Chromosome_II	2185680	2186984	1305	+	12.1135	1924.22	1672.22	1858.29	2803.94	3105.74	3177.45	3109.41	3379.98	3330.89	6826.91	7443.34	7647.5	6109.65	6864.96	7881.01	9681.14	9024.95	11607.9	3562.97	3613.96	3867.29	60.758	52.9572	59.4352	115.751	123.055	119.179	113.449	112.549
pgaptmp_002916	pgaptmp_002916	leuD	protein_coding	protein_coding	pgaptmp_002916	0.4478	603	GO:0009098	GO:0003861	GO:0009316	TRUE	1.25066	4.92956e-06	4.57604e-05	Chromosome_I	3174879	3175481	603	+	8.49538	319.162	288.678	336.534	219.088	230.08	230.083	207.888	274.638	283.615	417.727	433.575	429.801	882.275	800.264	799.694	529.227	593.852	517.289	220.73	222.368	232.619	21.8098	19.7851	23.2945	19.5734	19.729	18.6767	16.4152	19.7916
pgaptmp_002212	pgaptmp_002212	cydX	protein_coding	protein_coding	pgaptmp_002212	0.4074	108		GO:0016682		TRUE	1.42149	4.94667e-06	4.57604e-05	Chromosome_I	2393962	2394069	108	-	13.0254	6932.14	6734.65	7278.78	4463.12	4010.35	4403.73	6255.95	7150.28	6797.61	15494.2	13364.6	14950.4	10734.6	10239.2	11310.3	16878	15416.2	14030.3	5856.33	5940.22	5500.6	2644.85	2577.11	2813.04	2226.28	1920.01	1995.86	2758.05	2876.98
pgaptmp_004670	pgaptmp_004670	pgaptmp_004670	protein_coding	protein_coding	pgaptmp_004670	0.4224	909				TRUE	-1.91711	4.95024e-06	4.57604e-05	Chromosome_II	1584619	1585527	909	-	8.38504	227.422	247.313	292.425	698.904	703.211	774.364	438.792	370.164	396.92	314.809	228.579	226.016	178.223	167.6	189.713	241.017	159.781	168.02	863.362	720.625	631.394	10.3093	11.2441	13.4274	41.4207	40.0005	41.6979	22.9841	17.6957
pgaptmp_001211	pgaptmp_001211	nrdA	protein_coding	protein_coding	pgaptmp_001211	0.4586	2283	GO:0006260	GO:0004748,GO:0005524		TRUE	2.5345	4.95106e-06	4.57604e-05	Chromosome_I	1290347	1292629	2283	-	14.0824	13126.5	11271.7	8731.1	7626.44	9321.99	3751.42	5318.22	9604.85	8665.39	23760	22469.7	23978.1	54811.5	68862.7	64644.8	58749.2	56944.5	65457.5	8317.33	8025	15131.9	236.92	204.044	159.626	179.962	211.128	80.4308	110.916	182.819
pgaptmp_004382	pgaptmp_004382	pgaptmp_004382	protein_coding	protein_coding	pgaptmp_004382	0.4512	1188		GO:0008483,GO:0030170		TRUE	-1.23583	4.98216e-06	4.58795e-05	Chromosome_II	1246060	1247247	1188	-	12.4883	6404.83	7356.02	7163.61	10288.8	10341.3	8202.98	12109.5	13972.2	13022.4	3089.56	3103.96	3188.31	3835.47	3438.58	3412.21	3072.55	2987.9	2978.05	6733.66	7498.7	7136.41	222.151	255.899	251.684	466.566	450.093	337.978	485.335	511.076
pgaptmp_001565	pgaptmp_001565	pgaptmp_001565	protein_coding	protein_coding	pgaptmp_001565	0.4088	159				TRUE	-1.27389	4.98321e-06	4.58795e-05	Chromosome_I	1626276	1626434	159	+	9.77792	1305.17	1536.68	1605.89	1373.46	949.677	1057.23	1707.65	1348.56	1498.3	611.455	355.568	485.379	493.426	654.862	519.077	549.452	443.391	514.643	1242.79	1234.17	1211.28	338.243	399.419	421.56	465.355	308.832	325.464	511.37	368.562
pgaptmp_005035	pgaptmp_005035	napH	protein_coding	protein_coding	pgaptmp_005035	0.4807	855				TRUE	-1.46358	4.99012e-06	4.58795e-05	Chromosome_II	1994006	1994860	855	-	7.50214	208.149	244.672	260.569	389.49	391.887	267.193	319.257	404.493	368.066	80.7201	92.5202	96.3347	106.05	136.522	96.1741	82.5863	78.5588	91.2862	216.26	263.783	266.681	10.0315	11.8266	12.7203	24.5411	23.6995	15.2965	17.779	20.5581
pgaptmp_002201	pgaptmp_002201	pgaptmp_002201	protein_coding	protein_coding	pgaptmp_002201	0.4652	417				TRUE	1.31219	5.01528e-06	4.60303e-05	Chromosome_I	2385295	2385711	417	-	9.74758	988.323	925.883	914.034	501.597	591.926	523.665	739.487	844.063	761.468	1011.02	1093.92	1037.45	1095.85	1024.47	1063.19	1451.16	1310.2	1448.67	486.724	597.654	599.824	97.661	91.7617	91.4886	64.8011	73.3965	61.4681	84.436	87.9582
pgaptmp_004053	pgaptmp_004053	pgaptmp_004053	protein_coding	protein_coding	pgaptmp_004053	0.4366	891	GO:0006352,GO:0006355	GO:0003700,GO:0016987		TRUE	-1.59625	5.04076e-06	4.6148e-05	Chromosome_II	822090	822980	891	+	7.37018	200.44	299.24	303.861	269.056	245.783	261.42	275.452	264.189	278.689	139.242	87.0778	100.04	76.5915	107.664	97.4916	77.53	81.2219	62.1805	238.612	267.606	216.003	9.26968	13.8798	14.2344	16.2678	14.2632	14.3613	14.7198	12.8847
pgaptmp_001209	pgaptmp_001209	yfaE	protein_coding	protein_coding	pgaptmp_001209	0.4373	279		GO:0051537		TRUE	1.2731	5.0486e-06	4.6148e-05	Chromosome_I	1288854	1289132	279	-	11.2322	1584.25	1855.29	1692.47	1447.13	1327.23	1575.12	1565.84	1800.82	1611.61	3531.51	2532.51	3438.41	6345.31	5543.02	5107.77	4125.95	4115.68	3613.08	1754.11	1492.22	1653.26	233.979	274.82	253.197	279.427	245.971	276.338	267.225	280.481
pgaptmp_000244	pgaptmp_000244	pgaptmp_000244	protein_coding	protein_coding		0.5	1000				TRUE	2.05863	5.0553e-06	4.6148e-05	pgaptmp_000244	1	1000	1000	+	10.7008	602.862	678.57	831.534	689.935	791.966	1225.46	625.149	575.396	534.857	4300.37	4297.65	5917.18	3568.87	2942.44	3372.68	6134.99	4810.73	4770.7	1644.58	1051.95	1053.43	24.8414	28.0438	34.7073	37.1683	40.9497	59.9834	29.7657	25.0037
pgaptmp_002026	pgaptmp_002026	pgaptmp_002026	protein_coding	protein_coding	pgaptmp_002026	0.4439	579		GO:0004797,GO:0005524		TRUE	1.39278	5.06423e-06	4.6148e-05	Chromosome_I	2192174	2192752	579	-	10.731	874.997	945.246	822.549	1351.68	1382.53	1194.94	633.316	638.085	696.018	3174.32	2782.86	3040.1	3679.34	3518.5	3551.86	3994.48	3923.95	3057.43	1371.88	1312.54	1488.76	62.2711	67.4695	59.2958	125.765	123.464	101.019	52.0804	47.8892
pgaptmp_004750	pgaptmp_004750	pgaptmp_004750	protein_coding	protein_coding	pgaptmp_004750	0.4278	561				TRUE	-1.49874	5.07343e-06	4.6148e-05	Chromosome_II	1669136	1669696	561	-	8.60049	387.003	558.874	554.628	653.421	662.93	893.116	899.116	645.548	730.502	254.268	179.598	218.606	240.085	189.799	188.396	188.769	190.405	203.74	612.456	608.485	476.869	28.4256	41.1711	41.2648	62.7472	61.1011	77.9252	76.3107	50.0038
pgaptmp_004620	pgaptmp_004620	csm6	protein_coding	protein_coding	pgaptmp_004620	0.4604	1125	GO:0043571	GO:0003674		TRUE	1.38884	5.08076e-06	4.6148e-05	Chromosome_II	1524993	1526117	1125	-	8.62058	343.832	287.798	294.876	307.492	314.056	182.252	317.029	382.104	409.588	526.699	469.857	444.622	484.589	823.573	654.775	645.522	656.432	660.172	212.348	235.748	288.281	12.5936	10.5725	10.9403	14.7247	14.4344	7.92961	13.4177	14.7593
pgaptmp_004769	pgaptmp_004769	pgaptmp_004769	protein_coding	protein_coding	pgaptmp_004769	0.4522	984				TRUE	-1.73464	5.11184e-06	4.63503e-05	Chromosome_II	1694876	1695859	984	+	11.0062	1885.68	2209.97	2440.69	3519.5	3461.44	4129.12	5651.59	5665.15	5402.06	1533.68	1369.66	948.527	1168.02	1214.27	861.615	1038.23	953.358	669.432	3148.9	3045.61	2722.47	78.9642	92.8183	103.528	192.686	181.889	205.397	273.469	250.181
pgaptmp_004995	pgaptmp_004995	pgaptmp_004995	protein_coding	protein_coding	pgaptmp_004995	0.4286	630	GO:0000160			TRUE	-1.63901	5.1398e-06	4.64513e-05	Chromosome_II	1948045	1948674	630	+	8.76118	658.368	594.079	634.678	669.436	713.452	534.385	646.68	844.063	826.214	298.665	297.516	246.395	237.139	273.044	225.285	185.398	226.356	209.032	530.311	732.731	737.734	43.0612	38.9713	42.0488	57.2444	58.5556	41.519	48.8744	58.2199
pgaptmp_002678	pgaptmp_002678	pgaptmp_002678	protein_coding	protein_coding	pgaptmp_002678	0.4552	870				TRUE	1.20056	5.14065e-06	4.64513e-05	Chromosome_I	2901198	2902067	870	-	9.87108	630.615	662.728	664.083	586.157	741.444	676.228	565.01	567.933	598.196	1095.78	1277.14	1259.76	1565.71	1321.93	1425.49	1832.07	1873.43	1779.42	716.395	831.49	829.951	29.8678	31.4817	31.8599	36.296	44.0659	38.0458	30.9221	28.3671
pgaptmp_003069	pgaptmp_003069	pyrE	protein_coding	protein_coding	pgaptmp_003069	0.4673	642	GO:0009220	GO:0004588		TRUE	1.22638	5.15161e-06	4.64705e-05	Chromosome_I	3319989	3320630	642	-	10.2545	708.478	741.939	722.078	1130.03	1056.18	1232.88	830.81	775.403	722.057	1267.31	1454.93	1561.73	1639.35	1264.22	1488.72	2952.88	2571.14	2517.65	1198.65	1078.71	1149.8	45.4726	47.7611	46.9451	94.8245	85.0644	93.998	61.6168	52.4844
pgaptmp_003257	pgaptmp_003257	rsmG	protein_coding	protein_coding	pgaptmp_003257	0.4465	636	GO:0031167,GO:0046118	GO:0008168	GO:0005575	TRUE	1.58533	5.16349e-06	4.64979e-05	Chromosome_I	3524590	3525225	636	-	11.9469	3658.8	2978.32	2790.29	1648.29	2223.65	1725.21	1820.51	2590.4	2450.49	6615.02	6679.6	7877.22	10098.3	8748.52	8996.89	6885	7737.38	7269.82	2093.3	2217.94	3004.11	237.05	193.533	183.119	139.617	180.781	132.775	136.291	176.989
pgaptmp_000779	pgaptmp_000779	pgaptmp_000779	protein_coding	protein_coding	pgaptmp_000779	0.4689	546				TRUE	-1.48906	5.17477e-06	4.65198e-05	Chromosome_I	824917	825462	546	-	11.4259	4663.31	4516.76	4007.37	3308.1	3229.31	1931.37	3118.32	3994.93	3822.82	2669.82	2244.07	2269.42	2249.14	2815.91	2637.54	1110.7	1320.85	1358.71	3090.78	3497.99	4152.25	351.933	341.882	306.343	326.4	305.817	173.144	271.932	317.947
pgaptmp_002832	pgaptmp_002832	pgaptmp_002832	protein_coding	protein_coding	pgaptmp_002832	0.4389	786				TRUE	1.45818	5.20949e-06	4.67478e-05	Chromosome_I	3078753	3079538	786	-	13.7426	10942.5	10999.7	12028.7	8466.28	9429.18	10021.4	10336.5	10686.2	10393.8	20848	21609.8	23729.8	17346.5	16431.5	17343	27582.2	22873.9	23416.9	9145.49	8699.11	9070.47	573.656	578.362	638.756	580.276	620.29	624.076	626.157	590.799
pgaptmp_000894	pgaptmp_000894	fliG	protein_coding	protein_coding	pgaptmp_000894	0.4981	1056	GO:0006935,GO:0071973	GO:0003774	GO:0009288	TRUE	1.68599	5.2179e-06	4.67478e-05	Chromosome_I	941991	943046	1056	+	10.3638	1397.68	1036.78	1137.03	588.719	718.231	562.424	612.527	765.702	721.353	2350.97	2704.86	2595.48	2794.12	2745.98	2819.35	2300.62	2439.32	2747.85	658.278	681.758	982.814	54.5385	40.5755	44.9416	30.0337	35.1677	26.0695	27.6181	31.5089
pgaptmp_001756	pgaptmp_001756	pgaptmp_001756	protein_coding	protein_coding	pgaptmp_001756	0.4865	1371	GO:0006855	GO:0042910	GO:0016020	TRUE	1.26847	5.25217e-06	4.69748e-05	Chromosome_I	1851994	1853364	1371	+	10.879	1453.96	1755.83	1868.91	1320.93	1686.34	1901.69	1455.96	1347.81	1292.1	2334.83	2864.5	2619.56	2471.55	1935.73	2310.81	3310.2	3106.4	2803.41	1174.62	1371.16	1271.93	43.6992	52.9282	56.8973	51.9049	63.5993	67.8944	50.5643	42.7199
pgaptmp_002842	pgaptmp_002842	rsmH	protein_coding	protein_coding	pgaptmp_002842	0.4553	951		GO:0016434		TRUE	1.21276	5.2632e-06	4.69935e-05	Chromosome_I	3090944	3091894	951	-	11.8121	2811.56	2759.17	2866.26	2157.57	2568.43	2504.52	2381.06	2626.97	2497.64	5109.58	6209.74	5987.57	5355.51	4415.33	5076.15	6504.1	6058.35	5829.09	2651.55	2496.38	2791.43	121.822	119.905	125.799	122.222	139.647	128.907	119.213	120.036
pgaptmp_005208	pgaptmp_005208	pgaptmp_005208	protein_coding	protein_coding	pgaptmp_005208	0.4709	894	GO:0006355	GO:0003677,GO:0003700		TRUE	-1.32996	5.33041e-06	4.7513e-05	Chromosome_II	2178887	2179780	894	+	8.1933	337.664	296.599	317.747	444.582	393.252	266.368	466.263	494.049	519.375	189.692	217.695	192.669	141.4	195.349	225.285	170.229	181.085	198.448	440.342	464.488	525.054	15.5634	13.7112	14.8349	26.7904	22.7446	14.584	24.8328	24.0143
pgaptmp_003946	pgaptmp_003946	pgaptmp_003946	protein_coding	protein_coding	pgaptmp_003946	0.4283	1653	GO:0009244,GO:1900727	GO:0008484,GO:0016776	GO:0005886	TRUE	-1.2323	5.39418e-06	4.8e-05	Chromosome_II	714500	716152	1653	-	9.1181	476.43	565.915	606.905	813.573	753.733	842.811	905.055	680.624	793.137	452.033	448.088	418.686	309.312	336.311	284.57	412.932	360.838	366.468	946.624	902.852	868.167	11.8764	14.1488	15.3246	26.5148	23.577	24.9569	26.0696	17.8925
pgaptmp_000526	pgaptmp_000526	epd	protein_coding	protein_coding	pgaptmp_000526	0.4499	1038	GO:0042823	GO:0048001,GO:0051287		TRUE	-1.74287	5.40846e-06	4.80458e-05	Chromosome_I	534992	536029	1038	+	13.6505	26185.9	26331.3	22639.3	19829.4	17629.4	11354	17531.6	20466.5	20323.2	6873.32	6929.94	7176.94	5772.35	7447.67	6887.65	7673.79	6593.62	6751.21	19470.1	22264.2	28970.2	1039.51	1048.38	910.346	1029.14	878.183	535.409	804.189	856.807
pgaptmp_005291	pgaptmp_005291	pgaptmp_005291	protein_coding	protein_coding	pgaptmp_005291	0.4378	651				TRUE	-1.55712	5.42215e-06	4.80861e-05	Chromosome_II	2278615	2279265	651	+	7.88001	292.18	286.918	280.173	367.709	329.758	283.686	391.275	448.525	434.22	143.278	132.431	146.355	145.818	143.182	122.523	131.464	146.466	111.131	346.462	444.099	409.575	18.4938	18.2146	17.9633	30.429	26.1914	21.3299	28.6176	29.9394
pgaptmp_002072	pgaptmp_002072	cysB	protein_coding	protein_coding	pgaptmp_002072	0.4738	975	GO:0006355	GO:0003700		TRUE	-1.42306	5.45146e-06	4.8149e-05	Chromosome_I	2238980	2239954	975	-	12.5739	9388.3	10074.7	10500.4	8899.97	8653.6	7225.75	10883.7	12333.3	11769	3317.6	3236.39	3536.6	4502.7	4498.57	4503.06	2754	2575.13	3200.31	7028.16	8265.84	7681.41	396.771	427.04	449.511	491.755	458.919	362.753	531.501	549.684
pgaptmp_000033	pgaptmp_000033	pgaptmp_000033	protein_coding	protein_coding	pgaptmp_000033	0.4832	774				TRUE	1.80244	5.45879e-06	4.8149e-05	Chromosome_I	36817	37590	774	+	6.49747	114.867	75.6901	73.5148	58.936	59.3975	50.3048	25.986	55.226	57.7083	98.8822	119.732	107.45	169.385	190.909	193.666	178.656	225.024	213.001	48.6165	42.6895	68.1241	6.11525	4.04147	3.96437	4.10208	3.96799	3.18127	1.59857	3.10056
pgaptmp_002103	pgaptmp_002103	pgaptmp_002103	protein_coding	protein_coding	pgaptmp_002103	0.4744	957	GO:0055085			TRUE	-1.31591	5.46187e-06	4.8149e-05	Chromosome_I	2282560	2283516	957	+	8.32128	561.232	599.36	622.425	458.035	435.581	444.496	714.986	671.668	682.647	149.332	134.245	170.438	154.656	144.292	177.856	180.342	170.433	168.02	414.078	490.611	428.683	24.1651	25.8832	27.1466	25.784	23.5343	22.7347	35.5728	30.4986
pgaptmp_003098	pgaptmp_003098	greB	protein_coding	protein_coding	pgaptmp_003098	0.4547	486	GO:0032784	GO:0003677,GO:0070063		TRUE	-2.1573	5.47209e-06	4.8149e-05	Chromosome_I	3354213	3354698	486	+	8.46825	434.03	521.909	613.44	568.86	416.465	611.079	635.543	455.988	568.638	215.926	223.137	263.068	310.785	247.516	279.3	80.9009	149.129	142.883	538.693	557.513	679.579	36.7994	44.3813	52.6838	63.0571	44.3084	61.5452	62.2647	40.7713
pgaptmp_000401	pgaptmp_000401	rapA	protein_coding	protein_coding	pgaptmp_000401	0.4918	2910	GO:0006355	GO:0005524,GO:0016817,GO:0140658		TRUE	1.77199	5.48268e-06	4.8149e-05	Chromosome_I	437772	440681	2910	+	11.7514	2655.83	1994.34	2000.42	1062.13	1400.96	1109.18	1057.26	1626.18	1542.64	8485.7	8680.57	9868.75	15729.2	14847.6	15046.6	5929.36	7140.87	6125.44	1741.25	1507.51	2385.17	37.6067	28.3236	28.6925	19.6629	24.893	18.657	17.299	24.2836
pgaptmp_003003	pgaptmp_003003	hslV	protein_coding	protein_coding	pgaptmp_003003	0.4928	552	GO:0051603	GO:0004298	GO:0009376	TRUE	2.04732	5.48417e-06	4.8149e-05	Chromosome_I	3250879	3251430	552	+	12.2849	4225.43	3717.61	3099.06	2573.32	2814.21	1368.13	2337.26	3612.83	3228.85	7125.57	5935.81	6943.51	14808.7	16795.6	17266.6	10210.4	10628.1	13117.4	2094.98	2572.2	3579.01	315.42	278.334	234.332	251.142	263.61	121.316	201.604	284.411
pgaptmp_002438	pgaptmp_002438	pgaptmp_002438	protein_coding	protein_coding	pgaptmp_002438	0.4323	768				TRUE	-1.1852	5.56361e-06	4.8765e-05	Chromosome_I	2654625	2655392	768	+	10.7864	2815.41	2409.76	2797.65	2585.5	2289.87	1415.13	1856.89	1975.45	2024.01	1313.72	1335.19	1200.48	883.748	1551.69	1314.82	1110.7	1217	1242.29	2677.82	2602.15	2901.09	151.056	129.674	152.045	181.362	154.168	90.1921	115.122	111.774
pgaptmp_004127	pgaptmp_004127	pgaptmp_004127	protein_coding	protein_coding	pgaptmp_004127	0.4753	1233	GO:0055085	GO:0022857		TRUE	-1.27026	5.58756e-06	4.88466e-05	Chromosome_II	941095	942327	1233	-	10.1492	622.135	656.567	575.866	1379.23	1648.11	2008.89	1112.2	981.382	995.82	1993.79	1975.58	2202.73	1172.44	1279.76	1501.9	588.217	605.835	583.438	1616.08	1361.61	1355	20.7912	22.0068	19.4939	60.2612	69.1141	79.7492	42.949	34.587
pgaptmp_001484	pgaptmp_001484	pgaptmp_001484	protein_coding	protein_coding	pgaptmp_001484	0.4598	870	GO:0006355	GO:0003677,GO:0003700		TRUE	-2.03615	5.59149e-06	4.88466e-05	Chromosome_I	1534252	1535121	870	+	8.44052	1292.84	1394.11	1600.99	778.98	643.131	832.915	1868.77	1482.89	1531.38	54.4861	54.4236	42.6096	69.2269	54.3869	57.968	123.037	163.775	205.063	610.78	837.862	664.625	61.2326	66.2244	76.8086	48.236	38.2229	46.8613	102.275	74.0676
pgaptmp_002425	pgaptmp_002425	sucD	protein_coding	protein_coding	pgaptmp_002425	0.457	873		GO:0003824		TRUE	1.60005	5.65224e-06	4.92954e-05	Chromosome_I	2638694	2639566	873	-	10.0006	975.988	842.272	844.603	559.251	608.995	585.515	590.254	747.79	693.907	1426.73	1404.13	1493.19	1981.07	2082.24	1924.8	1714.09	1730.96	2268.93	534.781	625.051	716.134	46.0669	39.8731	40.3812	34.511	36.0697	32.8289	32.1927	37.2223
pgaptmp_004851	pgaptmp_004851	pgaptmp_004851	protein_coding	protein_coding	pgaptmp_004851	0.4535	699	GO:0015031		GO:0005886	TRUE	-1.6818	5.66573e-06	4.93313e-05	Chromosome_II	1775315	1776013	699	+	8.42875	262.885	238.512	306.312	479.175	591.244	477.483	364.547	470.168	363.14	332.971	350.125	277.889	190.006	218.657	198.936	257.872	195.731	214.324	667.219	630.149	912.198	15.497	14.1018	18.2906	36.9302	43.7354	33.4359	24.8318	29.2289
pgaptmp_002080	pgaptmp_002080	pgaptmp_002080	protein_coding	protein_coding	pgaptmp_002080	0.4781	960				TRUE	1.65939	5.68391e-06	4.94078e-05	Chromosome_I	2250468	2251427	960	+	6.63506	92.5107	62.4883	85.7672	73.67	79.8793	65.9735	69.0485	55.9723	54.8932	98.8822	168.713	125.976	134.035	136.522	123.841	227.534	247.66	218.293	55.3222	82.1933	63.9702	3.97081	2.6901	3.72899	4.13412	4.30236	3.36381	3.42465	2.53361
pgaptmp_001028	pgaptmp_001028	rsxB	protein_coding	protein_coding	pgaptmp_001028	0.4848	594	GO:0022900	GO:0009055,GO:0051536		TRUE	1.23235	5.70986e-06	4.95514e-05	Chromosome_I	1089245	1089838	594	-	10.9264	1628.96	1595.65	1590.37	1237.66	1267.15	1289.78	1124.82	1348.56	1339.25	3164.23	3347.05	3505.1	2973.81	2865.86	3225.13	2957.94	3146.35	3192.37	1176.3	1381.99	1395.71	113.001	111.018	111.751	112.248	110.302	106.283	90.1634	98.6555
pgaptmp_004735	pgaptmp_004735	pgaptmp_004735	protein_coding	protein_coding	pgaptmp_004735	0.442	1371				TRUE	-1.48687	5.74456e-06	4.97704e-05	Chromosome_II	1651872	1653242	1371	-	9.27054	164.977	168.102	179.703	982.694	923.05	771.065	853.826	1008.99	1024.67	607.419	789.143	1007.81	518.466	456.184	612.616	397.763	438.065	505.382	1327.17	1078.71	1420.64	4.95844	5.06731	5.47089	38.614	34.8122	27.5287	29.6527	31.9808
pgaptmp_003932	pgaptmp_003932	pgaptmp_003932	protein_coding	protein_coding	pgaptmp_003932	0.4372	1107		GO:0016746		TRUE	-1.28666	5.76481e-06	4.98637e-05	Chromosome_II	702720	703826	1107	+	11.2303	2440.74	2735.4	2423.54	4115.91	3854.01	3806.67	3306.16	3108.33	3285.85	1091.74	1122.94	1198.63	1325.62	1148.78	1385.96	2201.18	1772.23	2053.28	4980.68	4606.01	5189.06	90.8516	102.121	91.3783	200.301	180.015	168.318	142.203	122.016
pgaptmp_002050	pgaptmp_002050	pgaptmp_002050	protein_coding	protein_coding	pgaptmp_002050	0.4606	1257				TRUE	2.77725	5.8521e-06	5.05356e-05	Chromosome_I	2215480	2216736	1257	-	9.04516	457.157	301.88	414.133	206.917	241.003	195.446	256.148	341.058	303.32	649.797	1505.72	922.59	1844.09	1153.22	1396.5	974.182	2222.28	1545.25	219.054	262.509	188.587	14.9861	9.92524	13.7514	8.86797	9.91361	7.61071	9.7026	11.7905
pgaptmp_005044	pgaptmp_005044	pgaptmp_005044	protein_coding	protein_coding	pgaptmp_005044	0.4478	498				TRUE	-2.05516	5.86443e-06	5.05591e-05	Chromosome_II	2005371	2005868	498	+	8.18556	186.563	183.064	169.901	638.046	558.473	560.775	279.164	253.741	274.466	258.304	330.17	203.785	92.7936	174.26	165.999	256.186	179.753	170.666	1086.89	697.687	815.827	15.4367	15.192	14.2399	69.0219	57.9851	55.1178	26.6909	22.1411
pgaptmp_005074	pgaptmp_005074	pncB	protein_coding	protein_coding	pgaptmp_005074	0.4485	1311	GO:0009435	GO:0004516		TRUE	1.21107	5.96951e-06	5.13018e-05	Chromosome_II	2035199	2036509	1311	-	11.5703	2820.04	3415.73	3353.91	1630.99	1712.97	2204.34	2313.5	2400.84	2187.99	3751.47	4406.5	4579.6	4275.87	3066.75	3670.43	5154.06	5375.29	5044.56	2213.45	2381.06	2128.46	88.636	107.677	106.78	67.0213	67.5601	82.3016	84.0232	79.5789
pgaptmp_003832	pgaptmp_003832	pgaptmp_003832	protein_coding	protein_coding	pgaptmp_003832	0.4501	882				TRUE	-1.32361	5.97009e-06	5.13018e-05	Chromosome_II	597744	598625	882	-	8.31786	354.624	366.129	374.109	559.251	602.85	418.932	506.356	450.018	541.191	159.422	224.951	194.522	198.843	221.987	205.523	197.196	187.742	168.02	423.019	496.983	507.607	16.5676	17.1556	17.7039	34.1588	35.3415	23.2492	27.3351	22.1717
pgaptmp_003964	pgaptmp_003964	pgaptmp_003964	protein_coding	protein_coding	pgaptmp_003964	0.4595	618				TRUE	-1.63036	6.02534e-06	5.16881e-05	Chromosome_II	730370	730987	618	-	7.41964	209.691	258.754	284.257	292.118	225.301	320.796	448.444	338.819	381.438	102.918	68.9366	74.1036	61.8624	86.575	94.8567	96.0698	82.5534	78.0564	315.728	299.464	233.45	13.9814	17.3038	19.1983	25.4644	18.8503	25.4082	34.5504	23.8241
pgaptmp_002253	pgaptmp_002253	pgaptmp_002253	protein_coding	protein_coding	pgaptmp_002253	0.4294	666				TRUE	1.43227	6.03471e-06	5.16881e-05	Chromosome_I	2442458	2443123	666	-	11.4691	1552.64	2034.83	1986.53	1889.15	1814.01	2653.78	2127.14	1559.02	1713.65	3539.58	4437.34	3947.87	3305.22	3370.88	3205.37	6955.79	6814.65	6269.65	2884.58	2242.79	2290.46	96.0626	126.269	124.498	152.812	140.835	195.04	152.074	101.722
pgaptmp_001007	pgaptmp_001007	pgaptmp_001007	protein_coding	protein_coding	pgaptmp_001007	0.4467	1164				TRUE	-1.13533	6.07189e-06	5.19221e-05	Chromosome_I	1065840	1067003	1164	+	9.85224	1440.08	1498.84	1470.3	1108.25	1040.48	886.519	945.148	1018.7	981.041	857.652	763.745	824.403	706.999	834.672	815.504	534.283	511.298	535.811	1194.74	1178.1	1139.83	50.9792	53.2162	52.7221	51.2921	46.2194	37.2793	38.6616	38.0303
pgaptmp_001755	pgaptmp_001755	pgaptmp_001755	protein_coding	protein_coding	pgaptmp_001755	0.4493	612				TRUE	-1.31731	6.08443e-06	5.19277e-05	Chromosome_I	1851101	1851712	612	-	10.3215	1917.28	2487.21	2511.75	1969.87	1675.42	2591.93	2418.93	1941.87	2053.57	807.201	903.433	842.929	801.265	709.249	623.156	573.048	701.704	554.332	1587.02	1506.24	1517.01	129.09	167.959	171.304	173.401	141.552	207.303	188.193	137.881
pgaptmp_002043	pgaptmp_002043	pgaptmp_002043	protein_coding	protein_coding	pgaptmp_002043	0.4296	270				TRUE	-1.25727	6.09229e-06	5.19277e-05	Chromosome_I	2209962	2210231	270	-	9.61793	1107.05	1208.4	1302.85	839.838	1017.27	827.143	1139.67	1076.91	1036.64	516.609	634.943	596.534	542.032	623.784	611.299	463.495	466.027	379.698	1056.15	1023.91	1093.31	168.951	184.965	201.405	167.57	194.812	149.951	200.978	173.321
pgaptmp_003951	pgaptmp_003951	pgaptmp_003951	protein_coding	protein_coding	pgaptmp_003951	0.4449	1605				TRUE	-1.35855	6.19481e-06	5.27161e-05	Chromosome_II	719400	721004	1605	-	8.39975	350.77	366.129	407.599	516.331	462.891	448.62	565.752	541.066	527.82	201.8	221.323	281.594	194.425	257.505	248.999	173.6	197.063	195.802	528.076	520.558	449.453	9.00545	9.42758	10.5998	17.3307	14.9124	13.6816	16.7836	14.6492
pgaptmp_003646	pgaptmp_003646	pgaptmp_003646	protein_coding	protein_coding	pgaptmp_003646	0.4595	1086				TRUE	-1.12895	6.21755e-06	5.28241e-05	Chromosome_II	402313	403398	1086	-	9.21094	457.928	492.865	489.282	1163.99	1080.76	907.96	964.452	1020.94	1069.01	256.286	272.118	277.889	313.731	388.478	429.49	480.349	464.696	472.307	1014.24	1080.62	1043.46	17.375	18.756	18.8049	57.7407	51.4569	40.9232	42.2847	40.8513
pgaptmp_005310	pgaptmp_005310	pgaptmp_005310	protein_coding	protein_coding	pgaptmp_005310	0.4221	462				TRUE	-1.19301	6.32028e-06	5.36103e-05	Chromosome_II	2296581	2297042	462	+	8.08604	194.273	207.708	186.237	374.756	359.798	388.419	409.094	361.208	360.325	238.124	235.836	200.08	194.425	269.715	223.967	178.656	183.748	175.958	431.401	423.072	413.729	17.3272	18.5803	16.8254	43.6989	40.2681	41.152	42.1613	33.9745
pgaptmp_000912	pgaptmp_000912	cheY	protein_coding	protein_coding	pgaptmp_000912	0.4309	369	GO:0000160			TRUE	1.38811	6.33495e-06	5.36114e-05	Chromosome_I	959601	959969	369	+	12.9824	7736.98	8713.16	8660.86	5117.18	6073.56	6130.59	7717.84	8040.61	7346.55	8560.37	11164.1	11324.9	9095.24	7462.1	8114.2	14380.1	12673.3	14455	5706.57	5213.86	4943.98	863.979	975.867	979.66	747.083	851.061	813.221	995.869	946.892
pgaptmp_005156	pgaptmp_005156	pgaptmp_005156	protein_coding	protein_coding	pgaptmp_005156	0.4488	459		GO:0008080,GO:0016746		TRUE	-1.28888	6.3408e-06	5.36114e-05	Chromosome_II	2123413	2123871	459	-	8.99238	531.166	638.965	762.92	1003.83	893.01	853.532	1158.98	1072.43	1114.76	199.782	304.772	300.12	269.543	189.799	148.872	348.885	336.871	285.766	759.982	858.888	796.719	47.6843	57.5315	69.3757	117.818	100.598	91.0206	120.225	101.53
pgaptmp_002611	pgaptmp_002611	crl	protein_coding	protein_coding	pgaptmp_002611	0.4385	390	GO:0045893			TRUE	-1.56067	6.38673e-06	5.38958e-05	Chromosome_I	2819467	2819856	390	-	9.64837	1591.96	1296.41	1312.65	1101.21	1255.54	852.707	1152.29	1167.96	1408.22	500.465	575.077	500.2	499.318	596.036	520.394	350.571	391.463	378.375	878.45	1186.39	1309.31	168.199	137.379	140.483	152.114	166.46	107.021	140.68	130.137
pgaptmp_003825	pgaptmp_003825	pgaptmp_003825	protein_coding	protein_coding	pgaptmp_003825	0.4471	255				TRUE	-1.64184	6.39494e-06	5.38958e-05	Chromosome_II	589289	589543	255	-	8.81396	346.144	394.292	417.401	777.058	724.376	848.584	607.33	424.643	529.931	312.791	293.888	316.793	167.912	269.715	333.316	347.2	299.589	300.319	1197.53	1000.97	810.843	55.9339	63.9028	68.3209	164.164	146.882	162.887	113.401	72.3639
pgaptmp_000148	pgaptmp_000148	rplL	protein_coding	protein_coding	pgaptmp_000148	0.4688	369	GO:0006412	GO:0003735	GO:0005840	TRUE	2.05116	6.41309e-06	5.39623e-05	Chromosome_I	149227	149595	369	+	17.8336	150951	169008	171207	101226	133585	160764	151564	144865	138862	399551	613311	514289	324973	265085	297909	708576	541876	524420	156029	137221	135245	16856.6	18928.8	19365.8	14778.5	18718.7	21325.3	19557.1	17059.8
pgaptmp_004348	pgaptmp_004348	pgaptmp_004348	protein_coding	protein_coding	pgaptmp_004348	0.4403	888		GO:0001216		TRUE	-1.34154	6.65428e-06	5.59023e-05	Chromosome_II	1211129	1212016	888	+	9.79315	1323.67	1424.03	1686.76	1436.89	1206.38	1242.78	1461.16	1296.32	1566.57	494.411	502.512	463.148	524.357	518.34	453.204	475.293	548.58	489.506	1112.59	1404.93	1372.45	61.4223	66.2747	79.283	87.1712	70.2451	68.5035	78.3459	63.4361
pgaptmp_002946	pgaptmp_002946	pgaptmp_002946	protein_coding	protein_coding	pgaptmp_002946	0.4339	348				TRUE	-1.16747	6.72477e-06	5.64044e-05	Chromosome_I	3204796	3205143	348	-	9.59702	1140.19	1225.12	1209.73	878.915	884.817	815.597	1013.45	1097.06	1062.68	494.411	517.025	615.06	679.013	664.852	619.203	423.044	440.728	445.847	967.859	1051.95	962.045	135.008	145.493	145.094	136.06	131.467	114.717	138.662	136.99
pgaptmp_000117	pgaptmp_000117	pgaptmp_000117	protein_coding	protein_coding	pgaptmp_000117	0.4488	1854				TRUE	1.69456	6.77268e-06	5.67158e-05	Chromosome_I	122865	124718	1854	+	11.5608	2066.07	2008.43	2093.54	1939.12	2074.81	1586.66	1796	1882.91	1903.67	4221.66	4350.26	4957.53	5638.31	5193.39	5711.16	5664.75	6801.33	7182.51	1652.96	1931.22	2502.31	45.9192	44.7701	47.1316	56.3456	57.8647	41.8897	46.1244	44.1324
pgaptmp_002707	pgaptmp_002707	aceA	protein_coding	protein_coding	pgaptmp_002707	0.4886	1314	GO:0019752	GO:0004451		TRUE	-1.60703	6.82569e-06	5.70688e-05	Chromosome_I	2929708	2931021	1314	-	9.58466	1481.71	1902.81	1739.03	1153.1	1108.75	1345.86	1735.87	1483.64	1476.49	359.205	353.754	331.614	405.051	443.975	383.379	358.998	326.219	320.163	1193.62	1101.01	819.981	46.4651	59.847	55.24	47.2753	43.6298	50.1345	62.9004	49.0649
pgaptmp_000551	pgaptmp_000551	pgaptmp_000551	protein_coding	protein_coding	pgaptmp_000551	0.5011	471				TRUE	1.25656	6.90309e-06	5.76243e-05	Chromosome_I	557397	557867	471	+	10.8854	1433.15	1615.01	1408.22	1227.41	1478.11	1361.53	1220.6	1380.65	1216.1	2314.65	2746.58	2699.23	2355.19	2494.03	2727.13	3731.55	3095.75	3796.98	1523.32	1380.08	1538.61	125.38	141.709	124.793	140.389	162.267	141.494	123.391	127.38
pgaptmp_002883	pgaptmp_002883	tsaD	protein_coding	protein_coding	pgaptmp_002883	0.4916	1017	GO:0002949			TRUE	1.40358	6.94432e-06	5.78766e-05	Chromosome_I	3134899	3135915	1017	-	11.7342	2271.14	2261.02	2220.15	2027.53	2491.28	2206.81	1923.71	2059.04	2141.54	5258.92	6285.93	5919.03	6502.91	4509.67	5215.8	6637.25	6834.62	6540.86	2069.83	2701.55	2802.23	92.0197	91.8809	91.1174	107.401	126.662	106.213	90.0639	87.9793
pgaptmp_002220	pgaptmp_002220	pgaptmp_002220	protein_coding	protein_coding	pgaptmp_002220	0.481	867				TRUE	-1.44219	7.00442e-06	5.82852e-05	Chromosome_I	2403250	2404116	867	+	9.0147	782.487	915.322	785.791	724.528	610.36	421.406	575.404	604.501	643.236	391.493	351.94	296.415	415.362	717.019	573.092	207.309	278.285	276.505	692.366	679.847	756.842	37.1891	43.6311	37.8294	45.0195	36.4008	23.7911	31.6	30.2981
pgaptmp_004903	pgaptmp_004903	pgaptmp_004903	protein_coding	protein_coding	pgaptmp_004903	0.4771	2157	GO:0006508	GO:0008236		TRUE	1.20054	7.08369e-06	5.88517e-05	Chromosome_II	1838140	1840296	2157	-	9.14935	422.466	462.941	437.821	396.537	363.895	472.535	569.465	530.618	527.82	700.247	711.136	709.542	815.994	793.604	777.298	962.384	840.18	877.142	354.286	377.834	422.037	8.07048	8.86988	8.47203	9.9037	8.72307	10.723	12.5704	10.6898
pgaptmp_002034	pgaptmp_002034	hisA	protein_coding	protein_coding	pgaptmp_002034	0.477	738	GO:0000105	GO:0003949		TRUE	1.85999	7.0972e-06	5.88709e-05	Chromosome_I	2199348	2200085	738	-	7.98038	335.351	172.503	187.871	106.982	137.229	97.3109	96.5194	184.336	201.275	443.961	451.716	403.865	531.722	687.051	631.06	503.945	503.309	473.63	105.056	108.317	178.618	18.7241	9.6601	10.6254	7.80939	9.61462	6.45413	6.22718	10.854
pgaptmp_002223	pgaptmp_002223	pgaptmp_002223	protein_coding	protein_coding	pgaptmp_002223	0.4297	747				TRUE	-1.13266	7.12215e-06	5.89849e-05	Chromosome_I	2406337	2407083	747	+	11.3847	3984.9	4619.73	4468.06	2835.33	3067.5	2930.87	3707.09	3484.46	3625.77	2082.58	2113.45	2023.03	1727.73	1878.01	2015.7	1670.27	1476.64	1574.36	3581.41	3345.08	3477.65	219.814	255.587	249.655	204.479	212.329	192.048	236.29	202.7
pgaptmp_004766	pgaptmp_004766	pgaptmp_004766	protein_coding	protein_coding	pgaptmp_004766	0.4613	1563	GO:0007165		GO:0016020	TRUE	1.44726	7.14452e-06	5.90771e-05	Chromosome_II	1690222	1691784	1563	-	9.71859	556.606	490.225	472.945	610.5	724.376	517.892	573.177	699.281	665.756	1317.76	1355.15	1324.6	1026.62	1139.9	924.853	1784.88	1499.28	1950.09	580.604	581.725	748.534	14.674	12.9622	12.6297	21.0422	23.9634	16.2186	17.4607	19.4415
pgaptmp_000014	pgaptmp_000014	pgaptmp_000014	protein_coding	protein_coding	pgaptmp_000014	0.4777	942		GO:0003677,GO:0003700		TRUE	-1.68216	7.20644e-06	5.94955e-05	Chromosome_I	16265	17206	942	+	10.4647	2980.39	2979.2	2997.77	1893	2070.72	1413.48	3317.3	3602.38	3430.12	609.437	600.474	596.534	614.205	620.454	598.124	692.714	687.057	792.47	1759.69	2715.56	2581.24	130.371	130.704	132.828	108.259	113.662	73.4467	167.674	166.179
pgaptmp_004850	pgaptmp_004850	pgaptmp_004850	protein_coding	protein_coding	pgaptmp_004850	0.4622	753	GO:0006810	GO:0015291		TRUE	-2.30303	7.28539e-06	5.9972e-05	Chromosome_II	1774563	1775315	753	+	7.9193	269.052	238.512	240.148	465.722	513.413	272.141	322.226	429.868	392.698	183.638	145.13	150.06	73.6457	124.313	100.126	170.229	103.857	108.485	519.693	583.636	892.259	14.7231	13.0905	13.3115	33.3193	35.2546	17.6901	20.3751	24.8072
pgaptmp_000282	pgaptmp_000282	pgaptmp_000282	protein_coding	protein_coding	pgaptmp_000282	0.4478	201				TRUE	-1.18045	7.30218e-06	5.9972e-05	Chromosome_I	298325	298525	201	+	9.02178	756.275	926.763	964.677	724.528	711.404	600.359	824.87	773.911	849.438	276.466	221.323	201.932	385.903	365.169	379.427	310.12	327.55	329.424	732.6	785.615	712.81	155.039	190.552	200.321	194.189	183.006	146.2	195.399	167.314
pgaptmp_001813	pgaptmp_001813	tssM	protein_coding	protein_coding	pgaptmp_001813	0.456	3390	GO:0033103	GO:0003674		TRUE	-1.36314	7.31046e-06	5.9972e-05	Chromosome_I	1938538	1941927	3390	+	7.78017	384.69	482.304	565.247	383.084	355.019	327.393	487.052	420.912	393.402	102.918	81.6355	118.566	91.3206	93.2347	98.809	119.666	106.52	116.423	329.139	321.127	273.327	4.67595	5.8798	6.95952	6.08777	5.41497	4.72719	6.84082	5.39547
pgaptmp_001999	pgaptmp_001999	pspC	protein_coding	protein_coding	pgaptmp_001999	0.4359	390				TRUE	1.69735	7.321e-06	5.9972e-05	Chromosome_I	2166203	2166592	390	-	11.2059	1308.26	1931.86	1630.39	1525.29	1316.3	1890.14	1856.89	1773.2	1724.21	3965.38	4067.26	4379.53	3178.55	2670.51	2641.49	6001.84	4686.9	4643.69	1917.84	1441.89	1347.53	138.225	204.716	174.489	210.694	174.516	237.226	226.701	197.575
pgaptmp_005005	pgaptmp_005005	pgaptmp_005005	protein_coding	protein_coding	pgaptmp_005005	0.4606	927				TRUE	1.41631	7.34422e-06	5.9972e-05	Chromosome_II	1958549	1959475	927	+	8.38176	218.942	164.582	178.886	187.058	187.751	164.109	187.842	225.382	232.241	661.905	491.627	611.355	733.511	1084.41	993.36	482.035	568.553	645.619	196.142	198.156	227.634	9.73212	7.33743	8.05448	10.8708	10.4724	8.66534	9.64817	10.5652
pgaptmp_004578	pgaptmp_004578	pgaptmp_004578	protein_coding	protein_coding	pgaptmp_004578	0.446	648				TRUE	-1.36784	7.34866e-06	5.9972e-05	Chromosome_II	1467909	1468556	648	-	6.54396	134.911	183.064	241.782	176.808	160.441	218.537	358.607	334.341	308.95	28.252	23.5836	27.7889	26.5124	41.0676	28.984	45.5068	49.2657	41.0127	135.232	127.431	131.263	8.57891	11.6754	15.5736	14.6991	12.8022	16.5076	26.3497	22.4209
pgaptmp_002998	pgaptmp_002998	rpsJ	protein_coding	protein_coding	pgaptmp_002998	0.4679	312	GO:0006412	GO:0003723,GO:0003735	GO:0005840	TRUE	2.55733	7.35221e-06	5.9972e-05	Chromosome_I	3245143	3245454	312	-	16.8787	122880	81590.4	59627	39122	59737.5	25171.4	29665.6	81446.5	66476.4	433047	492233	487048	252368	278067	277922	349772	303912	296668	43700.6	40975.6	77794.4	16228.7	10807.5	7976.81	6755.08	9900.02	3948.98	4527.22	11343.7
pgaptmp_003192	pgaptmp_003192	pgaptmp_003192	protein_coding	protein_coding		0.5	1000				TRUE	2.32734	7.35538e-06	5.9972e-05	pgaptmp_003192	1	1000	1000	+	13.7423	3163.87	4185.84	4058.83	7713.57	8378.46	12144.1	5004.16	4309.12	3105.69	33319.3	68831.4	59164.3	30548.2	25246.6	25060.6	66591.6	42977	38418.3	11446.1	9872.12	8098.46	130.37	172.991	169.411	415.546	433.219	594.425	238.267	187.252
pgaptmp_000633	pgaptmp_000633	hrpB	protein_coding	protein_coding	pgaptmp_000633	0.471	2469		GO:0004386,GO:0005524		TRUE	1.34746	7.41264e-06	6.03453e-05	Chromosome_I	639726	642194	2469	+	10.7478	1554.95	1479.48	1437.62	948.741	996.102	929.402	998.605	1144.82	1185.83	2369.14	2479.9	2473.21	4289.12	3798.2	4064.35	2381.52	2724.26	2993.92	938.801	1071.7	1169.74	25.951	24.7644	24.3033	20.701	20.8606	18.4253	19.2577	20.149
pgaptmp_000731	pgaptmp_000731	ebgR	protein_coding	protein_coding	pgaptmp_000731	0.4478	987				TRUE	-1.1683	7.42917e-06	6.03864e-05	Chromosome_I	761307	762293	987	-	10.4918	2079.18	2123.72	2262.62	2235.72	2217.51	1687.27	2214.75	2265.76	2388.56	908.102	1023.16	991.136	808.63	939.006	880.059	771.929	886.783	784.533	1751.31	1908.29	1880.89	86.8026	88.9246	95.6832	122.03	116.169	83.676	106.842	99.7549
pgaptmp_000748	pgaptmp_000748	glpK	protein_coding	protein_coding	pgaptmp_000748	0.4822	1518	GO:0006072	GO:0004370		TRUE	2.01518	7.45318e-06	6.04881e-05	Chromosome_I	784424	785941	1518	-	8.33295	481.056	336.205	311.213	250.478	252.61	179.778	201.948	238.815	294.171	397.547	901.618	437.211	508.155	410.676	380.744	492.147	491.326	742.197	115.115	122.334	172.803	13.0582	9.15321	8.55709	8.88919	8.60444	5.79692	6.33434	6.83641
pgaptmp_003413	pgaptmp_003413	pgaptmp_003413	protein_coding	protein_coding	pgaptmp_003413	0.4734	1392	GO:0015031,GO:0030253		GO:0016020	TRUE	-1.34162	7.52038e-06	6.09394e-05	Chromosome_II	157829	159220	1392	-	9.99615	1130.17	1037.66	1025.12	1368.34	1440.56	1191.65	1692.8	1855.3	1795.99	710.337	939.715	850.339	792.428	799.154	802.329	519.114	475.348	568.885	1175.74	1295.34	1549.41	33.4552	30.8075	30.7381	52.9565	53.5101	41.9026	57.9028	57.9177
pgaptmp_003254	pgaptmp_003254	pgaptmp_003254	protein_coding	protein_coding	pgaptmp_003254	0.459	390				TRUE	1.7323	7.57945e-06	6.13236e-05	Chromosome_I	3522322	3522711	390	-	15.1645	36268.8	28878.4	28179	16283.6	20520.8	15129.4	20731.6	27804.1	24775.1	77521.6	102240	87134.8	59136	54436.8	57857.3	69724.8	65998.8	68915.8	17195.1	19279.1	25382	3832.01	3060.2	3015.8	2249.32	2720.66	1898.84	2531.06	3098
pgaptmp_000354	pgaptmp_000354	metH	protein_coding	protein_coding	pgaptmp_000354	0.476	3681	GO:0009086	GO:0008270,GO:0008705,GO:0031419		TRUE	1.42155	7.68166e-06	6.2055e-05	Chromosome_I	375859	379539	3681	+	11.4825	3068.27	2414.16	2355.74	1794.99	2253.69	1684.8	2180.6	3105.35	2921.31	2463.98	3107.59	2954.88	5496.91	4388.69	4633.49	4559.1	4842.69	5106.74	1470.23	1890.45	2061.17	34.3468	27.1045	26.7118	26.27	31.6572	22.4034	28.2061	36.6591
pgaptmp_002607	pgaptmp_002607	ribD	protein_coding	protein_coding	pgaptmp_002607	0.48	1125		GO:0008703,GO:0008835		TRUE	1.67325	7.71682e-06	6.21598e-05	Chromosome_I	2815228	2816352	1125	-	11.6376	3284.13	2466.97	2466.01	1436.24	1941.68	1291.43	1718.79	2614.28	2327.33	4029.95	3923.94	4323.95	9472.31	8734.09	9276.19	5002.37	5886.59	6009.02	1404.29	1692.93	2213.2	120.289	90.6259	91.4921	68.7765	89.2421	56.189	72.7449	100.98
pgaptmp_002628	pgaptmp_002628	pgaptmp_002628	protein_coding	protein_coding	pgaptmp_002628	0.4806	516	GO:0015628		GO:0015627	TRUE	1.57081	7.71827e-06	6.21598e-05	Chromosome_I	2842948	2843463	516	-	6.37609	60.132	66.0088	66.9801	67.9045	70.3211	61.0255	40.0927	35.076	45.0406	135.206	108.847	125.976	131.089	146.512	197.618	139.891	166.438	174.635	55.881	46.5125	41.5391	4.80191	5.28681	5.41798	7.08946	7.04661	5.78888	3.69954	2.95391
pgaptmp_004949	pgaptmp_004949	pgaptmp_004949	protein_coding	protein_coding	pgaptmp_004949	0.4667	900		GO:0001216		TRUE	-1.8936	7.75833e-06	6.238e-05	Chromosome_II	1881565	1882464	900	+	8.14257	347.686	305.401	290.792	470.207	458.794	255.647	611.785	619.427	722.761	252.25	172.342	163.028	206.208	227.537	220.015	91.0135	119.836	105.839	306.787	437.727	515.915	15.9185	14.0239	13.4859	28.1456	26.3584	13.9037	32.366	29.9079
pgaptmp_004151	pgaptmp_004151	pgaptmp_004151	protein_coding	protein_coding	pgaptmp_004151	0.4343	2001				TRUE	-1.68739	7.788e-06	6.238e-05	Chromosome_II	987039	989039	2001	+	6.87261	67.8412	84.4912	78.4158	158.23	148.152	124.525	152.946	129.856	182.977	102.918	96.1484	68.5459	86.9019	89.9048	75.0949	77.53	103.857	64.8265	274.376	266.332	316.528	1.39703	1.74504	1.63568	4.25997	3.82829	3.04609	3.63935	2.82002
pgaptmp_001920	pgaptmp_001920	cydC	protein_coding	protein_coding	pgaptmp_001920	0.4872	1722	GO:0034775,GO:0045454	GO:0005524,GO:0042626,GO:0140359	GO:0016020	TRUE	1.26384	7.79118e-06	6.238e-05	Chromosome_I	2066665	2068386	1722	+	11.4641	2515.52	2366.63	2376.16	1358.09	1627.63	1375.55	1809.37	2171.73	2114.09	4932	6373.01	5820.84	5594.13	4652.85	5049.8	3745.04	4235.52	4342.05	1601.55	1599.9	1936.55	60.194	56.7989	57.5948	42.4874	48.8726	39.0999	50.0296	54.8036
pgaptmp_004376	pgaptmp_004376	modB	protein_coding	protein_coding	pgaptmp_004376	0.4435	690	GO:0015689	GO:0015098	GO:0016020	TRUE	-1.40669	7.79767e-06	6.238e-05	Chromosome_II	1241031	1241720	690	-	9.94049	1324.45	1473.32	1460.49	1754.63	1789.43	1556.97	2080.37	2541.14	2088.76	508.537	536.98	548.367	608.313	471.723	409.728	466.866	451.38	539.78	1091.36	1430.42	1402.36	79.0939	88.2446	88.3469	136.993	134.094	110.45	143.557	160.036
pgaptmp_004490	pgaptmp_004490	pgaptmp_004490	protein_coding	protein_coding	pgaptmp_004490	0.4041	339	GO:0000160	GO:0009927		TRUE	-1.47739	7.80491e-06	6.238e-05	Chromosome_II	1366917	1367255	339	+	7.79995	303.744	394.292	379.01	500.956	443.774	408.211	477.4	415.688	501.781	100.9	94.3343	118.566	85.429	117.653	102.761	119.666	113.178	89.9633	331.933	331.959	281.635	36.9203	48.0685	46.665	79.6093	67.6871	58.941	67.0526	53.285
pgaptmp_004036	pgaptmp_004036	pgaptmp_004036	protein_coding	protein_coding	pgaptmp_004036	0.4554	2400	GO:0009297	GO:0015473	GO:0016020	TRUE	-1.35638	7.91281e-06	6.31464e-05	Chromosome_II	805394	807793	2400	+	7.93948	279.845	293.959	314.48	343.366	312.007	351.309	502.644	413.449	410.996	157.404	166.899	146.355	128.143	113.214	137.015	158.431	131.819	164.051	439.784	373.374	393.79	4.80468	5.06194	5.46918	7.70745	6.72198	7.16491	9.97199	7.48597
pgaptmp_002859	pgaptmp_002859	degS	protein_coding	protein_coding	pgaptmp_002859	0.4785	1068		GO:0008236,GO:0045152	GO:0030288	TRUE	-1.41728	7.96725e-06	6.34845e-05	Chromosome_I	3106271	3107338	1068	+	11.0121	2774.55	3103.29	3105.59	2784.08	2499.47	2298.35	2580.04	2575.47	2644.73	1798.04	1748.81	1696.97	1409.58	1833.61	1716.64	862.943	1094.5	1136.45	2469.94	2855.74	3019.89	107.048	120.086	121.371	140.435	121.01	105.336	115.024	104.791
pgaptmp_002454	pgaptmp_002454	htpG	protein_coding	protein_coding	pgaptmp_002454	0.4504	1905	GO:0006457	GO:0005524,GO:0016887,GO:0051082		TRUE	1.54579	8.09799e-06	6.43359e-05	Chromosome_I	2672612	2674516	1905	-	12.4892	4569.26	4116.31	3958.36	2920.53	3090.03	2173.83	2974.28	3830.75	3576.51	10919.4	8832.96	10824.7	18781.1	21078.8	17701.3	8374.93	9352.5	9242.4	2628.64	2811.14	3829.07	98.8346	89.3006	86.7284	82.5908	83.8711	55.8551	74.3396	87.3828
pgaptmp_002649	pgaptmp_002649	pgaptmp_002649	protein_coding	protein_coding	pgaptmp_002649	0.4278	2265				TRUE	-1.21428	8.09857e-06	6.43359e-05	Chromosome_I	2865779	2868043	2265	-	10.8308	2951.86	3318.04	3191.36	2717.46	2738.43	2074.87	2698.09	2515.77	2672.88	936.354	849.009	783.646	1178.33	1343.02	1206.79	1110.7	1199.69	1113.96	2653.23	2904.16	2435.02	53.7015	60.5418	58.8096	64.6338	62.514	44.8389	56.718	48.2659
pgaptmp_004472	pgaptmp_004472	tssH	protein_coding	protein_coding	pgaptmp_004472	0.4124	2556	GO:0033103	GO:0016887	GO:0033104	TRUE	-1.39867	8.15833e-06	6.47129e-05	Chromosome_II	1342128	1344683	2556	-	6.80435	114.867	137.298	147.846	202.432	180.923	213.589	221.252	182.097	169.606	94.8462	54.4236	48.1674	42.7145	75.4757	63.2378	69.1029	62.5808	54.2426	193.348	167.572	172.803	1.8518	2.21996	2.4143	4.26661	3.65997	4.09026	4.12154	3.09584
pgaptmp_000102	pgaptmp_000102	ftsX	protein_coding	protein_coding	pgaptmp_000102	0.4654	969	GO:0000910			TRUE	1.2101	8.20021e-06	6.49346e-05	Chromosome_I	106912	107880	969	+	11.4137	2072.24	2179.17	2064.13	1855.2	1966.94	1908.28	1804.91	1967.99	1910.71	3519.4	3764.3	3979.37	4281.76	3680.55	3999.79	4431.01	4919.91	5012.81	1923.98	2003.86	2289.63	88.12	92.9413	88.9108	103.141	104.957	96.3944	88.6881	88.2543
pgaptmp_000672	pgaptmp_000672	secG	protein_coding	protein_coding	pgaptmp_000672	0.4513	339	GO:0015739	GO:0015136	GO:0016020	TRUE	1.70067	8.21098e-06	6.49346e-05	Chromosome_I	697305	697643	339	+	14.6769	11297.9	12005.7	12642.1	15525.1	15698.7	20168.1	10164.2	9472.01	9730.88	67919.9	72544.9	73627.5	49735.9	46261	48892	71774.3	62506.2	56708.6	22766.5	18193.4	17813.6	1373.27	1463.62	1556.54	2467.18	2394.46	2912.04	1427.6	1214.17
pgaptmp_000095	pgaptmp_000095	pgaptmp_000095	protein_coding	protein_coding	pgaptmp_000095	0.4573	621				TRUE	1.52471	8.24184e-06	6.50771e-05	Chromosome_I	102198	102818	621	+	9.58155	710.791	800.906	823.365	707.872	652.689	844.461	669.696	555.992	524.301	395.529	404.549	431.654	659.865	699.26	885.329	2521.41	2134.4	1714.59	781.217	756.306	657.979	47.1638	53.3006	55.3404	61.4084	54.3449	66.5611	51.3475	38.9058
pgaptmp_002048	pgaptmp_002048	pgaptmp_002048	protein_coding	protein_coding	pgaptmp_002048	0.4478	594		GO:0016872		TRUE	2.4452	8.25374e-06	6.50771e-05	Chromosome_I	2214408	2215001	594	-	8.01221	164.977	136.418	145.396	105.7	103.092	97.3109	86.125	116.422	110.49	375.349	908.875	500.2	1474.39	733.668	1114.57	453.382	983.983	649.588	124.056	132.529	105.509	11.4445	9.49133	10.2166	9.58638	8.97394	8.01877	6.9036	8.51702
pgaptmp_004748	pgaptmp_004748	pgaptmp_004748	protein_coding	protein_coding	pgaptmp_004748	0.4576	909		GO:0016491		TRUE	-1.82795	8.30724e-06	6.53705e-05	Chromosome_II	1667700	1668608	909	-	10.4418	2274.22	2290.94	2210.34	2476.59	2536.34	1716.96	3739.01	3862.84	4049.43	563.023	645.827	640.996	642.19	734.778	671.901	547.767	519.287	710.445	1598.76	2285.48	2528.07	103.093	104.158	101.493	146.776	144.274	92.4547	195.851	184.663
pgaptmp_001462	pgaptmp_001462	sbcB	protein_coding	protein_coding	pgaptmp_001462	0.4536	1422	GO:0006281	GO:0000175,GO:0003676,GO:0008310		TRUE	-1.20919	8.32179e-06	6.53705e-05	Chromosome_I	1512564	1513985	1422	-	11.7176	5975.42	6007.68	5512.79	4541.27	4414.53	2739.55	5457.8	6192.78	5934.1	2179.44	1942.92	1995.24	1854.4	2286.47	2263.39	2049.49	1906.72	1873.35	4007.23	4496.42	5052.81	173.152	174.602	161.813	172.045	160.52	94.3001	182.747	189.245
pgaptmp_001218	pgaptmp_001218	nrfC	protein_coding	protein_coding	pgaptmp_001218	0.4672	687				TRUE	-1.74818	8.33968e-06	6.53705e-05	Chromosome_I	1300868	1301554	687	+	7.26551	306.827	360.848	401.881	292.118	252.61	225.135	296.983	275.384	300.505	100.9	61.6801	66.6933	57.4436	105.444	92.2218	42.1359	71.9013	56.8885	206.76	231.288	205.203	18.4033	21.7075	24.4164	22.9068	19.0124	16.0405	20.5829	17.4188
pgaptmp_000622	pgaptmp_000622	pgaptmp_000622	protein_coding	protein_coding	pgaptmp_000622	0.4698	1671		GO:0015103	GO:0016020	TRUE	1.12461	8.34068e-06	6.53705e-05	Chromosome_I	628973	630643	1671	+	8.83747	348.457	396.933	423.935	269.056	288.112	348.01	345.243	314.191	311.062	552.933	573.262	494.642	841.034	690.38	855.028	724.737	790.915	742.197	341.433	345.339	336.466	8.59273	9.81707	10.5892	8.67421	8.91515	10.1941	9.83741	8.17062
pgaptmp_003285	pgaptmp_003285	pgaptmp_003285	protein_coding	protein_coding	pgaptmp_003285	0.4669	1026		GO:0016747		TRUE	-1.34533	8.35342e-06	6.5373e-05	Chromosome_II	21347	22372	1026	+	8.79118	536.562	720.816	645.296	770.011	759.195	698.494	1012.71	851.526	964.854	310.773	243.092	220.458	217.991	178.7	196.301	266.299	229.019	224.908	644.308	676.024	549.977	21.5492	29.0348	26.2514	40.431	38.2604	33.3233	46.9971	36.0652
pgaptmp_001859	pgaptmp_001859	pgaptmp_001859	protein_coding	protein_coding	pgaptmp_001859	0.4836	852				TRUE	-1.85446	8.39537e-06	6.55667e-05	Chromosome_I	1989826	1990677	852	-	7.20915	844.16	543.912	378.193	442.02	534.577	315.848	282.876	545.544	418.737	54.4861	47.1672	44.4622	44.1874	52.167	55.3331	28.6524	41.2767	46.3046	144.732	149.732	203.541	40.8266	26.3834	18.5274	27.949	32.4425	18.1456	15.8085	27.8245
pgaptmp_003199	pgaptmp_003199	ilvC	protein_coding	protein_coding	pgaptmp_003199	0.4653	1485	GO:0009082	GO:0004455		TRUE	-1.47174	8.40841e-06	6.55667e-05	Chromosome_I	3469070	3470554	1485	-	11.9407	10769.8	9614.4	8540.78	5274.13	5809.34	3475.98	6962.76	10007.1	9480.34	1622.47	1814.12	1750.7	1991.38	1768.13	1852.34	2014.1	2114.43	1952.73	4485.01	5853.56	6645.42	298.84	267.57	240.056	191.332	202.276	114.573	223.248	292.833
pgaptmp_002984	pgaptmp_002984	rpsN	protein_coding	protein_coding	pgaptmp_002984	0.4673	306	GO:0006412	GO:0003735	GO:0005840	TRUE	2.15723	8.41558e-06	6.55667e-05	Chromosome_I	3238759	3239064	306	-	15.9838	68632.2	48798.1	40394.7	20504.6	28480.7	16153.6	22848.4	45881.6	37867.9	189030	181407	229080	171608	170473	177808	132583	132282	129108	23975.8	24178.2	40702.5	9241.97	6590.57	5509.91	3609.89	4812.53	2583.93	3555.22	6515.61
pgaptmp_000399	pgaptmp_000399	tldD	protein_coding	protein_coding	pgaptmp_000399	0.4959	1446	GO:0006508	GO:0008237		TRUE	1.54841	8.47479e-06	6.59303e-05	Chromosome_I	434343	435788	1446	+	11.8439	3124.55	2422.08	2534.63	1786.02	2438.03	1638.62	1807.88	2305.31	2370.26	5585.83	6345.8	6571.14	6875.56	6872.73	7435.71	6997.93	7360.56	8062.3	2155.89	2347.92	3185.22	89.0384	69.2249	73.1622	66.5398	87.1794	55.4679	59.5299	69.2786
pgaptmp_004489	pgaptmp_004489	pgaptmp_004489	protein_coding	protein_coding	pgaptmp_004489	0.4304	1545	GO:0000160			TRUE	-1.67946	8.49329e-06	6.59758e-05	Chromosome_II	1365369	1366913	1545	+	8.94583	1008.37	1130.95	1149.28	1180	985.179	840.337	1424.03	1367.22	1439.19	223.998	174.156	207.49	206.208	179.81	191.031	242.703	182.416	148.175	666.661	642.255	581.547	26.8936	30.2522	31.0484	41.1451	32.9709	26.6231	43.8858	38.4545
pgaptmp_000052	pgaptmp_000052	pgaptmp_000052	protein_coding	protein_coding	pgaptmp_000052	0.4578	675	GO:1990397			TRUE	1.42202	8.52027e-06	6.59758e-05	Chromosome_I	57242	57916	675	+	10.2648	809.469	1086.06	1094.55	876.993	987.909	1698.82	674.894	586.59	563.711	1991.77	1609.13	2052.67	2119.52	1570.56	1605.98	2556.81	2303.51	1968.61	975.683	779.243	777.611	49.4145	66.4957	67.6821	69.9933	75.6758	123.19	47.6063	37.7632
pgaptmp_001250	pgaptmp_001250	pgaptmp_001250	protein_coding	protein_coding	pgaptmp_001250	0.4279	222				TRUE	-1.57934	8.52448e-06	6.59758e-05	Chromosome_I	1336210	1336431	222	+	8.82824	511.122	640.725	750.668	605.375	580.32	776.013	609.557	544.051	510.226	343.061	406.363	337.172	540.559	428.435	429.49	163.487	205.052	187.864	676.16	559.424	484.346	94.8702	119.278	141.135	146.905	135.163	171.1	130.736	106.494
pgaptmp_000006	pgaptmp_000006	pgaptmp_000006	protein_coding	protein_coding	pgaptmp_000006	0.4864	1254		GO:0030170		TRUE	1.23386	8.53976e-06	6.59758e-05	Chromosome_I	7249	8502	1254	-	10.9874	1894.93	2004.03	1710.44	1393.32	1425.54	1335.14	1183.48	1604.54	1499.71	2235.95	2416.41	2510.26	4814.95	3772.67	4312.03	2634.34	3113.06	3234.71	1198.65	1266.67	1352.51	62.2664	66.0461	56.9314	59.8575	58.7794	52.1149	44.9361	55.602
pgaptmp_004202	pgaptmp_004202	pgaptmp_004202	protein_coding	protein_coding	pgaptmp_004202	0.4302	888	GO:0006355	GO:0003700		TRUE	-1.65434	8.54336e-06	6.59758e-05	Chromosome_II	1052048	1052935	888	+	8.4088	299.889	403.094	394.529	636.124	619.236	738.903	639.998	608.233	605.233	223.998	206.81	155.618	213.572	163.161	148.872	198.881	163.775	175.958	720.865	544.77	485.176	13.9157	18.7601	18.5442	38.5916	36.0568	40.7293	34.3161	29.7642
pgaptmp_004659	pgaptmp_004659	pgaptmp_004659	protein_coding	protein_coding	pgaptmp_004659	0.4539	987		GO:0003924,GO:0005525		TRUE	-1.07623	8.56692e-06	6.60607e-05	Chromosome_II	1574341	1575327	987	-	10.7501	2028.3	2309.43	2358.19	2328.61	2178.59	2436.07	3718.97	3315.8	3208.44	1198.69	1173.74	1306.08	1225.46	1048.89	1052.65	928.675	949.364	947.26	1901.07	2073.95	2027.11	84.6784	96.7005	99.7247	127.1	114.131	120.811	179.406	145.985
pgaptmp_003171	pgaptmp_003171	edd	protein_coding	protein_coding	pgaptmp_003171	0.5214	1797	GO:0009255	GO:0004456		TRUE	3.06254	8.61455e-06	6.62599e-05	Chromosome_I	3437890	3439686	1797	+	11.9592	2190.19	1680.14	1856.66	1177.44	1411.88	1285.66	1461.9	1820.97	1889.59	5763.42	7363.52	8090.26	8862.52	8340.06	11309	15507.7	16755.7	36097.8	2638.7	2382.33	3190.2	50.2218	38.6402	43.1245	35.2983	40.6251	35.0195	38.7348	44.0343
pgaptmp_000223	pgaptmp_000223	pgaptmp_000223	protein_coding	protein_coding	pgaptmp_000223	0.489	957				TRUE	-1.21024	8.61795e-06	6.62599e-05	Chromosome_I	240768	241724	957	+	9.61748	1086.23	1114.23	1168.88	1120.42	1204.33	875.798	885.009	947.052	1024.67	425.799	446.274	440.917	676.067	740.328	716.695	438.213	524.613	453.785	1039.39	1151.98	1132.36	46.7701	48.1176	50.9801	63.0717	65.0698	44.7945	44.032	43.0031
pgaptmp_003426	pgaptmp_003426	pgaptmp_003426	protein_coding	protein_coding	pgaptmp_003426	0.3822	450				TRUE	-1.74964	8.65458e-06	6.63832e-05	Chromosome_II	173964	174413	450	-	8.9564	434.8	502.547	521.955	959.632	903.934	983.005	1141.16	900.781	975.411	314.809	275.746	263.068	182.641	258.615	243.729	306.749	260.975	248.722	1126	962.745	714.472	39.814	46.1536	48.4129	114.883	103.865	106.924	120.744	86.985
pgaptmp_000229	pgaptmp_000229	gpmM	protein_coding	protein_coding	pgaptmp_000229	0.4729	1533	GO:0006007	GO:0004619		TRUE	-1.83281	8.65923e-06	6.63832e-05	Chromosome_I	246724	248256	1533	+	14.8639	67773.4	68400	63415.5	46546.6	45054.7	21104.1	48823.3	70992.3	62637.4	13817.3	13867.1	14835.5	17976.9	18860	19367.9	12121.7	12689.3	13051.3	33611.9	47440.8	54514.2	1821.69	1843.98	1726.61	1635.72	1519.64	673.841	1516.41	2012.36
pgaptmp_001146	pgaptmp_001146	pgaptmp_001146	protein_coding	protein_coding	pgaptmp_001146	0.4569	1020				TRUE	1.46014	8.68886e-06	6.65134e-05	Chromosome_I	1215425	1216444	1020	-	9.44668	494.932	444.459	552.178	428.567	477.911	352.133	331.878	344.79	362.436	1596.24	1534.75	1895.2	1349.19	1357.45	1388.6	1021.37	1250.28	1251.55	472.753	430.718	361.39	19.9942	18.0083	22.5954	22.6351	24.2265	16.8982	15.4921	14.689
pgaptmp_001108	pgaptmp_001108	pgaptmp_001108	protein_coding	protein_coding	pgaptmp_001108	0.475	2061	GO:0006812	GO:0042625	GO:0016020	TRUE	-1.72345	8.73482e-06	6.66826e-05	Chromosome_I	1181154	1183214	2061	-	9.59523	2990.41	2216.13	1910.57	1441.37	1486.98	1072.07	1306.72	2176.2	1902.26	304.719	335.612	289.004	329.933	317.442	258.221	337.087	319.561	287.089	849.95	946.179	1399.04	59.7876	44.4385	38.6924	37.6757	37.3055	25.4611	30.1883	45.8838
pgaptmp_002985	pgaptmp_002985	rplE	protein_coding	protein_coding	pgaptmp_002985	0.4667	540	GO:0006412	GO:0003735	GO:0005840	TRUE	2.06316	8.73633e-06	6.66826e-05	Chromosome_I	3239082	3239621	540	-	16.8485	121582	89750.8	73857	38369.2	57616.2	33162.4	41980.8	88681.1	71896.1	328916	347074	421405	339789	273019	287142	227606	220034	221748	45270.3	44550	71252.8	9277.58	6868.88	5708.72	3827.84	5516.9	3005.97	3701.6	7136.33
pgaptmp_001738	pgaptmp_001738	pgaptmp_001738	protein_coding	protein_coding	pgaptmp_001738	0.4082	267				TRUE	1.73582	8.87711e-06	6.7659e-05	Chromosome_I	1838326	1838592	267	+	8.83966	218.171	199.787	191.955	310.055	257.389	418.932	225.707	168.663	185.089	1372.24	1168.29	1443.17	580.328	684.831	690.346	1447.79	960.016	1065.01	338.639	280.349	407.914	33.6701	30.9241	30.0075	62.5592	49.8451	76.8006	40.2501	27.4503
pgaptmp_002819	pgaptmp_002819	pgaptmp_002819	protein_coding	protein_coding	pgaptmp_002819	0.4815	621				TRUE	1.08078	8.89395e-06	6.76893e-05	Chromosome_I	3061145	3061765	621	+	8.90054	326.871	393.412	333.267	310.695	338.634	388.419	239.814	237.323	242.093	710.337	687.552	635.439	966.231	910.148	915.63	797.211	834.854	800.408	375.52	372.1	391.298	21.6892	26.1817	22.3997	26.953	28.1957	30.6155	18.3872	16.6068
pgaptmp_001855	pgaptmp_001855	hrpA	protein_coding	protein_coding	pgaptmp_001855	0.481	4017		GO:0003676,GO:0003724,GO:0005524		TRUE	1.85003	8.93989e-06	6.79406e-05	Chromosome_I	1983747	1987763	4017	-	12.1191	4970.91	3253.79	3250.99	1811	2388.19	1505.84	1768.53	3050.12	2852.34	9462.42	9409.85	10500.5	12194.3	10983.9	11385.4	7576.03	8124.85	8489.62	1792.66	1907.65	3034.84	50.9909	33.4757	33.7796	24.2874	30.7405	18.3489	20.9626	32.9953
pgaptmp_001235	pgaptmp_001235	pgaptmp_001235	protein_coding	protein_coding	pgaptmp_001235	0.437	540				TRUE	2.06148	8.98281e-06	6.81682e-05	Chromosome_I	1317774	1318313	540	+	4.35355	6.9383	11.4415	22.8713	10.2497	14.3373	17.318	7.42457	10.4482	14.0752	18.162	27.2118	33.3466	61.8624	27.7484	43.476	42.1359	71.9013	78.0564	11.1762	7.00873	7.47703	0.529441	0.875652	1.76782	1.02255	1.37283	1.56978	0.654652	0.840783
pgaptmp_004709	pgaptmp_004709	pgaptmp_004709	protein_coding	protein_coding	pgaptmp_004709	0.4803	939				TRUE	1.64067	9.01047e-06	6.8238e-05	Chromosome_II	1625449	1626387	939	-	6.98722	61.6738	76.5702	95.5692	87.1228	98.9958	98.1356	69.791	99.2576	80.2286	155.386	156.014	135.239	182.641	216.438	197.618	374.167	233.014	321.486	89.9684	88.5649	101.355	2.70641	3.37004	4.24809	4.99839	5.45124	5.11556	3.53889	4.59341
pgaptmp_000911	pgaptmp_000911	pgaptmp_000911	protein_coding	protein_coding	pgaptmp_000911	0.4476	735	GO:0006352,GO:0006355	GO:0003677,GO:0003899,GO:0016987		TRUE	1.20267	9.01795e-06	6.8238e-05	Chromosome_I	958821	959555	735	+	12.7228	6942.16	6858.75	6704.55	4659.79	5209.23	4021.91	5347.18	6487.57	5969.99	8707.69	9986.74	10154.1	8068.62	7648.57	7791.42	10444.6	9834.5	10607.7	4320.16	4279.79	4845.95	389.193	385.655	380.735	341.541	366.463	267.841	346.394	383.559
pgaptmp_004126	pgaptmp_004126	pgaptmp_004126	protein_coding	protein_coding	pgaptmp_004126	0.4517	1647		GO:0016788		TRUE	-1.54749	9.04967e-06	6.83796e-05	Chromosome_II	939353	940999	1647	-	8.4721	501.1	528.95	414.133	553.486	580.32	415.633	605.103	740.327	794.544	221.98	203.182	220.458	265.124	228.647	248.999	133.149	182.416	160.082	440.901	436.453	575.732	12.5369	13.2728	10.4951	18.1041	18.2187	12.3523	17.4932	19.5329
pgaptmp_002870	pgaptmp_002870	pgaptmp_002870	protein_coding	protein_coding	pgaptmp_002870	0.4457	819	GO:0034220	GO:0005216		TRUE	-1.1551	9.09985e-06	6.86601e-05	Chromosome_I	3121952	3122770	819	+	10.0124	1395.37	1691.58	1937.52	1483.65	1364.09	1468.73	1528.72	1420.2	1368.11	579.167	497.069	439.064	581.801	688.161	669.267	733.164	676.405	713.091	1670.84	1638.77	1455.53	70.2043	85.3594	98.7424	97.5914	86.12	87.7793	88.8744	75.3537
pgaptmp_003072	pgaptmp_003072	pgaptmp_003072	protein_coding	protein_coding	pgaptmp_003072	0.4426	1419	GO:0000160,GO:0006355	GO:0003677		TRUE	-1.2884	9.11934e-06	6.87086e-05	Chromosome_I	3322739	3324157	1419	+	9.9385	1567.29	1593.89	1262.82	1391.4	1279.43	850.233	1058.74	1079.89	1177.39	778.949	640.385	590.977	773.28	1061.1	1007.85	579.79	479.342	597.991	1243.91	1319.55	1536.95	45.5118	46.4214	37.145	52.8244	46.6208	29.3284	35.5256	33.0701
pgaptmp_003515	pgaptmp_003515	pgaptmp_003515	protein_coding	protein_coding	pgaptmp_003515	0.5172	957				TRUE	2.54152	9.1332e-06	6.87146e-05	Chromosome_II	265209	266165	957	-	7.07476	47.7972	39.6053	40.8415	66.6233	92.1685	37.9348	46.7748	50.002	52.0782	270.412	299.33	237.132	829.25	668.182	748.314	301.693	571.216	455.108	58.1163	52.8841	98.0322	2.05802	1.71034	1.78128	3.75041	4.97983	1.94025	2.3272	2.27045
pgaptmp_001856	pgaptmp_001856	pgaptmp_001856	protein_coding	protein_coding	pgaptmp_001856	0.4427	585		GO:0009055,GO:0010181,GO:0016491,GO:0050446		TRUE	-1.61358	9.20158e-06	6.90382e-05	Chromosome_I	1987960	1988544	585	+	6.6093	140.308	247.313	200.94	104.419	124.257	95.6616	152.946	141.05	183.681	102.918	97.9626	77.8088	57.4436	54.3869	63.2378	32.0233	31.9561	42.3356	140.261	131.254	110.494	9.8829	17.4716	14.3368	9.61587	10.9827	8.00413	12.4485	10.4774
pgaptmp_004826	pgaptmp_004826	pgaptmp_004826	protein_coding	protein_coding	pgaptmp_004826	0.4419	792	GO:0009058	GO:0016853	GO:0005737	TRUE	-1.37887	9.20766e-06	6.90382e-05	Chromosome_II	1753068	1753859	792	+	7.80476	264.427	293.959	297.326	343.366	335.903	319.147	383.108	458.973	376.511	133.188	143.316	159.323	141.4	157.611	167.317	126.408	94.5369	101.87	306.787	297.552	276.65	13.7575	15.3392	15.6693	23.3559	21.9297	19.7241	23.0318	25.1825
pgaptmp_002086	pgaptmp_002086	pgaptmp_002086	protein_coding	protein_coding	pgaptmp_002086	0.4807	1758				TRUE	-1.66495	9.23501e-06	6.90382e-05	Chromosome_I	2258608	2260365	1758	-	8.69136	932.817	1061.42	1124.78	495.19	553.694	583.041	981.529	1018.7	1014.82	147.314	206.81	166.733	204.735	185.359	162.047	160.116	189.074	213.001	523.046	748.66	576.562	21.8643	24.9523	26.7047	15.1746	16.2853	16.2335	26.5838	25.1804
pgaptmp_004139	pgaptmp_004139	pgaptmp_004139	protein_coding	protein_coding	pgaptmp_004139	0.4405	9966				TRUE	-1.13797	9.24171e-06	6.90382e-05	Chromosome_II	957137	967102	9966	+	9.67699	669.932	707.614	744.95	1055.08	1025.46	1009.39	1141.16	1179.9	1154.17	742.625	647.641	631.734	631.88	611.575	512.49	561.25	623.145	546.394	1274.65	1199.77	1379.93	2.76992	2.93439	3.11995	5.70335	5.32037	4.95761	5.45202	5.14471
pgaptmp_003570	pgaptmp_003570	pgaptmp_003570	protein_coding	protein_coding	pgaptmp_003570	0.4463	726				TRUE	1.39156	9.24186e-06	6.90382e-05	Chromosome_II	323717	324442	726	-	7.87872	74.0086	83.6111	62.896	174.886	185.702	332.341	115.081	105.228	111.194	306.737	277.561	359.403	338.77	347.41	436.077	682.601	786.92	656.203	303.993	254.863	235.111	4.20053	4.75958	3.61599	12.9773	13.2259	22.4068	7.54743	6.29843
pgaptmp_002052	pgaptmp_002052	pgaptmp_002052	protein_coding	protein_coding	pgaptmp_002052	0.4401	1311				TRUE	2.61151	9.26348e-06	6.90834e-05	Chromosome_I	2217553	2218863	1311	-	9.14652	597.465	406.614	418.217	283.79	274.457	183.076	248.723	411.956	420.144	637.689	1404.13	781.793	2285.96	1256.45	1492.68	950.586	2082.48	1381.2	177.702	249.129	278.312	18.7788	12.818	13.315	11.6616	10.8247	6.83538	9.0333	13.6548
pgaptmp_005125	pgaptmp_005125	pgaptmp_005125	protein_coding	protein_coding	pgaptmp_005125	0.4954	432		GO:0003677		TRUE	-1.33274	9.27417e-06	6.90834e-05	Chromosome_II	2093924	2094355	432	-	9.53768	914.314	882.757	906.682	924.398	858.874	658.91	1235.45	1064.22	1172.46	678.049	685.738	694.722	461.022	663.742	644.235	345.514	403.446	395.574	852.744	950.002	1136.51	87.2107	84.4499	87.6017	115.276	102.799	74.6578	136.168	107.05
pgaptmp_002431	pgaptmp_002431	sdhD	protein_coding	protein_coding	pgaptmp_002431	0.4145	345	GO:0006099	GO:0000104,GO:0020037	GO:0016020,GO:0045273	TRUE	2.38184	9.38895e-06	6.98395e-05	Chromosome_I	2647584	2647928	345	-	8.72182	424.778	342.365	410.866	318.382	317.469	357.082	407.609	467.182	428.59	284.538	471.672	309.383	309.312	243.076	293.792	1356.78	1126.45	2185.58	223.524	326.225	328.989	50.7343	41.0121	49.7075	49.7158	47.5802	50.6618	56.2545	58.8444
pgaptmp_003087	pgaptmp_003087	pgaptmp_003087	protein_coding	protein_coding	pgaptmp_003087	0.5	630		GO:0031992	GO:0016020	TRUE	1.20916	9.42116e-06	6.98851e-05	Chromosome_I	3339319	3339948	630	+	7.56445	151.872	177.784	185.421	115.95	161.807	130.298	120.278	118.661	142.159	248.214	253.977	261.215	326.987	277.484	304.332	273.041	315.567	309.579	123.497	122.334	128.771	9.93333	11.6625	12.2845	9.91505	13.2801	10.1235	9.09031	8.18476
pgaptmp_000499	pgaptmp_000499	pgaptmp_000499	protein_coding	protein_coding	pgaptmp_000499	0.4524	126				TRUE	2.82153	9.42166e-06	6.98851e-05	Chromosome_I	516431	516556	126	+	6.70107	286.012	154.901	227.896	22.4213	29.3574	18.1427	14.1067	17.9111	28.1504	353.151	529.723	431.654	399.16	301.903	316.189	251.13	254.318	343.977	40.2343	14.6546	43.2006	93.5346	50.8071	75.493	9.58638	12.0473	7.04798	5.33074	6.17718
pgaptmp_002047	pgaptmp_002047	pgaptmp_002047	protein_coding	protein_coding	pgaptmp_002047	0.4528	519				TRUE	1.9026	9.4619e-06	6.99916e-05	Chromosome_I	2213875	2214393	519	-	8.34836	199.669	213.868	188.688	144.137	180.923	154.213	167.795	129.11	149.197	425.799	825.425	509.463	1285.85	652.643	988.09	578.104	1031.92	721.029	211.789	201.979	191.911	15.8526	17.0302	15.1746	14.9614	18.0248	14.5441	15.3938	10.8101
pgaptmp_001268	pgaptmp_001268	pgaptmp_001268	protein_coding	protein_coding	pgaptmp_001268	0.487	1041				TRUE	1.17235	9.46264e-06	6.99916e-05	Chromosome_I	1355903	1356943	1041	+	8.49328	314.536	285.158	312.029	225.494	178.875	208.641	250.208	312.699	312.469	437.907	408.177	502.052	661.338	645.983	663.997	551.137	591.189	597.991	231.347	252.314	276.65	12.4503	11.3208	12.5108	11.6694	8.88471	9.81029	11.4441	13.0531
pgaptmp_001568	pgaptmp_001568	pgaptmp_001568	protein_coding	protein_coding	pgaptmp_001568	0.4788	777				TRUE	1.24789	9.51874e-06	7.03077e-05	Chromosome_I	1627944	1628720	777	-	7.46134	141.85	187.465	162.549	151.184	131.767	138.544	147.007	163.439	135.122	221.98	190.483	201.932	241.558	325.211	268.761	279.782	258.312	234.169	97.233	109.591	103.017	7.52256	9.97104	8.73183	10.4821	8.76857	8.72771	9.00842	9.14056
pgaptmp_000342	pgaptmp_000342	cysI	protein_coding	protein_coding	pgaptmp_000342	0.4577	1737	GO:0000103,GO:0008652	GO:0004783,GO:0050661,GO:0051539	GO:0009337	TRUE	1.74485	9.53313e-06	7.03152e-05	Chromosome_I	359965	361701	1737	+	9.41433	525.769	488.465	439.455	320.304	363.895	273.79	353.41	405.24	411.699	1622.47	1171.92	1337.57	2338.99	2491.81	2196.2	1053.4	1423.38	873.173	344.227	344.702	292.435	12.4725	11.6218	10.5598	9.93407	10.8323	7.71526	9.68749	10.1379
pgaptmp_001215	pgaptmp_001215	pgaptmp_001215	protein_coding	protein_coding	pgaptmp_001215	0.4523	555				TRUE	-2.16767	9.71711e-06	7.14781e-05	Chromosome_I	1297735	1298289	555	+	7.9238	548.126	544.792	609.356	517.612	491.565	357.906	601.39	655.25	655.2	70.6301	79.8213	105.598	76.5915	95.4545	113.301	74.1592	117.173	76.7334	309.022	498.257	501.792	40.6954	40.5676	45.8267	50.243	45.7965	31.5652	51.5937	51.304
pgaptmp_004224	pgaptmp_004224	pgaptmp_004224	protein_coding	protein_coding	pgaptmp_004224	0.504	1605				TRUE	1.90212	9.71798e-06	7.14781e-05	Chromosome_II	1073279	1074883	1605	-	5.64564	33.9206	27.2836	22.8713	32.0304	40.9638	24.7401	24.5011	32.8371	32.3729	68.6121	79.8213	85.2192	114.887	130.972	130.428	101.126	114.51	124.361	26.8229	15.2918	29.9081	0.870857	0.702536	0.59478	1.07511	1.31968	0.754499	0.726847	0.889052
pgaptmp_000149	pgaptmp_000149	rpoB	protein_coding	protein_coding	pgaptmp_000149	0.4641	4029	GO:0006351	GO:0003677,GO:0003899		TRUE	2.21518	9.74618e-06	7.15854e-05	Chromosome_I	149846	153874	4029	+	16.1179	78552.4	47445.3	43647.4	21607.7	30072.2	17091.3	22311.6	48501.9	42372	196309	209776	242791	192744	207478	202290	147701	149596	161001	25584.6	27698.5	46057.7	803.379	486.674	452.17	288.919	385.933	207.639	263.673	523.117
pgaptmp_000222	pgaptmp_000222	pgaptmp_000222	protein_coding	protein_coding	pgaptmp_000222	0.4497	636				TRUE	-1.44971	1.00982e-05	7.39863e-05	Chromosome_I	239946	240581	636	+	11.2501	2923.34	3589.12	3612.03	3638.02	3422.52	4084.58	3403.42	2568.01	2817.85	1109.9	1079.4	989.284	1576.02	2143.29	2181.7	1746.11	1430.04	1575.68	5203.64	3887.3	3944.55	189.4	233.223	237.047	308.157	278.249	314.357	254.795	175.46
pgaptmp_001270	pgaptmp_001270	rimJ	protein_coding	protein_coding	pgaptmp_001270	0.4615	585		GO:0008080		TRUE	1.3099	1.01012e-05	7.39863e-05	Chromosome_I	1358653	1359237	585	+	9.77207	696.143	563.275	596.287	564.376	759.878	503.873	402.412	474.645	508.114	1576.06	1716.16	1637.69	1852.93	1720.4	1829.94	1329.81	1382.1	1465.87	515.223	491.248	671.271	49.0344	39.7929	42.5442	51.9729	67.1633	42.1597	32.7527	35.2574
pgaptmp_004997	pgaptmp_004997	pgaptmp_004997	protein_coding	protein_coding	pgaptmp_004997	0.4415	1341	GO:0015031,GO:0030253		GO:0016020	TRUE	-1.51598	1.01364e-05	7.41409e-05	Chromosome_II	1949471	1950811	1341	-	6.56707	87.8852	127.617	112.723	131.325	118.795	135.246	204.176	197.023	185.793	66.5941	63.4943	55.5777	66.2811	61.0465	64.5552	43.8213	37.2822	47.6276	157.584	137.626	122.956	2.70051	3.93298	3.50852	5.27572	4.5805	4.93659	7.2495	6.38447
pgaptmp_003823	pgaptmp_003823	pgaptmp_003823	protein_coding	protein_coding	pgaptmp_003823	0.4093	816				TRUE	-1.27147	1.02345e-05	7.47544e-05	Chromosome_II	587020	587835	816	-	6.86808	121.035	144.339	133.143	196.026	174.096	159.161	224.222	180.604	211.128	72.6481	63.4943	72.251	86.9019	73.2558	75.0949	62.3611	63.9123	66.1495	168.761	177.13	157.848	6.11193	7.31031	6.81037	12.9416	11.0317	9.54727	13.0834	9.61778
pgaptmp_005281	pgaptmp_005281	pgaptmp_005281	protein_coding	protein_coding	pgaptmp_005281	0.4463	726				TRUE	-1.96967	1.02894e-05	7.50391e-05	Chromosome_II	2263276	2264001	726	-	10.0351	1416.96	1467.15	1599.35	3598.94	3401.36	2738.72	4081.29	4228.52	4275.34	173.548	319.285	192.669	328.46	188.689	233.189	480.349	466.027	783.21	2026.8	2600.24	2252.25	80.4226	83.5182	91.9494	267.056	242.248	184.648	267.666	253.099
pgaptmp_000279	pgaptmp_000279	pgaptmp_000279	protein_coding	protein_coding	pgaptmp_000279	0.4875	1920		GO:0005524		TRUE	1.40082	1.0302e-05	7.50391e-05	Chromosome_I	293825	295744	1920	-	11.2981	2578.74	2158.93	1879.53	1489.41	1662.45	1420.9	1552.48	1756.79	1716.47	2962.43	3314.4	3488.43	4386.34	4095.67	4173.69	4672.03	4571.06	4965.18	1572.49	1599.9	2219.02	55.3432	46.4706	40.8591	41.7906	44.7703	36.224	38.4997	39.7608
pgaptmp_005089	pgaptmp_005089	pgaptmp_005089	protein_coding	protein_coding	pgaptmp_005089	0.4885	477		GO:0008113		TRUE	-2.23768	1.0468e-05	7.60885e-05	Chromosome_II	2050456	2050932	477	+	6.66479	121.806	129.377	133.143	283.79	199.357	228.433	213.085	213.441	194.238	60.5401	21.7695	50.02	47.1332	61.0465	55.3331	37.0796	21.3041	54.2426	193.907	215.359	225.142	10.5222	11.2094	11.6504	32.0511	21.6101	23.4409	21.27	19.4445
pgaptmp_002852	pgaptmp_002852	pgaptmp_002852	protein_coding	protein_coding	pgaptmp_002852	0.4455	1266				TRUE	1.92179	1.04869e-05	7.60885e-05	Chromosome_I	3099241	3100506	1266	-	11.3882	1874.11	1662.54	1906.48	1687.36	2013.37	1842.31	1839.81	1992.62	1841.03	3929.05	3775.19	3753.35	3811.9	3282.08	3231.71	6047.34	5287.41	9202.71	1668.61	1733.71	2022.95	60.9987	54.2725	62.8551	71.8024	82.2306	71.2298	69.1945	68.3954
pgaptmp_002863	pgaptmp_002863	cpdA	protein_coding	protein_coding	pgaptmp_002863	0.4597	807		GO:0004115		TRUE	1.34991	1.04895e-05	7.60885e-05	Chromosome_I	3112443	3113249	807	-	11.9671	3852.3	3083.93	3363.71	2795.62	2502.89	1992.4	2444.91	2682.19	2904.42	4377.05	4001.95	3866.36	6592.76	9132.56	9234.03	7008.04	7111.57	8598.11	2658.82	2930.29	3343.9	196.7	157.933	173.975	186.624	160.366	120.847	144.252	144.429
pgaptmp_004805	pgaptmp_004805	pgaptmp_004805	protein_coding	protein_coding	pgaptmp_004805	0.4658	732				TRUE	-1.5354	1.05099e-05	7.61319e-05	Chromosome_II	1731082	1731813	732	+	6.6314	94.8235	128.497	87.4009	172.324	148.835	110.506	138.097	127.617	128.084	86.7742	58.0519	75.9562	57.4436	125.423	104.079	35.3941	54.5917	48.9506	150.32	147.821	160.341	5.33781	7.25477	4.98363	12.6823	10.5133	7.38935	8.98268	7.57591
pgaptmp_003368	pgaptmp_003368	pgaptmp_003368	protein_coding	protein_coding	pgaptmp_003368	0.4508	792		GO:0003677		TRUE	2.03019	1.05593e-05	7.63839e-05	Chromosome_II	104219	105010	792	-	6.84023	82.4887	40.4854	45.7425	76.2324	69.6384	51.9541	68.3061	116.422	99.2301	102.918	81.6355	101.893	297.529	415.116	350.443	264.613	260.975	439.232	59.7927	80.2818	77.2627	4.29168	2.11259	2.41066	5.18536	4.5464	3.21091	4.10645	6.38777
pgaptmp_001468	pgaptmp_001468	pgaptmp_001468	protein_coding	protein_coding	pgaptmp_001468	0.4771	807		GO:0051073		TRUE	1.36057	1.06402e-05	7.68639e-05	Chromosome_I	1519663	1520469	807	+	8.38795	327.642	309.801	303.044	219.088	245.1	220.187	253.92	253.741	252.65	381.403	576.891	450.18	609.786	485.042	465.061	537.654	474.016	588.73	222.965	172.032	213.511	16.7296	15.8654	15.6738	14.6255	15.7041	13.3552	14.9816	13.6633
pgaptmp_005211	pgaptmp_005211	pgaptmp_005211	protein_coding	protein_coding	pgaptmp_005211	0.4417	840				TRUE	1.12875	1.07205e-05	7.73377e-05	Chromosome_II	2182309	2183148	840	+	8.22529	185.792	171.623	154.381	196.026	164.538	197.92	160.371	173.141	175.94	760.787	683.924	1100.44	530.249	446.194	604.711	436.528	436.734	472.307	191.113	207.713	203.541	9.11395	8.44379	7.67106	12.5718	10.1282	11.5331	9.09031	8.95691
pgaptmp_001261	pgaptmp_001261	pgaptmp_001261	protein_coding	protein_coding	pgaptmp_001261	0.42	600		GO:0000287,GO:0010945		TRUE	-1.47841	1.08361e-05	7.80645e-05	Chromosome_I	1347734	1348333	600	-	8.50737	588.985	763.941	754.752	681.608	548.914	591.287	699.395	519.423	522.893	201.8	143.316	113.008	151.71	245.296	191.031	234.276	190.405	191.833	695.16	557.513	510.931	40.4493	52.62	52.5042	61.1994	47.3039	48.237	55.5014	37.619
pgaptmp_001094	pgaptmp_001094	pgaptmp_001094	protein_coding	protein_coding	pgaptmp_001094	0.4614	1218				TRUE	1.40028	1.08592e-05	7.80662e-05	Chromosome_I	1163045	1164262	1218	+	10.7208	2598.01	2474.89	2357.37	1488.13	1544.33	1543.78	1813.08	1918.73	1744.62	799.129	810.912	831.813	1820.52	1634.94	1782.52	3268.06	3142.35	3370.98	967.859	1355.23	1379.1	87.8925	83.975	80.7834	65.8202	65.5598	62.0399	70.8766	68.4549
pgaptmp_001592	pgaptmp_001592	pgaptmp_001592	protein_coding	protein_coding	pgaptmp_001592	0.4384	552				TRUE	-1.52206	1.0866e-05	7.80662e-05	Chromosome_I	1659680	1660231	552	+	8.6867	692.289	845.792	953.242	603.453	448.553	575.619	832.295	616.442	661.534	234.088	163.271	203.785	212.1	350.74	287.205	173.6	237.008	187.864	680.631	558.787	535.023	51.6781	63.3237	72.0783	58.8937	42.0164	51.0421	71.7911	48.5278
pgaptmp_003682	pgaptmp_003682	phnX	protein_coding	protein_coding	pgaptmp_003682	0.4975	816	GO:0019700	GO:0050194		TRUE	1.63058	1.09282e-05	7.8406e-05	Chromosome_II	438364	439179	816	-	4.72655	7.70923	16.7222	8.98514	22.4213	15.02	14.844	17.0765	8.20928	19.0015	64.5761	50.7954	31.494	44.1874	49.9471	42.1585	82.5863	66.5753	68.7954	21.7936	14.0175	15.7848	0.389295	0.846926	0.459595	1.48025	0.951755	0.890419	0.996419	0.437172
pgaptmp_003114	pgaptmp_003114	gspG	protein_coding	protein_coding	pgaptmp_003114	0.4595	444	GO:0015628		GO:0015627	TRUE	1.50704	1.11017e-05	7.95422e-05	Chromosome_I	3369190	3369633	444	-	12.4097	3865.41	4395.3	4994.1	3424.05	3359.03	5112.95	4543.84	3945.68	3878.42	6685.65	7183.92	5980.16	5355.51	5013.58	5259.28	14135.7	10658.7	14096.4	5056.11	4457.55	4164.71	358.732	409.117	469.478	415.453	391.178	563.665	487.273	386.168
pgaptmp_000844	pgaptmp_000844	pgaptmp_000844	protein_coding	protein_coding	pgaptmp_000844	0.4675	1587				TRUE	1.24564	1.12036e-05	8.0163e-05	Chromosome_I	891420	893006	1587	-	10.8319	1572.68	1271.77	1332.25	1039.71	1303.33	1056.4	787.005	997.054	1042.27	3246.97	3796.96	3644.05	3020.95	3092.28	3483.35	2898.95	3187.63	3202.96	1190.82	1192.76	1536.95	40.834	33.1187	35.0389	35.2938	42.4641	32.5825	23.612	27.301
pgaptmp_000636	pgaptmp_000636	acnB	protein_coding	protein_coding	pgaptmp_000636	0.4681	2589	GO:0006099	GO:0003994,GO:0051539	GO:0005829	TRUE	1.53113	1.12546e-05	8.04187e-05	Chromosome_I	647251	649839	2589	+	11.7854	4364.96	3548.63	3192.99	2326.05	2971.92	1707.89	1882.87	3776.27	3189.44	3642.5	4147.08	3973.81	6127.32	5396.51	5765.18	6074.31	5583	6723.43	1720.02	2021.7	2632.75	69.4715	56.6462	51.4762	48.4006	59.3539	32.2894	34.6275	63.3823
pgaptmp_000237	pgaptmp_000237	pgaptmp_000237	protein_coding	protein_coding		0.5	1000				TRUE	2.1788	1.12814e-05	8.05002e-05	pgaptmp_000237	1	1000	1000	+	12.3579	1633.59	1468.03	1886.88	2388.19	2934.37	5399.93	1367.61	1385.88	1221.02	19665.4	23033.9	23505.7	12731.9	9602.06	10949.4	20562.3	16634.5	14001.2	5099.14	3111.24	3066.41	67.3132	60.6706	78.7563	128.657	151.726	264.314	65.1169	60.2229
pgaptmp_002557	pgaptmp_002557	pgaptmp_002557	protein_coding	protein_coding	pgaptmp_002557	0.4352	471				TRUE	-1.10207	1.1302e-05	8.05384e-05	Chromosome_I	2759840	2760310	471	-	9.42272	1669.82	1950.34	1892.6	1269.05	897.106	1448.94	2219.2	1629.17	1754.47	181.62	195.925	196.375	237.139	246.406	246.364	397.763	415.43	439.232	890.743	947.453	888.105	146.085	171.132	167.717	145.151	98.4843	150.579	224.341	150.308
pgaptmp_001667	pgaptmp_001667	pgaptmp_001667	protein_coding	protein_coding	pgaptmp_001667	0.4302	1353				TRUE	-1.2398	1.13244e-05	8.05889e-05	Chromosome_I	1753152	1754504	1353	-	11.6295	5096.57	6637.84	6238.14	4318.34	4660.99	4623.09	5331.59	5136.77	4810.9	1658.8	1518.42	1698.83	2026.73	1800.32	1955.1	1891.06	1627.1	1815.14	4642.59	4222.44	3776.73	155.217	202.755	192.441	171.943	178.125	167.251	187.625	164.979
pgaptmp_001715	pgaptmp_001715	pgaptmp_001715	protein_coding	protein_coding	pgaptmp_001715	0.4432	1038				TRUE	-1.21755	1.1604e-05	8.24669e-05	Chromosome_I	1811511	1812548	1038	+	12.9259	11069.7	11916.8	11570.4	9830.78	10277.1	8977.34	7753.48	8233.9	8216.39	9296.94	9540.47	9526.02	4433.47	4833.77	4649.29	4843.94	4168.94	4017.92	10455.9	9840.89	10088.2	439.436	474.464	465.256	510.217	511.939	423.334	355.658	344.704
pgaptmp_001474	pgaptmp_001474	btuD	protein_coding	protein_coding	pgaptmp_001474	0.4766	768	GO:0015889	GO:0005524		TRUE	1.23727	1.16873e-05	8.29465e-05	Chromosome_I	1525859	1526626	768	+	8.99965	499.558	463.822	526.039	354.897	370.039	317.497	336.333	352.999	344.138	583.203	580.519	516.873	910.261	950.106	941.98	782.042	825.534	908.893	307.346	381.02	367.205	26.803	24.9592	28.5889	24.8946	24.9133	20.2354	20.8517	19.9733
pgaptmp_000081	pgaptmp_000081	pgaptmp_000081	protein_coding	protein_coding	pgaptmp_000081	0.4919	1551				TRUE	1.41387	1.17632e-05	8.3373e-05	Chromosome_I	89008	90558	1551	-	9.37313	632.928	461.181	474.579	304.289	377.549	281.212	325.196	307.475	353.991	1004.97	925.202	965.2	1540.67	1931.29	1839.17	1109.02	1268.93	1471.16	459.901	416.701	559.116	16.8151	12.2886	12.7714	10.5691	12.5865	8.87472	9.98313	8.6146
pgaptmp_000851	pgaptmp_000851	pgaptmp_000851	protein_coding	protein_coding	pgaptmp_000851	0.4656	393				TRUE	-1.57184	1.17914e-05	8.34605e-05	Chromosome_I	898336	898728	393	+	7.90908	511.122	490.225	495.816	383.725	357.75	265.543	373.456	435.092	479.26	167.494	107.033	159.323	163.493	214.218	184.444	70.7883	98.5314	92.6092	231.906	286.721	320.682	53.5908	51.5519	52.6586	52.6007	47.0686	33.0731	45.2459	48.1089
pgaptmp_001471	pgaptmp_001471	pgaptmp_001471	protein_coding	protein_coding	pgaptmp_001471	0.4706	1800	GO:0006508	GO:0004222,GO:0008270		TRUE	1.21477	1.18543e-05	8.37232e-05	Chromosome_I	1521708	1523507	1800	+	9.59707	967.508	845.792	749.851	503.518	576.224	407.386	541.251	814.211	709.39	928.282	1044.93	1168.98	1422.83	1123.26	1190.98	994.407	1011.94	1090.14	428.049	386.754	510.1	22.1483	19.4193	17.3877	15.0698	16.5525	11.0781	14.3172	19.6563
pgaptmp_002914	pgaptmp_002914	leuB	protein_coding	protein_coding	pgaptmp_002914	0.4716	1092	GO:0009098	GO:0003862		TRUE	1.11156	1.18604e-05	8.37232e-05	Chromosome_I	3172247	3173338	1092	+	9.50327	941.297	837.871	910.766	549.002	503.854	420.581	590.996	705.998	712.205	472.213	613.173	465	994.217	1344.13	1350.39	1060.14	1151.75	1151	469.401	519.92	558.285	35.5191	31.71	34.8117	27.0841	23.8576	18.8521	25.7688	28.0943
pgaptmp_004087	pgaptmp_004087	pgaptmp_004087	protein_coding	protein_coding	pgaptmp_004087	0.4167	264				TRUE	-1.92143	1.18815e-05	8.37595e-05	Chromosome_II	893526	893789	264	-	8.00793	262.885	352.927	312.846	591.282	419.879	606.131	659.302	417.18	497.558	119.062	83.4496	109.303	89.8477	122.093	101.444	187.083	142.471	107.162	701.307	498.257	523.392	41.0317	55.2487	49.4616	120.658	82.2363	112.382	118.909	68.6685
pgaptmp_004279	pgaptmp_004279	pgaptmp_004279	protein_coding	protein_coding	pgaptmp_004279	0.413	828				TRUE	-2.17574	1.19036e-05	8.38035e-05	Chromosome_II	1131000	1131827	828	+	7.83748	530.395	745.459	720.445	456.113	487.469	515.418	617.724	618.681	629.865	94.8462	112.476	85.2192	75.1186	78.8055	93.5392	45.5068	55.9232	91.2862	365.462	342.153	265.019	26.3953	37.2079	36.3171	29.6761	30.4411	30.4693	35.522	32.4694
pgaptmp_002627	pgaptmp_002627	pgaptmp_002627	protein_coding	protein_coding	pgaptmp_002627	0.4514	627				TRUE	1.56123	1.19314e-05	8.38864e-05	Chromosome_I	2842312	2842938	627	-	5.50881	30.8369	43.1257	25.3218	34.5929	33.4537	15.6687	31.1832	23.1352	28.1504	64.5761	68.9366	61.1355	83.9561	84.3552	122.523	94.3844	111.846	74.0874	27.9405	24.212	24.9234	2.02657	2.84257	1.68565	2.97224	2.75881	1.2232	2.36802	1.60341
pgaptmp_003796	pgaptmp_003796	tdh	protein_coding	protein_coding	pgaptmp_003796	0.469	1032	GO:0006567	GO:0008743		TRUE	1.56719	1.19727e-05	8.3963e-05	Chromosome_II	552557	553588	1032	+	11.0153	1424.67	1180.24	1167.25	1352.97	1448.75	1230.41	1659.39	2088.14	1926.89	2078.54	2360.17	2630.68	2829.47	3092.28	3346.33	3986.06	4238.18	5658.42	1362.94	1499.87	1828.55	56.8842	47.2641	47.2091	70.6271	72.5869	58.3581	76.56	87.9261
pgaptmp_000946	pgaptmp_000946	mnmC	protein_coding	protein_coding	pgaptmp_000946	0.4656	2019	GO:0008033	GO:0004808		TRUE	1.01147	1.19742e-05	8.3963e-05	Chromosome_I	993820	995838	2019	-	10.6455	1632.81	1501.48	1408.22	1083.27	1278.07	981.356	868.675	1228.41	1184.43	2449.86	2574.24	2799.26	2540.78	2164.38	2364.83	2241.63	2219.62	2186.9	1109.8	1045.58	1137.34	33.3241	30.7344	29.1121	28.9044	32.7312	23.7916	20.4858	26.4389
pgaptmp_003949	pgaptmp_003949	pgaptmp_003949	protein_coding	protein_coding	pgaptmp_003949	0.4444	1287				TRUE	-1.1189	1.19907e-05	8.39668e-05	Chromosome_II	717231	718517	1287	-	10.522	1163.32	1554.29	1442.52	2118.49	2087.1	2279.38	2325.38	2100.08	2000.79	1128.06	1122.94	1174.54	1581.91	1337.47	1425.49	771.929	788.251	850.682	1866.98	1771.3	1639.13	37.246	49.9108	46.7827	88.6773	83.8512	86.6905	86.0295	70.908
pgaptmp_000751	pgaptmp_000751	glpQ	protein_coding	protein_coding	pgaptmp_000751	0.4593	1056	GO:0006629	GO:0008081		TRUE	1.62451	1.20466e-05	8.42461e-05	Chromosome_I	789148	790203	1056	+	8.73395	925.878	859.874	893.613	465.082	423.292	402.438	394.245	458.227	444.776	393.511	542.422	329.761	380.012	341.86	268.761	487.091	544.586	769.98	181.054	195.607	191.911	36.1284	33.6521	35.3205	23.7263	20.7262	18.6538	17.776	18.8562
pgaptmp_003647	pgaptmp_003647	pgaptmp_003647	protein_coding	protein_coding	pgaptmp_003647	0.4598	609				TRUE	-1.74219	1.21298e-05	8.47151e-05	Chromosome_II	403468	404076	609	-	6.83932	127.202	128.497	124.158	180.011	195.261	178.953	212.343	200.008	246.316	62.5581	59.866	44.4622	98.6852	77.6955	92.2218	38.765	66.5753	47.6276	167.084	204.528	209.357	8.60668	8.72002	8.50941	15.9238	16.5783	14.3832	16.6017	14.2714
pgaptmp_002898	pgaptmp_002898	pgaptmp_002898	protein_coding	protein_coding	pgaptmp_002898	0.4594	690	GO:0006355	GO:0003677		TRUE	-1.56186	1.23228e-05	8.59489e-05	Chromosome_I	3151126	3151815	690	-	8.41971	734.689	792.105	700.841	493.269	522.288	453.568	645.195	721.67	686.869	153.368	195.925	161.175	235.666	220.877	155.46	126.408	131.819	177.281	383.344	503.354	458.591	43.8746	47.4434	42.3947	38.5122	39.1386	32.1755	44.522	45.4493
pgaptmp_002653	pgaptmp_002653	pgaptmp_002653	protein_coding	protein_coding	pgaptmp_002653	0.4653	576	GO:0055085			TRUE	-1.35695	1.24064e-05	8.64175e-05	Chromosome_I	2872003	2872578	576	+	8.9112	625.218	806.187	808.663	643.812	663.613	715.812	722.411	649.279	684.054	286.557	239.464	322.351	188.533	192.019	238.459	370.796	351.518	300.319	1025.42	847.419	788.412	44.7268	57.8436	58.5984	60.2144	59.5712	60.8288	59.7165	48.9831
pgaptmp_003881	pgaptmp_003881	pgaptmp_003881	protein_coding	protein_coding	pgaptmp_003881	0.4947	936				TRUE	-1.8424	1.24915e-05	8.68955e-05	Chromosome_II	648069	649004	936	-	7.50873	328.413	321.243	382.277	319.023	271.044	245.751	472.203	473.153	466.593	64.5761	48.9813	53.7251	66.2811	58.8266	59.2854	97.7553	126.493	92.6092	291.14	447.284	475.207	14.4578	14.184	17.0468	18.3616	14.9729	12.8515	24.0207	21.9666
pgaptmp_004169	pgaptmp_004169	pgaptmp_004169	protein_coding	protein_coding	pgaptmp_004169	0.3599	489				TRUE	-1.51978	1.25222e-05	8.69935e-05	Chromosome_II	1009540	1010028	489	+	7.70728	184.251	234.991	229.529	377.318	294.939	347.185	389.048	349.267	396.92	153.368	88.892	96.3347	108.996	126.533	133.063	141.577	113.178	117.746	448.725	343.428	324.005	15.5259	19.8602	19.5916	41.5684	31.1866	34.7525	37.8815	31.0375
pgaptmp_001600	pgaptmp_001600	pgaptmp_001600	protein_coding	protein_coding	pgaptmp_001600	0.4229	882				TRUE	-1.11052	1.26655e-05	8.78734e-05	Chromosome_I	1668360	1669241	882	+	8.41324	504.183	506.067	610.989	528.502	473.814	545.106	526.402	552.26	543.302	167.494	137.873	179.701	253.341	220.877	250.316	207.309	197.063	201.094	422.46	473.408	445.299	23.5547	23.7127	28.9139	32.2807	27.7769	30.2514	28.4172	27.209
pgaptmp_001210	pgaptmp_001210	nrdB	protein_coding	protein_coding	pgaptmp_001210	0.4356	1134	GO:0009263	GO:0016491		TRUE	1.42332	1.26847e-05	8.78903e-05	Chromosome_I	1289132	1290265	1134	-	13.3581	8485.55	8574.1	7116.23	5556	5896.05	3988.1	6158.68	7671.2	7146.68	12741.7	10240.7	11971.4	22628.4	29336.7	26009.2	21696.6	21044.5	20621.4	7541.7	6727.11	9440.17	308.337	312.476	261.926	263.945	268.839	172.141	258.588	293.959
pgaptmp_003551	pgaptmp_003551	pgaptmp_003551	protein_coding	protein_coding	pgaptmp_003551	0.3553	228				TRUE	-1.52551	1.2747e-05	8.80398e-05	Chromosome_II	307468	307695	228	+	5.77502	74.0086	72.1696	80.0494	99.9349	75.1002	79.9929	115.081	80.6002	102.045	22.198	12.6989	27.7889	29.4583	38.8478	44.7934	30.3378	31.9561	22.4908	108.409	86.6534	99.6938	13.3754	13.0816	14.6543	23.6128	17.0314	17.1731	24.0326	15.3617
pgaptmp_002068	pgaptmp_002068	pgaptmp_002068	protein_coding	protein_coding	pgaptmp_002068	0.4887	3276				TRUE	1.19744	1.27478e-05	8.80398e-05	Chromosome_I	2232433	2235708	3276	-	12.7853	6140.4	6057.84	6348.41	4021.1	4704.69	4195.09	4059.76	4668.84	4295.75	10320.1	10781.3	10948.8	14930.9	15057.4	15428.7	9639.01	10253.9	11224.2	4320.16	4516.17	4761.21	77.2344	76.4216	80.8839	66.1249	74.2559	62.6802	59.005	61.9302
pgaptmp_004853	pgaptmp_004853	pgaptmp_004853	protein_coding	protein_coding	pgaptmp_004853	0.4736	870				TRUE	-1.79784	1.27688e-05	8.80398e-05	Chromosome_II	1776450	1777319	870	+	9.04309	417.069	317.722	345.519	772.574	871.163	447.795	356.38	579.127	561.6	819.309	952.414	724.363	428.618	437.315	403.141	244.388	287.605	310.902	761.099	930.887	1329.25	19.7536	15.0928	16.5766	47.8393	51.7755	25.1937	19.5041	28.9262
pgaptmp_003115	pgaptmp_003115	gspF	protein_coding	protein_coding	pgaptmp_003115	0.4709	1221	GO:0015628		GO:0015627	TRUE	1.4233	1.27732e-05	8.80398e-05	Chromosome_I	3369694	3370914	1221	-	11.6651	2934.9	2729.24	2756.8	1787.3	2452.36	2168.88	2317.95	2523.23	2447.68	3632.41	4693.13	4222.05	4999.07	3941.38	4064.35	5636.1	5614.96	7683.92	2358.18	2195.64	2516.44	99.0458	92.3779	94.2391	78.858	103.852	86.9465	90.3902	89.8006
pgaptmp_003843	pgaptmp_003843	pgaptmp_003843	protein_coding	protein_coding	pgaptmp_003843	0.4625	867	GO:0006355	GO:0003677,GO:0003700		TRUE	-1.17637	1.28024e-05	8.81254e-05	Chromosome_II	611364	612230	867	+	7.71662	191.189	188.345	226.262	321.585	286.064	230.907	327.424	317.923	353.991	108.972	134.245	159.323	120.779	139.852	169.952	139.891	158.449	141.56	319.081	342.153	371.359	9.08661	8.97794	10.8927	19.9821	17.0603	13.0362	17.9814	15.9346
pgaptmp_004301	pgaptmp_004301	pgaptmp_004301	protein_coding	protein_coding	pgaptmp_004301	0.4444	1755				TRUE	-1.22465	1.28494e-05	8.82315e-05	Chromosome_II	1156874	1158628	1755	+	10.3667	1046.14	1167.03	1153.37	2246.61	2131.48	2181.25	1504.96	1440.35	1518.71	1132.1	983.254	1228.27	1132.67	1159.88	1345.12	682.601	826.865	826.868	1964.22	1840.11	1705.59	24.5625	27.482	27.4303	68.9629	62.7984	60.836	40.8301	35.664
pgaptmp_004878	pgaptmp_004878	pgaptmp_004878	protein_coding	protein_coding	pgaptmp_004878	0.4512	1332				TRUE	-1.58162	1.28514e-05	8.82315e-05	Chromosome_II	1810983	1812314	1332	-	6.96697	84.0306	106.494	99.6534	160.793	168.634	178.128	161.856	138.065	163.272	94.8462	119.732	100.04	98.6852	94.3446	105.396	60.6757	86.5479	74.0874	267.67	247.854	203.541	2.59951	3.30418	3.12269	6.50319	6.54614	6.54579	5.78571	4.50419
pgaptmp_002260	pgaptmp_002260	xthA	protein_coding	protein_coding	pgaptmp_002260	0.4535	807	GO:0006281	GO:0003677,GO:0004519,GO:0008311		TRUE	-1.05727	1.28852e-05	8.83482e-05	Chromosome_I	2450826	2451632	807	+	11.8192	4071.24	5124.04	5083.96	4244.67	3483.29	4026.86	4402.77	4085.98	3976.94	2944.27	2692.16	3036.4	3278.71	3031.24	2970.86	2389.95	2243.59	2475.31	4993.53	4883.81	4979.7	207.88	262.41	262.948	283.358	223.182	244.245	259.768	220.019
pgaptmp_001532	pgaptmp_001532	pgaptmp_001532	protein_coding	protein_coding	pgaptmp_001532	0.4119	471				TRUE	-1.67405	1.30382e-05	8.92809e-05	Chromosome_I	1590531	1591001	471	+	9.26115	1110.13	1357.14	1453.96	1332.47	1374.33	1845.61	1876.19	1737.38	1656.65	278.484	212.252	257.51	313.731	207.558	216.062	202.252	280.948	181.249	764.452	791.987	626.409	97.1204	119.082	128.846	152.405	150.874	191.801	189.666	160.292
pgaptmp_002813	pgaptmp_002813	gltB	protein_coding	protein_coding	pgaptmp_002813	0.4908	4464	GO:0006537,GO:0008152	GO:0003824,GO:0015930,GO:0016491		TRUE	1.27886	1.31463e-05	8.99046e-05	Chromosome_I	3052098	3056561	4464	+	11.5977	3287.99	3359.41	3636.53	2123.62	2085.74	2112.8	2037.3	2035.9	2008.53	3396.3	3194.67	3084.56	6253.99	7073.62	6087.95	4407.41	4709.54	4959.89	2077.1	2056.11	1658.24	30.3504	31.1014	34.002	25.6281	24.159	23.1669	21.7302	19.8185
pgaptmp_002377	pgaptmp_002377	pgaptmp_002377	protein_coding	protein_coding	pgaptmp_002377	0.4669	726				TRUE	-1.02936	1.31737e-05	8.99749e-05	Chromosome_I	2590575	2591300	726	+	10.402	1527.97	1717.11	1647.55	1826.38	1480.16	1359.88	1271.09	1120.94	1247.06	1309.68	1144.71	1332.01	1119.41	1523.94	1396.5	933.731	850.832	874.496	1842.96	1709.49	1916.61	86.7234	97.7468	94.7201	135.524	105.418	91.6846	83.3626	67.0939
pgaptmp_004824	pgaptmp_004824	pgaptmp_004824	protein_coding	protein_coding	pgaptmp_004824	0.4559	783	GO:0006355	GO:0003700,GO:0043565		TRUE	-1.50036	1.32747e-05	9.05466e-05	Chromosome_II	1751528	1752310	783	-	8.39126	449.448	398.693	405.965	550.283	593.292	352.133	570.95	726.894	758.653	169.512	159.643	211.195	256.287	310.782	248.999	128.093	161.112	177.281	382.785	494.434	500.961	23.6524	21.0435	21.6405	37.8607	39.1787	22.013	34.7191	40.341
pgaptmp_005007	pgaptmp_005007	pgaptmp_005007	protein_coding	protein_coding	pgaptmp_005007	0.4706	1005				TRUE	1.11234	1.33889e-05	9.12079e-05	Chromosome_II	1959985	1960989	1005	+	8.39125	198.127	151.38	162.549	183.855	200.04	167.408	204.918	261.951	234.352	676.031	607.731	648.407	877.857	1145.45	1069.77	443.27	466.027	489.506	213.465	196.244	225.142	8.12337	6.22507	6.75088	9.85537	10.2919	8.15346	9.70839	11.3264
pgaptmp_001875	pgaptmp_001875	pgaptmp_001875	protein_coding	protein_coding	pgaptmp_001875	0.4528	879		GO:0001216		TRUE	-1.40754	1.34146e-05	9.1236e-05	Chromosome_I	2009390	2010268	879	+	6.50923	140.308	161.942	104.554	112.747	116.064	64.3242	117.308	98.5113	106.971	60.5401	78.0072	64.8407	76.5915	85.4651	89.5869	43.8213	41.2767	52.9196	124.615	131.892	157.018	6.57736	7.61397	4.96471	6.91004	6.82736	3.58194	6.35437	4.87006
pgaptmp_000634	pgaptmp_000634	mrcB	protein_coding	protein_coding	pgaptmp_000634	0.4686	2388	GO:0009252,GO:0046677	GO:0008233,GO:0008658,GO:0008955	GO:0009274	TRUE	1.32963	1.34278e-05	9.1236e-05	Chromosome_I	642187	644574	2388	+	11.0052	1801.65	1520.84	1643.46	1072.38	1254.86	1136.39	1256.24	1424.68	1422.3	3097.64	2683.09	2893.75	5688.39	5339.9	5659.78	2833.22	3041.16	3331.29	1033.24	1173.64	1458.02	31.088	26.3203	28.7254	24.1924	27.1709	23.2931	25.0478	25.9251
pgaptmp_005314	pgaptmp_005314	pgaptmp_005314	protein_coding	protein_coding	pgaptmp_005314	0.4524	966				TRUE	-1.35623	1.34845e-05	9.13312e-05	Chromosome_II	2299587	2300552	966	-	10.7235	1581.93	2118.44	2238.12	3061.47	2457.83	4040.88	4281.75	3595.66	3568.76	845.543	792.771	974.463	1067.86	923.467	922.218	965.755	794.909	906.247	2634.79	2286.76	1948.18	67.4791	90.6319	96.7045	170.733	131.558	204.753	211.046	161.748
pgaptmp_004823	pgaptmp_004823	pgaptmp_004823	protein_coding	protein_coding	pgaptmp_004823	0.4272	213				TRUE	-1.34048	1.35075e-05	9.13312e-05	Chromosome_II	1751295	1751507	213	+	6.44003	100.991	75.6901	98.0197	151.824	142.008	110.506	158.143	176.126	195.645	26.234	38.0966	72.251	54.4978	73.2558	65.8727	40.4505	45.2712	51.5966	120.144	133.803	137.91	19.5371	14.6859	19.2077	38.3995	34.4728	25.3944	35.3512	35.9321
pgaptmp_000744	pgaptmp_000744	pgaptmp_000744	protein_coding	protein_coding	pgaptmp_000744	0.4692	1185				TRUE	-1.65683	1.35276e-05	9.13312e-05	Chromosome_I	778911	780095	1185	+	9.81132	784.799	1102.79	1689.21	1242.78	1617.39	1687.27	1806.4	1873.95	1766.44	339.025	406.363	387.192	633.353	441.755	490.093	429.786	541.923	525.227	1251.18	1984.75	1557.72	27.2897	38.4605	59.4984	56.4989	70.5731	69.6947	72.5818	68.7192
pgaptmp_001929	pgaptmp_001929	serC	protein_coding	protein_coding	pgaptmp_001929	0.4539	1095	GO:0006564	GO:0003824,GO:0004648		TRUE	-1.19691	1.35284e-05	9.13312e-05	Chromosome_I	2079154	2080248	1095	-	12.1501	5993.92	7974.74	8359.45	5805.19	4829.63	5738.87	7277.57	6610.71	6279.65	2881.71	2632.29	2893.75	3534.99	3805.97	3507.06	2607.37	2762.87	2234.53	5920.59	6051.72	5520.54	225.557	300.984	318.643	285.606	228.057	256.534	316.45	262.344
pgaptmp_004652	pgaptmp_004652	modF	protein_coding	protein_coding	pgaptmp_004652	0.4375	1449		GO:0005524		TRUE	-1.11537	1.35286e-05	9.13312e-05	Chromosome_II	1562610	1564058	1449	+	8.66122	615.196	598.479	564.43	784.105	673.854	584.69	893.919	967.202	934.593	215.926	212.252	183.407	209.154	205.338	208.158	239.332	207.715	224.908	473.871	480.417	536.685	17.4946	17.0696	16.2586	29.1521	24.0459	19.751	29.3739	29.0059
pgaptmp_003002	pgaptmp_003002	pgaptmp_003002	protein_coding	protein_coding	pgaptmp_003002	0.4725	546		GO:0042834		TRUE	-1.04179	1.35544e-05	9.13883e-05	Chromosome_I	3250010	3250555	546	+	11.3633	2811.56	3538.07	3732.1	3055.06	2733.65	3497.42	3661.06	3136.69	3008.57	1892.89	1873.99	2050.82	2579.07	2320.88	2476.81	1675.32	1691.01	1534.67	3426.07	3419.62	3290.73	212.184	267.803	285.3	301.434	258.877	313.536	319.262	249.641
pgaptmp_000750	pgaptmp_000750	glpT	protein_coding	protein_coding	pgaptmp_000750	0.4686	1368	GO:0015794	GO:0015169	GO:0016020	TRUE	2.26096	1.3681e-05	9.21237e-05	Chromosome_I	787727	789094	1368	+	9.45868	1743.83	1811.28	1674.5	811.01	785.139	1042.38	882.039	850.78	838.881	433.871	741.976	327.909	649.555	437.315	403.141	896.652	969.336	1760.9	215.142	278.438	245.081	52.5262	54.7194	51.0906	31.9378	29.6759	37.2969	30.6997	27.0252
pgaptmp_002844	pgaptmp_002844	rsmI	protein_coding	protein_coding	pgaptmp_002844	0.4479	864	GO:0000451	GO:0008649,GO:0008757		TRUE	-1.16979	1.38696e-05	9.32739e-05	Chromosome_I	3092856	3093719	864	-	12.5099	7002.29	8408.64	8446.85	6802.62	6431.99	6865.37	7331.77	6701.75	6720.2	4054.17	4241.42	4475.86	4599.91	4552.96	4791.58	3616.94	3732.21	3894.88	9045.46	8448.71	7881.62	333.952	402.211	408.058	424.157	384.925	388.94	404.043	337.064
pgaptmp_003621	pgaptmp_003621	pgaptmp_003621	protein_coding	protein_coding	pgaptmp_003621	0.4779	429				TRUE	1.41134	1.40763e-05	9.45064e-05	Chromosome_II	371850	372278	429	-	8.08205	134.141	162.822	163.366	212.041	190.482	298.53	272.482	243.293	225.203	409.655	361.01	350.14	291.637	322.991	288.522	669.118	519.287	453.785	211.23	200.067	188.587	12.8843	15.6854	15.8945	26.6273	22.9583	34.0615	30.2422	24.6439
pgaptmp_000926	pgaptmp_000926	pgaptmp_000926	protein_coding	protein_coding	pgaptmp_000926	0.4739	555	GO:0017004	GO:0015036	GO:0030288	TRUE	1.43237	1.40888e-05	9.45064e-05	Chromosome_I	972171	972725	555	+	10.7914	2069.16	1648.46	1609.97	1103.77	1101.24	933.525	1121.11	1792.61	1504.64	2042.22	2037.26	2173.09	3281.65	3077.85	3236.98	2551.75	2806.81	3369.65	897.449	1080.62	1255.31	153.624	122.751	121.078	107.139	102.597	82.3314	96.1808	140.356
pgaptmp_003107	pgaptmp_003107	pgaptmp_003107	protein_coding	protein_coding	pgaptmp_003107	0.4882	762				TRUE	1.24282	1.41125e-05	9.45448e-05	Chromosome_I	3364053	3364814	762	-	10.2001	908.147	978.69	1022.67	620.75	744.858	775.188	821.158	906.006	779.062	1707.23	1610.94	1900.76	2160.76	1752.59	1812.82	1687.12	1979.95	2267.6	813.069	846.782	840.751	49.1088	53.0801	56.0173	43.886	50.5431	49.7949	51.3103	51.667
pgaptmp_003311	pgaptmp_003311	pgaptmp_003311	protein_coding	protein_coding	pgaptmp_003311	0.4307	267				TRUE	1.42802	1.41856e-05	9.49137e-05	Chromosome_II	48825	49091	267	+	10.5039	423.237	513.108	561.98	1143.49	782.408	1756.54	921.39	686.594	800.175	3287.33	2612.34	3249.44	1986.96	1654.92	1768.02	4801.81	3512.51	3232.06	1503.2	1407.48	1364.14	65.3176	79.4217	87.8517	230.719	151.519	322.018	164.31	111.745
pgaptmp_004684	pgaptmp_004684	pgaptmp_004684	protein_coding	protein_coding	pgaptmp_004684	0.477	174				TRUE	-2.33228	1.42644e-05	9.53196e-05	Chromosome_II	1598860	1599033	174	-	6.35354	275.99	226.19	228.713	229.338	223.935	117.928	208.631	254.488	283.615	40.3601	12.6989	33.3466	17.675	46.6173	39.5236	15.1689	23.9671	17.1989	81.5863	159.926	156.187	65.3586	53.7237	54.8633	71.0053	66.5453	33.1741	57.0902	63.5557
pgaptmp_002836	pgaptmp_002836	murD	protein_coding	protein_coding	pgaptmp_002836	0.4673	1314	GO:0008360,GO:0009252,GO:0051301	GO:0005524,GO:0008764	GO:0005737	TRUE	1.14432	1.43433e-05	9.57251e-05	Chromosome_I	3083479	3084792	1314	-	12.2758	4278.62	3652.49	4027.79	2597.67	3012.2	2990.25	2776.05	3207.59	3105.69	8183	8473.76	9355.58	9304.4	8536.52	9266.97	7131.08	8135.5	8079.49	3375.77	3462.31	3745.16	134.173	114.877	127.942	106.501	118.531	111.39	100.592	106.077
pgaptmp_000569	pgaptmp_000569	surE	protein_coding	protein_coding	pgaptmp_000569	0.4813	777		GO:0008252		TRUE	1.50008	1.45247e-05	9.68131e-05	Chromosome_I	578765	579541	777	+	10.4634	1391.52	1166.15	1115.79	572.704	754.416	630.047	691.97	950.037	845.215	2120.92	2242.25	2491.73	4158.04	3673.89	3999.79	2142.19	2250.24	2648.62	687.337	756.943	1042.63	73.7947	62.0264	59.9381	39.7076	50.2035	39.6903	42.4032	53.1321
pgaptmp_002714	pgaptmp_002714	pgaptmp_002714	protein_coding	protein_coding	pgaptmp_002714	0.4898	639				TRUE	1.2305	1.45627e-05	9.69435e-05	Chromosome_I	2938081	2938719	639	+	7.50305	201.211	179.544	184.604	129.403	159.759	93.1876	93.5496	94.7798	128.788	207.854	224.951	226.016	309.312	295.243	276.665	316.862	339.534	275.182	138.026	118.511	125.448	12.975	11.6121	12.0581	10.9096	12.9273	7.13822	6.97066	6.44544
pgaptmp_002765	pgaptmp_002765	ribF	protein_coding	protein_coding	pgaptmp_002765	0.4573	936		GO:0003919		TRUE	1.11756	1.46433e-05	9.73564e-05	Chromosome_I	2994655	2995590	936	-	12.8985	6137.32	5681.15	5698.21	4497.07	5148.46	5162.43	4190.43	4918.1	4732.08	14208.8	13821.8	16899.3	13519.9	12121.6	12460.5	11428.9	11581.4	11303.6	5298.64	5018.89	5526.36	270.185	250.843	254.099	258.832	284.41	269.967	213.165	228.328
pgaptmp_002980	pgaptmp_002980	rpsE	protein_coding	protein_coding	pgaptmp_002980	0.4683	504	GO:0006412	GO:0003735	GO:0015935	TRUE	2.25226	1.4677e-05	9.74575e-05	Chromosome_I	3236910	3237413	504	-	16.4573	102389	66460.3	52146.5	28449.4	39970.4	19393.7	27573.4	65886.2	53286.6	271105	259383	320637	271100	278424	288625	171217	182215	190098	30142.2	29748.9	55011	8371.03	5449.71	4318.52	3040.94	4100.64	1883.49	2604.91	5680.69
pgaptmp_004009	pgaptmp_004009	secF	protein_coding	protein_coding	pgaptmp_004009	0.4485	903	GO:0006886,GO:0043952	GO:0015450	GO:0031522	TRUE	-1.1535	1.47558e-05	9.7857e-05	Chromosome_II	777684	778586	903	+	10.8392	3037.44	2493.37	2172.77	3035.2	3393.85	2248.87	2283.06	4055.38	3582.84	1124.03	1333.38	1491.34	1028.09	930.127	1078.99	943.844	1022.6	1039.87	1964.22	2250.44	2533.88	138.605	114.114	100.431	181.077	194.334	121.902	120.382	195.156
pgaptmp_000004	pgaptmp_000004	gyrB	protein_coding	protein_coding	pgaptmp_000004	0.4835	2418	GO:0006265	GO:0003677,GO:0003918,GO:0005524	GO:0005694	TRUE	1.84446	1.48014e-05	9.80363e-05	Chromosome_I	3674	6091	2418	+	13.8718	13456.5	9501.74	8607.76	5673.23	7447.9	3555.15	4734.65	8639.14	8346.59	31836	31226.5	33646.8	55397.8	62863.5	62654.2	26021.4	29417	31541.4	6798.48	6683.14	10879.9	229.315	162.401	148.585	126.397	159.265	71.9671	93.2319	155.257
pgaptmp_002702	pgaptmp_002702	tgt	protein_coding	protein_coding	pgaptmp_002702	0.46	1137	GO:0006400	GO:0008479	GO:0005737	TRUE	1.2688	1.49266e-05	9.87406e-05	Chromosome_I	2924643	2925779	1137	-	12.9052	8796.23	8156.04	6976.55	4373.43	5354.65	3326.71	5137.8	7759.26	7791.32	11327.1	11917	13220.1	13007.3	10090.4	11955.9	10608.1	10443	11367.1	3913.35	4401.48	5177.43	318.782	296.456	256.107	207.217	243.509	143.215	215.154	296.55
pgaptmp_004137	pgaptmp_004137	ylqF	protein_coding	protein_coding	pgaptmp_004137	0.4582	945	GO:0042254	GO:0003924,GO:0005525	GO:0005737	TRUE	-1.17535	1.52162e-05	0.00010053	Chromosome_II	954593	955537	945	-	11.1877	2446.14	2453.77	2542.79	3372.8	2689.95	2310.72	3638.04	3891.2	3590.58	2169.35	2138.85	2273.13	1263.76	1502.85	1563.82	1457.9	1536.56	1329.6	2829.81	3357.82	3644.64	106.661	107.311	112.311	192.275	147.183	119.687	183.303	178.932
pgaptmp_003372	pgaptmp_003372	pgaptmp_003372	protein_coding	protein_coding	pgaptmp_003372	0.5067	1269				TRUE	1.64601	1.5253e-05	0.000100647	Chromosome_II	108219	109487	1269	-	4.20724	7.70923	8.80117	13.0693	7.6873	12.2891	10.7207	9.65194	17.9111	8.44511	38.3421	18.1412	11.1155	51.552	41.0676	47.4283	48.8776	41.2767	55.5655	7.26453	8.28305	13.2925	0.250327	0.286629	0.429864	0.326345	0.50073	0.413518	0.362148	0.613337
pgaptmp_003504	pgaptmp_003504	pgaptmp_003504	protein_coding	protein_coding	pgaptmp_003504	0.3333	546		GO:0022857	GO:0016020	TRUE	1.89322	1.5515e-05	0.000102247	Chromosome_II	254199	254744	546	+	4.7519	20.044	14.962	12.2525	17.2964	16.3855	27.2141	14.8491	17.9111	16.8902	24.216	23.5836	35.1992	42.7145	35.518	44.7934	74.1592	71.9013	111.131	20.1172	11.4688	18.2772	1.51269	1.1325	0.936638	1.70659	1.55171	2.43968	1.29492	1.4255
pgaptmp_000398	pgaptmp_000398	pgaptmp_000398	protein_coding	protein_coding	pgaptmp_000398	0.5024	822				TRUE	1.20085	1.56137e-05	0.000102769	Chromosome_I	433510	434331	822	+	10.5272	1318.28	1079.9	1168.88	762.324	920.319	741.377	882.039	1132.88	1103.49	2054.33	2035.44	2067.49	2741.09	2845.88	2964.27	2391.63	2335.46	2688.31	943.272	1035.38	1246.17	66.0835	54.2944	59.3528	49.9611	57.8909	44.1469	51.0915	59.8893
pgaptmp_003652	pgaptmp_003652	pgaptmp_003652	protein_coding	protein_coding	pgaptmp_003652	0.4523	1353				TRUE	1.82656	1.57129e-05	0.000103292	Chromosome_II	409699	411051	1353	+	7.92064	103.304	106.494	131.51	147.34	121.526	124.525	203.433	192.545	198.46	228.034	484.37	287.152	813.048	411.786	662.679	406.19	738.986	554.332	148.085	168.847	144.556	3.14613	3.25289	4.05696	5.86661	4.64424	4.50496	7.15908	6.18403
pgaptmp_003175	pgaptmp_003175	pgaptmp_003175	protein_coding	protein_coding	pgaptmp_003175	0.493	927				TRUE	1.37954	1.5789e-05	0.000103653	Chromosome_I	3441318	3442244	927	-	8.86299	611.342	450.62	485.198	327.992	372.77	257.297	351.925	467.182	482.779	407.637	509.768	435.359	533.195	503.911	529.616	884.854	888.114	855.974	257.611	347.251	393.79	27.1746	20.0896	21.8464	19.0611	20.7924	13.5859	18.076	21.9
pgaptmp_001897	pgaptmp_001897	pgaptmp_001897	protein_coding	protein_coding	pgaptmp_001897	0.4514	627				TRUE	-1.28131	1.58272e-05	0.000103653	Chromosome_I	2038632	2039258	627	-	8.21266	624.447	839.631	825.816	694.42	728.472	513.769	671.924	600.77	687.573	203.818	132.431	138.944	159.075	186.469	135.698	106.182	86.5479	105.839	271.023	261.235	231.788	41.038	55.343	54.9739	59.6649	60.0744	40.1082	51.0253	41.6369
pgaptmp_004156	pgaptmp_004156	tssF	protein_coding	protein_coding	pgaptmp_004156	0.4574	1749	GO:0033103	GO:0003674		TRUE	-1.70406	1.58443e-05	0.000103653	Chromosome_II	993116	994864	1749	+	5.9528	64.7575	59.8479	60.4455	85.2009	92.1685	67.6228	83.8977	102.243	109.083	34.3061	52.6095	44.4622	48.6062	43.2875	51.3807	38.765	25.2986	21.1678	97.233	118.511	120.463	1.52566	1.41417	1.4425	2.62433	2.72481	1.8925	2.28398	2.54027
pgaptmp_000836	pgaptmp_000836	rnhB	protein_coding	protein_coding	pgaptmp_000836	0.4726	639		GO:0003723,GO:0004523		TRUE	1.57255	1.58466e-05	0.000103653	Chromosome_I	882061	882699	639	+	10.0893	1192.62	859.874	864.207	538.111	738.03	429.652	492.992	761.97	686.166	1586.15	1919.34	2104.54	2252.09	1987.9	2036.78	2037.69	1989.27	2122.07	558.81	589.371	914.69	76.9057	55.6129	56.4492	45.3665	59.7197	32.9116	36.7343	51.8173
pgaptmp_002543	pgaptmp_002543	pgaptmp_002543	protein_coding	protein_coding		0.5	1000				TRUE	2.41528	1.60866e-05	0.000104952	pgaptmp_002543	1	1000	1000	+	11.5072	942.068	1035.9	1373.09	1324.14	1336.78	1919.83	996.378	994.069	857.883	11321	11303.8	13120	5326.06	5126.8	6448.94	12910.4	8935.74	7621.74	2481.68	1740.71	1262.79	38.8186	42.8113	57.3114	71.3341	69.1202	93.9713	47.4413	43.197
pgaptmp_002624	pgaptmp_002624	pgaptmp_002624	protein_coding	protein_coding	pgaptmp_002624	0.4731	1560				TRUE	1.44056	1.60932e-05	0.000104952	Chromosome_I	2838756	2840315	1560	-	12.4257	3251.75	3260.83	3233.83	3691.19	4479.39	4592.58	3283.89	3028.48	2827	6552.46	6623.36	6852.73	10678.6	9820.72	11212.8	10471.6	10700	14544.9	4205.61	4358.79	4625.79	85.8917	86.3864	86.5235	127.469	148.47	144.1	100.23	84.3601
pgaptmp_000821	pgaptmp_000821	map	protein_coding	protein_coding	pgaptmp_000821	0.4528	879	GO:0006508	GO:0070006		TRUE	-1.21791	1.61049e-05	0.000104952	Chromosome_I	866496	867374	879	-	13.2295	11000.3	12570.7	14028.3	10293.3	10135.1	10057.7	11695.2	11312.4	10762.6	8291.98	9420.73	9086.96	6874.09	7672.99	7807.23	6242.85	6058.35	5260.2	13700.9	14224.5	13011.7	515.672	591.034	666.125	630.856	596.189	560.068	633.506	559.246
pgaptmp_004297	pgaptmp_004297	pgaptmp_004297	protein_coding	protein_coding	pgaptmp_004297	0.4706	1749		GO:0004329,GO:0005524		TRUE	1.19072	1.61752e-05	0.000105279	Chromosome_II	1152184	1153932	1749	-	10.5793	874.226	684.731	725.346	873.149	1165.42	906.311	862.735	1026.91	1027.49	3024.99	3140.24	3219.8	3128.47	3001.27	3426.7	2255.11	2671	2616.87	1009.21	1030.28	1265.28	20.5964	16.1797	17.31	26.8945	34.4537	25.3641	23.4866	25.514
pgaptmp_002306	pgaptmp_002306	pgaptmp_002306	protein_coding	protein_coding	pgaptmp_002306	0.4299	1998				TRUE	-1.67376	1.62523e-05	0.00010565	Chromosome_I	2508486	2510483	1998	-	9.11607	1398.45	1681.9	1697.37	1191.53	1060.96	1030.84	1538.37	1269.45	1366.7	131.17	197.739	161.175	160.548	129.863	154.142	369.11	312.904	207.709	1017.03	963.382	913.029	28.841	34.7894	35.4587	32.1273	27.4567	25.2538	36.6605	27.6095
pgaptmp_002897	pgaptmp_002897	pgaptmp_002897	protein_coding	protein_coding	pgaptmp_002897	0.4323	1395	GO:0000160,GO:0016310	GO:0000155,GO:0004673,GO:0016772	GO:0016020	TRUE	-1.34811	1.63024e-05	0.000105845	Chromosome_I	3149739	3151133	1395	-	8.85555	890.416	917.962	842.153	741.825	709.356	485.73	602.875	666.444	748.8	278.484	232.208	229.721	256.287	286.364	299.062	219.107	250.323	309.579	632.014	716.802	685.395	26.3013	27.1952	25.1975	28.6478	26.2926	17.0433	20.5772	20.76
pgaptmp_001180	pgaptmp_001180	pgaptmp_001180	protein_coding	protein_coding	pgaptmp_001180	0.4683	1260				TRUE	1.29704	1.64042e-05	0.000106374	Chromosome_I	1258189	1259448	1260	-	12.6498	4838.31	5332.63	6113.16	3651.47	4103.89	5271.28	4524.53	4414.35	4176.11	8548.26	9716.44	10083.7	8463.36	6463.16	7929.75	11550.3	11532.2	14202.3	4763.86	5412.01	5021.24	158.227	174.909	202.505	156.121	168.41	204.776	170.976	152.242
pgaptmp_004527	pgaptmp_004527	pgaptmp_004527	protein_coding	protein_coding	pgaptmp_004527	0.4231	891		GO:0001216		TRUE	-2.15544	1.64542e-05	0.000106568	Chromosome_II	1407158	1408048	891	-	8.63817	521.144	890.678	934.454	775.136	855.46	1105.06	1079.53	913.469	956.409	143.278	148.758	185.259	150.237	127.643	148.872	124.722	147.797	185.218	913.096	742.288	480.192	24.1012	41.3128	43.7745	46.8667	49.6439	60.7071	57.6887	44.5506
pgaptmp_002615	pgaptmp_002615	pgaptmp_002615	protein_coding	protein_coding	pgaptmp_002615	0.4528	1473				TRUE	-1.90451	1.65038e-05	0.000106757	Chromosome_I	2824443	2825915	1473	+	13.4769	27845	24136.3	21943.3	16488.6	16648.4	6549.52	15914.6	23581.5	22235.3	6703.81	6592.52	6719.35	7762.26	9593.18	9249.84	3809.08	4344.7	5020.74	11584.7	17281	20818.6	778.936	677.189	621.786	603.04	584.403	217.64	514.428	695.675
pgaptmp_003450	pgaptmp_003450	pgaptmp_003450	protein_coding	protein_coding	pgaptmp_003450	0.4444	630				TRUE	-1.6487	1.6742e-05	0.000108165	Chromosome_II	199290	199919	630	+	7.09777	147.246	212.108	222.178	288.274	266.264	348.01	354.152	300.012	247.02	52.4681	65.3084	57.4303	41.2416	81.0254	67.1901	52.2485	67.9068	74.0874	248.112	243.394	177.787	9.63079	13.9142	14.7198	24.6507	21.8533	27.0386	26.7659	20.6936
pgaptmp_004255	pgaptmp_004255	pgaptmp_004255	protein_coding	protein_coding	pgaptmp_004255	0.4291	261	GO:0034258	GO:0034257	GO:0016020	TRUE	-1.35861	1.67713e-05	0.000108221	Chromosome_II	1104738	1104998	261	+	5.94184	55.5064	80.9708	93.1187	152.465	116.747	122.876	121.763	101.497	112.602	30.2701	47.1672	33.3466	29.4583	28.8583	32.9363	30.3378	30.6246	23.8138	91.6449	85.3791	82.2474	8.76317	12.8212	14.8915	31.4698	23.1285	23.044	22.213	16.8985
pgaptmp_005080	pgaptmp_005080	pgaptmp_005080	protein_coding	protein_coding	pgaptmp_005080	0.4566	357				TRUE	-1.54055	1.68013e-05	0.000108282	Chromosome_II	2041289	2041645	357	+	5.86922	171.916	168.982	164.183	96.0913	83.293	75.0448	297.725	282.847	244.205	18.162	10.8847	11.1155	14.7291	22.1987	15.8094	25.2815	18.6411	30.4287	87.1744	96.2108	84.7397	19.8429	19.5621	19.1956	14.5004	12.0638	10.2893	39.7082	34.4287
pgaptmp_000640	pgaptmp_000640	pgaptmp_000640	protein_coding	protein_coding	pgaptmp_000640	0.4349	1014				TRUE	-1.77279	1.69558e-05	0.000109014	Chromosome_I	652424	653437	1014	+	12.8499	7441.72	8156.04	8860.98	9769.92	8963.55	12774.1	7018.45	6635.33	6542.85	6427.34	5984.79	5894.94	4006.33	4738.32	4398.98	6013.63	4709.54	3880.33	20250.2	15036.3	14660	302.408	332.417	364.741	519.06	457.074	616.631	329.561	284.356
pgaptmp_004790	pgaptmp_004790	pgaptmp_004790	protein_coding	protein_coding	pgaptmp_004790	0.4074	135				TRUE	-1.68834	1.69563e-05	0.000109014	Chromosome_II	1715107	1715241	135	-	10.3389	666.077	967.248	744.133	1707.22	1233.69	2549.88	2124.17	1033.62	1277.32	1999.84	1378.73	1932.25	836.615	811.363	720.647	1061.82	900.098	592.699	2901.34	2756.34	2631.92	203.305	296.105	230.069	681.272	472.516	924.523	749.184	332.71
pgaptmp_000886	pgaptmp_000886	fliD	protein_coding	protein_coding	pgaptmp_000886	0.4913	2013	GO:0007155		GO:0009421	TRUE	1.84166	1.69925e-05	0.000109113	Chromosome_I	932669	934681	2013	+	12.5341	6077.95	4937.46	3892.2	2850.07	4535.37	2298.35	2725.56	6335.32	4946.73	12015.2	13351.9	14946.7	11995.4	8022.62	8538.42	11735.7	9741.3	10593.2	2271	2589.41	4120.68	124.415	101.368	80.7035	76.2738	116.497	55.8863	64.4681	136.761
pgaptmp_000548	pgaptmp_000548	rpoE	protein_coding	protein_coding	pgaptmp_000548	0.456	579	GO:0006352,GO:0006355	GO:0003677,GO:0003700,GO:0016987		TRUE	-1.02044	1.70283e-05	0.000109209	Chromosome_I	555207	555785	579	+	11.848	4662.54	4929.53	5218.73	4491.31	5032.4	3890.79	4770.29	5163.63	4879.87	2928.12	3200.11	3353.19	2527.52	2608.35	2495.26	2184.32	2379.4	2290.09	4743.74	4539.11	4684.78	331.82	351.859	376.207	417.887	449.408	328.921	392.282	387.538
pgaptmp_001558	pgaptmp_001558	pgaptmp_001558	protein_coding	protein_coding	pgaptmp_001558	0.4396	207				TRUE	-2.52056	1.71006e-05	0.00010954	Chromosome_I	1616767	1616973	207	-	7.16183	449.448	518.389	531.757	320.945	258.072	324.919	602.133	351.506	410.996	52.4681	32.6542	48.1674	35.3499	38.8478	38.2062	30.3378	65.2438	27.7828	323.551	305.836	211.018	89.4679	103.497	107.222	83.5265	64.4635	76.8313	138.502	73.7905
pgaptmp_000236	pgaptmp_000236	pgaptmp_000236	protein_coding	protein_coding		0.5	1000				TRUE	1.93481	1.71826e-05	0.000109931	pgaptmp_000236	1	1000	1000	+	12.3432	1615.85	1569.25	2041.26	2874.41	2902.97	5684.44	1466.35	1461.25	1380.07	18846.1	21043.8	22097.7	12214.9	8618.66	9647.71	18098.2	14332.3	11823.6	4991.29	3334.24	3220.11	66.5825	64.8535	85.1999	154.851	150.102	278.241	69.8186	63.4983
pgaptmp_003857	pgaptmp_003857	pgaptmp_003857	protein_coding	protein_coding	pgaptmp_003857	0.4233	378		GO:0003677		TRUE	-1.55497	1.73203e-05	0.000110546	Chromosome_II	622531	622908	378	-	7.9775	269.052	298.36	301.411	433.692	509.999	408.211	435.08	426.136	458.851	147.314	174.156	161.175	256.287	180.92	205.523	85.9572	125.162	96.5782	270.464	368.277	323.174	29.3294	32.6204	33.2819	61.8093	69.7624	52.8598	54.8037	48.9885
pgaptmp_000288	pgaptmp_000288	pgaptmp_000288	protein_coding	protein_coding	pgaptmp_000288	0.4547	717		GO:0003677,GO:0140110		TRUE	-1.13252	1.73306e-05	0.000110546	Chromosome_I	302622	303338	717	+	12.7107	11035.8	13265.1	13611.7	11610.4	11021.3	10716.6	14163.1	14443.8	13272.9	2704.12	2795.56	2799.26	2719	2724.89	2694.19	4695.62	4018.48	4339.4	9969.17	9412.73	9313.06	634.222	764.599	792.379	872.352	794.8	731.593	940.529	875.389
pgaptmp_003791	pgaptmp_003791	pgaptmp_003791	protein_coding	protein_coding	pgaptmp_003791	0.4476	1374				TRUE	-1.51796	1.73417e-05	0.000110546	Chromosome_II	544371	545744	1374	+	7.48378	181.167	214.749	207.475	311.336	266.264	312.549	376.426	319.415	363.14	113.008	105.219	118.566	89.8477	102.114	85.6345	84.2718	86.5479	108.485	326.904	290.544	234.28	5.43313	6.45929	6.3026	12.2069	10.0201	11.1343	13.0444	10.102
pgaptmp_004754	pgaptmp_004754	folE	protein_coding	protein_coding	pgaptmp_004754	0.4664	654	GO:0046654	GO:0003934		TRUE	-1.15265	1.74228e-05	0.000110805	Chromosome_II	1674535	1675188	654	-	11.3729	1966.62	2264.54	2428.44	3707.84	3464.85	3715.96	2770.11	2362.78	2443.45	2583.04	2590.57	2849.28	2039.99	2480.71	2447.83	1837.12	1818.84	1807.2	4573.3	3990.52	3628.02	123.909	143.101	154.985	305.427	273.937	278.116	201.675	156.994
pgaptmp_000250	pgaptmp_000250	pgaptmp_000250	protein_coding	protein_coding	pgaptmp_000250	0.4604	1731				TRUE	1.10295	1.74409e-05	0.000110805	Chromosome_I	259918	261648	1731	+	11.8017	3483.8	3487.9	3734.55	2331.82	2498.79	2135.07	2432.29	2687.42	2534.94	4098.57	4203.32	4448.07	5725.22	5470.88	6043.16	5339.46	5559.04	5777.49	2316.27	2622.54	2837.95	82.9305	83.2739	90.0497	72.5707	74.6408	60.3736	66.9038	67.4646
pgaptmp_004441	pgaptmp_004441	dld	protein_coding	protein_coding	pgaptmp_004441	0.4605	1707	GO:0006089	GO:0016901		TRUE	-2.12195	1.74456e-05	0.000110805	Chromosome_II	1307857	1309563	1707	-	9.46224	1011.45	870.436	706.559	2085.82	2720.68	1184.22	2029.14	3496.41	3117.65	270.412	255.791	305.678	287.218	267.495	316.189	207.309	215.704	281.797	694.042	1046.21	1444.73	24.4157	21.0739	17.2765	65.8276	82.4114	33.9573	56.5992	89.0073
pgaptmp_002183	pgaptmp_002183	pgaptmp_002183	protein_coding	protein_coding	pgaptmp_002183	0.4414	981				TRUE	-1.11892	1.75419e-05	0.000111282	Chromosome_I	2363991	2364971	981	-	11.0689	3759.02	3206.27	3294.28	2447.77	2480.36	2291.75	2378.09	2597.86	2606.73	1759.7	2115.27	2004.5	820.413	986.733	931.44	1580.94	1709.65	1570.39	3451.21	3142.46	4037.6	157.893	135.074	140.163	134.42	130.734	114.349	115.423	115.076
pgaptmp_002427	pgaptmp_002427	odhB	protein_coding	protein_coding	pgaptmp_002427	0.4715	1209	GO:0006099	GO:0004149	GO:0045252	TRUE	2.3024	1.75828e-05	0.000111407	Chromosome_I	2640936	2642144	1209	-	10.6718	2170.92	1211.04	1104.36	647.015	819.958	357.082	636.286	1356.02	1194.98	2853.46	3127.55	2797.41	4054.93	4569.61	4356.82	3460.2	3079.77	5233.74	591.78	679.847	1113.25	73.9904	41.3975	38.1262	28.8305	35.0679	14.4569	25.0587	48.7392
pgaptmp_001419	pgaptmp_001419	pgaptmp_001419	protein_coding	protein_coding	pgaptmp_001419	0.4933	669				TRUE	1.19538	1.77239e-05	0.000112166	Chromosome_I	1469112	1469780	669	-	12.2697	2950.32	3506.39	4090.69	4117.19	3548.14	5299.32	3731.59	2869.52	2869.23	4770.56	5364.36	5381.78	5031.47	5616.28	6152.51	11740.7	10869.1	10594.5	5364.58	4584.98	4553.51	181.719	216.608	255.218	331.542	274.233	387.728	265.583	186.389
pgaptmp_003787	pgaptmp_003787	pgaptmp_003787	protein_coding	protein_coding	pgaptmp_003787	0.4578	474				TRUE	-1.46091	1.78278e-05	0.000112688	Chromosome_II	541304	541777	474	-	7.72843	226.651	235.871	228.713	289.555	265.582	256.472	317.029	261.951	345.546	177.584	154.2	174.144	178.223	196.459	172.586	80.9009	119.836	115.1	282.199	299.464	343.113	19.7033	20.5655	20.1397	32.9092	28.971	26.4847	31.8459	24.0148
pgaptmp_001881	pgaptmp_001881	pgaptmp_001881	protein_coding	protein_coding	pgaptmp_001881	0.4098	549				TRUE	-1.52791	1.79335e-05	0.00011322	Chromosome_I	2019353	2019901	549	+	10.2514	1462.44	2187.97	2394.13	2503.5	2098.03	2955.61	2206.58	1786.64	1868.48	730.517	787.329	741.036	592.111	602.695	604.711	593.273	583.2	525.227	2041.89	1623.48	1289.37	109.765	164.707	182.019	245.663	197.598	263.517	191.373	141.417
pgaptmp_001034	pgaptmp_001034	luxU	protein_coding	protein_coding	pgaptmp_001034	0.4435	345	GO:0000160	GO:0004672		TRUE	1.1058	1.7957e-05	0.000113233	Chromosome_I	1097810	1098154	345	+	9.13507	515.747	535.991	469.678	395.255	389.838	363.679	441.02	478.377	514.448	595.311	517.025	728.068	628.934	739.218	872.154	999.463	918.739	959.167	386.697	445.373	495.146	61.5993	64.2067	56.8227	61.7196	58.4265	51.5979	60.8656	60.2544
pgaptmp_003900	pgaptmp_003900	pgaptmp_003900	protein_coding	protein_coding	pgaptmp_003900	0.4341	1251				TRUE	-1.12839	1.80394e-05	0.00011356	Chromosome_II	667995	669245	1251	-	7.33358	159.581	159.301	146.213	260.087	290.843	240.803	285.104	242.547	261.095	149.332	146.944	111.155	75.1186	130.972	123.841	82.5863	86.5479	92.6092	198.936	196.882	211.018	5.25632	5.26263	4.8783	11.2002	12.0211	9.42188	10.8512	8.42511
pgaptmp_002857	pgaptmp_002857	zapG	protein_coding	protein_coding	pgaptmp_002857	0.4369	444				TRUE	-1.20843	1.80633e-05	0.00011356	Chromosome_I	3104035	3104478	444	+	12.107	5635.45	5991.84	7532	5932.04	5018.06	5131.09	6816.5	5910.68	6125.52	2542.68	2882.64	2302.77	2067.97	3227.69	3267.29	3468.63	2816.13	2844.43	7711.02	6591.39	6853.12	523.002	557.723	708.057	719.755	584.382	565.665	730.99	578.485
pgaptmp_000795	pgaptmp_000795	pgaptmp_000795	protein_coding	protein_coding	pgaptmp_000795	0.4328	744				TRUE	-1.47942	1.80737e-05	0.00011356	Chromosome_I	840584	841327	744	+	10.9506	1752.31	2234.62	2532.18	3171.01	2825.82	4350.95	2833.22	2327.7	2489.2	1216.86	1228.16	1280.14	1157.71	1044.45	1113.25	1358.46	1387.43	1160.26	4460.42	3506.91	2971.71	97.05	124.129	142.057	229.609	196.388	286.249	181.317	135.954
pgaptmp_003530	pgaptmp_003530	pgaptmp_003530	protein_coding	protein_coding	pgaptmp_003530	0.4832	921				TRUE	-1.15103	1.81188e-05	0.000113707	Chromosome_II	283158	284078	921	-	7.2926	124.119	117.056	122.525	297.242	256.024	228.433	206.403	172.395	192.83	84.7561	94.3343	146.355	97.2123	113.214	117.253	116.295	115.841	123.038	271.582	295.641	255.881	5.5531	5.2526	5.55271	17.3866	14.3736	12.1404	10.6706	8.13396
pgaptmp_001006	pgaptmp_001006	pgaptmp_001006	protein_coding	protein_coding	pgaptmp_001006	0.4526	1350				TRUE	-1.01267	1.81458e-05	0.000113741	Chromosome_I	1064379	1065728	1350	+	10.0212	1982.04	2174.77	2136.83	1431.12	1375.02	1153.71	1588.12	1570.96	1477.89	490.375	524.281	542.809	717.309	832.452	812.869	584.846	591.189	642.973	1171.27	1237.36	1301	60.4975	66.5765	66.0659	57.1092	52.6645	41.8308	56.012	50.5671
pgaptmp_003670	pgaptmp_003670	pgaptmp_003670	protein_coding	protein_coding	pgaptmp_003670	0.4686	414				TRUE	-1.2045	1.82154e-05	0.000114041	Chromosome_II	427874	428287	414	-	7.25828	158.81	175.143	164.183	237.666	234.176	188.024	237.586	280.608	280.096	98.8822	116.104	114.861	95.7394	99.8943	133.063	74.1592	82.5534	88.6403	201.73	184.776	217.665	15.8065	17.4838	16.5527	30.9265	29.2473	22.2304	27.3246	29.4535
pgaptmp_000631	pgaptmp_000631	dksA	protein_coding	protein_coding	pgaptmp_000631	0.4631	447	GO:0006355	GO:0008270,GO:0019899		TRUE	1.39595	1.8267e-05	0.000114228	Chromosome_I	638360	638806	447	-	13.6049	6978.39	8662.11	9347.81	8550.84	7854.12	14391.3	11922.4	9008.56	8926.49	13762.8	15135.2	15224.6	16857.5	15606.8	17842.3	26972	25481	22447.2	10969.4	8662.15	8844.5	643.289	800.862	872.858	1030.54	908.519	1575.89	1269.95	875.76
pgaptmp_004388	pgaptmp_004388	pgaptmp_004388	protein_coding	protein_coding	pgaptmp_004388	0.4626	441				TRUE	1.38463	1.82963e-05	0.000114276	Chromosome_II	1253796	1254236	441	-	6.29981	37.7752	62.4883	66.1633	64.0609	62.8111	68.4475	69.791	92.5409	80.2286	82.7381	116.104	79.6614	164.966	107.664	98.809	119.666	153.123	111.131	45.8224	43.9639	40.7083	3.52961	5.85601	6.26209	7.82561	7.36447	7.59717	7.53518	9.1187
pgaptmp_003169	pgaptmp_003169	pgaptmp_003169	protein_coding	protein_coding	pgaptmp_003169	0.4829	1377	GO:0055085	GO:0022857		TRUE	3.69319	1.8393e-05	0.000114711	Chromosome_I	3435843	3437219	1377	-	12.2608	2119.27	1791.92	1860.74	1794.99	1969.67	1455.54	2003.89	2178.44	2363.22	4603.07	6035.58	6120.96	13039.7	11254.8	16237.6	26587.7	27251.9	77593.3	2698.49	3264.79	4251.94	63.4176	53.7806	56.4018	70.2249	73.9613	51.7396	69.2904	68.7464
pgaptmp_004613	pgaptmp_004613	pgaptmp_004613	protein_coding	protein_coding	pgaptmp_004613	0.4658	891				TRUE	1.18685	1.84096e-05	0.000114711	Chromosome_II	1515390	1516280	891	-	7.45727	146.475	127.617	125.792	141.574	146.104	141.843	152.204	119.408	167.495	189.692	175.97	201.932	200.316	239.746	234.507	342.143	324.887	285.766	145.291	119.148	139.571	6.774	5.91933	5.89272	8.55996	8.47869	7.79225	8.13355	5.8236
pgaptmp_001452	pgaptmp_001452	pgaptmp_001452	protein_coding	protein_coding	pgaptmp_001452	0.3853	423				TRUE	-1.81183	1.84707e-05	0.000114735	Chromosome_I	1504437	1504859	423	-	6.70856	172.687	234.991	247.5	207.557	210.963	243.277	244.268	258.965	237.167	48.4321	41.7248	48.1674	38.2958	28.8583	32.9363	48.8776	47.9342	30.4287	207.319	166.298	137.91	16.822	22.959	24.4217	26.4339	25.7876	28.151	27.4954	26.6035
pgaptmp_004936	pgaptmp_004936	pgaptmp_004936	protein_coding	protein_coding	pgaptmp_004936	0.4043	141				TRUE	-2.98124	1.84828e-05	0.000114735	Chromosome_II	1866610	1866750	141	+	9.64991	1063.1	1076.38	1036.56	2231.24	2089.15	1097.63	796.657	903.02	956.409	496.429	415.434	324.203	606.84	1084.41	884.012	249.444	268.964	174.635	2559.35	2139.57	933.798	310.681	315.493	306.843	852.494	766.117	381.041	269.02	278.302
pgaptmp_001441	pgaptmp_001441	pgaptmp_001441	protein_coding	protein_coding	pgaptmp_001441	0.4385	789	GO:0006355	GO:0003677,GO:0003700		TRUE	-1.07835	1.84862e-05	0.000114735	Chromosome_I	1491928	1492716	789	+	10.2171	1605.06	1841.2	1859.92	1360.01	1247.35	1598.21	2069.23	1811.26	1841.03	712.355	671.225	813.287	952.975	801.374	718.012	723.052	768.279	766.011	1521.64	1768.11	1516.18	83.8249	96.4421	98.3918	92.8603	81.7437	99.1492	124.872	99.7568
pgaptmp_002966	pgaptmp_002966	pgaptmp_002966	protein_coding	protein_coding	pgaptmp_002966	0.4834	453				TRUE	1.13741	1.85008e-05	0.000114735	Chromosome_I	3228167	3228619	453	+	8.55947	398.567	417.175	423.935	259.446	286.746	291.108	285.846	248.517	269.54	397.547	351.94	398.307	570.018	453.964	555.966	645.522	655.101	570.208	292.258	291.181	252.558	36.2545	38.0594	39.0609	30.8542	32.7298	31.4549	30.0446	23.8394
pgaptmp_004347	pgaptmp_004347	pgaptmp_004347	protein_coding	protein_coding	pgaptmp_004347	0.4342	2172	GO:0055085	GO:0022857	GO:0019867	TRUE	-1.17631	1.86996e-05	0.000115832	Chromosome_II	1208721	1210892	2172	-	11.478	1796.25	1710.07	1846.85	5625.18	6395.81	4106.03	2473.13	2790.41	2810.11	2990.68	3753.42	2604.74	1640.83	1878.01	1420.22	2639.39	2199.65	2087.68	5042.14	4846.86	5839.56	34.0773	32.5383	35.4906	139.521	152.258	92.5326	54.2149	55.8271
pgaptmp_000978	pgaptmp_000978	pgaptmp_000978	protein_coding	protein_coding	pgaptmp_000978	0.4495	396				TRUE	-1.48716	1.87403e-05	0.000115947	Chromosome_I	1034375	1034770	396	-	11.2975	4169.15	4557.25	4279.38	4479.14	3180.84	3731.63	3648.44	2456.81	3046.57	1273.36	1121.13	841.076	1042.82	2117.76	1948.51	1331.49	1777.56	1832.34	5374.64	3927.44	4651.55	433.821	475.608	451.052	609.345	415.327	461.249	438.676	269.597
pgaptmp_001196	pgaptmp_001196	uvrY	protein_coding	protein_coding	pgaptmp_001196	0.4496	645	GO:0000160,GO:0006355	GO:0003677		TRUE	-1.22782	1.89048e-05	0.000116828	Chromosome_I	1275399	1276043	645	+	12.9481	10097.5	13051.3	14404	9841.67	10138.5	11793.6	13584.7	11474.3	11156	4901.73	5045.07	4885.28	6470.51	6518.66	6693.98	3849.53	4216.88	3986.17	10464.8	9469.43	8367.63	645.081	836.246	932.104	822.003	812.754	894.992	1002.82	773.045
pgaptmp_004711	pgaptmp_004711	betB	protein_coding	protein_coding	pgaptmp_004711	0.4928	1461	GO:0019285	GO:0008802,GO:0046872		TRUE	1.97436	1.90882e-05	0.000117823	Chromosome_II	1628137	1629597	1461	-	7.25789	74.7795	67.769	62.896	95.4507	120.16	62.6748	72.0184	147.021	127.38	191.71	266.676	190.817	265.124	329.651	321.459	439.899	351.518	497.444	83.8215	79.6447	147.879	2.10907	1.917	1.79686	3.5196	4.2526	2.09979	2.34707	4.37286
pgaptmp_000841	pgaptmp_000841	glnB	protein_coding	protein_coding	pgaptmp_000841	0.4543	339				TRUE	1.0712	1.9243e-05	0.000118639	Chromosome_I	889293	889631	339	+	9.80975	517.289	757.781	642.846	702.748	550.963	1444.82	977.816	629.129	660.126	1241.07	1137.45	1537.65	1144.45	770.296	754.901	1624.76	1552.54	1337.54	752.717	690.041	694.533	62.877	92.3816	79.1495	111.677	84.0362	208.616	137.338	80.645
pgaptmp_000889	pgaptmp_000889	pgaptmp_000889	protein_coding	protein_coding	pgaptmp_000889	0.4703	1467				TRUE	-1.05822	1.93162e-05	0.000118951	Chromosome_I	935697	937163	1467	+	12.9198	13451.8	14877.5	14206.3	9317.01	10634.2	7481.39	10859.9	11444.5	11121.5	4968.32	5763.46	5415.12	5059.46	4971.4	5240.83	4759.67	4419.27	4425.4	9177.34	9500.65	9744.24	377.841	419.123	404.196	342.145	374.816	249.623	352.476	339.003
pgaptmp_001269	pgaptmp_001269	tyrR	protein_coding	protein_coding	pgaptmp_001269	0.4537	1545	GO:0006355	GO:0008134		TRUE	1.0036	1.94504e-05	0.000119637	Chromosome_I	1357044	1358588	1545	+	11.9363	3304.17	3430.7	3159.5	2540.65	2950.07	2884.69	2575.58	3054.6	2806.59	6205.36	6131.73	6860.14	7005.18	5662.9	5983.88	5499.58	4982.5	5360.75	2595.11	2570.29	2742.41	88.1237	91.7689	85.3554	88.5893	98.7298	91.391	79.3743	85.9138
pgaptmp_000271	pgaptmp_000271	astA	protein_coding	protein_coding	pgaptmp_000271	0.4873	1020	GO:0006527	GO:0008791		TRUE	1.31959	1.96983e-05	0.00012102	Chromosome_I	286342	287361	1020	+	7.62997	292.18	179.544	175.619	166.558	248.514	100.61	142.552	395.538	288.541	143.278	219.509	183.407	304.893	255.285	227.92	257.872	255.649	313.548	90.5272	103.857	122.956	11.8034	7.27465	7.1864	8.79691	12.5978	4.82805	6.65434	16.851
pgaptmp_001042	pgaptmp_001042	oppB	protein_coding	protein_coding	pgaptmp_001042	0.4506	921	GO:0055085		GO:0016020	TRUE	1.16001	1.99023e-05	0.000122131	Chromosome_I	1104581	1105501	921	+	9.72036	1066.19	969.009	886.261	586.797	765.34	442.022	432.853	667.937	586.935	1335.92	1687.13	1237.53	796.846	882.399	712.743	1415.77	1444.68	1322.99	584.515	544.132	736.903	47.7015	43.482	40.1646	34.3236	42.9673	23.4919	22.3776	31.5147
pgaptmp_004016	pgaptmp_004016	pgaptmp_004016	protein_coding	protein_coding	pgaptmp_004016	0.4296	135				TRUE	0.964205	1.9999e-05	0.000122581	Chromosome_II	784865	784999	135	-	9.84635	878.852	848.433	847.87	1091.6	759.195	1014.34	1164.92	1317.96	1163.31	1156.32	908.875	1217.15	656.92	749.207	798.377	1235.42	1129.12	1180.11	608.544	584.273	614.778	268.25	259.732	262.142	435.605	290.779	367.776	410.86	424.235
pgaptmp_004333	pgaptmp_004333	pgaptmp_004333	protein_coding	protein_coding	pgaptmp_004333	0.4583	840		GO:0016491		TRUE	-1.15699	2.01642e-05	0.000123396	Chromosome_II	1190163	1191002	840	+	11.6449	2221.03	2584.02	2923.44	3830.84	3199.27	3856.15	4720.54	4064.34	4121.22	3212.66	2781.05	3104.94	2281.54	2774.84	2895.76	1918.03	2296.85	2407.84	4663.83	5136.76	5050.32	108.951	127.133	145.263	245.685	196.932	224.702	267.575	210.256
pgaptmp_003170	pgaptmp_003170	pgaptmp_003170	protein_coding	protein_coding	pgaptmp_003170	0.4847	522	GO:0046177	GO:0005524,GO:0046316		TRUE	2.32367	2.01788e-05	0.000123396	Chromosome_I	3437372	3437893	522	+	11.0544	1151.76	1087.82	1092.1	666.874	857.508	966.512	1051.32	889.587	1039.45	2677.89	3688.11	3412.47	3752.98	3879.23	4973.39	6606.91	7287.33	13887.4	1760.81	1674.45	2125.97	90.9179	86.1251	87.3241	68.8236	84.9399	90.6294	95.8952	74.0552
pgaptmp_000925	pgaptmp_000925	pgaptmp_000925	protein_coding	protein_coding	pgaptmp_000925	0.4819	1986				TRUE	1.5546	2.0279e-05	0.000123864	Chromosome_I	970185	972170	1986	+	12.3642	5220.69	4458.67	4411.7	2552.18	3426.62	2642.24	2981.71	4466.59	3900.94	6826.91	7829.75	8064.33	14175.3	10619.9	11861	7112.54	8401.8	10324.6	2418.53	2995.28	3409.53	108.32	92.7829	92.7188	69.2304	89.2135	65.1217	71.4856	97.7315
pgaptmp_002601	pgaptmp_002601	pgpA	protein_coding	protein_coding	pgaptmp_002601	0.4524	504	GO:0006629	GO:0008962		TRUE	1.08122	2.0361e-05	0.000124199	Chromosome_I	2810589	2811092	504	-	10.8063	1324.45	1675.74	1911.38	1376.03	1458.31	2086.41	1722.5	1641.86	1427.93	1697.14	1754.26	2019.32	2601.17	1933.51	2161.94	2850.07	2886.7	2470.02	1316	1357.78	1194.66	108.283	137.41	158.292	147.082	149.611	202.629	162.728	141.56
pgaptmp_005006	pgaptmp_005006	pgaptmp_005006	protein_coding	protein_coding	pgaptmp_005006	0.4465	477				TRUE	1.25628	2.03811e-05	0.000124199	Chromosome_II	1959516	1959992	477	+	8.12718	142.621	148.74	149.48	175.527	183.654	203.693	213.828	202.993	205.498	486.339	424.504	414.98	570.018	683.721	675.854	411.246	410.104	517.289	181.613	196.244	167.818	12.3203	12.887	13.0799	19.8239	19.9079	20.9021	21.3441	18.4927
pgaptmp_003253	pgaptmp_003253	atpB	protein_coding	protein_coding	pgaptmp_003253	0.4416	813	GO:0015986	GO:0015078	GO:0045263	TRUE	1.71157	2.05383e-05	0.000125013	Chromosome_I	3521501	3522313	813	-	15.7227	60756.4	41953.4	38189.3	22194.5	30414.2	16857.1	23600.5	42996.5	35566.6	129760	145493	144574	93381.3	92290.1	96013.4	99312.6	92754	108402	26054	26520.4	39655.7	3079.36	2132.64	1960.61	1470.68	1934.33	1014.9	1382.18	2298.16
pgaptmp_002892	pgaptmp_002892	pgaptmp_002892	protein_coding	protein_coding	pgaptmp_002892	0.4591	1749				TRUE	-1.60573	2.05744e-05	0.000125088	Chromosome_I	3142857	3144605	1749	+	11.3911	4713.42	6144.98	6481.55	5062.09	4577.02	4360.02	4263.19	3637.46	4030.43	1089.72	1115.68	1233.83	1297.64	1284.2	1353.03	1523.63	1465.99	1377.23	5389.72	4693.3	3249.19	111.046	145.202	154.679	155.921	135.312	122.02	116.059	90.3744
pgaptmp_000815	pgaptmp_000815	pgaptmp_000815	protein_coding	protein_coding	pgaptmp_000815	0.45	300				TRUE	1.19358	2.06795e-05	0.000125581	Chromosome_I	860369	860668	300	-	9.26824	550.439	503.427	538.292	600.891	466.987	450.269	386.078	370.91	404.662	825.363	687.552	735.479	982.433	1125.48	1147.5	1043.28	826.865	1033.25	387.814	459.39	408.744	75.6042	69.3516	74.8923	107.904	80.4873	73.4655	61.2754	53.726
pgaptmp_000923	pgaptmp_000923	ccmD	protein_coding	protein_coding	pgaptmp_000923	0.4444	207	GO:0015886,GO:0017004		GO:0016020	TRUE	1.34155	2.09103e-05	0.000126748	Chromosome_I	969500	969706	207	+	9.65273	740.857	639.845	726.163	450.988	564.617	453.568	559.813	705.251	635.495	1051.38	888.92	1109.7	1807.27	1299.74	1549.33	1205.09	1282.24	1395.75	396.196	564.521	561.608	147.476	127.746	146.421	117.371	141.035	107.252	128.767	148.051
pgaptmp_004091	pgaptmp_004091	pgaptmp_004091	protein_coding	protein_coding	pgaptmp_004091	0.4671	456	GO:0019242	GO:0008929		TRUE	-1.27167	2.09199e-05	0.000126748	Chromosome_II	898913	899368	456	-	10.8697	1716.07	1942.42	2191.56	2941.67	2571.84	2824.49	3659.57	3087.43	3104.28	1119.99	1255.37	1217.15	1045.77	1265.33	1327.99	960.698	1147.76	1319.02	3019.25	2676.06	2643.55	155.071	176.043	200.599	347.531	291.624	303.185	382.119	294.219
pgaptmp_000873	pgaptmp_000873	pgaptmp_000873	protein_coding	protein_coding	pgaptmp_000873	0.4302	351				TRUE	1.428	2.10073e-05	0.000127077	Chromosome_I	920216	920566	351	-	9.37971	662.994	533.351	492.549	402.943	462.208	302.653	516.008	509.721	586.232	958.552	1088.47	992.989	723.201	957.875	873.472	1324.75	1174.39	1319.02	398.99	403.321	608.132	77.8324	62.7982	58.5711	61.8444	68.0885	42.2057	69.9974	63.1049
pgaptmp_001165	pgaptmp_001165	pgaptmp_001165	protein_coding	protein_coding	pgaptmp_001165	0.4082	948				TRUE	-0.968516	2.10225e-05	0.000127077	Chromosome_I	1236906	1237853	948	-	9.93684	1597.35	1621.18	1678.59	1281.22	1317.67	1123.2	1409.93	1337.37	1510.97	674.013	614.987	578.008	540.559	561.628	569.14	699.456	639.123	654.88	1289.18	1348.86	1295.19	69.4305	70.6746	73.9055	72.8079	71.869	57.9937	70.8143	61.3027
pgaptmp_000452	pgaptmp_000452	pgaptmp_000452	protein_coding	protein_coding	pgaptmp_000452	0.4157	1251				TRUE	-0.980897	2.12225e-05	0.000128139	Chromosome_I	486432	487682	1251	+	11.2181	3397.46	3745.78	3978.78	2604.07	2711.12	2526.78	3001.75	2903.1	2961.42	1664.85	1616.38	1769.22	1528.88	1563.9	1756.17	1682.06	1628.43	1733.12	3348.95	3435.55	3215.12	111.906	123.745	132.75	112.14	112.056	98.8653	114.249	100.842
pgaptmp_002723	pgaptmp_002723	phoR	protein_coding	protein_coding	pgaptmp_002723	0.485	1299	GO:0000160,GO:0006355,GO:0016310	GO:0000155,GO:0004721	GO:0016020	TRUE	1.24875	2.13389e-05	0.000128694	Chromosome_I	2949504	2950802	1299	-	9.70868	794.05	734.898	856.856	561.173	612.408	544.281	677.121	803.016	731.206	982.768	995.953	1039.3	1115	1056.66	1082.95	1387.11	1378.11	1360.03	455.43	634.609	636.379	25.1882	23.3808	27.5321	23.273	24.3768	20.5091	24.8193	26.8629
pgaptmp_002566	pgaptmp_002566	pgaptmp_002566	protein_coding	protein_coding	pgaptmp_002566	0.4343	1179	GO:0030655	GO:0008800		TRUE	-1.08397	2.13709e-05	0.000128739	Chromosome_I	2769651	2770829	1179	+	13.2039	9963.41	11054.3	9844.45	9769.92	11390	8817.36	8989.67	9298.87	9427.56	10532	11915.2	11639.8	8734.38	9092.6	9331.53	5595.65	5637.6	5825.12	11754.6	11616.7	12933.6	348.219	387.488	348.513	446.418	499.52	366.064	363.047	342.731
pgaptmp_004277	pgaptmp_004277	pgaptmp_004277	protein_coding	protein_coding	pgaptmp_004277	0.4547	717				TRUE	-1.22881	2.14424e-05	0.000129023	Chromosome_II	1129287	1130003	717	+	10.0955	953.631	1210.16	1419.65	1883.39	1413.25	2055.9	2317.95	1877.69	1935.34	754.733	751.046	848.487	506.682	582.717	500.632	739.906	588.526	694.569	1808.31	1544.47	1426.45	54.8049	69.7534	82.6425	141.509	101.916	140.351	153.928	113.8
pgaptmp_003037	pgaptmp_003037	rfaD	protein_coding	protein_coding	pgaptmp_003037	0.4374	942	GO:0005975	GO:0008712		TRUE	-1.07096	2.14996e-05	0.000129144	Chromosome_I	3289565	3290506	942	+	12.6261	7269.8	7778.47	8022.91	7568.79	6010.07	6006.06	7051.86	6531.6	6865.88	5513.19	5057.77	5439.21	4267.03	5992.55	5650.56	4604.61	4509.81	4351.31	9399.19	8758.36	10246.9	318.002	341.26	355.486	432.852	329.892	312.084	356.439	301.305
pgaptmp_003681	pgaptmp_003681	pgaptmp_003681	protein_coding	protein_coding	pgaptmp_003681	0.4966	1029	GO:0006351,GO:0006355,GO:0045892	GO:0000976,GO:0003677,GO:0003700,GO:0043565		TRUE	1.31588	2.15246e-05	0.000129144	Chromosome_II	437255	438283	1029	+	8.94327	433.259	399.573	354.505	372.834	406.907	427.178	383.85	402.255	410.292	546.879	633.128	581.714	624.515	544.979	509.855	906.764	917.408	945.937	283.876	402.046	415.391	17.3496	16.0481	14.3796	19.5193	20.4467	20.3201	17.7615	16.9872
pgaptmp_004729	pgaptmp_004729	pgaptmp_004729	protein_coding	protein_coding	pgaptmp_004729	0.4385	723				TRUE	-1.63834	2.15363e-05	0.000129144	Chromosome_II	1646410	1647132	723	-	7.46244	40.8589	33.4444	23.6881	281.868	391.204	250.699	247.238	419.419	351.176	165.476	261.234	309.383	187.06	170.93	225.285	82.5863	98.5314	127.007	291.699	310.296	424.529	2.32866	1.91173	1.36752	21.0025	27.9775	16.9726	16.2821	25.2085
pgaptmp_002088	pgaptmp_002088	pgaptmp_002088	protein_coding	protein_coding	pgaptmp_002088	0.4405	933	GO:0005975	GO:0019200	GO:0005829	TRUE	-1.29361	2.1594e-05	0.000129343	Chromosome_I	2261685	2262617	933	-	7.40878	337.664	345.006	359.406	254.322	259.437	204.518	273.967	328.371	290.653	80.7201	114.29	96.3347	72.1728	105.444	118.571	85.9572	67.9068	89.9633	210.671	229.377	196.895	14.9129	15.2822	16.0784	14.6847	14.3779	10.7296	13.9813	15.294
pgaptmp_001955	pgaptmp_001955	pgaptmp_001955	protein_coding	protein_coding	pgaptmp_001955	0.4465	663				TRUE	1.00348	2.16757e-05	0.000129684	Chromosome_I	2114617	2115279	663	-	10.7557	1588.87	1893.13	1978.36	1155.02	1090.32	1623.77	1343.85	1081.39	1068.31	2221.82	2403.71	2486.18	2053.24	1894.66	2254.16	2791.08	2793.5	2419.75	1365.73	1288.33	1332.57	98.7492	118.007	124.547	93.8511	85.0323	119.879	96.5093	70.8769
pgaptmp_004667	pgaptmp_004667	vctC	protein_coding	protein_coding	pgaptmp_004667	0.4193	756				TRUE	-1.9122	2.17531e-05	0.000129869	Chromosome_II	1581960	1582715	756	-	8.43242	418.611	517.509	467.227	676.483	779.677	753.747	843.431	611.218	693.907	145.296	206.81	157.47	181.168	158.721	150.19	198.881	129.156	127.007	734.277	594.468	447.791	22.8164	28.2903	25.7957	48.2058	53.3257	48.8019	53.1203	35.1327
pgaptmp_002587	pgaptmp_002587	pgaptmp_002587	protein_coding	protein_coding	pgaptmp_002587	0.4534	1566	GO:0009966	GO:0009975		TRUE	-1.11175	2.1756e-05	0.000129869	Chromosome_I	2795276	2796841	1566	+	12.323	7328.39	8684.99	8265.51	6602.11	5958.18	5048.62	6676.18	6352.49	6203.64	3781.74	3399.66	3905.26	2964.98	3676.11	3702.05	3470.31	3282.16	3296.89	8093.81	6752.59	6937.86	192.83	229.203	220.302	227.12	196.728	157.802	202.987	176.274
pgaptmp_001137	pgaptmp_001137	pgaptmp_001137	protein_coding	protein_coding	pgaptmp_001137	0.4369	1767				TRUE	-1.05333	2.2116e-05	0.000131818	Chromosome_I	1205657	1207423	1767	+	10.2279	2874.77	2688.76	2720.86	1545.15	1585.3	1300.5	1695.77	2144.86	2073.28	577.149	607.731	646.554	871.965	841.332	773.345	640.465	611.161	697.215	1231.62	1360.33	1496.24	67.0386	62.8864	64.2704	47.1083	46.3893	36.0253	45.6945	52.7473
pgaptmp_005294	pgaptmp_005294	pgaptmp_005294	protein_coding	protein_coding	pgaptmp_005294	0.3824	693	GO:0006355	GO:0003700,GO:0043565		TRUE	2.1126	2.21325e-05	0.000131818	Chromosome_II	2280845	2281537	693	+	8.49972	99.449	136.418	138.044	506.081	430.12	529.437	328.909	291.056	283.615	308.755	308.401	583.566	191.479	277.484	434.76	1464.64	837.517	1824.4	349.815	300.101	284.127	5.91324	8.13543	8.31432	39.3415	32.0922	37.395	22.5982	18.2508
pgaptmp_004747	pgaptmp_004747	pgaptmp_004747	protein_coding	protein_coding	pgaptmp_004747	0.4378	1005				TRUE	-1.10957	2.21802e-05	0.000131893	Chromosome_II	1666334	1667338	1005	-	11.4413	2909.46	3120.89	3269.77	4611.1	3961.88	3815.74	4955.16	5365.14	5135.33	1854.55	1792.35	1763.67	1388.96	1471.78	1545.37	2132.08	1655.06	1770.16	3943.52	4134.51	3957.84	119.29	128.338	135.798	247.174	203.835	185.843	234.76	231.981
pgaptmp_004741	pgaptmp_004741	pgaptmp_004741	protein_coding	protein_coding	pgaptmp_004741	0.4227	537				TRUE	-1.61561	2.21953e-05	0.000131893	Chromosome_II	1658268	1658804	537	-	8.98454	734.689	942.605	1015.32	987.818	867.066	1474.51	1604.45	1213.48	1224.54	207.854	253.977	183.407	187.06	140.962	146.237	266.299	300.92	191.833	915.331	802.818	662.133	56.3751	72.5433	78.9169	99.0985	83.4876	134.402	142.261	98.1965
pgaptmp_001100	pgaptmp_001100	sohB	protein_coding	protein_coding	pgaptmp_001100	0.4708	1062	GO:0006508	GO:0008233		TRUE	-1.05165	2.24703e-05	0.000133376	Chromosome_I	1172146	1173207	1062	+	12.0525	4335.67	5424.16	5879.55	5142.81	4740.19	5079.96	5188.29	5023.33	5105.78	4207.54	4626.01	4283.19	4088.81	4379.81	4043.27	2054.55	2351.44	2304.65	4914.18	4415.5	4649.05	168.225	211.081	231.079	260.879	230.789	234.136	232.612	205.544
pgaptmp_003116	pgaptmp_003116	gspE	protein_coding	protein_coding	pgaptmp_003116	0.481	1503	GO:0015628	GO:0005524	GO:0015627	TRUE	1.50519	2.25424e-05	0.00013363	Chromosome_I	3370914	3372416	1503	-	11.83	4038.09	3316.28	2806.63	1788.58	2476.26	1606.45	1979.39	2901.61	2570.83	4748.36	5643.73	5550.36	6719.43	6034.72	6401.51	6089.48	5971.8	8244.87	2109.51	2161.87	2903.58	110.707	91.1872	77.9412	64.1082	85.1885	52.3169	62.7055	83.8913
pgaptmp_001217	pgaptmp_001217	nrfB	protein_coding	protein_coding	pgaptmp_001217	0.4527	603	GO:0008152		GO:0042597	TRUE	-1.63082	2.25639e-05	0.00013363	Chromosome_I	1300264	1300866	603	+	7.97168	457.157	660.088	664.083	507.362	377.549	409.86	562.04	451.51	472.223	159.422	114.29	101.893	117.833	138.742	126.476	96.0698	118.504	82.0253	373.844	346.614	254.219	31.2397	45.2403	45.967	45.3278	32.3743	33.2699	44.3795	32.5378
pgaptmp_003979	pgaptmp_003979	pgaptmp_003979	protein_coding	protein_coding	pgaptmp_003979	0.4418	1530				TRUE	-1.47666	2.26124e-05	0.000133767	Chromosome_II	746123	747652	1530	-	7.69358	191.96	274.596	307.945	352.335	344.778	454.392	415.776	397.777	405.365	108.972	99.7767	120.418	145.818	138.742	125.158	80.9009	107.852	99.2242	322.433	296.915	232.619	5.16984	7.41729	8.40085	12.4059	11.6518	14.5369	12.939	11.2976
pgaptmp_004813	pgaptmp_004813	mngA	protein_coding	protein_coding	pgaptmp_004813	0.4972	1935	GO:0009401	GO:0005351,GO:0022877	GO:0016020	TRUE	-1.46451	2.27721e-05	0.00013456	Chromosome_II	1738695	1740629	1935	+	7.1247	249.779	278.997	282.623	297.883	268.995	188.849	435.08	464.944	413.107	40.3601	34.4683	42.6096	47.1332	51.0571	51.3807	80.9009	62.5808	84.6713	181.613	239.571	258.373	5.31904	5.95882	6.09633	8.29333	7.188	4.77713	10.7058	10.4414
pgaptmp_004381	pgaptmp_004381	pgaptmp_004381	protein_coding	protein_coding	pgaptmp_004381	0.4587	678				TRUE	-0.978179	2.28789e-05	0.000135039	Chromosome_II	1245370	1246047	678	-	11.9551	3722.02	4693.66	4520.34	6228	7228.74	6544.57	7963.6	8998.86	8147.42	2395.37	3232.76	3071.6	3540.88	2380.81	2292.37	2170.84	2034.54	1992.42	4113.4	4189.95	3951.2	226.207	286.104	278.28	494.861	551.286	472.481	559.258	576.76
pgaptmp_002378	pgaptmp_002378	pgaptmp_002378	protein_coding	protein_coding	pgaptmp_002378	0.3895	765				TRUE	-1.03603	2.29679e-05	0.000135413	Chromosome_I	2591297	2592061	765	+	10.0698	1272.02	1294.65	1238.32	1478.52	1349.76	1001.97	867.933	857.496	970.484	1077.61	896.176	941.116	929.409	1240.91	1007.85	780.357	741.649	697.215	1484.2	1388.37	1721.38	68.5159	69.9412	67.5633	104.119	91.23	64.1102	54.0203	48.7089
pgaptmp_001697	pgaptmp_001697	ccoN	protein_coding	protein_coding	pgaptmp_001697	0.4517	1428		GO:0004129		TRUE	1.43623	2.29977e-05	0.000135437	Chromosome_I	1794500	1795927	1428	+	12.448	4657.14	4413.79	4378.21	3112.08	4404.97	3406.71	3855.58	4569.58	3963.57	10174.8	11418.1	10076.2	7640	7974.89	7393.55	8681.68	7806.62	11470.3	3536.15	3079.38	3738.52	134.385	127.739	127.97	117.405	159.499	116.772	128.557	139.055
pgaptmp_000863	pgaptmp_000863	pgaptmp_000863	protein_coding	protein_coding	pgaptmp_000863	0.4893	1455	GO:0006508	GO:0004222		TRUE	-1.16373	2.3269e-05	0.000136881	Chromosome_I	911556	913010	1455	-	10.785	3032.81	3336.52	2505.22	2361.28	2013.37	1260.09	2360.27	2573.23	2607.43	1162.37	972.369	989.284	1148.87	1744.82	1562.5	1060.14	1003.96	1172.17	2297.83	2151.04	2867.86	85.8896	94.7704	71.8661	87.4278	71.5491	42.3909	77.2381	76.8518
pgaptmp_000837	pgaptmp_000837	dnaE	protein_coding	protein_coding	pgaptmp_000837	0.4833	3480	GO:0006260	GO:0003676,GO:0008408		TRUE	1.19607	2.33848e-05	0.000137403	Chromosome_I	882792	886271	3480	+	13.2773	9716.71	8206.21	8601.23	5757.79	7337.29	6541.27	5780.77	7018.93	7065.75	11450.2	12548.3	13351.6	17641.1	14291.5	16101.9	16620.1	16642.5	17873.6	7284.65	6685.05	8420.8	115.053	97.4552	103.163	89.1335	109.019	92.0059	79.0932	87.6454
pgaptmp_000916	pgaptmp_000916	pgaptmp_000916	protein_coding	protein_coding	pgaptmp_000916	0.4692	780		GO:0005524		TRUE	1.7416	2.341e-05	0.000137403	Chromosome_I	964233	965012	780	+	11.0562	2703.63	1781.36	1698.19	1019.21	1397.55	780.137	884.267	1873.21	1615.13	3533.52	3876.78	4157.21	5025.58	3962.47	4089.38	3256.26	3734.87	4305.01	862.244	993.965	1527.81	142.827	94.3839	90.8726	70.3935	92.6437	48.9563	53.9786	104.359
pgaptmp_000252	pgaptmp_000252	miaA	protein_coding	protein_coding	pgaptmp_000252	0.4673	933	GO:0006400	GO:0052381	GO:0005737	TRUE	-1.26248	2.34744e-05	0.000137627	Chromosome_I	263727	264659	933	+	14.0024	24117.5	24029	25462.3	16345.1	20238.1	17108.6	22299.7	24134.5	22807.4	12606.5	15902.6	13961.1	18965.2	17028.6	16947.7	6337.24	7584.26	8010.7	16453.6	17664.5	18734.1	1065.15	1064.38	1139.08	943.78	1121.59	897.563	1138.02	1124.07
pgaptmp_000196	pgaptmp_000196	pgaptmp_000196	protein_coding	protein_coding	pgaptmp_000196	0.4967	1836	GO:0017004	GO:0009055,GO:0030554,GO:0047134		TRUE	0.954691	2.35719e-05	0.000138045	Chromosome_I	212695	214530	1836	-	10.5977	1336.78	1305.21	1324.08	1196.02	1320.4	1218.86	1245.1	1268.71	1250.58	1521.57	1685.32	1448.73	1598.11	1567.23	1703.47	2885.47	2792.17	2808.71	1355.11	1472.47	1550.24	30.0017	29.3799	30.1012	35.0937	37.1857	32.4948	32.2897	30.028
pgaptmp_005299	pgaptmp_005299	pgaptmp_005299	protein_coding	protein_coding	pgaptmp_005299	0.4717	441		GO:0003677		TRUE	-1.19131	2.37211e-05	0.000138765	Chromosome_II	2285138	2285578	441	-	9.45639	665.306	790.345	923.836	976.928	837.026	1090.21	1652.71	1354.53	1299.14	379.385	370.081	479.821	561.18	486.152	499.315	360.683	388.8	452.462	937.125	1005.43	843.243	62.1643	74.0661	87.4374	119.341	98.1396	121.005	178.439	133.471
pgaptmp_003694	pgaptmp_003694	pgaptmp_003694	protein_coding	protein_coding	pgaptmp_003694	0.4676	1125				TRUE	-1.2702	2.37732e-05	0.000138915	Chromosome_II	452356	453480	1125	+	11.6653	3473.78	3457.98	3085.99	4056.97	4244.53	2499.57	3678.13	4725.56	4486.47	2470.04	2869.94	2967.85	3309.64	3499.63	3439.87	1746.11	1830.82	1930.24	3619.41	4423.15	5341.92	127.235	127.032	114.494	194.274	195.084	108.754	155.671	182.532
pgaptmp_001465	pgaptmp_001465	pgaptmp_001465	protein_coding	protein_coding	pgaptmp_001465	0.444	696				TRUE	-1.05661	2.38139e-05	0.000138963	Chromosome_I	1516617	1517312	696	-	8.30049	558.148	675.05	746.583	461.879	374.818	432.951	629.604	512.707	515.152	135.206	161.457	138.944	136.981	150.951	155.46	224.163	211.709	191.833	452.636	456.842	426.191	33.0444	40.0837	44.7724	35.7506	27.8455	30.4482	43.0716	32.0108
pgaptmp_002851	pgaptmp_002851	pgaptmp_002851	protein_coding	protein_coding	pgaptmp_002851	0.4851	738				TRUE	1.94178	2.38342e-05	0.000138963	Chromosome_I	3098507	3099244	738	-	10.889	1311.34	1368.58	1450.69	1103.77	1356.58	1434.1	1568.81	1733.65	1602.46	2510.4	3022.33	2486.18	2579.07	2016.75	2084.21	3586.61	3544.47	6509.11	1095.27	1226.53	1223.74	73.2179	76.6401	82.0464	80.5723	95.046	95.1164	101.216	102.08
pgaptmp_002682	pgaptmp_002682	hisS	protein_coding	protein_coding	pgaptmp_002682	0.4815	1269	GO:0006427	GO:0004821,GO:0005524	GO:0005737	TRUE	1.55117	2.38912e-05	0.000139141	Chromosome_I	2905753	2907021	1269	-	13.1428	9554.05	7607.73	7988.61	4699.5	6072.88	4344.35	5506.06	7874.19	7575.27	10945.7	10746.9	13409.1	17063.7	14909.8	16769.9	15187.5	16050	18257.2	4350.34	5610.81	7000.16	310.23	247.762	262.755	199.505	247.444	167.57	206.591	269.638
pgaptmp_005118	pgaptmp_005118	pgaptmp_005118	protein_coding	protein_coding	pgaptmp_005118	0.4491	432				TRUE	-1.20221	2.39207e-05	0.000139158	Chromosome_II	2087333	2087764	432	+	6.91858	343.832	385.491	417.401	138.371	131.767	154.213	207.146	144.035	168.199	42.3781	58.0519	48.1674	69.2269	63.2664	88.2694	60.6757	70.5698	66.1495	179.937	151.643	159.51	32.7959	36.8784	40.3283	17.2555	15.7712	17.4731	22.831	14.4885
pgaptmp_001752	pgaptmp_001752	pgaptmp_001752	protein_coding	protein_coding	pgaptmp_001752	0.4427	969				TRUE	-1.2745	2.39494e-05	0.000139171	Chromosome_I	1848480	1849448	969	-	9.39287	1346.8	1470.68	1216.26	1187.69	1207.07	860.954	1083.25	1106.76	1161.91	383.421	373.709	320.498	294.583	342.97	272.713	417.988	384.805	341.331	768.364	942.993	1104.11	57.2715	62.7241	52.3895	66.0302	64.4097	43.49	53.2275	49.6326
pgaptmp_004819	pgaptmp_004819	pgaptmp_004819	protein_coding	protein_coding	pgaptmp_004819	0.4472	369		GO:0003677		TRUE	1.15757	2.40479e-05	0.000139489	Chromosome_II	1748284	1748652	369	-	9.1528	222.026	264.035	313.663	500.956	340.682	837.039	544.964	337.327	381.438	900.03	948.786	948.527	899.95	599.366	689.028	1255.65	969.336	975.043	484.488	487.425	447.791	24.7933	29.5717	35.4795	73.137	47.7383	111.033	70.3192	39.7248
pgaptmp_004092	pgaptmp_004092	torT	protein_coding	protein_coding	pgaptmp_004092	0.4495	1050				TRUE	-1.0658	2.40572e-05	0.000139489	Chromosome_II	899433	900482	1050	-	10.8334	1689.09	1690.7	1750.47	2411.89	2710.44	2108.68	2351.36	2694.14	2511.72	1567.99	1705.27	1721.06	1524.47	1419.61	1596.75	1109.02	1011.94	1210.53	2110.63	2418.65	2495.67	66.2861	66.5457	69.5834	123.746	133.473	98.3	106.626	111.498
pgaptmp_002764	pgaptmp_002764	ileS	protein_coding	protein_coding	pgaptmp_002764	0.4726	2829	GO:0006428	GO:0000166,GO:0004822,GO:0005524		TRUE	1.41885	2.41013e-05	0.000139591	Chromosome_I	2991762	2994590	2829	-	14.394	22854	17316.3	16658.4	10383.6	13252.5	8505.63	10678	17402.9	14976.7	36580.4	37710.1	42276.1	43212.3	42222	43279.7	34411.5	35391.4	36248.6	11693.7	11768.9	16382.2	332.88	252.967	245.778	197.733	242.219	147.166	179.718	267.317
pgaptmp_005199	pgaptmp_005199	fucP	protein_coding	protein_coding	pgaptmp_005199	0.4401	1311	GO:0015756	GO:0015150,GO:0015535		TRUE	-1.83683	2.41307e-05	0.000139608	Chromosome_II	2169465	2170775	1311	-	5.43547	63.9866	85.3713	57.995	88.404	86.7066	32.9867	76.4731	80.6002	81.6361	14.126	21.7695	20.3785	33.877	13.3192	23.7142	15.1689	21.3041	19.8448	70.4101	80.2818	124.617	2.01115	2.69123	1.84641	3.63273	3.41974	1.2316	2.7774	2.6716
pgaptmp_001569	pgaptmp_001569	pgaptmp_001569	protein_coding	protein_coding	pgaptmp_001569	0.4658	1185				TRUE	1.33435	2.41683e-05	0.000139671	Chromosome_I	1628822	1630006	1185	+	6.91901	104.075	124.977	129.876	124.919	106.506	118.752	108.399	107.467	107.675	92.8282	99.7767	92.6295	172.331	154.281	115.936	259.557	202.389	190.51	81.5863	88.5649	71.4472	3.61897	4.35865	4.57459	5.67902	4.64728	4.9052	4.35551	3.94089
pgaptmp_003317	pgaptmp_003317	pgaptmp_003317	protein_coding	protein_coding	pgaptmp_003317	0.4776	894	GO:0006355	GO:0003700		TRUE	-1.46483	2.41955e-05	0.000139676	Chromosome_II	53417	54310	894	-	11.2058	2407.59	2513.61	2407.2	4209.44	4124.37	3178.27	4982.63	5588.28	5535.07	1511.48	1436.78	1728.47	1571.6	1370.77	1359.61	1041.6	1167.73	1279.33	2430.27	3712.08	3574.85	110.969	116.199	112.387	253.659	238.541	174.015	265.371	271.63
pgaptmp_002459	pgaptmp_002459	yfcE	protein_coding	protein_coding	pgaptmp_002459	0.467	546				TRUE	-1.25641	2.42671e-05	0.000139935	Chromosome_I	2677351	2677896	546	-	10.2113	1948.89	2154.53	2412.1	1781.53	1433.05	1600.68	1992.01	1795.59	1794.59	829.399	696.623	696.574	595.057	784.725	785.202	510.687	724.339	668.109	1521.08	1572.5	1507.87	147.08	163.08	184.393	175.778	135.71	143.498	173.713	142.907
pgaptmp_003280	pgaptmp_003280	pgaptmp_003280	protein_coding	protein_coding	pgaptmp_003280	0.4526	285				TRUE	1.36335	2.44894e-05	0.000141022	Chromosome_II	15509	15793	285	-	8.13044	80.9469	110.895	114.356	260.728	238.955	339.763	193.039	179.111	177.347	468.177	469.857	457.59	353.499	359.619	353.078	761.817	620.482	554.332	223.524	217.271	298.251	11.7034	16.0808	16.7477	49.2841	43.3527	58.3532	32.2502	27.3096
pgaptmp_001963	pgaptmp_001963	pgaptmp_001963	protein_coding	protein_coding	pgaptmp_001963	0.4408	735				TRUE	-1.78401	2.45092e-05	0.000141022	Chromosome_I	2123423	2124157	735	-	7.04772	102.533	139.939	156.832	92.8882	96.9476	118.752	83.8977	89.5557	85.1549	66.5941	85.2637	85.2192	110.469	98.7843	102.761	150.004	162.444	116.423	652.131	507.814	379.667	5.74822	7.8685	8.90609	6.80828	6.82014	7.90838	5.43495	5.29473
pgaptmp_002542	pgaptmp_002542	pgaptmp_002542	protein_coding	protein_coding		0.5	1000				TRUE	1.98897	2.46197e-05	0.000141503	pgaptmp_002542	1	1000	1000	+	11.5811	1028.41	1245.37	1560.15	1690.57	1800.36	3474.33	1343.11	1404.53	1041.56	9896.29	8100.05	11376.8	6871.14	3940.27	5062.98	9991.26	7154.18	6284.2	2437.53	2033.81	1394.88	42.3765	51.4681	65.1188	91.0744	93.0899	170.061	63.9503	61.0336
pgaptmp_004883	pgaptmp_004883	pgaptmp_004883	protein_coding	protein_coding	pgaptmp_004883	0.4289	429	GO:0030254			TRUE	-1.76051	2.46665e-05	0.000141575	Chromosome_II	1816444	1816872	429	+	10.2295	1618.17	1472.44	1346.95	1508.63	1968.99	981.356	1723.24	2764.29	2472.31	918.192	1476.69	1187.51	427.145	462.843	574.41	488.776	668.416	728.967	1604.9	2160.6	2736.59	155.426	141.847	131.05	189.448	237.318	111.97	191.259	280.003
pgaptmp_001860	pgaptmp_001860	pgaptmp_001860	protein_coding	protein_coding	pgaptmp_001860	0.4714	630				TRUE	-2.42702	2.4686e-05	0.000141575	Chromosome_I	1990677	1991306	630	-	6.45456	782.487	363.488	193.589	289.555	392.569	164.109	136.612	400.762	364.547	28.252	23.5836	22.2311	25.0395	43.2875	30.3014	11.798	21.3041	10.5839	90.5272	90.4763	178.618	51.1793	23.8447	12.8257	24.7602	32.2196	12.7504	10.3248	27.6429
pgaptmp_002538	pgaptmp_002538	pgaptmp_002538	protein_coding	protein_coding		0.5	1000				TRUE	1.92111	2.47347e-05	0.000141699	pgaptmp_002538	1	1000	1000	+	12.2534	1749.22	1826.24	2708.61	3169.73	2754.13	4232.2	2017.26	1878.43	1567.98	14085.7	15144.3	16760.4	8274.83	6637.42	8048.33	17597.6	12159.3	10615.7	4131.28	3796.82	2688.41	72.0781	75.4745	113.054	170.76	142.406	207.157	96.0492	81.6268
pgaptmp_000435	pgaptmp_000435	pgaptmp_000435	protein_coding	protein_coding	pgaptmp_000435	0.4486	399				TRUE	1.20119	2.50669e-05	0.000143342	Chromosome_I	468503	468901	399	-	7.7293	588.214	859.874	651.014	144.137	113.333	131.947	256.89	178.365	209.017	167.494	156.014	164.881	166.439	155.391	164.682	321.918	291.6	287.089	144.173	120.423	111.325	60.7464	89.0643	68.1018	19.4611	14.6868	16.1867	30.6554	19.4256
pgaptmp_004294	pgaptmp_004294	pgaptmp_004294	protein_coding	protein_coding	pgaptmp_004294	0.4444	882				TRUE	-1.3756	2.50759e-05	0.000143342	Chromosome_II	1146156	1147037	882	+	9.48139	740.857	726.096	820.098	1297.23	1085.54	1375.55	1195.36	1101.54	1180.2	452.033	457.159	353.845	589.165	521.67	296.427	461.809	482.005	316.194	1138.3	1017.54	1162.26	34.6118	34.0226	38.8095	79.2343	63.6387	76.3378	64.53	54.2709
pgaptmp_000556	pgaptmp_000556	recO	protein_coding	protein_coding	pgaptmp_000556	0.4754	732	GO:0006281,GO:0006310	GO:0003677		TRUE	1.04595	2.51911e-05	0.000143789	Chromosome_I	562574	563305	732	+	10.1554	1012.22	873.076	955.692	730.294	801.524	677.878	721.669	849.287	760.06	1505.43	1652.66	1724.76	1830.83	1856.92	1800.96	1889.37	1726.96	1784.71	784.569	827.667	999.43	56.98	49.2927	54.4939	53.7466	56.6173	45.3287	46.9418	50.4174
pgaptmp_002089	pgaptmp_002089	pgaptmp_002089	protein_coding	protein_coding	pgaptmp_002089	0.4464	336				TRUE	-1.60292	2.52089e-05	0.000143789	Chromosome_I	2262652	2262987	336	-	6.35668	167.29	186.585	197.673	159.512	166.586	142.668	153.689	163.439	128.788	40.3601	32.6542	42.6096	36.8228	36.6279	32.9363	32.0233	39.9452	27.7828	131.879	131.892	93.8783	20.5159	22.9498	24.5555	25.5751	25.6356	20.7835	21.7789	21.1375
pgaptmp_001159	pgaptmp_001159	pgaptmp_001159	protein_coding	protein_coding	pgaptmp_001159	0.4531	384				TRUE	-1.56829	2.56488e-05	0.00014614	Chromosome_I	1230749	1231132	384	+	6.65624	466.408	364.368	433.737	320.945	261.485	153.388	455.869	463.451	453.221	26.234	18.1412	14.8207	13.2562	27.7484	30.3014	37.0796	38.6137	37.0437	94.9977	138.263	157.018	50.0487	39.2149	47.1451	45.026	35.2095	19.5521	56.5251	52.4457
pgaptmp_000847	pgaptmp_000847	rnhA	protein_coding	protein_coding	pgaptmp_000847	0.4774	465		GO:0003676,GO:0004523		TRUE	-1.00948	2.58791e-05	0.000147247	Chromosome_I	894809	895273	465	-	11.092	2527.86	3062.81	3462.55	3042.25	2545.9	3068.59	3392.29	2721	2795.33	1578.08	1556.52	1872.97	1375.7	1351.9	1449.2	1382.06	1456.67	1383.85	2990.75	2935.38	2614.47	224.005	272.213	310.802	352.457	283.095	323.012	347.354	254.281
pgaptmp_004835	pgaptmp_004835	sigZ	protein_coding	protein_coding	pgaptmp_004835	0.4296	561				TRUE	-1.11205	2.58991e-05	0.000147247	Chromosome_II	1760679	1761239	561	+	9.43588	595.923	797.386	746.583	876.353	833.613	1010.22	974.846	831.376	919.814	512.573	544.236	561.335	621.57	577.167	526.982	463.495	419.424	437.909	1073.47	960.833	853.213	43.7709	58.7418	55.5465	84.1551	76.8326	88.1425	82.7382	64.3979
pgaptmp_001584	pgaptmp_001584	pgaptmp_001584	protein_coding	protein_coding	pgaptmp_001584	0.452	885	GO:0006355	GO:0003677,GO:0003700		TRUE	-1.25971	2.59825e-05	0.000147562	Chromosome_I	1651929	1652813	885	-	7.66293	301.431	359.968	329.183	302.367	264.216	272.965	331.878	294.041	310.358	149.332	94.3343	174.144	113.414	177.59	118.571	116.295	94.5369	96.5782	290.581	252.951	228.465	14.0347	16.8098	15.5251	18.4058	15.4369	15.0972	17.8554	14.4379
pgaptmp_000184	pgaptmp_000184	acs	protein_coding	protein_coding	pgaptmp_000184	0.4885	1953	GO:0019427	GO:0003987,GO:0016208		TRUE	1.19544	2.60314e-05	0.00014768	Chromosome_I	196574	198526	1953	-	8.90328	531.166	563.275	570.148	417.677	415.782	421.406	432.11	414.195	417.329	205.836	177.784	279.741	605.368	692.6	669.267	942.158	999.961	988.273	403.461	493.797	368.036	11.2069	11.9195	12.185	11.5213	11.008	10.5616	10.5348	9.21596
pgaptmp_003833	pgaptmp_003833	pgaptmp_003833	protein_coding	protein_coding	pgaptmp_003833	0.4472	360				TRUE	-1.24883	2.62917e-05	0.000148995	Chromosome_II	598755	599114	360	+	8.79433	495.703	642.485	663.267	771.933	786.504	1006.92	1226.54	973.919	982.448	219.962	234.022	226.016	276.908	202.008	221.332	217.421	231.682	218.293	607.427	567.707	448.622	56.7385	73.7568	76.9	115.516	112.965	136.907	162.223	117.559
pgaptmp_002385	pgaptmp_002385	hutH	protein_coding	protein_coding	pgaptmp_002385	0.4942	1554	GO:0006548	GO:0004397		TRUE	1.389	2.63674e-05	0.000149264	Chromosome_I	2596658	2598211	1554	+	10.751	1987.44	1483	1628.76	862.9	967.428	738.078	1026.82	1232.88	1289.29	2250.07	2666.76	2543.61	2842.72	3195.51	3466.22	2853.44	2842.77	3337.9	930.978	1067.88	1453.87	52.6988	39.4395	43.7469	29.9139	32.1893	23.2479	31.4612	34.4753
pgaptmp_001680	pgaptmp_001680	pyrD	protein_coding	protein_coding	pgaptmp_001680	0.452	1011	GO:0006222	GO:0004152	GO:0016020	TRUE	-1.17742	2.63969e-05	0.00014927	Chromosome_I	1776075	1777085	1011	+	11.6798	5928.4	5644.19	5948.16	4201.75	4249.31	3607.1	3115.35	3608.35	3656.73	3535.54	3958.41	3795.96	1947.19	1787	1887.91	1570.83	1886.74	1891.87	3502.62	4380.46	4294.31	241.626	230.724	245.568	223.895	217.326	174.638	146.72	155.094
pgaptmp_001778	pgaptmp_001778	pgaptmp_001778	protein_coding	protein_coding	pgaptmp_001778	0.495	17800				TRUE	1.48752	2.64625e-05	0.00014948	Chromosome_I	1879828	1897623	17796	-	12.6638	8189.51	5857.18	5770.91	3408.68	4000.79	2742.85	4080.55	6642.8	5682.86	9115.32	9870.64	10033.6	10199.9	12976.3	10266.9	10085.6	10921	10524.4	3250.6	3119.52	4924.04	18.9582	13.5991	13.5321	10.3164	11.6217	7.54249	10.9152	16.2169
pgaptmp_002511	pgaptmp_002511	pgaptmp_002511	protein_coding	protein_coding	pgaptmp_002511	0.4372	876		GO:0008233		TRUE	-1.07814	2.65214e-05	0.000149653	Chromosome_I	2732973	2733848	876	+	10.379	1819.38	2025.15	2269.97	1766.16	1343.61	1502.55	2108.58	1915	2030.35	585.221	502.512	555.777	954.448	1359.67	1342.49	937.102	917.408	908.893	2204.51	1915.93	1749.63	85.5809	95.542	108.158	108.615	79.3074	83.9569	114.609	94.9953
pgaptmp_000598	pgaptmp_000598	luxS	protein_coding	protein_coding	pgaptmp_000598	0.4451	519				TRUE	1.15092	2.66e-05	0.000149866	Chromosome_I	603901	604419	519	+	10.1461	769.381	735.778	783.341	795.636	705.942	785.909	824.128	776.896	826.214	1341.97	1268.07	1359.8	2285.96	2841.44	2374.05	1874.2	1971.96	1737.08	805.245	714.253	991.122	61.0847	58.5896	62.9976	82.5869	70.3308	74.1204	75.6066	65.0479
pgaptmp_000964	pgaptmp_000964	recR	protein_coding	protein_coding	pgaptmp_000964	0.48	600	GO:0006281,GO:0006310	GO:0003677,GO:0046872		TRUE	1.21173	2.66162e-05	0.000149866	Chromosome_I	1017100	1017699	600	+	13.3373	5826.63	6685.37	7278.78	6178.67	6974.08	9091.15	6408.15	5640.52	5452.73	14517.5	14581.9	15002.3	21448.6	17703.5	20417.9	19969	19133.7	18065.4	9002.43	8300.25	7385.65	400.152	460.485	506.347	554.764	601.007	741.652	508.527	408.512
pgaptmp_002606	pgaptmp_002606	pgaptmp_002606	protein_coding	protein_coding	pgaptmp_002606	0.4648	654				TRUE	1.84976	2.67408e-05	0.000150235	Chromosome_I	2814563	2815216	654	-	10.5949	1692.95	1053.5	1083.12	809.089	888.914	456.042	708.304	1211.99	1145.02	2244.02	1984.65	2163.83	3786.86	4493.02	4384.49	2978.16	3212.92	3474.17	613.015	814.287	1255.31	106.665	66.573	69.1256	66.6473	70.279	34.1318	51.5674	80.53
[truncated: 4,343 more rows]
[truncated: 14 more columns]
