# Supplementary material for: Phage Resistance in Vibrio harveyi: Evolutionary strategies and physiological trade-offs
Source: Research Square preprint supplement (doi:10.21203/rs.3.rs-7655806/v1), 2025-10-10
Supplement: Supplementary file 3 [file 1c8d45f393b7e4802af35b69.xlsx]

## Sheet: Sheet1
gene_id	transcript_id	gene_name	type	biotypes	description	gc	featWidth	GO BP	GO MF	GO CC	isPresent	log2 Ratio	pValue	fdr	seqnames	start	end	width	strand	log2 Mean	R10D4_1 [normalized count]	R10D4_2 [normalized count]	R10D4_3 [normalized count]	R3D4_1 [normalized count]	R3D4_2 [normalized count]	R3D4_3 [normalized count]	R4D4_1 [normalized count]	R4D4_2 [normalized count]	R4D4_3 [normalized count]	VH2_T10_1 [normalized count]	VH2_T10_2 [normalized count]	VH2_T10_3 [normalized count]	VH2_T25_1 [normalized count]	VH2_T25_2 [normalized count]	VH2_T25_3 [normalized count]	VH2_T45_1 [normalized count]	VH2_T45_2 [normalized count]	VH2_T45_3 [normalized count]	VH2_WT1 [normalized count]	VH2_WT2 [normalized count]	VH2_WT3 [normalized count]	R10D4_1 [FPKM]	R10D4_2 [FPKM]	R10D4_3 [FPKM]	R3D4_1 [FPKM]	R3D4_2 [FPKM]	R3D4_3 [FPKM]	R4D4_1 [FPKM]	R4D4_2 [FPKM]
pgaptmp_004581	pgaptmp_004581	artM	protein_coding	protein_coding	pgaptmp_004581	0.4783	669	GO:0071705	GO:0022857	GO:0016020,GO:0043190	TRUE	3.42918	3.87309e-08	0.000130613	Chromosome_II	1470226	1470894	669	-	11.4298	6606.81	7763.51	6876.9	8609.14	11072.5	8061.14	11690.7	16096.2	12957.6	1124.03	1603.68	1526.53	913.206	769.186	839.218	1371.94	1380.77	1386.49	794.069	912.409	870.659	406.934	479.594	429.05	693.263	855.783	589.797	832.048	1045.52
pgaptmp_004582	pgaptmp_004582	artQ	protein_coding	protein_coding	pgaptmp_004582	0.4652	690	GO:0055085,GO:0071705	GO:0022857	GO:0016020,GO:0043190	TRUE	3.52914	4.9625e-08	0.000130613	Chromosome_II	1470891	1471580	690	-	11.8402	10252.5	11446.8	10426	13449.6	16490.6	12772.5	17487.8	25378.6	20893.9	1307.67	1861.29	1850.74	1048.71	873.52	865.567	1486.55	1491.29	1472.49	1073.47	1262.85	1377.44	612.264	685.609	630.682	1050.08	1235.76	906.063	1206.76	1598.29
pgaptmp_000765	pgaptmp_000765	argA	protein_coding	protein_coding	pgaptmp_000765	0.4589	1338	GO:0006526	GO:0004042		TRUE	2.80566	1.42843e-07	0.00016684	Chromosome_I	811229	812566	1338	-	11.4376	13431	14332.7	15924.1	11941.6	12283	9677.49	18104.1	20529.9	19280.2	641.725	807.284	691.016	500.791	419.556	469.014	810.694	790.915	658.849	1550.7	1778.31	1545.25	413.629	442.704	496.753	480.806	474.67	354.029	644.248	666.758
pgaptmp_000306	pgaptmp_000306	argC	protein_coding	protein_coding	pgaptmp_000306	0.4657	1005	GO:0006526,GO:0006592	GO:0003942,GO:0070401		TRUE	2.93863	1.51958e-07	0.00016684	Chromosome_I	322301	323305	1005	+	12.7476	29874	31210.7	34402.5	24842.8	24187.7	21462.8	42245.1	44671.9	42059.5	2022.04	2000.98	2141.6	1279.96	1428.49	1467.64	2764.11	2520.54	2459.44	2751.02	3287.73	3233.4	1224.86	1283.45	1428.78	1331.68	1244.44	1045.33	2001.44	1931.55
pgaptmp_000746	pgaptmp_000746	glpD	protein_coding	protein_coding	pgaptmp_000746	0.4705	1560	GO:0006072	GO:0004368	GO:0009331	TRUE	3.12495	1.58472e-07	0.00016684	Chromosome_I	781702	783261	1560	-	11.6204	24928.6	22165.7	18683.4	9672.55	8956.73	6257.59	12715.3	13796.1	13225	599.347	1043.12	820.698	1097.32	1301.96	1400.45	996.092	930.723	2669.79	955.565	920.055	981.984	658.462	587.218	499.887	334.026	296.872	196.343	388.093	384.298
pgaptmp_002672	pgaptmp_002672	pgaptmp_002672	protein_coding	protein_coding	pgaptmp_002672	0.4587	1524			GO:0016020	TRUE	3.13065	2.67707e-07	0.000220044	Chromosome_I	2893073	2894596	1524	-	11.5118	15318.2	20098.3	22140.2	17869.1	16066	21691.3	29606.2	28362.3	25291	484.321	513.396	509.463	391.795	341.86	345.173	487.091	532.602	433.94	2119.57	2341.55	1967.29	414.173	545.026	606.37	631.659	545.088	696.679	924.977	808.712
pgaptmp_002671	pgaptmp_002671	pgaptmp_002671	protein_coding	protein_coding	pgaptmp_002671	0.4956	1695				TRUE	2.28619	2.92611e-07	0.000220044	Chromosome_I	2891177	2892871	1695	-	9.89031	2756.05	2908.79	2920.17	2556.67	2671.52	2240.62	3308.39	3160.57	3426.61	334.989	301.144	314.94	381.485	389.588	405.776	498.889	446.054	451.139	454.313	575.99	499.3	67.0001	70.9225	71.9084	81.2585	81.4953	64.7042	92.9351	81.0277
pgaptmp_004584	pgaptmp_004584	artP	protein_coding	protein_coding	pgaptmp_004584	0.4444	729	GO:0003333	GO:0005524,GO:0015424	GO:0043190	TRUE	3.21191	4.34468e-07	0.000276692	Chromosome_II	1472402	1473130	729	-	11.4342	9717.48	10265.7	10068.3	12387.4	14036.9	8603.77	15955.4	19130.6	18109.8	1105.87	1364.22	1196.77	673.122	578.277	699.568	620.24	707.03	538.457	1075.15	1225.89	1486.27	549.268	581.972	576.458	915.416	995.607	577.689	1042.11	1140.35
pgaptmp_004583	pgaptmp_004583	pgaptmp_004583	protein_coding	protein_coding	pgaptmp_004583	0.4385	732				TRUE	3.33795	4.73067e-07	0.000276692	Chromosome_II	1471582	1472313	732	-	11.9509	14981.3	15185.5	14869.6	20458.5	22028.3	13011.6	23045.9	32620.7	30002.7	1172.46	1493.02	1376.48	771.807	762.526	803.647	1075.31	1179.71	891.695	1628.93	1770.66	2105.2	843.331	857.355	847.869	1505.66	1556.01	870.068	1499.05	1936.51
pgaptmp_002372	pgaptmp_002372	pgaptmp_002372	protein_coding	protein_coding	pgaptmp_002372	0.4236	720				TRUE	-1.81316	8.9088e-07	0.000468959	Chromosome_I	2586261	2586980	720	-	9.98723	736.231	903	1063.51	397.818	384.377	436.25	432.853	385.836	395.513	678.049	685.738	694.722	1861.76	1814.75	2204.1	3396.15	3288.82	5080.28	1488.67	1483.3	1416.48	42.1347	51.8319	61.6526	29.7657	27.6038	29.6576	28.6247	23.2867
pgaptmp_002264	pgaptmp_002264	pgaptmp_002264	protein_coding	protein_coding	pgaptmp_002264	0.4384	771				TRUE	1.6573	1.69887e-06	0.000812988	Chromosome_I	2454086	2454856	771	-	8.2783	664.535	680.33	751.484	619.468	652.007	515.418	629.604	654.503	662.238	145.296	190.483	163.028	162.021	160.941	169.952	195.511	223.693	183.895	168.761	198.793	190.249	35.5158	36.4676	40.6824	43.2842	43.7262	32.7219	38.8817	36.8888
pgaptmp_004145	pgaptmp_004145	pgaptmp_004145	protein_coding	protein_coding	pgaptmp_004145	0.4605	519	GO:0033103			TRUE	-3.31126	1.99371e-06	0.000857263	Chromosome_II	980332	980850	519	+	7.58798	76.3214	88.8918	115.173	154.387	161.124	262.245	412.806	297.773	263.206	155.386	170.527	81.514	122.252	132.082	82.9996	67.4174	74.5643	43.6586	2552.64	1903.83	1551.07	6.0595	7.07841	9.26243	16.0253	16.0523	24.7327	37.8714	24.9319
pgaptmp_002263	pgaptmp_002263	pgaptmp_002263	protein_coding	protein_coding	pgaptmp_002263	0.4397	771	GO:0006865		GO:0030288,GO:0055052	TRUE	1.58707	2.1171e-06	0.000857263	Chromosome_I	2453236	2454006	771	-	8.20945	606.716	654.807	624.059	578.47	534.577	493.152	556.843	644.801	686.166	175.566	174.156	194.522	178.223	153.171	137.015	170.229	219.698	174.635	167.084	194.97	164.495	32.4257	35.0995	33.7841	40.4194	35.8509	31.3083	34.3883	36.342
pgaptmp_003883	pgaptmp_003883	pgaptmp_003883	protein_coding	protein_coding	pgaptmp_003883	0.4942	1908	GO:0009401	GO:0022877	GO:0016020	TRUE	2.34727	3.43326e-06	0.00129091	Chromosome_II	650516	652423	1908	-	10.5817	2861.67	2081.48	1560.96	2041.62	2343.81	1780.46	2312.75	3540.44	3101.47	1909.03	2663.13	1839.62	838.088	893.499	752.266	1690.49	1149.09	6191.59	302.875	379.109	525.054	61.8015	45.0853	34.1472	57.6449	63.5167	45.6758	57.7144	80.6336
pgaptmp_004152	pgaptmp_004152	tssA	protein_coding	protein_coding	pgaptmp_004152	0.4569	1578				TRUE	-1.61026	3.80637e-06	0.0013227	Chromosome_II	989039	990616	1578	+	7.4582	110.242	99.4532	96.386	181.933	187.751	183.901	227.192	258.219	270.244	135.206	156.014	124.124	103.104	134.302	100.126	133.149	139.808	88.6403	505.723	558.787	687.887	2.87871	2.60467	2.54946	6.2111	6.15203	5.7044	6.85518	7.1108
pgaptmp_000430	pgaptmp_000430	pgaptmp_000430	protein_coding	protein_coding	pgaptmp_000430	0.4687	1005	GO:0006520,GO:0006591	GO:0004585,GO:0016597		TRUE	3.15765	4.02037e-06	0.0013227	Chromosome_I	463131	464135	1005	-	12.1547	28576.6	24672.3	27236.4	20683.3	21990	12215.8	27487.3	35642.4	34932.5	1138.15	1298.91	1393.15	985.379	895.719	986.773	996.092	1295.56	1006.79	1419.38	2369.59	2378.53	1171.66	1014.58	1131.16	1108.71	1131.37	594.962	1302.26	1541.13
pgaptmp_001963	pgaptmp_001963	pgaptmp_001963	protein_coding	protein_coding	pgaptmp_001963	0.4408	735				TRUE	-2.2293	5.22529e-06	0.001618	Chromosome_I	2123423	2124157	735	-	7.04772	102.533	139.939	156.832	92.8882	96.9476	118.752	83.8977	89.5557	85.1549	66.5941	85.2637	85.2192	110.469	98.7843	102.761	150.004	162.444	116.423	652.131	507.814	379.667	5.74822	7.8685	8.90609	6.80828	6.82014	7.90838	5.43495	5.29473
pgaptmp_000750	pgaptmp_000750	glpT	protein_coding	protein_coding	pgaptmp_000750	0.4686	1368	GO:0015794	GO:0015169	GO:0016020	TRUE	1.8295	5.91328e-06	0.00172931	Chromosome_I	787727	789094	1368	+	9.45868	1743.83	1811.28	1674.5	811.01	785.139	1042.38	882.039	850.78	838.881	433.871	741.976	327.909	649.555	437.315	403.141	896.652	969.336	1760.9	215.142	278.438	245.081	52.5262	54.7194	51.0906	31.9378	29.6759	37.2969	30.6997	27.0252
pgaptmp_004153	pgaptmp_004153	tssB	protein_coding	protein_coding	pgaptmp_004153	0.4556	507	GO:0033103	GO:0003674		TRUE	-2.53344	7.1196e-06	0.0019725	Chromosome_II	990643	991149	507	+	6.5587	65.5284	41.3655	38.391	101.857	98.313	61.0255	142.552	201.5	199.164	78.7021	61.6801	55.5777	61.8624	58.8266	25.0316	60.6757	62.5808	43.6586	379.432	544.77	702.01	5.32574	3.37188	3.16055	10.823	10.0264	5.89164	13.3874	17.2705
pgaptmp_005256	pgaptmp_005256	speF	protein_coding	protein_coding	pgaptmp_005256	0.4649	2181	GO:0006520	GO:0004586		TRUE	-1.38835	9.46772e-06	0.00249124	Chromosome_II	2234718	2236898	2181	-	7.53466	288.325	271.956	218.911	226.135	206.867	204.518	357.864	287.325	292.764	108.972	78.0072	74.1036	82.4832	65.4862	98.809	124.722	101.194	95.2552	496.782	576.627	648.84	5.44735	5.15329	4.1894	5.58568	4.90433	4.58995	7.8126	5.72473
pgaptmp_000308	pgaptmp_000308	pgaptmp_000308	protein_coding	protein_coding	pgaptmp_000308	0.4658	1215	GO:0006526	GO:0004055,GO:0005524		TRUE	3.2421	9.93844e-06	0.00249124	Chromosome_I	324209	325423	1215	+	11.6607	20102.6	17591.8	14378.7	15224.7	18203.6	8273.9	12803.7	24123.3	22663.9	734.553	937.901	991.136	793.9	627.114	661.362	955.642	1007.95	1018.7	984.624	1497.96	1924.09	681.764	598.377	493.951	675.051	774.685	333.324	501.754	862.777
pgaptmp_000751	pgaptmp_000751	glpQ	protein_coding	protein_coding	pgaptmp_000751	0.4593	1056	GO:0006629	GO:0008081		TRUE	1.17046	1.2079e-05	0.00289018	Chromosome_I	789148	790203	1056	+	8.73395	925.878	859.874	893.613	465.082	423.292	402.438	394.245	458.227	444.776	393.511	542.422	329.761	380.012	341.86	268.761	487.091	544.586	769.98	181.054	195.607	191.911	36.1284	33.6521	35.3205	23.7263	20.7262	18.6538	17.776	18.8562
pgaptmp_000309	pgaptmp_000309	argH	protein_coding	protein_coding	pgaptmp_000309	0.4821	1875	GO:0042450	GO:0004056		TRUE	2.33452	1.26715e-05	0.00290013	Chromosome_I	325674	327548	1875	+	12.7254	28040.8	24722.5	21808.6	15109.4	18420.7	9776.45	24665.9	39322.4	34445.5	2244.02	2851.8	2702.93	2705.74	2344.19	2399.08	2969.74	3495.2	3232.06	2307.33	3002.92	3301.53	616.236	544.92	485.475	434.12	507.983	255.219	626.367	911.332
pgaptmp_004379	pgaptmp_004379	pgaptmp_004379	protein_coding	protein_coding	pgaptmp_004379	0.4247	372				TRUE	-2.04987	1.34433e-05	0.00294783	Chromosome_II	1244192	1244563	372	+	6.81617	51.6518	66.0088	62.896	84.5603	62.8111	93.1876	69.0485	62.689	59.1158	62.5581	92.5202	55.5777	106.05	124.313	154.142	261.243	213.041	230.2	451.519	347.251	274.989	5.72138	7.33331	7.05701	12.2458	8.73047	12.2616	8.8378	7.32295
pgaptmp_000800	pgaptmp_000800	pgaptmp_000800	protein_coding	protein_coding	pgaptmp_000800	0.4604	669				TRUE	-1.28932	1.39999e-05	0.00294783	Chromosome_I	846285	846953	669	-	8.45316	249.779	284.278	272.005	253.681	223.935	230.083	292.528	262.697	259.687	302.701	341.055	324.203	481.643	478.383	495.363	396.077	424.75	384.99	668.337	546.681	564.931	15.3847	17.5614	16.9704	20.428	17.3077	16.8341	20.8197	17.0634
pgaptmp_000307	pgaptmp_000307	argB	protein_coding	protein_coding	pgaptmp_000307	0.4975	792	GO:0006592	GO:0003991	GO:0005737	TRUE	3.17763	1.47994e-05	0.00297602	Chromosome_I	323327	324118	792	+	11.251	14868.8	11207.4	10279	9217.08	9872.95	4787.2	10937.9	20318	18469.5	631.635	760.117	724.363	746.767	591.596	657.409	842.718	930.723	928.738	531.987	939.807	1162.26	773.586	584.819	541.71	626.949	644.563	295.862	657.568	1114.79
pgaptmp_004154	pgaptmp_004154	tssC	protein_coding	protein_coding	pgaptmp_004154	0.4573	1476	GO:0033103	GO:0003674	GO:0033104	TRUE	-2.73821	1.53721e-05	0.00297602	Chromosome_II	991158	992633	1476	+	7.48684	132.599	75.6901	73.5148	172.964	189.799	84.1162	260.603	367.179	350.472	159.422	99.7767	113.008	111.941	145.402	77.7298	129.779	111.846	78.0564	772.276	1005.43	1340.05	3.70178	2.11931	2.07888	6.31298	6.64892	2.7895	8.40669	10.8101
pgaptmp_003729	pgaptmp_003729	pgaptmp_003729	protein_coding	protein_coding	pgaptmp_003729	0.4146	246				TRUE	1.47584	1.58299e-05	0.00297602	Chromosome_II	487726	487971	246	+	7.79819	310.682	364.368	325.916	653.421	579.637	750.448	857.538	595.546	669.275	70.6301	126.989	66.6933	50.0791	62.1564	47.4283	239.332	159.781	108.485	264.317	234.474	211.018	52.0402	61.2135	55.2982	143.094	121.833	149.32	165.978	105.2
pgaptmp_001897	pgaptmp_001897	pgaptmp_001897	protein_coding	protein_coding	pgaptmp_001897	0.4514	627				TRUE	1.32957	2.29025e-05	0.00415719	Chromosome_I	2038632	2039258	627	-	8.21266	624.447	839.631	825.816	694.42	728.472	513.769	671.924	600.77	687.573	203.818	132.431	138.944	159.075	186.469	135.698	106.182	86.5479	105.839	271.023	261.235	231.788	41.038	55.343	54.9739	59.6649	60.0744	40.1082	51.0253	41.6369
pgaptmp_002262	pgaptmp_002262	pgaptmp_002262	protein_coding	protein_coding	pgaptmp_002262	0.4453	741				TRUE	1.0869	2.40407e-05	0.00421835	Chromosome_I	2452414	2453154	741	-	8.36033	549.668	549.193	537.475	451.629	495.662	411.51	503.386	579.127	481.372	248.214	283.003	264.921	201.789	202.008	258.221	254.501	271.627	247.399	219.612	219.819	195.234	30.5661	30.6301	30.2748	32.8343	34.5868	27.1828	32.3456	33.962
pgaptmp_000429	pgaptmp_000429	pgaptmp_000429	protein_coding	protein_coding	pgaptmp_000429	0.4048	126				TRUE	2.82737	2.53685e-05	0.00430773	Chromosome_I	462936	463061	126	-	8.9824	2439.97	2176.53	2005.32	1784.74	1730.04	758.695	2061.06	3018.77	3012.09	193.728	161.457	224.164	126.671	155.391	159.412	178.656	234.345	190.51	133.556	228.102	225.973	797.944	713.897	664.284	763.076	709.951	294.734	778.849	1041.11
pgaptmp_004161	pgaptmp_004161	pgaptmp_004161	protein_coding	protein_coding	pgaptmp_004161	0.47	600				TRUE	-1.221	2.83508e-05	0.00458205	Chromosome_II	1001787	1002386	600	+	4.24311	10.7929	13.2018	11.4356	15.3746	12.2891	15.6687	22.2737	25.3741	30.9654	24.216	18.1412	20.3785	16.2021	24.4186	15.8094	10.1126	15.9781	2.64598	43.5872	42.6895	43.2006	0.741218	0.909331	0.795518	1.38044	1.05904	1.27825	1.76756	1.83771
pgaptmp_002758	pgaptmp_002758	pgaptmp_002758	protein_coding	protein_coding	pgaptmp_002758	0.4613	1485				TRUE	1.37777	2.87249e-05	0.00458205	Chromosome_I	2985442	2986926	1485	+	10.7767	10150.7	12932.4	13436.1	4914.11	4113.44	5030.48	10186.5	8376.45	7632.98	193.728	547.865	329.761	366.756	300.793	287.205	283.153	327.55	1793.97	1785.96	1997.49	1688.15	281.663	359.911	377.647	178.272	143.226	165.812	326.612	245.116
pgaptmp_004449	pgaptmp_004449	yfcC	protein_coding	protein_coding	pgaptmp_004449	0.4853	1533			GO:0016020	TRUE	1.24163	3.40399e-05	0.00527018	Chromosome_II	1317004	1318536	1533	+	11.0745	2471.58	2824.3	3136.63	3320.91	3709.27	3198.06	2942.36	3194.15	2956.49	1987.73	2024.56	2197.17	1766.02	1510.62	1781.2	1430.93	1384.77	1678.87	1246.15	1579.51	1531.13	66.434	76.1394	85.4008	116.702	125.109	102.112	91.3874	90.5422
pgaptmp_004580	pgaptmp_004580	pgaptmp_004580	protein_coding	protein_coding	pgaptmp_004580	0.4607	573				TRUE	1.38262	4.07929e-05	0.00598701	Chromosome_II	1469515	1470087	573	-	6.74884	107.929	115.295	101.287	112.747	118.112	92.3629	120.278	158.961	169.606	157.404	107.033	155.618	86.9019	86.575	114.618	210.679	214.372	141.56	38.5579	28.6721	45.693	7.76144	8.3157	7.37802	10.6002	10.6582	7.88998	9.99458	12.0552
pgaptmp_003884	pgaptmp_003884	pgaptmp_003884	protein_coding	protein_coding	pgaptmp_003884	0.427	843	GO:0006355	GO:0003700,GO:0043565		TRUE	1.25722	4.09446e-05	0.00598701	Chromosome_II	652806	653648	843	+	10.2996	3294.92	3692.97	3185.64	4187.02	3417.06	4112.62	6110.42	5035.27	5651.19	298.665	319.285	261.215	195.898	213.108	183.126	810.694	501.978	900.956	1557.96	1720.32	1679.01	161.056	181.046	157.728	267.572	209.589	238.794	345.125	259.557
pgaptmp_000190	pgaptmp_000190	pgaptmp_000190	protein_coding	protein_coding	pgaptmp_000190	0.4803	381				TRUE	-1.20483	4.87459e-05	0.00693509	Chromosome_I	207723	208103	381	-	7.51416	322.246	330.044	441.905	125.559	109.237	143.492	317.772	321.654	301.209	76.6841	88.892	68.5459	141.4	185.359	162.047	89.3281	162.444	121.715	292.258	284.172	334.805	34.8514	35.8004	48.4111	17.7537	14.8248	18.4347	39.7121	36.6861
pgaptmp_002169	pgaptmp_002169	pgaptmp_002169	protein_coding	protein_coding	pgaptmp_002169	0.4036	441				TRUE	-1.1661	5.12988e-05	0.00710623	Chromosome_I	2352114	2352554	441	-	8.00806	437.113	328.284	472.128	329.273	291.525	229.258	286.589	313.445	347.657	167.494	150.572	185.259	82.4832	77.6955	104.079	205.623	248.992	186.541	670.013	623.777	657.979	40.8426	30.7647	44.6851	40.2237	34.1808	25.4459	30.9423	30.8859
pgaptmp_001140	pgaptmp_001140	ati1	protein_coding	protein_coding	pgaptmp_001140	0.4133	450				TRUE	-1.12741	5.84928e-05	0.00789503	Chromosome_I	1210605	1211054	450	-	9.03876	934.358	917.082	973.662	590	577.589	492.327	601.39	749.283	794.544	407.637	555.121	437.211	125.198	162.051	159.412	365.74	350.186	349.269	1176.85	1101.01	1410.67	85.5577	84.2243	90.3102	70.6324	66.3667	53.5518	63.6322	72.3554
pgaptmp_001567	pgaptmp_001567	pgaptmp_001567	protein_coding	protein_coding	pgaptmp_001567	0.4115	384				TRUE	2.05924	7.5148e-05	0.00988947	Chromosome_I	1627314	1627697	384	-	10.698	2719.04	3514.31	4085.79	2595.11	2681.08	4248.69	5131.86	3680.74	3661.66	918.192	1101.17	980.021	820.413	897.939	873.472	1505.09	1326.18	988.273	1032.12	692.59	583.209	291.772	378.225	444.105	364.073	361.012	541.573	636.322	416.525
pgaptmp_004786	pgaptmp_004786	pgaptmp_004786	protein_coding	protein_coding	pgaptmp_004786	0.4634	1092		GO:0015288	GO:0009279	TRUE	0.965796	8.3336e-05	0.0106995	Chromosome_II	1710463	1711554	1092	-	7.8914	178.083	211.228	204.208	545.158	594.657	519.541	469.233	483.601	475.741	129.152	134.245	172.291	166.439	139.852	175.221	114.61	111.846	142.883	291.14	306.473	250.065	6.71983	7.99412	7.80531	26.8945	28.1571	23.2879	20.4597	19.2443
pgaptmp_003882	pgaptmp_003882	manA	protein_coding	protein_coding	pgaptmp_003882	0.4655	1233	GO:0005975	GO:0004476,GO:0008270		TRUE	1.32694	9.86538e-05	0.0123646	Chromosome_II	649206	650438	1233	-	8.45735	572.025	425.096	282.623	575.266	491.565	345.536	455.869	629.129	549.636	484.321	515.211	361.255	200.316	246.406	181.809	247.759	187.742	1091.47	202.289	160.564	192.741	19.1166	14.2484	9.56723	25.1345	20.614	13.7171	17.6039	22.1725
pgaptmp_004164	pgaptmp_004164	tssK	protein_coding	protein_coding	pgaptmp_004164	0.4517	1326	GO:0033103	GO:0003674		TRUE	-0.856055	0.00010189	0.0124732	Chromosome_II	1004415	1005740	1326	+	6.38885	65.5284	68.6491	68.6138	90.9664	94.2167	79.1682	118.051	96.2724	99.9338	60.5401	87.0778	72.251	45.6603	59.9366	60.6029	79.2155	69.2383	48.9506	163.731	166.935	169.479	2.03631	2.1396	2.15978	3.69574	3.67391	2.9224	4.23895	3.15497
pgaptmp_004151	pgaptmp_004151	pgaptmp_004151	protein_coding	protein_coding	pgaptmp_004151	0.4343	2001				TRUE	-0.944216	0.000119097	0.0142483	Chromosome_II	987039	989039	2001	+	6.87261	67.8412	84.4912	78.4158	158.23	148.152	124.525	152.946	129.856	182.977	102.918	96.1484	68.5459	86.9019	89.9048	75.0949	77.53	103.857	64.8265	274.376	266.332	316.528	1.39703	1.74504	1.63568	4.25997	3.82829	3.04609	3.63935	2.82002
pgaptmp_004505	pgaptmp_004505	pgaptmp_004505	protein_coding	protein_coding	pgaptmp_004505	0.4688	192				TRUE	1.04932	0.000134561	0.0155475	Chromosome_II	1382109	1382300	192	-	8.94937	988.323	1368.58	1329.8	1586.79	1589.39	1800.25	1752.94	1512.75	1270.29	171.53	268.49	250.1	104.577	103.224	118.571	129.779	141.14	89.9633	901.92	814.924	707.826	212.107	294.585	289.085	445.227	428.03	458.949	434.709	342.375
pgaptmp_000204	pgaptmp_000204	pgaptmp_000204	protein_coding	protein_coding	pgaptmp_000204	0.4529	510				TRUE	-1.55367	0.000138748	0.0155475	Chromosome_I	222218	222727	510	+	8.62151	281.387	354.687	445.99	338.241	330.441	534.385	498.931	405.24	365.251	201.8	261.234	214.901	312.258	235.307	301.697	320.233	387.468	283.12	1427.2	1144.97	1057.58	22.7348	28.742	36.5002	35.729	33.5018	51.2882	46.5804	34.5286
pgaptmp_001859	pgaptmp_001859	pgaptmp_001859	protein_coding	protein_coding	pgaptmp_001859	0.4836	852				TRUE	1.35151	0.000138817	0.0155475	Chromosome_I	1989826	1990677	852	-	7.20915	844.16	543.912	378.193	442.02	534.577	315.848	282.876	545.544	418.737	54.4861	47.1672	44.4622	44.1874	52.167	55.3331	28.6524	41.2767	46.3046	144.732	149.732	203.541	40.8266	26.3834	18.5274	27.949	32.4425	18.1456	15.8085	27.8245
pgaptmp_003171	pgaptmp_003171	edd	protein_coding	protein_coding	pgaptmp_003171	0.5214	1797	GO:0009255	GO:0004456		TRUE	-1.0639	0.000148513	0.0162869	Chromosome_I	3437890	3439686	1797	+	11.9592	2190.19	1680.14	1856.66	1177.44	1411.88	1285.66	1461.9	1820.97	1889.59	5763.42	7363.52	8090.26	8862.52	8340.06	11309	15507.7	16755.7	36097.8	2638.7	2382.33	3190.2	50.2218	38.6402	43.1245	35.2983	40.6251	35.0195	38.7348	44.0343
pgaptmp_001331	pgaptmp_001331	pgaptmp_001331	protein_coding	protein_coding	pgaptmp_001331	0.3844	333				TRUE	0.918598	0.000154123	0.0163688	Chromosome_I	1403246	1403578	333	+	8.3976	447.135	543.032	487.648	474.05	507.268	508.821	475.173	458.227	482.075	371.313	317.471	153.765	279.854	216.438	135.698	417.988	378.148	178.604	300.081	241.483	245.911	55.329	67.3943	61.1228	76.691	78.7657	74.7917	67.9423	59.7962
pgaptmp_002371	pgaptmp_002371	pgaptmp_002371	protein_coding	protein_coding	pgaptmp_002371	0.4596	792	GO:0019290	GO:0008667		TRUE	-0.997482	0.00015602	0.0163688	Chromosome_I	2585445	2586236	792	+	7.83632	282.929	259.634	309.579	189.62	207.55	146.791	239.071	202.993	225.203	161.44	157.829	96.3347	163.493	267.495	329.363	183.712	226.356	291.058	329.698	395.038	391.298	14.7201	13.5481	16.315	12.898	13.5501	9.07208	14.3726	11.1376
pgaptmp_004398	pgaptmp_004398	uhpA	protein_coding	protein_coding	pgaptmp_004398	0.4713	609	GO:0006355	GO:0003677		TRUE	0.984382	0.000158588	0.0163688	Chromosome_II	1263957	1264565	609	+	6.89681	100.991	176.903	119.257	221.01	210.281	214.414	140.324	154.484	179.459	80.7201	94.3343	142.65	76.5915	71.0359	84.317	99.4407	95.8684	71.4414	120.703	111.503	87.2321	6.83318	12.005	8.17351	19.5505	17.8536	17.2333	10.9711	11.0231
pgaptmp_003957	pgaptmp_003957	pgaptmp_003957	protein_coding	protein_coding	pgaptmp_003957	0.4248	306				TRUE	1.11179	0.000163775	0.016488	Chromosome_II	726146	726451	306	-	7.41196	133.37	168.102	143.762	277.384	221.204	305.127	386.078	238.069	319.507	209.872	154.2	96.3347	83.9561	130.972	80.3647	241.017	198.394	149.498	138.026	113.414	114.648	17.9595	22.7036	19.6094	48.8341	37.378	48.8082	60.0739	33.808
pgaptmp_003484	pgaptmp_003484	pgaptmp_003484	protein_coding	protein_coding	pgaptmp_003484	0.465	1086	GO:0007165		GO:0016020	TRUE	0.914577	0.000166007	0.016488	Chromosome_II	230972	232057	1086	-	8.32015	319.933	396.053	322.648	680.326	593.292	521.191	648.165	614.203	589.047	215.926	179.598	170.438	194.425	202.008	126.476	311.806	258.312	215.647	316.287	331.959	304.066	12.1391	15.0718	12.4005	33.7483	28.2477	23.4909	28.4177	24.5765
pgaptmp_005188	pgaptmp_005188	pgaptmp_005188	protein_coding	protein_coding	pgaptmp_005188	0.4689	981				TRUE	-1.03263	0.000186162	0.0177746	Chromosome_II	2158605	2159585	981	+	11.1252	1848.67	1640.54	1437.62	1233.17	1492.45	1232.88	1622.27	1734.4	1787.55	3472.98	3272.68	3303.17	3509.95	3877.01	3766.6	2170.84	2410.03	2112.81	2446.47	2547.36	3204.32	77.6514	69.1129	61.1669	67.7203	78.6636	61.5155	78.7384	76.8275
pgaptmp_001139	pgaptmp_001139	ati2	protein_coding	protein_coding	pgaptmp_001139	0.412	1488				TRUE	-0.960351	0.000187175	0.0177746	Chromosome_I	1209075	1210562	1488	-	11.3684	4661	4917.21	5230.98	2930.78	2844.25	2450.92	3285.37	3994.19	3835.49	2024.06	2869.94	2419.48	745.294	885.729	806.282	1781.51	1746.94	1624.63	5687.01	4978.11	5523.04	129.073	136.571	146.731	106.107	98.8346	80.6228	105.127	116.644
pgaptmp_002150	pgaptmp_002150	pgaptmp_002150	protein_coding	protein_coding	pgaptmp_002150	0.457	291				TRUE	-1.30078	0.00019198	0.0177746	Chromosome_I	2336367	2336657	291	-	8.60446	629.073	483.184	430.47	283.149	296.987	185.55	335.591	473.899	479.964	520.645	471.672	457.59	179.695	226.427	226.602	374.167	402.115	374.406	564.957	572.804	794.227	89.0771	68.6217	61.7434	52.4187	52.7702	31.2106	54.9098	70.7669
pgaptmp_000747	pgaptmp_000747	pgaptmp_000747	protein_coding	protein_coding	pgaptmp_000747	0.4394	792				TRUE	0.867222	0.000194498	0.0177746	Chromosome_I	783442	784233	792	-	10.5187	2338.21	2737.16	2770.69	2177.43	2156.06	1919.83	2371.41	2238.89	2381.52	990.84	968.741	954.084	873.438	955.655	1001.26	1109.02	1099.82	1072.94	1086.33	1223.98	1143.99	121.651	142.829	146.017	148.11	140.76	118.651	142.565	122.842
pgaptmp_001857	pgaptmp_001857	pgaptmp_001857	protein_coding	protein_coding	pgaptmp_001857	0.492	498				TRUE	0.850508	0.000195845	0.0177746	Chromosome_I	1988600	1989097	498	-	5.58589	161.123	128.497	104.554	88.404	96.9476	89.0642	50.4871	107.467	91.4887	28.252	30.8401	25.9363	5.89165	18.8689	34.2538	32.0233	25.2986	17.1989	43.0284	50.3354	51.5085	13.3317	10.6636	8.76302	9.56328	10.0659	8.754	4.82707	9.37741
pgaptmp_003841	pgaptmp_003841	pgaptmp_003841	protein_coding	protein_coding	pgaptmp_003841	0.4281	1488				TRUE	0.880432	0.000204117	0.0182114	Chromosome_II	607841	609328	1488	-	8.99785	317.62	409.254	369.208	518.893	450.601	448.62	343.015	256.726	307.543	645.761	520.653	605.797	677.54	910.148	959.106	1390.48	1236.97	1534.67	285.552	244.031	240.096	8.79556	11.3666	10.3564	18.7862	15.6579	14.7573	10.976	7.4973
pgaptmp_000303	pgaptmp_000303	pgaptmp_000303	protein_coding	protein_coding	pgaptmp_000303	0.4685	540		GO:0003677		TRUE	-1.34873	0.000209646	0.018393	Chromosome_I	317130	317669	540	-	12.7253	2176.31	2408.88	2967.55	4400.98	3883.36	5122.84	3932.8	3362.82	3265.44	8802.53	9950.46	12030.7	10974.7	13433.6	14451.2	10397.5	11349.8	11975.7	14249.1	10552.6	9882.15	166.068	184.358	229.374	439.056	371.842	464.355	346.769	270.612
pgaptmp_003887	pgaptmp_003887	pgaptmp_003887	protein_coding	protein_coding	pgaptmp_003887	0.5005	1872	GO:0009401	GO:0022877	GO:0016020	TRUE	1.08229	0.000215056	0.0185583	Chromosome_II	654994	656865	1872	+	9.81579	865.746	851.073	831.534	1125.55	919.637	1255.15	1617.81	1372.44	1357.55	714.373	709.322	629.881	729.092	792.495	739.092	1304.53	1033.25	1748.99	491.194	497.62	583.209	19.0565	18.789	18.5402	32.3909	25.4012	32.8187	41.1487	31.8585
pgaptmp_001397	pgaptmp_001397	pgaptmp_001397	protein_coding	protein_coding	pgaptmp_001397	0.4122	723		GO:0003676,GO:0004519,GO:0008270		TRUE	0.745608	0.000223077	0.0189399	Chromosome_I	1454211	1454933	723	+	7.00897	166.519	201.547	229.529	240.228	237.59	225.135	200.463	179.111	190.015	68.6121	59.866	51.8725	119.306	86.575	92.2218	75.8446	79.8904	76.7334	144.732	136.989	133.756	9.4904	11.5207	13.2508	17.8999	16.9916	15.2418	13.2017	10.7652
pgaptmp_003886	pgaptmp_003886	pgaptmp_003886	protein_coding	protein_coding	pgaptmp_003886	0.4733	300	GO:0009401,GO:0016310	GO:0016301,GO:0022877,GO:0090563,GO:0090582		TRUE	0.900539	0.000230599	0.0192678	Chromosome_II	654461	654760	300	-	8.36352	640.637	720.816	615.89	788.589	698.432	578.917	1139.67	920.932	993.708	115.026	125.174	120.418	91.3206	164.271	114.618	143.262	135.814	246.076	358.756	365.728	383.821	87.9931	99.2989	85.6886	141.61	120.378	94.4557	180.88	133.396
pgaptmp_002399	pgaptmp_002399	pgaptmp_002399	protein_coding	protein_coding	pgaptmp_002399	0.4892	1200	GO:1901642	GO:0005337,GO:0015293	GO:0005886	TRUE	-0.962681	0.000240788	0.0198048	Chromosome_I	2610483	2611682	1200	-	11.4594	1336.01	1422.27	1449.87	1675.19	1913.69	2088.89	1533.92	1497.82	1442.71	5989.43	6144.43	8101.38	5169.93	4082.35	5242.15	2907.38	3292.81	2721.39	3498.15	3873.92	3853.16	45.8761	48.9826	50.4301	75.2051	82.4583	85.2052	60.863	54.2395
pgaptmp_005036	pgaptmp_005036	napG	protein_coding	protein_coding	pgaptmp_005036	0.4981	771				TRUE	0.989861	0.000253575	0.0203308	Chromosome_II	1994860	1995630	771	-	7.58273	262.885	317.722	347.97	401.662	440.36	487.379	510.068	553.753	444.776	66.5941	72.5649	68.5459	83.9561	81.0254	96.1741	112.924	95.8684	93.9322	183.849	249.766	234.28	14.0498	17.0308	18.8377	28.0653	29.5323	30.9418	31.4997	31.2104
pgaptmp_003170	pgaptmp_003170	pgaptmp_003170	protein_coding	protein_coding	pgaptmp_003170	0.4847	522	GO:0046177	GO:0005524,GO:0046316		TRUE	-1.13339	0.000254907	0.0203308	Chromosome_I	3437372	3437893	522	+	11.0544	1151.76	1087.82	1092.1	666.874	857.508	966.512	1051.32	889.587	1039.45	2677.89	3688.11	3412.47	3752.98	3879.23	4973.39	6606.91	7287.33	13887.4	1760.81	1674.45	2125.97	90.9179	86.1251	87.3241	68.8236	84.9399	90.6294	95.8952	74.0552
pgaptmp_001902	pgaptmp_001902	pgaptmp_001902	protein_coding	protein_coding	pgaptmp_001902	0.4658	1419				TRUE	0.902102	0.000272396	0.0212065	Chromosome_I	2044847	2046265	1419	-	8.78998	2850.1	2921.99	2651.43	1336.31	1238.47	1205.67	2472.38	2544.88	2289.33	72.6481	65.3084	77.8088	79.5373	78.8055	80.3647	101.126	81.2219	109.808	591.78	765.863	678.748	82.763	85.1016	77.99	50.7328	45.1281	41.5889	82.9595	77.933
pgaptmp_004162	pgaptmp_004162	pgaptmp_004162	protein_coding	protein_coding	pgaptmp_004162	0.4521	1515		GO:0005515		TRUE	-1.27179	0.000273945	0.0212065	Chromosome_II	1002396	1003910	1515	+	5.31409	20.8149	21.1228	26.1386	39.0771	38.2328	26.3894	42.3201	32.8371	53.4857	40.3601	56.2378	33.3466	47.1332	45.5074	26.3491	33.7087	15.9781	35.7207	77.6746	80.2818	125.448	0.566135	0.57621	0.720129	1.38955	1.30487	0.852608	1.33005	0.941867
pgaptmp_000764	pgaptmp_000764	pgaptmp_000764	protein_coding	protein_coding	pgaptmp_000764	0.4086	186				TRUE	1.45143	0.000283784	0.0216498	Chromosome_I	810791	810976	186	-	8.04631	696.914	595.839	806.212	838.557	518.192	437.074	645.938	634.353	846.623	155.386	97.9626	116.713	73.6457	78.8055	90.9043	168.544	145.134	130.976	253.141	205.165	191.08	154.392	132.391	180.916	242.875	144.053	115.02	165.352	148.203
pgaptmp_003649	pgaptmp_003649	pgaptmp_003649	protein_coding	protein_coding	pgaptmp_003649	0.4778	1557				TRUE	-1.49202	0.00031097	0.0230991	Chromosome_II	405953	407509	1557	-	8.44297	169.603	168.102	214.827	326.71	279.919	200.394	135.127	150.752	178.755	512.573	426.319	420.538	413.889	508.351	407.093	557.879	536.597	541.103	941.036	867.171	517.577	4.48852	4.46197	5.75891	11.3042	9.29582	6.29985	4.13225	4.20739
pgaptmp_003730	pgaptmp_003730	pgaptmp_003730	protein_coding	protein_coding	pgaptmp_003730	0.4194	453				TRUE	1.38397	0.000311955	0.0230991	Chromosome_II	488112	488564	453	+	8.10311	272.136	321.243	353.688	773.215	505.22	899.713	774.383	613.457	693.907	153.368	70.7507	92.6295	89.8477	106.554	94.8567	328.66	254.318	260.629	270.464	319.853	245.911	24.754	29.3074	32.5884	91.953	57.6668	97.2162	81.3936	58.8469
pgaptmp_004423	pgaptmp_004423	cobA	protein_coding	protein_coding	pgaptmp_004423	0.4585	759	GO:0019354	GO:0004851		TRUE	0.942613	0.000315945	0.0230991	Chromosome_II	1293073	1293831	759	-	9.20059	1776.98	2569.94	3060.67	4336.92	3884.73	3683.79	4207.51	3992.69	3949.5	82.7381	54.4236	79.6614	54.4978	54.3869	71.1425	79.2155	58.5863	70.1184	2227.98	2224.32	1799.47	96.4713	139.934	168.312	307.825	264.645	237.567	263.946	228.592
pgaptmp_002338	pgaptmp_002338	pgaptmp_002338	protein_coding	protein_coding	pgaptmp_002338	0.4568	1215	GO:0009058	GO:0003824,GO:0030170		TRUE	-1.21796	0.000340054	0.0244928	Chromosome_I	2541439	2542653	1215	+	11.8729	20985.3	19843.1	18718.5	2210.74	2297.38	1397.81	2576.33	2960.56	3010.68	2393.35	3281.75	2589.92	2847.14	2371.93	2562.45	2770.86	3308.79	2847.07	3963.64	4697.12	5196.54	711.7	674.956	643.036	98.0225	97.769	56.3126	100.962	105.885
pgaptmp_004181	pgaptmp_004181	pgaptmp_004181	protein_coding	protein_coding	pgaptmp_004181	0.4566	1428	GO:0055085	GO:0022857		TRUE	0.772935	0.000344314	0.0244928	Chromosome_II	1020486	1021913	1428	+	7.9636	279.845	339.725	308.762	397.818	355.019	393.367	508.583	503.005	464.481	117.044	121.546	163.028	220.937	134.302	172.586	188.769	186.411	222.262	208.995	229.377	232.619	8.07509	9.83198	9.02478	15.0079	12.8549	13.4835	16.9577	15.3067
pgaptmp_004464	pgaptmp_004464	pgaptmp_004464	protein_coding	protein_coding	pgaptmp_004464	0.4027	375				TRUE	0.753263	0.00034984	0.0245541	Chromosome_II	1332406	1332780	375	-	7.50463	174.999	138.178	139.678	234.463	275.14	216.888	198.236	218.665	254.761	209.872	190.483	133.387	195.898	228.647	176.539	150.004	186.411	138.914	134.673	143.36	148.71	19.2293	15.2283	15.5467	33.6827	37.9373	28.3098	25.1701	25.3388
pgaptmp_005290	pgaptmp_005290	ompW	protein_coding	protein_coding	pgaptmp_005290	0.431	645			GO:0019867	TRUE	0.886095	0.000354808	0.0245751	Chromosome_II	2277464	2278108	645	-	7.04872	171.916	227.95	260.569	495.19	402.128	482.431	422.458	361.954	332.174	42.3781	36.2824	35.1992	47.1332	32.1882	30.3014	55.6194	57.2548	46.3046	277.17	230.651	239.265	10.9828	14.6057	16.8618	41.3596	32.2365	36.6107	31.1858	24.3855
pgaptmp_004271	pgaptmp_004271	pgaptmp_004271	protein_coding	protein_coding	pgaptmp_004271	0.4615	624				TRUE	1.06369	0.000365485	0.0248523	Chromosome_II	1120768	1121391	624	+	7.28244	172.687	197.146	215.643	347.85	288.112	442.847	437.307	319.415	332.174	48.4321	76.1931	40.757	85.429	57.7167	59.2854	150.004	122.499	149.498	178.26	170.758	164.495	11.4034	13.0571	14.4242	30.0312	23.8737	34.7378	33.3684	22.2438
pgaptmp_001876	pgaptmp_001876	pgaptmp_001876	protein_coding	protein_coding	pgaptmp_001876	0.4732	1344				TRUE	-0.917041	0.000368253	0.0248523	Chromosome_I	2010696	2012039	1344	+	8.416	242.07	235.871	252.401	172.964	261.485	206.992	185.614	149.26	158.346	720.427	881.663	1044.86	397.687	438.425	694.298	296.637	348.855	428.648	426.931	395.038	417.883	7.42163	7.253	7.83849	6.933	10.0599	7.53853	6.57575	4.82592
pgaptmp_004030	pgaptmp_004030	pgaptmp_004030	protein_coding	protein_coding	pgaptmp_004030	0.4554	1770			GO:0098561	TRUE	-1.02476	0.000383325	0.0255421	Chromosome_II	800173	801942	1770	-	10.4185	1093.94	1040.3	1110.07	1292.75	1233.01	913.733	1187.93	1282.14	1257.62	1676.96	1819.56	2274.98	790.955	1262	1331.95	1076.99	1043.9	1518.79	2373.27	2014.69	2694.22	25.467	24.2899	26.177	39.3464	36.0194	25.2685	31.9559	31.4774
pgaptmp_001326	pgaptmp_001326	pgaptmp_001326	protein_coding	protein_coding	pgaptmp_001326	0.3969	519		GO:0008080,GO:0016746		TRUE	0.755751	0.000408613	0.0268868	Chromosome_I	1397373	1397891	519	+	8.54447	504.954	535.111	610.173	607.938	653.372	586.339	668.212	703.759	729.095	248.214	253.977	224.164	212.1	275.264	222.65	217.421	238.34	160.082	402.902	359.994	333.974	40.0906	42.6107	49.0712	63.1038	65.0934	55.2986	61.3027	58.9242
pgaptmp_001532	pgaptmp_001532	pgaptmp_001532	protein_coding	protein_coding	pgaptmp_001532	0.4119	471				TRUE	1.07434	0.000421692	0.0274048	Chromosome_I	1590531	1591001	471	+	9.26115	1110.13	1357.14	1453.96	1332.47	1374.33	1845.61	1876.19	1737.38	1656.65	278.484	212.252	257.51	313.731	207.558	216.062	202.252	280.948	181.249	764.452	791.987	626.409	97.1204	119.082	128.846	152.405	150.874	191.801	189.666	160.292
pgaptmp_004163	pgaptmp_004163	tssJ	protein_coding	protein_coding	pgaptmp_004163	0.4351	501	GO:0033103	GO:0003674		TRUE	-1.40238	0.000436728	0.0280358	Chromosome_II	1003903	1004403	501	+	4.22347	10.022	7.04093	10.6188	16.6558	15.7028	9.89602	20.7888	19.4037	26.7429	10.09	36.2824	9.26295	11.7833	23.3087	17.1269	13.4835	21.3041	13.2299	39.1167	36.9551	72.278	0.82428	0.58081	0.884665	1.79099	1.62063	0.966843	1.97572	1.683
pgaptmp_004466	pgaptmp_004466	pgaptmp_004466	protein_coding	protein_coding	pgaptmp_004466	0.3333	357				TRUE	0.863767	0.000445224	0.0282368	Chromosome_II	1333822	1334178	357	-	9.11714	469.492	526.31	515.42	774.496	773.532	863.428	994.893	1041.83	997.227	433.871	493.441	531.694	544.978	374.049	382.062	458.438	430.076	404.835	415.755	512.912	403.76	54.1899	60.9277	60.2607	116.873	112.035	118.383	132.691	126.814
pgaptmp_001323	pgaptmp_001323	pgaptmp_001323	protein_coding	protein_coding	pgaptmp_001323	0.3865	414				TRUE	0.808666	0.000465641	0.0291802	Chromosome_I	1395742	1396155	414	+	7.2587	177.312	195.386	172.351	226.135	209.598	239.154	184.872	197.769	190.719	171.53	156.014	127.829	116.36	116.543	98.809	153.375	109.183	91.2862	138.585	131.892	110.494	17.648	19.5045	17.3762	29.426	26.1776	28.2755	21.262	20.7585
pgaptmp_001533	pgaptmp_001533	pgaptmp_001533	protein_coding	protein_coding	pgaptmp_001533	0.3983	723				TRUE	0.712159	0.000488948	0.0302802	Chromosome_I	1591112	1591834	723	-	8.32201	536.562	546.553	642.846	698.904	767.388	691.897	706.077	593.307	662.238	183.638	172.342	138.944	156.129	169.82	121.206	143.262	110.515	100.547	443.695	467.036	412.068	30.5802	31.2417	37.1116	52.0767	54.8808	46.842	46.4993	35.6598
pgaptmp_001858	pgaptmp_001858	pgaptmp_001858	protein_coding	protein_coding	pgaptmp_001858	0.4526	612				TRUE	1.07813	0.000500169	0.030615	Chromosome_I	1989084	1989695	612	-	6.3072	378.523	299.24	199.307	251.119	243.734	153.388	123.99	200.754	227.314	18.162	41.7248	14.8207	23.5666	32.1882	36.8887	21.9107	22.6356	26.4598	87.1744	94.9364	117.14	25.4859	20.2074	13.5929	22.1051	20.5925	12.268	9.64649	14.2545
pgaptmp_000619	pgaptmp_000619	opaR	protein_coding	protein_coding	pgaptmp_000619	0.4472	615				TRUE	1.46665	0.000527304	0.0316188	Chromosome_I	626466	627080	615	-	12.2255	6642.27	8920.86	10648.2	7421.45	6381.47	10804.8	8548.65	6396.52	6297.24	4913.84	4658.66	1672.89	2592.33	3034.57	1413.63	9703.05	6686.82	2405.19	3754.09	2954.5	2338.65	445.041	599.478	722.674	650.097	536.525	859.953	661.844	451.966
pgaptmp_001332	pgaptmp_001332	pgaptmp_001332	protein_coding	protein_coding	pgaptmp_001332	0.3814	687				TRUE	0.794601	0.000530681	0.0316188	Chromosome_I	1403731	1404417	687	+	8.60588	444.051	444.459	513.787	491.987	491.565	533.561	464.036	455.242	448.295	532.753	439.017	238.984	310.785	298.573	197.618	670.803	450.049	254.014	312.934	311.57	251.727	26.6339	26.7372	31.2153	38.5799	36.9972	38.0154	32.1608	28.7954
pgaptmp_001178	pgaptmp_001178	pgaptmp_001178	protein_coding	protein_coding	pgaptmp_001178	0.4553	2550	GO:0000160			TRUE	0.900108	0.000534589	0.0316188	Chromosome_I	1254285	1256834	2550	-	10.8241	4250.1	4487.72	3790.1	3075.56	3046.34	2158.98	3127.97	3485.96	3484.31	1319.77	1329.75	807.73	1079.65	1287.53	808.917	1162.95	994.635	780.564	1441.17	1478.21	1544.42	68.6779	72.7322	62.037	64.9753	61.7706	41.4421	58.4057	59.4045
pgaptmp_002168	pgaptmp_002168	pgaptmp_002168	protein_coding	protein_coding	pgaptmp_002168	0.4489	978				TRUE	-0.783354	0.000547753	0.0320375	Chromosome_I	2351124	2352101	978	-	9.41488	1329.84	1416.11	1609.16	1010.88	966.062	795.805	1167.89	1242.59	1401.89	399.565	384.594	450.18	172.331	207.558	212.11	296.637	350.186	289.735	1517.17	1629.21	1687.32	56.0298	59.841	68.6753	55.6833	51.0752	39.8291	56.8583	55.2109
pgaptmp_004799	pgaptmp_004799	pgaptmp_004799	protein_coding	protein_coding	pgaptmp_004799	0.4505	1365				TRUE	0.815854	0.000565003	0.0326832	Chromosome_II	1723976	1725340	1365	+	11.9941	2642.72	3475.58	3634.9	7276.67	6853.92	6989.07	4169.64	3400.13	3562.43	5404.21	5469.58	6317.34	2935.52	2869.19	3011.7	3421.43	3717.56	2825.9	4054.17	4211.61	3864.8	79.7769	105.229	111.148	287.187	259.627	250.622	145.445	108.243
pgaptmp_001861	pgaptmp_001861	pgaptmp_001861	protein_coding	protein_coding	pgaptmp_001861	0.4861	2448	GO:0009061	GO:0009055,GO:0009389,GO:0030151,GO:0043546,GO:0051539		TRUE	0.93069	0.000640172	0.036629	Chromosome_I	1991306	1993753	2448	-	8.89042	3646.46	2774.13	2234.03	2114.01	2900.23	2057.55	2006.12	3113.55	2756.63	48.4321	88.892	66.6933	69.2269	75.4757	77.7298	50.5631	43.9397	56.8885	1072.92	1280.05	1375.77	61.3789	46.8335	38.0907	46.5221	61.2584	41.1407	39.0192	55.2691
pgaptmp_001371	pgaptmp_001371	pgaptmp_001371	protein_coding	protein_coding	pgaptmp_001371	0.4331	411				TRUE	0.64467	0.000653622	0.0369964	Chromosome_I	1436971	1437381	411	+	7.34267	208.149	198.026	236.881	202.432	192.53	183.901	184.129	244.039	191.423	135.206	154.2	122.271	119.306	155.391	115.936	151.689	183.748	136.268	124.056	124.883	117.971	20.8685	19.9124	24.0563	26.534	24.2214	21.9016	21.3311	25.8021
pgaptmp_004146	pgaptmp_004146	tssI	protein_coding	protein_coding	pgaptmp_004146	0.4618	2079	GO:0033103	GO:0003674		TRUE	-0.640646	0.000665831	0.0370187	Chromosome_II	980923	983001	2079	+	6.95359	100.22	78.3304	89.8514	119.794	129.719	122.051	167.053	158.215	140.752	141.26	126.989	74.1036	116.36	142.072	104.079	102.812	94.5369	87.3173	193.348	193.696	210.188	1.98636	1.5571	1.80389	3.10416	3.2262	2.87355	3.82589	3.30698
pgaptmp_001307	pgaptmp_001307	pgaptmp_001307	protein_coding	protein_coding	pgaptmp_001307	0.3352	528				TRUE	0.728442	0.000672388	0.0370187	Chromosome_I	1384535	1385062	528	+	8.21246	363.105	391.652	338.168	352.975	432.168	430.477	348.212	435.838	370.881	270.412	281.189	246.395	310.785	223.097	214.745	269.67	211.709	185.218	242.524	233.2	258.373	28.3371	30.6555	26.7325	36.0143	42.3216	39.907	31.401	35.8698
pgaptmp_002157	pgaptmp_002157	sctW	protein_coding	protein_coding	pgaptmp_002157	0.4441	894	GO:0030254,GO:0050709		GO:0009986	TRUE	-0.876958	0.000675113	0.0370187	Chromosome_I	2340585	2341478	894	-	9.80118	1413.87	1250.65	1286.51	621.39	672.488	732.306	1082.5	1401.55	1313.92	748.679	1070.33	1231.97	469.859	386.258	451.887	709.568	809.556	702.507	1090.8	1201.04	1494.58	65.1675	57.8147	60.0643	37.4448	38.8948	40.0948	57.6533	68.1252
pgaptmp_005203	pgaptmp_005203	pgaptmp_005203	protein_coding	protein_coding	pgaptmp_005203	0.4599	1122	GO:0015774		GO:0016020	TRUE	0.91431	0.000693546	0.0376374	Chromosome_II	2174165	2175286	1122	+	11.1934	1700.66	1739.11	1681.04	3998.04	4115.49	3076.84	2821.34	2991.91	2968.46	4060.22	3374.27	2015.62	1847.03	2542.86	1363.56	2007.35	2007.91	1636.54	1854.13	1787.86	2338.65	62.4571	64.0584	62.5353	191.963	189.659	134.228	119.728	115.876
pgaptmp_001571	pgaptmp_001571	pgaptmp_001571	protein_coding	protein_coding	pgaptmp_001571	0.4458	1938		GO:0008484		TRUE	-0.727511	0.000701044	0.0376561	Chromosome_I	1632029	1633966	1938	-	10.5719	1607.37	1727.67	1663.88	1238.94	1310.84	1259.27	1543.57	1589.61	1418.08	1933.25	1873.99	2143.45	923.517	846.881	1044.74	1511.84	1451.34	1521.44	2302.86	1950.98	2137.6	34.176	36.8424	35.8352	34.4397	34.9736	31.8052	37.9232	35.6431
pgaptmp_002158	pgaptmp_002158	vscN	protein_coding	protein_coding	pgaptmp_002158	0.5193	1323				TRUE	-1.03303	0.000730419	0.0386229	Chromosome_I	2341666	2342988	1323	+	8.98902	573.567	506.947	501.534	204.354	277.188	295.231	370.486	444.047	389.179	696.211	917.946	891.096	552.343	442.865	440.03	642.151	748.306	900.956	543.722	435.816	651.333	17.8641	15.836	15.8227	8.32124	10.8332	10.9228	13.3335	14.585
pgaptmp_001372	pgaptmp_001372	pgaptmp_001372	protein_coding	protein_coding	pgaptmp_001372	0.41	522		GO:0008080,GO:0016746		TRUE	0.695137	0.000743309	0.0386229	Chromosome_I	1437519	1438040	522	+	7.73442	282.158	264.035	342.252	262.65	310.642	244.102	288.816	287.325	277.985	157.404	228.579	194.522	160.548	163.161	151.507	200.567	183.748	127.007	164.849	180.316	156.187	22.273	20.9042	27.3663	27.1063	30.7704	22.8893	26.3441	23.9188
pgaptmp_003885	pgaptmp_003885	pgaptmp_003885	protein_coding	protein_coding	pgaptmp_003885	0.4801	777				TRUE	0.933156	0.000745775	0.0386229	Chromosome_II	653672	654448	777	-	9.26396	1017.62	955.807	951.608	1418.95	1268.51	964.862	1406.96	1547.08	1514.49	298.665	297.516	270.478	235.666	315.222	266.126	332.031	291.6	559.624	547.634	642.255	731.088	53.9662	50.8383	51.1185	98.3806	84.4145	60.7823	86.2169	86.5223
pgaptmp_003320	pgaptmp_003320	nagB	protein_coding	protein_coding	pgaptmp_003320	0.4682	801	GO:0006044	GO:0004342		TRUE	-0.817911	0.000748393	0.0386229	Chromosome_II	55586	56386	801	+	11.1713	1884.14	2075.32	2439.06	3695.03	3326.26	3472.68	4501.52	4047.92	4065.62	1305.65	1338.82	1374.62	1117.94	1233.14	1551.96	1090.48	1029.25	981.658	6781.72	6279.19	5677.56	96.9254	107.076	127.096	248.513	214.717	212.21	267.583	219.602
pgaptmp_004873	pgaptmp_004873	pgaptmp_004873	protein_coding	protein_coding	pgaptmp_004873	0.5024	414				TRUE	-0.818159	0.00077227	0.0394682	Chromosome_II	1803311	1803724	414	+	6.43401	100.991	117.056	67.797	146.699	128.353	98.9602	148.491	117.169	104.156	68.6121	45.353	42.6096	51.552	66.5962	64.5552	28.6524	39.9452	33.0747	232.465	207.076	242.588	10.0517	11.6851	6.83519	19.0894	16.0306	11.7002	17.0779	12.2984
pgaptmp_004890	pgaptmp_004890	pgaptmp_004890	protein_coding	protein_coding	pgaptmp_004890	0.4154	2340				TRUE	-0.88879	0.000783221	0.039643	Chromosome_II	1824801	1827140	2340	-	11.0638	3153.07	2970.39	3187.27	3862.87	3795.29	2789.03	1554.71	1861.27	1824.85	1598.26	2289.42	1495.04	830.723	840.222	725.917	1250.59	1351.48	1041.19	6598.43	6002.66	6926.23	55.5235	52.4614	56.8518	88.9321	83.8636	58.3405	31.6348	34.5645
pgaptmp_002664	pgaptmp_002664	pgaptmp_002664	protein_coding	protein_coding	pgaptmp_002664	0.4768	1269	GO:0019346	GO:0016765,GO:0030170		TRUE	0.731294	0.000821716	0.0411954	Chromosome_I	2882852	2884120	1269	-	8.75623	650.659	608.161	632.227	481.097	516.826	464.288	624.407	717.192	755.134	355.169	333.798	350.14	352.026	303.013	355.713	389.336	396.789	362.499	264.876	340.879	275.819	21.1276	19.8061	20.7947	20.4237	21.0585	17.9085	23.4282	24.559
pgaptmp_001898	pgaptmp_001898	pgaptmp_001898	protein_coding	protein_coding	pgaptmp_001898	0.4604	1212				TRUE	-0.831338	0.000846188	0.042022	Chromosome_I	2039582	2040793	1212	-	10.3454	1334.47	1349.22	1467.85	951.944	869.797	733.13	978.559	1123.92	1090.12	1509.47	1665.36	1728.47	1405.16	1414.06	1401.77	1361.83	1450.01	1510.85	1322.14	1536.82	1749.63	45.3695	46.0067	50.5497	42.3129	37.1073	29.6082	38.443	40.2969
pgaptmp_004491	pgaptmp_004491	pgaptmp_004491	protein_coding	protein_coding	pgaptmp_004491	0.3667	180				TRUE	0.744089	0.00087459	0.0423708	Chromosome_II	1367296	1367475	180	+	7.20592	182.709	251.713	250.767	313.258	291.525	282.861	286.589	291.056	318.803	88.7922	68.9366	74.1036	69.2269	55.4968	71.1425	107.868	91.8739	58.2115	183.849	196.244	147.048	41.8259	57.793	58.1486	93.7548	83.7429	76.919	75.8087	70.2654
pgaptmp_001582	pgaptmp_001582	pgaptmp_001582	protein_coding	protein_coding	pgaptmp_001582	0.462	987				TRUE	0.734862	0.000877863	0.0423708	Chromosome_I	1648613	1649599	987	-	7.87663	524.227	575.596	606.905	447.145	399.397	366.153	522.69	561.216	488.409	98.8822	83.4496	111.155	120.779	110.994	115.936	131.464	119.836	101.87	210.671	263.783	254.219	21.8857	24.1014	25.6652	24.4059	20.9234	18.1584	25.215	24.7087
pgaptmp_001322	pgaptmp_001322	pgaptmp_001322	protein_coding	protein_coding	pgaptmp_001322	0.3893	768				TRUE	0.930428	0.00087925	0.0423708	Chromosome_I	1394841	1395608	768	+	8.58559	400.88	465.582	513.787	565.017	584.416	696.02	543.479	428.375	527.82	385.439	368.267	344.582	278.381	321.882	223.967	350.571	314.235	186.541	385.02	328.136	257.542	21.5086	25.054	27.923	39.6337	39.3464	44.3602	33.6941	24.2382
pgaptmp_000270	pgaptmp_000270	pgaptmp_000270	protein_coding	protein_coding	pgaptmp_000270	0.4901	1212		GO:0030170		TRUE	0.863532	0.000885409	0.0423708	Chromosome_I	285022	286233	1212	+	10.4077	2449.22	2360.47	2306.73	2022.4	2312.4	1477.81	2438.23	3619.54	3221.81	589.257	821.797	735.479	768.861	781.395	802.329	1031.49	1018.6	1059.71	1028.77	1099.1	1079.19	83.2691	80.4893	79.4392	89.8936	98.6518	59.6826	95.7866	129.774
pgaptmp_004017	pgaptmp_004017	pgaptmp_004017	protein_coding	protein_coding	pgaptmp_004017	0.475	579				TRUE	0.795003	0.000920056	0.0433296	Chromosome_II	785015	785593	579	-	11.8079	3706.6	4398.82	3705.96	4195.35	4143.48	4987.6	5444.44	6134.57	5390.8	3460.88	4029.16	4096.08	2785.28	2394.13	2590.11	3013.56	2934.64	3060.07	2617.47	2577.94	2582.9	263.788	313.978	267.155	390.349	370.025	421.644	447.721	460.408
pgaptmp_001327	pgaptmp_001327	pgaptmp_001327	protein_coding	protein_coding	pgaptmp_001327	0.3645	771				TRUE	0.609469	0.000921906	0.0433296	Chromosome_I	1398479	1399249	771	+	8.20235	279.845	304.52	343.886	363.225	407.589	357.906	343.015	300.012	375.104	270.412	272.118	281.594	259.233	265.275	192.348	348.885	334.208	230.2	254.817	242.757	242.588	14.9562	16.3231	18.6166	25.3797	27.3346	22.7221	21.1832	16.9091
pgaptmp_000749	pgaptmp_000749	pgaptmp_000749	protein_coding	protein_coding	pgaptmp_000749	0.4912	855	GO:0055085	GO:0015267		TRUE	0.736244	0.000931781	0.0434062	Chromosome_I	786000	786854	855	-	7.49997	309.911	270.196	232.797	179.37	173.413	169.057	190.812	200.008	169.606	193.728	321.1	142.65	125.198	177.59	177.856	185.398	185.079	268.567	86.0568	117.237	105.509	14.9358	13.0603	11.3645	11.3018	10.4872	9.67832	10.626	10.1653
pgaptmp_001334	pgaptmp_001334	pgaptmp_001334	protein_coding	protein_coding	pgaptmp_001334	0.3988	855				TRUE	0.663251	0.000963899	0.0445084	Chromosome_I	1405356	1406210	855	+	8.46907	375.439	395.172	469.678	519.534	501.123	473.36	467.748	455.242	443.368	433.871	299.33	216.753	248.922	296.353	213.428	466.866	340.866	182.572	348.139	287.358	310.712	18.0939	19.1013	22.9285	32.735	30.3056	27.0993	26.0483	23.1373
pgaptmp_003446	pgaptmp_003446	pgaptmp_003446	protein_coding	protein_coding	pgaptmp_003446	0.4428	813	GO:0006355	GO:0003700,GO:0043565		TRUE	-0.615238	0.000983815	0.0450331	Chromosome_II	195407	196219	813	-	8.41033	430.946	508.708	410.866	392.052	376.184	349.659	793.687	604.501	652.385	183.638	190.483	150.06	151.71	153.171	131.745	397.763	303.583	247.399	583.398	580.45	578.224	21.8419	25.8594	21.0936	25.9787	23.9251	21.0517	46.4827	32.3105
pgaptmp_003186	pgaptmp_003186	pgaptmp_003186	protein_coding	protein_coding	pgaptmp_003186	0.4679	1716				TRUE	0.806467	0.00100064	0.0454083	Chromosome_I	3456353	3458068	1716	-	10.4595	1894.93	1990.82	2057.6	1026.25	1220.72	1401.94	1263.66	1304.53	1203.43	1467.09	1692.58	1704.38	1969.29	1666.01	1617.83	1761.28	1882.75	1873.35	663.308	728.271	713.641	45.5023	47.9465	50.0477	32.2183	36.7826	39.9893	35.0628	33.035
pgaptmp_005055	pgaptmp_005055	fusA	protein_coding	protein_coding	pgaptmp_005055	0.482	2025	GO:0006414	GO:0003746		TRUE	0.781848	0.00103099	0.0463859	Chromosome_II	2019656	2021680	2025	+	7.69868	285.241	246.433	228.713	327.992	335.903	226.784	357.122	411.21	434.22	145.296	137.873	170.438	110.469	138.742	152.825	134.835	171.764	175.958	169.319	179.678	164.495	5.80425	5.02939	4.71418	8.72573	8.57694	5.48176	8.397	8.82422
pgaptmp_002155	pgaptmp_002155	sycN	protein_coding	protein_coding	pgaptmp_002155	0.4747	375	GO:0009306			TRUE	-0.727858	0.00110433	0.0492643	Chromosome_I	2339959	2340333	375	-	8.45861	653.742	583.517	541.559	281.227	302.449	277.089	383.85	547.036	482.779	401.583	460.787	400.16	209.154	188.689	229.237	156.746	239.671	201.094	407.931	485.514	561.608	71.8346	64.3079	60.2775	40.4008	41.7028	36.1676	48.7375	63.3902
pgaptmp_004350	pgaptmp_004350	pgaptmp_004350	protein_coding	protein_coding	pgaptmp_004350	0.453	2640				TRUE	0.634846	0.00113517	0.0502146	Chromosome_II	1214588	1217227	2640	-	8.79253	442.51	496.386	522.772	720.685	722.328	726.533	772.898	697.788	727.687	312.791	299.33	246.395	343.189	361.839	346.49	267.984	260.975	300.319	488.959	484.877	432.006	6.9068	7.77065	8.26512	14.7064	14.1473	13.4705	13.9396	11.4857
pgaptmp_002112	pgaptmp_002112	pgaptmp_002112	protein_coding	protein_coding	pgaptmp_002112	0.3987	627				TRUE	0.796375	0.00117548	0.0515643	Chromosome_I	2295526	2296152	627	+	8.62426	653.742	700.573	767.821	588.079	534.577	633.345	455.126	337.327	375.104	657.869	502.512	359.403	207.681	281.924	196.301	330.345	219.698	206.386	402.343	300.101	313.205	42.9633	46.1772	51.1132	50.528	44.0846	49.4431	34.5619	23.3787
pgaptmp_004381	pgaptmp_004381	pgaptmp_004381	protein_coding	protein_coding	pgaptmp_004381	0.4587	678				TRUE	0.720751	0.00120049	0.0522263	Chromosome_II	1245370	1246047	678	-	11.9551	3722.02	4693.66	4520.34	6228	7228.74	6544.57	7963.6	8998.86	8147.42	2395.37	3232.76	3071.6	3540.88	2380.81	2292.37	2170.84	2034.54	1992.42	4113.4	4189.95	3951.2	226.207	286.104	278.28	494.861	551.286	472.481	559.258	576.76
pgaptmp_003169	pgaptmp_003169	pgaptmp_003169	protein_coding	protein_coding	pgaptmp_003169	0.4829	1377	GO:0055085	GO:0022857		TRUE	-0.953307	0.00122741	0.0529599	Chromosome_I	3435843	3437219	1377	-	12.2608	2119.27	1791.92	1860.74	1794.99	1969.67	1455.54	2003.89	2178.44	2363.22	4603.07	6035.58	6120.96	13039.7	11254.8	16237.6	26587.7	27251.9	77593.3	2698.49	3264.79	4251.94	63.4176	53.7806	56.4018	70.2249	73.9613	51.7396	69.2904	68.7464
pgaptmp_002154	pgaptmp_002154	vscX	protein_coding	protein_coding	pgaptmp_002154	0.4683	378				TRUE	-0.906463	0.00125765	0.0538231	Chromosome_I	2339585	2339962	378	-	8.2555	507.267	423.336	417.401	186.417	240.321	181.427	210.858	417.927	348.361	391.493	533.352	440.917	181.168	215.328	275.348	224.163	256.981	201.094	332.492	336.419	500.13	55.2972	46.2845	46.0895	26.568	32.8733	23.4933	26.5602	48.0447
pgaptmp_004185	pgaptmp_004185	pgaptmp_004185	protein_coding	protein_coding	pgaptmp_004185	0.4603	1827	GO:0019290			TRUE	0.594746	0.00133008	0.0558091	Chromosome_II	1025547	1027373	1827	-	8.2001	257.488	328.284	304.678	475.332	509.316	507.996	537.539	496.288	503.188	189.692	248.535	220.458	212.1	170.93	180.491	175.285	183.748	189.187	332.492	342.791	317.359	5.80734	7.42595	6.96055	14.0159	14.4143	13.6099	14.0089	11.8041
pgaptmp_003439	pgaptmp_003439	pgaptmp_003439	protein_coding	protein_coding	pgaptmp_003439	0.4134	1161				TRUE	-0.816044	0.00133748	0.0558091	Chromosome_II	188533	189693	1161	+	5.79764	51.6518	38.7251	46.5594	47.405	42.3292	59.3761	63.8513	78.3613	54.1895	36.3241	50.7954	37.0518	29.4583	44.3975	42.1585	57.3048	46.6027	120.392	82.7039	96.8479	102.186	1.83321	1.37849	1.67385	2.19966	1.88518	2.5033	2.61861	2.93296
pgaptmp_003877	pgaptmp_003877	pgaptmp_003877	protein_coding	protein_coding	pgaptmp_003877	0.4429	858				TRUE	0.599665	0.00133805	0.0558091	Chromosome_II	644351	645208	858	+	9.16904	693.83	687.371	637.945	905.821	922.367	928.577	1150.07	1141.84	1157.68	369.295	460.787	387.192	410.943	300.793	262.173	347.2	342.197	424.679	601.28	614.22	618.101	33.3215	33.109	31.0339	56.8747	55.5854	52.9741	63.8217	57.8301
pgaptmp_001651	pgaptmp_001651	pgaptmp_001651	protein_coding	protein_coding	pgaptmp_001651	0.4386	627				TRUE	0.599836	0.00134646	0.0558091	Chromosome_I	1726908	1727534	627	-	5.97353	143.392	161.061	208.292	128.762	126.988	117.928	110.626	105.974	106.971	24.216	38.0966	18.5259	19.1479	23.3087	27.6665	38.765	26.6301	27.7828	83.8215	83.4676	74.7703	9.42355	10.6161	13.8658	11.0633	10.4722	9.20621	8.40084	7.34464
pgaptmp_001586	pgaptmp_001586	pgaptmp_001586	protein_coding	protein_coding	pgaptmp_001586	0.4353	1167				TRUE	-0.632488	0.0014057	0.0578094	Chromosome_I	1654167	1655333	1167	+	7.46382	184.251	220.029	267.921	276.743	234.176	258.946	305.15	279.115	284.319	90.8102	87.0778	74.1036	100.158	103.224	73.7774	112.924	89.2109	99.2242	400.667	423.71	395.452	6.50573	7.79204	9.58244	12.7753	10.3757	10.861	12.4502	10.3932
pgaptmp_001325	pgaptmp_001325	pgaptmp_001325	protein_coding	protein_coding	pgaptmp_001325	0.385	387				TRUE	0.676743	0.00145947	0.0595554	Chromosome_I	1396841	1397227	387	+	8.86597	646.033	690.892	808.663	798.839	838.392	889.817	965.937	786.598	806.508	240.142	275.746	196.375	291.637	289.693	277.983	321.918	250.323	220.939	595.692	512.912	483.515	68.7863	73.7803	87.2162	111.202	112.016	112.544	118.842	88.3241
pgaptmp_002013	pgaptmp_002013	pgaptmp_002013	protein_coding	protein_coding	pgaptmp_002013	0.4466	909	GO:0030001	GO:0046872		TRUE	-0.633671	0.00150662	0.0610064	Chromosome_I	2179111	2180019	909	-	8.72974	688.434	642.485	693.489	491.347	478.593	422.23	680.091	677.638	622.123	308.755	361.01	329.761	190.006	218.657	185.761	215.736	209.046	334.716	658.837	774.146	760.996	31.2073	29.2106	31.8432	29.1198	27.2237	22.7362	35.6234	32.3945
pgaptmp_002693	pgaptmp_002693	iscU	protein_coding	protein_coding	pgaptmp_002693	0.4583	384	GO:0016226	GO:0005198,GO:0005506,GO:0051536		TRUE	-0.839673	0.00154428	0.0619886	Chromosome_I	2916355	2916738	384	-	12.2081	5825.09	3986.05	5217.1	2125.54	2296.7	1662.53	2682.5	3476.26	3283.74	7188.13	6699.55	6374.77	10076.2	14727.7	12576.4	5096.76	6288.7	5620.06	3165.66	3465.5	4366.59	625.072	428.996	567.073	298.196	309.255	211.92	332.614	393.385
pgaptmp_004743	pgaptmp_004743	pgaptmp_004743	protein_coding	protein_coding	pgaptmp_004743	0.4262	1518		GO:0005524,GO:0016887		TRUE	0.670756	0.00155442	0.0619886	Chromosome_II	1660506	1662023	1518	-	9.64886	1576.54	1606.21	1441.71	1500.95	1561.4	1180.1	2099.67	2155.31	2205.58	403.601	384.594	301.972	319.622	334.091	276.665	534.283	459.37	392.928	870.067	915.595	894.752	42.7948	43.7294	39.6411	53.2669	53.1847	38.0522	65.8585	61.6986
pgaptmp_004399	pgaptmp_004399	uhpB	protein_coding	protein_coding	pgaptmp_004399	0.4733	1500	GO:0000160	GO:0000155		TRUE	0.648595	0.00161357	0.0630591	Chromosome_II	1264565	1266064	1500	+	7.27945	127.973	159.301	143.762	238.947	209.598	210.29	212.343	213.441	222.388	119.062	145.13	161.175	145.818	123.203	150.19	126.408	111.846	103.193	146.967	149.095	121.294	3.51549	4.38904	4.00032	8.58172	7.22503	6.86216	6.7403	6.18336
pgaptmp_001399	pgaptmp_001399	pgaptmp_001399	protein_coding	protein_coding	pgaptmp_001399	0.3869	411				TRUE	0.863904	0.00161362	0.0630591	Chromosome_I	1456137	1456547	411	+	6.9884	123.348	176.023	175.619	182.573	174.779	249.875	230.904	155.976	189.311	96.8642	79.8213	72.251	123.725	82.1353	81.6821	119.666	97.1999	87.3173	117.909	117.874	93.0475	12.3665	17.6999	17.8349	23.931	21.9882	29.7586	26.7499	16.4913
pgaptmp_004070	pgaptmp_004070	pgaptmp_004070	protein_coding	protein_coding	pgaptmp_004070	0.4218	147				TRUE	0.682224	0.00161721	0.0630591	Chromosome_II	859568	859714	147	-	6.85293	133.37	134.658	193.589	187.058	192.53	154.213	210.115	202.247	227.314	92.8282	74.379	85.2192	57.4436	48.8372	32.9363	117.98	129.156	85.9943	106.733	125.52	95.5399	37.385	37.8579	54.9673	68.5524	67.7211	51.3495	68.0571	59.7863
pgaptmp_001602	pgaptmp_001602	pgaptmp_001602	protein_coding	protein_coding	pgaptmp_001602	0.3536	2175				TRUE	0.76408	0.00163066	0.0631162	Chromosome_I	1670038	1672212	2175	-	11.2906	4775.1	5870.38	5680.24	4329.87	4127.1	4430.12	5719.15	5080.05	5486.51	1707.23	1603.68	917.033	1061.97	1126.59	621.838	2504.56	1955.98	779.241	2900.22	2611.71	2160.86	90.4651	111.545	109.006	107.246	98.1137	99.6986	125.2	101.495
pgaptmp_000591	pgaptmp_000591	oadA	protein_coding	protein_coding	pgaptmp_000591	0.4822	1794	GO:0006814	GO:0008948,GO:0015081		TRUE	0.597408	0.00167324	0.0642916	Chromosome_I	594118	595911	1794	+	9.62717	1017.62	964.608	1016.14	719.403	678.633	686.949	742.457	855.257	807.916	647.779	751.046	737.331	1179.8	1073.31	1136.96	876.426	1011.94	908.893	443.695	495.708	447.791	23.3733	22.2213	23.6413	21.603	19.5594	18.7428	19.7052	20.7163
pgaptmp_000814	pgaptmp_000814	pgaptmp_000814	protein_coding	protein_coding	pgaptmp_000814	0.4424	486		GO:0008080,GO:0016746		TRUE	0.731923	0.00170946	0.0652071	Chromosome_I	859924	860409	486	+	9.85739	1269.71	1593.01	1556.06	1495.18	1342.93	1572.64	1081.76	878.393	997.227	722.445	687.552	628.028	543.505	694.82	619.203	913.506	704.367	648.265	957.801	957.647	766.811	107.653	135.464	133.639	165.738	142.876	158.39	105.981	78.5398
pgaptmp_003648	pgaptmp_003648	pgaptmp_003648	protein_coding	protein_coding	pgaptmp_003648	0.4503	1359	GO:0009966	GO:0009975		TRUE	-0.705639	0.00172366	0.0652759	Chromosome_II	404216	405574	1359	+	8.58587	243.612	299.24	347.97	402.943	339.317	403.263	572.435	472.407	529.931	337.007	324.728	344.582	256.287	319.662	271.395	367.425	319.561	357.207	554.34	670.29	682.072	7.38647	9.1	10.6872	15.9731	12.9101	14.5245	20.0558	15.1055
pgaptmp_001216	pgaptmp_001216	nrfA	protein_coding	protein_coding	pgaptmp_001216	0.4958	1428	GO:0008152	GO:0005509,GO:0020037,GO:0042279	GO:0042597	TRUE	0.737861	0.00179371	0.0674435	Chromosome_I	1298386	1299813	1428	-	7.82657	578.963	673.289	579.133	454.832	485.421	340.588	533.084	464.944	527.116	88.7922	68.9366	137.092	60.3895	109.884	126.476	74.1592	125.162	111.131	219.054	279.712	267.512	16.7063	19.4857	16.9274	17.1588	17.5766	11.6744	17.7746	14.1485
pgaptmp_001847	pgaptmp_001847	pgaptmp_001847	protein_coding	protein_coding	pgaptmp_001847	0.4204	402				TRUE	0.783716	0.00182862	0.0682686	Chromosome_I	1977180	1977581	402	-	6.97112	213.546	245.553	294.876	219.088	228.714	286.985	326.681	264.189	266.725	56.5041	76.1931	57.4303	48.6062	59.9366	35.5713	72.4737	75.8958	47.6276	155.908	150.369	117.14	21.8888	25.2441	30.6164	29.3601	29.4179	34.9434	38.6929	28.5579
pgaptmp_001636	pgaptmp_001636	pgaptmp_001636	protein_coding	protein_coding	pgaptmp_001636	0.435	1092				TRUE	1.00893	0.00184944	0.0685597	Chromosome_I	1711538	1712629	1092	+	10.1347	3759.02	3499.34	3473.98	2585.5	2718.63	1629.55	2659.48	3237.44	3409.01	647.779	614.987	266.773	462.495	487.262	317.506	482.035	456.707	301.642	890.185	1261.57	1305.99	141.844	132.436	132.784	127.551	128.727	73.0427	115.96	128.83
pgaptmp_000166	pgaptmp_000166	cadB	protein_coding	protein_coding	pgaptmp_000166	0.4744	1347		GO:0043872		TRUE	-0.91869	0.0019637	0.0722863	Chromosome_I	173853	175199	1347	+	12.2264	43792.3	39169.6	35770.7	19275.9	20403.4	14857.2	18097.4	25387.6	22119.2	298.665	487.999	329.761	506.682	367.389	403.141	610.128	721.676	812.315	29257.6	35731.8	38976.9	1339.64	1201.78	1108.41	770.924	783.21	539.887	639.707	819.013
pgaptmp_001439	pgaptmp_001439	pgaptmp_001439	protein_coding	protein_coding	pgaptmp_001439	0.3933	450				TRUE	0.540939	0.00206781	0.0741312	Chromosome_I	1490151	1490600	450	+	7.14369	161.123	204.187	183.787	175.527	185.702	180.602	127.703	129.11	125.269	135.206	67.1225	100.04	135.508	140.962	129.11	166.858	153.123	157.436	126.85	126.794	116.309	14.7538	18.7524	17.0468	21.0133	21.3378	19.6446	13.512	12.4676
pgaptmp_004424	pgaptmp_004424	pgaptmp_004424	protein_coding	protein_coding	pgaptmp_004424	0.4641	849	GO:0015724	GO:0015499	GO:0005886	TRUE	0.948752	0.00206809	0.0741312	Chromosome_II	1294128	1294976	849	-	10.7855	4433.58	6311.32	7308.19	8491.91	9365.68	12266.1	11157.6	11027.3	9630.25	274.448	366.453	298.267	251.868	156.501	187.078	291.58	227.688	293.704	5143.29	6121.17	4560.99	215.181	307.223	359.288	538.842	570.395	707.184	625.745	564.415
pgaptmp_001962	pgaptmp_001962	pgaptmp_001962	protein_coding	protein_coding	pgaptmp_001962	0.4637	1296				TRUE	-0.744664	0.00207567	0.0741312	Chromosome_I	2122113	2123408	1296	-	7.11621	131.828	134.658	167.45	121.716	111.285	131.947	126.218	111.945	127.38	92.8282	110.661	116.713	181.168	142.072	140.968	170.229	103.857	124.361	254.259	201.342	176.956	4.19141	4.29406	5.39289	5.05948	4.43992	4.98342	4.63712	3.7535
pgaptmp_004314	pgaptmp_004314	pgaptmp_004314	protein_coding	protein_coding	pgaptmp_004314	0.4604	480			GO:0005886	TRUE	0.936866	0.0020797	0.0741312	Chromosome_II	1170376	1170855	480	+	11.5053	2291.18	3112.09	3110.49	5105.65	4439.11	6982.47	6932.32	6051.73	5187.41	1479.2	1442.23	1187.51	1481.75	1265.33	1035.52	2925.92	2741.57	7152.08	2952.75	3120.16	2695.89	196.687	267.95	270.476	573.026	478.188	712.034	687.655	547.868
pgaptmp_003986	pgaptmp_003986	pgaptmp_003986	protein_coding	protein_coding	pgaptmp_003986	0.4735	378				TRUE	0.538414	0.00209766	0.0741312	Chromosome_II	754113	754490	378	+	8.11013	275.99	330.044	340.618	411.911	406.224	403.263	492.992	527.633	536.265	195.746	168.713	174.144	212.1	208.668	202.888	173.6	159.781	183.895	279.405	270.155	294.927	30.0857	36.0846	37.6112	58.7051	55.5671	52.2191	62.0984	60.6565
pgaptmp_001348	pgaptmp_001348	pgaptmp_001348	protein_coding	protein_coding	pgaptmp_001348	0.3391	696				TRUE	0.65027	0.00211347	0.0741312	Chromosome_I	1419658	1420353	696	+	9.79175	844.16	857.234	887.895	862.259	1028.87	1042.38	998.605	916.454	1095.05	1073.58	1057.63	974.463	1285.85	884.619	786.52	866.314	896.103	689.277	581.163	684.944	617.271	49.9774	50.9016	53.2468	66.741	76.4357	73.3078	68.3152	57.2188
pgaptmp_002507	pgaptmp_002507	pgaptmp_002507	protein_coding	protein_coding	pgaptmp_002507	0.4709	2697	GO:0006812	GO:0042625	GO:0016020	TRUE	-0.661937	0.00212044	0.0741312	Chromosome_I	2725482	2728178	2697	+	9.65446	1352.97	1129.19	1130.49	762.965	820.641	632.521	844.916	990.337	939.519	595.311	722.02	583.566	595.057	664.852	611.299	519.114	625.808	603.283	1066.77	1163.45	1320.11	20.6712	17.3033	17.4956	15.2401	15.7332	11.4796	14.9165	15.9566
pgaptmp_002161	pgaptmp_002161	sctQ	protein_coding	protein_coding	pgaptmp_002161	0.4648	966	GO:0030254		GO:0030257	TRUE	-0.870062	0.00213845	0.0741312	Chromosome_I	2344928	2345893	966	+	9.27204	1078.52	848.433	880.544	559.251	546.184	418.932	622.922	907.498	836.066	617.509	729.277	683.606	275.435	377.378	355.713	433.157	452.712	460.4	779.54	837.225	1213.77	46.0055	36.2979	38.0465	31.1885	29.2352	21.2275	30.7036	40.8231
pgaptmp_002056	pgaptmp_002056	pgaptmp_002056	protein_coding	protein_coding	pgaptmp_002056	0.4345	168				TRUE	1.15081	0.0021417	0.0741312	Chromosome_I	2221754	2221921	168	+	6.33238	115.638	175.143	165	255.603	224.618	126.999	88.3524	82.8391	102.749	50.4501	29.0259	46.3148	54.4978	37.7378	46.1109	60.6757	41.2767	42.3356	89.9684	109.591	63.9702	28.3629	43.085	40.9935	81.9635	69.132	37.0019	25.0404	21.4271
pgaptmp_002017	pgaptmp_002017	torE	protein_coding	protein_coding	pgaptmp_002017	0.4611	180	GO:0009061			TRUE	-0.801931	0.0021664	0.0741312	Chromosome_I	2185833	2186012	180	-	6.93182	376.21	419.816	477.029	160.793	170	112.155	387.563	361.208	363.14	42.3781	47.1672	57.4303	30.9312	26.6385	36.8887	32.0233	39.9452	52.9196	219.612	264.42	310.712	86.1225	96.3891	110.615	48.1236	48.8337	30.4985	102.518	87.2012
pgaptmp_002503	pgaptmp_002503	pgaptmp_002503	protein_coding	protein_coding	pgaptmp_002503	0.4479	960				TRUE	-0.827115	0.00216873	0.0741312	Chromosome_I	2719935	2720894	960	-	12.9792	9558.67	9837.07	9890.19	13964	11343.5	11627.8	10577.8	10226.5	10129.9	5704.9	5279.09	5318.79	3900.28	5033.56	3914.16	3967.52	4187.59	2720.07	23971.8	19631.5	22737.7	410.284	423.483	430.006	783.614	610.972	592.871	524.634	462.907
pgaptmp_001338	pgaptmp_001338	pgaptmp_001338	protein_coding	protein_coding	pgaptmp_001338	0.393	939				TRUE	0.522679	0.00224551	0.0762604	Chromosome_I	1410164	1411102	939	+	8.0473	279.845	299.24	270.371	365.787	381.646	347.185	376.426	339.566	369.474	183.638	166.899	151.912	268.07	284.144	243.729	269.67	211.709	162.728	253.141	263.783	246.742	12.2803	13.1703	12.0181	20.9859	21.0155	18.0979	19.0874	15.7143
pgaptmp_001179	pgaptmp_001179	pgaptmp_001179	protein_coding	protein_coding	pgaptmp_001179	0.4317	1200	GO:0009372	GO:0061579		TRUE	0.884658	0.0023084	0.0778939	Chromosome_I	1256827	1258026	1200	-	10.8653	6058.68	6478.54	6315.74	4047.36	3421.84	2279.38	5488.24	5344.99	5323.24	922.228	722.02	426.096	583.274	947.886	525.664	1248.91	1095.83	624.451	1762.49	1819.08	1729.69	208.044	223.12	219.677	181.7	147.442	92.9756	217.763	193.554
pgaptmp_004611	pgaptmp_004611	pgaptmp_004611	protein_coding	protein_coding	pgaptmp_004611	0.4314	1305				TRUE	0.566234	0.00239216	0.080206	Chromosome_II	1511227	1512531	1305	-	10.4108	1476.32	1312.25	1276.71	1346.56	1418.03	1213.91	1623.01	2120.23	1869.89	1208.78	1211.83	1065.24	1720.36	1703.75	1401.77	1643.3	1713.65	1309.76	898.008	869.72	939.614	46.6152	41.5575	40.834	55.5878	56.1848	45.5312	59.2167	70.6009
pgaptmp_004492	pgaptmp_004492	pgaptmp_004492	protein_coding	protein_coding	pgaptmp_004492	0.4206	378				TRUE	0.908015	0.00243107	0.0804424	Chromosome_II	1367616	1367993	378	-	7.48688	144.163	184.825	240.148	231.9	238.955	378.523	293.271	226.875	223.796	96.8642	145.13	127.829	237.139	94.3446	142.285	166.858	238.34	123.038	160.379	145.272	144.556	15.7152	20.2074	26.5173	33.0502	32.6865	49.0155	36.9411	26.0814
pgaptmp_003160	pgaptmp_003160	pgaptmp_003160	protein_coding	protein_coding	pgaptmp_003160	0.485	600				TRUE	-0.744874	0.00248076	0.0804424	Chromosome_I	3423597	3424196	600	-	10.8646	4104.39	5210.29	4627.35	2923.74	2789.63	2071.57	5595.9	4521.82	4765.16	678.049	662.154	624.323	699.634	904.598	835.266	547.767	581.868	592.699	3925.08	4749.37	4497.02	281.875	358.883	321.901	262.513	240.403	168.998	444.07	327.491
pgaptmp_003759	pgaptmp_003759	lafA	protein_coding	protein_coding	pgaptmp_003759	0.4636	852				TRUE	-0.770666	0.00248445	0.0804424	Chromosome_II	513366	514217	852	-	6.80376	151.872	148.74	152.747	133.247	86.7066	91.5382	132.157	108.959	107.675	125.116	94.3343	70.3985	44.1874	74.3657	88.2694	133.149	93.2054	79.3793	196.701	175.855	180.28	7.34507	7.21488	7.48299	8.42521	5.26207	5.25891	7.38558	5.55729
pgaptmp_004643	pgaptmp_004643	pgaptmp_004643	protein_coding	protein_coding	pgaptmp_004643	0.3338	2037				TRUE	0.841489	0.00250071	0.0804424	Chromosome_II	1552797	1554833	2037	-	11.1995	4896.9	7077.02	6888.33	7411.2	7770.83	8598.82	8229.4	7182.37	8046.79	445.979	511.582	372.371	606.84	507.241	376.792	1289.36	1014.61	990.919	5469.08	4300.81	3660.42	99.0578	143.582	141.145	196.003	197.251	206.624	192.358	153.22
pgaptmp_005205	pgaptmp_005205	pgaptmp_005205	protein_coding	protein_coding	pgaptmp_005205	0.4375	2151	GO:0045226			TRUE	0.845771	0.00251229	0.0804424	Chromosome_II	2175829	2177979	2151	+	12.4063	5417.27	5608.1	4990.84	9167.75	9075.52	5923.59	8057.15	9244.39	8577.42	8481.67	7376.22	4453.63	3068.08	4430.87	2150.08	5580.48	4400.63	3062.72	4713.56	4078.44	4744.59	103.776	107.75	96.8443	229.608	218.16	134.796	178.35	186.756
pgaptmp_003660	pgaptmp_003660	pgaptmp_003660	protein_coding	protein_coding	pgaptmp_003660	0.3932	234				TRUE	0.583688	0.00252888	0.0804424	Chromosome_II	416914	417147	234	+	6.87835	132.599	141.699	120.074	162.715	189.116	186.375	200.463	209.71	208.313	46.4141	78.0072	55.5777	148.764	59.9366	80.3647	85.9572	85.2164	125.684	124.056	125.52	106.34	23.3497	25.026	21.4178	37.4606	41.7885	38.9857	40.7899	38.944
pgaptmp_005059	pgaptmp_005059	pgaptmp_005059	protein_coding	protein_coding	pgaptmp_005059	0.4742	291				TRUE	0.625929	0.00253788	0.0804424	Chromosome_II	2022748	2023038	291	-	9.70434	670.703	847.553	791.509	1280.58	1354.54	1149.59	1529.46	1519.46	1454.67	615.491	876.221	842.929	502.264	443.975	462.426	768.559	664.421	542.426	713.042	895.843	860.69	94.9719	120.369	113.528	237.07	240.681	193.367	250.253	226.9
pgaptmp_001363	pgaptmp_001363	pgaptmp_001363	protein_coding	protein_coding	pgaptmp_001363	0.4235	510				TRUE	0.646967	0.00255525	0.0804424	Chromosome_I	1430954	1431463	510	-	8.38702	501.871	567.675	588.118	538.752	627.428	439.548	556.843	557.484	564.415	191.71	172.342	172.291	215.045	220.877	208.158	215.736	202.389	228.877	310.14	358.082	358.067	40.549	46.0014	48.1322	56.9092	63.6118	42.1861	51.9871	47.5007
pgaptmp_001336	pgaptmp_001336	pgaptmp_001336	protein_coding	protein_coding	pgaptmp_001336	0.3776	948				TRUE	0.633676	0.0025626	0.0804424	Chromosome_I	1407400	1408347	948	+	8.29938	281.387	348.526	292.425	490.066	428.754	501.399	327.424	294.788	342.731	409.655	301.144	227.869	240.085	280.814	214.745	370.796	275.622	230.2	345.345	287.995	286.62	12.2308	15.1939	12.875	27.849	23.3853	25.8885	16.445	13.5126
pgaptmp_004891	pgaptmp_004891	pgaptmp_004891	protein_coding	protein_coding	pgaptmp_004891	0.4382	744				TRUE	-0.632868	0.00256595	0.0804424	Chromosome_II	1827660	1828403	744	+	8.9503	602.091	622.243	704.925	1176.16	1069.15	1077.84	610.3	586.59	590.454	284.538	246.721	238.984	175.277	173.15	183.126	197.196	246.329	201.094	1891.57	1520.89	1813.6	33.3463	34.5644	39.5468	85.1641	74.3039	70.9112	39.0574	34.2609
pgaptmp_004489	pgaptmp_004489	pgaptmp_004489	protein_coding	protein_coding	pgaptmp_004489	0.4304	1545	GO:0000160			TRUE	0.67732	0.00256731	0.0804424	Chromosome_II	1365369	1366913	1545	+	8.94583	1008.37	1130.95	1149.28	1180	985.179	840.337	1424.03	1367.22	1439.19	223.998	174.156	207.49	206.208	179.81	191.031	242.703	182.416	148.175	666.661	642.255	581.547	26.8936	30.2522	31.0484	41.1451	32.9709	26.6231	43.8858	38.4545
pgaptmp_001802	pgaptmp_001802	tssC	protein_coding	protein_coding	pgaptmp_001802	0.4895	1479	GO:0033103	GO:0003674	GO:0033104	TRUE	0.767462	0.00259886	0.0809491	Chromosome_I	1924964	1926442	1479	+	6.60819	236.673	252.594	256.485	115.31	140.642	151.739	212.343	180.604	193.534	42.3781	39.9107	81.514	53.0249	52.167	44.7934	62.3611	49.2657	68.7954	67.616	96.2108	69.7856	6.59385	7.05823	7.23827	4.20012	4.9169	5.02183	6.836	5.30636
pgaptmp_001406	pgaptmp_001406	pgaptmp_001406	protein_coding	protein_coding	pgaptmp_001406	0.3697	468				TRUE	0.563555	0.00264354	0.081688	Chromosome_I	1460120	1460587	468	+	7.3086	209.691	200.667	165	251.759	208.915	212.765	219.025	191.052	231.537	153.368	163.271	142.65	106.05	98.7843	110.666	155.06	103.857	79.3793	149.761	153.555	151.202	18.4626	17.7203	14.7156	28.9804	23.0817	22.2529	22.2833	17.7396
pgaptmp_001132	pgaptmp_001132	pgaptmp_001132	protein_coding	protein_coding	pgaptmp_001132	0.4723	1137	GO:0055085	GO:0022857,GO:0042802	GO:0016020	TRUE	-0.694414	0.00265362	0.081688	Chromosome_I	1199795	1200931	1137	+	7.7665	259.03	190.985	178.069	130.044	153.614	135.246	162.598	182.097	187.904	238.124	277.561	255.658	240.085	220.877	259.538	330.345	338.202	271.213	206.201	203.89	288.281	9.38746	6.94195	6.53686	6.16159	6.98577	5.82231	6.80907	6.95952
pgaptmp_001803	pgaptmp_001803	pgaptmp_001803	protein_coding	protein_coding	pgaptmp_001803	0.4588	1395				TRUE	0.567959	0.00269308	0.0824208	Chromosome_I	1926511	1927905	1395	+	6.26583	178.083	211.228	168.267	129.403	118.112	103.908	158.886	150.006	152.012	14.126	48.9813	38.9044	33.877	47.7273	44.7934	62.3611	37.2822	37.0437	73.2041	80.919	78.9242	5.26026	6.25776	5.03461	4.99729	4.37789	3.64593	5.42305	4.67274
pgaptmp_005294	pgaptmp_005294	pgaptmp_005294	protein_coding	protein_coding	pgaptmp_005294	0.3824	693	GO:0006355	GO:0003700,GO:0043565		TRUE	0.657641	0.00271944	0.0825616	Chromosome_II	2280845	2281537	693	+	8.49972	99.449	136.418	138.044	506.081	430.12	529.437	328.909	291.056	283.615	308.755	308.401	583.566	191.479	277.484	434.76	1464.64	837.517	1824.4	349.815	300.101	284.127	5.91324	8.13543	8.31432	39.3415	32.0922	37.395	22.5982	18.2508
pgaptmp_000272	pgaptmp_000272	astD	protein_coding	protein_coding	pgaptmp_000272	0.5226	1458	GO:0006527	GO:0043824		TRUE	0.58254	0.00275727	0.0825616	Chromosome_I	287390	288847	1458	+	7.4944	195.814	117.056	158.465	115.95	127.67	98.9602	115.823	195.53	114.009	199.782	297.516	183.407	407.997	317.442	378.109	306.749	468.69	474.953	79.351	67.5387	77.2627	5.53408	3.318	4.53646	4.28428	4.52769	3.32228	3.78243	5.82765
pgaptmp_002810	pgaptmp_002810	pgaptmp_002810	protein_coding	protein_coding	pgaptmp_002810	0.4677	945		GO:0051536,GO:1904047		TRUE	0.69002	0.00276424	0.0825616	Chromosome_I	3044127	3045071	945	-	9.85626	3563.98	4254.48	4381.48	3774.47	3429.35	2756.04	2652.06	2652.34	2591.24	197.764	194.111	205.638	187.06	219.767	229.237	182.027	195.731	190.51	1920.07	2272.74	2030.43	155.404	186.062	193.522	215.173	187.639	142.754	133.624	121.965
pgaptmp_001579	pgaptmp_001579	ectB	protein_coding	protein_coding	pgaptmp_001579	0.455	1266	GO:0019491	GO:0030170,GO:0047307		TRUE	0.624695	0.00277545	0.0825616	Chromosome_I	1644624	1645889	1266	+	5.48281	56.2774	51.0468	62.0791	49.9675	55.9838	42.0581	30.4407	91.7946	50.6707	30.2701	36.2824	57.4303	51.552	43.2875	36.8887	40.4505	50.5972	33.0747	26.8229	29.9464	33.2313	1.83172	1.66639	2.04669	2.12627	2.28651	1.62611	1.14487	3.1508
pgaptmp_001328	pgaptmp_001328	pgaptmp_001328	protein_coding	protein_coding	pgaptmp_001328	0.4247	405		GO:0005515,GO:0070064		TRUE	0.606428	0.0027761	0.0825616	Chromosome_I	1399453	1399857	405	+	8.48211	418.611	407.494	476.212	372.194	393.252	464.288	472.203	380.612	458.147	359.205	399.107	322.351	271.016	332.981	234.507	482.035	379.479	244.753	279.405	270.155	261.696	42.5906	41.5822	49.078	49.5083	50.2065	56.1133	55.5145	40.838
pgaptmp_000520	pgaptmp_000520	endA	protein_coding	protein_coding	pgaptmp_000520	0.4856	696		GO:0004518		TRUE	-0.635483	0.00280831	0.0830502	Chromosome_I	528479	529174	696	-	10.7061	1378.41	1505	1365.74	971.163	964.697	771.89	956.285	939.589	1026.08	2401.42	2066.28	2206.44	3512.9	4010.2	4139.44	2108.48	2625.73	2500.45	1285.26	1393.46	1579.32	81.607	89.3653	81.9031	75.1704	71.668	54.2849	65.42	58.6632
pgaptmp_001352	pgaptmp_001352	pgaptmp_001352	protein_coding	protein_coding	pgaptmp_001352	0.3508	459				TRUE	0.751828	0.00284434	0.0834543	Chromosome_I	1423418	1423876	459	+	7.67073	229.735	219.149	245.049	233.822	247.831	315.023	278.421	182.843	227.314	238.124	208.624	144.502	197.37	185.359	111.984	274.726	252.986	138.914	176.025	165.024	129.602	20.624	19.7319	22.2834	27.4434	27.9181	33.5941	28.8817	17.3102
pgaptmp_004475	pgaptmp_004475	tssE	protein_coding	protein_coding	pgaptmp_004475	0.4258	465	GO:0033103	GO:0003674		TRUE	0.675476	0.00285701	0.0834543	Chromosome_II	1347476	1347940	465	-	4.71277	16.1894	20.2427	32.6732	32.671	43.012	37.9348	27.4709	44.0316	38.003	38.3421	21.7695	20.3785	17.675	25.5285	11.8571	30.3378	27.9616	13.2299	17.8819	21.6633	24.9234	1.43462	1.79911	2.93278	3.78507	4.78278	3.99316	2.81289	4.1148
pgaptmp_002446	pgaptmp_002446	nagA	protein_coding	protein_coding	pgaptmp_002446	0.4538	1137	GO:0006044	GO:0008448		TRUE	-0.663145	0.00286954	0.0834543	Chromosome_I	2662199	2663335	1137	+	11.7908	5228.4	5697	4829.1	3312.59	3339.91	2612.55	4012.98	4188.22	4212.7	2256.13	2518	2413.93	2757.29	3237.68	3210.64	3089.4	2624.4	3045.52	4789.56	4646.79	5381.8	189.481	207.075	177.275	156.954	151.886	112.47	168.05	160.069
pgaptmp_001267	pgaptmp_001267	pgaptmp_001267	protein_coding	protein_coding	pgaptmp_001267	0.4808	1377				TRUE	-0.492406	0.0029475	0.0852506	Chromosome_I	1354530	1355906	1377	+	8.8787	464.866	438.298	424.752	241.509	259.437	238.329	331.136	330.61	380.734	561.005	680.296	583.566	1085.54	910.148	973.598	557.879	688.389	654.88	354.844	352.348	352.251	13.9108	13.1546	12.8749	9.44853	9.74187	8.47181	11.45	10.4332
pgaptmp_005280	pgaptmp_005280	pgaptmp_005280	protein_coding	protein_coding	pgaptmp_005280	0.4484	252				TRUE	0.773584	0.00300343	0.0863937	Chromosome_II	2262995	2263246	252	+	8.10427	340.748	328.284	346.336	696.342	761.243	600.359	887.236	996.308	916.999	62.5581	119.732	53.7251	136.981	75.4757	100.126	124.722	197.063	242.107	333.051	512.912	359.728	55.7174	53.8382	57.3639	148.863	156.195	116.612	167.638	171.803
pgaptmp_003776	pgaptmp_003776	pgaptmp_003776	protein_coding	protein_coding	pgaptmp_003776	0.4456	2226				TRUE	0.525463	0.00302078	0.0864206	Chromosome_II	530004	532229	2226	-	7.96652	196.585	225.31	229.529	401.021	385.059	360.38	339.303	271.652	283.615	250.232	297.516	172.291	197.37	192.019	176.539	284.839	189.074	164.051	287.787	256.774	254.219	3.63902	4.18309	4.30382	9.70524	8.9443	7.92444	7.25764	5.30305
pgaptmp_002261	pgaptmp_002261	pgaptmp_002261	protein_coding	protein_coding	pgaptmp_002261	0.4794	678				TRUE	0.690772	0.0030527	0.0866182	Chromosome_I	2451733	2452410	678	-	7.8617	409.36	431.257	400.247	274.18	322.248	212.765	259.86	338.073	282.911	213.908	199.553	220.458	203.262	243.076	270.078	128.093	141.14	134.945	165.967	143.998	187.757	24.8791	26.2874	24.6399	21.7857	24.5756	15.3604	18.2491	21.668
pgaptmp_003834	pgaptmp_003834	pgaptmp_003834	protein_coding	protein_coding	pgaptmp_003834	0.4337	309				TRUE	0.703033	0.00306366	0.0866182	Chromosome_II	599111	599419	309	-	8.28397	308.369	411.895	389.628	562.454	517.509	697.67	674.151	641.816	658.719	157.404	128.803	170.438	213.572	163.161	158.094	188.769	178.422	240.784	395.079	376.56	328.159	41.1217	55.0896	52.6299	98.0603	86.5971	110.516	103.88	90.2588
pgaptmp_004318	pgaptmp_004318	pgaptmp_004318	protein_coding	protein_coding	pgaptmp_004318	0.4167	192				TRUE	-1.24897	0.00307705	0.0866182	Chromosome_II	1176725	1176916	192	+	10.8951	996.803	1385.3	941.806	1185.13	961.966	2120.22	2851.78	1206.76	1633.43	4019.86	2322.08	2960.44	1548.03	1669.34	1375.42	3133.22	1703	1969.93	3688.15	3781.53	2908.57	213.927	298.185	204.739	332.527	259.061	540.522	707.208	273.123
pgaptmp_000488	pgaptmp_000488	pgaptmp_000488	protein_coding	protein_coding	pgaptmp_000488	0.4181	177				TRUE	1.09459	0.00310428	0.0869197	Chromosome_I	510152	510328	177	+	7.03762	2760.67	1813.92	1636.93	94.8101	88.7548	46.1814	81.6703	133.587	182.274	155.386	197.739	185.259	119.306	105.444	90.9043	53.9339	53.2602	62.1805	22.9112	33.1322	42.3699	642.688	423.532	386.009	28.8566	25.9276	12.7711	21.9697	32.7966
pgaptmp_004646	pgaptmp_004646	pgaptmp_004646	protein_coding	protein_coding	pgaptmp_004646	0.3958	960				TRUE	0.677259	0.00312353	0.0869961	Chromosome_II	1556390	1557349	960	-	10.4944	4957.03	5706.68	5807.67	6422.1	6206.69	4931.52	7291.67	6753.25	7476.04	254.268	243.092	125.976	219.464	209.778	227.92	495.518	312.904	280.474	3752.97	3951.01	3368.82	212.769	245.671	252.506	360.388	334.297	251.445	361.65	305.688
pgaptmp_004985	pgaptmp_004985	pgaptmp_004985	protein_coding	protein_coding	pgaptmp_004985	0.479	906		GO:0015288,GO:0042834		TRUE	0.601566	0.00321373	0.0890372	Chromosome_II	1924825	1925730	906	-	7.20047	127.973	150.5	142.129	249.837	262.168	301.004	257.633	227.621	244.908	76.6841	63.4943	85.2192	107.523	92.1247	114.618	111.239	101.194	121.715	191.672	158.015	186.095	5.82035	6.86515	6.54778	14.8557	14.9622	16.2621	13.5396	10.9175
pgaptmp_003173	pgaptmp_003173	pgaptmp_003173	protein_coding	protein_coding	pgaptmp_003173	0.497	330		GO:0022857	GO:0016020	TRUE	-0.599123	0.00325122	0.0892426	Chromosome_I	3440405	3440734	330	-	8.13107	202.753	211.228	164.183	69.1857	88.0721	91.5382	73.5033	76.8687	73.191	492.393	538.794	639.144	854.29	628.224	687.711	2042.75	2323.48	2077.09	130.762	131.892	128.771	25.3169	26.4533	20.7661	11.2945	13.7997	13.5775	10.6054	10.1222
pgaptmp_003289	pgaptmp_003289	pgaptmp_003289	protein_coding	protein_coding	pgaptmp_003289	0.5133	1734				TRUE	-0.877306	0.00326314	0.0892426	Chromosome_II	25213	26946	1734	-	8.16118	182.709	184.825	175.619	146.059	144.056	233.381	222.737	249.263	286.43	365.259	502.512	503.905	318.149	256.395	280.618	428.101	446.054	534.488	332.492	298.827	363.051	4.34179	4.40506	4.22729	4.53777	4.29562	6.58794	6.11613	6.24665
pgaptmp_001351	pgaptmp_001351	pgaptmp_001351	protein_coding	protein_coding	pgaptmp_001351	0.3465	381				TRUE	0.559109	0.003272	0.0892426	Chromosome_I	1422890	1423270	381	+	7.17458	214.317	219.149	205.025	200.51	193.212	169.057	141.067	117.915	166.087	199.782	146.944	90.777	135.508	110.994	105.396	131.464	135.814	74.0874	140.261	112.777	126.279	23.1787	23.7715	22.4606	28.3515	26.2213	21.7191	17.6292	13.4487
pgaptmp_004197	pgaptmp_004197	pgaptmp_004197	protein_coding	protein_coding	pgaptmp_004197	0.4439	1926				TRUE	0.59355	0.00335711	0.0910918	Chromosome_II	1042796	1044721	1926	+	7.73256	201.982	219.149	232.797	330.554	325.662	397.49	443.247	367.925	404.662	167.494	145.13	135.239	163.493	125.423	130.428	131.464	133.151	120.392	243.641	237.66	219.326	4.3213	4.70246	5.04501	9.24593	8.74288	10.1019	10.9578	8.30119
pgaptmp_001822	pgaptmp_001822	pgaptmp_001822	protein_coding	protein_coding	pgaptmp_001822	0.4747	771				TRUE	0.810747	0.00338826	0.0914183	Chromosome_I	1951371	1952141	771	+	7.56555	242.07	339.725	370.841	231.26	279.236	352.133	270.254	279.862	230.129	157.404	174.156	118.566	144.346	143.182	181.809	65.732	134.482	108.485	179.937	177.767	131.263	12.9373	18.2102	20.0759	16.1588	18.7267	22.3556	16.6898	15.7734
pgaptmp_005015	pgaptmp_005015	pgaptmp_005015	protein_coding	protein_coding	pgaptmp_005015	0.444	1644			GO:0098561	TRUE	-0.923527	0.00341932	0.0914183	Chromosome_II	1970963	1972606	1644	+	10.573	1768.5	1732.95	1458.86	1102.49	918.954	613.553	840.462	987.352	1080.27	2831.26	2771.98	3308.73	1409.58	2054.49	1905.04	1378.69	1396.75	2136.63	1552.93	1448.26	2057.85	44.3262	43.5638	37.0384	36.1273	28.9025	18.2677	24.3416	26.098
pgaptmp_004645	pgaptmp_004645	pgaptmp_004645	protein_coding	protein_coding	pgaptmp_004645	0.3618	1125				TRUE	0.742856	0.00342124	0.0914183	Chromosome_II	1555266	1556390	1125	-	9.90831	2983.47	3112.09	3287.74	4232.5	4003.53	2690.89	3762.77	4009.86	4418.91	177.584	183.226	87.0718	181.168	203.118	113.301	399.448	295.594	301.642	2160.92	2236.42	2173.32	109.277	114.325	121.979	202.679	184.007	117.078	159.253	154.887
pgaptmp_001333	pgaptmp_001333	pgaptmp_001333	protein_coding	protein_coding	pgaptmp_001333	0.3232	594				TRUE	0.603061	0.00346415	0.0915821	Chromosome_I	1404597	1405190	594	+	8.6843	400.109	447.979	437.005	513.127	527.75	534.385	518.235	365.686	489.817	534.771	553.307	335.319	271.016	352.96	252.951	635.409	467.359	244.753	406.255	331.322	304.066	27.7556	31.1683	30.7072	46.5375	45.9394	44.0353	41.5406	26.7522
pgaptmp_000457	pgaptmp_000457	pgaptmp_000457	protein_coding	protein_coding		0.5	1000				TRUE	2.21041	0.0034692	0.0915821	pgaptmp_000457	1	1000	1000	+	7.2968	20.8149	59.8479	67.797	251.759	206.867	409.86	388.305	62.689	135.122	5745.26	440.832	1841.48	203.262	17.759	80.3647	421.359	246.329	130.976	25.1465	29.9464	122.956	0.857695	2.47338	2.82977	13.5628	10.6963	20.0617	18.4887	2.72414
pgaptmp_003511	pgaptmp_003511	pgaptmp_003511	protein_coding	protein_coding	pgaptmp_003511	0.442	138				TRUE	0.772391	0.00347956	0.0915821	Chromosome_II	262599	262736	138	-	6.36493	107.158	132.018	85.7672	247.916	200.04	233.381	179.675	113.437	125.973	78.7021	45.353	38.9044	13.2562	26.6385	32.9363	43.8213	50.5972	43.6586	167.643	121.697	105.509	31.9967	39.5361	25.9408	96.7807	74.9516	82.7789	61.9927	35.7202
pgaptmp_001718	pgaptmp_001718	pgaptmp_001718	protein_coding	protein_coding	pgaptmp_001718	0.4508	417				TRUE	0.645897	0.00357565	0.0928865	Chromosome_I	1814137	1814553	417	-	10.548	2204.84	1887.85	1739.03	1090.32	1273.97	1276.59	1612.62	1979.18	1822.03	3337.78	3858.64	3977.51	1381.59	1363	1177.8	1162.95	1055.88	967.105	740.423	690.041	917.183	217.871	187.1	174.065	140.858	157.968	149.847	184.131	206.247
pgaptmp_003711	pgaptmp_003711	flgB	protein_coding	protein_coding	pgaptmp_003711	0.4683	363	GO:0071973		GO:0030694	TRUE	-0.735699	0.00358105	0.0928865	Chromosome_II	469012	469374	363	+	5.05002	23.8986	38.7251	35.9406	36.5147	30.7228	26.3894	51.972	34.3297	48.5594	18.162	25.3977	25.9363	11.7833	42.1776	18.4444	32.0233	25.2986	30.4287	50.2929	49.6983	72.278	2.71284	4.40888	4.13256	5.41908	4.37621	3.55841	6.81704	4.10961
pgaptmp_002888	pgaptmp_002888	pgaptmp_002888	protein_coding	protein_coding		0.5	1000				TRUE	0.809746	0.00358454	0.0928865	pgaptmp_002888	1	1000	1000	+	9.65862	4136	4847.68	6693.11	3945.51	3586.38	4765.76	3592.01	3632.98	3433.64	193.728	38.0966	116.713	98.6852	120.983	106.714	128.093	129.156	109.808	2433.06	2763.35	1912.46	170.427	200.344	279.363	212.553	185.439	233.273	171.029	157.87
pgaptmp_001405	pgaptmp_001405	pgaptmp_001405	protein_coding	protein_coding	pgaptmp_001405	0.4333	420				TRUE	0.672641	0.0035997	0.0928865	Chromosome_I	1459695	1460114	420	+	6.10972	95.5944	84.4912	81.6831	98.0131	114.016	80.8175	106.171	102.989	106.268	56.5041	34.4683	42.6096	58.9165	51.0571	40.8411	50.5631	85.2164	48.9506	50.2929	57.3442	70.6164	9.37867	8.31388	8.11753	12.5718	14.0365	9.41866	12.0362	10.6556
pgaptmp_001751	pgaptmp_001751	pgaptmp_001751	protein_coding	protein_coding	pgaptmp_001751	0.4237	963	GO:0009966	GO:0009975		TRUE	0.671066	0.00366547	0.0941222	Chromosome_I	1847518	1848480	963	-	9.78314	1778.52	2389.52	2223.41	1875.06	2004.49	2408.86	2205.84	1914.25	1976.86	359.205	335.612	294.562	273.962	247.516	246.364	448.326	367.496	414.096	1450.11	1348.22	1197.16	76.101	102.548	96.3685	104.895	107.627	122.438	109.064	86.3795
pgaptmp_003814	pgaptmp_003814	pgaptmp_003814	protein_coding	protein_coding	pgaptmp_003814	0.4505	657	GO:0006355	GO:0003677,GO:0003700		TRUE	0.574694	0.00375324	0.0955402	Chromosome_II	573513	574169	657	-	5.80234	66.2994	71.2895	81.6831	106.341	92.1685	92.3629	147.007	112.691	116.824	24.216	41.7248	33.3466	29.4583	42.1776	35.5713	23.5961	25.2986	19.8448	60.3515	58.6185	72.278	4.15817	4.48437	5.18929	8.71966	7.25372	6.88121	10.6538	7.45352
pgaptmp_004690	pgaptmp_004690	pgaptmp_004690	protein_coding	protein_coding	pgaptmp_004690	0.4749	678				TRUE	0.584572	0.00376222	0.0955402	Chromosome_II	1603016	1603693	678	-	8.32602	245.153	249.953	272.822	374.756	434.899	459.34	374.198	352.999	385.66	215.926	263.048	268.626	400.633	286.364	305.649	370.796	356.844	396.897	277.17	312.844	259.204	14.8993	15.236	16.7954	29.7772	33.1667	33.1618	26.2788	22.6246
pgaptmp_001365	pgaptmp_001365	pgaptmp_001365	protein_coding	protein_coding	pgaptmp_001365	0.4207	618				TRUE	0.965233	0.00377724	0.0955402	Chromosome_I	1433320	1433937	618	+	7.50097	213.546	196.266	221.361	240.228	273.774	365.328	256.148	217.173	211.832	163.458	143.316	146.355	190.006	130.972	138.333	128.093	173.096	112.454	165.967	178.404	101.355	14.2384	13.125	14.9504	20.9411	22.906	28.9353	19.7349	15.2705
pgaptmp_001288	pgaptmp_001288	pgaptmp_001288	protein_coding	protein_coding	pgaptmp_001288	0.3785	288				TRUE	0.629766	0.0037933	0.0955402	Chromosome_I	1371441	1371728	288	-	7.02601	154.955	146.099	178.069	173.605	176.144	213.589	172.25	143.289	167.495	133.188	68.9366	101.893	110.469	87.685	64.5552	185.398	109.183	99.2242	134.114	122.334	104.678	22.1704	20.9651	25.807	32.4738	31.6242	36.3011	28.4774	21.6201
pgaptmp_003942	pgaptmp_003942	pgaptmp_003942	protein_coding	protein_coding	pgaptmp_003942	0.4744	156				TRUE	-0.637863	0.00390274	0.0978286	Chromosome_II	711570	711725	156	-	6.58601	44.7135	51.0468	48.193	69.1857	79.1966	82.4669	32.6681	26.8667	30.2617	298.665	241.278	229.721	95.7394	122.093	108.031	198.881	190.405	164.051	120.703	105.768	148.71	11.8106	13.5234	12.8944	23.8922	26.2498	25.8754	9.97085	7.48389
pgaptmp_004507	pgaptmp_004507	pgaptmp_004507	protein_coding	protein_coding	pgaptmp_004507	0.4567	1005		GO:0016787,GO:0046872	GO:0016020	TRUE	0.602727	0.00394384	0.0979082	Chromosome_II	1383176	1384180	1005	-	5.7139	56.2774	59.8479	60.4455	70.4669	71.6866	76.6942	76.4731	60.4501	59.8196	58.5221	41.7248	40.757	45.6603	52.167	51.3807	23.5961	41.2767	34.3977	38.5579	49.0611	51.5085	2.30742	2.46107	2.51038	3.77732	3.68821	3.73533	3.62306	2.61378
pgaptmp_002502	pgaptmp_002502	pgaptmp_002502	protein_coding	protein_coding	pgaptmp_002502	0.4635	507				TRUE	-0.631942	0.00396087	0.0979082	Chromosome_I	2718999	2719505	507	+	8.63578	323.017	321.243	294.876	364.506	372.088	288.634	201.948	239.562	249.835	530.735	449.902	498.347	621.57	642.653	678.489	362.369	442.06	324.132	476.106	503.991	635.548	26.2528	26.1859	24.2757	38.7312	37.9473	27.8659	18.9655	20.5327
pgaptmp_004622	pgaptmp_004622	pgaptmp_004622	protein_coding	protein_coding	pgaptmp_004622	0.4091	660				TRUE	0.511919	0.00396171	0.0979082	Chromosome_II	1528618	1529277	660	-	8.41263	312.995	351.167	325.099	332.476	329.076	277.089	334.106	354.491	379.326	419.745	391.85	398.307	446.293	447.304	334.633	423.044	402.115	373.083	226.318	203.253	229.296	19.5412	21.9893	20.5595	27.1382	25.7808	20.5498	24.1031	23.3399
pgaptmp_005075	pgaptmp_005075	pgaptmp_005075	protein_coding	protein_coding	pgaptmp_005075	0.4986	726		GO:0016787		TRUE	-0.657978	0.00405519	0.0995874	Chromosome_II	2036900	2037625	726	+	9.09287	508.038	455.02	420.668	249.837	247.831	228.433	249.466	355.984	363.844	950.48	932.458	974.463	1204.84	1323.04	1341.17	687.658	845.506	1067.65	339.757	342.153	489.33	28.8349	25.9022	24.1849	18.5389	17.6507	15.4012	16.3609	21.3074
pgaptmp_002163	pgaptmp_002163	vscS	protein_coding	protein_coding	pgaptmp_002163	0.4719	267				TRUE	-0.540304	0.00408727	0.0995874	Chromosome_I	2346554	2346820	267	+	8.4544	452.532	510.468	487.648	242.15	296.987	291.933	420.973	480.616	454.629	326.917	448.088	439.064	200.316	187.579	204.205	338.773	323.556	322.809	430.284	387.392	413.729	69.8387	79.013	76.2318	48.8582	57.5136	53.5185	75.0717	78.2212
pgaptmp_004239	pgaptmp_004239	pgaptmp_004239	protein_coding	protein_coding	pgaptmp_004239	0.4712	1095				TRUE	0.747077	0.00410226	0.0995874	Chromosome_II	1090652	1091746	1095	+	8.39736	196.585	192.746	193.589	518.893	466.987	326.569	244.268	256.726	295.579	522.663	598.66	515.02	352.026	328.541	313.554	470.237	523.282	427.325	217.377	266.969	296.589	7.39767	7.27465	7.37917	25.5287	22.0513	14.598	10.6215	10.1881
pgaptmp_001934	pgaptmp_001934	pgaptmp_001934	protein_coding	protein_coding	pgaptmp_001934	0.398	588				TRUE	0.854305	0.00410533	0.0995874	Chromosome_I	2085229	2085816	588	-	10.0902	4183.03	5429.44	5141.13	3317.07	2674.93	4102.73	6025.04	4267.33	4682.11	163.458	174.156	146.355	167.912	154.281	126.476	830.92	591.189	259.306	2168.74	1944.6	1551.9	293.138	381.61	364.941	303.908	235.223	341.529	487.883	315.367
pgaptmp_001719	pgaptmp_001719	pgaptmp_001719	protein_coding	protein_coding	pgaptmp_001719	0.4777	1053	GO:0009061	GO:0008863,GO:0009055	GO:0009326	TRUE	0.785048	0.00413629	0.0998208	Chromosome_I	1814537	1815589	1053	-	11.0402	3971.02	2989.76	2682.47	1663.02	2274.17	1726.86	2018	3219.53	2914.97	5287.17	6314.96	5752.3	2526.05	2018.97	1986.72	734.85	985.314	867.881	890.185	1028.37	1389.07	155.393	117.341	106.328	85.0811	111.671	80.2713	91.2484	132.862
pgaptmp_001423	pgaptmp_001423	pgaptmp_001423	protein_coding	protein_coding	pgaptmp_001423	0.4242	462		GO:0008168		TRUE	0.499172	0.00415288	0.0998208	Chromosome_I	1474849	1475310	462	+	8.76681	329.184	401.333	375.742	475.972	475.862	486.554	314.802	285.086	314.58	435.889	511.582	409.423	580.328	515.01	490.093	768.559	679.068	587.407	364.344	335.145	324.005	29.3599	35.9009	33.946	55.5014	53.2578	51.5492	32.4435	26.8146
pgaptmp_004642	pgaptmp_004642	pgaptmp_004642	protein_coding	protein_coding	pgaptmp_004642	0.2657	429				TRUE	0.875909	0.00421594	0.100131	Chromosome_II	1552335	1552763	429	+	6.51793	232.819	366.129	328.366	309.414	274.457	306.777	246.496	245.532	290.653	12.108	30.8401	11.1155	38.2958	15.5391	9.22218	75.8446	30.6246	38.3667	196.701	180.316	103.848	22.3624	35.271	31.9479	38.855	33.0797	35.0024	27.358	24.8707
pgaptmp_002058	pgaptmp_002058	bioC	protein_coding	protein_coding	pgaptmp_002058	0.4428	822	GO:0009102	GO:0010340		TRUE	0.606521	0.00423685	0.100131	Chromosome_I	2222696	2223517	822	-	10.0107	4035.78	5096.76	6153.19	5559.84	5713.08	5955.76	5390.24	4644.96	4689.15	125.116	152.386	168.586	78.0644	130.972	129.11	153.375	126.493	140.237	3709.94	4187.4	3546.61	202.308	256.25	312.442	364.38	359.37	354.648	312.226	245.554
pgaptmp_005315	pgaptmp_005315	yidD	protein_coding	protein_coding	pgaptmp_005315	0.4558	351				TRUE	0.66715	0.00423991	0.100131	Chromosome_II	2300584	2300934	351	-	6.95798	133.37	147.86	147.846	183.855	186.385	232.557	273.967	273.891	255.465	60.5401	70.7507	50.02	44.1874	71.0359	65.8727	146.633	102.526	138.914	142.497	129.343	104.678	15.657	17.4094	17.581	28.2184	27.4567	32.4305	37.1641	33.9085
pgaptmp_001944	pgaptmp_001944	pgaptmp_001944	protein_coding	protein_coding	pgaptmp_001944	0.4685	2286				TRUE	0.474192	0.00424186	0.100131	Chromosome_I	2097060	2099345	2286	-	7.9935	235.902	227.07	216.46	183.214	210.963	190.498	152.946	229.86	199.164	322.881	326.542	329.761	435.982	440.645	412.363	353.941	419.424	465.692	138.585	138.9	142.064	4.25221	4.10512	3.95223	4.31764	4.77172	4.07895	3.18563	4.36942
pgaptmp_004016	pgaptmp_004016	pgaptmp_004016	protein_coding	protein_coding	pgaptmp_004016	0.4296	135				TRUE	0.679673	0.00429304	0.100886	Chromosome_II	784865	784999	135	-	9.84635	878.852	848.433	847.87	1091.6	759.195	1014.34	1164.92	1317.96	1163.31	1156.32	908.875	1217.15	656.92	749.207	798.377	1235.42	1129.12	1180.11	608.544	584.273	614.778	268.25	259.732	262.142	435.605	290.779	367.776	410.86	424.235
pgaptmp_004697	pgaptmp_004697	pgaptmp_004697	protein_coding	protein_coding	pgaptmp_004697	0.4423	468				TRUE	0.51125	0.00432798	0.100921	Chromosome_II	1608273	1608740	468	-	5.94107	63.9866	76.5702	61.2623	92.2476	95.5821	91.5382	82.4128	84.3317	95.0075	34.3061	45.353	50.02	36.8228	46.6173	34.2538	50.5631	47.9342	54.2426	58.6751	69.4501	63.9702	5.6338	6.76169	5.46372	10.6188	10.5603	9.57391	8.38458	7.83037
pgaptmp_001595	pgaptmp_001595	pgaptmp_001595	protein_coding	protein_coding	pgaptmp_001595	0.4571	1374				TRUE	0.502036	0.00433287	0.100921	Chromosome_I	1661577	1662950	1374	-	6.37374	127.202	149.62	139.678	126.2	114.016	118.752	127.703	111.945	109.786	56.5041	76.1931	66.6933	58.9165	65.4862	63.2378	30.3378	37.2822	44.9816	81.0275	81.5561	88.0628	3.81475	4.50033	4.24309	4.94808	4.29064	4.23046	4.42533	3.54041
pgaptmp_002752	pgaptmp_002752	pgaptmp_002752	protein_coding	protein_coding	pgaptmp_002752	0.4581	1074	GO:0009073	GO:0016832		TRUE	-0.708503	0.00437547	0.101465	Chromosome_I	2979758	2980831	1074	-	10.8448	2054.51	1926.58	1948.96	1905.17	1777.83	1291.43	1791.55	1912.76	1967.01	1570.01	1396.87	1530.24	1524.47	1979.02	2010.43	1614.65	1563.19	1512.18	2401.77	2695.81	3114.6	78.8246	74.135	75.7424	95.5639	85.5912	58.8572	79.425	77.3916
pgaptmp_004255	pgaptmp_004255	pgaptmp_004255	protein_coding	protein_coding	pgaptmp_004255	0.4291	261	GO:0034258	GO:0034257	GO:0016020	TRUE	0.576587	0.00445345	0.102815	Chromosome_II	1104738	1104998	261	+	5.94184	55.5064	80.9708	93.1187	152.465	116.747	122.876	121.763	101.497	112.602	30.2701	47.1672	33.3466	29.4583	28.8583	32.9363	30.3378	30.6246	23.8138	91.6449	85.3791	82.2474	8.76317	12.8212	14.8915	31.4698	23.1285	23.044	22.213	16.8985
pgaptmp_004388	pgaptmp_004388	pgaptmp_004388	protein_coding	protein_coding	pgaptmp_004388	0.4626	441				TRUE	0.528685	0.00447275	0.102815	Chromosome_II	1253796	1254236	441	-	6.29981	37.7752	62.4883	66.1633	64.0609	62.8111	68.4475	69.791	92.5409	80.2286	82.7381	116.104	79.6614	164.966	107.664	98.809	119.666	153.123	111.131	45.8224	43.9639	40.7083	3.52961	5.85601	6.26209	7.82561	7.36447	7.59717	7.53518	9.1187
pgaptmp_002188	pgaptmp_002188	pgaptmp_002188	protein_coding	protein_coding	pgaptmp_002188	0.4076	1494				TRUE	0.535023	0.00452455	0.103553	Chromosome_I	2368459	2369952	1494	-	8.54342	732.377	926.763	876.459	753.356	678.633	656.436	995.635	861.974	902.923	153.368	186.855	116.713	164.966	136.522	150.19	190.454	171.764	146.852	467.724	449.196	535.023	20.1996	25.6366	24.4862	27.1652	23.487	21.5067	31.7309	25.0715
pgaptmp_001070	pgaptmp_001070	pgaptmp_001070	protein_coding	protein_coding	pgaptmp_001070	0.3736	174				TRUE	-0.611485	0.0045592	0.103857	Chromosome_I	1141645	1141818	174	+	9.68696	1019.93	1001.57	712.276	778.339	703.894	705.092	605.845	424.643	541.895	1473.14	1099.36	1059.68	583.274	1041.12	787.837	1048.34	624.476	566.239	1339.47	1011.17	1040.97	241.535	237.889	170.86	240.982	209.171	198.349	165.785	106.05
pgaptmp_004660	pgaptmp_004660	pgaptmp_004660	protein_coding	protein_coding	pgaptmp_004660	0.4356	264				TRUE	0.534398	0.00457729	0.103857	Chromosome_II	1575391	1575654	264	-	8.06012	972.905	1136.23	972.846	707.872	608.312	696.845	2300.13	1509.76	1626.39	62.5581	54.4236	68.5459	32.4041	46.6173	47.4283	69.1029	45.2712	76.7334	468.283	479.779	453.607	151.853	177.871	153.809	144.449	119.142	129.201	414.841	248.509
pgaptmp_004899	pgaptmp_004899	pgaptmp_004899	protein_coding	protein_coding	pgaptmp_004899	0.4606	1407				TRUE	0.746965	0.00471705	0.106569	Chromosome_II	1833673	1835079	1407	-	8.49229	413.986	405.734	410.049	701.466	686.826	437.899	596.193	735.85	753.726	290.593	261.234	235.279	282.799	251.956	243.729	168.544	219.698	175.958	309.022	408.418	370.529	12.1241	11.9176	12.1642	26.8582	25.2404	15.234	20.1756	22.7265
pgaptmp_002012	pgaptmp_002012	pgaptmp_002012	protein_coding	protein_coding	pgaptmp_002012	0.462	855		GO:0005524		TRUE	-0.514378	0.0047415	0.106664	Chromosome_I	2178257	2179111	855	-	8.13785	345.373	362.608	347.153	270.977	332.489	285.335	273.967	414.942	305.432	167.494	297.516	214.901	201.789	160.941	177.856	197.196	226.356	302.964	394.52	451.107	445.299	16.6449	17.5272	16.9471	17.0738	20.1074	16.3351	15.2568	21.0891
pgaptmp_004465	pgaptmp_004465	pgaptmp_004465	protein_coding	protein_coding	pgaptmp_004465	0.4174	714				TRUE	0.689542	0.00477491	0.106958	Chromosome_II	1332884	1333597	714	-	9.0035	463.325	418.936	411.683	737.981	759.878	536.035	600.648	718.685	757.245	558.987	498.883	453.885	459.549	607.135	491.41	493.833	388.8	416.742	362.109	395.675	506.777	26.739	24.2488	24.0661	55.6815	55.0287	36.7475	40.0548	43.7399
pgaptmp_004644	pgaptmp_004644	pgaptmp_004644	protein_coding	protein_coding	pgaptmp_004644	0.2838	444				TRUE	0.621444	0.00480337	0.107139	Chromosome_II	1554826	1555269	444	-	8.73379	1161.78	1408.19	1413.93	1747.58	1415.3	1406.06	1623.01	1440.35	1718.58	72.6481	52.6095	83.3666	73.6457	96.5645	36.8887	229.219	153.123	154.79	1132.15	969.116	895.582	107.82	131.075	132.919	212.04	164.82	155.008	174.049	140.969
pgaptmp_004484	pgaptmp_004484	tssL	protein_coding	protein_coding	pgaptmp_004484	0.4238	1293	GO:0033103	GO:0003674	GO:0033104	TRUE	0.582023	0.00485315	0.107793	Chromosome_II	1358493	1359785	1293	-	5.65157	45.4844	84.4912	56.3613	96.0913	86.7066	97.3109	88.3524	67.9131	97.1188	16.144	29.0259	33.3466	33.877	26.6385	46.1109	23.5961	23.9671	39.6897	70.4101	58.6185	53.17	1.44951	2.70057	1.81938	4.00359	3.46735	3.6838	3.25351	2.2824
pgaptmp_004048	pgaptmp_004048	pgaptmp_004048	protein_coding	protein_coding	pgaptmp_004048	0.4605	747	GO:0042953,GO:0044874		GO:0009279	TRUE	0.550265	0.0048826	0.107833	Chromosome_II	816567	817313	747	+	6.60066	159.581	217.389	194.406	171.683	175.461	184.726	233.874	201.5	204.794	38.3421	45.353	42.6096	51.552	58.8266	36.8887	38.765	43.9397	46.3046	105.615	138.263	117.14	8.80276	12.027	10.8625	12.3814	12.1452	12.1043	14.9071	11.7218
pgaptmp_000748	pgaptmp_000748	glpK	protein_coding	protein_coding	pgaptmp_000748	0.4822	1518	GO:0006072	GO:0004370		TRUE	0.722643	0.00489593	0.107833	Chromosome_I	784424	785941	1518	-	8.33295	481.056	336.205	311.213	250.478	252.61	179.778	201.948	238.815	294.171	397.547	901.618	437.211	508.155	410.676	380.744	492.147	491.326	742.197	115.115	122.334	172.803	13.0582	9.15321	8.55709	8.88919	8.60444	5.79692	6.33434	6.83641
pgaptmp_004422	pgaptmp_004422	pgaptmp_004422	protein_coding	protein_coding	pgaptmp_004422	0.4558	441				TRUE	0.858744	0.00492465	0.108014	Chromosome_II	1292611	1293051	441	+	7.18167	422.466	633.684	655.098	862.259	862.97	460.165	683.061	705.251	744.578	20.18	25.3977	20.3785	17.675	21.0888	21.0793	20.2252	22.6356	31.7517	378.873	447.284	376.344	39.474	59.3849	62.0024	105.333	101.181	51.0749	73.7485	69.4933
pgaptmp_000124	pgaptmp_000124	pgaptmp_000124	protein_coding	protein_coding		0.5	1000				TRUE	2.30388	0.00495402	0.108207	pgaptmp_000124	1	1000	1000	+	10.2623	252.863	512.228	731.064	1647.65	1002.93	3678.02	1956.38	879.139	1099.98	12352.2	3450.46	6196.92	2736.67	374.049	887.964	2604	1548.54	1444.7	205.083	287.995	810.012	10.4194	21.1692	30.5138	88.7622	51.8578	180.031	93.1504	38.2028
pgaptmp_000201	pgaptmp_000201	pgaptmp_000201	protein_coding	protein_coding	pgaptmp_000201	0.4844	609		GO:0004784,GO:0046872		TRUE	-0.645964	0.00500484	0.108866	Chromosome_I	219253	219861	609	-	9.72658	799.447	934.684	1244.85	1254.31	877.307	987.953	871.645	801.524	643.236	639.707	741.976	529.841	456.603	647.093	624.473	635.409	696.378	711.768	1621.67	1657.88	1677.35	54.0917	63.4292	85.318	110.956	74.4866	79.4057	68.1483	57.1922
pgaptmp_000216	pgaptmp_000216	frdD	protein_coding	protein_coding	pgaptmp_000216	0.4735	378				TRUE	0.586413	0.00509464	0.11005	Chromosome_I	234765	235142	378	-	10.0115	2243.39	1779.6	1393.51	1101.21	1097.83	880.746	1216.15	1802.31	1460.3	789.039	627.686	600.239	751.186	1078.86	992.043	1218.57	1098.49	980.335	612.456	662.644	789.242	244.551	194.568	153.872	156.943	150.171	114.049	153.189	207.193
pgaptmp_002780	pgaptmp_002780	vpsR	protein_coding	protein_coding	pgaptmp_002780	0.4449	1335				TRUE	-0.866035	0.00510109	0.11005	Chromosome_I	3010302	3011636	1335	-	11.5193	2335.9	2657.95	2821.33	2304.27	2206.58	3379.49	2683.24	2319.49	2328.04	3220.73	3249.09	2977.11	2872.18	2856.98	2446.51	3219.18	2817.47	2354.92	5792.07	4693.94	4150.58	72.0992	82.2825	88.2092	92.9857	85.4639	123.909	95.6998	75.5004
pgaptmp_001344	pgaptmp_001344	pgaptmp_001344	protein_coding	protein_coding	pgaptmp_001344	0.3333	144				TRUE	0.5076	0.00515377	0.110685	Chromosome_I	1417268	1417411	144	+	7.02929	144.163	121.456	134.777	137.09	124.939	123.7	174.477	152.991	149.197	123.098	128.803	135.239	148.764	175.37	105.396	208.994	145.134	91.2862	84.9391	84.1048	99.6938	41.2523	34.8577	39.0656	51.2871	44.8623	42.0476	57.6912	46.168
pgaptmp_003510	pgaptmp_003510	ahpC	protein_coding	protein_coding	pgaptmp_003510	0.457	558	GO:0006979	GO:0102039		TRUE	-0.586687	0.00517258	0.110685	Chromosome_II	261739	262296	558	-	9.59625	1154.84	1325.46	1028.39	697.623	577.589	631.696	1045.38	928.395	973.299	760.787	729.277	691.016	689.324	874.63	804.964	347.2	442.06	460.4	950.536	862.711	1098.29	85.2799	98.1686	76.9245	67.352	53.5216	55.4124	89.2016	72.2996
pgaptmp_001345	pgaptmp_001345	pgaptmp_001345	protein_coding	protein_coding	pgaptmp_001345	0.3721	387				TRUE	0.605821	0.00520989	0.111032	Chromosome_I	1417430	1417816	387	+	9.12688	464.866	535.111	590.569	573.985	576.906	737.254	715.729	561.962	598.899	577.149	560.564	526.136	634.826	569.397	440.03	871.37	720.345	451.139	434.754	384.843	432.006	49.4966	57.1445	63.6943	79.9013	77.0794	93.2478	88.0583	63.1006
pgaptmp_001287	pgaptmp_001287	pgaptmp_001287	protein_coding	protein_coding	pgaptmp_001287	0.3995	423				TRUE	0.890169	0.0052524	0.111487	Chromosome_I	1370933	1371355	423	+	7.97538	324.558	382.851	399.43	417.036	407.589	632.521	420.973	441.808	448.295	191.71	123.36	137.092	217.991	185.359	115.936	153.375	154.455	85.9943	317.404	270.155	201.049	31.6163	37.4051	39.4132	53.1126	49.8226	73.1926	47.3857	45.3869
pgaptmp_002113	pgaptmp_002113	pgaptmp_002113	protein_coding	protein_coding	pgaptmp_002113	0.409	423				TRUE	0.709741	0.00532634	0.112602	Chromosome_I	2296106	2296528	423	+	8.1797	457.157	515.748	510.519	383.084	285.381	376.874	269.512	195.53	238.574	500.465	359.196	342.729	215.045	230.867	196.301	335.402	235.677	170.666	259.847	184.138	196.064	44.5331	50.3894	50.3747	48.7885	34.8842	43.6102	30.3369	20.0868
pgaptmp_001676	pgaptmp_001676	pgaptmp_001676	protein_coding	protein_coding	pgaptmp_001676	0.4114	666				TRUE	0.574195	0.00538552	0.112647	Chromosome_I	1766940	1767605	666	+	7.34824	144.163	216.509	202.574	201.151	196.626	230.083	249.466	208.217	215.35	169.512	130.617	177.849	144.346	115.433	121.206	114.61	129.156	121.715	151.996	149.095	118.802	8.91942	13.4352	12.6955	16.2709	15.2655	16.9099	17.8348	13.5856
pgaptmp_005042	pgaptmp_005042	pgaptmp_005042	protein_coding	protein_coding	pgaptmp_005042	0.4653	1629			GO:0098561	TRUE	-0.644054	0.00539148	0.112647	Chromosome_II	2000957	2002585	1629	-	12.0862	3223.23	3521.35	3660.22	3692.47	3108.47	3339.08	2958.69	3072.51	2890.34	7956.99	8401.2	9149.95	3988.65	4952.54	4828.47	4397.3	4388.64	3562.81	6222.91	4847.49	4985.52	81.532	89.3366	93.7836	122.112	98.6664	100.332	86.4792	81.9614
pgaptmp_003162	pgaptmp_003162	pgaptmp_003162	protein_coding	protein_coding	pgaptmp_003162	0.4827	3126				TRUE	-0.50886	0.00539267	0.112647	Chromosome_I	3425553	3428678	3126	-	11.249	1901.87	2317.35	2327.15	1659.18	1519.76	1547.08	2114.52	1806.79	1901.56	2407.48	2258.58	2728.87	4421.69	4630.65	4879.85	2733.78	2946.62	3154.01	2290.56	2243.43	2279.66	25.0697	30.6368	31.0725	28.5935	25.1379	24.2246	32.2074	25.1163
pgaptmp_000083	pgaptmp_000083	pgaptmp_000083	protein_coding	protein_coding	pgaptmp_000083	0.463	825		GO:0016787		TRUE	-0.716199	0.00544582	0.113308	Chromosome_I	91140	91964	825	-	12.1849	8551.08	9044.08	9925.31	7862.19	7679.34	5593.73	10292.7	10487.7	10326.3	1009	1220.9	1094.88	1717.42	1889.11	1948.51	2209.61	2422.01	5121.29	10183.8	12679.4	12159.3	427.095	453.056	502.147	513.398	481.298	331.879	594.029	552.414
pgaptmp_001392	pgaptmp_001392	pgaptmp_001392	protein_coding	protein_coding	pgaptmp_001392	0.33	297				TRUE	0.552076	0.00552723	0.113398	Chromosome_I	1451571	1451867	297	+	5.29439	25.4405	39.6053	35.1237	55.0923	54.6184	56.9021	32.6681	30.5982	44.3368	44.3961	21.7695	35.1992	27.9854	34.408	43.476	53.9339	55.9232	31.7517	41.9108	33.7693	32.4005	3.52961	5.5111	4.93611	9.99307	9.50881	9.37788	5.23722	4.4769
pgaptmp_002779	pgaptmp_002779	pgaptmp_002779	protein_coding	protein_coding	pgaptmp_002779	0.4405	252				TRUE	1.27712	0.00554125	0.113398	Chromosome_I	3009523	3009774	252	-	7.84749	63.9866	86.2515	102.921	251.119	292.891	559.125	314.802	249.263	224.499	361.223	361.01	326.056	237.139	204.228	147.555	795.526	471.353	257.983	198.936	151.643	99.6938	10.4628	14.1451	17.0468	53.6837	60.0965	108.603	59.4798	42.9829
pgaptmp_004079	pgaptmp_004079	pgaptmp_004079	protein_coding	protein_coding	pgaptmp_004079	0.4493	345				TRUE	0.660905	0.00555383	0.113398	Chromosome_II	869305	869649	345	+	8.83953	282.929	356.447	351.237	572.063	485.421	649.014	634.801	570.918	555.97	526.699	460.787	476.116	418.307	354.07	376.792	657.32	520.619	547.717	409.608	370.826	306.558	33.7922	42.699	42.4935	89.3284	72.7517	92.0805	87.6095	71.9104
pgaptmp_003174	pgaptmp_003174	pgaptmp_003174	protein_coding	protein_coding	pgaptmp_003174	0.4709	378		GO:0022857	GO:0016020	TRUE	-0.776996	0.00555699	0.113398	Chromosome_I	3440737	3441114	378	-	8.80447	316.849	357.327	310.396	89.0446	126.305	152.564	109.884	111.945	97.1188	900.03	1219.09	1265.32	1546.56	846.881	1038.15	2740.52	3648.33	3061.4	217.377	247.854	186.926	34.5397	39.0676	34.274	12.6905	17.2772	19.7557	13.8412	12.8691
pgaptmp_005279	pgaptmp_005279	pgaptmp_005279	protein_coding	protein_coding	pgaptmp_005279	0.469	420				TRUE	0.826336	0.00555789	0.113398	Chromosome_II	2262472	2262891	420	+	6.32031	83.2597	94.1725	91.4851	171.042	258.072	138.544	167.795	200.754	196.349	16.144	48.9813	42.6096	33.877	35.518	30.3014	38.765	63.9123	66.1495	87.1744	126.794	98.863	8.16852	9.26652	9.09163	21.9391	31.7713	16.1463	19.0223	20.7708
pgaptmp_001561	pgaptmp_001561	pgaptmp_001561	protein_coding	protein_coding	pgaptmp_001561	0.4203	138				TRUE	0.928	0.00559387	0.113692	Chromosome_I	1620152	1620289	138	+	9.89264	1157.93	1369.46	1613.24	1120.42	794.697	1455.54	1155.26	631.368	846.623	2405.46	2039.07	1454.28	598.003	803.594	440.03	1211.83	768.279	566.239	728.13	531.389	534.192	345.748	410.121	487.934	437.389	297.76	516.271	398.598	198.811
pgaptmp_004279	pgaptmp_004279	pgaptmp_004279	protein_coding	protein_coding	pgaptmp_004279	0.413	828				TRUE	0.590993	0.00563694	0.114126	Chromosome_II	1131000	1131827	828	+	7.83748	530.395	745.459	720.445	456.113	487.469	515.418	617.724	618.681	629.865	94.8462	112.476	85.2192	75.1186	78.8055	93.5392	45.5068	55.9232	91.2862	365.462	342.153	265.019	26.3953	37.2079	36.3171	29.6761	30.4411	30.4693	35.522	32.4694
pgaptmp_004360	pgaptmp_004360	pgaptmp_004360	protein_coding	protein_coding	pgaptmp_004360	0.3937	315				TRUE	-0.938705	0.00568217	0.114601	Chromosome_II	1224227	1224541	315	+	5.25107	24.6695	17.6023	26.1386	23.7025	32.0883	53.6035	37.8653	38.0612	30.2617	58.5221	19.9553	38.9044	17.675	25.5285	21.0793	67.4174	57.2548	55.5655	82.1451	79.0075	68.9549	3.22707	2.30941	3.46348	4.05367	5.2672	8.32943	5.72353	5.2506
pgaptmp_004817	pgaptmp_004817	pgaptmp_004817	protein_coding	protein_coding	pgaptmp_004817	0.3972	141				TRUE	-0.627675	0.00572085	0.114941	Chromosome_II	1747261	1747401	141	+	4.37409	25.4405	31.6842	15.5198	18.5776	22.5301	15.6687	38.6078	29.1056	41.5218	14.126	14.513	9.26295	10.3104	7.76955	6.58727	16.8544	15.9781	37.0437	34.6462	38.2294	26.585	7.43471	9.28678	4.59418	7.098	8.26204	5.43935	13.0373	8.97006
pgaptmp_001382	pgaptmp_001382	pgaptmp_001382	protein_coding	protein_coding	pgaptmp_001382	0.4121	495				TRUE	0.647798	0.00577222	0.115037	Chromosome_I	1443705	1444199	495	+	8.05104	417.84	535.111	486.831	294.039	291.525	402.438	337.818	302.997	302.617	244.178	195.925	174.144	253.341	209.778	171.269	220.792	239.671	166.697	230.23	193.696	208.526	34.7827	44.6766	41.0501	32.0011	30.452	39.7948	32.4945	26.5993
pgaptmp_001521	pgaptmp_001521	pgaptmp_001521	protein_coding	protein_coding	pgaptmp_001521	0.4699	1611		GO:0042626,GO:0140359	GO:0055052	TRUE	0.545234	0.00577371	0.115037	Chromosome_I	1579464	1581074	1611	-	5.95555	104.845	100.333	107.005	79.4355	81.9275	66.7982	79.4429	85.8243	72.4872	44.3961	65.3084	40.757	58.9165	54.3869	34.2538	33.7087	38.6137	59.5345	44.7048	49.0611	58.1547	2.68171	2.5739	2.77235	2.65634	2.62953	2.02956	2.34797	2.315
pgaptmp_004490	pgaptmp_004490	pgaptmp_004490	protein_coding	protein_coding	pgaptmp_004490	0.4041	339	GO:0000160	GO:0009927		TRUE	0.522409	0.00579117	0.115037	Chromosome_II	1366917	1367255	339	+	7.79995	303.744	394.292	379.01	500.956	443.774	408.211	477.4	415.688	501.781	100.9	94.3343	118.566	85.429	117.653	102.761	119.666	113.178	89.9633	331.933	331.959	281.635	36.9203	48.0685	46.665	79.6093	67.6871	58.941	67.0526	53.285
pgaptmp_004736	pgaptmp_004736	cpaB	protein_coding	protein_coding	pgaptmp_004736	0.4436	825				TRUE	-0.61187	0.00591085	0.116973	Chromosome_II	1653242	1654066	825	-	9.14925	129.515	139.058	159.282	1064.05	1075.98	1067.12	1015.68	1036.61	1057.75	490.375	580.519	761.415	399.16	369.609	557.283	279.782	258.312	296.35	1973.16	1362.88	1633.32	6.46881	6.96603	8.05849	69.4821	67.4365	63.313	58.6187	54.6007
pgaptmp_003101	pgaptmp_003101	pgaptmp_003101	protein_coding	protein_coding	pgaptmp_003101	0.5011	465				TRUE	0.739213	0.00593774	0.117065	Chromosome_I	3359289	3359753	465	-	10.6248	1343.72	1521.72	1476.01	1268.4	1699.31	2074.87	1843.52	1979.18	1789.66	1674.94	2334.77	2091.58	2028.2	1348.57	1488.72	1786.56	1699	1545.25	951.654	1100.37	1002.75	119.073	135.246	132.489	146.95	188.958	218.409	188.768	184.957
pgaptmp_003833	pgaptmp_003833	pgaptmp_003833	protein_coding	protein_coding	pgaptmp_003833	0.4472	360				TRUE	0.672869	0.00599405	0.117386	Chromosome_II	598755	599114	360	+	8.79433	495.703	642.485	663.267	771.933	786.504	1006.92	1226.54	973.919	982.448	219.962	234.022	226.016	276.908	202.008	221.332	217.421	231.682	218.293	607.427	567.707	448.622	56.7385	73.7568	76.9	115.516	112.965	136.907	162.223	117.559
pgaptmp_001535	pgaptmp_001535	pgaptmp_001535	protein_coding	protein_coding	pgaptmp_001535	0.4094	381				TRUE	0.510079	0.00600771	0.117386	Chromosome_I	1592583	1592963	381	+	7.32879	282.929	286.038	335.717	238.947	206.867	190.498	223.48	205.232	286.43	133.188	74.379	62.9881	119.306	92.1247	61.9203	254.501	154.455	100.547	137.467	146.546	162.002	30.5992	31.027	36.7782	33.7863	28.0744	24.4737	27.9284	23.4076
pgaptmp_005287	pgaptmp_005287	pgaptmp_005287	protein_coding	protein_coding	pgaptmp_005287	0.4795	1026	GO:0055085	GO:0022857	GO:0016020	TRUE	-0.702462	0.00603291	0.117386	Chromosome_II	2272075	2273100	1026	-	9.72261	1055.39	842.272	980.197	1077.5	1116.95	810.649	1147.1	1467.97	1616.54	807.201	1179.18	824.403	415.362	384.038	395.236	345.514	440.728	377.052	1358.47	1549.57	2037.91	42.3863	33.9271	39.8756	56.5764	56.2896	38.6739	53.2335	62.1737
pgaptmp_004634	pgaptmp_004634	pgaptmp_004634	protein_coding	protein_coding	pgaptmp_004634	0.3333	174				TRUE	0.842357	0.00605873	0.117386	Chromosome_II	1543688	1543861	174	-	8.09585	170.374	213.868	206.658	369.631	264.216	468.412	380.138	283.593	317.396	371.313	306.587	248.247	173.804	206.448	100.126	721.366	492.657	386.313	243.082	189.236	183.603	40.3471	50.7971	49.5729	114.441	78.5153	131.768	104.022	70.8246
pgaptmp_004034	pgaptmp_004034	pgaptmp_004034	protein_coding	protein_coding	pgaptmp_004034	0.4308	513				TRUE	0.758492	0.00606551	0.117386	Chromosome_II	804122	804634	513	+	4.70395	23.1277	32.5643	31.8564	44.202	41.6465	66.7982	40.8352	47.0168	51.3744	18.162	10.8847	3.70518	16.2021	11.0994	17.1269	47.1922	13.3151	22.4908	31.2934	28.0349	23.2619	1.85769	2.62341	2.59191	4.64182	4.19764	6.37353	3.79009	3.98266
pgaptmp_003290	pgaptmp_003290	pgaptmp_003290	protein_coding	protein_coding	pgaptmp_003290	0.5161	465	GO:0030254			TRUE	-0.827289	0.00608889	0.117406	Chromosome_II	26956	27420	465	-	6.88896	85.5724	95.0526	67.797	84.5603	93.5339	131.122	154.431	123.139	171.717	98.8822	188.669	170.438	97.2123	77.6955	72.46	87.6426	119.836	130.976	146.967	186.687	239.265	7.58297	8.44798	6.08553	9.79666	10.4006	13.8025	15.813	11.5075
pgaptmp_004892	pgaptmp_004892	pgaptmp_004892	protein_coding	protein_coding	pgaptmp_004892	0.4308	1344				TRUE	-0.747065	0.00623176	0.119475	Chromosome_II	1828406	1829749	1344	+	9.30833	768.61	789.465	853.588	1302.36	1189.31	773.539	590.254	644.055	649.57	371.313	520.653	333.466	243.031	306.342	274.03	358.998	394.126	381.021	1799.93	1619.02	2118.49	23.5649	24.2759	26.5088	52.203	45.7553	28.1719	20.9109	20.8239
pgaptmp_002153	pgaptmp_002153	vscY	protein_coding	protein_coding	pgaptmp_002153	0.4631	339				TRUE	-0.639593	0.00624159	0.119475	Chromosome_I	2339241	2339579	339	-	7.43273	197.356	143.459	191.955	98.6537	100.361	76.6942	112.854	140.304	139.344	258.304	350.125	294.562	213.572	144.292	184.444	225.848	303.583	285.766	120.144	143.998	181.941	23.9888	17.4892	23.6342	15.6775	15.3077	11.0738	15.8507	17.9849
pgaptmp_001300	pgaptmp_001300	pgaptmp_001300	protein_coding	protein_coding	pgaptmp_001300	0.4021	378				TRUE	0.479123	0.00629508	0.119678	Chromosome_I	1382238	1382615	378	+	8.94956	524.227	589.678	608.539	620.109	592.609	650.664	645.938	625.398	672.09	391.493	335.612	313.088	465.441	426.216	417.633	448.326	474.016	449.816	447.607	431.993	468.561	57.146	64.4711	67.1951	88.3773	81.0626	84.2553	81.3639	71.8955
pgaptmp_001739	pgaptmp_001739	nagK	protein_coding	protein_coding	pgaptmp_001739	0.4675	909		GO:0045127		TRUE	0.619471	0.00630946	0.119678	Chromosome_I	1838759	1839667	909	-	10.941	3461.44	3913	3493.59	2937.83	2835.38	3565.87	3232.66	3327	3002.94	1156.32	1229.97	1194.92	960.34	793.604	779.933	1301.16	1300.88	2171.03	1842.96	2239.61	2076.12	156.91	177.905	160.416	174.111	161.284	192.015	169.328	159.047
pgaptmp_004024	pgaptmp_004024	pgaptmp_004024	protein_coding	protein_coding	pgaptmp_004024	0.4483	174				TRUE	0.586469	0.00632036	0.119678	Chromosome_II	792142	792315	174	-	6.59096	50.11	69.5292	81.6831	157.59	149.518	171.531	209.373	97.765	102.045	119.062	105.219	109.303	47.1332	72.1459	54.0156	102.812	77.2273	67.4724	126.291	90.4763	98.863	11.8668	16.5143	19.594	48.7913	44.4311	48.2532	57.2933	24.4158
pgaptmp_000176	pgaptmp_000176	pgaptmp_000176	protein_coding	protein_coding		0.5	1000				TRUE	1.75353	0.00634505	0.119714	pgaptmp_000176	1	1000	1000	+	7.08851	19.2731	74.8099	52.2772	218.448	170.682	290.283	317.029	79.1076	112.602	4732.22	219.509	1276.44	151.71	27.7484	42.1585	358.998	163.775	113.777	21.7936	51.6097	119.633	0.794162	3.09173	2.18199	11.7682	8.82536	14.2087	15.095	3.4376
pgaptmp_004463	pgaptmp_004463	pgaptmp_004463	protein_coding	protein_coding	pgaptmp_004463	0.3614	249				TRUE	0.456506	0.00646174	0.120903	Chromosome_II	1332075	1332323	249	-	7.0577	116.409	110.015	97.2029	150.543	179.558	164.109	186.357	151.498	174.532	123.098	146.944	111.155	138.454	130.972	117.253	106.182	131.819	127.007	119.585	122.334	116.309	19.264	18.2597	16.2937	32.5706	37.2863	32.2601	35.6352	26.4391
pgaptmp_000189	pgaptmp_000189	pgaptmp_000189	protein_coding	protein_coding	pgaptmp_000189	0.4993	1386				TRUE	-0.866465	0.00646248	0.120903	Chromosome_I	206321	207706	1386	-	8.18643	362.334	258.754	258.119	189.62	231.445	133.596	148.491	302.997	251.946	211.89	250.349	194.522	450.712	448.414	447.934	404.505	440.728	514.643	258.17	320.49	457.761	10.7722	7.71554	7.77315	7.3703	8.63434	4.71807	5.10118	9.49976
pgaptmp_004782	pgaptmp_004782	pgaptmp_004782	protein_coding	protein_coding	pgaptmp_004782	0.4734	828				TRUE	0.44665	0.00647785	0.120903	Chromosome_II	1707685	1708512	828	+	7.32776	111.013	121.456	129.876	165.918	187.751	156.687	193.781	194.784	199.868	135.206	136.059	201.932	191.479	247.516	230.554	165.173	129.156	171.989	122.938	121.06	128.771	5.5246	6.06221	6.54696	10.7951	11.7245	9.26266	11.1433	10.2226
pgaptmp_000983	pgaptmp_000983	pgaptmp_000983	protein_coding	protein_coding	pgaptmp_000983	0.4652	948				TRUE	-0.567537	0.006531	0.120903	Chromosome_I	1039617	1040564	948	-	9.72985	794.821	858.114	893.613	1544.51	1426.22	1167.73	683.061	664.205	593.973	736.571	823.611	629.881	425.672	602.695	578.362	542.71	525.945	523.904	2017.3	1894.27	2292.13	34.5477	37.4092	39.3443	87.7699	77.7898	60.293	34.3071	30.4461
pgaptmp_001860	pgaptmp_001860	pgaptmp_001860	protein_coding	protein_coding	pgaptmp_001860	0.4714	630				TRUE	1.20019	0.00654727	0.120903	Chromosome_I	1990677	1991306	630	-	6.45456	782.487	363.488	193.589	289.555	392.569	164.109	136.612	400.762	364.547	28.252	23.5836	22.2311	25.0395	43.2875	30.3014	11.798	21.3041	10.5839	90.5272	90.4763	178.618	51.1793	23.8447	12.8257	24.7602	32.2196	12.7504	10.3248	27.6429
pgaptmp_003333	pgaptmp_003333	pgaptmp_003333	protein_coding	protein_coding	pgaptmp_003333	0.4242	825	GO:0006355	GO:0003700,GO:0043565		TRUE	-0.619156	0.00654995	0.120903	Chromosome_II	69464	70288	825	+	8.15895	563.545	719.936	723.712	1062.13	776.263	781.786	1478.23	1191.09	1299.84	38.3421	36.2824	68.5459	33.877	44.3975	63.2378	65.732	65.2438	74.0874	1470.23	1361.61	1251.16	28.147	36.0646	36.6145	69.3566	48.6518	46.3838	85.3142	62.7377
pgaptmp_000874	pgaptmp_000874	pgaptmp_000874	protein_coding	protein_coding	pgaptmp_000874	0.4653	288				TRUE	0.7739	0.00657398	0.120903	Chromosome_I	920871	921158	288	+	10.2505	6399.43	8735.16	8183.01	8447.06	7447.21	11364.8	11322.5	7830.16	8578.83	110.99	92.5202	122.271	100.158	114.323	71.1425	112.924	110.515	116.423	4901.88	5838.27	5458.23	915.603	1253.49	1185.94	1580.07	1337.04	1931.53	1871.9	1181.45
pgaptmp_000231	pgaptmp_000231	pgaptmp_000231	protein_coding	protein_coding	pgaptmp_000231	0.4689	1881	GO:0006935			TRUE	0.516092	0.00659176	0.120903	Chromosome_I	249387	251267	1881	-	10.5119	2362.11	2521.53	2216.06	1811.64	1947.14	1628.72	1801.2	2336.66	2177.43	1356.1	1409.57	1376.48	706.999	879.07	823.409	1243.85	1081.18	1102.05	1375.23	1139.87	1282.73	51.7451	55.401	49.1738	51.8857	53.5246	42.3829	45.5938	53.9814
pgaptmp_000020	pgaptmp_000020	hemG	protein_coding	protein_coding	pgaptmp_000020	0.4034	528				TRUE	-0.499984	0.00666123	0.121314	Chromosome_I	24294	24821	528	+	10.6944	2123.12	1950.34	2108.24	1633.55	1595.54	1530.58	1868.77	1616.48	1834	1414.62	1193.69	1387.59	1539.19	1587.21	1620.47	1238.8	1290.23	1194.66	2409.59	2316.07	2088.58	165.691	152.657	166.658	166.672	156.249	141.891	168.521	133.038
pgaptmp_005204	pgaptmp_005204	pgaptmp_005204	protein_coding	protein_coding	pgaptmp_005204	0.4444	441				TRUE	0.820927	0.00668439	0.121314	Chromosome_II	2175358	2175798	441	+	10.5821	1137.11	995.412	938.539	2094.15	2263.25	1232.05	1415.87	1563.49	1643.28	2883.73	3006	1641.4	1075.23	1569.45	847.123	3357.39	2342.12	1864.09	1000.27	917.507	1256.14	106.248	93.2837	88.8289	255.819	265.361	136.749	152.868	154.062
pgaptmp_001401	pgaptmp_001401	pgaptmp_001401	protein_coding	protein_coding	pgaptmp_001401	0.3681	345				TRUE	0.580145	0.00669417	0.121314	Chromosome_I	1456781	1457125	345	+	5.89777	67.8412	67.769	74.3316	94.8101	76.4657	94.8369	76.4731	61.9427	70.376	48.4321	45.353	46.3148	47.1332	48.8372	35.5713	70.7883	49.2657	30.4287	49.7341	61.8043	62.3086	8.10275	8.11809	8.99281	14.8047	11.4602	13.4552	10.5541	7.80205
pgaptmp_004312	pgaptmp_004312	focA	protein_coding	protein_coding	pgaptmp_004312	0.4442	1452	GO:0015724	GO:0015499	GO:0005886	TRUE	0.775317	0.0067064	0.121314	Chromosome_II	1167435	1168886	1452	-	11.6379	41065.5	38359.9	45677.2	53121.8	47145.2	37002.9	71352.4	79334.4	77673.2	121.08	97.9626	77.8088	51.552	91.0148	105.396	143.262	98.5314	92.6092	22800	28861.3	29269.3	1165.38	1091.82	1313.03	1970.93	1678.86	1247.39	2339.78	2374.28
pgaptmp_002356	pgaptmp_002356	pgaptmp_002356	protein_coding	protein_coding	pgaptmp_002356	0.4578	996				TRUE	-0.506474	0.0067553	0.121781	Chromosome_I	2561039	2562034	996	-	7.97478	279.074	332.684	311.213	174.886	230.08	168.232	185.614	205.232	232.241	215.926	272.118	231.574	315.204	297.463	288.522	244.388	284.942	254.014	279.964	280.349	269.173	11.5456	13.8043	13.0418	9.45933	11.9444	8.26767	8.87329	8.95412
pgaptmp_001647	pgaptmp_001647	pgaptmp_001647	protein_coding	protein_coding	pgaptmp_001647	0.4484	1104				TRUE	0.535592	0.00678862	0.121963	Chromosome_I	1720083	1721186	1104	-	7.34974	379.294	371.409	413.316	258.806	275.823	222.661	272.482	300.758	344.138	100.9	68.9366	68.5459	85.429	59.9366	89.5869	112.924	105.189	71.4414	163.731	203.253	153.695	14.1568	13.9035	15.6262	12.629	12.9183	9.87204	11.7517	11.8382
pgaptmp_001286	pgaptmp_001286	pgaptmp_001286	protein_coding	protein_coding	pgaptmp_001286	0.378	381				TRUE	0.619189	0.00695046	0.124143	Chromosome_I	1369371	1369751	381	+	6.2726	151.101	132.018	153.564	155.668	207.55	160.81	123.99	167.917	142.863	60.5401	36.2824	25.9363	42.7145	64.3763	46.1109	13.4835	33.2876	14.5529	133.556	112.14	90.5552	16.3418	14.3202	16.8231	22.0109	28.167	20.6596	15.4951	19.1517
pgaptmp_002423	pgaptmp_002423	znuC	protein_coding	protein_coding	pgaptmp_002423	0.4689	789	GO:0006829	GO:0005524,GO:0015633		TRUE	-0.500339	0.00695806	0.124143	Chromosome_I	2637057	2637845	789	+	10.9522	1809.36	1858.81	1948.96	1789.86	1624.21	1563.57	2044.73	1701.56	1777.7	2062.4	2302.12	1984.12	1771.92	2243.18	2416.21	1975.33	2051.85	1882.61	2370.47	2490.01	2268.03	94.4942	97.3641	103.102	122.21	106.441	97.0004	123.393	93.7146
pgaptmp_002416	pgaptmp_002416	pgaptmp_002416	protein_coding	protein_coding	pgaptmp_002416	0.4545	429				TRUE	-0.648157	0.00698189	0.124143	Chromosome_I	2627811	2628239	429	+	10.0305	1556.49	1586.85	1605.07	1609.21	1259.64	1064.65	1527.98	1173.93	1371.63	734.553	707.507	703.985	378.539	667.072	654.775	674.174	603.172	543.748	2269.89	1850.3	2119.32	149.502	152.869	156.163	202.078	151.821	121.473	169.587	118.911
pgaptmp_001896	pgaptmp_001896	pgaptmp_001896	protein_coding	protein_coding	pgaptmp_001896	0.4621	1545	GO:0008150	GO:0003824	GO:0005575	TRUE	0.67512	0.00700426	0.124143	Chromosome_I	2036880	2038424	1545	-	10.2934	2665.85	2517.13	2166.24	1531.7	1270.56	954.142	1441.85	1788.13	1750.25	837.471	979.626	794.762	879.329	951.215	1046.06	1339.92	1150.42	2230.56	716.395	752.483	898.075	71.0993	67.3317	58.5219	53.4082	42.5217	30.2285	44.435	50.293
pgaptmp_005058	pgaptmp_005058	pgaptmp_005058	protein_coding	protein_coding	pgaptmp_005058	0.4458	498				TRUE	0.587679	0.00707476	0.124972	Chromosome_II	2022254	2022751	498	-	10.1106	1000.66	1237.44	1168.07	1921.83	2027.71	1556.97	2104.12	2242.63	2085.94	748.679	990.51	881.833	556.761	571.617	612.616	827.549	728.334	666.786	1028.77	1342.49	1318.45	82.797	102.692	97.8993	207.897	210.533	153.033	201.175	195.688
pgaptmp_001374	pgaptmp_001374	pgaptmp_001374	protein_coding	protein_coding	pgaptmp_001374	0.354	435				TRUE	0.569176	0.00721975	0.126722	Chromosome_I	1439190	1439624	435	+	8.09012	296.805	349.406	398.613	357.46	352.971	423.88	383.85	373.149	368.066	274.448	273.932	200.08	201.789	159.831	156.777	254.501	201.057	171.989	279.405	272.066	216.003	28.1152	33.1958	38.2476	44.2692	41.956	47.6965	42.0151	37.2761
pgaptmp_001526	pgaptmp_001526	pgaptmp_001526	protein_coding	protein_coding	pgaptmp_001526	0.4875	1038		GO:0003824		TRUE	0.541175	0.00724069	0.126722	Chromosome_I	1586240	1587277	1038	+	5.41759	52.4227	83.6111	40.8415	55.0923	53.2529	47.8308	45.2899	47.7631	53.4857	34.3061	36.2824	38.9044	20.6208	37.7378	52.6982	30.3378	41.2767	38.3667	34.6462	38.8666	28.2466	2.08104	3.32896	1.64227	2.85929	2.65271	2.2555	2.07748	1.99955
pgaptmp_001389	pgaptmp_001389	pgaptmp_001389	protein_coding	protein_coding	pgaptmp_001389	0.363	675				TRUE	0.59934	0.00724695	0.126722	Chromosome_I	1449676	1450350	675	+	8.27045	439.426	519.269	440.272	495.19	426.023	589.638	499.674	341.804	425.774	203.818	174.156	166.733	206.208	190.909	122.523	367.425	296.926	168.02	358.756	305.198	341.451	26.825	31.7929	27.2244	39.5214	32.6342	42.7577	35.2465	22.0045
pgaptmp_002183	pgaptmp_002183	pgaptmp_002183	protein_coding	protein_coding	pgaptmp_002183	0.4414	981				TRUE	-0.541094	0.00728502	0.126722	Chromosome_I	2363991	2364971	981	-	11.0689	3759.02	3206.27	3294.28	2447.77	2480.36	2291.75	2378.09	2597.86	2606.73	1759.7	2115.27	2004.5	820.413	986.733	931.44	1580.94	1709.65	1570.39	3451.21	3142.46	4037.6	157.893	135.074	140.163	134.42	130.734	114.349	115.423	115.076
pgaptmp_004069	pgaptmp_004069	elbB	protein_coding	protein_coding	pgaptmp_004069	0.4716	651				TRUE	0.54324	0.00731505	0.126722	Chromosome_II	858905	859555	651	-	8.75019	618.28	681.21	740.049	786.667	865.018	628.397	913.965	1020.94	956.409	207.854	172.342	216.753	195.898	175.37	221.332	267.984	280.948	259.306	489.518	583.636	497.638	39.1347	43.2456	47.4483	65.099	68.705	47.2483	66.8469	68.1483
pgaptmp_004064	pgaptmp_004064	pgaptmp_004064	protein_coding	protein_coding	pgaptmp_004064	0.4292	480		GO:0008199,GO:0016491		TRUE	0.671426	0.00731829	0.126722	Chromosome_II	853845	854324	480	+	10.3008	6644.58	7422.03	9069.27	3074.28	2228.43	3142.81	10862.2	7707.76	8546.46	284.538	272.118	224.164	197.37	166.49	155.46	365.74	342.197	288.412	1902.19	1871.33	1602.58	570.407	639.032	788.628	345.038	240.05	320.487	1077.48	697.79
pgaptmp_001569	pgaptmp_001569	pgaptmp_001569	protein_coding	protein_coding	pgaptmp_001569	0.4658	1185				TRUE	0.515371	0.00736688	0.126836	Chromosome_I	1628822	1630006	1185	+	6.91901	104.075	124.977	129.876	124.919	106.506	118.752	108.399	107.467	107.675	92.8282	99.7767	92.6295	172.331	154.281	115.936	259.557	202.389	190.51	81.5863	88.5649	71.4472	3.61897	4.35865	4.57459	5.67902	4.64728	4.9052	4.35551	3.94089
pgaptmp_004887	pgaptmp_004887	pgaptmp_004887	protein_coding	protein_coding	pgaptmp_004887	0.4193	477				TRUE	-0.454481	0.00738358	0.126836	Chromosome_II	1819657	1820133	477	-	7.59935	255.946	231.471	261.386	221.01	206.867	184.726	218.282	214.934	199.868	191.71	248.535	179.701	103.104	119.873	97.4916	173.6	142.471	134.945	271.582	279.075	305.728	22.11	20.0548	22.872	24.9608	22.4242	18.9558	21.7888	19.5805
pgaptmp_001349	pgaptmp_001349	pgaptmp_001349	protein_coding	protein_coding	pgaptmp_001349	0.4212	501		GO:0038023	GO:0016020	TRUE	0.437964	0.00739717	0.126836	Chromosome_I	1420542	1421042	501	+	8.65485	473.347	414.535	473.762	452.91	434.899	409.86	381.623	373.895	403.254	415.709	371.895	311.235	410.943	469.503	433.442	503.945	446.054	379.698	337.521	309.021	316.528	38.9314	34.1952	39.4697	48.7011	44.8843	40.0434	36.2685	32.4302
pgaptmp_004425	pgaptmp_004425	nirD	protein_coding	protein_coding	pgaptmp_004425	0.4969	324				TRUE	0.823595	0.00745531	0.127418	Chromosome_II	1295160	1295483	324	-	7.6191	627.531	462.941	524.405	820.62	749.637	620.151	679.348	1097.06	938.111	54.4861	59.866	88.9244	29.4583	43.2875	36.8887	21.9107	38.6137	38.3667	296.728	375.286	570.747	79.8084	59.0504	67.5559	136.446	119.633	93.6882	99.8344	147.137
pgaptmp_004800	pgaptmp_004800	pgaptmp_004800	protein_coding	protein_coding	pgaptmp_004800	0.4679	1872	GO:0006935			TRUE	-0.559078	0.00750175	0.127797	Chromosome_II	1725809	1727680	1872	+	9.5907	531.166	606.401	513.787	629.078	686.143	503.873	743.2	879.139	774.839	1309.68	1434.97	1411.67	653.974	801.374	752.266	648.893	655.101	701.184	902.478	790.712	1020.2	11.6918	13.3874	11.4556	18.1035	18.9519	13.1749	18.9031	20.4075
pgaptmp_001562	pgaptmp_001562	pgaptmp_001562	protein_coding	protein_coding	pgaptmp_001562	0.4529	1764	GO:0000160,GO:0006355	GO:0005524,GO:0043565		TRUE	0.606853	0.00762389	0.128889	Chromosome_I	1620353	1622116	1764	-	6.55154	127.973	160.181	181.336	163.355	119.478	147.616	142.552	104.482	123.158	56.5041	83.4496	77.8088	41.2416	64.3763	44.7934	55.6194	93.2054	58.2115	107.292	91.1135	80.5858	2.98936	3.75279	4.29069	4.98883	3.50213	4.09606	3.84775	2.57383
pgaptmp_004675	pgaptmp_004675	pgaptmp_004675	protein_coding	protein_coding	pgaptmp_004675	0.3881	219				TRUE	-0.912235	0.00763764	0.128889	Chromosome_II	1588505	1588723	219	-	7.90267	196.585	225.31	209.926	195.386	154.297	289.459	277.679	161.2	190.719	365.259	230.393	372.371	125.198	168.71	183.126	303.378	186.411	257.983	477.783	447.284	315.697	36.9884	42.5185	40.0094	48.0632	36.4298	64.6957	60.3715	31.986
pgaptmp_005189	pgaptmp_005189	pgaptmp_005189	protein_coding	protein_coding	pgaptmp_005189	0.4412	306				TRUE	-0.590755	0.00763932	0.128889	Chromosome_II	2159643	2159948	306	-	7.87456	135.682	135.538	120.074	157.59	195.261	142.668	109.884	140.304	137.937	324.899	283.003	301.972	484.589	482.822	463.744	323.604	475.348	357.207	242.524	214.722	306.558	18.2709	18.3055	16.3783	27.7441	32.9942	22.8211	17.098	19.9244
pgaptmp_004587	pgaptmp_004587	pgaptmp_004587	protein_coding	protein_coding	pgaptmp_004587	0.4373	798				TRUE	0.51682	0.00768242	0.129202	Chromosome_II	1478344	1479141	798	+	5.67139	53.1937	58.9678	79.2326	77.5136	77.8312	80.8175	103.202	78.3613	75.3023	34.3061	32.6542	33.3466	22.0937	33.2981	28.984	55.6194	26.6301	34.3977	49.1753	62.4414	49.0161	2.74673	3.05389	4.14421	5.23286	5.04306	4.95719	6.15767	4.26713
pgaptmp_001296	pgaptmp_001296	pgaptmp_001296	protein_coding	protein_coding	pgaptmp_001296	0.3394	657				TRUE	0.711824	0.00771406	0.129247	Chromosome_I	1379233	1379889	657	+	6.17721	84.8015	76.5702	79.2326	89.0446	83.9757	127.824	85.3826	65.6742	71.7835	58.5221	70.7507	33.3466	58.9165	61.0465	44.7934	114.61	110.515	72.7644	70.4101	53.5212	54.0008	5.31859	4.81655	5.03361	7.3014	6.60895	9.5231	6.18781	4.34377
pgaptmp_003177	pgaptmp_003177	pgaptmp_003177	protein_coding	protein_coding	pgaptmp_003177	0.4789	1353	GO:0006468	GO:0004674,GO:0005524		TRUE	-0.591259	0.00773744	0.129247	Chromosome_I	3443532	3444884	1353	+	10.2568	1543.39	1492.68	1318.36	848.166	843.854	611.904	707.562	785.852	831.844	1594.22	1763.33	1580.26	1821.99	2246.51	2132.96	1011.26	1338.16	1332.25	1128.8	1045.58	1337.56	47.0041	45.5942	40.6704	33.7713	32.2488	22.137	24.9	25.2395
pgaptmp_003168	pgaptmp_003168	pgaptmp_003168	protein_coding	protein_coding	pgaptmp_003168	0.5016	612		GO:0016830,GO:0016832,GO:0016833		TRUE	-0.566228	0.00777628	0.129247	Chromosome_I	3435222	3435833	612	-	12.586	3217.06	3315.4	3180.74	2894.27	2896.14	2967.98	4036.74	4389.72	4165.55	5371.93	5703.6	6524.83	12116.2	8740.75	12320.8	20956.7	21659.6	60127.2	3690.38	4616.2	4827.67	216.604	223.886	216.929	254.772	244.687	237.379	314.06	311.69
pgaptmp_003826	pgaptmp_003826	gltS	protein_coding	protein_coding	pgaptmp_003826	0.4564	1227	GO:0015813	GO:0015501	GO:0016020	TRUE	0.701507	0.00778332	0.129247	Chromosome_II	589691	590917	1227	-	8.22666	269.823	276.357	349.604	417.036	379.598	578.917	586.541	526.14	472.926	205.836	206.81	214.901	248.922	241.966	185.761	252.815	225.024	206.386	324.11	275.252	251.727	9.06134	9.30823	11.8925	18.3102	15.9964	23.0943	22.7608	18.6335
pgaptmp_001617	pgaptmp_001617	pgaptmp_001617	protein_coding	protein_coding	pgaptmp_001617	0.4416	2382	GO:0006508	GO:0004222,GO:0008270	GO:0005576	TRUE	0.510575	0.00782356	0.129272	Chromosome_I	1690412	1692793	2382	-	6.84786	139.537	146.98	174.802	126.84	135.863	136.895	122.505	114.93	108.379	96.8642	70.7507	88.9244	79.5373	117.653	106.714	138.206	151.792	127.007	107.292	89.202	80.5858	2.41383	2.5501	3.06299	2.86867	2.9492	2.81306	2.44876	2.09666
pgaptmp_001350	pgaptmp_001350	pgaptmp_001350	protein_coding	protein_coding	pgaptmp_001350	0.378	381				TRUE	0.798796	0.00783392	0.129272	Chromosome_I	1422281	1422661	381	+	5.6683	86.3433	82.731	107.822	65.9827	100.361	113.804	75.7306	78.3613	85.8587	38.3421	48.9813	22.2311	38.2958	42.1776	25.0316	16.8544	35.9507	10.5839	64.2632	48.424	40.7083	9.33818	8.97397	11.812	9.32973	13.6202	14.6206	9.4641	8.93746
pgaptmp_004071	pgaptmp_004071	yddG	protein_coding	protein_coding	pgaptmp_004071	0.4817	903			GO:0016020	TRUE	0.505616	0.00811043	0.133315	Chromosome_II	859844	860746	903	+	8.38836	186.563	180.424	249.133	380.521	377.549	383.471	288.073	285.832	287.134	464.141	388.222	492.789	435.982	527.22	437.395	340.458	406.109	388.959	265.435	309.658	231.788	8.51328	8.25749	11.5156	22.7016	21.6187	20.7863	15.1897	13.755
pgaptmp_004770	pgaptmp_004770	cyoE	protein_coding	protein_coding	pgaptmp_004770	0.4521	909	GO:0006783	GO:0008495	GO:0016020	TRUE	0.514929	0.0081296	0.133315	Chromosome_II	1696381	1697289	909	-	6.08947	42.4008	65.1286	55.5445	86.4822	86.7066	105.558	109.141	91.0483	81.6361	54.4861	63.4943	38.9044	63.3353	81.0254	61.9203	58.9902	49.2657	71.4414	60.3515	63.0786	68.1241	1.92206	2.96108	2.55046	5.12539	4.93211	5.68406	5.71686	4.35257
pgaptmp_000081	pgaptmp_000081	pgaptmp_000081	protein_coding	protein_coding	pgaptmp_000081	0.4919	1551				TRUE	-0.553424	0.00821618	0.133928	Chromosome_I	89008	90558	1551	-	9.37313	632.928	461.181	474.579	304.289	377.549	281.212	325.196	307.475	353.991	1004.97	925.202	965.2	1540.67	1931.29	1839.17	1109.02	1268.93	1471.16	459.901	416.701	559.116	16.8151	12.2886	12.7714	10.5691	12.5865	8.87472	9.98313	8.6146
pgaptmp_002636	pgaptmp_002636	recN	protein_coding	protein_coding	pgaptmp_002636	0.4589	1665	GO:0006281,GO:0006310	GO:0005524		TRUE	-0.555645	0.00821788	0.133928	Chromosome_I	2852624	2854288	1665	+	11.7945	10315.7	11071	9464.62	2873.77	2513.13	2111.15	3401.94	3135.94	3136.66	4179.29	3530.28	3992.33	1648.19	2343.08	2136.91	3313.57	2998.55	2657.88	3938.49	3499.91	3701.96	255.296	274.798	237.263	92.9827	78.0448	62.0637	97.2848	81.8449
pgaptmp_004408	pgaptmp_004408	pgaptmp_004408	protein_coding	protein_coding	pgaptmp_004408	0.4434	1563				TRUE	0.537231	0.00825821	0.13417	Chromosome_II	1276515	1278077	1563	+	6.24728	77.0923	65.1286	61.2623	117.872	95.5821	91.5382	99.4893	91.0483	81.6361	82.7381	70.7507	38.9044	70.6999	59.9366	77.7298	75.8446	67.9068	80.7023	77.6746	61.1671	67.2933	2.0324	1.72209	1.63597	4.06271	3.162	2.86666	3.03075	2.53134
pgaptmp_004109	pgaptmp_004109	atpB	protein_coding	protein_coding	pgaptmp_004109	0.4023	768	GO:0015986	GO:0015078	GO:0045263	TRUE	0.578209	0.00829422	0.134214	Chromosome_II	924364	925131	768	+	4.68552	30.8369	27.2836	28.5891	33.9523	41.6465	49.4801	21.5313	44.7779	26.7429	16.144	10.8847	33.3466	23.5666	14.4292	19.7618	26.967	14.6466	14.5529	27.9405	24.8491	24.9234	1.6545	1.46819	1.55375	2.38162	2.80389	3.15357	1.33488	2.53361
pgaptmp_000054	pgaptmp_000054	rhlB	protein_coding	protein_coding	pgaptmp_000054	0.4855	1314		GO:0003676,GO:0003724,GO:0005524		TRUE	-0.666551	0.00831191	0.134214	Chromosome_I	59635	60948	1314	-	13.002	9240.28	7990.58	7929.79	4293.36	4865.81	3369.6	6783.09	8433.17	8010.19	11641.9	10826.7	11108.1	13416.8	15337.1	14820	8174.36	8596.2	9477.89	5826.71	6229.49	7998.76	289.766	251.319	251.888	176.022	191.471	125.521	245.79	278.89
pgaptmp_001601	pgaptmp_001601	pgaptmp_001601	protein_coding	protein_coding	pgaptmp_001601	0.3968	252				TRUE	0.647129	0.00844381	0.135487	Chromosome_I	1669604	1669855	252	+	8.29117	393.942	505.187	526.039	511.846	329.076	474.184	600.648	373.895	446.184	302.701	257.605	135.239	147.291	164.271	114.618	552.823	387.468	205.063	278.287	294.367	272.496	64.4154	82.8502	87.1281	109.422	67.521	92.1042	113.489	64.4743
pgaptmp_004249	pgaptmp_004249	pgaptmp_004249	protein_coding	protein_coding	pgaptmp_004249	0.481	420		GO:0016790		TRUE	0.533815	0.00844764	0.135487	Chromosome_II	1101461	1101880	420	+	5.74442	56.2774	73.9298	60.4455	99.9349	93.5339	68.4475	104.686	98.5113	80.9323	34.3061	27.2118	24.0837	36.8228	37.7378	32.9363	37.0796	35.9507	35.7207	61.4691	56.707	58.1547	5.52132	7.27465	6.00697	12.8184	11.515	7.97703	11.8679	10.1923
pgaptmp_004590	pgaptmp_004590	pgaptmp_004590	protein_coding	protein_coding	pgaptmp_004590	0.458	1740				TRUE	0.542709	0.00846795	0.135487	Chromosome_II	1480455	1482194	1740	-	5.69108	53.9646	46.6462	68.6138	90.3258	71.0039	65.9735	61.624	64.9279	93.6	30.2701	29.0259	35.1992	36.8228	53.2769	44.7934	47.1922	38.6137	35.7207	51.4105	54.1584	45.693	1.27796	1.10792	1.6459	2.79658	2.10997	1.85589	1.68629	1.62151
pgaptmp_000276	pgaptmp_000276	pgaptmp_000276	protein_coding	protein_coding	pgaptmp_000276	0.4413	213				TRUE	-0.496994	0.00854848	0.136065	Chromosome_I	291958	292170	213	-	9.6768	899.667	1063.18	1016.14	849.447	752.368	898.064	1127.05	1037.35	956.409	486.339	439.017	526.136	558.234	587.156	657.409	987.665	750.969	759.396	1215.41	1187.66	1181.37	174.045	206.286	199.12	214.843	182.639	206.377	251.94	211.634
pgaptmp_002685	pgaptmp_002685	pgaptmp_002685	protein_coding	protein_coding	pgaptmp_002685	0.4557	1128				TRUE	-0.517259	0.00855921	0.136065	Chromosome_I	2909586	2910713	1128	-	12.5609	6542.05	5974.23	6203.01	3807.14	4185.81	4169.52	4010.01	4133	3806.64	9109.27	8771.28	10217	8220.33	8519.87	9041.69	6119.82	6557.67	5956.1	5586.43	5777.74	6255.78	238.981	218.884	229.527	181.825	191.873	180.93	169.266	159.218
pgaptmp_000104	pgaptmp_000104	glpE	protein_coding	protein_coding	pgaptmp_000104	0.4611	321		GO:0004792		TRUE	-0.517819	0.00858163	0.136065	Chromosome_I	109326	109646	321	+	11.1141	2038.32	1944.18	2570.57	1969.87	1824.25	2007.24	2153.13	1915	2043.01	1915.09	2262.21	2045.26	2137.2	2136.63	2154.04	2469.16	2749.56	2239.82	2540.35	3061.54	2818.84	261.653	250.307	334.245	330.596	293.849	306.075	319.372	259.24
pgaptmp_001337	pgaptmp_001337	pgaptmp_001337	protein_coding	protein_coding	pgaptmp_001337	0.3729	960				TRUE	0.645207	0.00862002	0.136264	Chromosome_I	1408484	1409443	960	+	8.46078	296.805	319.482	334.901	360.022	410.32	468.412	364.547	338.819	328.656	367.277	435.389	311.235	400.633	386.258	305.649	495.518	504.641	309.579	330.816	241.483	221.819	12.7397	13.7536	14.5608	20.2033	22.1002	23.883	18.0807	15.3368
pgaptmp_000984	pgaptmp_000984	rlmA	protein_coding	protein_coding	pgaptmp_000984	0.4484	843		GO:0008168		TRUE	-0.638831	0.00870324	0.137167	Chromosome_I	1040648	1041490	843	-	10.3131	1303.63	1453.07	1522.57	1119.78	949.677	1285.66	1027.56	891.08	829.732	1519.56	1444.04	1508.01	955.921	1250.9	1305.6	1417.45	1222.32	1058.39	2085.48	1619.02	1609.22	63.7214	71.2363	75.3861	71.5601	58.2495	74.6502	58.038	45.9332
pgaptmp_004372	pgaptmp_004372	pgaptmp_004372	protein_coding	protein_coding	pgaptmp_004372	0.4325	978				TRUE	0.483609	0.00879746	0.138238	Chromosome_II	1237231	1238208	978	-	9.32813	612.884	585.278	584.034	904.539	903.251	778.487	886.494	923.917	943.038	585.221	522.467	516.873	477.224	554.968	505.902	611.813	565.89	504.059	569.428	595.105	698.687	25.8224	24.7323	24.9253	49.8256	47.7544	38.9624	43.1588	41.0517
pgaptmp_004405	pgaptmp_004405	pgaptmp_004405	protein_coding	protein_coding	pgaptmp_004405	0.4733	1122	GO:0055085	GO:0022857	GO:0016020	TRUE	0.582063	0.00884294	0.138539	Chromosome_II	1271630	1272751	1122	-	5.57266	60.132	54.5672	59.6287	65.3421	51.2047	66.7982	64.5938	76.1224	74.5985	40.3601	36.2824	25.9363	42.7145	36.6279	26.3491	35.3941	43.9397	46.3046	34.6462	45.2382	37.3852	2.20836	2.00993	2.21821	3.13736	2.35972	2.9141	2.74114	2.9482
pgaptmp_001702	pgaptmp_001702	pgaptmp_001702	protein_coding	protein_coding	pgaptmp_001702	0.4514	2364				TRUE	0.468091	0.00890949	0.139041	Chromosome_I	1798288	1800651	2364	+	10.5207	1817.84	2156.29	2051.88	1626.51	1628.31	1776.34	1903.66	1914.25	1738.29	1295.56	1413.2	1161.57	1440.51	1305.29	1237.09	1087.11	937.38	1427.51	1241.68	1225.25	1210.45	31.6859	37.6965	36.2281	37.0657	35.615	36.7799	38.342	35.1876
pgaptmp_001608	pgaptmp_001608	pgaptmp_001608	protein_coding	protein_coding	pgaptmp_001608	0.4611	1620				TRUE	0.564264	0.00896889	0.139041	Chromosome_I	1678272	1679891	1620	+	7.69765	311.453	358.208	316.114	263.29	253.293	290.283	308.862	329.864	292.06	115.026	130.617	124.124	113.414	92.1247	84.317	257.872	256.981	317.517	147.526	213.448	185.264	7.92201	9.13821	8.14459	8.75556	8.08447	8.77081	9.07784	8.84824
pgaptmp_001158	pgaptmp_001158	pgaptmp_001158	protein_coding	protein_coding	pgaptmp_001158	0.4439	669				TRUE	0.735593	0.00900393	0.139041	Chromosome_I	1230056	1230724	669	+	6.44924	471.805	426.857	477.029	271.618	221.204	150.914	511.553	461.212	522.19	14.126	18.1412	33.3466	16.2021	22.1987	18.4444	8.42718	18.6411	17.1989	111.203	115.325	156.187	29.0599	26.3692	29.7618	21.8724	17.0967	11.0417	36.408	29.9579
pgaptmp_004607	pgaptmp_004607	pgaptmp_004607	protein_coding	protein_coding	pgaptmp_004607	0.3955	708	GO:0006310,GO:0015074	GO:0003677		TRUE	0.560132	0.00903425	0.139041	Chromosome_II	1499413	1500120	708	+	8.6307	309.911	275.477	316.114	339.523	435.581	398.315	368.259	349.267	381.438	468.177	468.043	402.012	544.978	459.514	424.22	765.188	623.145	542.426	284.434	296.278	216.003	18.0369	16.0803	18.6359	25.8345	31.8112	27.5376	24.7658	21.4369
pgaptmp_002514	pgaptmp_002514	pgaptmp_002514	protein_coding	protein_coding	pgaptmp_002514	0.4043	141				TRUE	0.675016	0.00904121	0.139041	Chromosome_I	2735188	2735328	141	+	6.55446	185.792	244.672	209.926	276.743	168.634	257.297	314.802	179.111	204.09	42.3781	30.8401	20.3785	17.675	39.9577	46.1109	35.3941	35.9507	42.3356	147.526	152.918	138.741	54.2959	71.7146	62.1423	105.736	61.8401	89.3198	106.304	55.2003
pgaptmp_002944	pgaptmp_002944	ppa	protein_coding	protein_coding	pgaptmp_002944	0.4557	531	GO:0006796	GO:0004427		TRUE	0.569923	0.00908391	0.139041	Chromosome_I	3203719	3204249	531	+	9.42995	691.518	914.441	900.964	867.384	979.717	1166.08	1111.46	1008.25	1092.23	474.231	460.787	335.319	574.436	500.581	546.743	493.833	585.863	545.071	752.717	678.573	618.932	53.662	71.171	70.8197	87.9997	95.4003	107.49	99.6624	82.5107
pgaptmp_001092	pgaptmp_001092	pgaptmp_001092	protein_coding	protein_coding	pgaptmp_001092	0.4529	1146				TRUE	0.560378	0.00911704	0.139041	Chromosome_I	1160088	1161233	1146	+	6.69647	147.246	166.342	153.564	128.122	161.807	147.616	155.916	169.41	137.233	70.6301	41.7248	42.6096	100.158	77.6955	89.5869	85.9572	55.9232	108.485	81.0275	116.6	95.5399	5.29441	5.99873	5.59302	6.02285	7.30056	6.30494	6.47797	6.42378
pgaptmp_004278	pgaptmp_004278	pgaptmp_004278	protein_coding	protein_coding	pgaptmp_004278	0.4557	564		GO:0015288	GO:0009279	TRUE	0.692533	0.0091323	0.139041	Chromosome_II	1130130	1130693	564	-	7.90697	375.439	511.348	546.46	413.833	344.778	514.593	855.311	738.835	616.493	123.098	148.758	140.797	82.4832	68.8161	75.0949	158.431	81.2219	113.777	310.14	266.332	215.172	27.4296	37.4696	40.4408	39.5285	31.6086	44.6599	72.2067	56.9254
pgaptmp_001314	pgaptmp_001314	pgaptmp_001314	protein_coding	protein_coding	pgaptmp_001314	0.3773	774				TRUE	0.631847	0.00913676	0.139041	Chromosome_I	1389011	1389784	774	+	8.90671	539.646	608.161	543.193	556.689	572.127	776.838	616.982	591.068	583.417	500.465	458.973	420.538	524.357	320.772	297.745	455.068	431.408	310.902	474.989	381.02	384.652	28.7294	32.4727	29.2923	38.7468	38.2204	49.1272	37.9546	33.1844
pgaptmp_000483	pgaptmp_000483	pgaptmp_000483	protein_coding	protein_coding	pgaptmp_000483	0.4876	603	GO:0009143	GO:0047429		TRUE	-0.737365	0.00913911	0.139041	Chromosome_I	506604	507206	603	-	9.2821	561.232	499.906	454.158	238.947	331.806	211.115	234.617	335.834	347.657	1273.36	1676.25	1506.16	1743.93	1921.3	2080.26	610.128	768.279	918.154	390.608	358.72	578.224	38.3516	34.262	31.4362	21.3476	28.4519	17.137	18.5257	24.2016
pgaptmp_002952	pgaptmp_002952	pgaptmp_002952	protein_coding	protein_coding	pgaptmp_002952	0.5	300				TRUE	-0.592942	0.00916927	0.139098	Chromosome_I	3212822	3213121	300	+	9.32151	945.922	1027.1	907.499	871.228	869.797	578.917	875.357	817.196	819.88	443.961	379.151	289.004	321.095	542.759	561.235	325.289	370.159	384.99	1264.03	1086.99	1185.53	129.925	141.492	126.26	156.45	149.913	94.4557	138.93	118.37
pgaptmp_004488	pgaptmp_004488	pgaptmp_004488	protein_coding	protein_coding	pgaptmp_004488	0.4149	2145	GO:0006468	GO:0004674,GO:0005524		TRUE	0.577657	0.00928481	0.140126	Chromosome_II	1363102	1365246	2145	+	7.511	165.748	232.351	231.163	276.743	299.035	332.341	374.941	300.012	258.983	117.044	108.847	131.534	101.631	129.863	101.444	111.239	141.14	132.299	212.907	234.474	161.172	3.18405	4.47671	4.49813	6.95046	7.20841	7.58385	8.32278	6.07783
pgaptmp_001159	pgaptmp_001159	pgaptmp_001159	protein_coding	protein_coding	pgaptmp_001159	0.4531	384				TRUE	0.894621	0.00932312	0.140126	Chromosome_I	1230749	1231132	384	+	6.65624	466.408	364.368	433.737	320.945	261.485	153.388	455.869	463.451	453.221	26.234	18.1412	14.8207	13.2562	27.7484	30.3014	37.0796	38.6137	37.0437	94.9977	138.263	157.018	50.0487	39.2149	47.1451	45.026	35.2095	19.5521	56.5251	52.4457
pgaptmp_003172	pgaptmp_003172	pgaptmp_003172	protein_coding	protein_coding	pgaptmp_003172	0.4401	609				TRUE	-0.581211	0.00932515	0.140126	Chromosome_I	3439744	3440352	609	-	9.30821	308.369	336.205	267.921	221.651	294.939	330.692	251.693	250.756	254.761	1202.73	1244.49	1235.68	1415.47	1046.67	1140.92	2821.42	2597.77	3769.2	462.136	414.152	417.052	20.8647	22.8154	18.3624	19.6072	25.0414	26.579	19.6783	17.8925
pgaptmp_004535	pgaptmp_004535	nirD	protein_coding	protein_coding	pgaptmp_004535	0.4315	336		GO:0008942,GO:0051537		TRUE	0.53623	0.00934352	0.140126	Chromosome_II	1413449	1413784	336	-	5.15953	24.6695	22.883	32.6732	44.202	62.1284	43.7074	47.5173	41.0464	40.8181	42.3781	41.7248	24.0837	23.5666	34.408	32.9363	33.7087	27.9616	34.3977	34.0874	33.7693	29.9081	3.02538	2.8146	4.05876	7.08707	9.56081	6.3672	6.73356	5.30851
pgaptmp_003545	pgaptmp_003545	pgaptmp_003545	protein_coding	protein_coding	pgaptmp_003545	0.4489	1722				TRUE	0.504171	0.00937684	0.140226	Chromosome_II	298034	299755	1722	-	10.1296	1152.53	1437.23	1311.83	2147.32	1779.19	1794.48	1798.97	1619.47	1673.54	1065.51	847.195	637.291	651.028	756.977	550.696	825.863	720.345	631.066	1457.94	1291.52	1325.93	27.5789	34.4933	31.7969	67.1781	53.4237	51.008	49.7421	40.8673
pgaptmp_004872	pgaptmp_004872	fdhF	protein_coding	protein_coding	pgaptmp_004872	0.4968	4239	GO:0015942	GO:0008863	GO:0009326	TRUE	0.437598	0.00944068	0.140781	Chromosome_II	1798758	1802996	4239	-	8.22141	336.122	260.515	243.416	309.414	305.18	298.53	443.989	496.288	429.293	223.998	330.17	300.12	303.42	334.091	293.792	219.107	262.307	355.884	202.848	245.306	228.465	3.26732	2.53986	2.39677	3.93225	3.72252	3.44713	4.98703	5.08754
pgaptmp_003691	pgaptmp_003691	pgaptmp_003691	protein_coding	protein_coding	pgaptmp_003691	0.4485	912				TRUE	-0.553599	0.00948079	0.14098	Chromosome_II	448748	449659	912	-	8.39171	296.805	287.798	299.777	391.412	421.244	366.153	438.792	489.571	523.597	256.286	317.471	398.307	213.572	149.841	169.952	252.815	267.633	260.629	499.576	537.124	721.949	13.4102	13.0417	13.7197	23.1208	23.8827	19.6517	22.9085	23.327
pgaptmp_003591	pgaptmp_003591	pgaptmp_003591	protein_coding	protein_coding	pgaptmp_003591	0.4508	996		GO:0008720,GO:0070404		TRUE	-0.636163	0.00955407	0.141553	Chromosome_II	341938	342933	996	-	11.8903	3981.05	4051.18	4585.69	4238.91	3729.07	2724.71	5550.61	6096.51	5686.38	2268.24	2655.87	2580.66	2559.92	3219.93	3279.14	3217.5	3323.44	3049.49	5077.91	6001.38	5691.68	164.701	168.098	192.17	229.276	193.591	133.904	265.347	265.986
pgaptmp_004359	pgaptmp_004359	pgaptmp_004359	protein_coding	protein_coding	pgaptmp_004359	0.3511	225				TRUE	0.63671	0.00957311	0.141553	Chromosome_II	1223548	1223772	225	-	7.97036	205.836	250.833	200.124	449.707	391.204	515.418	449.929	235.83	354.695	264.358	224.951	148.207	142.873	168.71	108.031	303.378	207.715	181.249	362.109	259.96	255.05	37.6962	46.0728	37.1242	107.674	89.901	112.127	95.2126	45.5464
pgaptmp_001019	pgaptmp_001019	rnt	protein_coding	protein_coding	pgaptmp_001019	0.4512	645	GO:0006364,GO:0042780	GO:0016896		TRUE	-0.502376	0.00963181	0.142022	Chromosome_I	1080286	1080930	645	-	11.1273	1585.79	1446.91	1649.18	1673.27	1455.58	1340.09	1090.67	1053.77	1184.43	4467.86	3646.38	3883.03	3786.86	4203.33	4454.31	2929.29	3405.99	2987.31	2003.33	2086.05	2319.54	101.308	92.7095	106.721	139.756	116.686	101.696	80.5131	70.9945
pgaptmp_003093	pgaptmp_003093	recG	protein_coding	protein_coding	pgaptmp_003093	0.4851	2082	GO:0006281,GO:0006310	GO:0003676,GO:0003678,GO:0005524		TRUE	-0.480408	0.00976048	0.14324	Chromosome_I	3345625	3347706	2082	+	11.2148	2877.08	3141.14	2906.28	1604.08	1539.55	1500.9	2209.55	2237.4	2325.22	2223.84	2209.6	2149.01	3000.33	3268.76	3379.27	2450.62	2705.62	2897.35	2037.98	2082.87	2442.5	56.9416	62.3516	58.2637	41.506	38.2348	35.286	50.5308	46.6982
pgaptmp_001880	pgaptmp_001880	pgaptmp_001880	protein_coding	protein_coding	pgaptmp_001880	0.4271	1728				TRUE	0.472085	0.009796	0.14324	Chromosome_I	2017130	2018857	1728	+	5.82549	44.7135	64.2485	82.4999	84.5603	78.5139	70.0968	58.6541	60.4501	50.6707	34.3061	38.0966	50.02	44.1874	51.0571	30.3014	74.1592	86.5479	48.9506	50.8517	52.2469	61.4778	1.06624	1.5366	1.99274	2.63625	2.34934	1.98558	1.61617	1.52017
pgaptmp_003675	pgaptmp_003675	pgaptmp_003675	protein_coding	protein_coding	pgaptmp_003675	0.4595	1260		GO:0016788		TRUE	0.52855	0.00979604	0.14324	Chromosome_II	430317	431576	1260	-	7.16613	181.938	171.623	199.307	221.01	198.674	149.265	209.373	186.574	230.129	123.098	101.591	98.1873	89.8477	115.433	72.46	114.61	141.14	141.56	127.968	140.812	122.956	5.94991	5.62919	6.60226	9.44943	8.15295	5.79856	7.91194	6.43456
pgaptmp_001661	pgaptmp_001661	pgaptmp_001661	protein_coding	protein_coding	pgaptmp_001661	0.4444	1206				TRUE	0.441442	0.00982705	0.143295	Chromosome_I	1746817	1748022	1206	-	6.52676	113.326	166.342	142.945	133.247	134.498	136.895	134.385	113.437	123.158	68.6121	68.9366	61.1355	70.6999	63.2664	69.8251	53.9339	49.2657	50.2736	109.527	92.3878	93.8783	3.87203	5.70028	4.94725	5.95214	5.76649	5.55614	5.30561	4.08739
pgaptmp_004404	pgaptmp_004404	pgaptmp_004404	protein_coding	protein_coding	pgaptmp_004404	0.4684	1014				TRUE	0.45983	0.0098711	0.14354	Chromosome_II	1270627	1271640	1014	-	5.52259	39.3171	32.5643	34.3069	41.6396	45.0601	44.5321	54.1994	58.9575	58.412	30.2701	52.6095	40.757	54.4978	46.6173	63.2378	65.732	73.2328	52.9196	28.4993	29.3092	33.2313	1.59772	1.32723	1.41216	2.21224	2.29773	2.14965	2.54501	2.52661
pgaptmp_005076	pgaptmp_005076	pgaptmp_005076	protein_coding	protein_coding	pgaptmp_005076	0.4862	654				TRUE	-0.465597	0.0100046	0.14508	Chromosome_II	2037657	2038310	654	+	9.06221	510.351	536.871	557.079	326.07	297.67	339.763	379.396	380.612	411.699	674.013	645.827	794.762	768.861	946.776	898.504	626.982	652.438	732.936	415.196	449.833	490.992	32.1551	33.9261	35.5533	26.8594	23.5343	25.4291	27.6215	25.2896
pgaptmp_002389	pgaptmp_002389	pgaptmp_002389	protein_coding	protein_coding	pgaptmp_002389	0.4477	612				TRUE	-0.47455	0.0100426	0.145232	Chromosome_I	2601597	2602208	612	+	10.5942	997.574	1108.07	1088.84	810.37	910.078	717.462	894.661	710.476	870.551	2815.11	2265.84	2378.73	4844.41	6191.22	6064.24	1732.63	1732.29	2139.27	1242.24	1050.67	1133.19	67.1664	74.8266	74.2595	71.3339	76.8902	57.3826	69.6049	50.447
pgaptmp_003304	pgaptmp_003304	agaR	protein_coding	protein_coding	pgaptmp_003304	0.4488	771				TRUE	0.485175	0.010156	0.14647	Chromosome_II	40313	41083	771	-	8.41876	320.704	470.863	501.534	736.7	718.231	692.722	896.888	851.526	866.328	165.476	154.2	151.912	163.493	172.04	181.809	136.52	158.449	145.529	545.958	561.973	436.991	17.1399	25.2395	27.1511	51.4755	48.1675	43.9782	55.3881	47.9933
pgaptmp_005047	pgaptmp_005047	pgaptmp_005047	protein_coding	protein_coding	pgaptmp_005047	0.4444	900		GO:0001216		TRUE	-0.546249	0.0102248	0.147059	Chromosome_II	2010060	2010959	900	-	7.20278	196.585	185.705	142.945	180.011	182.289	126.174	261.345	259.712	277.281	74.6661	81.6355	88.9244	104.577	112.104	111.984	80.9009	77.2273	113.777	212.907	246.58	270.004	9.0005	8.5275	6.62931	10.7751	10.4728	6.86216	13.8262	12.5397
pgaptmp_002162	pgaptmp_002162	vscR	protein_coding	protein_coding	pgaptmp_002162	0.467	651				TRUE	-0.449641	0.0103098	0.147367	Chromosome_I	2345890	2346540	651	+	9.34814	918.169	889.798	1001.43	520.174	606.264	514.593	723.153	900.781	864.92	722.445	943.343	796.614	412.416	331.871	382.062	453.382	531.271	546.394	696.277	753.12	821.643	58.1166	56.4875	64.207	43.0459	48.1531	38.6915	52.8911	60.1279
pgaptmp_004894	pgaptmp_004894	pgaptmp_004894	protein_coding	protein_coding	pgaptmp_004894	0.4167	408		GO:0022857	GO:0016020	TRUE	-0.579401	0.0103227	0.147367	Chromosome_II	1830245	1830652	408	+	7.33661	229.735	183.064	189.505	320.304	347.509	229.258	124.733	167.171	152.012	151.35	146.944	133.387	66.2811	78.8055	80.3647	70.7883	70.5698	55.5655	459.342	388.029	514.254	23.202	18.5432	19.3866	42.2928	44.0403	27.5041	14.5564	17.8048
pgaptmp_002357	pgaptmp_002357	pgaptmp_002357	protein_coding	protein_coding	pgaptmp_002357	0.4803	1470		GO:0000287,GO:0005524,GO:0016779		TRUE	-0.614706	0.0103429	0.147367	Chromosome_I	2562249	2563718	1470	-	10.5935	1867.95	1634.38	1916.29	778.339	929.195	767.766	1179.76	1489.61	1464.52	1519.56	1625.45	1624.72	2505.43	2030.07	2275.24	2187.7	2331.47	2327.14	975.124	1324.65	1538.61	52.3607	45.9491	54.4106	28.5244	32.6839	25.5649	38.213	44.0345
pgaptmp_004049	pgaptmp_004049	pgaptmp_004049	protein_coding	protein_coding	pgaptmp_004049	0.4593	1230				TRUE	0.43816	0.0103582	0.147367	Chromosome_II	817380	818609	1230	+	7.67502	235.902	271.076	296.51	335.038	335.22	335.64	423.201	367.179	420.144	110.99	114.29	124.124	159.075	118.763	126.476	80.9009	122.499	111.131	239.73	277.163	228.465	7.90288	9.1081	10.0618	14.6742	14.0919	13.3568	16.3823	12.9721
pgaptmp_004086	pgaptmp_004086	pgaptmp_004086	protein_coding	protein_coding	pgaptmp_004086	0.4694	20780				TRUE	0.480607	0.0104477	0.148105	Chromosome_II	872625	893399	20775	+	12.1504	3049	2793.49	2617.13	3339.49	3765.94	2997.67	3674.42	4541.22	4305.6	3206.61	3149.32	3099.38	11727.3	11159.3	10219.5	11712.1	12465.6	12127.8	2396.74	2316.7	2587.88	6.04603	5.55576	5.25678	8.65763	9.37068	7.06108	8.4193	9.49652
pgaptmp_001315	pgaptmp_001315	pgaptmp_001315	protein_coding	protein_coding	pgaptmp_001315	0.3736	819				TRUE	0.471275	0.0104673	0.148105	Chromosome_I	1389963	1390781	819	+	8.5517	389.316	432.137	475.396	590.641	580.32	517.892	539.766	455.988	597.492	316.827	317.471	244.542	203.262	344.08	230.554	330.345	290.268	203.74	467.724	387.392	369.698	19.5874	21.8062	24.2277	38.8512	36.6376	30.9519	31.3801	24.194
pgaptmp_002889	pgaptmp_002889	pgaptmp_002889	protein_coding	protein_coding	pgaptmp_002889	0.4249	273				TRUE	0.63344	0.0105193	0.148105	Chromosome_I	3141035	3141307	273	-	11.1075	10681.9	14706.8	15272.3	9550.19	9913.91	11468.7	12342.6	10059.3	10011.7	300.683	344.683	314.94	279.854	257.505	227.92	350.571	356.844	247.399	7533.32	7094.11	5567.9	1612.29	2226.36	2334.98	1884.58	1877.7	2056.28	2152.67	1601.2
pgaptmp_004792	pgaptmp_004792	pgaptmp_004792	protein_coding	protein_coding	pgaptmp_004792	0.4551	1191	GO:0055085	GO:0022857		TRUE	0.520405	0.0105505	0.148105	Chromosome_II	1715844	1717034	1191	-	8.88073	347.686	496.386	475.396	698.263	669.075	837.863	795.172	705.998	650.274	345.079	333.798	340.877	350.553	324.101	349.125	391.021	332.876	403.512	539.252	545.407	467.73	12.0291	17.2246	16.6604	31.5843	29.0474	34.4345	31.7894	25.759
pgaptmp_001453	pgaptmp_001453	pgaptmp_001453	protein_coding	protein_coding	pgaptmp_001453	0.375	240				TRUE	0.583576	0.0105508	0.148105	Chromosome_I	1504881	1505120	240	-	6.06064	97.1363	146.98	138.044	141.574	155.662	188.849	169.28	141.797	166.791	28.252	27.2118	38.9044	23.5666	21.0888	22.3967	25.2815	19.9726	19.8448	125.173	107.042	88.8936	16.6774	25.3097	24.0076	31.7788	33.5364	38.5156	33.5836	25.6739
pgaptmp_001568	pgaptmp_001568	pgaptmp_001568	protein_coding	protein_coding	pgaptmp_001568	0.4788	777				TRUE	0.436854	0.010594	0.148316	Chromosome_I	1627944	1628720	777	-	7.46134	141.85	187.465	162.549	151.184	131.767	138.544	147.007	163.439	135.122	221.98	190.483	201.932	241.558	325.211	268.761	279.782	258.312	234.169	97.233	109.591	103.017	7.52256	9.97104	8.73183	10.4821	8.76857	8.72771	9.00842	9.14056
pgaptmp_004033	pgaptmp_004033	pgaptmp_004033	protein_coding	protein_coding	pgaptmp_004033	0.3726	636	GO:0000160,GO:0006355	GO:0003677		TRUE	0.608718	0.0106635	0.148893	Chromosome_II	803316	803951	636	+	5.39304	48.5681	44.0058	44.1089	74.9512	61.4456	67.6228	55.6843	27.613	59.1158	30.2701	21.7695	20.3785	23.5666	27.7484	17.1269	89.3281	63.9123	42.3356	45.2636	50.9726	31.5697	3.14668	2.85953	2.89474	6.34871	4.99549	5.20438	4.16877	1.88666
pgaptmp_004552	pgaptmp_004552	pgaptmp_004552	protein_coding	protein_coding	pgaptmp_004552	0.445	1290				TRUE	0.411843	0.0107801	0.150123	Chromosome_II	1436598	1437887	1290	-	8.84155	578.963	645.126	608.539	566.939	585.099	530.262	665.242	655.996	707.278	347.097	458.973	405.717	357.918	336.311	339.903	335.402	324.887	275.182	397.314	434.541	441.145	18.4935	20.6679	19.6897	23.6761	23.4522	20.1203	24.554	22.0978
pgaptmp_003906	pgaptmp_003906	pgaptmp_003906	protein_coding	protein_coding	pgaptmp_003906	0.4304	1401		GO:0016780		TRUE	0.560839	0.0108114	0.150161	Chromosome_II	675010	676410	1401	-	6.60015	117.951	115.295	127.426	185.776	220.522	147.616	167.795	165.678	164.68	100.9	74.379	40.757	47.1332	67.7061	46.1109	42.1359	70.5698	34.3977	139.703	102.582	129.602	3.46914	3.40107	3.79629	7.1436	8.13873	5.15736	5.70262	5.13883
pgaptmp_001275	pgaptmp_001275	pgaptmp_001275	protein_coding	protein_coding	pgaptmp_001275	0.3694	333				TRUE	0.664086	0.0110883	0.153603	Chromosome_I	1362679	1363011	333	+	8.99983	654.513	839.631	776.806	750.793	742.127	1039.91	873.13	770.179	814.954	330.953	350.125	300.12	326.987	221.987	243.729	471.922	446.054	281.797	610.221	568.981	435.329	80.9902	104.204	97.3665	121.462	115.233	152.856	124.844	100.504
pgaptmp_001160	pgaptmp_001160	pgaptmp_001160	protein_coding	protein_coding	pgaptmp_001160	0.4769	1407		GO:0015293	GO:0016020	TRUE	0.406689	0.0113014	0.155888	Chromosome_I	1231173	1232579	1407	+	8.95244	859.579	806.187	730.247	520.174	535.943	454.392	736.518	942.574	789.618	381.403	399.107	496.494	375.593	364.059	437.395	345.514	332.876	369.114	383.903	371.463	390.467	25.1739	23.6801	21.6629	19.9168	19.6955	15.8077	24.9242	29.1111
pgaptmp_004624	pgaptmp_004624	pgaptmp_004624	protein_coding	protein_coding	pgaptmp_004624	0.3923	339				TRUE	0.583809	0.0113125	0.155888	Chromosome_II	1532226	1532564	339	-	7.4402	163.436	184.825	158.465	256.884	243.734	171.531	152.204	157.469	192.126	169.512	185.04	148.207	170.858	199.789	158.094	224.163	149.129	150.821	163.731	121.697	160.341	19.8658	22.5321	19.5108	40.8227	37.1759	24.7671	21.3776	20.1852
pgaptmp_002057	pgaptmp_002057	bioD	protein_coding	protein_coding	pgaptmp_002057	0.4664	684	GO:0009102	GO:0000287,GO:0004141,GO:0005524		TRUE	0.533024	0.0114234	0.157004	Chromosome_I	2222016	2222699	684	-	10.2834	7580.48	9970.84	11653.7	11644.3	10424.6	10215.2	10366.9	9221.26	8993.34	102.918	96.1484	101.893	97.2123	71.0359	65.8727	74.1592	94.5369	71.4414	7264.53	8047.3	7247.74	456.666	602.445	711.131	917.113	788.038	731.008	721.65	585.83
pgaptmp_000111	pgaptmp_000111	pgaptmp_000111	protein_coding	protein_coding	pgaptmp_000111	0.4881	795				TRUE	-0.473864	0.0114759	0.157316	Chromosome_I	116286	117080	795	+	10.4712	1204.95	1386.18	1493.17	1677.11	1648.11	1809.32	1236.93	1264.97	1163.31	1093.76	1532.93	1307.93	1035.46	1041.12	1024.98	1321.38	1336.83	1141.74	2519.12	2502.12	2207.39	62.4541	72.0602	78.3939	113.647	107.192	111.399	74.0819	69.1436
pgaptmp_004295	pgaptmp_004295	pgaptmp_004295	protein_coding	protein_coding	pgaptmp_004295	0.4837	3165	GO:0005975			TRUE	0.433935	0.0115299	0.157429	Chromosome_II	1147315	1150479	3165	+	10.1202	825.658	834.351	827.45	1124.91	1293.09	1255.97	1078.79	1278.41	1123.9	1156.32	1498.46	1055.98	1508.26	1156.55	981.503	1496.67	1508.6	1062.36	937.125	893.932	913.86	10.7494	10.8947	10.9121	19.1473	21.1251	19.424	16.2292	17.5523
pgaptmp_000401	pgaptmp_000401	rapA	protein_coding	protein_coding	pgaptmp_000401	0.4918	2910	GO:0006355	GO:0005524,GO:0016817,GO:0140658		TRUE	-0.640828	0.011544	0.157429	Chromosome_I	437772	440681	2910	+	11.7514	2655.83	1994.34	2000.42	1062.13	1400.96	1109.18	1057.26	1626.18	1542.64	8485.7	8680.57	9868.75	15729.2	14847.6	15046.6	5929.36	7140.87	6125.44	1741.25	1507.51	2385.17	37.6067	28.3236	28.6925	19.6629	24.893	18.657	17.299	24.2836
pgaptmp_004302	pgaptmp_004302	pgaptmp_004302	protein_coding	protein_coding	pgaptmp_004302	0.426	669	GO:0008152	GO:0016787		TRUE	0.474327	0.0115779	0.157484	Chromosome_II	1158869	1159537	669	+	9.03062	602.091	759.541	691.039	875.071	798.793	921.98	928.072	841.824	835.363	294.629	313.843	316.793	335.824	296.353	309.602	421.359	339.534	276.505	690.689	614.857	581.547	37.0846	46.9209	43.1139	70.4663	61.738	67.4571	66.0523	54.6805
pgaptmp_001396	pgaptmp_001396	pgaptmp_001396	protein_coding	protein_coding	pgaptmp_001396	0.3736	174				TRUE	0.627991	0.0116093	0.157503	Chromosome_I	1453737	1453910	174	-	4.82206	25.4405	39.6053	31.8564	37.7959	43.6947	49.4801	33.4106	26.8667	33.7805	18.162	10.8847	24.0837	23.5666	23.3087	14.492	42.1359	22.6356	29.1058	30.1757	29.3092	18.2772	6.02468	9.40687	7.64167	11.702	12.9844	13.9192	9.14255	6.7097
pgaptmp_004768	pgaptmp_004768	aroG	protein_coding	protein_coding	pgaptmp_004768	0.452	1053	GO:0009073	GO:0003849		TRUE	0.414152	0.0116965	0.158278	Chromosome_II	1693347	1694399	1053	-	9.77131	704.623	735.778	823.365	1063.41	1030.92	992.901	1213.18	1234.38	1372.33	787.021	747.418	739.184	970.65	977.854	967.011	660.691	636.46	759.396	751.6	783.066	803.366	27.5732	28.8775	32.6366	54.4047	50.6222	46.1541	54.8565	50.9397
pgaptmp_002240	pgaptmp_002240	glgC	protein_coding	protein_coding	pgaptmp_002240	0.4483	1218	GO:0005978	GO:0008878		TRUE	0.447364	0.0117541	0.158327	Chromosome_I	2425994	2427211	1218	-	9.33315	1168.72	973.409	929.554	655.983	774.215	620.151	705.334	838.092	799.471	532.753	585.961	500.2	537.614	500.581	438.712	712.939	581.868	632.389	467.165	494.434	550.808	39.5386	33.0286	31.8543	29.0141	32.8669	24.922	27.5728	29.9008
pgaptmp_004764	pgaptmp_004764	tal	protein_coding	protein_coding	pgaptmp_004764	0.4511	951	GO:0006098	GO:0004801	GO:0005737	TRUE	-0.549336	0.0117602	0.158327	Chromosome_II	1687038	1687988	951	+	13.5064	9375.19	9875.79	9598.58	9813.48	9745.96	9714.6	11854.8	11513.1	11484.7	10362.4	10592.7	10263.4	8133.43	9691.96	9490.94	18672.9	15892.9	24914.5	15177.8	12782	15396.9	406.217	429.174	421.277	555.913	529.893	500.008	593.536	526.079
pgaptmp_004047	pgaptmp_004047	pgaptmp_004047	protein_coding	protein_coding	pgaptmp_004047	0.4331	1443				TRUE	0.618495	0.0118705	0.159326	Chromosome_II	815007	816449	1443	+	7.5341	190.418	274.596	251.584	313.258	362.529	351.309	378.653	284.339	358.214	113.008	114.29	109.303	88.3748	101.004	123.841	144.947	110.515	71.4414	282.199	219.819	166.156	5.43751	7.86448	7.27708	11.695	12.9903	11.9167	12.4942	8.56265
pgaptmp_002140	pgaptmp_002140	pgaptmp_002140	protein_coding	protein_coding	pgaptmp_002140	0.4694	1440	GO:0009401	GO:0008982	GO:0016020	TRUE	0.575512	0.011895	0.159326	Chromosome_I	2325593	2327032	1440	-	8.13232	662.994	629.284	622.425	340.804	336.586	352.133	583.571	524.647	565.119	104.936	114.29	133.387	179.695	120.983	189.713	212.365	195.731	404.835	171.555	266.332	255.05	18.9716	18.0603	18.0412	12.7499	12.0858	11.9695	19.2959	15.8322
pgaptmp_004345	pgaptmp_004345	pgaptmp_004345	protein_coding	protein_coding	pgaptmp_004345	0.439	1959				TRUE	0.503989	0.0119838	0.159467	Chromosome_II	1205212	1207170	1959	+	10.5256	1366.85	1313.13	1230.15	1686.72	1816.06	1317	1348.3	1412	1486.34	1993.79	1770.58	1357.95	1530.36	2163.27	1545.37	2091.63	1452.67	1233.03	1210.94	1027.73	1182.2	28.7504	27.7023	26.2098	46.3846	47.9336	32.9066	32.7707	31.3211
pgaptmp_004878	pgaptmp_004878	pgaptmp_004878	protein_coding	protein_coding	pgaptmp_004878	0.4512	1332				TRUE	-0.470844	0.0120055	0.159467	Chromosome_II	1810983	1812314	1332	-	6.96697	84.0306	106.494	99.6534	160.793	168.634	178.128	161.856	138.065	163.272	94.8462	119.732	100.04	98.6852	94.3446	105.396	60.6757	86.5479	74.0874	267.67	247.854	203.541	2.59951	3.30418	3.12269	6.50319	6.54614	6.54579	5.78571	4.50419
pgaptmp_001764	pgaptmp_001764	pgaptmp_001764	protein_coding	protein_coding	pgaptmp_001764	0.4734	1542	GO:0006355	GO:0005524		TRUE	0.432894	0.0120149	0.159467	Chromosome_I	1860247	1861788	1542	+	6.99028	198.127	194.506	228.713	147.34	159.759	161.635	161.113	158.961	161.161	117.044	99.7767	88.9244	89.8477	118.763	110.666	80.9009	81.2219	76.7334	112.321	105.131	128.771	5.29441	5.21303	6.1908	5.14755	5.35703	5.13079	4.97485	4.47966
pgaptmp_000482	pgaptmp_000482	hemW	protein_coding	protein_coding	pgaptmp_000482	0.4902	1173	GO:0006779	GO:0051539,GO:0051989	GO:0005737	TRUE	-0.437914	0.0120267	0.159467	Chromosome_I	505413	506585	1173	-	10.0775	856.495	758.661	801.311	441.379	549.597	467.587	521.947	562.709	520.078	1943.34	2089.87	2299.07	2685.12	2717.12	3007.75	1958.48	1933.35	2391.96	632.014	659.458	711.149	30.0874	26.7295	28.5131	20.2711	24.2265	19.5118	21.1866	20.846
pgaptmp_003857	pgaptmp_003857	pgaptmp_003857	protein_coding	protein_coding	pgaptmp_003857	0.4233	378		GO:0003677		TRUE	0.49531	0.0120846	0.159832	Chromosome_II	622531	622908	378	-	7.9775	269.052	298.36	301.411	433.692	509.999	408.211	435.08	426.136	458.851	147.314	174.156	161.175	256.287	180.92	205.523	85.9572	125.162	96.5782	270.464	368.277	323.174	29.3294	32.6204	33.2819	61.8093	69.7624	52.8598	54.8037	48.9885
pgaptmp_000478	pgaptmp_000478	mutY	protein_coding	protein_coding	pgaptmp_000478	0.4643	1077	GO:0006281	GO:0019104		TRUE	-0.450908	0.0121529	0.160333	Chromosome_I	501180	502256	1077	-	11.5337	3199.33	2714.28	2937.32	2062.12	1941.68	1789.53	2220.69	2097.84	2471.6	4201.48	3983.81	3914.52	4165.4	4437.53	4547.85	3321.99	3440.61	3218.83	2512.41	2665.87	2834.63	122.406	104.155	113.835	103.148	93.2194	81.331	98.1759	84.6437
pgaptmp_000358	pgaptmp_000358	uvrA	protein_coding	protein_coding	pgaptmp_000358	0.4818	2823	GO:0006289	GO:0003677,GO:0005524,GO:0016887		TRUE	-0.446644	0.0122396	0.160636	Chromosome_I	384521	387343	2823	-	11.8016	5209.9	4773.75	4276.93	1623.3	1709.55	1500.07	1899.95	2262.78	2260.48	5640.32	5340.77	5368.81	7619.38	8362.26	8330.26	4063.59	4569.73	5363.4	2234.68	2031.89	2395.97	76.046	69.8861	63.2356	30.978	31.3124	26.0096	32.0452	34.8312
pgaptmp_004508	pgaptmp_004508	pgaptmp_004508	protein_coding	protein_coding	pgaptmp_004508	0.4646	792				TRUE	0.42062	0.0122565	0.160636	Chromosome_II	1384430	1385221	792	+	7.56454	169.603	191.865	216.46	272.259	294.256	287.809	268.027	228.367	241.39	175.566	177.784	140.797	135.508	143.182	130.428	121.351	126.493	149.498	238.053	200.067	201.88	8.82402	10.0118	11.4076	18.5191	19.2108	17.7874	16.1134	12.5298
pgaptmp_004460	pgaptmp_004460	pgaptmp_004460	protein_coding	protein_coding	pgaptmp_004460	0.4304	381		GO:0004869		TRUE	0.584189	0.0122674	0.160636	Chromosome_II	1327263	1327643	381	+	6.84583	73.2377	79.2105	79.2326	138.371	168.634	210.29	108.399	82.8391	90.0812	119.062	97.9626	105.598	125.198	114.323	140.968	155.06	131.819	115.1	125.173	116.6	100.525	7.92078	8.5921	8.68	19.5653	22.8857	27.0164	13.5467	9.44817
pgaptmp_005275	pgaptmp_005275	pgaptmp_005275	protein_coding	protein_coding	pgaptmp_005275	0.4041	1611				TRUE	0.470179	0.0123612	0.161166	Chromosome_II	2258898	2260508	1611	+	8.45497	538.104	705.854	693.489	914.789	772.167	800.753	1047.61	858.243	954.298	127.134	175.97	135.239	92.7936	107.664	96.1741	180.342	133.151	132.299	663.866	544.132	603.978	13.7635	18.1076	17.9674	30.5907	24.7833	24.3297	30.9625	23.15
pgaptmp_004530	pgaptmp_004530	pgaptmp_004530	protein_coding	protein_coding	pgaptmp_004530	0.4646	1683		GO:0016791		TRUE	0.532519	0.0123691	0.161166	Chromosome_II	1409251	1410933	1683	-	6.39084	77.8632	90.652	78.4158	85.8415	106.506	116.278	126.96	97.765	130.196	80.7201	72.5649	46.3148	85.429	94.3446	80.3647	84.2718	79.8904	51.5966	77.1158	59.2556	73.1088	1.90637	2.22605	1.94473	2.74775	3.27215	3.38179	3.59183	2.52428
pgaptmp_004567	pgaptmp_004567	pgaptmp_004567	protein_coding	protein_coding	pgaptmp_004567	0.5101	1143	GO:0006096			TRUE	0.465177	0.0124705	0.161876	Chromosome_II	1451162	1452304	1143	+	5.59364	24.6695	30.8041	34.3069	69.1857	60.0802	60.2008	66.8212	52.9871	55.597	42.3781	45.353	35.1992	50.0791	51.0571	38.2062	69.1029	54.5917	52.9196	48.6165	45.2382	39.0467	0.88935	1.11379	1.25278	3.26088	2.71787	2.57804	2.78356	2.01447
pgaptmp_003319	pgaptmp_003319	pgaptmp_003319	protein_coding	protein_coding	pgaptmp_003319	0.4722	252				TRUE	0.647353	0.012496	0.161876	Chromosome_II	54959	55210	252	-	6.42608	41.6298	59.8479	60.4455	95.4507	67.5902	112.98	125.475	120.9	113.305	54.4861	76.1931	79.6614	145.818	74.3657	85.6345	102.812	218.367	133.622	50.8517	61.8043	58.9855	6.8071	9.815	10.0116	20.4053	13.8684	21.9448	23.7078	20.848
pgaptmp_001309	pgaptmp_001309	pgaptmp_001309	protein_coding	protein_coding	pgaptmp_001309	0.3356	438				TRUE	0.529727	0.0125159	0.161876	Chromosome_I	1385710	1386147	438	+	9.68663	829.513	1000.69	1007.15	908.383	1019.31	1199.89	1081.76	1064.97	1019.04	823.345	986.882	792.909	677.54	527.22	426.855	920.248	745.643	592.699	816.98	667.741	704.503	78.0382	94.4209	95.9759	111.727	120.331	134.091	117.595	105.657
pgaptmp_004101	pgaptmp_004101	pgaptmp_004101	protein_coding	protein_coding	pgaptmp_004101	0.4638	2307				TRUE	0.469658	0.0126893	0.16332	Chromosome_II	914292	916598	2307	+	6.50709	96.3653	99.4532	111.906	124.278	146.104	132.772	141.067	136.573	131.603	62.5581	56.2378	94.4821	58.9165	68.8161	55.3331	77.53	55.9232	58.2115	112.88	87.9277	87.2321	1.7212	1.78161	2.02463	2.90209	3.2746	2.81702	2.91146	2.57249
pgaptmp_004566	pgaptmp_004566	pgaptmp_004566	protein_coding	protein_coding	pgaptmp_004566	0.5132	984		GO:0016491		TRUE	0.537335	0.0126896	0.16332	Chromosome_II	1450182	1451165	984	+	5.63569	37.7752	45.7661	51.4603	53.1705	67.5902	70.9215	73.5033	78.3613	66.1534	28.252	23.5836	55.5777	48.6062	34.408	60.6029	37.0796	57.2548	52.9196	37.4403	49.6983	39.8775	1.58187	1.92216	2.18282	2.91098	3.55167	3.52789	3.55668	3.46054
pgaptmp_001583	pgaptmp_001583	pgaptmp_001583	protein_coding	protein_coding	pgaptmp_001583	0.4809	1593	GO:0006508	GO:0008236		TRUE	0.47697	0.0127787	0.164066	Chromosome_I	1650233	1651825	1593	+	7.00005	171.916	151.38	197.673	153.746	165.221	148.44	156.658	131.348	147.086	96.8642	116.104	122.271	85.429	112.104	109.349	101.126	127.825	103.193	92.2037	129.343	112.155	4.44691	3.92731	5.17932	5.19939	5.36281	4.56109	4.68243	3.583
pgaptmp_004275	pgaptmp_004275	pgaptmp_004275	protein_coding	protein_coding	pgaptmp_004275	0.4689	1062	GO:0055085	GO:0022857,GO:0042802	GO:0016020	TRUE	-1.08681	0.01285	0.164427	Chromosome_II	1124927	1125988	1062	+	7.48206	184.251	96.8129	121.708	49.9675	77.1484	32.1621	45.2899	105.228	92.8963	643.743	696.623	718.805	592.111	543.869	484.823	237.646	308.909	259.306	78.7922	98.1222	188.587	7.14895	3.76747	4.78338	2.5347	3.75618	1.48236	2.03053	4.3057
pgaptmp_001734	pgaptmp_001734	pgaptmp_001734	protein_coding	protein_coding	pgaptmp_001734	0.4649	699	GO:0055085		GO:0016020	TRUE	0.638759	0.0128692	0.164427	Chromosome_I	1834451	1835149	699	+	9.78855	1264.31	1123.03	1114.16	696.982	979.717	597.885	824.128	1038.85	995.116	1576.06	2004.6	1622.87	1029.57	731.448	778.615	846.089	730.997	642.973	405.137	476.594	581.547	74.5308	66.3981	66.5289	53.7166	72.4715	41.8671	56.1371	64.582
pgaptmp_001744	pgaptmp_001744	pgaptmp_001744	protein_coding	protein_coding	pgaptmp_001744	0.4226	381				TRUE	0.639496	0.0129724	0.164756	Chromosome_I	1842072	1842452	381	-	7.1972	161.123	189.225	173.985	185.136	196.626	281.212	204.176	164.186	154.123	74.6661	85.2637	74.1036	103.104	69.926	92.2218	259.557	250.323	170.666	158.143	147.821	117.971	17.4257	20.5256	19.0602	26.1776	26.6846	36.1278	25.516	18.7261
pgaptmp_001087	pgaptmp_001087	pgaptmp_001087	protein_coding	protein_coding	pgaptmp_001087	0.4328	402				TRUE	0.600187	0.0129883	0.164756	Chromosome_I	1156755	1157156	402	+	8.77648	289.867	330.044	275.272	462.519	460.842	680.352	340.788	332.103	298.394	633.653	642.199	616.913	500.791	345.19	288.522	728.108	656.432	829.514	357.639	367.64	342.282	29.7119	33.9303	28.581	61.9824	59.2748	82.84	40.3637	35.8991
pgaptmp_001553	pgaptmp_001553	citF	protein_coding	protein_coding	pgaptmp_001553	0.4766	1473	GO:0006113	GO:0008814,GO:0008815	GO:0009346	TRUE	0.527025	0.0129889	0.164756	Chromosome_I	1610708	1612180	1473	+	6.42947	94.0526	98.5731	106.188	76.873	89.4376	73.3955	80.1854	94.0335	89.3775	94.8462	59.866	120.418	147.291	113.214	88.2694	53.9339	114.51	108.485	41.9108	61.1671	58.9855	2.63103	2.76565	3.00894	2.81148	3.1395	2.43893	2.59194	2.77407
pgaptmp_001403	pgaptmp_001403	pgaptmp_001403	protein_coding	protein_coding	pgaptmp_001403	0.4567	381				TRUE	0.549948	0.0130546	0.165061	Chromosome_I	1457833	1458213	381	+	6.27446	98.6781	129.377	107.822	102.497	114.699	125.35	137.355	130.602	137.937	64.5761	45.353	51.8725	67.754	63.2664	48.7458	42.1359	37.2822	31.7517	89.4096	80.2818	59.8163	10.6722	14.0338	11.812	14.4928	15.566	16.1039	17.1653	14.8958
pgaptmp_004734	pgaptmp_004734	pgaptmp_004734	protein_coding	protein_coding	pgaptmp_004734	0.4172	477				TRUE	-0.772644	0.0130757	0.165061	Chromosome_II	1651399	1651875	477	-	7.64497	42.4008	32.5643	28.5891	280.587	342.73	173.18	291.043	367.179	382.845	246.196	281.189	416.833	151.71	208.668	255.586	102.812	167.77	179.927	436.99	367.003	579.885	3.6628	2.8214	2.50163	31.6893	37.1516	17.7711	29.0517	33.45
pgaptmp_001648	pgaptmp_001648	pgaptmp_001648	protein_coding	protein_coding	pgaptmp_001648	0.4312	480				TRUE	0.54348	0.0131143	0.165097	Chromosome_I	1721188	1721667	480	-	5.07956	49.3391	78.3304	49.8267	40.3583	55.3011	44.5321	39.3502	44.0316	49.9669	20.18	18.1412	16.6733	27.9854	19.9789	26.3491	25.2815	29.2931	22.4908	29.0581	36.318	24.9234	4.23553	6.7442	4.33273	4.52956	5.95712	4.54114	3.90336	3.98621
pgaptmp_000900	pgaptmp_000900	fliL	protein_coding	protein_coding	pgaptmp_000900	0.485	501	GO:0071973			TRUE	-0.468824	0.0131413	0.165097	Chromosome_I	948497	948997	501	+	10.3105	1965.85	1983.78	2229.95	982.694	1142.21	925.278	1834.61	1836.64	1829.07	891.958	1347.89	1159.72	730.565	882.399	955.154	916.877	1078.52	1104.7	1243.91	1520.89	1503.71	161.686	163.643	185.78	105.668	117.883	90.3998	174.357	159.303
pgaptmp_004478	pgaptmp_004478	tssC	protein_coding	protein_coding	pgaptmp_004478	0.4552	1494	GO:0033103	GO:0003674	GO:0033104	TRUE	0.534641	0.0132012	0.165454	Chromosome_II	1350325	1351818	1494	-	5.84225	48.5681	64.2485	45.7425	89.0446	104.458	76.6942	77.958	109.706	93.6	46.4141	41.7248	42.6096	32.4041	56.6068	46.1109	35.3941	37.2822	35.7207	65.3808	47.7868	68.9549	1.33955	1.77727	1.27794	3.21086	3.61521	2.51272	2.48452	3.19092
pgaptmp_004136	pgaptmp_004136	cqsA	protein_coding	protein_coding	pgaptmp_004136	0.4543	1182		GO:0030170		TRUE	0.730061	0.0132493	0.165664	Chromosome_II	952878	954059	1182	-	8.46062	493.391	410.134	412.5	504.8	545.501	296.881	429.14	581.366	632.68	334.989	353.754	209.343	326.987	322.991	222.65	342.143	328.882	215.647	208.995	287.358	313.205	17.2001	14.34	14.5662	23.0073	23.8628	12.2941	17.2868	21.3732
pgaptmp_002016	pgaptmp_002016	torC	protein_coding	protein_coding	pgaptmp_002016	0.4473	1185		GO:0005506,GO:0009055,GO:0020037	GO:0009276,GO:0016020	TRUE	-0.774099	0.0133549	0.166218	Chromosome_I	2184598	2185782	1185	-	8.97579	1594.27	1431.95	1324.08	623.312	642.448	343.062	980.044	1284.38	1235.8	280.502	286.631	277.889	184.114	190.909	193.666	205.623	198.394	170.666	746.012	892.657	1144.82	55.4372	49.9403	46.6378	28.3368	28.0326	14.1706	39.3786	47.099
pgaptmp_001536	pgaptmp_001536	pgaptmp_001536	protein_coding	protein_coding	pgaptmp_001536	0.4685	429				TRUE	0.531617	0.0133667	0.166218	Chromosome_I	1593059	1593487	429	+	7.66904	373.127	418.056	468.044	294.039	258.754	272.141	324.454	367.925	358.214	117.044	108.847	116.713	167.912	105.444	100.126	160.116	181.085	82.0253	149.202	223.005	199.388	35.8391	40.2734	45.5376	36.9243	31.1871	31.0505	36.0104	37.2683
pgaptmp_000970	pgaptmp_000970	pgaptmp_000970	protein_coding	protein_coding	pgaptmp_000970	0.4383	381				TRUE	-0.429176	0.0133884	0.166218	Chromosome_I	1028402	1028782	381	+	8.68842	371.585	394.292	370.841	254.962	240.321	273.79	399.442	428.375	356.806	409.655	513.396	535.399	331.406	298.573	346.49	810.694	778.931	1353.42	353.168	324.313	378.836	40.1875	42.7696	40.626	36.0508	32.6145	35.1743	49.9185	48.8581
pgaptmp_001302	pgaptmp_001302	pgaptmp_001302	protein_coding	protein_coding	pgaptmp_001302	0.4155	426				TRUE	0.444321	0.0134815	0.166266	Chromosome_I	1382756	1383181	426	+	9.17797	666.848	712.015	763.737	698.263	612.408	659.735	720.184	731.372	769.209	544.861	471.672	411.275	537.614	513.901	432.125	601.7	551.243	508.028	538.693	463.213	458.591	64.5024	69.075	74.8299	88.3027	74.3319	75.8041	80.4945	74.6047
pgaptmp_001015	pgaptmp_001015	sodB	protein_coding	protein_coding	pgaptmp_001015	0.4735	585	GO:0006801	GO:0004784,GO:0046872		TRUE	-0.712706	0.013485	0.166266	Chromosome_I	1076975	1077559	585	-	15.1395	31284	34867.6	44733.7	25995.3	21295	31762.1	36334.4	30999	30039.3	35633.9	35663.8	35853.2	31703	34855.3	39136.3	45670.2	51306.9	45210.5	47893.9	43642.1	40137.5	2203.56	2463.25	3191.69	2393.88	1882.2	2657.58	2957.29	2302.66
pgaptmp_003900	pgaptmp_003900	pgaptmp_003900	protein_coding	protein_coding	pgaptmp_003900	0.4341	1251				TRUE	0.386501	0.013487	0.166266	Chromosome_II	667995	669245	1251	-	7.33358	159.581	159.301	146.213	260.087	290.843	240.803	285.104	242.547	261.095	149.332	146.944	111.155	75.1186	130.972	123.841	82.5863	86.5479	92.6092	198.936	196.882	211.018	5.25632	5.26263	4.8783	11.2002	12.0211	9.42188	10.8512	8.42511
pgaptmp_004698	pgaptmp_004698	pgaptmp_004698	protein_coding	protein_coding	pgaptmp_004698	0.4358	2361				TRUE	0.495265	0.0135997	0.166683	Chromosome_II	1608861	1611221	2361	-	7.27318	164.207	174.263	240.148	269.056	238.955	265.543	277.679	236.576	259.687	98.8822	103.405	109.303	67.754	94.3446	77.7298	96.0698	109.183	117.746	214.024	182.227	152.864	2.86584	3.05036	4.24546	6.13918	5.23317	5.50519	5.59989	4.35425
pgaptmp_004893	pgaptmp_004893	pgaptmp_004893	protein_coding	protein_coding	pgaptmp_004893	0.4464	513	GO:0015031		GO:0005886	TRUE	-0.654356	0.0136015	0.166683	Chromosome_II	1829743	1830255	513	+	7.951	324.558	311.561	334.084	492.628	451.967	294.407	266.542	280.608	259.687	171.53	214.066	179.701	98.6852	129.863	105.396	119.666	111.846	116.423	759.423	532.026	686.225	26.0696	25.0997	27.1818	51.7328	45.5547	28.0907	24.739	23.7695
pgaptmp_004183	pgaptmp_004183	pgaptmp_004183	protein_coding	protein_coding	pgaptmp_004183	0.441	873				TRUE	0.457905	0.0136351	0.166683	Chromosome_II	1023376	1024248	873	+	6.4298	148.017	147.86	142.129	134.528	115.381	141.018	227.192	198.515	229.426	38.3421	34.4683	42.6096	48.6062	65.4862	42.1585	35.3941	45.2712	46.3046	94.9977	86.6534	101.355	6.98644	6.99966	6.79529	8.3016	6.83384	7.90668	12.3911	9.88137
pgaptmp_005167	pgaptmp_005167	pgaptmp_005167	protein_coding	protein_coding	pgaptmp_005167	0.4559	204			GO:0016020	TRUE	0.447984	0.0136594	0.166683	Chromosome_II	2135862	2136065	204	+	3.18207	5.39646	4.40058	4.90099	7.6873	7.51002	6.59735	4.45474	5.22408	3.5188	4.03601	14.513	24.0837	23.5666	24.4186	42.1585	6.74174	15.9781	10.5839	3.35286	2.54863	4.98469	1.09003	0.891501	1.00275	2.03006	1.90351	1.58297	1.03974	1.1128
pgaptmp_000813	pgaptmp_000813	pgaptmp_000813	protein_coding	protein_coding	pgaptmp_000813	0.466	294				TRUE	-0.543429	0.0136792	0.166683	Chromosome_I	858724	859017	294	-	9.15893	682.267	892.439	743.316	832.151	591.926	785.085	1060.23	756	886.033	373.331	342.869	333.466	268.07	356.29	353.078	293.266	298.257	374.406	1161.21	1044.3	1070.88	95.6236	125.451	105.528	152.482	104.103	130.708	171.706	111.741
pgaptmp_001329	pgaptmp_001329	pgaptmp_001329	protein_coding	protein_coding	pgaptmp_001329	0.3829	1191				TRUE	0.576649	0.013747	0.167123	Chromosome_I	1400022	1401212	1191	+	8.49747	520.373	444.459	426.386	440.098	475.862	338.114	437.307	451.51	511.633	359.205	382.78	250.1	393.268	369.609	223.967	389.336	386.137	195.802	240.288	250.403	351.421	18.0037	15.4227	14.9428	19.9068	20.6592	13.8958	17.4827	16.4738
pgaptmp_004652	pgaptmp_004652	modF	protein_coding	protein_coding	pgaptmp_004652	0.4375	1449		GO:0005524		TRUE	0.46405	0.0138201	0.167151	Chromosome_II	1562610	1564058	1449	+	8.66122	615.196	598.479	564.43	784.105	673.854	584.69	893.919	967.202	934.593	215.926	212.252	183.407	209.154	205.338	208.158	239.332	207.715	224.908	473.871	480.417	536.685	17.4946	17.0696	16.2586	29.1521	24.0459	19.751	29.3739	29.0059
pgaptmp_004578	pgaptmp_004578	pgaptmp_004578	protein_coding	protein_coding	pgaptmp_004578	0.446	648				TRUE	0.495341	0.013837	0.167151	Chromosome_II	1467909	1468556	648	-	6.54396	134.911	183.064	241.782	176.808	160.441	218.537	358.607	334.341	308.95	28.252	23.5836	27.7889	26.5124	41.0676	28.984	45.5068	49.2657	41.0127	135.232	127.431	131.263	8.57891	11.6754	15.5736	14.6991	12.8022	16.5076	26.3497	22.4209
pgaptmp_002182	pgaptmp_002182	pgaptmp_002182	protein_coding	protein_coding	pgaptmp_002182	0.4476	429	GO:0030254			TRUE	-0.475697	0.0138635	0.167151	Chromosome_I	2363550	2363978	429	-	9.83869	1236.56	984.851	990.816	657.264	793.332	644.891	532.342	820.181	676.313	1115.96	1376.92	1441.32	633.353	588.266	637.648	1410.71	1310.2	1410.31	1010.33	842.959	1096.63	118.773	94.8757	96.3999	82.5367	95.6184	73.5803	59.0835	83.0788
pgaptmp_002694	pgaptmp_002694	pgaptmp_002694	protein_coding	protein_coding	pgaptmp_002694	0.465	1215	GO:0044571	GO:0030170,GO:0031071		TRUE	-0.83944	0.0138763	0.167151	Chromosome_I	2916776	2917990	1215	-	13.5344	11659.4	7631.49	8017.19	3467.61	4084.09	2254.64	3364.07	6090.54	5559.7	29828.1	29936.6	31955.3	47698.8	56109.5	52648.1	24477.6	27473	27674.3	4688.98	4944.34	8032.83	395.421	259.582	275.415	153.751	173.805	90.8311	131.832	217.83
pgaptmp_002962	pgaptmp_002962	cobA	protein_coding	protein_coding	pgaptmp_002962	0.4806	876	GO:0019354	GO:0004851		TRUE	-0.434654	0.0140155	0.168442	Chromosome_I	3222741	3223616	876	-	7.69605	124.119	80.0906	94.7524	77.5136	76.4657	74.2202	60.8815	84.3317	61.9308	986.804	794.585	920.738	780.644	660.412	737.774	342.143	720.345	361.176	95.5565	101.945	122.125	5.83836	3.7785	4.51468	4.76692	4.51343	4.14716	3.30913	4.18335
pgaptmp_001404	pgaptmp_001404	pgaptmp_001404	protein_coding	protein_coding	pgaptmp_001404	0.3848	369				TRUE	0.778593	0.0141439	0.169273	Chromosome_I	1458342	1458710	369	+	7.36576	148.788	205.947	151.931	193.464	164.538	278.738	216.798	176.126	192.126	193.728	157.829	146.355	163.493	166.49	148.872	173.6	142.471	137.591	154.232	122.971	90.5552	16.615	23.066	17.1854	28.2447	23.056	36.9745	27.9744	20.7413
pgaptmp_002508	pgaptmp_002508	pgaptmp_002508	protein_coding	protein_coding	pgaptmp_002508	0.4756	450				TRUE	-0.516682	0.0141489	0.169273	Chromosome_I	2728203	2728652	450	+	8.65105	521.915	557.994	488.465	529.143	430.12	414.808	469.233	437.331	441.257	258.304	312.029	264.921	229.775	314.112	292.475	239.332	334.208	365.145	622.515	590.008	785.919	47.7909	51.2459	45.3066	63.3468	49.422	45.1199	49.6488	42.2313
pgaptmp_004735	pgaptmp_004735	pgaptmp_004735	protein_coding	protein_coding	pgaptmp_004735	0.442	1371				TRUE	-0.49769	0.0141983	0.169447	Chromosome_II	1651872	1653242	1371	-	9.27054	164.977	168.102	179.703	982.694	923.05	771.065	853.826	1008.99	1024.67	607.419	789.143	1007.81	518.466	456.184	612.616	397.763	438.065	505.382	1327.17	1078.71	1420.64	4.95844	5.06731	5.47089	38.614	34.8122	27.5287	29.6527	31.9808
pgaptmp_000390	pgaptmp_000390	pgaptmp_000390	protein_coding	protein_coding	pgaptmp_000390	0.4392	444				TRUE	-0.512347	0.0142315	0.169447	Chromosome_I	420047	420490	444	+	9.87429	1073.12	858.994	1061.88	876.993	875.942	697.67	985.983	1066.46	1055.64	966.624	917.946	779.941	795.373	1011.15	980.186	743.277	898.766	760.719	984.065	1200.4	1353.34	99.5922	79.9556	99.8236	106.409	102.008	76.913	105.735	104.376
pgaptmp_000502	pgaptmp_000502	pgaptmp_000502	protein_coding	protein_coding	pgaptmp_000502	0.4792	432				TRUE	-0.489545	0.01426	0.169447	Chromosome_I	517124	517555	432	+	7.64987	418.611	266.675	351.237	36.5147	38.9156	28.8634	39.3502	32.0908	25.3353	1015.06	1442.23	1343.13	1087.01	879.07	1030.25	441.584	527.276	549.04	57.5574	43.9639	54.8316	39.9287	25.5118	33.9358	4.55353	4.65783	3.27037	4.33707	3.22801
pgaptmp_004274	pgaptmp_004274	pgaptmp_004274	protein_coding	protein_coding	pgaptmp_004274	0.4711	1074	GO:0055085	GO:0022857,GO:0042802	GO:0016020	TRUE	-0.573129	0.0143339	0.169941	Chromosome_II	1123854	1124927	1074	+	7.94015	164.207	108.254	110.272	87.7634	96.9476	69.2722	58.6541	106.721	101.341	809.219	1095.73	942.969	521.411	617.125	603.394	867.999	916.076	682.662	107.85	119.148	165.326	6.30006	4.16565	4.28551	4.40224	4.66742	3.15709	2.60032	4.31799
pgaptmp_003089	pgaptmp_003089	gmk	protein_coding	protein_coding	pgaptmp_003089	0.4439	624	GO:0006163	GO:0004385		TRUE	-0.557357	0.0143867	0.170184	Chromosome_I	3341537	3342160	624	+	12.5315	4836	4758.79	4545.66	4283.75	4490.99	4520.83	3028.48	3209.83	3277.41	12568.1	12225.4	14587.3	7445.58	9855.12	9779.46	5302.38	5690.86	4216.37	8000.49	5656.68	6148.61	319.345	315.176	304.056	369.831	372.136	354.623	231.086	223.529
pgaptmp_000116	pgaptmp_000116	trmA	protein_coding	protein_coding	pgaptmp_000116	0.4631	1110	GO:0006396	GO:0030697		TRUE	-0.498309	0.014463	0.170325	Chromosome_I	121312	122421	1110	-	11.272	2785.34	2939.59	2734.75	2313.24	2298.75	1711.19	2087.05	2332.93	2166.88	2643.58	2918.92	3280.94	1888.28	2284.25	2272.61	2629.28	2370.08	1997.71	3051.1	2762.71	3204.32	103.398	109.447	102.834	112.269	107.081	75.4584	89.5245	91.3305
pgaptmp_002526	pgaptmp_002526	ispE	protein_coding	protein_coding	pgaptmp_002526	0.4559	873	GO:0016114	GO:0050515		TRUE	-0.576765	0.0144742	0.170325	Chromosome_I	2746096	2746968	873	+	11.8254	4436.66	4369.78	3963.26	4939.09	5138.22	4011.19	3180.69	3458.34	3344.27	3664.69	3176.53	2925.24	2698.38	3853.7	3309.44	1589.37	1665.71	1853.51	8217.3	5745.88	7251.89	209.411	206.865	189.487	304.787	304.328	224.901	173.476	172.144
pgaptmp_002272	pgaptmp_002272	pgaptmp_002272	protein_coding	protein_coding	pgaptmp_002272	0.4517	1935		GO:0004672		TRUE	0.496491	0.0145277	0.170325	Chromosome_I	2465159	2467093	1935	+	8.8923	794.821	862.515	826.633	722.606	697.067	519.541	545.706	620.174	570.045	240.142	279.375	314.94	402.105	370.719	364.935	360.683	403.446	338.685	448.725	513.549	417.883	16.9257	18.4216	17.8309	20.118	18.6268	13.1423	13.428	13.9274
pgaptmp_004373	pgaptmp_004373	pgaptmp_004373	protein_coding	protein_coding	pgaptmp_004373	0.4479	960	GO:0009966	GO:0009975		TRUE	0.450544	0.0145345	0.170325	Chromosome_II	1238223	1239182	960	-	9.21244	763.984	786.824	731.88	956.429	902.568	777.662	1311.92	1342.59	1402.59	425.799	346.497	407.57	341.716	404.017	350.443	353.941	308.909	265.921	572.222	672.201	699.518	32.7923	33.8726	31.8207	53.6717	48.613	39.6509	65.0683	60.7728
pgaptmp_000285	pgaptmp_000285	pgaptmp_000285	protein_coding	protein_coding	pgaptmp_000285	0.4167	228				TRUE	-0.602436	0.0145744	0.170325	Chromosome_I	300356	300583	228	-	10.0555	587.443	699.693	646.93	1146.69	969.476	1294.73	665.984	417.927	526.412	1600.28	1429.53	1409.82	723.201	997.833	974.916	2455.68	1584.49	1397.08	2137.45	1623.48	1504.55	106.167	126.828	118.43	270.941	219.86	277.957	139.079	79.6531
pgaptmp_001577	pgaptmp_001577	pgaptmp_001577	protein_coding	protein_coding	pgaptmp_001577	0.4859	1665				TRUE	0.465403	0.0145959	0.170325	Chromosome_I	1642048	1643712	1665	+	9.57216	820.262	752.5	805.395	547.72	641.766	724.884	654.847	641.07	656.608	1134.12	1282.58	1189.36	1119.41	813.583	839.218	896.652	858.821	875.819	467.165	463.851	467.73	20.3	18.6781	20.19	17.7218	19.9299	21.3102	18.7266	16.7313
pgaptmp_003805	pgaptmp_003805	pgaptmp_003805	protein_coding	protein_coding	pgaptmp_003805	0.4486	564				TRUE	0.4604	0.0146252	0.170325	Chromosome_II	559860	560423	564	-	6.33927	84.0306	87.1316	84.1336	131.965	143.373	99.7849	112.854	101.497	114.713	86.7742	81.6355	48.1674	33.877	49.9471	46.1109	52.2485	85.2164	68.7954	91.6449	93.6621	83.9089	6.13927	6.38466	6.22632	12.6051	13.1442	8.66001	9.52728	7.82005
pgaptmp_003690	pgaptmp_003690	pgaptmp_003690	protein_coding	protein_coding	pgaptmp_003690	0.4692	552				TRUE	-0.465145	0.0147769	0.171494	Chromosome_II	448169	448720	552	-	7.87887	214.317	205.067	196.856	338.241	279.919	268.842	306.635	356.73	359.621	181.62	186.855	222.311	144.346	102.114	159.412	146.633	195.731	186.541	374.962	402.683	469.392	15.9983	15.3532	14.8851	33.0105	26.2203	23.8391	26.4494	28.0827
pgaptmp_004256	pgaptmp_004256	pgaptmp_004256	protein_coding	protein_coding	pgaptmp_004256	0.4362	894	GO:0006355	GO:0003677,GO:0003700		TRUE	0.422334	0.0148191	0.171494	Chromosome_II	1105067	1105960	894	-	7.9689	326.1	363.488	318.564	520.815	544.135	418.107	557.585	511.214	487.002	145.296	90.7061	138.944	145.818	156.501	133.063	124.722	90.5424	108.485	349.815	380.383	381.329	15.0304	16.8033	14.8731	31.3841	31.4712	22.8919	29.6966	24.8486
pgaptmp_001170	pgaptmp_001170	pgaptmp_001170	protein_coding	protein_coding	pgaptmp_001170	0.4279	201				TRUE	0.885171	0.014836	0.171494	Chromosome_I	1247885	1248085	201	+	8.43883	540.417	601.12	697.574	438.176	505.22	822.195	836.007	644.801	537.672	226.016	239.464	285.299	142.873	128.753	168.634	286.524	214.372	194.479	376.079	364.454	220.988	110.788	123.597	144.855	117.44	129.966	200.222	198.037	139.401
pgaptmp_005281	pgaptmp_005281	pgaptmp_005281	protein_coding	protein_coding	pgaptmp_005281	0.4463	726				TRUE	0.513517	0.0148559	0.171494	Chromosome_II	2263276	2264001	726	-	10.0351	1416.96	1467.15	1599.35	3598.94	3401.36	2738.72	4081.29	4228.52	4275.34	173.548	319.285	192.669	328.46	188.689	233.189	480.349	466.027	783.21	2026.8	2600.24	2252.25	80.4226	83.5182	91.9494	267.056	242.248	184.648	267.666	253.099
pgaptmp_004257	pgaptmp_004257	accD	protein_coding	protein_coding	pgaptmp_004257	0.4586	870	GO:0006633	GO:0003989	GO:0009317	TRUE	0.447502	0.0149263	0.17193	Chromosome_II	1106070	1106939	870	+	6.83694	85.5724	110.895	111.906	153.105	151.566	118.752	147.007	135.826	135.826	106.954	117.918	135.239	126.671	98.7843	79.0472	111.239	97.1999	88.6403	90.5272	108.954	108.832	4.05296	5.26785	5.36876	9.4806	9.00796	6.68122	8.04545	6.78425
pgaptmp_000053	pgaptmp_000053	gppA	protein_coding	protein_coding	pgaptmp_000053	0.494	1494	GO:0015974	GO:0008894		TRUE	-0.452817	0.014974	0.172103	Chromosome_I	58122	59615	1494	-	12.5844	4527.63	4186.72	4696.78	2276.72	2644.21	2630.69	3705.6	4388.23	4125.44	11294.8	12063.9	13021.9	18336.3	14661.1	16098	9111.46	10951.6	11622.5	3311.51	3462.95	3689.5	124.876	115.815	131.217	82.0963	91.5144	86.1891	118.098	127.637
pgaptmp_002902	pgaptmp_002902	pgaptmp_002902	protein_coding	protein_coding	pgaptmp_002902	0.4344	762		GO:0003700		TRUE	-0.666487	0.0150623	0.172741	Chromosome_I	3155681	3156442	762	-	12.2509	5506.7	4851.2	3836.65	3469.54	3493.53	2985.3	1882.87	3088.18	2856.56	6344.6	8308.68	7786.44	4012.22	3807.08	3607.19	11206.5	8982.34	14267.1	5005.26	3955.47	7008.47	297.779	263.109	210.154	245.29	237.057	191.763	117.652	176.11
pgaptmp_001378	pgaptmp_001378	pgaptmp_001378	protein_coding	protein_coding	pgaptmp_001378	0.3798	1314				TRUE	0.416465	0.0151585	0.173466	Chromosome_I	1440520	1441833	1314	+	8.64828	529.624	534.231	562.796	545.798	508.633	559.125	490.022	489.571	508.114	304.719	263.048	274.183	324.041	286.364	259.538	404.505	340.866	302.964	438.107	402.683	378.006	16.6085	16.8026	17.8771	22.377	20.0149	20.828	17.7563	16.1904
pgaptmp_000770	pgaptmp_000770	csdA	protein_coding	protein_coding	pgaptmp_000770	0.4909	1212	GO:0016226	GO:0031071		TRUE	-0.531938	0.0152054	0.173534	Chromosome_I	816286	817497	1212	-	9.68555	1051.54	946.126	875.643	525.299	590.561	390.893	576.889	695.55	680.535	1218.87	1139.27	1211.59	1106.16	1108.83	1060.55	760.131	925.397	951.229	655.484	702.785	846.566	35.7504	32.2617	30.1554	23.349	25.1945	15.7866	22.6633	24.9381
pgaptmp_001854	pgaptmp_001854	pgaptmp_001854	protein_coding	protein_coding	pgaptmp_001854	0.4326	141				TRUE	-0.674342	0.0152304	0.173534	Chromosome_I	1983543	1983683	141	-	10.4187	973.675	1008.61	864.207	1220.36	869.797	1392.87	991.181	877.646	926.148	2246.04	1688.95	2058.23	1181.28	1511.73	1529.56	1786.56	1663.05	1709.3	1840.16	1603.09	2223.17	284.547	295.629	255.823	466.265	318.965	483.529	334.708	270.482
pgaptmp_003109	pgaptmp_003109	gspL	protein_coding	protein_coding	pgaptmp_003109	0.4846	1203	GO:0015628		GO:0009276,GO:0015627	TRUE	-0.536193	0.0152886	0.173822	Chromosome_I	3365315	3366517	1203	-	10.2654	1177.97	1062.3	1146.83	751.434	792.649	655.612	864.963	1030.64	965.558	1618.44	1578.29	1852.59	1905.95	2005.65	1978.82	1255.65	1476.64	2008.3	910.302	978.037	1343.37	40.3484	36.4942	39.7901	33.6503	34.069	26.6756	34.2345	37.2287
pgaptmp_000080	pgaptmp_000080	pgaptmp_000080	protein_coding	protein_coding	pgaptmp_000080	0.4891	597	GO:0006400	GO:0016432		TRUE	-0.406762	0.0154127	0.174775	Chromosome_I	88412	89008	597	-	7.70744	153.414	137.298	142.945	105.7	92.1685	93.1876	66.0787	108.213	111.898	393.511	241.278	339.024	462.495	633.774	590.219	515.743	529.939	604.606	129.644	124.883	142.894	10.5888	9.50456	9.99394	9.5382	7.98274	7.6404	5.27011	7.87668
pgaptmp_002754	pgaptmp_002754	pgaptmp_002754	protein_coding	protein_coding	pgaptmp_002754	0.4843	1113	GO:0006040,GO:0009254	GO:0005524,GO:0016773		TRUE	-0.452414	0.0154574	0.174775	Chromosome_I	2982154	2983266	1113	+	9.84526	1352.97	1174.96	1282.42	676.483	753.051	601.183	1190.9	1251.54	1142.2	611.455	691.18	622.471	858.709	873.52	932.757	1066.88	938.712	1062.36	828.157	927.701	1056.75	50.09	43.6283	48.0925	32.7435	34.9843	26.439	50.9464	48.8638
pgaptmp_000590	pgaptmp_000590	pgaptmp_000590	protein_coding	protein_coding	pgaptmp_000590	0.4797	246				TRUE	0.545002	0.0154767	0.174775	Chromosome_I	593839	594084	246	+	8.79358	594.381	667.129	699.207	639.968	591.244	648.19	619.952	554.499	620.716	221.98	232.208	242.689	281.327	310.782	280.618	564.621	439.397	433.94	449.283	513.549	333.974	99.5608	112.077	118.635	140.148	124.273	128.973	119.993	97.9497
pgaptmp_001900	pgaptmp_001900	pgaptmp_001900	protein_coding	protein_coding	pgaptmp_001900	0.4241	474	GO:0000160			TRUE	0.709077	0.0155331	0.174775	Chromosome_I	2043046	2043519	474	-	7.42156	461.012	426.857	378.193	356.178	398.031	187.2	253.92	309.714	316.692	96.8642	65.3084	100.04	69.2269	69.926	93.5392	75.8446	99.8629	96.5782	179.937	198.156	192.741	40.0767	37.2173	33.3024	40.4812	43.4193	19.3312	25.5066	28.3935
pgaptmp_003995	pgaptmp_003995	pgaptmp_003995	protein_coding	protein_coding	pgaptmp_003995	0.4314	204				TRUE	-0.412447	0.0155566	0.174775	Chromosome_II	764839	765042	204	+	9.21639	549.668	531.591	480.297	666.874	609.677	611.079	847.886	703.013	772.024	641.725	687.552	566.893	424.199	456.184	422.903	519.114	406.109	418.065	895.773	776.695	876.474	111.027	107.693	98.2698	176.107	154.53	146.622	197.897	149.751
pgaptmp_002801	pgaptmp_002801	thrA	protein_coding	protein_coding	pgaptmp_002801	0.4732	2460	GO:0008652,GO:0009067	GO:0004072,GO:0004412,GO:0050661		TRUE	-0.780478	0.0155717	0.174775	Chromosome_I	3033622	3036081	2460	-	11.5714	4259.35	3079.53	2809.9	1812.92	2218.19	1300.5	2618.65	4918.85	3938.94	2540.67	2391.01	2395.4	4228.74	4479.7	4182.92	3633.8	3571.1	3624.99	2149.74	3063.45	4016.83	71.3454	51.7358	47.6756	39.7016	46.6237	25.8767	50.6844	86.8892
pgaptmp_001357	pgaptmp_001357	pgaptmp_001357	protein_coding	protein_coding	pgaptmp_001357	0.4235	510				TRUE	0.444117	0.0156837	0.174811	Chromosome_I	1426355	1426864	510	-	6.61785	129.515	129.377	115.99	133.247	144.056	108.032	101.717	91.0483	100.638	72.6481	78.0072	51.8725	92.7936	118.763	92.2218	99.4407	86.5479	70.1184	84.3803	91.7507	104.678	10.4643	10.4841	9.49273	14.0751	14.6051	10.3684	9.4963	7.75781
pgaptmp_001891	pgaptmp_001891	pgaptmp_001891	protein_coding	protein_coding	pgaptmp_001891	0.4579	1260				TRUE	0.42397	0.0156908	0.174811	Chromosome_I	2031773	2033032	1260	+	9.19091	881.936	914.441	939.355	1093.52	992.006	867.551	1095.12	938.843	1042.97	318.845	286.631	196.375	176.75	237.526	209.475	812.38	653.769	467.015	765.57	744.2	708.657	28.8419	29.9935	31.1172	46.7541	40.7087	33.7021	41.3834	32.3787
pgaptmp_001851	pgaptmp_001851	pgaptmp_001851	protein_coding	protein_coding	pgaptmp_001851	0.4314	408				TRUE	0.422812	0.0157305	0.174811	Chromosome_I	1981844	1982251	408	+	6.99073	191.96	227.95	205.841	155.027	156.345	153.388	193.781	184.336	187.904	88.7922	67.1225	96.3347	92.7936	82.1353	65.8727	106.182	117.173	108.485	125.173	121.697	98.0322	19.3869	23.0899	21.0578	20.4697	19.8138	18.402	22.6144	19.633
pgaptmp_001297	pgaptmp_001297	pgaptmp_001297	protein_coding	protein_coding	pgaptmp_001297	0.398	294				TRUE	0.459254	0.0157349	0.174811	Chromosome_I	1380602	1380895	294	+	6.9767	198.898	219.149	243.416	169.121	159.076	185.55	195.266	158.215	185.089	96.8642	87.0778	66.6933	81.0103	78.8055	56.6505	101.126	105.189	85.9943	139.703	125.52	107.171	27.8767	30.8059	34.5575	30.9894	27.977	30.8921	31.6237	23.385
pgaptmp_001091	pgaptmp_001091	pgaptmp_001091	protein_coding	protein_coding	pgaptmp_001091	0.4301	93				TRUE	0.541712	0.015741	0.174811	Chromosome_I	1159977	1160069	93	+	4.86381	34.6915	39.6053	49.8267	37.7959	36.1847	36.2854	40.8352	32.8371	38.003	18.162	10.8847	24.0837	22.0937	15.5391	28.984	28.6524	22.6356	39.6897	17.8819	29.9464	22.4311	15.3709	17.6	22.3625	21.894	20.118	19.0977	20.9066	15.3433
pgaptmp_004668	pgaptmp_004668	vctG	protein_coding	protein_coding	pgaptmp_004668	0.4238	951				TRUE	0.444319	0.0158279	0.175361	Chromosome_II	1582718	1583668	951	-	7.24279	77.0923	100.333	98.0197	308.773	302.449	342.237	123.248	117.169	135.122	125.116	148.758	105.598	138.454	114.323	98.809	138.206	122.499	168.02	253.141	247.854	202.711	3.34032	4.3602	4.30203	17.4914	16.4443	17.6149	6.17066	5.35388
pgaptmp_003502	pgaptmp_003502	pgaptmp_003502	protein_coding	protein_coding	pgaptmp_003502	0.405	642	GO:0034194	GO:0008674		TRUE	-0.486404	0.0158571	0.175361	Chromosome_II	252493	253134	642	+	6.81723	110.242	102.974	120.891	128.762	102.409	85.7655	133.642	124.632	133.714	60.5401	81.6355	111.155	81.0103	86.575	96.1741	109.553	117.173	177.281	162.055	147.183	147.879	7.07571	6.62877	7.85959	10.8048	8.248	6.53899	9.91155	8.43589
pgaptmp_004397	pgaptmp_004397	uhpT	protein_coding	protein_coding	pgaptmp_004397	0.4549	1398	GO:0055085	GO:0022857		TRUE	0.428213	0.016015	0.176459	Chromosome_II	1262262	1263659	1398	+	5.87762	60.132	85.3713	57.1782	98.6537	87.3894	82.4669	101.717	79.8539	79.5248	26.234	38.0966	51.8725	35.3499	37.7378	50.0632	40.4505	43.9397	42.3356	69.2925	68.813	58.1547	1.77238	2.52375	1.70712	3.80164	3.23218	2.88739	3.46432	2.48214
pgaptmp_001852	pgaptmp_001852	pgaptmp_001852	protein_coding	protein_coding	pgaptmp_001852	0.4574	516				TRUE	0.573913	0.01609	0.176459	Chromosome_I	1982343	1982858	516	-	7.11475	148.017	165.462	178.886	163.355	167.951	241.628	153.689	132.095	127.38	131.17	156.014	116.713	128.143	114.323	130.428	107.868	101.194	104.516	127.409	114.688	142.064	11.8201	13.2523	14.47	17.0548	16.8298	22.9208	14.1816	11.1243
pgaptmp_003588	pgaptmp_003588	pgaptmp_003588	protein_coding	protein_coding		0.5	1000				TRUE	1.17692	0.0161106	0.176459	pgaptmp_003588	1	1000	1000	+	4.88747	7.70923	4.40058	16.3366	105.7	34.8192	53.6035	93.5496	29.8519	28.1504	125.116	41.7248	59.2829	7.36457	23.3087	22.3967	40.4505	15.9781	33.0747	31.8522	12.7431	31.5697	0.317665	0.181866	0.681872	5.69431	1.80037	2.62377	4.45425	1.29721
pgaptmp_001818	pgaptmp_001818	pgaptmp_001818	protein_coding	protein_coding	pgaptmp_001818	0.4386	399		GO:0046872		TRUE	0.504413	0.0161153	0.176459	Chromosome_I	1947287	1947685	399	-	8.24406	1177.97	1300.81	1360.02	945.538	758.512	1038.26	1579.21	980.635	1182.32	48.4321	43.5389	44.4622	50.0791	58.8266	46.1109	101.126	125.162	87.3173	680.631	649.9	625.578	121.652	134.736	142.27	127.665	98.2955	127.369	188.451	106.8
pgaptmp_004699	pgaptmp_004699	pgaptmp_004699	protein_coding	protein_coding	pgaptmp_004699	0.4427	978		GO:0016491		TRUE	0.586188	0.0161269	0.176459	Chromosome_II	1611214	1612191	978	-	6.14729	65.5284	115.295	114.356	138.371	148.835	123.7	144.037	123.139	136.529	46.4141	39.9107	31.494	26.5124	31.0782	43.476	52.2485	39.9452	33.0747	105.615	100.671	62.3086	2.76089	4.87208	4.88048	7.62205	7.86883	6.19105	7.01241	5.47135
pgaptmp_001246	pgaptmp_001246	pgaptmp_001246	protein_coding	protein_coding	pgaptmp_001246	0.439	1467				TRUE	-0.403933	0.0161575	0.176459	Chromosome_I	1331391	1332857	1467	-	9.01749	603.633	590.558	556.262	423.442	393.935	406.562	426.913	421.658	441.257	676.031	660.34	620.618	356.445	568.287	573.092	601.7	511.298	560.947	600.162	530.752	514.254	16.9551	16.637	15.8267	15.5499	13.8848	13.5653	13.8561	12.4902
pgaptmp_004000	pgaptmp_004000	pgaptmp_004000	protein_coding	protein_coding	pgaptmp_004000	0.4284	663		GO:0035438		TRUE	0.563237	0.016208	0.176644	Chromosome_II	770206	770868	663	-	8.75179	331.497	444.459	456.608	637.406	584.416	833.74	642.968	500.02	551.044	339.025	373.709	385.339	387.376	376.268	342.538	342.143	258.312	248.722	517.458	478.505	409.575	20.6027	27.7051	28.7456	51.7925	45.5777	61.5531	46.1752	32.7726
pgaptmp_002734	pgaptmp_002734	pgaptmp_002734	protein_coding	protein_coding		0.5	1000				TRUE	-1.02479	0.0163459	0.17747	pgaptmp_002734	1	1000	1000	+	13.0215	5699.43	3956.13	3817.05	2681.59	4223.36	2613.37	14413.3	3826.27	2674.29	30320.5	5750.77	20341.4	6619.27	19543.8	25388.7	25632.1	24397.2	34743	6707.4	3473.14	9337.15	234.85	163.498	159.319	144.463	218.375	127.919	686.273	166.27
pgaptmp_001747	pgaptmp_001747	pgaptmp_001747	protein_coding	protein_coding	pgaptmp_001747	0.4388	417		GO:0016787		TRUE	0.571778	0.0163512	0.17747	Chromosome_I	1843516	1843932	417	-	5.87323	222.026	153.14	195.223	125.559	90.1203	79.9929	152.946	126.124	152.012	20.18	14.513	12.9681	35.3499	27.7484	26.3491	18.5398	33.2876	27.7828	55.3222	64.99	74.7703	21.9394	15.1773	19.5405	16.221	11.1746	9.38962	17.4637	13.1432
pgaptmp_001515	pgaptmp_001515	pgaptmp_001515	protein_coding	protein_coding	pgaptmp_001515	0.4899	3711				TRUE	0.52796	0.0164351	0.178014	Chromosome_I	1569540	1573250	3711	-	7.38462	339.977	289.558	316.114	153.105	152.931	196.271	164.083	172.395	162.568	133.188	145.13	157.47	134.035	133.192	155.46	176.971	137.145	209.032	136.35	110.228	99.6938	3.775	3.22468	3.55544	2.22261	2.13083	2.5888	2.10526	2.01869
pgaptmp_004035	pgaptmp_004035	pgaptmp_004035	protein_coding	protein_coding	pgaptmp_004035	0.4299	663	GO:0061077			TRUE	0.595071	0.0164884	0.17816	Chromosome_II	804685	805347	663	+	4.49623	15.4185	29.0439	25.3218	30.7492	38.2328	30.5127	33.4106	34.3297	25.3353	14.126	19.9553	18.5259	10.3104	12.2093	21.0793	25.2815	26.6301	11.9069	13.4114	21.0262	25.7542	0.958265	1.81043	1.59412	2.49853	2.98172	2.25268	2.3994	2.25006
pgaptmp_000362	pgaptmp_000362	pgaptmp_000362	protein_coding	protein_coding	pgaptmp_000362	0.4172	1419				TRUE	-0.438218	0.0165163	0.17816	Chromosome_I	390072	391490	1419	+	10.1915	1093.17	924.123	985.098	593.204	654.737	489.028	718.699	796.3	807.212	1701.18	1792.35	1945.22	1633.46	2105.55	2067.09	2447.25	2348.78	2491.19	728.13	798.358	854.874	31.7441	26.9147	28.976	22.5209	23.8577	16.8688	24.1156	24.3855
pgaptmp_000134	pgaptmp_000134	pgaptmp_000134	protein_coding	protein_coding	pgaptmp_000134	0.412	432		GO:0008080,GO:0016746		TRUE	-0.445946	0.0166101	0.178663	Chromosome_I	140502	140933	432	-	9.53074	867.288	861.634	841.336	690.576	632.89	512.119	655.59	650.772	648.163	554.951	651.27	618.765	673.122	804.704	815.504	937.102	894.772	894.341	834.304	795.172	903.059	82.7252	82.4292	81.288	86.1176	75.751	58.0257	72.2572	65.461
pgaptmp_004774	pgaptmp_004774	pgaptmp_004774	protein_coding	protein_coding	pgaptmp_004774	0.4684	237				TRUE	0.448599	0.0166309	0.178663	Chromosome_II	1699619	1699855	237	+	4.70557	17.7312	37.845	17.9703	42.9208	45.0601	44.5321	51.972	49.2557	44.3368	14.126	14.513	12.9681	14.7291	21.0888	13.1745	18.5398	14.6466	22.4908	35.7639	29.9464	26.585	3.08282	6.59936	3.16481	9.75626	9.83078	9.19724	10.4413	9.03119
pgaptmp_002652	pgaptmp_002652	pgaptmp_002652	protein_coding	protein_coding	pgaptmp_002652	0.4875	2043				TRUE	-0.459278	0.0167394	0.179212	Chromosome_I	2869815	2871857	2043	+	10.266	2762.99	2745.08	3063.93	1679.04	1716.38	1454.72	2347.65	2431.44	2457.53	556.969	569.634	518.725	539.086	548.309	525.664	532.598	585.863	635.035	1929.57	2448.6	2363.57	55.7274	55.5302	62.5967	44.2747	43.44	34.8532	54.7139	51.7169
pgaptmp_001901	pgaptmp_001901	pgaptmp_001901	protein_coding	protein_coding	pgaptmp_001901	0.4723	1338				TRUE	1.00452	0.0167501	0.179212	Chromosome_I	2043506	2044843	1338	-	7.60359	1085.46	778.903	631.41	509.284	602.85	276.264	455.869	866.452	778.358	60.5401	48.9813	51.8725	54.4978	88.7949	79.0472	30.3378	62.5808	62.1805	134.673	229.377	322.343	33.4284	24.0585	19.6968	20.5054	23.2968	10.1065	16.2225	28.1401
pgaptmp_005175	pgaptmp_005175	pgaptmp_005175	protein_coding	protein_coding	pgaptmp_005175	0.457	453				TRUE	0.483165	0.016804	0.179425	Chromosome_II	2142237	2142689	453	+	5.66282	42.4008	44.0058	41.6584	62.7796	64.1766	43.7074	69.791	62.689	66.8572	54.4861	45.353	35.1992	63.3353	64.3763	63.2378	35.3941	46.6027	46.3046	41.9108	35.6808	39.8775	3.85686	4.01471	3.83835	7.46595	7.32525	4.72269	7.33557	6.01355
pgaptmp_002796	pgaptmp_002796	nfo	protein_coding	protein_coding	pgaptmp_002796	0.4572	888	GO:0006281	GO:0003677,GO:0008270		TRUE	-0.455912	0.0168558	0.179533	Chromosome_I	3028865	3029752	888	-	12.0622	3534.68	3703.53	3704.33	2987.8	3399.31	3136.21	3308.39	3211.32	3395.64	5779.56	6316.77	6135.78	6660.52	5426.48	6155.14	4318.09	4520.46	3885.62	3968.67	4379.82	4863.39	164.019	172.363	174.115	181.26	197.935	172.872	177.393	157.148
pgaptmp_001833	pgaptmp_001833	pgaptmp_001833	protein_coding	protein_coding	pgaptmp_001833	0.4353	873				TRUE	0.498545	0.0168824	0.179533	Chromosome_I	1964545	1965417	873	+	6.26808	77.8632	108.254	156.832	108.903	110.602	131.947	110.626	97.0187	90.785	70.6301	74.379	62.9881	58.9165	52.167	38.2062	30.3378	39.9452	60.8575	96.1153	80.2818	68.9549	3.67516	5.12475	7.49825	6.72035	6.55078	7.39806	6.0336	4.82924
pgaptmp_001210	pgaptmp_001210	nrdB	protein_coding	protein_coding	pgaptmp_001210	0.4356	1134	GO:0009263	GO:0016491		TRUE	-0.606881	0.0170148	0.180577	Chromosome_I	1289132	1290265	1134	-	13.3581	8485.55	8574.1	7116.23	5556	5896.05	3988.1	6158.68	7671.2	7146.68	12741.7	10240.7	11971.4	22628.4	29336.7	26009.2	21696.6	21044.5	20621.4	7541.7	6727.11	9440.17	308.337	312.476	261.926	263.945	268.839	172.141	258.588	293.959
pgaptmp_004393	pgaptmp_004393	pgaptmp_004393	protein_coding	protein_coding	pgaptmp_004393	0.454	1227	GO:0008643	GO:0015288	GO:0016020	TRUE	0.437222	0.0171235	0.181364	Chromosome_II	1257194	1258420	1227	-	8.23691	196.585	234.111	214.827	277.384	329.076	327.393	320.742	343.297	293.468	296.647	324.728	385.339	430.091	264.165	283.253	416.303	342.197	558.301	253.7	237.66	200.218	6.60184	7.88532	7.30776	12.1787	13.8674	13.0605	12.4464	12.158
pgaptmp_002170	pgaptmp_002170	pgaptmp_002170	protein_coding	protein_coding	pgaptmp_002170	0.4907	2892			GO:0005576	TRUE	-0.501338	0.0172233	0.182055	Chromosome_I	2353037	2355928	2892	-	9.47794	919.711	710.254	802.128	388.849	449.919	355.432	559.813	703.013	762.172	954.516	1560.14	1206.04	711.417	594.926	636.33	839.347	924.065	1209.21	475.547	545.407	694.533	13.1042	10.1498	11.5767	7.24348	8.04414	6.01577	9.21674	10.5634
pgaptmp_001408	pgaptmp_001408	pgaptmp_001408	protein_coding	protein_coding	pgaptmp_001408	0.4222	180				TRUE	0.495892	0.0173662	0.183198	Chromosome_I	1461150	1461329	180	+	8.12062	268.281	325.643	390.445	491.347	457.429	538.509	443.989	360.462	416.626	177.584	183.226	211.195	198.843	207.558	200.253	114.61	193.068	133.622	422.46	336.419	303.235	61.4152	74.7672	90.5375	147.055	131.4	146.438	117.445	87.021
pgaptmp_003577	pgaptmp_003577	thiD	protein_coding	protein_coding	pgaptmp_003577	0.4845	873	GO:0009228	GO:0008902,GO:0008972		TRUE	-0.384206	0.0174351	0.183466	Chromosome_II	329373	330245	873	-	6.52881	57.8192	51.9269	67.797	115.95	126.988	101.434	103.944	87.3168	101.341	82.7381	68.9366	64.8407	89.8477	122.093	98.809	70.7883	81.2219	63.5035	144.732	153.555	162.002	2.72908	2.45821	3.24143	7.15519	7.52127	5.68726	5.66915	4.34632
pgaptmp_001394	pgaptmp_001394	pgaptmp_001394	protein_coding	protein_coding	pgaptmp_001394	0.3815	498				TRUE	0.574528	0.0174613	0.183466	Chromosome_I	1452306	1452803	498	+	6.54955	100.991	124.977	98.8365	129.403	117.429	134.421	113.596	110.452	121.047	80.7201	76.1931	81.514	106.05	92.1247	54.0156	91.0135	70.5698	55.5655	100.027	91.7507	59.8163	8.35624	10.3715	8.28379	13.9984	12.1925	13.2121	10.8609	9.63789
pgaptmp_004623	pgaptmp_004623	pgaptmp_004623	protein_coding	protein_coding	pgaptmp_004623	0.4249	2937				TRUE	0.492601	0.0175212	0.183728	Chromosome_II	1529277	1532213	2937	-	10.1993	1241.19	1333.38	1083.93	1348.48	1416.66	966.512	1183.48	1360.5	1385.7	1321.79	1500.28	1343.13	1154.76	1397.41	1050.01	1196.66	1114.47	947.26	890.185	817.473	959.553	17.4137	18.7625	15.4042	24.7346	24.9406	16.1078	19.1862	20.1295
pgaptmp_001799	pgaptmp_001799	pgaptmp_001799	protein_coding	protein_coding	pgaptmp_001799	0.4633	1470				TRUE	0.41029	0.017672	0.184941	Chromosome_I	1922416	1923885	1470	+	7.64167	474.888	639.845	666.534	309.414	288.795	303.478	325.196	279.115	299.098	72.6481	78.0072	64.8407	123.725	130.972	126.476	143.262	113.178	84.6713	225.759	253.589	201.88	13.3117	17.9887	18.9254	11.3393	10.1582	10.1051	10.5332	8.25095
pgaptmp_003151	pgaptmp_003151	rmuC	protein_coding	protein_coding	pgaptmp_003151	0.4866	1533				TRUE	-0.572996	0.0177885	0.185178	Chromosome_I	3413613	3415145	1533	-	10.0607	2423.78	1921.3	1982.45	689.935	688.191	490.678	1097.35	1198.55	1304.07	1438.84	1298.91	1250.5	995.69	1271.99	1028.93	659.005	837.517	795.116	778.423	874.18	1162.26	65.1493	51.7957	53.976	24.2455	23.2119	15.667	34.0829	33.9745
pgaptmp_003842	pgaptmp_003842	pgaptmp_003842	protein_coding	protein_coding	pgaptmp_003842	0.4861	1257	GO:0006164	GO:0004019,GO:0005525		TRUE	-0.624906	0.0178218	0.185178	Chromosome_II	610000	611256	1257	-	12.2172	2950.32	2713.4	2751.9	3247.89	3366.54	2683.47	4624.02	5267.37	4968.54	5452.65	6982.55	8232.91	6871.14	6357.72	8869.1	4769.78	6266.07	5708.7	3481.95	5108.09	5894.39	96.7146	89.2114	91.3774	139.197	138.482	104.495	175.153	182.094
pgaptmp_004514	pgaptmp_004514	pgaptmp_004514	protein_coding	protein_coding	pgaptmp_004514	0.4264	333				TRUE	0.448119	0.0178348	0.185178	Chromosome_II	1390529	1390861	333	-	6.06112	67.0703	49.2865	58.8118	71.7482	83.9757	72.5708	69.791	75.3761	100.638	90.8102	81.6355	42.6096	48.6062	69.926	64.5552	60.6757	79.8904	62.1805	51.4105	47.7868	64.801	8.29935	6.11682	7.37159	11.6073	13.0393	10.6672	9.97902	9.83619
pgaptmp_005044	pgaptmp_005044	pgaptmp_005044	protein_coding	protein_coding	pgaptmp_005044	0.4478	498				TRUE	-0.543294	0.017866	0.185178	Chromosome_II	2005371	2005868	498	+	8.18556	186.563	183.064	169.901	638.046	558.473	560.775	279.164	253.741	274.466	258.304	330.17	203.785	92.7936	174.26	165.999	256.186	179.753	170.666	1086.89	697.687	815.827	15.4367	15.192	14.2399	69.0219	57.9851	55.1178	26.6909	22.1411
pgaptmp_001913	pgaptmp_001913	pgaptmp_001913	protein_coding	protein_coding	pgaptmp_001913	0.4624	1371	GO:0006820	GO:0008509	GO:0016020	TRUE	0.41369	0.0179327	0.185178	Chromosome_I	2057427	2058797	1371	+	8.44222	318.391	345.006	316.114	377.318	357.067	405.737	334.106	418.673	333.582	228.034	357.382	274.183	307.839	293.023	281.935	476.978	396.789	980.335	271.023	317.304	273.327	9.56933	10.3999	9.6238	14.8264	13.4666	14.4857	11.6032	13.2701
pgaptmp_004414	pgaptmp_004414	pgaptmp_004414	protein_coding	protein_coding	pgaptmp_004414	0.4574	1386	GO:0055085	GO:0015297,GO:0042910	GO:0016020	TRUE	0.419486	0.0179374	0.185178	Chromosome_II	1283572	1284957	1386	+	7.65543	222.026	270.196	234.43	354.897	359.798	265.543	266.542	262.697	272.355	149.332	172.342	127.829	120.779	150.951	133.063	133.149	107.852	145.529	253.7	237.023	243.419	6.60083	8.0567	7.05979	13.7944	13.4227	9.37788	9.15663	8.23624
pgaptmp_001393	pgaptmp_001393	pgaptmp_001393	protein_coding	protein_coding	pgaptmp_001393	0.4139	273				TRUE	0.41444	0.0179419	0.185178	Chromosome_I	1451876	1452148	273	+	6.93619	99.449	126.737	156.015	130.684	150.2	150.914	125.475	122.393	124.565	143.278	123.36	101.893	128.143	126.533	117.253	109.553	135.814	84.6713	102.821	98.7594	121.294	15.0105	19.1859	23.853	25.7884	28.4481	27.0583	21.8841	19.4819
pgaptmp_001908	pgaptmp_001908	pgaptmp_001908	protein_coding	protein_coding	pgaptmp_001908	0.4687	1677				TRUE	0.412654	0.0179987	0.185178	Chromosome_I	2049261	2050937	1677	-	6.579	127.202	117.056	132.327	103.779	87.3894	103.084	106.914	97.765	87.2662	72.6481	103.405	83.3666	107.523	109.884	104.079	85.9572	87.8794	82.0253	74.3218	71.3616	73.1088	3.1255	2.8847	3.29348	3.3338	2.69445	3.00877	3.03552	2.53331
pgaptmp_003489	pgaptmp_003489	pgaptmp_003489	protein_coding	protein_coding	pgaptmp_003489	0.4694	1389	GO:0034219	GO:0015288	GO:0016020	TRUE	0.413758	0.0180211	0.185178	Chromosome_II	236676	238064	1389	+	6.71119	70.154	104.734	112.723	124.278	120.843	145.966	191.554	141.05	162.568	72.6481	94.3343	96.3347	98.6852	76.5856	102.761	91.0135	67.9068	92.6092	96.1153	98.1222	98.0322	2.08117	3.11621	3.38727	4.8201	4.49846	5.14379	6.56631	4.41275
pgaptmp_004417	pgaptmp_004417	pgaptmp_004417	protein_coding	protein_coding	pgaptmp_004417	0.4021	189				TRUE	-0.534117	0.0180666	0.185178	Chromosome_II	1286200	1286388	189	+	6.61002	40.088	56.3275	38.391	87.7634	83.293	89.8889	115.823	69.4057	51.3744	181.62	183.226	166.733	67.754	89.9048	88.2694	176.971	141.14	129.653	119.585	105.131	167.818	8.73998	12.3169	8.47831	25.0159	22.7872	23.2797	29.1788	15.9577
pgaptmp_004166	pgaptmp_004166	pgaptmp_004166	protein_coding	protein_coding	pgaptmp_004166	0.4657	1518				TRUE	-0.40946	0.0180815	0.185178	Chromosome_II	1006678	1008195	1518	+	6.62481	81.7178	80.9708	92.3019	168.48	167.951	126.174	100.974	141.05	143.567	80.7201	45.353	50.02	67.754	78.8055	71.1425	60.6757	62.5808	55.5655	208.995	204.528	213.511	2.21821	2.20444	2.53793	5.97917	5.72079	4.06848	3.16717	4.03775
pgaptmp_003556	pgaptmp_003556	pgaptmp_003556	protein_coding	protein_coding	pgaptmp_003556	0.4274	372				TRUE	0.388856	0.0181588	0.185361	Chromosome_II	312315	312686	372	+	6.93429	121.806	139.058	159.282	203.073	218.473	210.29	195.266	156.723	168.199	96.8642	96.1484	51.8725	55.9707	79.9154	82.9996	99.4407	69.2383	85.9943	160.379	177.767	144.556	13.4922	15.4488	17.8717	29.4085	30.3668	27.67	24.9929	18.3074
pgaptmp_001492	pgaptmp_001492	pgaptmp_001492	protein_coding	protein_coding	pgaptmp_001492	0.3824	1122				TRUE	-0.512538	0.0181699	0.185361	Chromosome_I	1542044	1543165	1122	+	9.08812	647.575	697.933	654.282	683.529	540.039	637.469	485.567	408.971	440.553	552.933	462.601	578.008	416.835	341.86	414.998	503.945	430.076	332.07	1062.86	855.702	780.104	23.7824	25.7076	24.3396	32.8192	24.8872	27.8099	20.6058	15.8393
pgaptmp_001741	pgaptmp_001741	pgaptmp_001741	protein_coding	protein_coding	pgaptmp_001741	0.4689	819	GO:0006629	GO:0016491		TRUE	0.412132	0.0182876	0.186201	Chromosome_I	1840770	1841588	819	+	7.36927	310.682	286.918	357.772	262.009	252.61	204.518	256.89	277.623	285.726	92.8282	121.546	101.893	126.671	104.334	140.968	55.6194	91.8739	59.5345	195.025	181.59	163.664	15.6311	14.4782	18.2332	17.2344	15.9482	12.2231	14.9347	14.7302
pgaptmp_003880	pgaptmp_003880	pgaptmp_003880	protein_coding	protein_coding	pgaptmp_003880	0.4713	906		GO:0001216		TRUE	-0.472176	0.0184535	0.187195	Chromosome_II	647019	647924	906	-	6.78578	123.348	169.863	110.272	123.637	109.919	81.6422	177.447	179.858	173.829	70.6301	65.3084	88.9244	88.3748	87.685	73.7774	72.4737	98.5314	80.7023	142.497	144.635	162.833	5.60997	7.74838	5.08017	7.35167	6.27322	4.41082	9.32554	8.62658
pgaptmp_003037	pgaptmp_003037	rfaD	protein_coding	protein_coding	pgaptmp_003037	0.4374	942	GO:0005975	GO:0008712		TRUE	-0.518814	0.0184564	0.187195	Chromosome_I	3289565	3290506	942	+	12.6261	7269.8	7778.47	8022.91	7568.79	6010.07	6006.06	7051.86	6531.6	6865.88	5513.19	5057.77	5439.21	4267.03	5992.55	5650.56	4604.61	4509.81	4351.31	9399.19	8758.36	10246.9	318.002	341.26	355.486	432.852	329.892	312.084	356.439	301.305
pgaptmp_001603	pgaptmp_001603	pgaptmp_001603	protein_coding	protein_coding	pgaptmp_001603	0.4948	1152		GO:0042626,GO:0140359		TRUE	0.473216	0.018535	0.187631	Chromosome_I	1672559	1673710	1152	-	7.03109	100.22	89.7719	98.8365	69.1857	71.0039	78.3435	72.0184	71.6446	86.5624	552.933	595.032	666.933	356.445	290.803	254.269	109.553	161.112	111.131	45.2636	46.5125	62.3086	3.58476	3.22055	3.58101	3.2354	3.18694	3.32877	2.97662	2.70252
pgaptmp_001731	pgaptmp_001731	pgaptmp_001731	protein_coding	protein_coding	pgaptmp_001731	0.4689	2043				TRUE	0.368533	0.0185949	0.187876	Chromosome_I	1829799	1831841	2043	-	8.43612	513.435	466.462	447.623	319.664	339.999	277.089	334.106	322.401	351.176	532.753	553.307	511.315	377.066	359.619	358.347	220.792	251.655	283.12	232.465	250.403	245.081	10.3556	9.43603	9.14503	8.42925	8.60505	6.6387	7.78661	6.85749
pgaptmp_003433	pgaptmp_003433	pgaptmp_003433	protein_coding	protein_coding	pgaptmp_003433	0.476	1002				TRUE	0.528385	0.0188162	0.189748	Chromosome_II	180214	181215	1002	+	7.52257	187.334	145.219	178.886	198.589	193.212	277.913	164.826	192.545	178.051	145.296	221.323	201.932	172.331	177.59	173.904	200.567	183.748	231.523	151.996	168.21	144.556	7.70385	5.98961	7.4516	10.677	9.97037	13.5761	7.8323	8.35029
pgaptmp_004225	pgaptmp_004225	pgaptmp_004225	protein_coding	protein_coding	pgaptmp_004225	0.5103	1170				TRUE	0.435371	0.0190202	0.191439	Chromosome_II	1074905	1076074	1170	-	5.58468	32.3788	23.7632	18.7871	39.7177	46.4256	36.2854	40.8352	35.076	35.188	48.4321	56.2378	74.1036	111.941	97.6744	89.5869	82.5863	71.9013	92.6092	29.0581	31.8579	24.9234	1.14034	0.839382	0.670216	1.82879	2.05171	1.51803	1.66181	1.30275
pgaptmp_004467	pgaptmp_004467	pgaptmp_004467	protein_coding	protein_coding	pgaptmp_004467	0.4239	4239				TRUE	0.406862	0.0191439	0.192316	Chromosome_II	1334180	1338418	4239	-	9.01242	518.831	528.95	498.267	810.37	777.629	684.475	884.267	792.568	857.179	401.583	422.69	340.877	368.228	396.247	391.284	353.941	338.202	340.008	517.458	581.725	628.071	5.04337	5.15695	4.90613	10.2987	9.48534	7.90364	9.93236	8.12476
pgaptmp_000686	pgaptmp_000686	pgaptmp_000686	protein_coding	protein_coding	pgaptmp_000686	0.4921	1014				TRUE	0.685415	0.0191955	0.192353	Chromosome_I	711116	712129	1014	-	9.49037	2054.51	2117.56	2106.61	2060.84	2353.37	1175.98	1315.63	1738.13	1622.17	173.548	186.855	222.311	206.208	180.92	181.809	392.706	390.131	420.711	1009.21	1175.56	1300.17	83.4888	86.3057	86.7134	109.489	120.004	56.7667	61.7775	74.4871
pgaptmp_001850	pgaptmp_001850	pgaptmp_001850	protein_coding	protein_coding	pgaptmp_001850	0.4474	1578	GO:0006508	GO:0008236		TRUE	0.355811	0.0192211	0.192353	Chromosome_I	1980283	1981860	1578	+	7.70908	453.303	373.17	355.321	245.353	232.811	239.979	309.605	345.536	318.099	113.008	116.104	129.681	156.129	147.622	98.809	242.703	187.742	148.175	181.613	186.687	195.234	11.8369	9.77329	9.39843	8.37623	7.62851	7.44386	9.34186	9.51532
pgaptmp_001618	pgaptmp_001618	pgaptmp_001618	protein_coding	protein_coding	pgaptmp_001618	0.4397	3036	GO:0006508	GO:0008233		TRUE	0.52651	0.0192572	0.192353	Chromosome_I	1693059	1696094	3036	+	8.25914	536.562	519.269	542.376	443.942	400.762	548.405	581.344	409.718	477.149	181.62	170.527	203.785	139.927	197.569	168.634	234.276	198.394	195.802	354.844	347.251	272.496	7.28243	7.06858	7.45657	7.8775	6.82541	8.84163	9.11726	5.86435
pgaptmp_000205	pgaptmp_000205	fieF	protein_coding	protein_coding	pgaptmp_000205	0.4818	909	GO:0006812,GO:0055085	GO:0008324	GO:0016020	TRUE	-0.508953	0.0192946	0.192361	Chromosome_I	222851	223759	909	+	10.5149	2137.77	2114.92	2124.58	1196.02	1334.74	1055.58	1770.76	2002.32	2014.16	918.192	1144.71	1054.12	1321.2	1224.26	1301.64	1157.89	1262.27	1509.53	1357.91	1956.07	1844.33	96.907	96.155	97.555	70.8822	75.9234	56.8406	92.7532	95.7208
pgaptmp_004522	pgaptmp_004522	pgaptmp_004522	protein_coding	protein_coding	pgaptmp_004522	0.4615	1560			GO:0098561	TRUE	0.465235	0.0193993	0.192778	Chromosome_II	1398508	1400067	1560	-	7.53902	198.898	170.743	154.381	228.697	204.136	156.687	204.176	272.399	263.206	272.43	273.932	188.964	145.818	170.93	106.714	207.309	183.748	178.604	129.644	137.626	158.679	5.25369	4.52334	4.13057	7.8977	6.76611	4.91633	6.23178	7.58784
pgaptmp_001573	pgaptmp_001573	pgaptmp_001573	protein_coding	protein_coding	pgaptmp_001573	0.4336	1905				TRUE	0.380717	0.0194417	0.192778	Chromosome_I	1635475	1637379	1905	+	9.5573	1098.56	1086.94	1126.41	906.461	966.745	888.168	1019.39	1085.86	1115.46	567.059	691.18	550.22	611.259	515.01	442.664	675.86	551.243	486.86	656.043	729.545	753.519	23.7623	23.5806	24.6798	25.6341	26.2398	22.8209	25.4788	24.7695
pgaptmp_003998	pgaptmp_003998	pgaptmp_003998	protein_coding	protein_coding	pgaptmp_003998	0.4217	1098				TRUE	0.404986	0.0194524	0.192778	Chromosome_II	766462	767559	1098	+	10.9734	1682.15	1725.91	1860.74	3062.75	3148.07	2661.21	2900.78	2573.23	2818.56	1771.81	1821.38	1506.16	1246.08	1541.7	1462.37	1912.97	1599.14	1665.64	2339.18	2249.17	2172.49	63.1279	64.9617	70.7334	150.27	148.247	118.634	125.79	101.839
pgaptmp_001704	pgaptmp_001704	pgaptmp_001704	protein_coding	protein_coding	pgaptmp_001704	0.4676	678				TRUE	0.36172	0.0195553	0.192778	Chromosome_I	1800840	1801517	678	+	8.91342	639.095	641.605	623.242	493.909	528.433	448.62	446.959	467.929	454.629	423.781	556.935	431.654	480.17	491.702	526.982	379.223	484.668	568.885	390.608	391.852	368.867	38.8413	39.1093	38.3679	39.2448	40.2999	32.3878	31.3885	29.9908
pgaptmp_004777	pgaptmp_004777	ctaD	protein_coding	protein_coding	pgaptmp_004777	0.4723	1641	GO:0015990	GO:0004129		TRUE	0.442704	0.0195813	0.192778	Chromosome_II	1701381	1703021	1641	-	5.79525	42.4008	56.3275	55.5445	69.1857	62.1284	76.6942	79.4429	71.6446	57.7083	38.3421	43.5389	42.6096	70.6999	56.6068	48.7458	65.732	49.2657	37.0437	50.2929	54.1584	44.8622	1.06469	1.41858	1.41278	2.27129	1.95761	2.28763	2.30505	1.8972
pgaptmp_002361	pgaptmp_002361	pgaptmp_002361	protein_coding	protein_coding	pgaptmp_002361	0.4539	1236		GO:0004386,GO:0005524,GO:0016887		TRUE	-0.403166	0.0196058	0.192778	Chromosome_I	2569525	2570760	1236	-	11.5056	3375.1	3435.98	3271.41	2335.02	2588.23	2534.21	2144.22	2277.7	2378	3424.55	3724.39	3923.79	2938.46	2883.61	3011.7	2646.13	2603.09	2462.08	3285.8	3288.37	3407.03	112.519	114.888	110.473	101.774	108.275	100.359	82.6006	80.0785
pgaptmp_005035	pgaptmp_005035	napH	protein_coding	protein_coding	pgaptmp_005035	0.4807	855				TRUE	0.490666	0.0196216	0.192778	Chromosome_II	1994006	1994860	855	-	7.50214	208.149	244.672	260.569	389.49	391.887	267.193	319.257	404.493	368.066	80.7201	92.5202	96.3347	106.05	136.522	96.1741	82.5863	78.5588	91.2862	216.26	263.783	266.681	10.0315	11.8266	12.7203	24.5411	23.6995	15.2965	17.779	20.5581
pgaptmp_002668	pgaptmp_002668	pgaptmp_002668	protein_coding	protein_coding	pgaptmp_002668	0.4733	1257	GO:0055130	GO:0008718,GO:0016491,GO:0071949		TRUE	0.438262	0.0197303	0.192778	Chromosome_I	2887164	2888420	1257	+	6.00802	63.2157	88.8918	87.4009	70.4669	65.542	81.6422	51.972	58.2112	66.8572	50.4501	50.7954	48.1674	85.429	61.0465	75.0949	58.9902	63.9123	70.1184	51.4105	56.707	49.0161	2.07228	2.92259	2.90216	3.02005	2.69605	3.17916	1.96864	2.01238
pgaptmp_002335	pgaptmp_002335	menH	protein_coding	protein_coding	pgaptmp_002335	0.4528	795	GO:0009234	GO:0070205		TRUE	-0.691765	0.019747	0.192778	Chromosome_I	2537418	2538212	795	-	9.75988	1236.56	1086.06	921.385	560.532	594.657	385.12	916.192	694.057	779.062	837.471	939.715	918.885	798.319	1035.57	1093.49	1250.59	1039.91	1346.8	582.839	859.525	1078.35	64.0924	56.4586	48.3743	37.9838	38.6762	23.7117	54.8722	37.9372
pgaptmp_000312	pgaptmp_000312	pgaptmp_000312	protein_coding	protein_coding	pgaptmp_000312	0.4335	729		GO:0016491		TRUE	-0.426791	0.0197477	0.192778	Chromosome_I	330060	330788	729	-	9.47863	2853.19	3062.81	2885.86	675.201	565.983	573.145	1152.29	991.084	1130.94	322.881	415.434	314.94	294.583	342.97	386.014	482.035	489.994	519.935	842.127	889.472	742.719	161.273	173.634	165.23	49.8965	40.1439	38.4831	75.2607	59.0772
pgaptmp_001637	pgaptmp_001637	pgaptmp_001637	protein_coding	protein_coding	pgaptmp_001637	0.4233	189				TRUE	0.565226	0.0197669	0.192778	Chromosome_I	1713057	1713245	189	+	6.79996	177.312	244.672	194.406	157.59	154.98	220.187	184.872	160.454	181.57	72.6481	70.7507	96.3347	73.6457	54.3869	63.2378	43.8213	71.9013	48.9506	130.203	130.617	97.2014	38.6576	53.5014	42.9327	44.919	42.3991	57.0245	46.5738	36.8915
pgaptmp_002568	pgaptmp_002568	lipB	protein_coding	protein_coding	pgaptmp_002568	0.4585	663	GO:0009249	GO:0033819		TRUE	-0.530025	0.0197759	0.192778	Chromosome_I	2771411	2772073	663	+	11.192	1583.48	1566.61	1382.08	1577.82	1400.28	1255.15	1123.34	1201.54	1275.21	4837.15	3922.13	4672.23	4105.01	5039.11	5118.31	3337.16	3591.07	3605.15	1935.16	1708.22	2546.35	98.4138	97.6536	87.0081	128.206	109.206	92.6645	80.6733	78.7521
pgaptmp_001726	pgaptmp_001726	pgaptmp_001726	protein_coding	protein_coding	pgaptmp_001726	0.4547	453				TRUE	0.427487	0.0198597	0.192971	Chromosome_I	1822590	1823042	453	-	8.38001	564.315	600.24	686.955	550.923	614.456	677.053	622.922	561.962	544.006	320.863	460.787	402.012	119.306	96.5645	117.253	112.924	107.852	89.9633	466.606	417.338	498.469	51.3313	54.7606	63.2952	65.5175	70.1353	73.1572	65.4739	53.9072
pgaptmp_001505	pgaptmp_001505	tsgA	protein_coding	protein_coding	pgaptmp_001505	0.4713	1167	GO:0055085	GO:0022857		TRUE	0.438341	0.0198961	0.192971	Chromosome_I	1556408	1557574	1167	+	7.09063	130.286	206.827	182.153	144.778	142.008	179.778	193.039	124.632	141.456	165.476	121.546	135.239	129.616	99.8943	75.0949	158.431	115.841	127.007	110.644	122.334	110.494	4.60029	7.32452	6.51489	6.68336	6.29195	7.54046	7.87602	4.64083
pgaptmp_001966	pgaptmp_001966	pgaptmp_001966	protein_coding	protein_coding	pgaptmp_001966	0.3986	705		GO:0008080,GO:0016746		TRUE	0.467162	0.0199281	0.192971	Chromosome_I	2125614	2126318	705	-	6.9403	130.286	171.623	123.341	180.652	168.634	141.018	154.431	111.945	125.269	74.6661	103.405	74.1036	94.2665	73.2558	82.9996	237.646	122.499	162.728	127.968	129.343	94.7091	7.61494	10.0607	7.30232	13.8044	12.368	9.79082	10.4299	6.90004
pgaptmp_000489	pgaptmp_000489	pgaptmp_000489	protein_coding	protein_coding	pgaptmp_000489	0.4237	354				TRUE	0.943619	0.0199423	0.192971	Chromosome_I	510351	510704	354	+	7.44652	3732.04	2078.84	2197.27	121.716	118.795	49.4801	115.081	184.336	237.871	215.926	199.553	209.343	106.05	170.93	165.999	84.2718	94.5369	78.0564	29.0581	54.7955	58.9855	434.411	242.694	259.073	18.5228	17.3516	6.84164	15.4786	22.6279
pgaptmp_000215	pgaptmp_000215	pgaptmp_000215	protein_coding	protein_coding	pgaptmp_000215	0.4795	684				TRUE	-0.369867	0.0200533	0.193689	Chromosome_I	233990	234673	684	+	9.23236	135.682	127.617	130.693	82.6385	75.1002	70.9215	87.61	105.974	97.1188	6108.5	5072.28	5064.98	8086.3	10145.9	8934.97	5470.92	6120.93	5618.73	101.703	99.3965	103.848	8.17383	7.7107	7.97511	6.50864	5.67713	5.07522	6.0986	6.73259
pgaptmp_003138	pgaptmp_003138	pgaptmp_003138	protein_coding	protein_coding	pgaptmp_003138	0.457	639		GO:0008168,GO:1904047		TRUE	-0.637844	0.020127	0.194017	Chromosome_I	3398752	3399390	639	-	11.7302	3849.22	3046.08	2731.48	2058.28	2323.33	1538.83	1749.97	2373.97	2173.91	5979.34	5360.73	6700.82	4190.44	5349.89	5380.48	4840.57	4460.54	4278.55	2683.97	2548.63	4062.52	248.216	197.007	178.418	173.527	187.998	117.875	130.396	161.44
pgaptmp_002628	pgaptmp_002628	pgaptmp_002628	protein_coding	protein_coding	pgaptmp_002628	0.4806	516	GO:0015628		GO:0015627	TRUE	0.42838	0.020161	0.194017	Chromosome_I	2842948	2843463	516	-	6.37609	60.132	66.0088	66.9801	67.9045	70.3211	61.0255	40.0927	35.076	45.0406	135.206	108.847	125.976	131.089	146.512	197.618	139.891	166.438	174.635	55.881	46.5125	41.5391	4.80191	5.28681	5.41798	7.08946	7.04661	5.78888	3.69954	2.95391
pgaptmp_000500	pgaptmp_000500	pgaptmp_000500	protein_coding	protein_coding	pgaptmp_000500	0.526	192				TRUE	-0.689138	0.0202378	0.194306	Chromosome_I	516558	516749	192	+	7.44347	481.827	234.991	374.109	35.8741	34.8192	25.5647	26.7285	35.8223	45.7444	768.859	983.254	872.57	637.772	542.759	635.013	375.852	366.164	467.015	64.2632	34.4065	71.4472	103.407	50.5815	81.3275	10.0657	9.37695	6.51737	6.62835	8.10755
pgaptmp_005271	pgaptmp_005271	pgaptmp_005271	protein_coding	protein_coding	pgaptmp_005271	0.4804	1251				TRUE	-0.642556	0.0202937	0.194306	Chromosome_II	2255125	2256375	1251	+	8.1256	545.813	563.275	433.737	398.459	483.372	281.212	617.724	708.983	736.836	113.008	148.758	101.893	120.779	153.171	155.46	91.0135	81.2219	113.777	487.841	572.804	779.273	17.9782	18.6082	14.4714	17.1589	19.9788	11.003	23.511	24.6273
pgaptmp_003286	pgaptmp_003286	nhaD	protein_coding	protein_coding	pgaptmp_003286	0.4738	1431	GO:0006814	GO:0015297		TRUE	0.373177	0.0203344	0.194306	Chromosome_II	22793	24223	1431	+	7.59831	231.277	226.19	260.569	309.414	318.152	279.563	366.774	304.49	338.508	72.6481	97.9626	83.3666	100.158	79.9154	113.301	230.905	218.367	194.479	226.318	258.686	217.665	6.65964	6.53244	7.60018	11.6484	11.4958	9.56252	12.2037	9.24635
pgaptmp_001881	pgaptmp_001881	pgaptmp_001881	protein_coding	protein_coding	pgaptmp_001881	0.4098	549				TRUE	0.62869	0.0203386	0.194306	Chromosome_I	2019353	2019901	549	+	10.2514	1462.44	2187.97	2394.13	2503.5	2098.03	2955.61	2206.58	1786.64	1868.48	730.517	787.329	741.036	592.111	602.695	604.711	593.273	583.2	525.227	2041.89	1623.48	1289.37	109.765	164.707	182.019	245.663	197.598	263.517	191.373	141.417
pgaptmp_003695	pgaptmp_003695	pgaptmp_003695	protein_coding	protein_coding	pgaptmp_003695	0.4555	966				TRUE	-0.550447	0.0204455	0.194681	Chromosome_II	454098	455063	966	+	13.032	9672.77	9439.25	9690.88	8716.12	8622.19	6021.73	8501.88	9495.15	9421.93	9403.9	10794	11034	6080.19	7754.02	8444.88	5661.38	5108.99	4072.16	10464.3	11612.8	12416	412.602	403.833	418.723	486.083	461.513	305.124	419.055	427.132
pgaptmp_001258	pgaptmp_001258	pgaptmp_001258	protein_coding	protein_coding	pgaptmp_001258	0.4417	1716				TRUE	0.390338	0.0204955	0.194681	Chromosome_I	1342742	1344457	1716	-	9.41612	1250.44	1394.99	1342.05	900.696	796.745	738.903	729.836	631.368	658.015	415.709	451.716	481.674	377.066	492.812	463.744	889.91	659.095	773.949	650.455	606.574	617.271	30.0264	33.5965	32.6432	28.2765	24.0075	21.0767	20.2507	15.9883
pgaptmp_003899	pgaptmp_003899	pgaptmp_003899	protein_coding	protein_coding	pgaptmp_003899	0.3959	831				TRUE	0.476899	0.0205335	0.194681	Chromosome_II	667092	667922	831	-	7.20064	117.951	154.02	160.916	226.775	217.108	245.751	227.934	212.695	215.35	149.332	123.36	118.566	91.3206	82.1353	102.761	141.577	87.8794	84.6713	201.172	155.466	138.741	5.8487	7.65983	8.08236	14.7014	13.5089	14.4753	13.06	11.1223
pgaptmp_004603	pgaptmp_004603	pgaptmp_004603	protein_coding	protein_coding	pgaptmp_004603	0.4108	762	GO:0006310,GO:0015074	GO:0003677		TRUE	0.391139	0.0206329	0.194681	Chromosome_II	1496857	1497618	762	-	8.36836	248.237	289.558	303.044	336.319	402.81	395.016	406.124	332.103	341.323	246.196	210.438	329.761	472.805	386.258	438.712	370.796	343.529	329.424	267.67	307.11	294.927	13.4236	15.7045	16.5994	23.7772	27.3331	25.3742	25.3768	18.9389
pgaptmp_000934	pgaptmp_000934	fadI	protein_coding	protein_coding	pgaptmp_000934	0.4962	1308	GO:0006631,GO:0016042	GO:0003988	GO:0005737	TRUE	0.587735	0.0206526	0.194681	Chromosome_I	980574	981881	1308	+	7.80746	281.387	191.865	205.025	167.199	143.373	94.8369	85.3826	140.304	123.862	565.041	555.121	511.315	377.066	453.964	400.506	372.481	434.071	448.493	86.0568	75.1846	104.678	8.8645	6.06221	6.54243	6.88636	5.66766	3.54897	3.1081	4.66122
pgaptmp_004889	pgaptmp_004889	pgaptmp_004889	protein_coding	protein_coding	pgaptmp_004889	0.4478	1704				TRUE	-0.709032	0.0206919	0.194681	Chromosome_II	1823024	1824727	1704	-	8.83172	647.575	470.863	458.242	493.269	621.284	299.355	230.904	330.61	256.168	522.663	863.522	553.925	374.12	313.002	243.729	450.011	458.038	384.99	666.661	709.793	959.553	15.6595	11.42	11.2245	15.5947	18.8523	8.59903	6.45201	8.43109
pgaptmp_001763	pgaptmp_001763	pgaptmp_001763	protein_coding	protein_coding	pgaptmp_001763	0.4583	384	GO:0000160	GO:0009927		TRUE	0.501727	0.0207877	0.194681	Chromosome_I	1859650	1860033	384	+	4.26588	32.3788	28.1637	44.9257	26.265	27.3092	35.4608	26.7285	23.8815	26.0391	20.18	25.3977	12.9681	20.6208	11.0994	3.95236	11.798	2.66301	9.26092	16.7643	17.8404	23.2619	3.47446	3.0311	4.8832	3.68476	3.67723	4.52011	3.31418	2.70252
pgaptmp_004018	pgaptmp_004018	pgaptmp_004018	protein_coding	protein_coding	pgaptmp_004018	0.4671	456				TRUE	0.552208	0.0208984	0.194681	Chromosome_II	785622	786077	456	-	10.8671	2534.79	2405.36	2025.74	2319.64	2552.73	1671.6	2332.06	3724.03	3365.38	2342.9	2191.46	2291.66	1609.89	1652.7	1749.58	766.873	913.413	1104.7	1271.29	1435.52	1782.86	229.053	218	185.421	274.044	289.456	179.433	243.505	354.883
pgaptmp_004416	pgaptmp_004416	pgaptmp_004416	protein_coding	protein_coding	pgaptmp_004416	0.4137	510		GO:0008080,GO:0016746		TRUE	0.596795	0.0209219	0.194681	Chromosome_II	1285618	1286127	510	-	8.8664	397.796	545.672	582.4	720.685	656.103	935.174	847.144	776.896	717.835	334.989	366.453	344.582	357.918	295.243	295.11	289.895	272.959	296.35	632.014	490.611	422.037	32.1402	44.2184	47.6642	76.1271	66.519	89.7543	79.0897	66.1958
pgaptmp_002909	pgaptmp_002909	calR	protein_coding	protein_coding	pgaptmp_002909	0.4552	960				TRUE	0.56044	0.0209286	0.194681	Chromosome_I	3165980	3166939	960	-	13.9848	33683.9	43427.6	44181.6	35672.9	30734.4	32642.9	50943	47376.5	43822.4	4364.94	4814.68	5020.52	6877.03	6964.85	7011.49	6814.22	6677.5	5645.19	25600.8	22750.3	19630.5	1445.8	1869.55	1920.93	2001.85	1655.38	1664.37	2526.65	2144.51
pgaptmp_004521	pgaptmp_004521	pgaptmp_004521	protein_coding	protein_coding	pgaptmp_004521	0.4449	1524		GO:0016853		TRUE	0.406301	0.0209423	0.194681	Chromosome_II	1396914	1398437	1524	+	7.49249	221.255	198.906	201.757	254.962	258.754	216.888	298.468	258.219	279.393	123.098	134.245	122.271	114.887	110.994	122.523	180.342	125.162	171.989	172.114	211.536	167.818	5.98227	5.39393	5.52567	9.0127	8.77903	6.96599	9.32492	7.36276
pgaptmp_000123	pgaptmp_000123	pgaptmp_000123	protein_coding	protein_coding		0.5	1000				TRUE	-1.11003	0.0209478	0.194681	pgaptmp_000123	1	1000	1000	+	12.9233	4809.02	3280.2	3282.03	2372.17	3828.75	2343.71	15360.7	3253.86	2320.3	35085	6349.43	23585.3	6460.2	16435.9	22524.5	27044.5	22108.3	30412.9	5832.3	2965.97	9794.08	198.159	135.563	136.988	127.794	197.971	114.719	731.381	141.396
pgaptmp_000195	pgaptmp_000195	pgaptmp_000195	protein_coding	protein_coding	pgaptmp_000195	0.4953	636	GO:0000160			TRUE	0.39025	0.0209616	0.194681	Chromosome_I	211864	212499	636	-	7.75862	349.228	391.652	275.272	269.696	298.353	258.121	394.245	380.612	412.403	100.9	121.546	118.566	163.493	192.019	167.317	143.262	147.797	138.914	182.172	228.102	221.819	22.6261	25.4498	18.0653	22.8445	24.2559	19.8655	29.5149	26.0053
pgaptmp_001894	pgaptmp_001894	pgaptmp_001894	protein_coding	protein_coding	pgaptmp_001894	0.4493	957		GO:0003677,GO:0003700		TRUE	-0.381276	0.0210078	0.194681	Chromosome_I	2035004	2035960	957	+	9.8083	1403.08	1519.08	1584.65	1094.16	1022.05	1031.66	1633.41	1526.18	1431.45	540.825	536.98	555.777	427.145	472.833	487.458	530.912	533.934	592.699	1440.61	1390.28	1323.43	60.4127	65.6011	69.1135	61.5932	55.2208	52.7664	81.2671	69.2996
pgaptmp_002235	pgaptmp_002235	pgaptmp_002235	protein_coding	protein_coding	pgaptmp_002235	0.4535	591				TRUE	0.457496	0.0210124	0.194681	Chromosome_I	2421871	2422461	591	+	11.7216	10586.3	11034	13250.6	5459.27	4953.2	5478.27	4665.6	3841.94	4262.67	1454.98	1650.85	1350.54	1257.87	1371.88	1466.33	2430.4	2501.9	2419.75	4306.19	3863.08	3544.94	738.1	771.593	935.815	497.635	433.354	453.721	375.883	282.488
pgaptmp_003278	pgaptmp_003278	pgaptmp_003278	protein_coding	protein_coding	pgaptmp_003278	0.4374	1191	GO:0009966	GO:0009975		TRUE	0.468773	0.0210221	0.194681	Chromosome_II	13844	15034	1191	+	9.17967	532.708	677.69	684.504	1074.94	1028.87	1196.59	1335.68	1064.22	1126.02	288.575	295.702	263.068	251.868	273.044	245.046	578.104	478.011	370.437	881.802	857.614	670.441	18.4304	23.5159	23.9886	48.6225	44.6677	49.1777	53.3978	38.8291
pgaptmp_002156	pgaptmp_002156	pgaptmp_002156	protein_coding	protein_coding	pgaptmp_002156	0.4281	285				TRUE	-0.936916	0.0210424	0.194681	Chromosome_I	2340320	2340604	285	-	7.15901	327.642	226.19	232.797	135.168	147.47	65.1488	135.127	247.025	256.168	147.314	243.092	185.259	63.3353	78.8055	81.6821	53.9339	71.9013	72.7644	155.349	198.156	337.297	47.3711	32.7997	34.0936	25.5502	26.7548	11.1891	22.5752	37.6645
pgaptmp_004208	pgaptmp_004208	pgaptmp_004208	protein_coding	protein_coding	pgaptmp_004208	0.4592	723	GO:0006810			TRUE	0.666767	0.0210436	0.194681	Chromosome_II	1058838	1059560	723	+	9.74728	481.056	599.36	642.846	752.715	1070.52	1345.86	864.963	806.002	650.978	780.967	1150.15	992.989	1138.56	873.52	912.996	1419.14	1158.41	1131.16	758.864	709.793	547.485	27.4167	34.2603	37.1116	56.0863	76.5597	91.1159	56.9629	48.4435
pgaptmp_000773	pgaptmp_000773	pgaptmp_000773	protein_coding	protein_coding	pgaptmp_000773	0.4345	801				TRUE	0.791567	0.0211065	0.194921	Chromosome_I	819091	819891	801	-	13.2954	11025	13090	13267	12996.7	10578.2	20375.1	16770.6	14063.2	13777.5	7349.57	7566.7	6828.65	4364.24	3973.57	3696.78	14049.8	12112.7	24573.2	9543.92	9043.81	7281.8	567.157	675.38	691.321	874.105	682.847	1245.09	996.895	762.94
pgaptmp_004524	pgaptmp_004524	pgaptmp_004524	protein_coding	protein_coding	pgaptmp_004524	0.4367	600		GO:0009055	GO:0016020	TRUE	0.478667	0.0211807	0.194992	Chromosome_II	1401151	1401750	600	-	6.352	58.5901	66.8889	66.1633	121.716	111.968	100.61	83.1552	84.3317	106.268	66.5941	67.1225	50.02	82.4832	109.884	93.5392	74.1592	66.5753	93.9322	94.4389	62.4414	79.755	4.02375	4.60728	4.60264	10.9285	9.64906	8.20769	6.59889	6.10769
pgaptmp_001659	pgaptmp_001659	pgaptmp_001659	protein_coding	protein_coding	pgaptmp_001659	0.464	750		GO:0005524,GO:0016887,GO:0042626,GO:0140359		TRUE	0.372339	0.0211884	0.194992	Chromosome_I	1744945	1745694	750	-	7.97057	396.254	411.015	441.089	307.492	312.007	319.147	412.064	424.643	354.695	171.53	159.643	192.669	226.829	176.48	192.348	155.06	154.455	117.746	218.495	260.597	250.065	21.7706	22.6484	24.5474	22.087	21.5103	20.8287	26.1599	24.6037
pgaptmp_002152	pgaptmp_002152	vcrD	protein_coding	protein_coding	pgaptmp_002152	0.4772	2127				TRUE	-0.522517	0.0212465	0.195186	Chromosome_I	2337131	2339257	2127	-	10.4401	1453.96	1255.05	1473.56	596.407	787.187	773.539	1006.03	1329.9	1270.29	2088.63	3082.19	2915.98	1493.53	1018.92	1302.96	2266.91	2423.34	2594.38	868.391	1022.64	1252.82	28.1672	24.3856	28.9163	15.1056	19.1361	17.8011	22.5204	27.17
pgaptmp_002165	pgaptmp_002165	sctU	protein_coding	protein_coding	pgaptmp_002165	0.4454	1053	GO:0009306,GO:0030254		GO:0016020	TRUE	-0.475993	0.0214068	0.196036	Chromosome_I	2347722	2348774	1053	+	8.56051	380.065	449.74	475.396	390.771	352.971	489.028	423.201	364.193	385.66	345.079	382.78	416.833	195.898	216.438	205.523	337.087	358.175	330.747	604.074	550.504	594.009	14.8726	17.6512	18.8438	19.9921	17.3322	22.732	19.136	15.0294
pgaptmp_001733	pgaptmp_001733	pgaptmp_001733	protein_coding	protein_coding	pgaptmp_001733	0.4603	819				TRUE	0.91508	0.0214136	0.196036	Chromosome_I	1833626	1834444	819	+	10.9007	5105.05	4045.9	4016.36	2991	3713.37	1629.55	3250.48	4097.18	4500.54	3093.6	3176.53	2021.18	1281.43	1434.04	1090.85	417.988	527.276	357.207	951.654	1544.47	1929.91	256.847	204.161	204.687	196.742	234.438	97.3902	188.971	217.389
pgaptmp_002803	pgaptmp_002803	pgaptmp_002803	protein_coding	protein_coding	pgaptmp_002803	0.4617	483				TRUE	0.462539	0.0214743	0.196251	Chromosome_I	3037160	3037642	483	-	10.7469	3570.91	5071.23	4992.47	5308.72	4641.19	4865.54	6803.88	5999.49	5871.47	439.925	424.504	533.546	396.214	379.598	418.95	525.856	474.016	443.201	3970.35	3735.02	3170.26	304.642	433.918	431.429	592.117	496.851	493.08	670.721	539.765
pgaptmp_005254	pgaptmp_005254	pgaptmp_005254	protein_coding	protein_coding	pgaptmp_005254	0.4536	183		GO:0003677		TRUE	-0.399426	0.0215497	0.196557	Chromosome_II	2233013	2233195	183	-	7.63913	506.496	462.061	551.361	506.081	436.264	423.055	670.439	733.611	791.026	76.6841	79.8213	62.9881	58.9165	51.0571	65.8727	15.1689	39.9452	31.7517	568.869	662.644	596.501	114.047	104.349	125.755	148.982	123.266	113.156	174.438	174.202
pgaptmp_004851	pgaptmp_004851	pgaptmp_004851	protein_coding	protein_coding	pgaptmp_004851	0.4535	699	GO:0015031		GO:0005886	TRUE	-0.493794	0.0215824	0.196557	Chromosome_II	1775315	1776013	699	+	8.42875	262.885	238.512	306.312	479.175	591.244	477.483	364.547	470.168	363.14	332.971	350.125	277.889	190.006	218.657	198.936	257.872	195.731	214.324	667.219	630.149	912.198	15.497	14.1018	18.2906	36.9302	43.7354	33.4359	24.8318	29.2289
pgaptmp_000504	pgaptmp_000504	pgaptmp_000504	protein_coding	protein_coding	pgaptmp_000504	0.4799	696				TRUE	-0.399265	0.0216727	0.196587	Chromosome_I	518130	518825	696	+	9.09359	1174.89	685.611	1015.32	118.513	120.16	103.908	132.157	123.885	125.973	2334.83	2927.99	2893.75	1985.49	1783.67	2318.72	1125.87	1404.74	1225.09	177.702	138.9	146.218	69.5576	40.7109	60.8885	9.17317	8.9268	7.30758	9.04097	7.73479
pgaptmp_004629	pgaptmp_004629	pgaptmp_004629	protein_coding	protein_coding	pgaptmp_004629	0.3842	177				TRUE	0.462501	0.0217556	0.196587	Chromosome_II	1537593	1537769	177	-	7.44426	116.409	138.178	153.564	181.292	227.349	205.342	187.842	188.067	201.275	175.566	203.182	148.207	206.208	213.108	158.094	175.285	179.753	187.864	176.584	122.334	145.387	27.1002	32.2633	36.2124	55.1785	66.4146	56.7856	50.5303	46.1718
pgaptmp_004857	pgaptmp_004857	pgaptmp_004857	protein_coding	protein_coding	pgaptmp_004857	0.4768	948				TRUE	0.413094	0.0218035	0.196587	Chromosome_II	1781826	1782773	948	+	6.70461	121.806	126.737	115.99	162.715	161.124	117.928	155.174	198.515	187.2	70.6301	83.4496	72.251	72.1728	95.4545	81.6821	53.9339	62.5808	56.8885	110.086	105.131	114.648	5.29441	5.52505	5.10685	9.24661	8.78812	6.08892	7.79367	9.09961
pgaptmp_004262	pgaptmp_004262	pgaptmp_004262	protein_coding	protein_coding	pgaptmp_004262	0.4355	186				TRUE	0.700428	0.0218264	0.196587	Chromosome_II	1110613	1110798	186	+	6.03879	30.066	52.807	54.7277	89.6852	78.5139	126.999	72.7608	68.6594	69.6722	58.5221	97.9626	61.1355	73.6457	56.6068	34.2538	96.0698	71.9013	62.1805	75.9982	57.9813	41.5391	6.66071	11.7333	12.281	25.976	21.8262	33.421	18.6259	16.0407
pgaptmp_002838	pgaptmp_002838	murF	protein_coding	protein_coding	pgaptmp_002838	0.4549	1365	GO:0009252	GO:0005524,GO:0047480		TRUE	-0.488867	0.021848	0.196587	Chromosome_I	3085914	3087278	1365	-	11.712	4191.51	3208.03	3420.89	2320.92	2584.13	1876.12	2446.4	3121.02	3153.55	4104.62	4250.49	4529.58	4405.48	5129.02	5293.53	2695.01	3227.57	3302.18	2815.84	3055.81	3732.7	126.531	97.1285	104.604	91.5994	97.8872	67.2761	85.335	99.3576
pgaptmp_001387	pgaptmp_001387	pgaptmp_001387	protein_coding	protein_coding	pgaptmp_001387	0.3843	510				TRUE	0.364755	0.0218762	0.196587	Chromosome_I	1447143	1447652	510	-	7.17919	138.766	168.102	170.718	147.34	163.855	146.791	162.598	126.871	123.158	151.35	114.29	116.713	141.4	184.249	167.317	163.487	194.4	127.007	126.291	106.405	122.125	11.2117	13.6221	13.9717	15.5638	16.6124	14.0884	15.1802	10.8101
pgaptmp_003619	pgaptmp_003619	speA	protein_coding	protein_coding	pgaptmp_003619	0.4741	1911	GO:0006527,GO:0008295	GO:0008792		TRUE	0.381117	0.0218812	0.196587	Chromosome_II	368785	370695	1911	-	8.81321	541.188	543.912	477.029	597.688	644.497	509.645	667.469	763.463	703.056	369.295	604.102	527.988	296.056	269.715	284.57	278.097	252.986	289.735	421.343	455.567	476.038	11.6693	11.7628	10.419	16.8491	17.4383	13.0539	16.6304	17.3606
pgaptmp_001904	pgaptmp_001904	pgaptmp_001904	protein_coding	protein_coding	pgaptmp_001904	0.4361	477				TRUE	0.44091	0.0218845	0.196587	Chromosome_I	2046951	2047427	477	-	7.85831	459.47	445.339	537.475	365.787	404.859	366.978	581.344	572.41	558.785	94.8462	87.0778	120.418	89.8477	86.575	104.079	119.666	134.482	137.591	225.2	316.667	299.912	39.6914	38.5846	47.0306	41.3119	43.8863	37.6577	58.0293	52.1467
pgaptmp_000805	pgaptmp_000805	pgaptmp_000805	protein_coding	protein_coding	pgaptmp_000805	0.465	1587				TRUE	-0.495423	0.0220518	0.197609	Chromosome_I	850388	851974	1587	+	11.4985	1364.53	1336.9	1530.74	1941.04	2224.33	2681.82	1565.1	1406.77	1397.67	4205.52	3963.86	4096.08	5420.32	4869.29	5418.69	5066.42	4937.22	5765.59	3468.53	3313.86	3011.58	35.4295	34.8147	40.2593	65.8905	72.4714	82.7153	46.9567	38.5198
pgaptmp_004454	pgaptmp_004454	pgaptmp_004454	protein_coding	protein_coding	pgaptmp_004454	0.4621	528		GO:0016791		TRUE	0.606899	0.0220733	0.197609	Chromosome_II	1322414	1322941	528	-	5.7315	84.8015	53.6871	64.5296	100.576	103.775	56.0775	74.2457	77.615	84.4511	30.2701	23.5836	35.1992	35.3499	52.167	43.476	40.4505	23.9671	41.0127	45.8224	59.2556	60.647	6.61802	4.20221	5.10113	10.2618	10.1625	5.19861	6.6953	6.38777
pgaptmp_001411	pgaptmp_001411	pgaptmp_001411	protein_coding	protein_coding	pgaptmp_001411	0.3496	246				TRUE	0.467961	0.0221438	0.197707	Chromosome_I	1463458	1463703	246	+	7.22141	161.894	187.465	153.564	196.026	235.542	222.661	147.749	145.528	142.159	121.08	143.316	98.1873	166.439	103.224	102.761	144.947	161.112	100.547	193.907	140.812	137.079	27.1177	31.4939	26.0553	42.9283	49.5081	44.3038	28.5971	25.7069
pgaptmp_000505	pgaptmp_000505	pgaptmp_000505	protein_coding	protein_coding	pgaptmp_000505	0.4762	483				TRUE	-0.532583	0.0221594	0.197707	Chromosome_I	518838	519320	483	+	8.41861	834.909	499.026	763.737	81.9979	71.6866	47.0061	71.2759	74.6298	81.6361	1438.84	1630.9	1771.08	1187.17	1068.87	1360.93	782.042	870.805	769.98	112.321	93.6621	96.3706	71.2279	42.699	65.999	9.14576	7.67423	4.76365	7.02633	6.71433
pgaptmp_004441	pgaptmp_004441	dld	protein_coding	protein_coding	pgaptmp_004441	0.4605	1707	GO:0006089	GO:0016901		TRUE	0.912425	0.0222975	0.198471	Chromosome_II	1307857	1309563	1707	-	9.46224	1011.45	870.436	706.559	2085.82	2720.68	1184.22	2029.14	3496.41	3117.65	270.412	255.791	305.678	287.218	267.495	316.189	207.309	215.704	281.797	694.042	1046.21	1444.73	24.4157	21.0739	17.2765	65.8276	82.4114	33.9573	56.5992	89.0073
pgaptmp_001305	pgaptmp_001305	pgaptmp_001305	protein_coding	protein_coding	pgaptmp_001305	0.3876	498				TRUE	0.470215	0.0223401	0.198471	Chromosome_I	1383895	1384392	498	+	6.87374	127.202	127.617	133.96	137.731	164.538	136.895	144.779	158.961	158.346	125.116	96.1484	72.251	129.616	68.8161	59.2854	123.037	143.803	107.162	129.644	87.9277	96.3706	10.525	10.5906	11.2276	14.8993	17.0836	13.4552	13.8423	13.8707
pgaptmp_001304	pgaptmp_001304	pgaptmp_001304	protein_coding	protein_coding	pgaptmp_001304	0.3309	417				TRUE	0.459775	0.0223581	0.198471	Chromosome_I	1383326	1383742	417	+	8.0553	320.704	294.839	311.213	286.352	260.12	350.484	345.985	313.445	331.471	256.286	241.278	240.837	201.789	194.239	164.682	394.392	276.953	256.66	238.053	216.633	201.049	31.6903	29.2207	31.1503	36.9938	32.2538	41.1401	39.5052	32.6635
pgaptmp_001662	pgaptmp_001662	pgaptmp_001662	protein_coding	protein_coding	pgaptmp_001662	0.4645	1029		GO:0042626,GO:0140359	GO:0055052	TRUE	0.443257	0.0224464	0.198736	Chromosome_I	1748103	1749131	1029	-	6.41943	148.788	183.064	177.252	115.31	102.409	97.3109	111.369	136.573	128.788	58.5221	59.866	59.2829	58.9165	55.4968	96.1741	42.1359	62.5808	35.7207	70.4101	66.9015	92.2167	5.95814	7.35241	7.18981	6.0369	5.14598	4.62891	5.15324	5.76747
pgaptmp_001402	pgaptmp_001402	pgaptmp_001402	protein_coding	protein_coding	pgaptmp_001402	0.3559	444				TRUE	0.527627	0.0224635	0.198736	Chromosome_I	1457109	1457552	444	+	6.25495	84.0306	91.5322	95.5692	131.325	96.2648	89.0642	95.777	88.8094	83.7474	70.6301	68.9366	44.4622	76.5915	73.2558	48.7458	65.732	66.5753	47.6276	83.8215	72.6359	58.9855	7.79853	8.51986	8.98413	15.9341	11.2106	9.81868	10.271	8.69188
pgaptmp_000060	pgaptmp_000060	fre	protein_coding	protein_coding	pgaptmp_000060	0.4482	714		GO:0016491		TRUE	-0.497923	0.0225113	0.198763	Chromosome_I	66213	66926	714	+	11.4667	2956.49	3105.93	3060.67	2685.43	2028.39	2466.58	2863.66	2457.56	2701.73	2062.4	2225.93	2415.78	2478.91	2811.47	3098.65	3252.89	3656.32	3752	3065.07	3360.37	3865.63	170.622	179.778	178.92	202.619	146.892	169.095	190.966	149.57
pgaptmp_005037	pgaptmp_005037	pgaptmp_005037	protein_coding	protein_coding	pgaptmp_005037	0.4411	501		GO:0016747		TRUE	0.369617	0.0225846	0.198763	Chromosome_II	1996312	1996812	501	+	8.53641	249.779	340.605	294.876	484.3	426.706	473.36	637.771	508.229	486.298	330.953	290.259	274.183	368.228	519.45	443.982	274.726	343.529	227.554	352.609	359.994	368.036	20.5436	28.0967	24.5665	52.0764	44.0387	46.2473	60.6121	44.0818
pgaptmp_004340	pgaptmp_004340	pgaptmp_004340	protein_coding	protein_coding	pgaptmp_004340	0.4505	2457			GO:0016020	TRUE	0.341385	0.022611	0.198763	Chromosome_II	1198273	1200729	2457	+	8.87161	328.413	392.532	380.643	486.222	499.758	493.976	557.585	585.098	578.49	480.285	480.742	442.769	623.042	606.025	567.823	399.448	426.082	461.723	388.373	395.038	393.79	5.50774	6.60255	6.46627	10.6609	10.5172	9.84088	10.8054	10.3481
pgaptmp_004996	pgaptmp_004996	pgaptmp_004996	protein_coding	protein_coding	pgaptmp_004996	0.4803	558		GO:0016407		TRUE	0.422114	0.0226475	0.198763	Chromosome_II	1948792	1949349	558	-	7.29494	98.6781	90.652	65.3465	180.652	180.241	206.167	204.176	162.693	218.165	115.026	143.316	151.912	166.439	108.774	121.206	239.332	238.34	457.754	120.144	149.095	154.525	7.28693	6.71406	4.88797	17.441	16.7018	18.085	17.4222	12.6699
pgaptmp_000427	pgaptmp_000427	pyrI	protein_coding	protein_coding	pgaptmp_000427	0.4524	462	GO:0006207		GO:0009347	TRUE	-0.484944	0.0226554	0.198763	Chromosome_I	461437	461898	462	-	8.52143	421.695	378.45	462.326	411.911	346.144	258.946	310.347	319.415	311.062	405.619	308.401	437.211	285.745	340.75	372.839	310.12	402.115	301.642	455.989	470.859	518.408	37.611	33.8539	41.7684	48.0315	38.7399	27.4347	31.9844	30.0436
pgaptmp_003382	pgaptmp_003382	pgaptmp_003382	protein_coding	protein_coding	pgaptmp_003382	0.4524	756				TRUE	0.349358	0.0227154	0.198955	Chromosome_II	118678	119433	756	+	6.56432	79.405	86.2515	98.8365	185.136	182.971	172.356	202.691	165.678	180.866	64.5761	52.6095	40.757	35.3499	65.4862	77.7298	40.4505	41.2767	85.9943	150.879	142.086	131.263	4.32797	4.71505	5.45678	13.1927	12.5143	11.1593	12.7657	9.52315
pgaptmp_000640	pgaptmp_000640	pgaptmp_000640	protein_coding	protein_coding	pgaptmp_000640	0.4349	1014				TRUE	-0.641675	0.0227529	0.198955	Chromosome_I	652424	653437	1014	+	12.8499	7441.72	8156.04	8860.98	9769.92	8963.55	12774.1	7018.45	6635.33	6542.85	6427.34	5984.79	5894.94	4006.33	4738.32	4398.98	6013.63	4709.54	3880.33	20250.2	15036.3	14660	302.408	332.417	364.741	519.06	457.074	616.631	329.561	284.356
pgaptmp_003587	pgaptmp_003587	pgaptmp_003587	protein_coding	protein_coding		0.5	1000				TRUE	-0.97332	0.0227965	0.199006	pgaptmp_003587	1	1000	1000	+	12.5415	3614.09	2546.18	2582	1987.17	3165.82	1809.32	11888.2	2859.07	2009.23	23063.8	3833.24	15443.2	3929.73	14313.7	19321.8	19822.4	17964.7	25779.8	4922.56	2385.52	6460.99	148.921	105.228	107.77	107.053	163.693	88.5623	566.044	124.24
pgaptmp_004076	pgaptmp_004076	phhA	protein_coding	protein_coding	pgaptmp_004076	0.4704	795	GO:0006559	GO:0004505		TRUE	0.38039	0.022837	0.19903	Chromosome_II	865819	866613	795	+	5.276	37.7752	37.845	44.1089	45.4832	52.5702	47.0061	50.4871	48.5094	49.9669	26.234	30.8401	25.9363	25.0395	47.7273	38.2062	23.5961	34.6192	41.0127	37.4403	36.9551	33.2313	1.95793	1.96736	2.31579	3.08211	3.41913	2.89414	3.02375	2.65153
pgaptmp_000687	pgaptmp_000687	pgaptmp_000687	protein_coding	protein_coding	pgaptmp_000687	0.4711	2040				TRUE	-0.418765	0.0228894	0.199157	Chromosome_I	712279	714318	2040	-	10.8897	2125.43	2312.07	2250.37	1905.81	1870.68	1494.3	1618.56	1567.23	1611.61	1473.14	1306.17	1482.07	1844.09	2192.12	2210.69	1830.38	1880.09	2438.27	2535.88	2216.67	2366.07	42.9315	46.8395	46.0431	50.3285	47.4147	35.8542	37.7773	33.384
pgaptmp_001289	pgaptmp_001289	pgaptmp_001289	protein_coding	protein_coding	pgaptmp_001289	0.429	303				TRUE	0.728994	0.0231036	0.200688	Chromosome_I	1372157	1372459	303	-	7.80214	232.819	308.041	388.811	327.351	293.574	492.327	452.899	380.612	337.101	137.224	174.156	124.124	141.4	120.983	101.444	261.243	150.46	116.423	285.552	226.191	162.002	31.6616	42.0153	53.5596	58.2016	50.0978	79.5324	71.1691	54.5855
pgaptmp_002221	pgaptmp_002221	cmoA	protein_coding	protein_coding	pgaptmp_002221	0.4472	738				TRUE	-0.39876	0.0231566	0.200817	Chromosome_I	2404221	2404958	738	+	9.98644	816.407	774.503	798.861	406.146	522.971	479.957	514.523	538.827	529.931	2342.9	2387.38	2445.42	1857.34	1975.69	2094.75	1995.56	1894.73	1775.45	607.985	601.477	674.595	45.5836	43.3719	45.181	29.6476	36.6408	31.8331	33.1956	31.7271
pgaptmp_003230	pgaptmp_003230	pgaptmp_003230	protein_coding	protein_coding	pgaptmp_003230	0.4671	987	GO:0006468	GO:0004674		TRUE	-0.439015	0.0232175	0.201015	Chromosome_I	3497195	3498181	987	+	10.4344	1945.04	1598.29	1741.48	1662.38	1469.23	1175.98	1494.57	1478.42	1785.44	1313.72	1132.01	1063.39	1098.79	1236.47	1217.33	744.962	946.701	1047.81	1997.19	1928.04	1977.26	81.2025	66.9238	73.645	90.7355	76.9693	58.3196	72.0993	65.0904
pgaptmp_003831	pgaptmp_003831	pgaptmp_003831	protein_coding	protein_coding	pgaptmp_003831	0.4728	1083	GO:0055085	GO:0022857,GO:0042802	GO:0016020	TRUE	0.43007	0.0235337	0.203296	Chromosome_II	596559	597641	1083	-	6.65291	81.7178	98.5731	104.554	159.512	180.923	136.07	124.733	101.497	121.047	66.5941	96.1484	88.9244	79.5373	82.1353	73.7774	72.4737	79.8904	72.7644	122.379	130.617	98.0322	3.10918	3.76159	4.02953	7.93465	8.63794	6.1499	5.48384	4.07249
pgaptmp_000992	pgaptmp_000992	ansA	protein_coding	protein_coding	pgaptmp_000992	0.4753	1014	GO:0006520	GO:0004067		TRUE	-0.528519	0.0235583	0.203296	Chromosome_I	1049474	1050487	1014	-	11.4366	3022.02	3032	2787.03	2482.36	2642.16	1677.38	1915.54	2277.7	2234.44	3004.81	3258.16	2834.46	2602.64	2999.05	3356.87	3013.56	2937.3	3160.62	3039.37	3116.34	3734.36	122.805	123.576	114.721	131.884	134.73	80.9702	89.9469	97.6104
pgaptmp_003705	pgaptmp_003705	pgaptmp_003705	protein_coding	protein_coding	pgaptmp_003705	0.4598	261				TRUE	-0.432668	0.0236722	0.203722	Chromosome_II	465093	465353	261	-	6.99272	89.427	110.895	102.104	221.651	162.49	189.674	262.087	115.676	151.308	78.7021	83.4496	81.514	35.3499	69.926	67.1901	134.835	133.151	142.883	283.876	247.217	260.865	14.1184	17.5595	16.3284	45.7502	32.1906	35.5713	47.8122	19.2593
pgaptmp_003148	pgaptmp_003148	ubiB	protein_coding	protein_coding	pgaptmp_003148	0.4795	1635	GO:0006744			TRUE	0.468781	0.023703	0.203722	Chromosome_I	3410477	3412111	1635	-	13.3616	12600.7	13391	14282.3	10942.9	13341.2	11578.3	12681.9	14570.7	13625.5	7617.96	7588.47	8282.93	14061.9	11192.6	12424.9	7072.09	7806.62	8365.26	7999.93	9267.45	8896.84	317.568	338.482	364.604	360.56	421.912	346.626	369.317	387.258
pgaptmp_001760	pgaptmp_001760	pgaptmp_001760	protein_coding	protein_coding	pgaptmp_001760	0.4888	849		GO:0015288,GO:0042834		TRUE	0.444518	0.0237237	0.203722	Chromosome_I	1856004	1856852	849	+	5.88038	88.6561	88.8918	90.6682	68.5451	58.7147	66.7982	69.791	61.1964	76.006	34.3061	36.2824	53.7251	61.8624	62.1564	73.7774	43.8213	51.9287	39.6897	48.0577	52.2469	38.2159	4.30288	4.32709	4.45747	4.34944	3.57588	3.85114	3.91403	3.13225
pgaptmp_002151	pgaptmp_002151	pgaptmp_002151	protein_coding	protein_coding	pgaptmp_002151	0.4783	414				TRUE	-0.480847	0.0239439	0.205213	Chromosome_I	2336718	2337131	414	-	8.70525	572.796	466.462	471.311	233.182	295.622	245.751	372.714	519.423	446.184	478.267	776.444	826.256	349.081	265.275	284.57	524.17	482.005	572.854	306.787	338.331	455.268	57.0109	46.5648	47.5169	30.343	36.9216	29.0555	42.8655	54.5203
pgaptmp_001745	pgaptmp_001745	pgaptmp_001745	protein_coding	protein_coding	pgaptmp_001745	0.4276	456				TRUE	0.603908	0.0240498	0.205213	Chromosome_I	1842504	1842959	456	-	5.39666	82.4887	76.5702	65.3465	78.7949	53.9356	60.2008	54.1994	49.2557	38.7068	30.2701	23.5836	18.5259	25.0395	34.408	39.5236	26.967	27.9616	33.0747	30.7346	53.5212	37.3852	7.45398	6.93963	5.98134	9.30888	6.11582	6.46205	5.65929	4.69384
pgaptmp_004798	pgaptmp_004798	pgaptmp_004798	protein_coding	protein_coding	pgaptmp_004798	0.4762	672			GO:0005886,GO:0016020	TRUE	0.437517	0.0240649	0.205213	Chromosome_II	1722895	1723566	672	+	9.71334	1161.01	1491.8	1639.38	2016.64	1772.37	1821.69	1807.14	1500.8	1509.56	381.403	388.222	455.737	310.785	288.583	358.347	342.143	398.12	411.45	1334.44	1608.82	1242.85	71.1909	91.745	101.824	161.667	136.373	132.69	128.043	97.0493
pgaptmp_002181	pgaptmp_002181	sctC	protein_coding	protein_coding	pgaptmp_002181	0.4749	1872	GO:0009306			TRUE	-0.502278	0.024083	0.205213	Chromosome_I	2361679	2363550	1872	-	11.4306	4183.03	3758.98	3924.87	1785.38	2372.48	1731.8	2320.18	3347.15	2754.51	3107.73	4165.22	3918.23	2023.78	1713.74	1883.96	2919.17	3067.79	2921.16	2637.03	2433.3	3349.71	92.0753	82.9862	87.5106	51.3793	65.5302	45.282	59.0131	77.6974
pgaptmp_001540	pgaptmp_001540	pgaptmp_001540	protein_coding	protein_coding	pgaptmp_001540	0.4561	798			GO:0016020	TRUE	0.454598	0.0240923	0.205213	Chromosome_I	1597343	1598140	798	-	4.53697	23.8986	30.8041	40.0247	28.1868	27.9919	21.4414	23.0162	20.8963	21.1128	28.252	14.513	20.3785	8.83748	25.5285	22.3967	23.5961	30.6246	23.8138	15.6467	21.0262	14.9541	1.23404	1.59532	2.09347	1.90286	1.81373	1.31517	1.37329	1.1379
pgaptmp_003990	pgaptmp_003990	pgaptmp_003990	protein_coding	protein_coding	pgaptmp_003990	0.4658	1434	GO:0006006	GO:0016620,GO:0050661,GO:0051287		TRUE	0.348292	0.0241751	0.205586	Chromosome_II	756933	758366	1434	-	6.24217	63.9866	62.4883	53.094	87.7634	91.4857	83.2915	69.0485	73.8835	74.5985	66.5941	112.476	77.8088	67.754	108.774	55.3331	77.53	77.2273	89.9633	64.2632	70.0873	69.7856	1.83865	1.80091	1.54539	3.29707	3.29874	2.84305	2.29265	2.23891
pgaptmp_004713	pgaptmp_004713	pgaptmp_004713	protein_coding	protein_coding	pgaptmp_004713	0.4344	1227				TRUE	0.395367	0.0242572	0.205952	Chromosome_II	1630920	1632146	1227	+	6.24233	150.33	146.099	116.807	147.34	122.891	145.966	134.385	116.422	118.935	26.234	23.5836	31.494	27.9854	46.6173	51.3807	42.1359	49.2657	51.5966	97.233	108.954	109.663	5.04846	4.92091	3.97342	6.46905	5.1787	5.82292	5.21481	4.12315
pgaptmp_004280	pgaptmp_004280	pgaptmp_004280	protein_coding	protein_coding	pgaptmp_004280	0.4061	495				TRUE	0.371111	0.0242971	0.205958	Chromosome_II	1131818	1132312	495	+	6.81395	202.753	225.31	258.119	157.59	179.558	177.304	206.403	173.887	218.165	60.5401	54.4236	55.5777	30.9312	52.167	47.4283	64.0465	73.2328	134.945	145.291	130.617	121.294	16.8779	18.8112	21.7648	17.1509	18.7561	17.5326	19.8538	15.2651
pgaptmp_004993	pgaptmp_004993	pstS	protein_coding	protein_coding	pgaptmp_004993	0.4493	1035	GO:0035435	GO:0042301	GO:0043190	TRUE	0.4389	0.024443	0.206862	Chromosome_II	1945241	1946275	1035	-	4.96187	28.5241	20.2427	35.9406	51.2487	45.0601	39.5841	49.0022	36.5686	41.5218	24.216	14.513	24.0837	17.675	15.5391	26.3491	35.3941	34.6192	33.0747	28.4993	37.5923	29.9081	1.13561	0.808294	1.44939	2.66751	2.25111	1.87203	2.25428	1.53534
pgaptmp_002129	pgaptmp_002129	pgaptmp_002129	protein_coding	protein_coding	pgaptmp_002129	0.4655	333				TRUE	-0.684444	0.0245764	0.207492	Chromosome_I	2314858	2315190	333	-	7.07487	214.317	266.675	269.554	500.956	345.461	294.407	507.841	286.578	331.471	34.3061	36.2824	31.494	22.0937	32.1882	23.7142	40.4505	46.6027	37.0437	735.953	435.178	695.364	26.5198	33.0964	33.7865	81.0437	53.6412	43.2749	72.6133	37.397
pgaptmp_003048	pgaptmp_003048	pgaptmp_003048	protein_coding	protein_coding	pgaptmp_003048	0.313	687				TRUE	-0.420811	0.0245963	0.207492	Chromosome_I	3301085	3301771	687	-	11.6371	3096.8	3293.4	2726.58	3164.61	3129.63	2687.6	2352.85	2188.15	2587.02	3148.09	3299.89	3297.61	2848.62	2673.84	2632.27	5024.28	4087.72	3988.81	4413.48	3618.42	4120.68	185.744	198.12	165.654	248.157	235.549	191.487	163.068	138.407
pgaptmp_001703	pgaptmp_001703	ccoS	protein_coding	protein_coding	pgaptmp_001703	0.3879	165	GO:0008535			TRUE	0.35292	0.0246776	0.207845	Chromosome_I	1800666	1800830	165	+	8.81182	656.055	680.33	650.197	429.208	520.24	456.866	610.3	585.844	501.077	361.223	507.954	298.267	405.051	371.829	413.681	385.965	330.213	416.742	378.873	359.994	368.867	163.838	170.403	164.476	140.135	163.029	135.531	176.113	154.289
pgaptmp_004415	pgaptmp_004415	pgaptmp_004415	protein_coding	protein_coding	pgaptmp_004415	0.4586	399				TRUE	0.582576	0.0247497	0.208119	Chromosome_II	1284965	1285363	399	-	8.89169	464.095	645.126	629.777	729.653	773.532	1006.92	798.142	785.852	770.617	272.43	312.029	335.319	337.297	231.977	264.808	296.637	299.589	333.393	697.395	554.964	440.314	47.9284	66.821	65.8801	98.5162	100.242	123.525	95.2445	85.5865
pgaptmp_000057	pgaptmp_000057	pgaptmp_000057	protein_coding	protein_coding	pgaptmp_000057	0.4522	993				TRUE	-0.471816	0.0248237	0.208409	Chromosome_I	62949	63941	993	+	11.2756	2610.34	3415.73	3582.62	3342.7	3138.51	2726.35	4372.33	3388.94	3706	1426.73	1678.06	1472.81	989.798	1493.97	1439.98	2029.26	1796.2	1770.16	4856.06	4474.12	3574.02	108.32	142.16	150.589	181.348	163.425	134.39	209.651	148.304
pgaptmp_001313	pgaptmp_001313	pgaptmp_001313	protein_coding	protein_coding	pgaptmp_001313	0.3615	1101				TRUE	0.384684	0.0250294	0.209439	Chromosome_I	1387770	1388870	1101	+	9.91549	1069.27	1129.19	1201.56	1293.39	1400.96	1247.72	1375.77	1303.04	1356.85	825.363	903.433	650.259	701.107	677.061	577.045	888.225	778.931	619.159	1117.62	909.861	1018.54	40.0183	42.3859	45.5511	63.2858	65.7934	55.4707	59.4966	51.4288
pgaptmp_002159	pgaptmp_002159	pgaptmp_002159	protein_coding	protein_coding	pgaptmp_002159	0.4221	462				TRUE	-0.623772	0.025038	0.209439	Chromosome_I	2342985	2343446	462	+	6.83102	137.224	147.86	150.297	78.1542	101.727	79.9929	98.7468	141.797	139.344	159.422	174.156	187.112	66.2811	75.4757	80.3647	91.0135	82.5534	88.6403	108.409	112.14	196.064	12.239	13.2266	13.5784	9.11328	11.3851	8.47504	10.1769	13.3371
pgaptmp_003398	pgaptmp_003398	pgaptmp_003398	protein_coding	protein_coding	pgaptmp_003398	0.4601	1317				TRUE	0.440583	0.0250953	0.209439	Chromosome_II	137847	139163	1317	-	7.27934	86.3433	110.015	133.96	180.011	197.309	249.05	196.009	178.365	179.459	149.332	146.944	137.092	107.523	155.391	172.586	158.431	165.107	154.79	162.614	148.458	151.202	2.70148	3.45228	4.24552	7.36339	7.74648	9.25621	7.08635	5.88521
pgaptmp_004097	pgaptmp_004097	pgaptmp_004097	protein_coding	protein_coding	pgaptmp_004097	0.4519	1341				TRUE	0.397709	0.0251056	0.209439	Chromosome_II	908321	909661	1341	-	7.36994	121.035	145.219	137.228	187.698	243.052	223.485	175.962	241.054	204.794	117.044	181.412	177.849	169.385	146.512	160.729	133.149	143.803	123.038	156.467	155.466	185.264	3.71912	4.47545	4.27124	7.54042	9.3716	8.15742	6.24775	7.8113
pgaptmp_001177	pgaptmp_001177	pgaptmp_001177	protein_coding	protein_coding	pgaptmp_001177	0.4444	243				TRUE	0.567718	0.025165	0.209602	Chromosome_I	1253948	1254190	243	-	7.6656	454.073	392.532	416.584	406.786	324.296	211.115	288.816	277.623	316.692	131.17	116.104	70.3985	113.414	144.292	96.1741	178.656	135.814	125.684	207.319	212.811	214.342	76.9978	66.7591	71.5545	90.1829	69.0049	42.5252	56.591	49.6462
pgaptmp_003357	pgaptmp_003357	pgaptmp_003357	protein_coding	protein_coding	pgaptmp_003357	0.4597	372		GO:0003677,GO:0003700		TRUE	-0.369914	0.0253842	0.211094	Chromosome_II	93968	94339	372	+	8.36421	286.783	301	291.609	227.416	236.907	234.206	458.096	394.792	459.555	466.159	393.664	442.769	324.041	357.4	351.76	326.974	252.986	342.654	267.111	316.667	335.636	31.7665	33.4399	32.7189	32.9338	32.929	30.8168	58.6336	46.1171
pgaptmp_001765	pgaptmp_001765	pgaptmp_001765	protein_coding	protein_coding	pgaptmp_001765	0.4503	1077		GO:0016757		TRUE	0.355781	0.0254766	0.211328	Chromosome_I	1861763	1862839	1077	+	6.92476	193.502	201.547	214.01	130.684	160.441	147.616	161.113	131.348	160.457	137.224	92.5202	77.8088	97.2123	84.3552	106.714	94.3844	86.5479	54.2426	113.438	117.874	110.494	7.40333	7.73396	8.2939	6.53689	7.70273	6.70887	7.12276	5.29964
pgaptmp_003590	pgaptmp_003590	pgaptmp_003590	protein_coding	protein_coding	pgaptmp_003590	0.4146	357				TRUE	-0.486705	0.0254927	0.211328	Chromosome_II	341497	341853	357	-	12.2867	2356.71	2740.68	2773.96	3689.91	3360.39	4416.1	3926.86	3225.5	3508.24	10190.9	9146.8	9941	4325.95	5115.7	5333.05	11484.6	7716.08	6932.46	5899.92	5361.04	5051.98	272.017	317.272	324.319	556.815	486.705	605.485	523.733	392.614
pgaptmp_002288	pgaptmp_002288	pgaptmp_002288	protein_coding	protein_coding	pgaptmp_002288	0.4775	1290				TRUE	-0.470293	0.0255568	0.211526	Chromosome_I	2485689	2486978	1290	-	12.8727	5886.77	5579.94	5961.23	4862.86	5700.11	4783.9	4742.82	4724.81	5137.44	11557.1	12840.4	13598	10594.7	10567.7	11880.8	8597.41	10723.9	8924.88	6003.3	7593	7878.3	188.038	178.765	192.88	203.08	228.474	181.52	175.057	159.159
pgaptmp_001572	pgaptmp_001572	pgaptmp_001572	protein_coding	protein_coding	pgaptmp_001572	0.4164	1095				TRUE	0.425994	0.0256675	0.212109	Chromosome_I	1634384	1635478	1095	+	8.27128	343.832	424.216	404.331	325.429	329.758	409.036	360.834	314.191	324.433	385.439	342.869	187.112	212.1	239.746	140.968	541.025	399.452	265.921	294.493	252.951	250.065	12.9387	16.0109	15.4122	16.0106	15.5713	18.2844	15.6901	12.4686
pgaptmp_004156	pgaptmp_004156	tssF	protein_coding	protein_coding	pgaptmp_004156	0.4574	1749	GO:0033103	GO:0003674		TRUE	-0.412122	0.0259794	0.214351	Chromosome_II	993116	994864	1749	+	5.9528	64.7575	59.8479	60.4455	85.2009	92.1685	67.6228	83.8977	102.243	109.083	34.3061	52.6095	44.4622	48.6062	43.2875	51.3807	38.765	25.2986	21.1678	97.233	118.511	120.463	1.52566	1.41417	1.4425	2.62433	2.72481	1.8925	2.28398	2.54027
pgaptmp_004457	pgaptmp_004457	pgaptmp_004457	protein_coding	protein_coding	pgaptmp_004457	0.3984	246				TRUE	0.768367	0.0260611	0.214688	Chromosome_II	1324106	1324351	246	-	4.65052	16.9603	23.7632	20.4208	32.0304	34.8192	63.4995	26.7285	34.3297	31.6692	28.252	21.7695	11.1155	16.2021	16.649	14.492	42.1359	30.6246	15.8759	30.1757	15.2918	23.2619	2.8409	3.99218	3.4648	7.01442	7.31859	12.6348	5.17335	6.06418
pgaptmp_003265	pgaptmp_003265	pgaptmp_003265	protein_coding	protein_coding	pgaptmp_003265	0.4458	738		GO:0005524,GO:0016887,GO:0042626,GO:0140359		TRUE	-0.395467	0.0262431	0.215351	Chromosome_I	3532223	3532960	738	-	10.8931	943.609	1044.7	1076.58	731.575	611.043	677.053	758.049	797.792	846.623	7198.22	5164.8	6409.96	5953.52	6068.02	6574.09	4661.91	6091.64	3749.35	960.036	906.675	829.951	52.6859	58.5028	60.8881	53.4031	42.8114	44.9054	48.9073	46.9755
pgaptmp_001720	pgaptmp_001720	fdh3B	protein_coding	protein_coding	pgaptmp_001720	0.4844	609		GO:0009055		TRUE	0.592768	0.0262561	0.215351	Chromosome_I	1815603	1816211	609	-	10.1473	2363.65	1405.55	1249.75	604.094	879.355	645.716	798.884	1664.24	1411.04	3355.94	3660.9	3795.96	1595.17	1335.25	1309.55	741.592	796.241	683.985	383.903	406.506	627.24	159.928	95.3827	85.6539	53.4381	74.6605	51.8987	62.4596	118.751
pgaptmp_001208	pgaptmp_001208	pgaptmp_001208	protein_coding	protein_coding	pgaptmp_001208	0.4485	1233				TRUE	0.447284	0.0263635	0.215351	Chromosome_I	1287522	1288754	1233	+	11.0934	2486.23	3024.08	3201.98	2625.85	2709.75	3087.56	3284.63	2918.77	3062.06	1483.23	1647.22	1504.3	1807.27	1565.01	1596.75	1875.89	1710.99	1807.2	2320.74	2128.74	1802.8	83.0875	101.361	108.392	114.729	113.635	122.57	126.84	102.867
pgaptmp_002792	pgaptmp_002792	pgaptmp_002792	protein_coding	protein_coding	pgaptmp_002792	0.4628	1437	GO:0006814,GO:0006865	GO:0005283,GO:0015293	GO:0016020	TRUE	-0.444707	0.0263804	0.215351	Chromosome_I	3024517	3025953	1437	-	13.0249	9997.33	8919.98	9575.71	4224.17	4761.35	5242.42	4980.4	5509.17	5573.07	15794.9	16160.2	18688.9	10118.9	9570.98	11352.5	8895.73	10047.5	12068.3	6200.56	6632.81	6787.48	286.672	256.536	278.135	158.361	171.324	178.57	165.021	166.597
pgaptmp_003820	pgaptmp_003820	pgaptmp_003820	protein_coding	protein_coding	pgaptmp_003820	0.464	1584				TRUE	-0.5092	0.0263938	0.215351	Chromosome_II	582006	583589	1584	-	13.2261	4177.63	4310.81	4477.87	6634.14	8633.11	9286.59	6472.74	6144.27	5759.57	14424.7	16156.6	16308.4	17490.9	16045.2	19825	10731.2	11423	9735.88	11684.2	11937.1	11771.3	108.676	112.472	117.993	225.628	281.81	286.968	194.566	168.559
pgaptmp_004477	pgaptmp_004477	tssC	protein_coding	protein_coding	pgaptmp_004477	0.4167	1512	GO:0033103	GO:0003674	GO:0033104	TRUE	0.430412	0.0264198	0.215351	Chromosome_II	1348756	1350267	1512	-	6.19821	47.0263	59.8479	44.9257	92.2476	105.823	93.1876	121.021	78.3613	96.4151	68.6121	96.1484	74.1036	63.3353	63.2664	39.5236	111.239	67.9068	52.9196	78.2334	56.0698	78.9242	1.28158	1.63583	1.24018	3.28676	3.61887	3.01675	3.81101	2.2521
pgaptmp_004742	pgaptmp_004742	pgaptmp_004742	protein_coding	protein_coding	pgaptmp_004742	0.4296	1548				TRUE	0.694136	0.0264279	0.215351	Chromosome_II	1658966	1660513	1548	-	8.68822	822.575	678.57	577.499	698.263	777.629	410.685	621.437	944.067	956.409	252.25	264.862	259.363	234.193	254.175	204.205	276.411	258.312	239.461	305.11	349.162	511.761	21.8959	18.1161	15.5712	24.3003	25.9744	12.9859	19.1143	26.5014
pgaptmp_001815	pgaptmp_001815	pgaptmp_001815	protein_coding	protein_coding	pgaptmp_001815	0.4414	3147				TRUE	0.330365	0.0265142	0.215565	Chromosome_I	1942673	1945819	3147	-	7.63282	313.766	373.17	388.811	304.289	309.959	291.933	336.333	300.012	331.471	137.224	96.1484	127.829	92.7936	116.543	96.1741	143.262	106.52	100.547	258.17	235.111	230.957	4.10834	4.90062	5.15684	5.20899	5.09274	4.54066	5.08869	4.14266
pgaptmp_005111	pgaptmp_005111	pgaptmp_005111	protein_coding	protein_coding	pgaptmp_005111	0.4786	351				TRUE	0.485306	0.0265383	0.215565	Chromosome_II	2081558	2081908	351	+	6.56613	75.5504	105.614	75.1484	144.137	107.871	150.09	180.417	127.617	147.789	90.8102	45.353	64.8407	63.3353	61.0465	51.3807	117.98	107.852	93.9322	108.968	93.025	83.0781	8.86927	12.4353	8.93622	22.1224	15.8907	20.9304	24.4739	15.7993
pgaptmp_003276	pgaptmp_003276	pgaptmp_003276	protein_coding	protein_coding	pgaptmp_003276	0.4736	1005	GO:0006355	GO:0003677,GO:0003700		TRUE	0.44174	0.0265867	0.215565	Chromosome_II	10586	11590	1005	-	5.24917	84.0306	58.0877	68.6138	63.4202	46.4256	47.8308	101.717	94.7798	116.824	8.07201	29.0259	12.9681	14.7291	23.3087	14.492	21.9107	22.6356	35.7207	34.0874	40.7781	37.3852	3.44532	2.38869	2.84962	3.39959	2.38856	2.32956	4.81902	4.09814
pgaptmp_000197	pgaptmp_000197	pgaptmp_000197	protein_coding	protein_coding	pgaptmp_000197	0.4954	1308	GO:0015740	GO:0015556	GO:0005886	TRUE	-0.469031	0.0266529	0.215565	Chromosome_I	214692	215999	1308	-	12.7467	10691.9	10672.3	10791.2	6679.63	6744.68	6315.31	7630.23	8466.75	7691.39	3997.67	4275.88	3886.74	4105.01	3928.06	4400.3	7638.39	6918.5	11430.6	7854.64	10541.8	9229.98	336.827	337.203	344.351	275.111	266.623	236.331	277.756	281.285
pgaptmp_001807	pgaptmp_001807	tssH	protein_coding	protein_coding	pgaptmp_001807	0.4837	2607	GO:0033103	GO:0016887	GO:0033104	TRUE	0.540136	0.0266993	0.215565	Chromosome_I	1931080	1933686	2607	+	5.40725	60.132	79.2105	66.1633	65.9827	51.8874	64.3242	51.972	44.0316	54.8932	30.2701	32.6542	16.6733	27.9854	36.6279	27.6665	33.7087	30.6246	35.7207	46.9401	44.601	28.2466	0.950435	1.25569	1.0593	1.36349	1.02912	1.20772	0.949208	0.73394
pgaptmp_005220	pgaptmp_005220	pgaptmp_005220	protein_coding	protein_coding	pgaptmp_005220	0.4845	741				TRUE	0.507247	0.0267127	0.215565	Chromosome_II	2190804	2191544	741	-	8.75666	3761.33	3511.67	3070.47	2683.51	3100.96	2351.95	3850.38	4768.1	4544.18	28.252	14.513	31.494	32.4041	29.9683	38.2062	37.0796	30.6246	68.7954	1507.11	1952.25	2309.57	209.161	195.856	172.953	195.096	216.382	155.362	247.411	279.617
pgaptmp_004669	pgaptmp_004669	vctD	protein_coding	protein_coding	pgaptmp_004669	0.4583	936				TRUE	0.471961	0.0268032	0.215565	Chromosome_II	1583661	1584596	936	-	7.55714	72.4667	103.854	102.104	372.194	420.561	504.697	191.554	160.454	146.382	161.44	156.014	181.554	162.021	144.292	114.618	188.769	139.808	195.802	364.903	302.65	274.158	3.19022	4.58552	4.5531	21.4219	23.2326	26.3929	9.74424	7.44924
pgaptmp_002149	pgaptmp_002149	pgaptmp_002149	protein_coding	protein_coding	pgaptmp_002149	0.4328	2091			GO:0005576	TRUE	-0.771739	0.0268168	0.215565	Chromosome_I	2334266	2336356	2091	-	11.1375	4050.43	3215.07	2910.37	1572.69	2079.59	1086.09	1931.13	3298.64	3068.39	2663.76	3377.89	3110.5	1160.66	1277.54	1296.37	2068.03	2129.08	2280.83	2050.83	2258.09	3838.21	79.8188	63.5444	58.0945	40.5186	51.4243	25.424	43.9735	68.5516
pgaptmp_004500	pgaptmp_004500	pgaptmp_004500	protein_coding	protein_coding	pgaptmp_004500	0.4375	480				TRUE	0.490395	0.0268347	0.215565	Chromosome_II	1375068	1375547	480	+	5.38838	40.8589	48.4064	51.4603	74.9512	49.8392	73.3955	73.5033	52.9871	66.1534	44.3961	25.3977	31.494	16.2021	32.1882	22.3967	30.3378	25.2986	30.4287	43.5872	47.1496	46.5238	3.50755	4.16777	4.47479	8.41205	5.36876	7.48447	7.29119	4.79697
pgaptmp_004180	pgaptmp_004180	pgaptmp_004180	protein_coding	protein_coding	pgaptmp_004180	0.4395	3315				TRUE	0.378218	0.0268638	0.215565	Chromosome_II	1017085	1020399	3315	+	7.64579	215.087	206.827	199.307	304.289	313.373	279.563	353.41	258.965	292.764	157.404	117.918	183.407	129.616	129.863	139.65	133.149	131.819	179.927	262.641	229.377	200.218	2.67356	2.5785	2.50945	4.94501	4.88789	4.12789	5.07607	3.39465
pgaptmp_001001	pgaptmp_001001	pgaptmp_001001	protein_coding	protein_coding	pgaptmp_001001	0.3774	159				TRUE	0.799957	0.0270303	0.216373	Chromosome_I	1060186	1060344	159	+	7.30322	169.603	301	331.633	477.253	413.734	318.322	213.085	185.828	187.2	113.008	59.866	92.6295	69.2269	65.4862	69.8251	94.3844	101.194	84.6713	278.287	289.269	122.956	43.9536	78.2368	87.0567	161.702	134.545	97.9947	63.81	50.7869
pgaptmp_002691	pgaptmp_002691	hscB	protein_coding	protein_coding	pgaptmp_002691	0.4477	516	GO:0097428	GO:0051087		TRUE	-0.645229	0.0270633	0.216373	Chromosome_I	2915387	2915902	516	-	10.9851	1541.07	1064.06	1051.26	705.31	958.552	545.931	667.469	947.052	1030.3	4536.47	4537.12	4283.19	7283.56	8607.56	7495	4926.53	4766.79	4635.75	1028.77	930.887	1529.47	123.064	85.2233	85.0358	73.6367	96.0528	51.787	61.5906	79.7557
pgaptmp_004681	pgaptmp_004681	rbsD	protein_coding	protein_coding	pgaptmp_004681	0.4476	420		GO:0016872		TRUE	0.602278	0.0270877	0.216373	Chromosome_II	1594576	1594995	420	-	6.42553	575.879	413.655	307.128	177.449	129.719	150.09	325.196	283.593	303.32	14.126	56.2378	27.7889	19.1479	14.4292	15.8094	42.1359	22.6356	44.9816	67.0572	111.503	120.463	56.499	40.7034	30.5219	22.7608	15.9697	17.4918	36.8663	29.3416
pgaptmp_001652	pgaptmp_001652	pgaptmp_001652	protein_coding	protein_coding	pgaptmp_001652	0.4548	1317	GO:0055085	GO:0015562	GO:0019867	TRUE	0.459019	0.0274368	0.218663	Chromosome_I	1727536	1728852	1317	-	6.95305	304.514	300.12	298.96	206.917	206.867	145.966	252.435	254.488	273.059	52.4681	70.7507	48.1674	50.0791	89.9048	61.9203	72.4737	67.9068	41.0127	121.262	124.246	160.341	9.52753	9.41782	9.47476	8.46396	8.12175	5.425	9.12636	8.39689
pgaptmp_000949	pgaptmp_000949	pgaptmp_000949	protein_coding	protein_coding	pgaptmp_000949	0.4507	1014	GO:0008652	GO:0004073,GO:0016620,GO:0051287		TRUE	-0.566475	0.0275331	0.218663	Chromosome_I	998636	999649	1014	+	11.49	3657.26	2946.63	3178.29	1994.21	1998.35	1275.76	1924.45	2151.58	2223.18	4399.25	3807.84	4175.74	2920.79	4128.96	4173.69	3418.06	3613.71	3528.41	2132.42	2623.81	3112.94	148.619	120.096	130.827	105.949	101.901	61.5835	90.3652	92.2054
pgaptmp_000180	pgaptmp_000180	prmA	protein_coding	protein_coding	pgaptmp_000180	0.4762	882	GO:0036211	GO:0008757		TRUE	-0.551172	0.0275378	0.218663	Chromosome_I	192919	193800	882	-	11.4264	2955.72	2170.37	2029.82	1411.26	1754.61	1222.16	1144.13	1572.45	1734.77	4605.08	4513.53	5098.33	4401.07	4438.64	4495.15	5280.47	5484.47	5358.11	1785.4	1924.22	2781.46	138.087	101.697	96.0574	86.1991	102.862	67.8253	61.7644	77.4721
pgaptmp_000490	pgaptmp_000490	pgaptmp_000490	protein_coding	protein_coding	pgaptmp_000490	0.4192	198				TRUE	0.943694	0.0275904	0.218663	Chromosome_I	510701	510898	198	+	6.66501	1982.04	1278.81	1150.91	72.3888	63.4938	28.0387	66.0787	97.765	156.235	125.116	90.7061	83.3666	70.6999	79.9154	96.1741	64.0465	90.5424	66.1495	12.2938	33.1322	31.5697	412.483	266.921	242.616	19.6956	16.581	6.93148	15.8902	21.4563
pgaptmp_004712	pgaptmp_004712	betI	protein_coding	protein_coding	pgaptmp_004712	0.4817	600		GO:0003677		TRUE	-0.367912	0.0276201	0.218663	Chromosome_II	1629614	1630213	600	-	7.69486	148.017	125.857	157.648	309.414	333.855	266.368	345.243	324.64	318.803	161.44	145.13	101.893	110.469	118.763	97.4916	214.05	155.786	215.647	354.844	410.966	425.36	10.1653	8.66896	10.9668	27.7813	28.7707	21.7302	27.3972	23.5119
pgaptmp_002402	pgaptmp_002402	pgaptmp_002402	protein_coding	protein_coding	pgaptmp_002402	0.4113	282				TRUE	-0.403967	0.0276236	0.218663	Chromosome_I	2613955	2614236	282	-	10.148	1174.12	959.327	1127.23	853.931	845.219	709.215	867.19	917.2	989.486	1228.96	1208.2	1254.2	1402.21	1634.94	1666.58	1468.01	1553.87	1371.94	963.389	1030.28	1232.05	171.562	140.592	166.841	163.132	154.976	123.101	146.419	141.336
pgaptmp_004032	pgaptmp_004032	pgaptmp_004032	protein_coding	protein_coding	pgaptmp_004032	0.4345	603				TRUE	0.543799	0.0277273	0.219154	Chromosome_II	802504	803106	603	+	9.81973	1315.19	1853.53	2026.56	2688.63	2428.47	3355.58	3484.35	2996.39	2803.07	199.782	210.438	248.247	200.316	152.061	175.221	473.607	376.816	494.798	2258.15	2052.28	1582.64	89.8733	127.035	140.276	240.203	208.238	272.385	275.13	215.932
pgaptmp_003856	pgaptmp_003856	pgaptmp_003856	protein_coding	protein_coding	pgaptmp_003856	0.4278	540				TRUE	0.428996	0.0277781	0.219226	Chromosome_II	621983	622522	540	-	9.1967	448.677	484.064	511.336	732.216	706.625	789.208	793.687	733.611	774.839	621.545	678.481	505.757	600.949	521.67	577.045	490.462	436.734	465.692	568.869	635.883	465.238	34.2372	37.0468	39.5233	73.0482	67.6611	71.5369	69.9823	59.035
pgaptmp_005048	pgaptmp_005048	pgaptmp_005048	protein_coding	protein_coding	pgaptmp_005048	0.487	1692				TRUE	0.373814	0.0278599	0.219542	Chromosome_II	2011116	2012807	1692	+	7.54933	133.37	167.222	185.421	198.589	215.06	239.979	279.906	305.236	269.54	106.954	154.2	142.65	157.602	156.501	160.729	197.196	210.378	261.952	169.878	179.678	156.187	3.24799	4.08447	4.57403	6.32293	6.57208	6.94232	7.87672	7.83921
pgaptmp_004382	pgaptmp_004382	pgaptmp_004382	protein_coding	protein_coding	pgaptmp_004382	0.4512	1188		GO:0008483,GO:0030170		TRUE	0.444906	0.0279393	0.219839	Chromosome_II	1246060	1247247	1188	-	12.4883	6404.83	7356.02	7163.61	10288.8	10341.3	8202.98	12109.5	13972.2	13022.4	3089.56	3103.96	3188.31	3835.47	3438.58	3412.21	3072.55	2987.9	2978.05	6733.66	7498.7	7136.41	222.151	255.899	251.684	466.566	450.093	337.978	485.335	511.076
pgaptmp_003583	pgaptmp_003583	pgaptmp_003583	protein_coding	protein_coding		0.5	1000				TRUE	-1.4685	0.0280413	0.22	pgaptmp_003583	1	1000	1000	+	9.46953	440.968	330.924	456.608	272.899	469.718	342.237	427.655	446.286	175.236	1927.19	371.895	1776.63	136.981	1933.51	2084.21	2932.66	2428.67	3046.84	1987.13	759.492	309.881	18.1704	13.6763	19.0583	14.7017	24.2874	16.7518	20.3623	19.3933
pgaptmp_001413	pgaptmp_001413	pgaptmp_001413	protein_coding	protein_coding	pgaptmp_001413	0.3781	447				TRUE	0.4805	0.028057	0.22	Chromosome_I	1464352	1464798	447	+	8.76065	659.139	793.865	882.177	784.745	664.978	879.921	831.552	596.292	735.429	230.052	237.65	163.028	231.247	229.757	194.983	301.693	294.263	206.386	654.926	551.778	481.022	60.7614	73.3975	82.3738	94.577	76.9208	96.3539	88.5757	57.9681
pgaptmp_001552	pgaptmp_001552	citE	protein_coding	protein_coding	pgaptmp_001552	0.4703	876	GO:0006084,GO:0006113	GO:0008815	GO:0005737,GO:0009346	TRUE	0.426707	0.0280851	0.22	Chromosome_I	1609778	1610653	876	+	4.38589	35.4624	29.924	31.8564	16.6558	23.8955	21.4414	30.4407	19.4037	20.409	14.126	19.9553	11.1155	20.6208	32.1882	36.8887	10.1126	14.6466	17.1989	12.2938	13.3803	15.7848	1.6681	1.41175	1.51787	1.0243	1.41045	1.19807	1.65457	0.96254
pgaptmp_003985	pgaptmp_003985	pgaptmp_003985	protein_coding	protein_coding	pgaptmp_003985	0.4211	456		GO:0003677		TRUE	0.433837	0.0281379	0.220017	Chromosome_II	753661	754116	456	+	8.38615	353.854	362.608	437.821	529.783	462.891	532.736	691.97	566.44	619.308	244.178	221.323	237.132	166.439	179.81	183.126	289.895	230.351	216.97	444.254	371.463	322.343	31.9755	32.8635	40.075	62.5889	52.4877	57.1847	72.2529	53.9792
pgaptmp_001390	pgaptmp_001390	pgaptmp_001390	protein_coding	protein_coding	pgaptmp_001390	0.3566	945				TRUE	0.687038	0.0281709	0.220017	Chromosome_I	1450482	1451426	945	+	8.76649	430.946	594.959	522.772	606.016	635.621	872.499	654.847	461.212	546.821	377.367	388.222	392.749	316.676	229.757	230.554	456.753	331.545	297.673	544.84	491.248	287.45	18.791	26.0194	23.0899	34.5475	34.7785	45.1925	32.9945	21.2083
pgaptmp_004341	pgaptmp_004341	pgaptmp_004341	protein_coding	protein_coding	pgaptmp_004341	0.4644	1434		GO:0016491		TRUE	-0.374205	0.028257	0.220352	Chromosome_II	1201084	1202517	1434	+	11.2939	2224.11	2135.16	2170.32	1997.42	2078.91	1845.61	2905.98	3062.06	3086.69	2387.3	2746.58	2638.09	3464.29	3156.66	3262.02	2076.46	2331.47	2212.04	2370.47	2612.35	2778.96	63.9095	61.5352	63.1707	75.0385	74.9602	62.9975	96.4886	92.7902
pgaptmp_000501	pgaptmp_000501	pgaptmp_000501	protein_coding	protein_coding	pgaptmp_000501	0.504	375				TRUE	-0.545862	0.0282975	0.220352	Chromosome_I	516746	517120	375	+	7.86406	486.452	296.599	477.846	42.2802	40.9638	37.9348	41.5776	45.5242	54.8932	1200.71	1442.23	1313.49	1218.1	773.626	907.726	529.227	611.161	629.743	68.7337	42.0524	78.0935	53.4524	32.6874	53.186	6.07393	5.64823	4.95152	5.27911	5.27531
pgaptmp_000628	pgaptmp_000628	folK	protein_coding	protein_coding	pgaptmp_000628	0.4877	486	GO:0009396	GO:0003848		TRUE	-0.77472	0.0284632	0.220975	Chromosome_I	635431	635916	486	-	10.3166	1361.45	1093.11	1061.06	634.843	716.866	344.711	542.736	730.626	734.021	2534.61	2280.35	2254.6	2648.3	3894.77	3592.7	1597.79	1716.31	2003.01	724.218	875.454	1333.4	115.431	92.9538	91.1268	70.3711	76.2686	34.7178	53.1723	65.3275
pgaptmp_004896	pgaptmp_004896	pgaptmp_004896	protein_coding	protein_coding	pgaptmp_004896	0.432	1176				TRUE	-0.528052	0.0284988	0.220975	Chromosome_II	1831287	1832462	1176	+	8.14478	296.805	328.284	295.693	581.032	464.939	322.445	290.301	292.549	288.541	244.178	214.066	201.932	117.833	133.192	148.872	210.679	178.422	168.02	673.925	628.874	697.026	10.3997	11.5368	10.4948	26.6169	20.4424	13.4209	11.7537	10.8101
pgaptmp_003308	pgaptmp_003308	pgaptmp_003308	protein_coding	protein_coding	pgaptmp_003308	0.5027	1110				TRUE	0.375515	0.0285118	0.220975	Chromosome_II	45276	46385	1110	+	6.60545	87.8852	65.1286	66.1633	117.872	101.727	89.0642	121.763	130.602	120.343	82.7381	79.8213	101.893	126.671	117.653	92.2218	84.2718	115.841	134.945	75.4394	81.5561	78.9242	3.2625	2.42488	2.48791	5.72073	4.73866	3.92747	5.22306	5.11287
pgaptmp_000122	pgaptmp_000122	pgaptmp_000122	protein_coding	protein_coding		0.5	1000				TRUE	-1.14444	0.0285455	0.220975	pgaptmp_000122	1	1000	1000	+	9.10876	394.712	325.643	400.247	320.945	167.269	531.911	416.519	267.175	381.438	2058.36	692.994	1430.2	390.322	549.418	632.378	1124.19	794.909	605.929	1160.65	649.263	519.238	16.2644	13.4581	16.7059	17.29	8.64885	26.0359	19.832	11.61
pgaptmp_000403	pgaptmp_000403	rluA	protein_coding	protein_coding	pgaptmp_000403	0.4754	753	GO:0001522,GO:0009451	GO:0003723,GO:0009982		TRUE	-0.492877	0.0286628	0.221138	Chromosome_I	442286	443038	753	+	8.64729	399.338	362.608	333.267	260.728	307.228	191.323	204.176	206.725	282.911	627.599	703.879	629.881	749.713	762.526	766.758	372.481	513.961	459.077	305.11	358.082	422.037	21.8526	19.9014	18.473	18.6533	21.0965	12.4367	12.9105	11.9298
pgaptmp_002222	pgaptmp_002222	cmoB	protein_coding	protein_coding	pgaptmp_002222	0.4835	972	GO:0002098	GO:0016765		TRUE	-0.412936	0.0286793	0.221138	Chromosome_I	2405144	2406115	972	+	10.4281	1386.89	1289.37	1242.4	825.744	958.552	658.91	775.125	848.541	906.442	2239.98	2539.77	2423.19	2238.83	2550.63	2663.89	1395.54	1705.66	1824.4	1076.27	1043.03	1165.59	58.7941	54.8218	53.3502	45.7661	50.991	33.1813	37.9698	37.9353
pgaptmp_001167	pgaptmp_001167	pgaptmp_001167	protein_coding	protein_coding	pgaptmp_001167	0.4939	2385		GO:1904047		TRUE	-0.453632	0.0286924	0.221138	Chromosome_I	1241653	1244037	2385	-	11.6452	2838.54	2558.5	2824.6	1376.03	1512.93	1804.37	1772.99	1848.58	1974.05	7422.22	6866.45	7734.57	6411.59	7015.91	7178.81	3623.69	4296.77	4086.71	2133.54	1957.98	2433.36	49.0416	44.3342	49.4322	31.0816	32.8	37.0315	35.3957	33.6812
pgaptmp_002212	pgaptmp_002212	cydX	protein_coding	protein_coding	pgaptmp_002212	0.4074	108		GO:0016682		TRUE	-0.406974	0.0288801	0.222252	Chromosome_I	2393962	2394069	108	-	13.0254	6932.14	6734.65	7278.78	4463.12	4010.35	4403.73	6255.95	7150.28	6797.61	15494.2	13364.6	14950.4	10734.6	10239.2	11310.3	16878	15416.2	14030.3	5856.33	5940.22	5500.6	2644.85	2577.11	2813.04	2226.28	1920.01	1995.86	2758.05	2876.98
pgaptmp_004102	pgaptmp_004102	pgaptmp_004102	protein_coding	protein_coding	pgaptmp_004102	0.4837	984		GO:0005524,GO:0016887		TRUE	0.370506	0.0289214	0.222252	Chromosome_II	916724	917707	984	+	4.96094	21.5858	23.7632	18.7871	32.671	34.8192	36.2854	40.0927	33.5834	37.2993	48.4321	39.9107	18.5259	29.4583	38.8478	30.3014	28.6524	30.6246	31.7517	27.3817	24.8491	24.0927	0.903924	0.998046	0.796904	1.78868	1.82965	1.80497	1.94001	1.48309
pgaptmp_001575	pgaptmp_001575	pgaptmp_001575	protein_coding	protein_coding	pgaptmp_001575	0.4774	1881		GO:0008773		TRUE	0.459411	0.0290303	0.222699	Chromosome_I	1639196	1641076	1881	+	7.84639	363.876	309.801	274.455	181.292	208.232	162.46	198.979	255.98	266.725	260.322	286.631	274.183	322.568	264.165	245.046	276.411	225.024	234.169	114.556	117.237	168.649	7.97117	6.80669	6.09009	5.19224	5.72405	4.22756	5.03675	5.91364
pgaptmp_002409	pgaptmp_002409	pgaptmp_002409	protein_coding	protein_coding	pgaptmp_002409	0.4659	558				TRUE	-0.412204	0.0290642	0.222699	Chromosome_I	2620406	2620963	558	-	9.21236	549.668	486.705	423.935	324.789	370.722	310.075	322.969	344.79	399.032	1124.03	1220.9	1311.63	1324.15	1253.12	1342.49	603.386	572.548	705.153	374.962	456.205	527.546	40.5905	36.0473	31.7107	31.3567	34.3525	27.1998	27.5587	26.8508
pgaptmp_003895	pgaptmp_003895	yqfB	protein_coding	protein_coding	pgaptmp_003895	0.4081	321				TRUE	-0.427791	0.0291687	0.223175	Chromosome_II	663881	664201	321	-	8.66419	269.052	335.325	371.658	468.925	427.389	476.658	441.762	344.79	361.029	399.565	431.761	383.486	259.233	293.023	310.919	525.856	422.087	384.99	742.1	533.938	601.486	34.5374	43.172	48.3258	78.6979	68.8433	72.6834	65.5264	46.6752
pgaptmp_002695	pgaptmp_002695	iscR	protein_coding	protein_coding	pgaptmp_002695	0.4892	507				TRUE	-0.571477	0.0292251	0.223282	Chromosome_I	2918019	2918525	507	-	12.2799	3766.73	2663.23	2466.01	1565.65	2164.25	1322.77	1141.9	1895.6	1801.62	12654.9	13696.6	13157.1	21657.7	24046.8	24421.6	11636.2	13699.9	13785.5	2191.09	2210.3	3165.28	306.136	217.092	203.015	166.36	220.721	127.705	107.239	162.471
pgaptmp_003150	pgaptmp_003150	ubiE	protein_coding	protein_coding	pgaptmp_003150	0.4833	780		GO:0008168		TRUE	-0.429203	0.0293769	0.223631	Chromosome_I	3412755	3413534	780	-	11.7138	2856.27	2410.64	2387.6	1476.6	1633.09	1264.22	1332.71	1626.18	1685.5	5852.21	5955.76	5991.28	9784.57	10597.7	11301.1	5990.04	7154.18	7600.57	1799.37	1821.63	2329.51	150.891	127.726	127.764	101.984	108.258	79.3341	81.3531	90.5967
pgaptmp_004980	pgaptmp_004980	pgaptmp_004980	protein_coding	protein_coding	pgaptmp_004980	0.4862	3624				TRUE	0.419493	0.0294051	0.223631	Chromosome_II	1914255	1917878	3624	-	7.02913	80.9469	88.0117	107.005	156.308	131.084	174.005	173.735	156.723	156.235	191.71	156.014	150.06	154.656	123.203	129.11	89.3281	119.836	112.454	126.291	107.68	110.494	0.920386	1.00368	1.23241	2.32359	1.87028	2.35021	2.28261	1.87923
pgaptmp_001063	pgaptmp_001063	apbC	protein_coding	protein_coding	pgaptmp_001063	0.4643	1077	GO:0016226	GO:0005524,GO:0016887,GO:0051536		TRUE	-0.419484	0.0294238	0.223631	Chromosome_I	1130859	1131935	1077	+	11.151	2793.05	2432.64	2674.3	1502.87	1676.1	1333.49	1917.77	2379.2	2364.63	2344.92	2146.11	2226.81	2835.36	2896.93	2969.54	2405.12	2986.57	2890.73	1716.11	2230.05	2150.89	106.862	93.3478	103.642	75.1743	80.4689	60.6047	84.7838	95.9958
pgaptmp_000817	pgaptmp_000817	pgaptmp_000817	protein_coding	protein_coding	pgaptmp_000817	0.4508	315				TRUE	-0.424763	0.0294407	0.223631	Chromosome_I	861796	862110	315	+	8.36008	334.58	315.962	347.153	335.038	316.786	253.998	256.89	204.486	272.355	343.061	324.728	305.678	228.302	365.169	374.157	431.471	395.457	378.375	372.726	375.286	487.669	43.7671	41.4539	45.9993	57.2991	51.9996	39.4687	38.8302	28.2091
pgaptmp_000523	pgaptmp_000523	metK	protein_coding	protein_coding	pgaptmp_000523	0.4658	1155	GO:0006556	GO:0004478,GO:0005524		TRUE	-0.483912	0.0295135	0.22386	Chromosome_I	530972	532126	1155	-	13.8204	17952.5	18684	18611.5	14872.4	12306.2	11329.3	12977.4	14260.3	12985.1	16004.8	14863.1	17379.2	12303.2	13207.1	13627.7	11167.7	11669.3	10516.4	17074.4	18150.7	19226.8	640.473	668.543	672.574	693.685	550.917	480.124	534.982	536.516
pgaptmp_005126	pgaptmp_005126	pgaptmp_005126	protein_coding	protein_coding	pgaptmp_005126	0.4704	1605		GO:0005524,GO:0016887		TRUE	-0.511404	0.0295853	0.224082	Chromosome_II	2094521	2096125	1605	-	10.4067	1428.52	1101.91	1015.32	896.852	1116.26	737.254	925.102	1202.29	1249.17	2506.36	2516.19	2880.78	1963.39	2054.49	2093.43	1088.79	1022.6	973.72	1167.35	1161.54	1629.99	36.6749	28.3734	26.404	30.103	35.9613	22.4841	27.444	32.5514
pgaptmp_000459	pgaptmp_000459	pgaptmp_000459	protein_coding	protein_coding		0.5	1000				TRUE	1.34172	0.0296861	0.224522	pgaptmp_000459	1	1000	1000	+	9.72701	128.744	253.474	319.381	1201.78	671.806	1957.76	881.297	434.345	496.15	6621.07	2851.8	3590.32	1645.24	554.968	798.377	1798.36	1082.51	1143.06	276.611	339.605	922.167	5.305	10.4755	13.3306	64.7425	34.7366	95.8281	41.9619	18.8744
pgaptmp_004767	pgaptmp_004767	pgaptmp_004767	protein_coding	protein_coding	pgaptmp_004767	0.4228	1173	GO:0055085	GO:0022857	GO:0005886,GO:0016020	TRUE	0.63712	0.0297767	0.224885	Chromosome_II	1692006	1693178	1173	-	8.40101	187.334	203.307	259.752	406.146	376.184	649.014	490.764	482.108	415.218	306.737	283.003	351.992	290.164	270.824	280.618	434.842	375.485	394.251	357.639	317.304	253.388	6.58078	7.16302	9.24277	18.653	16.5824	27.0825	19.9208	17.8601
pgaptmp_003988	pgaptmp_003988	pgaptmp_003988	protein_coding	protein_coding	pgaptmp_003988	0.452	615				TRUE	0.356231	0.0298508	0.225121	Chromosome_II	755503	756117	615	+	8.24897	233.59	237.632	254.034	322.226	345.461	362.03	345.243	334.341	330.767	355.169	364.638	351.992	335.824	286.364	304.332	318.547	262.307	277.828	285.552	280.986	242.588	15.6508	15.9687	17.2408	28.226	29.0448	28.8139	26.729	23.624
pgaptmp_004333	pgaptmp_004333	pgaptmp_004333	protein_coding	protein_coding	pgaptmp_004333	0.4583	840		GO:0016491		TRUE	-0.427579	0.029992	0.225863	Chromosome_II	1190163	1191002	840	+	11.6449	2221.03	2584.02	2923.44	3830.84	3199.27	3856.15	4720.54	4064.34	4121.22	3212.66	2781.05	3104.94	2281.54	2774.84	2895.76	1918.03	2296.85	2407.84	4663.83	5136.76	5050.32	108.951	127.133	145.263	245.685	196.932	224.702	267.575	210.256
pgaptmp_000135	pgaptmp_000135	murB	protein_coding	protein_coding	pgaptmp_000135	0.4234	1044		GO:0008762,GO:0071949		TRUE	-0.560032	0.0300707	0.226073	Chromosome_I	141035	142078	1044	+	11.4301	2776.09	2305.03	2388.41	1614.33	1551.84	1210.61	1891.78	2226.95	2571.54	3168.27	2459.95	2712.19	7701.87	8062.58	7394.87	3077.61	3824.08	3266.46	1573.05	2250.44	2700.04	109.57	91.2467	95.4882	83.3023	76.8584	56.7594	86.2786	92.6932
pgaptmp_003728	pgaptmp_003728	pgaptmp_003728	protein_coding	protein_coding	pgaptmp_003728	0.451	714		GO:0008168,GO:1904047		TRUE	0.377446	0.0301183	0.226073	Chromosome_II	486714	487427	714	+	8.36529	303.744	347.646	380.643	499.675	433.533	465.113	508.583	505.244	470.111	213.908	210.438	196.375	350.553	244.186	297.745	249.444	213.041	260.629	382.785	383.569	318.189	17.5294	20.1225	22.2516	37.701	31.3955	31.8855	33.9154	30.7496
pgaptmp_002727	pgaptmp_002727	pgaptmp_002727	protein_coding	protein_coding	pgaptmp_002727	0.4353	255				TRUE	-0.694987	0.0301488	0.226073	Chromosome_I	2954241	2954495	255	+	10.3747	2690.52	2172.13	1882.8	707.872	817.91	401.614	675.636	734.357	884.626	2566.9	2343.85	2376.87	1405.16	1941.28	1914.26	1857.35	1705.66	1308.44	841.568	950.639	1357.5	434.765	352.036	308.18	149.547	165.848	77.0905	126.155	125.142
pgaptmp_002391	pgaptmp_002391	pgaptmp_002391	protein_coding	protein_coding	pgaptmp_002391	0.4538	465				TRUE	-0.512681	0.0302072	0.226188	Chromosome_I	2603410	2603874	465	+	10.2188	809.469	725.216	731.064	304.289	357.75	267.193	468.491	650.772	610.159	2405.46	1970.14	2163.83	6237.79	6096.88	7073.41	3660.77	3929.27	4944.01	354.844	410.966	581.547	71.7308	64.4549	65.621	35.2531	39.7806	28.1258	47.9712	60.8153
pgaptmp_000771	pgaptmp_000771	pgaptmp_000771	protein_coding	protein_coding	pgaptmp_000771	0.4767	600				TRUE	-0.55546	0.03027	0.226337	Chromosome_I	817497	818096	600	-	8.70104	683.038	622.243	525.222	319.023	370.039	205.342	391.275	394.045	416.626	450.015	582.333	503.905	450.712	581.607	512.49	219.107	282.279	295.027	392.285	405.869	535.023	46.9085	42.8598	36.537	28.6441	31.889	16.7518	31.0501	28.5386
pgaptmp_000022	pgaptmp_000022	pgaptmp_000022	protein_coding	protein_coding		0.5	1000				TRUE	-1.42309	0.0303772	0.226629	pgaptmp_000022	1	1000	1000	+	9.52778	443.281	332.684	492.549	273.54	509.999	398.315	454.384	466.436	208.313	1943.34	377.337	1802.57	138.454	2025.63	2100.02	2919.17	2372.74	2956.88	2078.77	801.544	344.774	18.2657	13.7491	20.5585	14.7362	26.3702	19.4966	21.6349	20.2689
pgaptmp_001379	pgaptmp_001379	pgaptmp_001379	protein_coding	protein_coding	pgaptmp_001379	0.3962	477				TRUE	0.543356	0.0303952	0.226629	Chromosome_I	1442048	1442524	477	-	8.80828	476.43	697.053	613.44	608.578	568.031	794.156	875.357	660.474	668.572	270.412	244.906	266.773	352.026	283.034	268.761	374.167	355.512	373.083	525.282	488.7	351.421	41.1566	60.3933	53.6778	68.7325	61.574	81.493	87.3775	60.1692
pgaptmp_000503	pgaptmp_000503	pgaptmp_000503	protein_coding	protein_coding	pgaptmp_000503	0.5052	576				TRUE	-0.373467	0.0304618	0.226805	Chromosome_I	517552	518127	576	+	8.45478	787.112	456.781	672.252	64.7015	74.4175	61.0255	74.9882	59.7038	56.3008	1753.65	2343.85	2256.46	1796.95	1374.1	1724.55	660.691	920.071	812.315	101.703	82.8305	83.0781	56.3083	32.7738	48.7136	6.0514	6.68031	5.18587	6.19874	4.50419
pgaptmp_003185	pgaptmp_003185	pgaptmp_003185	protein_coding	protein_coding	pgaptmp_003185	0.4762	1554				TRUE	0.358074	0.0306343	0.227767	Chromosome_I	3454694	3456247	1554	-	9.45773	1020.7	1080.78	1049.63	642.53	632.207	726.533	657.075	673.161	700.241	627.599	613.173	746.594	701.107	917.917	714.06	734.85	633.797	629.743	533.105	525.018	519.238	27.0649	28.7428	28.192	22.2744	21.0355	22.8843	20.1324	18.8237
pgaptmp_000560	pgaptmp_000560	rlmD	protein_coding	protein_coding	pgaptmp_000560	0.4788	1320	GO:0006396	GO:0008173		TRUE	-0.480453	0.0308669	0.228551	Chromosome_I	567508	568827	1320	+	10.432	1636.67	1471.56	1329.8	925.039	1059.6	777.662	1072.85	1227.66	1301.25	1507.45	1650.85	1854.44	2122.47	2159.94	2150.08	1085.42	1384.77	1452.64	1059.5	1244.37	1591.78	51.0911	46.0728	42.0488	37.7529	41.5059	28.837	38.6989	40.4149
pgaptmp_000532	pgaptmp_000532	pgaptmp_000532	protein_coding	protein_coding	pgaptmp_000532	0.447	897	GO:0006355	GO:0003677,GO:0003700	GO:0005829	TRUE	-0.433174	0.030879	0.228551	Chromosome_I	541240	542136	897	+	8.87204	671.474	672.409	728.613	436.254	486.103	346.361	605.845	609.725	677.017	280.502	359.196	300.12	409.47	463.953	462.426	301.693	335.539	378.375	481.694	625.688	627.24	30.8457	30.9801	33.9036	26.2006	28.0208	18.9003	32.159	29.5379
pgaptmp_002160	pgaptmp_002160	pgaptmp_002160	protein_coding	protein_coding	pgaptmp_002160	0.4627	1476				TRUE	-0.567815	0.0309034	0.228551	Chromosome_I	2343456	2344931	1476	+	9.2233	1156.38	958.447	809.479	522.096	576.224	489.853	689	980.635	906.442	508.537	761.931	689.164	263.652	377.378	375.474	358.998	384.805	382.344	622.515	666.467	1100.79	32.283	26.8364	22.8908	19.0558	20.1859	16.2447	22.2262	28.8708
pgaptmp_001473	pgaptmp_001473	btuC	protein_coding	protein_coding	pgaptmp_001473	0.491	996		GO:0005524,GO:0022857		TRUE	0.387586	0.0309135	0.228551	Chromosome_I	1524877	1525872	996	+	9.94479	737.773	919.722	900.148	616.906	762.609	762.818	619.209	665.698	619.308	1019.09	1121.13	1120.82	2305.11	1656.03	1861.56	1951.73	1941.34	2249.08	506.282	594.468	550.808	30.5226	38.1627	37.7221	33.3675	39.5901	37.4882	29.6013	29.0439
pgaptmp_001219	pgaptmp_001219	nrfD	protein_coding	protein_coding	pgaptmp_001219	0.4537	972				TRUE	0.36478	0.0312956	0.231052	Chromosome_I	1301551	1302522	972	+	7.60684	359.25	364.368	343.069	271.618	281.285	272.141	376.426	329.864	380.03	86.7742	134.245	98.1873	141.4	95.4545	115.936	91.0135	122.499	127.007	183.29	240.845	219.326	15.2296	15.4923	14.7318	15.0542	14.9632	13.7044	18.4394	14.7471
pgaptmp_002795	pgaptmp_002795	ung	protein_coding	protein_coding	pgaptmp_002795	0.4714	681	GO:0006284	GO:0004844,GO:0016799		TRUE	-0.432698	0.0314266	0.231407	Chromosome_I	3027785	3028465	681	-	12.0305	2960.34	2926.39	3113.76	2310.03	2249.59	1688.92	2686.21	2653.09	2682.73	9276.76	7532.23	8257	9980.46	12154.9	11840	4739.44	5477.82	5089.54	2511.85	3020.13	2982.51	179.124	177.593	190.844	182.741	170.805	121.393	187.813	169.294
pgaptmp_000160	pgaptmp_000160	hupA	protein_coding	protein_coding	pgaptmp_000160	0.4396	273				TRUE	-0.563592	0.0314582	0.231407	Chromosome_I	166510	166782	273	+	14.2716	11636.3	15109	12510.6	13734	10962.6	15858.4	19469.5	12393.8	13160.3	21059.9	18905	19502.2	17913.6	26440.9	25162.1	57011.5	38465.9	59341.4	21197.9	17556.9	22161.1	1756.35	2287.25	1912.74	2710.18	2076.32	2843.34	3395.66	1972.78
pgaptmp_004204	pgaptmp_004204	pgaptmp_004204	protein_coding	protein_coding	pgaptmp_004204	0.4458	1920	GO:0006935			TRUE	0.461207	0.0314756	0.231407	Chromosome_II	1053906	1055825	1920	+	5.9105	36.2334	55.4474	60.4455	78.1542	82.6103	81.6422	57.9117	80.6002	78.8211	42.3781	39.9107	66.6933	58.9165	68.8161	52.6982	55.6194	45.2712	62.1805	47.4989	50.9726	74.7703	0.777617	1.1935	1.31402	2.19288	2.22473	2.08136	1.43614	1.8242
pgaptmp_004832	pgaptmp_004832	pgaptmp_004832	protein_coding	protein_coding	pgaptmp_004832	0.4304	237				TRUE	-0.60639	0.0315877	0.231908	Chromosome_II	1758632	1758868	237	+	10.0688	369.272	506.067	524.405	748.871	606.264	1054.75	625.892	450.018	514.448	3541.6	1946.55	3130.88	1265.23	1409.62	1710.06	1978.7	1623.11	1600.82	1468.55	1130.32	1145.65	64.2031	88.2473	92.3549	170.225	132.269	217.838	125.743	82.5123
pgaptmp_003555	pgaptmp_003555	pgaptmp_003555	protein_coding	protein_coding	pgaptmp_003555	0.4514	288				TRUE	0.500709	0.0316568	0.232091	Chromosome_II	311956	312243	288	+	7.91083	158.81	249.953	235.247	255.603	341.365	395.016	288.816	290.31	245.612	217.944	293.888	246.395	162.021	160.941	189.713	281.468	234.345	216.97	270.464	231.925	201.049	22.7219	35.8681	34.0936	47.8121	61.2872	67.136	47.7487	43.8033
pgaptmp_003553	pgaptmp_003553	pgaptmp_003553	protein_coding	protein_coding	pgaptmp_003553	0.4649	1437		GO:0030170		TRUE	-0.447241	0.0317733	0.232621	Chromosome_II	309430	310866	1437	-	7.88793	234.361	242.912	213.193	249.197	238.955	183.901	380.138	357.477	382.845	145.296	174.156	150.06	185.587	224.207	210.793	205.623	211.709	228.877	272.141	281.624	379.667	6.72026	6.98609	6.19237	9.34221	8.59813	6.26412	12.5956	10.8101
pgaptmp_004606	pgaptmp_004606	pgaptmp_004606	protein_coding	protein_coding	pgaptmp_004606	0.387	261	GO:0015074	GO:0003677,GO:0008907		TRUE	0.416125	0.0321337	0.234933	Chromosome_II	1498963	1499223	261	+	6.05655	49.3391	55.4474	49.8267	92.8882	73.7348	98.1356	71.2759	68.6594	87.9699	56.5041	70.7507	42.6096	53.0249	61.0465	39.5236	99.4407	81.2219	72.7644	66.4984	69.4501	59.8163	7.78948	8.77975	7.96824	19.1728	14.6075	18.4043	13.0027	11.4313
pgaptmp_003851	pgaptmp_003851	pgaptmp_003851	protein_coding	protein_coding	pgaptmp_003851	0.454	630	GO:0006790,GO:0045454	GO:0015035	GO:0005829	TRUE	0.463579	0.0322296	0.235115	Chromosome_II	617550	618179	630	-	4.14917	13.1057	10.5614	14.703	16.6558	17.0682	16.4934	17.819	9.70187	20.409	12.108	21.7695	14.8207	22.0937	21.0888	38.2062	28.6524	25.2986	26.4598	7.26453	14.0175	9.96938	0.857191	0.692824	0.974103	1.42426	1.40085	1.28145	1.34671	0.669195
pgaptmp_004313	pgaptmp_004313	pgaptmp_004313	protein_coding	protein_coding	pgaptmp_004313	0.4514	906				TRUE	0.487959	0.0322479	0.235115	Chromosome_II	1169173	1170078	906	+	10.1854	611.342	708.494	817.648	1586.79	1573.69	2239.8	1136.7	834.361	875.477	1341.97	1257.19	1074.5	1203.37	1087.74	898.504	1808.47	1512.59	1137.77	1382.5	1297.25	1225.4	27.8044	32.3184	37.6686	94.3528	89.8122	121.008	59.7381	40.0187
pgaptmp_003237	pgaptmp_003237	ilvM	protein_coding	protein_coding	pgaptmp_003237	0.4491	285				TRUE	-0.367228	0.0324559	0.235337	Chromosome_I	3505491	3505775	285	+	7.75823	203.524	95.9327	157.648	83.9197	71.0039	74.2202	89.8373	139.558	113.305	518.627	404.549	348.287	895.532	1501.74	1201.52	293.266	383.474	361.176	108.409	90.4763	106.34	29.4258	13.9112	23.088	15.8629	12.8819	12.7471	15.0088	21.2788
pgaptmp_004420	pgaptmp_004420	pgaptmp_004420	protein_coding	protein_coding	pgaptmp_004420	0.4752	1332				TRUE	0.379338	0.0324734	0.235337	Chromosome_II	1290564	1291895	1332	+	8.09632	498.016	526.31	279.356	422.161	386.425	305.127	435.08	394.045	390.587	213.908	190.483	187.112	216.518	224.207	159.412	156.746	185.079	142.883	295.052	265.695	299.081	15.4063	16.3297	8.75377	17.0741	15.0005	11.2127	15.5524	12.8552
pgaptmp_003221	pgaptmp_003221	rsmB	protein_coding	protein_coding	pgaptmp_003221	0.4938	1284	GO:0001510,GO:0006355,GO:0006364	GO:0003723,GO:0008649		TRUE	-0.346469	0.0324873	0.235337	Chromosome_I	3488152	3489435	1284	+	11.7244	2546.36	2576.98	2509.3	1696.33	1782.61	1624.6	1787.84	1826.19	1799.51	5503.1	6298.63	5789.35	6523.53	7924.95	7949.52	6493.98	7068.96	6921.88	2205.06	2058.66	2300.43	81.717	82.9446	81.5698	71.1721	71.7851	61.9318	66.2973	61.8043
pgaptmp_000109	pgaptmp_000109	plsB	protein_coding	protein_coding	pgaptmp_000109	0.4705	2427	GO:0008654	GO:0004366	GO:0005886	TRUE	-0.371862	0.0324893	0.235337	Chromosome_I	112636	115062	2427	-	11.7036	2281.93	2202.93	2080.47	1465.71	1504.74	1193.3	1277.77	1488.86	1403.3	9133.48	10062.9	10854.3	10789.1	11279.2	11489.5	5103.5	5648.25	5459.98	1813.34	1701.85	1929.07	38.7428	37.5122	35.7793	32.5344	32.0578	24.0664	25.0677	26.6577
pgaptmp_005031	pgaptmp_005031	pgaptmp_005031	protein_coding	protein_coding	pgaptmp_005031	0.4522	1758				TRUE	-0.513356	0.0325354	0.235337	Chromosome_II	1989001	1990758	1758	+	11.0217	1322.13	1120.39	1012.87	1153.74	1531.36	974.758	1094.38	1204.52	1274.51	5458.7	6220.62	5802.31	3760.35	4599.58	4510.96	2529.84	2461.95	2151.18	1664.14	1475.66	2129.29	30.9895	26.3385	24.0478	35.3551	45.0405	27.1401	29.6403	29.7738
pgaptmp_001795	pgaptmp_001795	pgaptmp_001795	protein_coding	protein_coding	pgaptmp_001795	0.4501	891				TRUE	0.445629	0.032574	0.235337	Chromosome_I	1918300	1919190	891	-	6.31826	107.158	129.377	128.242	89.6852	88.7548	112.155	121.763	90.302	87.9699	66.5941	52.6095	57.4303	69.2269	61.0465	64.5552	62.3611	51.9287	72.7644	78.2334	74.5474	57.3239	4.95571	6.00097	6.00752	5.4226	5.1506	6.16132	6.50684	4.4041
pgaptmp_001959	pgaptmp_001959	pgaptmp_001959	protein_coding	protein_coding	pgaptmp_001959	0.4381	420				TRUE	-0.452017	0.0326342	0.235337	Chromosome_I	2119554	2119973	420	+	8.4282	589.756	500.786	493.366	296.602	283.333	225.959	459.581	442.555	527.116	282.52	342.869	283.446	334.351	348.52	347.808	229.219	215.704	218.293	303.434	363.817	454.437	57.8604	49.2771	49.0299	38.0442	34.8812	26.3338	52.1009	45.7884
pgaptmp_001445	pgaptmp_001445	pgaptmp_001445	protein_coding	protein_coding	pgaptmp_001445	0.456	1125				TRUE	0.410724	0.032636	0.235337	Chromosome_I	1497495	1498619	1125	+	8.28815	449.448	545.672	563.613	478.535	544.135	546.755	522.69	444.047	456.74	155.386	168.713	177.849	194.425	238.636	205.523	161.802	154.455	164.051	449.283	414.152	324.836	16.4621	20.0457	20.9108	22.9153	25.0091	23.7888	22.122	17.152
pgaptmp_002010	pgaptmp_002010	pgaptmp_002010	protein_coding	protein_coding	pgaptmp_002010	0.4398	855	GO:0030001,GO:0055085		GO:0043190	TRUE	-0.323426	0.0328092	0.236262	Chromosome_I	2176488	2177342	855	-	7.95099	250.55	315.082	358.589	305.57	296.987	283.686	241.299	247.771	221.684	171.53	230.393	192.669	159.075	148.731	180.491	195.511	206.383	251.368	370.491	402.683	353.082	12.075	15.23	17.5054	19.2535	17.9604	16.2407	13.4376	12.5928
pgaptmp_000363	pgaptmp_000363	pgaptmp_000363	protein_coding	protein_coding	pgaptmp_000363	0.4309	1497				TRUE	-0.413223	0.0330053	0.237106	Chromosome_I	391554	393050	1497	+	9.76957	991.407	780.664	863.39	466.363	579.637	408.211	617.724	632.114	650.274	1015.06	1064.89	1167.13	1356.55	1602.75	1619.15	1272.5	1303.54	1480.42	576.133	646.078	736.903	27.289	21.5518	24.0728	16.7829	20.0207	13.3474	19.6474	18.349
pgaptmp_005288	pgaptmp_005288	pgaptmp_005288	protein_coding	protein_coding	pgaptmp_005288	0.5067	2601				TRUE	0.43951	0.0331188	0.237106	Chromosome_II	2273359	2275959	2601	-	8.04489	205.836	326.523	289.158	399.74	344.096	447.795	480.37	445.54	435.627	143.278	152.386	168.586	229.775	167.6	160.729	210.679	233.014	210.355	322.433	316.03	246.742	3.26092	5.18819	4.64019	8.27944	6.84042	8.42698	8.79363	7.44361
pgaptmp_002710	pgaptmp_002710	pgaptmp_002710	protein_coding	protein_coding	pgaptmp_002710	0.4565	609		GO:0051920		TRUE	-0.65198	0.0331279	0.237106	Chromosome_I	2934530	2935138	609	+	15.6693	52655.6	57956.6	66959.7	48567.7	39883.7	57893.4	47051.7	40113.5	40074.9	64025.2	61375.4	62726.9	42123.9	51352.3	52692.9	38175.1	37714.9	35797.4	95575.5	74270.2	63766.6	3562.75	3933.03	4589.2	4296.3	3386.27	4653.12	3678.67	2862.27
pgaptmp_003231	pgaptmp_003231	pgaptmp_003231	protein_coding	protein_coding	pgaptmp_003231	0.4428	603		GO:0015035		TRUE	-0.438641	0.0331414	0.237106	Chromosome_I	3498216	3498818	603	+	11.3797	3808.36	3864.59	4767.02	3891.06	3241.6	3703.59	4295.86	3430.73	3637.03	2141.1	2131.59	1982.27	926.463	1490.64	1418.9	1250.59	1347.48	1360.03	5687.57	4570.97	4629.11	260.243	264.867	329.967	347.628	277.962	300.634	339.207	247.233
pgaptmp_000168	pgaptmp_000168	adhP	protein_coding	protein_coding	pgaptmp_000168	0.4523	1017				TRUE	-0.522951	0.0331516	0.237106	Chromosome_I	177729	178745	1017	-	9.99771	3762.1	3791.54	4838.91	2675.82	2268.03	1931.37	4299.57	4724.07	4318.27	153.368	204.996	194.522	268.07	206.448	208.158	205.623	183.748	228.877	2520.79	3875.19	3591.47	152.429	154.077	198.594	141.743	115.311	92.9562	201.297	201.852
pgaptmp_003881	pgaptmp_003881	pgaptmp_003881	protein_coding	protein_coding	pgaptmp_003881	0.4947	936				TRUE	-0.510854	0.0332635	0.237584	Chromosome_II	648069	649004	936	-	7.50873	328.413	321.243	382.277	319.023	271.044	245.751	472.203	473.153	466.593	64.5761	48.9813	53.7251	66.2811	58.8266	59.2854	97.7553	126.493	92.6092	291.14	447.284	475.207	14.4578	14.184	17.0468	18.3616	14.9729	12.8515	24.0207	21.9666
pgaptmp_005040	pgaptmp_005040	pgaptmp_005040	protein_coding	protein_coding	pgaptmp_005040	0.4498	747				TRUE	0.395052	0.0334311	0.238457	Chromosome_II	1998311	1999057	747	+	9.58678	684.579	764.822	915.667	1331.83	1150.4	1345.03	1431.46	1244.82	1221.73	437.907	402.735	376.076	390.322	521.67	450.569	766.873	648.443	640.327	1064.53	1002.89	876.474	37.7626	42.3137	51.1632	96.0486	79.6291	88.1344	91.2411	72.4144
pgaptmp_004933	pgaptmp_004933	pgaptmp_004933	protein_coding	protein_coding	pgaptmp_004933	0.4711	849				TRUE	0.377862	0.0335632	0.238881	Chromosome_II	1864609	1865457	849	-	7.85311	214.317	198.026	210.742	354.897	314.738	366.153	245.753	226.875	257.576	151.35	163.271	127.829	166.439	187.579	179.174	276.411	302.252	273.859	282.199	286.721	233.45	10.4017	9.63955	10.3606	22.5195	19.1684	21.11	13.7824	11.6122
pgaptmp_001742	pgaptmp_001742	pgaptmp_001742	protein_coding	protein_coding	pgaptmp_001742	0.44	225				TRUE	0.49564	0.0335813	0.238881	Chromosome_I	1841585	1841809	225	+	6.79509	133.37	168.102	190.322	157.59	148.152	169.882	143.294	145.528	139.344	84.7561	72.5649	62.9881	78.0644	51.0571	43.476	139.891	123.83	99.2242	121.821	133.166	79.755	24.4249	30.8768	35.3058	37.732	34.0463	36.957	30.3235	28.1062
pgaptmp_000305	pgaptmp_000305	argE	protein_coding	protein_coding	pgaptmp_000305	0.4679	1137	GO:0006526	GO:0019213		TRUE	0.575385	0.0338677	0.240593	Chromosome_I	321020	322156	1137	-	11.4261	4626.31	4605.65	5223.63	3634.81	3822.6	2512.77	4580.22	5055.42	4960.8	1172.46	1384.17	1230.12	1863.24	1772.57	2176.43	2748.95	2894.69	3127.55	1635.64	2677.34	2419.24	167.661	167.406	191.758	172.221	173.837	108.174	191.804	193.212
pgaptmp_001774	pgaptmp_001774	pgaptmp_001774	protein_coding	protein_coding	pgaptmp_001774	0.4538	639				TRUE	0.45918	0.0339351	0.240747	Chromosome_I	1873379	1874017	639	+	7.71023	280.616	372.289	401.064	408.708	402.81	385.945	254.663	246.278	268.132	147.314	137.873	140.797	91.3206	107.664	105.396	126.408	117.173	107.162	366.579	281.624	225.973	18.0955	24.0781	26.1971	34.4569	32.5945	29.5636	18.9757	16.748
pgaptmp_004626	pgaptmp_004626	pgaptmp_004626	protein_coding	protein_coding	pgaptmp_004626	0.4096	708				TRUE	0.479534	0.0340224	0.240885	Chromosome_II	1533681	1534388	708	-	8.11234	270.594	269.316	214.01	300.445	384.377	216.888	285.846	323.893	319.507	296.647	357.382	331.614	263.652	278.594	223.967	328.66	280.948	292.381	216.26	193.696	235.111	15.7486	15.7206	12.6166	22.8611	28.0716	14.9946	19.2235	19.8795
pgaptmp_002705	pgaptmp_002705	pgaptmp_002705	protein_coding	protein_coding	pgaptmp_002705	0.4459	222				TRUE	-0.486618	0.0340618	0.240885	Chromosome_I	2928704	2928925	222	+	5.89721	82.4887	128.497	133.96	80.0761	60.7629	79.9929	144.779	75.3761	89.3775	18.162	27.2118	33.3466	26.5124	34.408	27.6665	37.0796	31.9561	39.6897	124.615	113.414	83.0781	15.3109	23.9211	25.1863	19.4318	14.1524	17.6373	31.0517	14.7543
pgaptmp_002784	pgaptmp_002784	dsbC	protein_coding	protein_coding	pgaptmp_002784	0.4601	789			GO:0042597	TRUE	-0.387343	0.0340918	0.240885	Chromosome_I	3016493	3017281	789	-	12.3088	5858.24	5142.52	5646.75	4010.85	4089.55	3320.94	3953.59	4558.39	4599.77	5561.62	4961.62	4890.84	4728.05	6311.1	6379.11	5909.14	6367.26	6862.34	4873.94	4837.3	5375.99	305.949	269.365	298.719	273.857	268.005	206.024	238.587	251.057
pgaptmp_000271	pgaptmp_000271	astA	protein_coding	protein_coding	pgaptmp_000271	0.4873	1020	GO:0006527	GO:0008791		TRUE	0.673603	0.0342866	0.241936	Chromosome_I	286342	287361	1020	+	7.62997	292.18	179.544	175.619	166.558	248.514	100.61	142.552	395.538	288.541	143.278	219.509	183.407	304.893	255.285	227.92	257.872	255.649	313.548	90.5272	103.857	122.956	11.8034	7.27465	7.1864	8.79691	12.5978	4.82805	6.65434	16.851
pgaptmp_001525	pgaptmp_001525	pgaptmp_001525	protein_coding	protein_coding	pgaptmp_001525	0.4916	1131				TRUE	0.457957	0.0343462	0.242033	Chromosome_I	1585100	1586230	1131	+	4.57786	33.1497	29.0439	28.5891	25.6243	17.751	21.4414	10.3944	22.3889	21.8165	28.252	23.5836	22.2311	35.3499	32.1882	40.8411	18.5398	25.2986	27.7828	11.1762	14.0175	17.4464	1.20774	1.06129	1.05506	1.22055	0.811528	0.927947	0.437592	0.860218
pgaptmp_004487	pgaptmp_004487	tagH	protein_coding	protein_coding	pgaptmp_004487	0.3802	1173	GO:0033103	GO:0003674		TRUE	0.388283	0.0344429	0.242038	Chromosome_II	1361611	1362783	1173	-	4.44863	15.4185	18.4825	17.1534	29.468	25.9437	24.7401	28.9558	26.1204	19.7053	20.18	18.1412	25.9363	22.0937	15.5391	18.4444	23.5961	25.2986	14.5529	17.3231	22.3005	17.4464	0.541628	0.651183	0.610372	1.35337	1.14361	1.03237	1.17536	0.967653
pgaptmp_005267	pgaptmp_005267	pgaptmp_005267	protein_coding	protein_coding	pgaptmp_005267	0.4708	291		GO:0004497		TRUE	0.313099	0.034625	0.242038	Chromosome_II	2252516	2252806	291	+	7.75794	189.647	169.863	261.386	291.477	318.835	274.615	357.122	373.149	337.101	153.368	188.669	118.566	116.36	152.061	123.841	296.637	205.052	166.697	246.435	222.368	246.742	26.8541	24.1238	37.4913	53.9604	56.6522	46.1916	58.4327	55.722
pgaptmp_000018	pgaptmp_000018	pgaptmp_000018	protein_coding	protein_coding	pgaptmp_000018	0.4679	624				TRUE	-0.37366	0.0346283	0.242038	Chromosome_I	22157	22780	624	+	11.2099	2922.57	3237.95	3832.57	2944.88	2632.6	2754.39	4019.66	3040.42	3398.45	1230.98	1396.87	1230.12	1229.88	1396.3	1710.06	2037.69	1947.99	1898.49	3417.12	3865	3650.45	192.992	214.451	256.358	254.242	218.145	216.06	306.717	211.732
pgaptmp_003824	pgaptmp_003824	pgaptmp_003824	protein_coding	protein_coding	pgaptmp_003824	0.4258	1017		GO:0005525,GO:0046872	GO:0005886	TRUE	0.409126	0.0346423	0.242038	Chromosome_II	587900	588916	1017	-	7.59803	117.18	141.699	157.648	340.804	337.951	332.341	256.89	189.56	242.093	157.404	137.873	159.323	132.562	155.391	146.237	163.487	174.427	171.989	265.435	296.915	201.88	4.74779	5.7582	6.47008	18.0529	17.1821	15.9954	12.0271	8.09958
pgaptmp_002725	pgaptmp_002725	rdgC	protein_coding	protein_coding	pgaptmp_002725	0.4612	915	GO:0006310			TRUE	-0.364296	0.0346767	0.242038	Chromosome_I	2951757	2952671	915	+	11.7711	4162.98	4771.11	4730.27	3643.78	3392.48	3287.13	3309.87	3110.57	3168.33	2871.62	3252.72	3330.96	3091.65	3323.15	3272.56	2816.36	2686.98	2897.35	4314.57	4553.76	4577.61	187.474	215.497	215.777	214.534	191.708	175.844	172.236	147.726
pgaptmp_004196	pgaptmp_004196	pgaptmp_004196	protein_coding	protein_coding	pgaptmp_004196	0.45	540				TRUE	0.450752	0.0347002	0.242038	Chromosome_II	1042260	1042799	540	+	5.69366	56.2774	42.2456	60.4455	69.8263	82.6103	94.0122	89.8373	79.8539	103.453	30.2701	34.4683	40.757	47.1332	46.6173	43.476	26.967	25.2986	19.8448	61.4691	67.5387	47.3545	4.29436	3.23318	4.67209	6.9661	7.91014	8.52164	7.92129	6.42598
pgaptmp_000487	pgaptmp_000487	pgaptmp_000487	protein_coding	protein_coding	pgaptmp_000487	0.4416	231				TRUE	0.532871	0.0347337	0.242038	Chromosome_I	509641	509871	231	+	5.03041	444.822	308.041	272.005	30.7492	19.1164	14.844	41.5776	32.0908	38.7068	18.162	27.2118	40.757	27.9854	18.8689	21.0793	8.42718	17.3096	21.1678	15.0879	11.4688	12.4617	79.3474	55.111	49.1479	7.17111	4.27896	3.14538	8.56999	6.03679
pgaptmp_005224	pgaptmp_005224	mtgA	protein_coding	protein_coding	pgaptmp_005224	0.4646	678	GO:0009252	GO:0016763	GO:0009274,GO:0016020	TRUE	0.470991	0.0347406	0.242038	Chromosome_II	2195461	2196138	678	-	6.62051	42.4008	66.0088	65.3465	100.576	113.333	101.434	103.202	105.974	103.453	127.134	79.8213	146.355	141.4	150.951	165.999	104.497	83.8849	133.622	81.5863	88.5649	53.17	2.57693	4.02359	4.02285	7.99147	8.64313	7.32298	7.24752	6.79217
pgaptmp_003987	pgaptmp_003987	pgaptmp_003987	protein_coding	protein_coding	pgaptmp_003987	0.4568	915		GO:0003677,GO:0003700		TRUE	0.32781	0.0347608	0.242038	Chromosome_II	754480	755394	915	+	8.63397	424.778	399.573	411.683	532.986	535.943	440.373	565.01	676.146	642.532	343.061	351.94	326.056	403.578	358.509	325.411	214.05	234.345	273.859	402.343	395.675	412.068	19.1293	18.0475	18.7794	31.3805	30.2859	23.5577	29.4014	32.1112
pgaptmp_002067	pgaptmp_002067	lolA	protein_coding	protein_coding	pgaptmp_002067	0.4482	627	GO:0042953		GO:0042597	TRUE	-0.390485	0.0348533	0.242246	Chromosome_I	2231745	2232371	627	-	9.96799	1026.1	816.748	1043.91	671.998	678.633	645.716	649.65	741.074	767.802	1632.56	1337.01	1380.18	1739.51	2431.87	2275.24	719.681	852.164	885.08	758.305	849.331	1045.95	67.4341	53.8347	69.4922	57.7384	55.9643	50.4088	49.3338	51.3607
pgaptmp_001580	pgaptmp_001580	pgaptmp_001580	protein_coding	protein_coding	pgaptmp_001580	0.4444	387				TRUE	0.355921	0.0349419	0.242246	Chromosome_I	1645904	1646290	387	+	4.86846	35.4624	30.8041	47.3762	37.1553	37.5501	37.9348	28.9558	48.5094	33.7805	30.2701	18.1412	12.9681	22.0937	26.6385	19.7618	33.7087	18.6411	18.5218	27.3817	31.2207	25.7542	3.77586	3.28957	5.10964	5.17218	5.017	4.79799	3.56252	5.44693
pgaptmp_000572	pgaptmp_000572	rpoS	protein_coding	protein_coding	pgaptmp_000572	0.4587	981	GO:0006352,GO:0006355	GO:0003677,GO:0003700,GO:0016987		TRUE	0.684083	0.034969	0.242246	Chromosome_I	581186	582166	981	+	10.4787	3178.51	3101.53	2354.92	2123.62	2322.65	1022.59	2147.19	3101.61	2736.92	706.301	838.124	889.244	972.123	1053.33	999.947	996.092	995.966	1043.84	990.212	1129.04	1290.2	133.51	130.662	100.196	116.62	122.422	51.0229	104.216	137.39
pgaptmp_000133	pgaptmp_000133	pssA	protein_coding	protein_coding	pgaptmp_000133	0.4265	1341	GO:0032049	GO:0008444		TRUE	-0.466852	0.0350158	0.242246	Chromosome_I	139090	140430	1341	-	12.8786	6852.73	8166.6	7984.52	7690.51	7168.66	6880.21	6017.62	5514.39	5681.45	6590.8	7102.29	6975.01	5546.99	7260.09	6758.54	10523.9	9497.63	9030.72	12201.1	9008.77	9181.8	210.568	251.683	248.52	308.952	276.41	251.134	213.663	178.693
pgaptmp_004519	pgaptmp_004519	pgaptmp_004519	protein_coding	protein_coding	pgaptmp_004519	0.4599	1146				TRUE	0.457231	0.0350548	0.242246	Chromosome_II	1394803	1395948	1146	-	6.45399	78.6341	82.731	79.2326	105.06	103.092	141.018	155.916	125.378	144.271	58.5221	65.3084	72.251	76.5915	51.0571	61.9203	84.2718	79.8904	84.6713	86.0568	94.2993	71.4472	2.82738	2.98349	2.88576	4.93874	4.65141	6.02315	6.47797	4.75417
pgaptmp_000398	pgaptmp_000398	pgaptmp_000398	protein_coding	protein_coding	pgaptmp_000398	0.5024	822				TRUE	-0.395266	0.0350778	0.242246	Chromosome_I	433510	434331	822	+	10.5272	1318.28	1079.9	1168.88	762.324	920.319	741.377	882.039	1132.88	1103.49	2054.33	2035.44	2067.49	2741.09	2845.88	2964.27	2391.63	2335.46	2688.31	943.272	1035.38	1246.17	66.0835	54.2944	59.3528	49.9611	57.8909	44.1469	51.0915	59.8893
pgaptmp_004160	pgaptmp_004160	pgaptmp_004160	protein_coding	protein_coding	pgaptmp_004160	0.423	1305				TRUE	-0.42222	0.0351187	0.242246	Chromosome_II	999859	1001163	1305	-	5.83793	52.4227	48.4064	42.4752	88.404	79.8793	89.8889	86.8675	75.3761	88.6737	38.3421	43.5389	29.6415	20.6208	34.408	15.8094	62.3611	45.2712	51.5966	145.849	101.308	109.663	1.65526	1.53297	1.35852	3.64943	3.16496	3.37154	3.16942	2.50992
pgaptmp_000958	pgaptmp_000958	pgaptmp_000958	protein_coding	protein_coding	pgaptmp_000958	0.4598	1107	GO:0000160			TRUE	0.369262	0.0351588	0.242246	Chromosome_I	1011889	1012995	1107	+	10.8226	3069.81	3887.48	4218.11	3140.9	3176.74	3066.94	4669.31	4359.87	4228.89	633.653	781.886	679.901	854.29	742.547	819.456	862.943	878.794	1005.47	2404	2704.73	2232.31	114.267	145.132	159.042	152.852	148.381	135.61	200.834	171.145
pgaptmp_001694	pgaptmp_001694	pgaptmp_001694	protein_coding	protein_coding	pgaptmp_001694	0.4107	1731	GO:0000160			TRUE	0.452869	0.0352816	0.242774	Chromosome_I	1790866	1792596	1731	-	11.1895	3764.42	4096.94	3673.29	3279.28	2748.67	2111.98	2568.16	3019.52	3060.65	1987.73	1260.81	1713.65	2820.63	3339.8	2771.92	1459.59	1339.49	1209.21	1961.42	1883.44	2151.72	89.6105	97.8148	88.5725	102.058	82.1049	59.7207	70.6411	75.8016
pgaptmp_003120	pgaptmp_003120	hslO	protein_coding	protein_coding	pgaptmp_003120	0.4566	876	GO:0006457	GO:0051082		TRUE	-0.413533	0.0354435	0.24357	Chromosome_I	3376080	3376955	876	+	12.5783	4806.7	4718.31	5007.99	4102.46	3982.36	3012.51	3913.49	4021.05	4188.78	7666.4	7397.99	7701.22	12519.8	15724.5	15701.4	7806.94	7725.4	8869.32	4752.68	4938.61	5226.45	226.1	222.599	238.616	252.292	235.061	168.329	212.713	199.468
pgaptmp_000767	pgaptmp_000767	mltA	protein_coding	protein_coding	pgaptmp_000767	0.4706	1107	GO:0009254	GO:0004553	GO:0019867	TRUE	-0.397379	0.0355428	0.243934	Chromosome_I	813717	814823	1107	+	10.8633	1530.28	1552.53	1536.46	1121.71	1341.56	1269.16	1301.53	1386.62	1411.04	2231.91	2650.43	2339.82	2515.74	2117.76	2416.21	3271.43	3129.04	3214.86	1405.41	1763.65	1807.78	56.9616	57.9606	57.9314	54.5878	62.6625	56.1181	55.9807	54.4312
pgaptmp_000821	pgaptmp_000821	map	protein_coding	protein_coding	pgaptmp_000821	0.4528	879	GO:0006508	GO:0070006		TRUE	-0.408504	0.035744	0.244995	Chromosome_I	866496	867374	879	-	13.2295	11000.3	12570.7	14028.3	10293.3	10135.1	10057.7	11695.2	11312.4	10762.6	8291.98	9420.73	9086.96	6874.09	7672.99	7807.23	6242.85	6058.35	5260.2	13700.9	14224.5	13011.7	515.672	591.034	666.125	630.856	596.189	560.068	633.506	559.246
pgaptmp_002083	pgaptmp_002083	katG	protein_coding	protein_coding	pgaptmp_002083	0.4993	2181	GO:0006979	GO:0004096,GO:0004601,GO:0020037		TRUE	0.419866	0.0358296	0.245115	Chromosome_I	2254180	2256360	2181	+	6.34721	78.6341	92.4123	111.089	90.9664	87.3894	98.1356	105.429	99.2576	78.8211	42.3781	68.9366	77.8088	83.9561	106.554	59.2854	74.1592	69.2383	105.839	79.9099	69.4501	54.0008	1.48564	1.75112	2.12597	2.24693	2.0718	2.20244	2.30164	1.97763
pgaptmp_004586	pgaptmp_004586	pgaptmp_004586	protein_coding	protein_coding	pgaptmp_004586	0.4635	2235				TRUE	0.385021	0.0359092	0.245115	Chromosome_II	1475917	1478151	2235	+	6.51353	82.4887	107.374	115.173	153.746	144.056	117.103	151.461	152.991	159.05	56.5041	63.4943	79.6614	36.8228	73.2558	80.3647	75.8446	46.6027	47.6276	110.644	115.325	89.7244	1.52081	1.98547	2.15087	3.70587	3.33271	2.56462	3.22669	2.97458
pgaptmp_004605	pgaptmp_004605	pgaptmp_004605	protein_coding	protein_coding	pgaptmp_004605	0.4279	222	GO:0006310	GO:0003677		TRUE	0.532076	0.0359191	0.245115	Chromosome_II	1498749	1498970	222	+	6.44323	51.6518	78.3304	62.0791	98.6537	112.65	155.862	102.459	73.1372	99.2301	80.7201	61.6801	85.2192	73.6457	86.575	75.0949	111.239	109.183	93.9322	97.233	86.6534	66.4625	9.58718	14.5821	11.6717	23.94	26.2376	34.3654	21.9751	14.316
pgaptmp_004057	pgaptmp_004057	pgaptmp_004057	protein_coding	protein_coding	pgaptmp_004057	0.4695	1425	GO:0055085	GO:0015562		TRUE	0.334228	0.0359478	0.245115	Chromosome_II	827232	828656	1425	-	5.62389	26.9823	46.6462	57.995	55.0923	60.0802	61.0255	63.1089	58.9575	71.7835	24.216	56.2378	46.3148	55.9707	36.6279	43.476	48.8776	46.6027	47.6276	47.4989	44.601	44.8622	0.780229	1.35283	1.6987	2.08277	2.18002	2.09618	2.10867	1.79788
pgaptmp_004627	pgaptmp_004627	pgaptmp_004627	protein_coding	protein_coding	pgaptmp_004627	0.4292	1752				TRUE	0.378445	0.0360099	0.245221	Chromosome_II	1534391	1536142	1752	-	9.29497	682.267	734.017	628.96	793.073	923.733	676.228	720.926	772.418	758.653	665.941	692.994	709.542	466.914	648.203	466.379	446.64	464.696	377.052	669.455	553.053	628.902	16.0464	17.3147	14.9841	24.3862	27.2619	18.8926	19.5925	19.1583
pgaptmp_005190	pgaptmp_005190	pgaptmp_005190	protein_coding	protein_coding	pgaptmp_005190	0.4676	1482				TRUE	-0.329388	0.0360936	0.245474	Chromosome_II	2160058	2161539	1482	+	7.64425	91.7398	101.213	111.089	149.262	144.056	126.174	98.0044	125.378	151.308	300.683	284.817	257.51	424.199	430.655	490.093	291.58	371.49	293.704	191.113	162.475	184.433	2.55075	2.82248	3.1287	5.42581	5.02605	4.16731	3.14869	3.6763
pgaptmp_001383	pgaptmp_001383	pgaptmp_001383	protein_coding	protein_coding	pgaptmp_001383	0.3805	615				TRUE	0.580562	0.0361846	0.245553	Chromosome_I	1444577	1445191	615	+	8.58042	493.391	603.76	655.915	470.847	473.814	628.397	499.674	415.688	516.559	369.295	339.241	339.024	294.583	270.824	163.364	343.829	348.855	209.032	449.283	360.631	249.234	33.0578	40.5724	44.5157	41.2448	39.8361	50.0141	38.6851	29.3717
pgaptmp_004845	pgaptmp_004845	pgaptmp_004845	protein_coding	protein_coding	pgaptmp_004845	0.4372	915	GO:0000160,GO:0006935	GO:0000156		TRUE	-0.416683	0.0362255	0.245553	Chromosome_II	1770267	1771181	915	+	11.5563	7677.62	8596.1	8419.89	6719.98	6007.34	5037.08	13214.3	11791.5	11460	895.994	950.6	848.487	639.245	759.196	781.25	881.483	655.101	689.277	8078.72	7977.85	7896.58	345.751	388.259	384.084	395.65	339.473	269.457	687.629	559.997
pgaptmp_004376	pgaptmp_004376	modB	protein_coding	protein_coding	pgaptmp_004376	0.4435	690	GO:0015689	GO:0015098	GO:0016020	TRUE	0.391292	0.0362452	0.245553	Chromosome_II	1241031	1241720	690	-	9.94049	1324.45	1473.32	1460.49	1754.63	1789.43	1556.97	2080.37	2541.14	2088.76	508.537	536.98	548.367	608.313	471.723	409.728	466.866	451.38	539.78	1091.36	1430.42	1402.36	79.0939	88.2446	88.3469	136.993	134.094	110.45	143.557	160.036
pgaptmp_002569	pgaptmp_002569	lipA	protein_coding	protein_coding	pgaptmp_002569	0.47	966	GO:0009107	GO:0016992,GO:0051539,GO:1904047		TRUE	-0.574115	0.0362997	0.245606	Chromosome_I	2772070	2773035	966	+	11.7038	3096.03	3171.06	2336.14	2565	2571.16	1443.99	1789.32	2368	2511.01	5151.96	5222.86	5072.39	6168.56	7330.02	7307.92	2754	3227.57	2974.08	3142.75	2877.4	3847.35	132.064	135.665	100.94	143.045	137.624	73.168	88.195	106.523
pgaptmp_001811	pgaptmp_001811	tssK	protein_coding	protein_coding	pgaptmp_001811	0.4797	1332	GO:0033103	GO:0003674		TRUE	0.408391	0.036425	0.245763	Chromosome_I	1935950	1937281	1332	+	4.82305	40.088	44.886	46.5594	33.9523	36.1847	47.0061	39.3502	38.0612	33.0767	20.18	18.1412	20.3785	16.2021	23.3087	18.4444	11.798	19.9726	21.1678	28.4993	27.3978	28.2466	1.24013	1.39267	1.45896	1.37318	1.40464	1.72736	1.40662	1.2417
pgaptmp_003678	pgaptmp_003678	pgaptmp_003678	protein_coding	protein_coding	pgaptmp_003678	0.4853	1257	GO:0009401			TRUE	0.414686	0.0364511	0.245763	Chromosome_II	434951	436207	1257	-	10.2873	4193.82	3648.08	3192.17	1807.16	2171.08	2002.3	2209.55	2998.62	2498.35	345.079	847.195	574.303	469.859	270.824	325.411	615.184	615.156	1878.64	1237.21	1659.79	1632.49	137.478	119.942	105.997	77.4506	89.3068	77.9697	83.6955	103.663
pgaptmp_001308	pgaptmp_001308	pgaptmp_001308	protein_coding	protein_coding	pgaptmp_001308	0.3919	273				TRUE	0.534763	0.0364629	0.245763	Chromosome_I	1385216	1385488	273	+	6.72837	173.458	149.62	147.846	181.292	137.911	145.966	117.308	134.334	139.344	82.7381	85.2637	87.0718	101.631	81.0254	65.8727	69.1029	71.9013	48.9506	93.3213	82.8305	143.725	26.1812	22.65	22.6042	35.7751	26.1205	26.1712	20.4597	21.3825
pgaptmp_003584	pgaptmp_003584	pgaptmp_003584	protein_coding	protein_coding		0.5	1000				TRUE	-1.40929	0.0365679	0.24597	pgaptmp_003584	1	1000	1000	+	9.87136	576.65	445.339	606.905	356.819	632.89	465.113	555.358	586.59	257.576	2365.1	518.839	2271.28	209.154	2498.47	2658.62	3889.99	3149.01	3938.54	2554.88	990.142	377.175	23.7613	18.4049	25.3316	19.2226	32.7244	22.7662	26.4427	25.4901
pgaptmp_001483	pgaptmp_001483	pgaptmp_001483	protein_coding	protein_coding	pgaptmp_001483	0.481	1212	GO:0055085	GO:0022857	GO:0005886,GO:0016020	TRUE	0.326191	0.0365872	0.24597	Chromosome_I	1532928	1534139	1212	-	7.88789	286.783	307.161	347.97	224.854	237.59	256.472	296.24	261.951	244.205	207.854	268.49	205.638	297.529	286.364	288.522	165.173	169.101	150.821	196.142	198.793	181.11	9.75011	10.4738	11.9834	9.99451	10.1361	10.3579	11.6379	9.39191
pgaptmp_002449	pgaptmp_002449	asnB	protein_coding	protein_coding	pgaptmp_002449	0.4595	1665	GO:0006529	GO:0004066		TRUE	0.350154	0.0368155	0.246999	Chromosome_I	2666454	2668118	1665	+	10.9381	2720.59	2841.9	2706.98	2213.3	2218.19	2252.17	2046.95	2369.5	2289.33	1515.52	1627.27	1543.21	1646.72	1844.71	1698.2	1739.37	1766.91	1629.92	1614.96	1861.77	1824.4	67.3297	70.5401	67.8596	71.6128	68.8855	66.2094	58.5365	61.8414
pgaptmp_004850	pgaptmp_004850	pgaptmp_004850	protein_coding	protein_coding	pgaptmp_004850	0.4622	753	GO:0006810	GO:0015291		TRUE	-0.655166	0.036834	0.246999	Chromosome_II	1774563	1775315	753	+	7.9193	269.052	238.512	240.148	465.722	513.413	272.141	322.226	429.868	392.698	183.638	145.13	150.06	73.6457	124.313	100.126	170.229	103.857	108.485	519.693	583.636	892.259	14.7231	13.0905	13.3115	33.3193	35.2546	17.6901	20.3751	24.8072
pgaptmp_002789	pgaptmp_002789	srmB	protein_coding	protein_coding	pgaptmp_002789	0.4812	1224	GO:0000027	GO:0003724		TRUE	-0.438375	0.0369011	0.247134	Chromosome_I	3021501	3022724	1224	+	12.651	6646.12	6646.64	6232.42	5553.44	5893.32	4150.56	4890.57	5494.99	5206.41	7811.69	8976.27	8271.82	5984.45	7498.73	7350.08	7195.12	6400.55	5727.22	7063.92	6579.92	7668.11	223.741	224.421	212.528	244.424	248.956	165.981	190.244	195.085
pgaptmp_003420	pgaptmp_003420	pgaptmp_003420	protein_coding	protein_coding	pgaptmp_003420	0.4816	708				TRUE	-0.357503	0.0370598	0.247755	Chromosome_II	169180	169887	708	+	10.3352	1289.75	1105.43	1288.14	690.576	912.126	752.922	1144.87	1256.02	1115.46	2102.76	2548.84	2458.39	1310.89	1243.13	1358.29	1505.09	1521.91	2165.73	986.859	1037.29	1027.68	75.064	64.5265	75.9402	52.5463	66.614	52.0535	76.9937	77.0904
pgaptmp_004356	pgaptmp_004356	pgaptmp_004356	protein_coding	protein_coding	pgaptmp_004356	0.423	435				TRUE	0.749611	0.0370879	0.247755	Chromosome_II	1221679	1222113	435	+	5.19471	9.25107	25.5234	14.703	83.2791	62.1284	59.3761	25.986	29.8519	29.5579	34.3061	21.7695	38.9044	36.8228	42.1776	30.3014	70.7883	82.5534	43.6586	58.6751	35.0437	19.9388	0.876317	2.42488	1.41077	10.3136	7.3849	6.68122	2.84435	2.98209
pgaptmp_005054	pgaptmp_005054	dgcA	protein_coding	protein_coding	pgaptmp_005054	0.4975	987		GO:0016855		TRUE	0.354889	0.0373099	0.248865	Chromosome_II	2018360	2019346	987	+	6.51145	75.5504	83.6111	61.2623	132.606	152.249	106.382	80.1854	109.706	88.6737	86.7742	59.866	44.4622	101.631	94.3446	93.5392	74.1592	95.8684	115.1	100.586	101.308	102.186	3.15412	3.50097	2.5907	7.23786	7.97591	5.27576	3.86822	4.83003
pgaptmp_004209	pgaptmp_004209	rarD	protein_coding	protein_coding	pgaptmp_004209	0.4227	906	GO:0006810	GO:0005215	GO:0005886	TRUE	0.425493	0.0373486	0.248865	Chromosome_II	1059643	1060548	906	+	9.50743	437.884	512.228	517.054	719.403	811.083	968.161	691.228	609.725	556.674	744.643	910.689	944.821	885.221	769.186	844.488	913.506	1003.96	975.043	648.779	684.307	546.654	19.9154	23.3656	23.8204	42.7768	46.2893	52.3061	36.3267	29.2445
pgaptmp_003000	pgaptmp_003000	priA	protein_coding	protein_coding	pgaptmp_003000	0.4764	2202				TRUE	-0.349373	0.0374692	0.249212	Chromosome_I	3246429	3248630	2202	+	11.1078	2584.9	2425.6	2407.2	1641.24	1598.95	1476.98	1830.9	1918.73	1931.12	2415.55	2059.03	2276.83	2789.7	3355.34	3491.25	2336.01	2260.9	2558.66	1891.57	1961.81	2228.16	48.371	45.5244	45.6285	40.1531	37.5459	32.8315	39.5895	37.8647
pgaptmp_004783	pgaptmp_004783	pgaptmp_004783	protein_coding	protein_coding	pgaptmp_004783	0.4704	744	GO:0006865		GO:0016020,GO:1902495	TRUE	0.334275	0.0374983	0.249212	Chromosome_II	1708584	1709327	744	+	7.2889	107.158	146.099	121.708	187.058	210.963	202.868	183.387	197.769	205.498	106.954	168.713	148.207	164.966	190.909	205.523	96.0698	114.51	120.392	141.938	174.581	161.172	5.93487	8.11553	6.82789	13.5446	14.6615	13.3467	11.7362	11.5511
pgaptmp_005159	pgaptmp_005159	yidZ	protein_coding	protein_coding	pgaptmp_005159	0.452	969	GO:0006355	GO:0003700		TRUE	-0.390198	0.0375427	0.249212	Chromosome_II	2125731	2126699	969	+	8.15994	259.801	280.757	214.01	245.994	221.887	163.284	253.92	240.308	268.132	302.701	257.605	279.741	543.505	642.653	611.299	257.872	246.329	239.461	272.699	288.632	279.973	11.0478	11.9743	9.21829	13.6762	11.84	8.24809	12.4769	10.7766
pgaptmp_004013	pgaptmp_004013	pgaptmp_004013	protein_coding	protein_coding	pgaptmp_004013	0.4822	1209		GO:0016747		TRUE	0.40459	0.037599	0.249271	Chromosome_II	781184	782392	1209	+	5.20702	37.0043	30.8041	29.4059	35.2335	34.1365	29.6881	23.7586	44.0316	41.5218	58.5221	50.7954	33.3466	42.7145	73.2558	55.3331	30.3378	41.2767	31.7517	18.4407	26.7606	25.7542	1.2612	1.05299	1.01519	1.56998	1.45994	1.20196	0.935681	1.58262
pgaptmp_004610	pgaptmp_004610	pgaptmp_004610	protein_coding	protein_coding	pgaptmp_004610	0.4704	3378				TRUE	0.426785	0.0376871	0.249372	Chromosome_II	1507690	1511067	3378	-	11.2473	1958.91	1471.56	1686.76	1155.02	1514.29	1164.43	1558.42	1990.38	1881.15	3456.84	3956.6	2908.57	7221.7	7102.48	5479.29	6182.18	6686.82	5471.88	837.098	894.569	1140.66	23.8954	18.0036	20.8417	18.4201	23.179	16.8728	21.9663	25.6043
pgaptmp_004608	pgaptmp_004608	pgaptmp_004608	protein_coding	protein_coding	pgaptmp_004608	0.4509	1131				TRUE	0.433614	0.0377146	0.249372	Chromosome_II	1500121	1501251	1131	-	9.72762	793.28	691.772	812.747	823.823	901.203	643.242	882.782	1097.06	1073.94	746.661	845.381	778.088	951.502	1218.71	957.789	1073.62	1059.88	1123.22	476.106	640.343	646.348	28.9016	25.278	29.9939	39.2406	41.2006	27.8384	37.1641	42.1507
pgaptmp_000649	pgaptmp_000649	pgaptmp_000649	protein_coding	protein_coding	pgaptmp_000649	0.4776	984		GO:0005524,GO:0016887,GO:0042626,GO:0140359		TRUE	0.437587	0.0377564	0.249372	Chromosome_I	666006	666989	984	-	6.56646	143.392	125.857	123.341	74.9512	84.6584	75.8695	85.3826	105.228	85.8587	70.6301	108.847	83.3666	144.346	128.753	168.634	85.9572	94.5369	111.131	56.4398	70.0873	43.2006	6.00464	5.28595	5.23185	4.10344	4.44856	3.77403	4.13149	4.64701
pgaptmp_001343	pgaptmp_001343	pgaptmp_001343	protein_coding	protein_coding	pgaptmp_001343	0.4113	834				TRUE	0.454621	0.0378473	0.24966	Chromosome_I	1416276	1417109	834	+	8.2859	422.466	404.854	321.015	390.131	406.224	263.069	389.79	416.434	483.483	334.989	217.695	279.741	393.268	399.577	287.205	193.825	243.666	170.666	221.848	252.314	299.912	20.8729	20.062	16.0657	25.2004	25.1851	15.4396	22.2535	21.6979
pgaptmp_000819	pgaptmp_000819	pgaptmp_000819	protein_coding	protein_coding	pgaptmp_000819	0.4583	384				TRUE	0.448108	0.0378992	0.249689	Chromosome_I	863232	863615	384	-	10.2831	2498.56	2735.4	3179.11	1795.63	1643.33	2325.57	2585.24	2232.18	2221.77	581.185	624.058	502.052	679.013	544.979	562.553	822.493	817.545	701.184	1384.73	1514.52	1386.57	268.112	294.396	345.553	251.912	221.278	296.435	320.554	252.601
pgaptmp_004705	pgaptmp_004705	pgaptmp_004705	protein_coding	protein_coding	pgaptmp_004705	0.4469	405				TRUE	0.512856	0.0382619	0.251763	Chromosome_II	1621847	1622251	405	-	6.07157	80.176	81.8509	91.4851	74.3106	83.9757	117.103	155.174	126.124	127.38	34.3061	38.0966	31.494	82.4832	42.1776	36.8887	42.1359	59.9178	47.6276	50.8517	70.7245	68.1241	8.15732	8.35237	9.42836	9.88462	10.7212	14.1529	18.243	13.5326
pgaptmp_001017	pgaptmp_001017	pgaptmp_001017	protein_coding	protein_coding	pgaptmp_001017	0.4476	630				TRUE	-0.457862	0.0385252	0.252788	Chromosome_I	1078213	1078842	630	+	11.3458	2190.96	2531.22	2604.87	2147.96	2058.43	2770.89	2011.32	1567.97	1728.43	2932.16	2824.59	2771.48	2894.28	3021.25	3084.16	2951.2	3131.7	2819.29	3597.62	3261.61	2875.33	143.302	166.047	172.579	183.675	168.943	215.284	152.01	108.152
pgaptmp_001895	pgaptmp_001895	pgaptmp_001895	protein_coding	protein_coding	pgaptmp_001895	0.4592	882		GO:0051539,GO:1904047		TRUE	0.318972	0.0385486	0.252788	Chromosome_I	2035977	2036858	882	-	9.23326	1024.56	927.643	807.029	586.157	598.754	489.853	637.771	674.653	672.794	433.871	491.627	503.905	453.657	488.372	523.029	701.141	680.4	1088.82	454.871	445.373	451.114	47.8658	43.4664	38.191	35.8022	35.1013	27.185	34.4293	33.2391
pgaptmp_003144	pgaptmp_003144	pgaptmp_003144	protein_coding	protein_coding	pgaptmp_003144	0.4745	765		GO:0016787,GO:0046872		TRUE	-0.470204	0.0385616	0.252788	Chromosome_I	3407534	3408298	765	+	9.95894	1312.11	1166.15	1098.64	917.351	1013.85	667.157	844.174	953.022	1008.49	1049.36	1035.86	1028.19	969.177	1071.09	1109.3	667.432	848.169	833.483	995.241	1221.43	1418.14	70.6752	62.9994	59.9424	64.6009	68.5263	42.6874	52.5416	54.1351
pgaptmp_000977	pgaptmp_000977	pgaptmp_000977	protein_coding	protein_coding	pgaptmp_000977	0.4105	285		GO:0004497		TRUE	-0.617804	0.0387914	0.253978	Chromosome_I	1034065	1034349	285	-	11.0714	2306.6	2811.97	2053.51	2687.35	1439.88	2158.16	2275.63	1126.91	1646.09	1943.34	1400.5	1545.06	1045.77	1741.49	1669.21	4161.34	3030.51	3759.93	3667.47	2635.28	3508.39	333.492	407.763	300.742	507.977	261.231	370.656	380.181	171.823
pgaptmp_004392	pgaptmp_004392	pgaptmp_004392	protein_coding	protein_coding	pgaptmp_004392	0.3973	219				TRUE	0.545771	0.0389413	0.254642	Chromosome_II	1256875	1257093	219	-	6.30324	57.8192	67.769	59.6287	106.341	82.6103	116.278	92.8072	52.9871	87.9699	104.936	58.0519	88.9244	85.429	63.2664	63.2378	92.699	85.2164	120.392	91.0861	60.5299	53.17	10.8789	12.7888	11.3645	26.159	19.5045	25.9889	20.1776	10.5139
pgaptmp_001986	pgaptmp_001986	pgaptmp_001986	protein_coding	protein_coding	pgaptmp_001986	0.4473	1044		GO:0051536		TRUE	0.608685	0.0390121	0.254789	Chromosome_I	2148455	2149498	1044	+	7.159	385.461	321.243	247.5	258.806	307.228	137.72	141.809	258.219	235.759	115.026	107.033	101.893	69.2269	78.8055	67.1901	62.3611	86.5479	60.8575	136.908	143.36	176.956	15.2138	12.7167	9.89499	13.3548	15.2161	6.45696	6.46751	10.7479
pgaptmp_004358	pgaptmp_004358	pgaptmp_004358	protein_coding	protein_coding	pgaptmp_004358	0.3638	492				TRUE	0.500372	0.0390971	0.254952	Chromosome_II	1222994	1223485	492	-	7.88313	203.524	227.95	224.628	492.628	417.148	506.347	345.985	216.426	292.764	189.692	150.572	116.713	151.71	193.129	123.841	203.938	205.052	145.529	439.225	299.464	269.173	17.0454	19.1477	19.0564	53.9409	43.8398	50.3751	33.4831	19.1154
pgaptmp_002387	pgaptmp_002387	pgaptmp_002387	protein_coding	protein_coding	pgaptmp_002387	0.4381	630				TRUE	-0.383131	0.0391339	0.254952	Chromosome_I	2598657	2599286	630	+	8.97095	559.69	482.304	459.059	324.148	368.674	283.686	298.468	338.073	397.624	649.797	680.296	707.69	773.28	735.888	708.79	593.273	673.742	742.197	416.872	370.826	504.284	36.6071	31.6389	30.4137	27.7183	30.2584	22.0409	22.5574	23.3189
pgaptmp_000512	pgaptmp_000512	proC	protein_coding	protein_coding	pgaptmp_000512	0.4908	819	GO:0006561	GO:0004735		TRUE	-0.363027	0.0394218	0.25651	Chromosome_I	521541	522359	819	-	10.3702	1100.88	1093.11	1164.8	729.013	787.87	591.287	805.566	938.096	952.187	2161.28	2026.37	2143.45	2562.87	3010.15	3123.68	1508.46	1812.18	2205.42	834.862	914.321	991.953	55.3877	55.1594	59.362	47.9529	49.741	35.3384	46.8328	49.7738
pgaptmp_003861	pgaptmp_003861	pgaptmp_003861	protein_coding	protein_coding	pgaptmp_003861	0.4432	1356				TRUE	-0.352268	0.0395646	0.256712	Chromosome_II	627466	628821	1356	+	6.47227	37.7752	56.3275	53.9108	78.1542	81.2448	95.6616	80.1854	82.0928	93.6	110.99	76.1931	131.534	145.818	105.444	133.063	62.3611	85.2164	88.6403	117.909	105.131	112.155	1.1479	1.71673	1.65942	3.10497	3.09799	3.45311	2.81558	2.63077
pgaptmp_000023	pgaptmp_000023	pgaptmp_000023	protein_coding	protein_coding		0.5	1000				TRUE	-1.37123	0.0396284	0.256712	pgaptmp_000023	1	1000	1000	+	9.88025	574.337	438.298	629.777	352.975	658.834	512.119	581.344	579.873	266.021	2340.88	531.538	2282.39	188.533	2543.97	2682.34	3783.8	2977.25	3839.31	2582.26	1026.46	392.96	23.666	18.1139	26.2862	19.0155	34.0659	25.0671	27.68	25.1983
pgaptmp_005024	pgaptmp_005024	pgaptmp_005024	protein_coding	protein_coding	pgaptmp_005024	0.4578	1470				TRUE	0.440224	0.0397039	0.256712	Chromosome_II	1980843	1982312	1470	+	13.1531	6960.66	6908.04	5480.93	8071.67	8573.72	10048.6	13600.3	14408	11196.1	7119.52	6904.55	7673.43	9170.36	7378.86	7185.39	16817.3	11371.1	34311.7	5969.77	7219.63	6745.11	195.115	194.213	155.625	295.808	301.575	334.596	440.519	425.917
pgaptmp_000615	pgaptmp_000615	pdhR	protein_coding	protein_coding	pgaptmp_000615	0.4583	768				TRUE	-0.508202	0.0397142	0.256712	Chromosome_I	619052	619819	768	+	13.9172	11255.5	10359	9931.03	4666.19	6396.49	6988.24	6169.82	7383.12	6568.19	43891.6	46096.8	52567.3	40148.7	38674.6	41191.5	31947.4	31455.5	30026.6	8654.85	7561.78	9799.07	603.894	557.439	539.727	327.315	430.65	445.389	382.511	417.75
pgaptmp_000071	pgaptmp_000071	pgaptmp_000071	protein_coding	protein_coding	pgaptmp_000071	0.4745	2529				TRUE	-0.454184	0.0397331	0.256712	Chromosome_I	78052	80580	2529	+	13.6676	12091.2	13344.3	13427.9	9462.43	11560.7	11838.9	11561.5	12331.8	12008.2	12683.2	13727.5	15144.9	18007.8	14335.9	15534.1	11683.4	11878.4	10291.5	16392.7	15623.7	13542.6	197.005	218.067	221.615	201.566	236.362	229.138	217.671	211.893
pgaptmp_004518	pgaptmp_004518	pgaptmp_004518	protein_coding	protein_coding	pgaptmp_004518	0.4539	846				TRUE	0.350859	0.0397454	0.256712	Chromosome_II	1393667	1394512	846	-	7.39804	151.101	185.705	222.178	247.275	213.012	245.751	287.331	316.43	250.538	94.8462	125.174	133.387	81.0103	106.554	109.349	146.633	143.803	140.237	204.525	182.864	168.649	7.35961	9.07181	10.9615	15.7461	13.019	14.2186	16.1713	16.2534
pgaptmp_003959	pgaptmp_003959	pgaptmp_003959	protein_coding	protein_coding	pgaptmp_003959	0.43	600		GO:0015035		TRUE	0.338758	0.0398512	0.257079	Chromosome_II	727110	727709	600	+	9.26646	763.984	806.187	889.529	1231.89	1106.7	1048.98	1117.4	1081.39	1130.24	405.619	388.222	346.435	296.056	347.41	329.363	303.378	262.307	317.517	843.245	951.276	909.706	52.4676	55.5298	61.8799	110.608	95.3727	85.5752	88.6726	78.3189
pgaptmp_000452	pgaptmp_000452	pgaptmp_000452	protein_coding	protein_coding	pgaptmp_000452	0.4157	1251				TRUE	-0.334399	0.0399262	0.257248	Chromosome_I	486432	487682	1251	+	11.2181	3397.46	3745.78	3978.78	2604.07	2711.12	2526.78	3001.75	2903.1	2961.42	1664.85	1616.38	1769.22	1528.88	1563.9	1756.17	1682.06	1628.43	1733.12	3348.95	3435.55	3215.12	111.906	123.745	132.75	112.14	112.056	98.8653	114.249	100.842
pgaptmp_004214	pgaptmp_004214	ccoN	protein_coding	protein_coding	pgaptmp_004214	0.4723	1410		GO:0004129		TRUE	0.378718	0.0400476	0.257291	Chromosome_II	1064756	1066165	1410	-	6.02079	42.4008	36.0848	49.8267	58.936	44.3774	55.2528	65.3362	51.4946	64.0421	80.7201	90.7061	38.9044	151.71	73.2558	94.8567	99.4407	173.096	105.839	40.2343	39.5038	39.0467	1.23912	1.05766	1.47497	2.25178	1.62737	1.91809	2.20632	1.58701
pgaptmp_003353	pgaptmp_003353	pgaptmp_003353	protein_coding	protein_coding	pgaptmp_003353	0.3853	693	GO:0006355	GO:0003700,GO:0043565		TRUE	0.464236	0.0400634	0.257291	Chromosome_II	89114	89806	693	-	4.85632	18.5021	21.1228	18.7871	42.9208	45.7429	61.0255	34.8955	30.5982	52.782	32.2881	23.5836	22.2311	16.2021	16.649	19.7618	21.9107	29.2931	19.8448	41.9108	31.8579	29.9081	1.10014	1.25968	1.13153	3.33656	3.41298	4.31033	2.39756	1.91867
pgaptmp_002761	pgaptmp_002761	ispH	protein_coding	protein_coding	pgaptmp_002761	0.472	966	GO:0019288,GO:0050992	GO:0046872,GO:0051745		TRUE	-0.414097	0.0400795	0.257291	Chromosome_I	2989600	2990565	966	-	10.8987	1848.67	1710.95	1588.74	1247.91	1167.47	1095.98	1088.44	1235.12	1170.35	2730.36	2548.84	2947.47	3449.56	3328.7	3230.4	2477.59	2896.03	2976.73	1297.56	1548.93	1892.52	78.8572	73.1983	68.646	69.5935	62.4901	55.5341	53.6489	55.5611
pgaptmp_004563	pgaptmp_004563	pgaptmp_004563	protein_coding	protein_coding	pgaptmp_004563	0.4641	627				TRUE	0.331682	0.0402837	0.258218	Chromosome_II	1447318	1447944	627	-	6.10627	57.0483	62.4883	90.6682	112.106	104.458	94.8369	74.9882	77.615	85.1549	56.5041	48.9813	29.6415	42.7145	54.3869	48.7458	82.5863	50.5972	76.7334	83.8215	87.9277	73.9395	3.74915	4.11882	6.03571	9.63224	8.61423	7.40359	5.69453	5.37917
pgaptmp_002653	pgaptmp_002653	pgaptmp_002653	protein_coding	protein_coding	pgaptmp_002653	0.4653	576	GO:0055085			TRUE	-0.374649	0.040322	0.258218	Chromosome_I	2872003	2872578	576	+	8.9112	625.218	806.187	808.663	643.812	663.613	715.812	722.411	649.279	684.054	286.557	239.464	322.351	188.533	192.019	238.459	370.796	351.518	300.319	1025.42	847.419	788.412	44.7268	57.8436	58.5984	60.2144	59.5712	60.8288	59.7165	48.9831
pgaptmp_004186	pgaptmp_004186	pgaptmp_004186	protein_coding	protein_coding	pgaptmp_004186	0.4833	1200	GO:0055085	GO:0022857		TRUE	0.413528	0.0405205	0.259132	Chromosome_II	1027345	1028544	1200	-	6.60329	59.3611	66.0088	61.2623	137.09	111.285	131.122	89.0949	78.3613	84.4511	115.026	183.226	85.2192	139.927	104.334	125.158	80.9009	103.857	68.7954	81.0275	88.5649	114.648	2.03835	2.27333	2.13085	6.15445	4.79511	5.34845	3.53512	2.83764
pgaptmp_003229	pgaptmp_003229	ccoG	protein_coding	protein_coding	pgaptmp_003229	0.4578	1422	GO:0008535		GO:0016020	TRUE	0.409228	0.0405632	0.259132	Chromosome_I	3495725	3497146	1422	+	10.568	1401.54	1719.75	1901.58	1936.56	1913.69	2276.91	2078.14	1823.95	1803.03	976.714	1088.47	818.845	898.477	906.818	820.774	2368.04	1947.99	2399.9	1744.05	1589.07	1337.56	40.6128	49.9812	55.8157	73.3661	69.5851	78.3753	69.5837	55.738
pgaptmp_005082	pgaptmp_005082	pgaptmp_005082	protein_coding	protein_coding	pgaptmp_005082	0.4664	894	GO:0055085	GO:0022857	GO:0016020	TRUE	0.298823	0.0406767	0.259317	Chromosome_II	2042772	2043665	894	+	8.0149	173.458	161.061	206.658	286.352	327.027	293.582	302.18	252.995	277.281	240.142	317.471	240.837	250.395	227.537	202.888	367.425	327.55	330.747	239.73	258.686	242.588	7.99492	7.44553	9.64842	17.2555	18.9143	16.074	16.0939	12.2974
pgaptmp_002390	pgaptmp_002390	pgaptmp_002390	protein_coding	protein_coding	pgaptmp_002390	0.4891	1188				TRUE	-0.357576	0.0407256	0.259317	Chromosome_I	2602230	2603417	1188	+	11.2246	1518.72	1791.92	1788.86	1192.17	1285.58	1081.97	1339.39	1152.28	1266.06	4080.4	3058.61	3345.78	7815.28	10037.2	10614.7	2920.86	3568.44	4380.42	1740.13	1392.19	1478.79	52.6767	62.3366	62.8493	54.0614	55.9534	44.5789	53.6815	42.1483
pgaptmp_004577	pgaptmp_004577	pgaptmp_004577	protein_coding	protein_coding	pgaptmp_004577	0.4218	2271				TRUE	0.338417	0.0408058	0.259317	Chromosome_II	1465550	1467820	2271	+	8.01067	277.532	345.886	378.193	467.004	462.208	446.146	497.446	459.719	498.262	173.548	123.36	138.944	97.2123	134.302	139.65	178.656	182.416	117.746	408.49	367.64	319.02	5.03564	6.29444	6.95083	11.0782	10.5236	9.61595	10.4295	8.79657
pgaptmp_003318	pgaptmp_003318	pgaptmp_003318	protein_coding	protein_coding	pgaptmp_003318	0.4492	354				TRUE	0.423508	0.0408431	0.259317	Chromosome_II	54459	54812	354	+	7.57576	123.348	140.819	115.173	295.321	230.08	323.27	213.085	178.365	225.203	226.016	201.367	244.542	153.183	134.302	144.92	207.309	185.079	153.467	228.553	221.094	186.926	14.3577	16.4399	13.5797	44.9422	33.6062	44.6987	28.6604	21.895
pgaptmp_001973	pgaptmp_001973	pgaptmp_001973	protein_coding	protein_coding	pgaptmp_001973	0.4305	597	GO:0000160			TRUE	0.376559	0.0408927	0.259317	Chromosome_I	2132718	2133314	597	-	5.93981	177.312	195.386	200.124	121.716	114.699	87.4149	106.914	129.11	115.417	30.2701	21.7695	29.6415	32.4041	21.0888	14.492	20.2252	22.6356	33.0747	73.7629	90.4763	83.0781	12.2383	13.5257	13.9915	10.9834	9.93408	7.1671	8.52692	9.3977
pgaptmp_004469	pgaptmp_004469	pgaptmp_004469	protein_coding	protein_coding	pgaptmp_004469	0.4845	291				TRUE	0.527408	0.0409125	0.259317	Chromosome_II	1339253	1339543	291	-	4.04073	14.6475	17.6023	13.8861	14.0934	24.5783	14.844	22.2737	19.4037	27.4466	14.126	16.3271	12.9681	16.2021	16.649	26.3491	1.68544	30.6246	26.4598	6.70572	10.8317	14.1233	2.0741	2.49988	1.99172	2.60908	4.36719	2.49685	3.64445	2.89754
pgaptmp_002255	pgaptmp_002255	dinG	protein_coding	protein_coding	pgaptmp_002255	0.4494	2076	GO:0006139	GO:0003677,GO:0003678,GO:0005524,GO:0016818		TRUE	-0.363188	0.0409758	0.259317	Chromosome_I	2444886	2446961	2076	+	10.9315	2124.66	1957.38	2042.89	1262	1540.24	1273.29	1424.78	1367.22	1526.45	2607.26	2811.89	2712.19	2698.38	2829.23	2661.26	2118.59	1967.97	2193.52	1661.34	1653.42	1983.91	42.1717	38.9663	41.0733	32.7488	38.3623	30.0215	32.6777	28.6186
pgaptmp_002877	pgaptmp_002877	pgaptmp_002877	protein_coding	protein_coding	pgaptmp_002877	0.4685	1221	GO:0001680	GO:0003723,GO:0004810,GO:0005524		TRUE	-0.584752	0.0409863	0.259317	Chromosome_I	3130020	3131240	1221	+	10.2818	1783.14	1630.86	1484.18	1158.22	1248.03	679.527	1200.55	1490.36	1465.93	1105.87	1130.2	1111.55	1387.48	1447.36	1483.45	768.559	876.131	878.465	1214.29	1578.88	1872.58	60.1768	55.2003	50.7355	51.1022	52.851	27.241	46.8165	53.041
pgaptmp_003799	pgaptmp_003799	pgaptmp_003799	protein_coding	protein_coding	pgaptmp_003799	0.4089	450		GO:0016787		TRUE	0.381108	0.0410628	0.259489	Chromosome_II	555755	556204	450	+	6.49851	63.9866	86.2515	111.089	131.965	116.064	113.804	155.174	115.676	118.935	56.5041	85.2637	55.5777	103.104	79.9154	75.0949	79.2155	58.5863	71.4414	102.821	98.1222	74.7703	5.85915	7.92128	10.3038	15.7983	13.3361	12.3788	16.4187	11.1704
pgaptmp_000951	pgaptmp_000951	truA	protein_coding	protein_coding	pgaptmp_000951	0.4679	795	GO:0001522,GO:0009451	GO:0003723,GO:0009982		TRUE	-0.4155	0.0412456	0.260115	Chromosome_I	1004712	1005506	795	+	10.923	1982.04	1696.87	1697.37	1285.06	1568.91	1081.14	1105.52	1273.93	1297.03	2714.21	3205.55	3134.58	2474.5	2899.15	2997.21	2376.46	2676.33	2426.36	1641.23	1614.56	2040.4	102.732	88.2108	89.1151	87.0805	102.041	66.5653	66.2113	69.6331
pgaptmp_003979	pgaptmp_003979	pgaptmp_003979	protein_coding	protein_coding	pgaptmp_003979	0.4418	1530				TRUE	0.444826	0.0412606	0.260115	Chromosome_II	746123	747652	1530	-	7.69358	191.96	274.596	307.945	352.335	344.778	454.392	415.776	397.777	405.365	108.972	99.7767	120.418	145.818	138.742	125.158	80.9009	107.852	99.2242	322.433	296.915	232.619	5.16984	7.41729	8.40085	12.4059	11.6518	14.5369	12.939	11.2976
pgaptmp_001885	pgaptmp_001885	pgaptmp_001885	protein_coding	protein_coding	pgaptmp_001885	0.4575	765		GO:0005524,GO:0016887,GO:0042626,GO:0140359		TRUE	-0.322098	0.0413611	0.260309	Chromosome_I	2025258	2026022	765	-	8.66348	447.906	407.494	548.093	524.018	508.633	531.087	256.148	263.443	282.208	407.637	406.363	305.678	259.233	287.474	283.253	460.124	400.783	362.499	653.249	614.857	716.134	24.1259	22.0141	29.9043	36.9019	34.3785	33.981	15.9427	14.9645
pgaptmp_003610	pgaptmp_003610	pgaptmp_003610	protein_coding	protein_coding	pgaptmp_003610	0.46	924		GO:0046872		TRUE	-0.361136	0.0414138	0.260309	Chromosome_II	359164	360087	924	+	6.4796	56.2774	66.0088	84.1336	85.8415	99.6785	72.5708	95.0345	91.7946	92.8963	52.4681	90.7061	64.8407	92.7936	168.71	142.285	65.732	94.5369	74.0874	122.379	117.874	99.6938	2.50969	2.95237	3.80048	5.00484	5.57793	3.84435	4.89714	4.31701
pgaptmp_004248	pgaptmp_004248	pgaptmp_004248	protein_coding	protein_coding	pgaptmp_004248	0.4691	1761				TRUE	0.321955	0.0414398	0.260309	Chromosome_II	1099406	1101166	1761	-	9.50579	588.985	668.009	666.534	847.525	893.693	931.051	1067.65	976.158	1022.56	577.149	702.065	548.367	567.072	576.057	588.902	819.122	585.863	797.762	731.483	742.288	685.395	13.7817	15.6771	15.7981	25.9273	26.2405	25.879	28.8671	24.0878
pgaptmp_003054	pgaptmp_003054	pgaptmp_003054	protein_coding	protein_coding	pgaptmp_003054	0.4411	1086				TRUE	-0.375866	0.0415846	0.260907	Chromosome_I	3306204	3307289	1086	+	10.8354	2431.49	2558.5	2242.2	1736.69	1603.05	1363.18	1678.7	1817.24	1719.99	1689.07	1509.35	1600.64	1880.91	2004.55	1936.66	1518.58	1639.08	1754.28	1951.92	1900	2319.54	92.2573	97.3637	86.1759	86.1503	76.3239	61.4406	73.5995	72.7141
pgaptmp_000812	pgaptmp_000812	pgaptmp_000812	protein_coding	protein_coding	pgaptmp_000812	0.4511	450				TRUE	-0.409285	0.0416874	0.260964	Chromosome_I	858278	858727	450	-	9.82293	1377.64	1622.94	1668.79	1669.43	1285.58	1483.58	1765.56	1346.32	1558.12	520.645	471.672	453.885	428.618	529.44	513.807	276.411	299.589	328.101	2265.98	1879.61	1833.53	126.148	149.049	154.785	199.857	147.717	161.373	186.811	130.009
pgaptmp_005174	pgaptmp_005174	pgaptmp_005174	protein_coding	protein_coding	pgaptmp_005174	0.4732	765		GO:0004324		TRUE	-0.485746	0.0416928	0.260964	Chromosome_II	2141263	2142027	765	-	8.44757	488.765	466.462	490.099	347.85	393.935	318.322	843.431	964.217	931.778	201.8	185.04	168.586	276.908	202.008	208.158	178.656	221.03	187.864	351.492	587.459	568.255	26.3267	25.1998	26.7401	24.496	26.6261	20.3675	52.4954	54.771
pgaptmp_000867	pgaptmp_000867	pgaptmp_000867	protein_coding	protein_coding	pgaptmp_000867	0.4273	543				TRUE	-0.495933	0.0418364	0.261432	Chromosome_I	915128	915670	543	-	11.7538	5633.13	5715.48	7549.15	6240.81	4546.3	4332.81	6041.38	5041.99	5461.88	1846.47	1919.34	1608.05	1117.94	1884.67	1894.5	1666.9	1896.06	1537.31	8479.94	6697.16	6393.69	427.473	435.005	580.282	619.163	432.914	390.573	529.747	403.496
pgaptmp_003531	pgaptmp_003531	pgaptmp_003531	protein_coding	protein_coding	pgaptmp_003531	0.4501	942		GO:0003677,GO:0003700		TRUE	-0.557173	0.0418669	0.261432	Chromosome_II	284282	285223	942	+	7.96616	220.484	214.749	217.277	295.961	292.208	162.46	237.586	285.832	311.062	250.232	241.278	255.658	185.587	256.395	212.11	205.623	195.731	216.97	322.992	339.605	460.253	9.6446	9.42152	9.62728	16.9258	16.0393	8.44165	12.0089	13.1855
pgaptmp_001494	pgaptmp_001494	pgaptmp_001494	protein_coding	protein_coding	pgaptmp_001494	0.4607	675		GO:0003700		TRUE	0.316669	0.0420527	0.262226	Chromosome_I	1544072	1544746	675	-	8.81743	912.773	1018.3	868.291	647.655	578.955	582.216	929.557	847.794	911.369	181.62	244.906	240.837	220.937	204.228	247.681	332.031	323.556	275.182	462.695	502.717	500.13	55.7208	62.3464	53.6911	51.6897	44.3491	42.2195	65.5699	54.5788
pgaptmp_004122	pgaptmp_004122	pgaptmp_004122	protein_coding	protein_coding	pgaptmp_004122	0.4546	981				TRUE	0.309739	0.0421326	0.262226	Chromosome_II	934580	935560	981	-	7.63465	231.277	222.67	218.094	281.868	258.072	277.913	277.679	346.282	249.131	147.314	195.925	192.669	128.143	116.543	127.793	121.351	151.792	142.883	227.995	228.102	207.695	9.71452	9.38066	9.2793	15.4789	13.6024	13.8667	13.4774	15.3391
pgaptmp_003167	pgaptmp_003167	gorA	protein_coding	protein_coding	pgaptmp_003167	0.4926	1356	GO:0006749,GO:0045454	GO:0004362,GO:0050660,GO:0050661		TRUE	-0.605444	0.0421435	0.262226	Chromosome_I	3433745	3435100	1356	+	12.4553	7616.72	5902.06	5645.12	3099.26	3692.2	1919	3790.24	5180.8	5265.53	7868.2	8031.12	7638.23	10684.5	11655.4	12143	4670.34	5476.48	6060.61	3528.33	4305.91	5495.62	231.455	179.881	173.762	123.13	140.789	69.2706	133.088	166.025
pgaptmp_001879	pgaptmp_001879	pgaptmp_001879	protein_coding	protein_coding	pgaptmp_001879	0.4491	1779	GO:0055085	GO:0005524,GO:0042626,GO:0140359	GO:0016020	TRUE	0.314586	0.0422358	0.26249	Chromosome_I	2014774	2016552	1779	+	8.47733	433.259	554.474	567.697	393.974	422.61	449.444	591.738	562.709	543.302	234.088	188.669	251.952	282.799	350.74	312.237	261.243	256.981	214.324	347.58	350.437	328.159	10.0353	12.8809	13.3193	11.9304	12.2831	12.3661	15.8375	13.745
pgaptmp_000968	pgaptmp_000968	aqpZ	protein_coding	protein_coding	pgaptmp_000968	0.4635	699	GO:0006833	GO:0015250		TRUE	-0.492155	0.0423583	0.262941	Chromosome_I	1025925	1026623	699	-	8.39141	298.347	330.924	317.747	483.659	396.666	630.871	495.961	377.627	374.4	326.917	306.587	311.235	263.652	218.657	208.158	161.802	145.134	119.069	773.393	765.226	629.732	17.5874	19.5656	18.9734	37.2758	29.3421	44.177	33.7834	23.4759
pgaptmp_004366	pgaptmp_004366	pntB	protein_coding	protein_coding	pgaptmp_004366	0.4674	1395		GO:0008750,GO:0050661	GO:0016020	TRUE	0.478017	0.0424489	0.263193	Chromosome_II	1230083	1231477	1395	-	12.1546	6328.5	5488.41	5445.81	5682.2	7046.45	4387.24	6097.8	9289.17	8136.16	4736.25	5875.94	4933.45	2906.06	2618.34	2758.75	2794.45	2741.57	2944.97	3553.47	4111.58	4697.24	186.933	162.598	162.941	219.435	261.18	153.939	208.129	289.361
pgaptmp_003450	pgaptmp_003450	pgaptmp_003450	protein_coding	protein_coding	pgaptmp_003450	0.4444	630				TRUE	0.438495	0.0425576	0.263557	Chromosome_II	199290	199919	630	+	7.09777	147.246	212.108	222.178	288.274	266.264	348.01	354.152	300.012	247.02	52.4681	65.3084	57.4303	41.2416	81.0254	67.1901	52.2485	67.9068	74.0874	248.112	243.394	177.787	9.63079	13.9142	14.7198	24.6507	21.8533	27.0386	26.7659	20.6936
pgaptmp_003707	pgaptmp_003707	pgaptmp_003707	protein_coding	protein_coding	pgaptmp_003707	0.4646	678				TRUE	0.383669	0.0426465	0.263661	Chromosome_II	466535	467212	678	-	7.22765	108.7	127.617	116.807	183.214	249.196	161.635	212.343	187.321	204.794	139.242	166.899	161.175	135.508	112.104	109.349	114.61	150.46	117.746	147.526	159.926	146.218	6.6063	7.77894	7.19084	14.5577	19.0045	11.6691	14.9122	12.0059
pgaptmp_001915	pgaptmp_001915	pgaptmp_001915	protein_coding	protein_coding	pgaptmp_001915	0.4364	825				TRUE	-0.389671	0.0426746	0.263661	Chromosome_I	2060672	2061496	825	+	11.1679	3398.23	3913	4368.41	3233.79	2514.49	2956.44	3949.87	3418.79	3599.03	1727.41	1491.21	1652.51	1154.76	1631.61	1631.01	884.854	940.043	931.384	3995.49	3787.9	3780.89	169.729	196.019	221.009	211.165	157.594	175.407	227.962	180.076
pgaptmp_003395	pgaptmp_003395	pgaptmp_003395	protein_coding	protein_coding	pgaptmp_003395	0.4381	1479			GO:0009279	TRUE	0.417471	0.0428597	0.264087	Chromosome_II	133810	135288	1479	-	6.94789	58.5901	110.895	99.6534	215.244	204.819	246.576	193.781	161.2	151.308	98.8822	88.892	59.2829	107.523	86.575	81.6821	116.295	99.8629	101.87	200.054	164.387	135.417	1.63235	3.09873	2.81232	7.84022	7.16054	8.16047	6.23845	4.73626
pgaptmp_002089	pgaptmp_002089	pgaptmp_002089	protein_coding	protein_coding	pgaptmp_002089	0.4464	336				TRUE	0.382918	0.0428802	0.264087	Chromosome_I	2262652	2262987	336	-	6.35668	167.29	186.585	197.673	159.512	166.586	142.668	153.689	163.439	128.788	40.3601	32.6542	42.6096	36.8228	36.6279	32.9363	32.0233	39.9452	27.7828	131.879	131.892	93.8783	20.5159	22.9498	24.5555	25.5751	25.6356	20.7835	21.7789	21.1375
pgaptmp_001409	pgaptmp_001409	pgaptmp_001409	protein_coding	protein_coding	pgaptmp_001409	0.3016	252				TRUE	0.530505	0.042936	0.264087	Chromosome_I	1462541	1462792	252	+	6.59944	83.2597	96.8129	91.4851	128.762	111.968	154.213	116.566	86.5705	96.4151	113.008	123.36	57.4303	110.469	71.0359	57.968	119.666	90.5424	99.2242	109.527	98.1222	62.3086	13.6142	15.8772	15.1527	27.5266	22.974	29.9539	22.0244	14.9282
pgaptmp_001946	pgaptmp_001946	nhaA	protein_coding	protein_coding	pgaptmp_001946	0.4728	1176	GO:0006814,GO:0006885	GO:0015385	GO:0016020	TRUE	0.47542	0.042986	0.264087	Chromosome_I	2100499	2101674	1176	-	11.8552	1941.18	2240.78	2525.64	1536.82	1332.69	1976.73	2136.05	2012.77	1819.92	10061.8	10331.4	10972.9	12471.2	10981.7	11907.1	8732.24	9945.02	9628.71	1328.29	1173.64	1033.49	68.017	78.7468	89.6407	70.4012	58.5956	82.276	86.4842	74.3744
pgaptmp_004904	pgaptmp_004904	pgaptmp_004904	protein_coding	protein_coding	pgaptmp_004904	0.4822	1572		GO:0005524		TRUE	0.540012	0.0429944	0.264087	Chromosome_II	1840459	1842030	1572	-	7.28902	112.555	118.816	118.44	146.059	146.787	168.232	86.8675	85.078	109.083	228.034	230.393	259.363	204.735	207.558	192.348	267.984	266.301	277.828	142.497	98.7594	72.278	2.95032	3.12366	3.14477	5.00541	4.82812	5.23829	2.6311	2.35181
pgaptmp_000351	pgaptmp_000351	pgaptmp_000351	protein_coding	protein_coding		0.5	1000				TRUE	0.874954	0.0431331	0.264513	pgaptmp_000351	1	1000	1000	+	4.00573	3.08369	0.880117	14.703	38.4365	15.7028	17.318	28.2134	11.9408	8.44511	121.08	52.6095	37.0518	4.41874	11.0994	26.3491	30.3378	11.9836	23.8138	11.1762	3.18579	16.6156	0.127066	0.0363732	0.613685	2.07066	0.811933	0.847679	1.34335	0.518883
pgaptmp_002360	pgaptmp_002360	pgaptmp_002360	protein_coding	protein_coding	pgaptmp_002360	0.4691	663	GO:0006813			TRUE	-0.333728	0.0431643	0.264513	Chromosome_I	2568524	2569186	663	-	9.29871	471.805	428.617	530.94	450.988	514.778	529.437	386.82	393.299	389.179	799.129	941.529	976.315	751.186	909.038	840.536	807.324	987.977	865.235	601.28	619.954	691.21	29.3229	26.7176	33.4251	36.6451	40.1467	39.0871	27.7798	25.7779
pgaptmp_000668	pgaptmp_000668	rlmE	protein_coding	protein_coding	pgaptmp_000668	0.419	630	GO:0001510,GO:0006364	GO:0016436		TRUE	-0.367754	0.043237	0.264537	Chromosome_I	692104	692733	630	+	12.7679	5791.94	6406.37	6121.33	4458.64	4587.26	4201.69	5723.6	5023.33	5706.79	11391.6	9756.35	10504.2	13901.4	13712.2	13326	6298.47	6768.04	6730.05	6385.52	5280.76	5616.91	378.828	420.255	405.552	381.264	376.493	326.449	432.575	346.488
pgaptmp_004771	pgaptmp_004771	pgaptmp_004771	protein_coding	protein_coding	pgaptmp_004771	0.4529	1020				TRUE	0.317354	0.0432941	0.264537	Chromosome_II	1697282	1698301	1020	-	5.96333	49.3391	44.0058	44.1089	87.1228	82.6103	87.4149	105.429	102.989	99.9338	44.3961	29.0259	44.4622	50.0791	74.3657	42.1585	58.9902	61.2493	51.5966	63.7044	68.1758	73.1088	1.99319	1.783	1.80496	4.60146	4.18772	4.19486	4.92144	4.38762
pgaptmp_001502	pgaptmp_001502	pgaptmp_001502	protein_coding	protein_coding	pgaptmp_001502	0.4637	1281	GO:0055085	GO:0005524,GO:0016887,GO:0042626,GO:0140359	GO:0005886,GO:0055052	TRUE	0.495416	0.0433189	0.264537	Chromosome_I	1553259	1554539	1281	+	4.28653	13.8766	19.3626	22.0544	33.9523	22.5301	28.0387	23.7586	26.1204	23.2241	18.162	5.44236	12.9681	17.675	12.2093	23.7142	15.1689	15.9781	23.8138	19.5584	22.3005	12.4617	0.446367	0.624677	0.718601	1.42785	0.909405	1.07138	0.88309	0.886071
pgaptmp_004063	pgaptmp_004063	pgaptmp_004063	protein_coding	protein_coding	pgaptmp_004063	0.4758	2001	GO:0006935			TRUE	0.416887	0.0434687	0.265117	Chromosome_II	851544	853544	2001	+	6.35813	64.7575	92.4123	84.9504	110.185	108.554	117.103	104.686	100.75	117.528	50.4501	67.1225	68.5459	47.1332	73.2558	88.2694	60.6757	61.2493	95.2552	93.3213	93.025	62.3086	1.33353	1.90864	1.77198	2.96646	2.80506	2.86453	2.49101	2.18794
pgaptmp_003272	pgaptmp_003272	pgaptmp_003272	protein_coding	protein_coding	pgaptmp_003272	0.4726	1350	GO:0030245	GO:0008422		TRUE	0.312833	0.043529	0.265117	Chromosome_II	6007	7356	1350	-	6.16003	57.0483	60.7281	74.3316	77.5136	88.0721	73.3955	116.566	111.198	108.379	54.4861	54.4236	61.1355	54.4978	58.8266	89.5869	53.9339	63.9123	78.0564	67.0572	62.4414	60.647	1.74127	1.85908	2.29816	3.0932	3.37325	2.66114	4.11121	3.57933
pgaptmp_002750	pgaptmp_002750	pgaptmp_002750	protein_coding	protein_coding	pgaptmp_002750	0.4511	1002				TRUE	0.319712	0.043565	0.265117	Chromosome_I	2977525	2978526	1002	+	10.9572	2029.84	2231.98	2248.74	2014.07	2239.35	2027.04	1357.95	1459.76	1386.41	3067.37	3134.8	2991.93	1939.83	2097.78	1995.94	2025.89	1949.32	1596.85	1711.08	1622.2	1747.96	83.4742	92.0584	93.6724	108.286	115.558	99.0208	64.5283	63.3069
pgaptmp_003206	pgaptmp_003206	pgaptmp_003206	protein_coding	protein_coding		0.5	1000				TRUE	-1.57693	0.043696	0.265607	pgaptmp_003206	1	1000	1000	+	9.11949	454.844	300.12	471.311	159.512	330.441	271.316	378.653	379.866	130.899	1523.59	313.843	1252.35	97.2123	1541.7	1744.31	2396.69	1902.72	2356.24	1560.2	615.494	150.371	18.7422	12.4033	19.672	8.59323	17.0859	13.2803	18.0291	16.507
pgaptmp_003702	pgaptmp_003702	pgaptmp_003702	protein_coding	protein_coding	pgaptmp_003702	0.4807	1371	GO:0006094	GO:0003941		TRUE	0.355969	0.0437742	0.265776	Chromosome_II	461792	463162	1371	-	8.19559	183.48	193.626	235.247	353.616	298.353	338.939	398.7	329.117	330.767	230.052	235.836	268.626	266.597	280.814	304.332	404.505	442.06	449.816	287.228	264.42	227.634	5.51453	5.8367	7.1619	13.895	11.2522	12.1009	13.8465	10.4316
pgaptmp_002433	pgaptmp_002433	pgaptmp_002433	protein_coding	protein_coding	pgaptmp_002433	0.4705	1290		GO:0046912		TRUE	0.418082	0.0438482	0.265918	Chromosome_I	2648710	2649999	1290	+	11.0959	3085.23	3266.99	2858.09	2589.34	2838.79	1946.22	2565.19	3129.23	3097.95	1384.35	1652.66	1378.33	1727.73	1866.91	1758.8	2389.95	2027.88	2484.57	1596.52	2021.7	1937.38	98.55	104.665	92.4756	108.134	113.786	73.8473	94.6809	105.411
pgaptmp_001770	pgaptmp_001770	pgaptmp_001770	protein_coding	protein_coding	pgaptmp_001770	0.4711	1125				TRUE	0.425708	0.0439241	0.266072	Chromosome_I	1868252	1869376	1125	+	4.80675	37.7752	41.3655	58.8118	37.7959	31.4056	31.3374	33.4106	22.3889	34.4842	16.144	29.0259	33.3466	19.1479	25.5285	31.6189	10.1126	14.6466	27.7828	21.2348	29.9464	19.108	1.38361	1.51959	2.18199	1.80991	1.44344	1.36346	1.41405	0.864805
pgaptmp_000389	pgaptmp_000389	pgaptmp_000389	protein_coding	protein_coding	pgaptmp_000389	0.4398	714				TRUE	-0.404357	0.0439849	0.266134	Chromosome_I	419344	420057	714	+	10.1537	1274.34	1089.58	1219.53	1202.42	1108.75	932.7	1110.72	1201.54	1418.78	1057.43	965.113	963.347	1067.86	1229.81	1243.68	805.638	1070.53	927.415	1193.62	1499.23	1650.76	73.5434	63.0673	71.291	90.7242	80.2935	63.9406	74.0692	73.1269
pgaptmp_004575	pgaptmp_004575	pgaptmp_004575	protein_coding	protein_coding	pgaptmp_004575	0.4194	651	GO:0000160,GO:0006355	GO:0000156,GO:0003677		TRUE	0.318166	0.0440889	0.266373	Chromosome_II	1464005	1464655	651	+	7.44139	195.043	227.95	220.544	349.132	298.353	324.095	262.83	288.071	321.618	110.99	92.5202	124.124	92.7936	109.884	75.0949	94.3844	86.5479	83.3483	250.906	276.526	257.542	12.3455	14.4711	14.1402	28.8917	23.697	24.3682	19.2232	19.229
pgaptmp_000445	pgaptmp_000445	pgaptmp_000445	protein_coding	protein_coding	pgaptmp_000445	0.4178	450				TRUE	-0.400814	0.0441256	0.266373	Chromosome_I	480138	480587	450	-	9.53912	643.72	763.941	797.227	614.344	574.175	658.086	576.889	476.138	541.895	795.093	834.496	950.379	667.23	510.571	636.33	1361.83	1239.63	1144.39	918.684	889.472	667.118	58.9445	70.1599	73.9453	73.5467	65.9745	71.5818	61.0397	45.9788
pgaptmp_002047	pgaptmp_002047	pgaptmp_002047	protein_coding	protein_coding	pgaptmp_002047	0.4528	519				TRUE	-0.312471	0.0442733	0.26684	Chromosome_I	2213875	2214393	519	-	8.34836	199.669	213.868	188.688	144.137	180.923	154.213	167.795	129.11	149.197	425.799	825.425	509.463	1285.85	652.643	988.09	578.104	1031.92	721.029	211.789	201.979	191.911	15.8526	17.0302	15.1746	14.9614	18.0248	14.5441	15.3938	10.8101
pgaptmp_003258	pgaptmp_003258	mnmG	protein_coding	protein_coding	pgaptmp_003258	0.4662	1896	GO:0002098,GO:0008033			TRUE	-0.537179	0.0443043	0.26684	Chromosome_I	3525225	3527120	1896	-	13.3815	10664.9	8144.6	7249.37	4931.4	6469.54	4185.19	4428.76	6429.36	6269.79	19171	18524	20906.5	23596.1	26871.6	26928.8	15967.8	17729	17524.3	6414.58	6605.41	9765.84	231.781	177.531	159.589	140.119	176.433	108.046	111.218	147.356
pgaptmp_002298	pgaptmp_002298	pgaptmp_002298	protein_coding	protein_coding	pgaptmp_002298	0.4842	2307	GO:0006812	GO:0019829		TRUE	-0.417505	0.0445394	0.267949	Chromosome_I	2496773	2499079	2307	-	11.974	6170.47	5068.59	5246.5	2297.22	2776.66	2202.69	3773.91	4967.36	4639.89	4597.01	6443.76	5763.41	3543.83	2778.17	3198.78	5069.79	5123.63	5187.44	2653.23	3388.4	3772.58	110.212	90.7991	94.9212	53.6438	62.2328	46.7346	77.8891	93.5654
pgaptmp_004078	pgaptmp_004078	pgaptmp_004078	protein_coding	protein_coding	pgaptmp_004078	0.4757	1770				TRUE	0.317947	0.0447254	0.268761	Chromosome_II	867037	868806	1770	-	6.80436	86.3433	111.775	82.4999	147.34	136.546	145.966	163.341	125.378	163.272	104.936	78.0072	75.9562	66.2811	124.313	113.301	111.239	98.5314	113.777	125.732	113.414	105.509	2.01008	2.60983	1.94545	4.48447	3.98886	4.03657	4.39394	3.07812
pgaptmp_004389	pgaptmp_004389	pgaptmp_004389	protein_coding	protein_coding	pgaptmp_004389	0.4604	417				TRUE	0.654102	0.044866	0.269298	Chromosome_II	1254251	1254667	417	-	5.44294	19.2731	24.6433	27.7722	16.0152	33.4537	42.0581	34.153	46.2705	40.8181	76.6841	88.892	61.1355	91.3206	57.7167	54.0156	111.239	121.167	100.547	18.9995	19.1147	12.4617	1.90447	2.44233	2.77982	2.069	4.14813	4.93681	3.89965	4.82176
pgaptmp_004332	pgaptmp_004332	pgaptmp_004332	protein_coding	protein_coding	pgaptmp_004332	0.4389	597				TRUE	0.542479	0.0450001	0.269562	Chromosome_II	1189344	1189940	597	-	8.79971	319.933	374.05	414.133	564.376	512.047	822.195	739.487	571.664	597.492	270.412	322.914	322.351	390.322	358.509	408.411	483.72	428.745	498.767	530.87	424.347	363.051	22.0822	25.8938	28.9539	50.9282	44.3486	67.4114	58.9779	41.6106
pgaptmp_001789	pgaptmp_001789	pgaptmp_001789	protein_coding	protein_coding	pgaptmp_001789	0.487	1881				TRUE	0.43254	0.0450123	0.269562	Chromosome_I	1909046	1910926	1881	-	8.66855	454.844	423.336	463.143	411.911	395.3	392.542	496.704	450.764	490.52	447.997	455.345	452.032	540.559	429.545	513.807	288.209	366.164	329.424	218.495	328.136	348.097	9.96397	9.30118	10.277	11.7972	10.8663	10.2148	12.5731	10.4135
pgaptmp_000126	pgaptmp_000126	pgaptmp_000126	protein_coding	protein_coding		0.5	1000				TRUE	-1.44954	0.0450812	0.269667	pgaptmp_000126	1	1000	1000	+	9.16233	440.197	330.924	537.475	195.386	320.883	291.108	396.472	358.969	124.565	1616.42	308.401	1256.06	97.2123	1559.46	1829.94	2507.93	1947.99	2458.11	1458.49	639.706	159.51	18.1387	13.6763	22.4336	10.5258	16.5917	14.2491	18.8775	15.5989
pgaptmp_003204	pgaptmp_003204	pgaptmp_003204	protein_coding	protein_coding		0.5	1000				TRUE	-1.53437	0.0453102	0.270294	pgaptmp_003204	1	1000	1000	+	8.32624	363.105	277.237	372.475	99.9349	207.55	172.356	257.633	250.01	100.638	635.671	210.438	678.048	44.1874	718.129	725.917	932.046	709.693	943.291	948.86	395.038	92.2167	14.962	11.4576	15.5467	5.38371	10.7316	8.43643	12.2669	10.8641
pgaptmp_001936	pgaptmp_001936	pgaptmp_001936	protein_coding	protein_coding	pgaptmp_001936	0.4592	906				TRUE	0.390951	0.0454254	0.270294	Chromosome_I	2087214	2088119	906	+	10.4324	1841.73	1858.81	1810.91	1850.72	2144.45	1425.03	1244.36	1454.53	1463.82	1186.59	1166.48	1076.36	1257.87	1229.81	1356.98	1085.42	986.646	1062.36	1286.94	1434.24	1437.25	83.7639	84.7906	83.4278	110.047	122.386	76.9888	65.3958	69.7643
pgaptmp_000553	pgaptmp_000553	lepB	protein_coding	protein_coding	pgaptmp_000553	0.4611	900	GO:0006465,GO:0009306	GO:0004252	GO:0016020	TRUE	-0.340877	0.0455216	0.270294	Chromosome_I	559893	560792	900	+	12.4049	5182.14	4265.93	4462.35	3196	3630.07	3311.87	3042.59	3825.52	3459.68	9187.97	8704.16	10176.3	7321.85	7790.64	8173.48	8277.17	8062.27	8375.84	4234.1	4148.53	4600.04	237.26	195.89	206.948	191.306	208.553	180.121	160.966	184.708
pgaptmp_004639	pgaptmp_004639	pgaptmp_004639	protein_coding	protein_coding	pgaptmp_004639	0.4405	681				TRUE	-0.560248	0.0455966	0.270294	Chromosome_II	1549083	1549763	681	-	10.4249	696.914	984.851	1109.26	999.349	798.111	1352.46	1917.02	1353.78	1432.85	2841.35	2728.44	2764.07	1226.94	1139.9	1060.55	1309.58	1547.21	1051.78	1853.57	1603.72	1276.91	42.1687	59.7675	67.987	79.0559	60.5982	97.2096	134.034	86.3853
pgaptmp_003205	pgaptmp_003205	pgaptmp_003205	protein_coding	protein_coding		0.5	1000				TRUE	-1.57336	0.045706	0.270294	pgaptmp_003205	1	1000	1000	+	9.43946	595.152	432.137	642.029	199.87	411.686	343.062	482.597	482.855	172.421	1783.92	420.876	1520.98	120.779	1843.6	2072.35	2792.77	2181.01	2714.77	1934.04	785.615	181.11	24.5237	17.8593	26.7976	10.7674	21.2868	16.7921	22.9783	20.9823
pgaptmp_002119	pgaptmp_002119	pgaptmp_002119	protein_coding	protein_coding	pgaptmp_002119	0.5088	1710				TRUE	0.463325	0.0457137	0.270294	Chromosome_I	2303167	2304876	1710	-	8.92038	383.149	332.684	418.217	178.089	266.264	305.952	277.679	302.997	269.54	692.175	800.028	789.204	1721.84	1374.1	1410.99	1110.7	1163.74	1172.17	181.054	184.776	179.449	9.23271	8.0404	10.2081	5.61055	8.05121	8.7577	7.73178	7.6998
pgaptmp_005302	pgaptmp_005302	pgaptmp_005302	protein_coding	protein_coding	pgaptmp_005302	0.4884	774				TRUE	-0.333233	0.0457206	0.270294	Chromosome_II	2288747	2289520	774	+	9.4936	854.953	920.602	960.593	1219.08	1186.58	1005.27	1654.19	1611.26	1629.91	304.719	402.735	351.992	435.982	385.148	379.427	269.67	284.942	326.778	1354.56	1433.6	1557.72	45.5155	49.1556	51.8012	84.8506	79.2686	63.5733	101.76	90.461
pgaptmp_001541	pgaptmp_001541	pgaptmp_001541	protein_coding	protein_coding	pgaptmp_001541	0.4106	738				TRUE	0.524354	0.0457277	0.270294	Chromosome_I	1598756	1599493	738	+	7.51742	220.484	344.126	326.732	335.038	328.393	423.055	328.166	260.458	271.651	108.972	63.4943	75.9562	129.616	93.2347	63.2378	106.182	127.825	133.622	324.11	254.226	180.28	12.3106	19.2709	18.4789	24.4569	23.0081	28.0591	21.1724	15.3362
pgaptmp_004625	pgaptmp_004625	pgaptmp_004625	protein_coding	protein_coding	pgaptmp_004625	0.4167	1116				TRUE	0.369533	0.0457436	0.270294	Chromosome_II	1532569	1533684	1116	-	8.90187	527.311	585.278	519.504	703.388	679.998	496.451	602.875	667.19	653.793	391.493	444.46	368.666	300.474	469.503	334.633	419.673	396.789	308.256	500.135	450.47	512.592	19.4698	21.674	19.4297	33.9543	31.5056	21.7743	25.7215	25.979
pgaptmp_004898	pgaptmp_004898	pgaptmp_004898	protein_coding	protein_coding	pgaptmp_004898	0.4302	516				TRUE	0.356952	0.0457667	0.270294	Chromosome_II	1832968	1833483	516	-	7.52372	163.436	235.871	198.49	258.806	230.08	301.829	263.572	208.963	232.241	169.512	105.219	151.912	144.346	125.423	137.015	117.98	153.123	170.666	205.642	214.085	201.88	13.0513	18.8915	16.0557	27.0202	23.0554	28.6315	24.3211	17.5978
pgaptmp_003277	pgaptmp_003277	pgaptmp_003277	protein_coding	protein_coding	pgaptmp_003277	0.4706	1326		GO:0015288	GO:0009279	TRUE	0.287739	0.0457721	0.270294	Chromosome_II	12072	13397	1326	-	6.86212	74.7795	82.731	81.6831	117.231	119.478	108.032	110.626	109.706	137.937	113.008	103.405	125.976	157.602	135.412	121.206	183.712	169.101	158.759	91.6449	96.2108	93.8783	2.32379	2.5785	2.57116	4.76282	4.65894	3.98786	3.97235	3.5952
pgaptmp_004247	pgaptmp_004247	pgaptmp_004247	protein_coding	protein_coding	pgaptmp_004247	0.4671	1413	GO:0006081	GO:0050269		TRUE	0.364461	0.0458397	0.270294	Chromosome_II	1097553	1098965	1413	+	9.12379	423.237	386.371	428.836	479.175	615.139	490.678	634.801	859.735	732.614	474.231	625.872	561.335	687.851	582.717	652.14	664.062	643.117	878.465	352.05	450.47	435.329	12.3424	11.3007	12.6675	18.2691	22.51	16.9976	21.3909	26.4399
pgaptmp_004250	pgaptmp_004250	pgaptmp_004250	protein_coding	protein_coding	pgaptmp_004250	0.4082	441				TRUE	0.375161	0.0458535	0.270294	Chromosome_II	1101883	1102323	441	-	5.35963	37.0043	45.7661	53.094	75.5918	71.0039	51.9541	60.8815	68.6594	64.0421	18.162	23.5836	40.757	19.1479	22.1987	25.0316	28.6524	31.9561	30.4287	54.2046	45.8753	49.8469	3.45758	4.28891	5.02514	9.23422	8.32506	5.76653	6.57324	6.76548
pgaptmp_002676	pgaptmp_002676	pgaptmp_002676	protein_coding	protein_coding	pgaptmp_002676	0.4	225				TRUE	-0.342251	0.0459874	0.27078	Chromosome_I	2899602	2899826	225	-	9.52975	1203.41	1219.84	1457.23	1168.47	1029.56	975.583	1743.29	1143.33	1121.79	343.061	330.17	300.12	217.991	406.237	368.887	493.833	440.728	501.413	1418.82	1225.89	1429.77	220.389	224.059	270.324	279.769	236.598	212.234	368.909	220.814
pgaptmp_004201	pgaptmp_004201	pgaptmp_004201	protein_coding	protein_coding	pgaptmp_004201	0.4068	1362		GO:0005525,GO:0046872	GO:0005886	TRUE	0.497475	0.0462225	0.271861	Chromosome_II	1050421	1051782	1362	+	7.77928	193.502	278.997	222.178	334.398	322.931	483.256	455.869	346.282	338.508	195.746	139.687	157.47	147.291	126.533	101.444	148.318	142.471	121.715	320.757	268.88	224.311	5.85417	8.46572	6.80871	13.2267	12.2596	17.3673	15.9366	11.0482
pgaptmp_003266	pgaptmp_003266	pgaptmp_003266	protein_coding	protein_coding	pgaptmp_003266	0.4658	672	GO:0006865	GO:0042626,GO:0140359		TRUE	-0.324339	0.0463111	0.271886	Chromosome_I	3532957	3533628	672	-	10.5117	602.091	570.316	621.608	449.067	507.951	413.159	440.277	467.929	421.552	7317.28	6786.63	7008.35	5364.35	5056.87	5902.19	5499.58	6247.43	4285.16	630.897	521.195	584.87	36.9191	35.0742	38.609	36.0003	39.0837	30.0941	31.1953	30.2585
pgaptmp_002906	pgaptmp_002906	ilvN	protein_coding	protein_coding	pgaptmp_002906	0.4747	495	GO:0009082	GO:1990610		TRUE	0.32857	0.0463302	0.271886	Chromosome_I	3161202	3161696	495	-	10.0313	572.025	495.506	553.811	748.231	833.613	687.774	769.928	1204.52	1104.2	1237.04	1326.12	1435.76	2315.42	1953.49	2014.39	1862.41	1857.45	2239.82	548.193	601.477	671.271	47.6176	41.37	46.6979	81.4319	87.0769	68.01	74.059	105.742
pgaptmp_001906	pgaptmp_001906	pgaptmp_001906	protein_coding	protein_coding	pgaptmp_001906	0.4589	231				TRUE	0.520688	0.046426	0.272145	Chromosome_I	2048397	2048627	231	+	7.08447	329.955	396.933	375.742	213.323	202.771	342.237	357.122	217.919	242.093	46.4141	48.9813	48.1674	47.1332	41.0676	35.5713	91.0135	97.1999	97.9012	184.966	187.961	157.848	58.8574	71.0144	67.892	49.7496	45.3876	72.5184	73.6101	40.994
pgaptmp_001458	pgaptmp_001458	purT	protein_coding	protein_coding	pgaptmp_001458	0.4685	1176	GO:0009152	GO:0000287,GO:0004644,GO:0005524		TRUE	0.406045	0.0465126	0.272235	Chromosome_I	1508985	1510160	1176	-	7.24225	156.497	182.184	178.069	178.089	152.931	216.888	157.401	141.797	142.159	147.314	186.855	179.701	142.873	134.302	151.507	85.9572	115.841	148.175	154.232	131.254	128.771	5.4835	6.40243	6.32007	8.1582	6.72409	9.02736	6.37284	5.23957
pgaptmp_005186	pgaptmp_005186	pgaptmp_005186	protein_coding	protein_coding	pgaptmp_005186	0.4544	933	GO:0009263			TRUE	-0.667571	0.0465448	0.272235	Chromosome_II	2154896	2155828	933	-	6.19311	49.3391	44.0058	50.6435	89.0446	92.8512	53.6035	78.7005	107.467	80.2286	36.3241	94.3343	72.251	67.754	55.4968	43.476	62.3611	75.8958	87.3173	77.1158	140.812	172.803	2.17905	1.94926	2.2656	5.1415	5.14576	2.81219	4.01632	5.0053
pgaptmp_004703	pgaptmp_004703	pgaptmp_004703	protein_coding	protein_coding	pgaptmp_004703	0.508	1368				TRUE	-0.305668	0.0467409	0.273079	Chromosome_II	1619590	1620957	1368	+	7.12435	137.224	167.222	162.549	126.84	122.209	130.298	279.164	243.293	285.023	106.954	92.5202	94.4821	98.6852	99.8943	81.6821	102.812	138.477	146.852	166.525	166.298	146.218	4.13336	5.05184	4.95952	4.99501	4.61912	4.66212	9.71641	7.72825
pgaptmp_001755	pgaptmp_001755	pgaptmp_001755	protein_coding	protein_coding	pgaptmp_001755	0.4493	612				TRUE	0.458181	0.046929	0.273874	Chromosome_I	1851101	1851712	612	-	10.3215	1917.28	2487.21	2511.75	1969.87	1675.42	2591.93	2418.93	1941.87	2053.57	807.201	903.433	842.929	801.265	709.249	623.156	573.048	701.704	554.332	1587.02	1506.24	1517.01	129.09	167.959	171.304	173.401	141.552	207.303	188.193	137.881
pgaptmp_004554	pgaptmp_004554	pgaptmp_004554	protein_coding	protein_coding	pgaptmp_004554	0.4396	1242	GO:0007165	GO:0000156,GO:0004673,GO:0005524		TRUE	0.312959	0.046994	0.27395	Chromosome_II	1439139	1440380	1242	-	9.33786	538.104	532.471	439.455	560.532	666.344	563.249	536.054	589.575	581.305	1004.97	930.644	1091.18	954.448	919.027	882.694	586.532	583.2	699.861	462.695	464.488	524.223	17.8527	17.718	14.7684	24.3133	27.7409	22.1979	20.5504	20.6279
pgaptmp_000217	pgaptmp_000217	frdC	protein_coding	protein_coding	pgaptmp_000217	0.4635	384			GO:0016020	TRUE	0.415584	0.0470715	0.274098	Chromosome_I	235155	235538	384	-	10.1229	3540.85	2552.34	1932.62	1488.13	1656.98	1122.37	1557.68	2874.74	2261.88	639.707	580.519	498.347	674.594	850.211	790.472	615.184	548.58	574.177	905.272	1118.85	1194.66	379.957	274.694	210.066	208.773	223.116	143.067	193.143	325.315
pgaptmp_000178	pgaptmp_000178	fis	protein_coding	protein_coding	pgaptmp_000178	0.4074	297				TRUE	-0.612745	0.0471809	0.274103	Chromosome_I	191485	191781	297	-	12.5927	4244.7	3494.06	3245.27	3653.39	4387.9	2126.82	1912.57	2256.06	2453.31	16860.4	15949.8	16925.3	9909.76	13866.4	14067.8	13716.1	12963.5	10914.7	5101.38	4193.13	6334.71	588.91	486.201	456.074	662.68	763.914	350.515	306.615	330.089
pgaptmp_003228	pgaptmp_003228	pgaptmp_003228	protein_coding	protein_coding	pgaptmp_003228	0.4457	267				TRUE	-0.503649	0.0471942	0.274103	Chromosome_I	3495144	3495410	267	+	9.58978	686.892	991.892	695.123	998.709	639.717	951.668	1386.17	670.175	876.181	488.357	411.806	563.188	441.874	472.833	497.998	1130.93	813.55	849.359	1260.12	1042.39	1438.08	106.007	153.53	108.665	201.508	123.886	174.464	247.194	109.072
pgaptmp_003645	pgaptmp_003645	pgaptmp_003645	protein_coding	protein_coding	pgaptmp_003645	0.4073	798				TRUE	0.295593	0.0472627	0.274103	Chromosome_II	401476	402273	798	+	7.76141	144.933	173.383	178.069	259.446	281.967	280.387	256.89	256.726	258.983	244.178	195.925	166.733	194.425	190.909	181.809	237.646	203.72	228.877	235.818	228.739	208.526	7.48383	8.97936	9.31379	17.515	18.27	17.1984	15.3277	13.9799
pgaptmp_004871	pgaptmp_004871	pgaptmp_004871	protein_coding	protein_coding	pgaptmp_004871	0.4671	927		GO:0003824		TRUE	0.383776	0.0472807	0.274103	Chromosome_II	1797739	1798665	927	-	6.03385	40.088	52.807	56.3613	83.2791	81.2448	101.434	91.3222	55.226	61.9308	58.5221	87.0778	107.45	55.9707	67.7061	63.2378	52.2485	43.9397	43.6586	68.7337	75.1846	57.3239	1.78194	2.35425	2.53771	4.83972	4.53169	5.35596	4.69061	2.58882
pgaptmp_002379	pgaptmp_002379	pgaptmp_002379	protein_coding	protein_coding	pgaptmp_002379	0.3883	273				TRUE	-0.380701	0.0475162	0.274635	Chromosome_I	2592078	2592350	273	+	10.8302	1532.59	1654.62	1708.81	1946.81	1644.01	1678.2	1158.23	1073.18	1252.69	2260.16	1866.73	1924.84	1702.69	2056.71	1944.56	2480.96	2444.64	1943.47	2687.32	2150.41	2110.18	231.325	250.482	261.259	384.171	311.377	300.894	202.007	170.823
pgaptmp_001598	pgaptmp_001598	pgaptmp_001598	protein_coding	protein_coding	pgaptmp_001598	0.4692	1509				TRUE	0.380114	0.0475401	0.274635	Chromosome_I	1665258	1666766	1509	+	6.41249	81.7178	109.134	102.104	103.138	95.5821	96.4862	90.5798	76.1224	85.8587	82.7381	59.866	59.2829	86.9019	84.3552	94.8567	67.4174	106.52	88.6403	73.7629	89.8392	60.647	2.23144	2.98892	2.82419	3.68208	3.27515	3.12974	2.85808	2.1921
pgaptmp_003925	pgaptmp_003925	pyrC	protein_coding	protein_coding	pgaptmp_003925	0.4791	1029	GO:0019856	GO:0004151		TRUE	-0.326123	0.0476515	0.274635	Chromosome_II	696226	697254	1029	-	10.6231	825.658	836.111	913.217	1781.53	1803.77	1642.74	1397.3	1288.86	1389.93	1594.22	1801.42	1687.71	1430.2	1644.93	1720.59	2145.56	2155.71	1741.05	2343.65	2272.1	2012.15	33.0631	33.5807	37.0424	93.2701	90.6379	78.1423	64.6559	54.4285
pgaptmp_002232	pgaptmp_002232	torR	protein_coding	protein_coding	pgaptmp_002232	0.472	714				TRUE	0.435865	0.0476608	0.274635	Chromosome_I	2418340	2419053	714	-	12.182	3540.08	5297.42	5332.27	5955.74	5522.6	7530.87	5683.51	4051.65	3896.72	4136.91	5208.34	5289.15	3820.74	3988	3841.7	4220.33	4171.61	3648.8	5125.97	4572.24	4564.31	204.302	306.625	311.713	449.367	399.935	516.274	379.01	246.588
pgaptmp_004877	pgaptmp_004877	pgaptmp_004877	protein_coding	protein_coding	pgaptmp_004877	0.4711	537				TRUE	-0.356567	0.0476648	0.274635	Chromosome_II	1810384	1810920	537	+	5.50065	33.9206	29.924	34.3069	58.2954	47.1083	47.8308	53.4569	55.226	55.597	50.4501	58.0519	48.1674	29.4583	34.408	39.5236	35.3941	30.6246	25.1368	60.3515	68.813	75.6011	2.60284	2.30296	2.66654	5.84822	4.53594	4.35979	4.73983	4.46897
pgaptmp_001244	pgaptmp_001244	pgaptmp_001244	protein_coding	protein_coding	pgaptmp_001244	0.4377	642				TRUE	0.515172	0.0477368	0.274635	Chromosome_I	1329272	1329913	642	+	10.3823	1485.57	2083.24	2167.05	1922.47	2100.76	2996.85	2235.54	1571.7	1644.69	591.275	642.199	498.347	664.284	591.596	692.981	1820.27	1402.08	1532.02	1950.81	1627.3	1404.85	95.3489	134.105	140.888	161.32	169.194	228.487	165.798	106.383
pgaptmp_004956	pgaptmp_004956	pgaptmp_004956	protein_coding	protein_coding	pgaptmp_004956	0.4071	678				TRUE	-0.404061	0.0477671	0.274635	Chromosome_II	1888878	1889555	678	+	10.4669	1201.1	1448.67	1569.95	2049.31	1715.7	2183.72	2782.73	1906.79	2300.59	1170.44	1135.64	1030.04	699.634	746.987	804.964	834.291	822.871	767.334	3029.31	2539.71	2421.73	72.9973	88.3044	96.6489	162.833	130.844	157.652	195.422	122.211
pgaptmp_004023	pgaptmp_004023	pgaptmp_004023	protein_coding	protein_coding	pgaptmp_004023	0.4629	633	GO:0000160			TRUE	0.34038	0.0477898	0.274635	Chromosome_II	791447	792079	633	+	10.215	1749.22	2106.12	1904.85	3101.19	3228.63	2582.04	2991.36	2727.72	2833.34	472.213	598.66	565.04	491.953	517.23	487.458	288.209	387.468	298.996	2516.32	2287.39	2295.45	113.868	137.506	125.602	263.93	263.729	199.66	225.008	187.255
pgaptmp_004503	pgaptmp_004503	pgaptmp_004503	protein_coding	protein_coding	pgaptmp_004503	0.4757	2718		GO:0020037		TRUE	0.349706	0.047901	0.274973	Chromosome_II	1378413	1381130	2718	+	8.6158	255.175	261.395	323.465	529.783	581.003	531.911	372.714	346.282	380.03	445.979	424.504	455.737	369.701	321.882	349.125	448.326	371.49	338.685	488.4	448.559	360.559	3.86854	3.97456	4.96728	10.5006	11.0528	9.57905	6.52918	5.53628
pgaptmp_001339	pgaptmp_001339	pgaptmp_001339	protein_coding	protein_coding	pgaptmp_001339	0.3855	786				TRUE	0.309538	0.0482067	0.276427	Chromosome_I	1412902	1413687	786	+	7.36075	179.625	193.626	177.252	194.745	193.895	197.096	227.192	196.276	205.498	189.692	177.784	101.893	120.779	152.061	100.126	170.229	134.482	125.684	172.672	139.537	162.002	9.41678	10.1808	9.41261	13.3477	12.7552	12.274	13.7627	10.8513
pgaptmp_002463	pgaptmp_002463	pgaptmp_002463	protein_coding	protein_coding	pgaptmp_002463	0.4684	792				TRUE	0.405964	0.0485634	0.277555	Chromosome_I	2679082	2679873	792	-	7.85568	467.179	491.105	520.321	249.837	361.847	321.621	453.641	442.555	435.627	100.9	101.591	90.777	197.37	157.611	191.031	114.61	113.178	148.175	203.966	274.615	227.634	24.3062	25.6266	27.4213	16.994	23.6234	19.877	27.2722	24.2817
pgaptmp_000877	pgaptmp_000877	pgaptmp_000877	protein_coding	protein_coding	pgaptmp_000877	0.4383	486				TRUE	-0.357258	0.0486154	0.277555	Chromosome_I	922029	922514	486	+	11.3306	4038.86	4364.5	4827.47	3378.57	3264.81	2579.56	3354.42	3142.66	3243.63	1511.48	2024.56	1593.23	1531.83	1535.04	1487.41	1762.97	1559.19	1726.5	3873.11	4000.71	4055.04	342.437	371.142	414.595	374.508	347.349	259.802	328.635	280.995
pgaptmp_004775	pgaptmp_004775	pgaptmp_004775	protein_coding	protein_coding	pgaptmp_004775	0.4723	885				TRUE	0.358807	0.048658	0.277555	Chromosome_II	1699858	1700742	885	-	5.24866	33.1497	37.845	32.6732	55.0923	59.3975	51.1295	65.3362	70.8983	56.3008	32.2881	16.3271	18.5259	39.7687	44.3975	31.6189	23.5961	26.6301	18.5218	34.0874	46.5125	45.693	1.54346	1.76729	1.54095	3.35361	3.47031	2.82788	3.51515	3.48121
pgaptmp_002563	pgaptmp_002563	mrdA	protein_coding	protein_coding	pgaptmp_002563	0.4694	1926	GO:0009252	GO:0003824,GO:0008658	GO:0016020	TRUE	-0.348886	0.0486891	0.277555	Chromosome_I	2765705	2767630	1926	+	10.9951	1830.17	1580.69	1725.15	1152.45	1364.78	1102.58	1162.69	1203.78	1237.91	4506.2	4691.32	4422.13	3719.11	4094.56	4330.47	1931.51	2150.38	2237.17	1460.17	1435.52	1763.75	39.1556	33.9181	37.3861	32.2353	36.6395	28.0212	28.7435	27.1599
pgaptmp_000870	pgaptmp_000870	pgaptmp_000870	protein_coding	protein_coding	pgaptmp_000870	0.4069	204				TRUE	-0.34036	0.048695	0.277555	Chromosome_I	918125	918328	204	-	9.01358	518.831	450.62	462.326	406.786	354.337	380.172	462.551	395.538	432.812	708.319	493.441	600.239	521.411	632.664	592.854	750.019	697.709	787.178	466.606	443.462	559.116	104.798	91.2897	94.5931	107.424	89.811	91.2185	107.96	84.2549
pgaptmp_000183	pgaptmp_000183	aroQ	protein_coding	protein_coding	pgaptmp_000183	0.4644	450	GO:0009423	GO:0003855		TRUE	-0.413918	0.0487198	0.277555	Chromosome_I	195817	196266	450	-	11.5895	4297.12	3591.76	3119.48	2417.66	3029.27	2638.94	2088.53	2532.19	2590.54	1604.31	1786.91	1624.72	2573.18	2474.05	3159.25	7549.07	6536.36	6696.97	3470.21	3048.8	4372.4	393.481	329.865	289.341	289.432	348.072	287.045	220.984	244.524
pgaptmp_003827	pgaptmp_003827	pgaptmp_003827	protein_coding	protein_coding	pgaptmp_003827	0.463	540				TRUE	0.441437	0.0488954	0.278254	Chromosome_II	591138	591677	540	-	5.26906	30.8369	36.9649	43.292	44.8426	63.4938	56.9021	47.5173	50.7483	59.8196	22.198	21.7695	27.7889	44.1874	39.9577	31.6189	30.3378	23.9671	31.7517	29.6169	46.5125	41.5391	2.35307	2.82903	3.34623	4.47364	6.07969	5.15784	4.18977	4.0838
pgaptmp_004409	pgaptmp_004409	pgaptmp_004409	protein_coding	protein_coding	pgaptmp_004409	0.4668	1326				TRUE	0.309247	0.0491767	0.279553	Chromosome_II	1278087	1279412	1326	+	7.04639	114.867	143.459	123.341	199.87	174.096	178.128	167.053	158.215	163.272	100.9	114.29	105.598	108.996	128.753	133.063	111.239	73.2328	89.9633	153.673	156.741	136.248	3.56954	4.47122	3.88246	8.12022	6.78874	6.5754	5.99851	5.18492
pgaptmp_004165	pgaptmp_004165	icmH	protein_coding	protein_coding	pgaptmp_004165	0.4583	792				TRUE	-0.370358	0.0494148	0.280294	Chromosome_II	1005737	1006528	792	+	6.0831	60.9029	71.2895	68.6138	79.4355	92.1685	106.382	114.338	100.004	107.675	72.6481	43.5389	44.4622	47.1332	36.6279	44.7934	32.0233	30.6246	35.7207	109.527	136.352	123.786	3.16863	3.71999	3.61599	5.40323	6.01729	6.57471	6.87385	5.48693
pgaptmp_001293	pgaptmp_001293	pgaptmp_001293	protein_coding	protein_coding	pgaptmp_001293	0.4103	429		GO:0008080,GO:0016746		TRUE	0.575146	0.0494154	0.280294	Chromosome_I	1376117	1376545	429	+	7.38974	185.792	247.313	290.792	284.43	230.763	367.802	366.031	268.667	278.689	98.8822	76.1931	72.251	120.779	79.9154	102.761	148.318	115.841	76.7334	262.641	184.776	147.048	17.8455	23.8249	28.2921	35.7176	27.8133	41.9652	40.625	27.2142
pgaptmp_002674	pgaptmp_002674	guaB	protein_coding	protein_coding	pgaptmp_002674	0.4836	1464	GO:0006164	GO:0003938		TRUE	-0.539607	0.0494667	0.280294	Chromosome_I	2896579	2898042	1464	-	12.4235	5300.86	3975.49	3576.09	2921.82	4007.62	2210.11	1857.63	3079.22	3024.76	10324.1	11648.5	12229	13572.9	13757.7	14029.6	6502.41	7447.11	6424.43	4025.67	3798.73	5540.48	149.198	112.225	101.955	107.517	141.543	73.8935	60.4158	91.3982
pgaptmp_001084	pgaptmp_001084	pgaptmp_001084	protein_coding	protein_coding	pgaptmp_001084	0.4559	963				TRUE	-0.402742	0.0495567	0.280501	Chromosome_I	1152924	1153886	963	+	11.5684	1968.94	1741.75	1782.32	1124.91	1139.48	851.883	1158.23	1462.74	1372.33	5186.27	3283.56	4598.13	17040.1	18224	17444.4	9126.63	8982.34	9541.4	1262.35	1239.91	1661.56	84.2488	74.7483	77.2505	62.9296	61.1818	43.2998	57.2668	66.0054
pgaptmp_001957	pgaptmp_001957	rsuA	protein_coding	protein_coding	pgaptmp_001957	0.4672	702				TRUE	-0.328838	0.0498872	0.282069	Chromosome_I	2116949	2117650	702	-	10.2161	1162.55	1149.43	1255.47	750.793	850.681	834.565	800.369	747.044	761.468	1719.34	1705.27	2047.11	2023.78	1764.8	1790.42	1267.45	1431.37	1211.86	939.36	1016.27	1144.82	68.2391	67.6687	74.6466	57.6166	62.6576	58.191	54.2858	46.2431
pgaptmp_000349	pgaptmp_000349	pgaptmp_000349	protein_coding	protein_coding		0.5	1000				TRUE	-1.34389	0.0499778	0.28214	pgaptmp_000349	1	1000	1000	+	7.97115	201.982	170.743	177.252	85.8415	207.55	160.81	190.812	136.573	71.0797	823.345	125.174	581.714	72.1728	613.795	553.331	424.73	587.194	701.184	791.275	278.438	119.633	8.32282	7.05641	7.39831	4.62447	10.7316	7.87131	9.08526	5.93473
pgaptmp_002552	pgaptmp_002552	miaB	protein_coding	protein_coding	pgaptmp_002552	0.4568	1425	GO:0006400	GO:0016782,GO:0051539,GO:1904047		TRUE	-0.434685	0.0500069	0.28214	Chromosome_I	2754163	2755587	1425	+	12.8495	7976.74	7186.15	6785.41	4959.59	5472.76	4123.34	4825.97	5474.09	5505.51	11752.9	11688.4	11947.4	9168.89	11462.3	11364.4	8484.48	8055.61	7124.3	6257	5592.33	8006.24	230.658	208.412	198.748	187.497	198.58	141.634	161.251	166.93
pgaptmp_001988	pgaptmp_001988	pgaptmp_001988	protein_coding	protein_coding	pgaptmp_001988	0.4574	693	GO:0001522	GO:0004730		TRUE	-0.343826	0.0502362	0.28313	Chromosome_I	2150603	2151295	693	-	8.83697	447.135	382.851	480.297	363.225	415.099	362.854	294.756	306.728	280.8	639.707	738.347	726.216	528.776	502.801	603.394	465.18	458.038	453.785	420.225	479.142	569.916	26.5867	22.8317	28.9279	28.2362	30.9715	25.629	20.2517	19.2335
pgaptmp_004576	pgaptmp_004576	pgaptmp_004576	protein_coding	protein_coding	pgaptmp_004576	0.4424	825				TRUE	0.298304	0.0503835	0.283656	Chromosome_II	1464652	1465476	825	+	7.0795	163.436	172.503	187.054	242.15	249.196	204.518	193.781	224.636	239.982	62.5581	48.9813	100.04	64.8082	97.6744	109.349	101.126	63.9123	75.4104	175.466	190.51	201.88	8.16302	8.6414	9.46356	15.8123	15.6182	12.1342	11.1838	11.8321
pgaptmp_002857	pgaptmp_002857	zapG	protein_coding	protein_coding	pgaptmp_002857	0.4369	444				TRUE	-0.378015	0.0505292	0.284001	Chromosome_I	3104035	3104478	444	+	12.107	5635.45	5991.84	7532	5932.04	5018.06	5131.09	6816.5	5910.68	6125.52	2542.68	2882.64	2302.77	2067.97	3227.69	3267.29	3468.63	2816.13	2844.43	7711.02	6591.39	6853.12	523.002	557.723	708.057	719.755	584.382	565.665	730.99	578.485
pgaptmp_003053	pgaptmp_003053	pgaptmp_003053	protein_coding	protein_coding	pgaptmp_003053	0.4296	405	GO:0006654,GO:0008654,GO:0016310	GO:0004143,GO:0005524,GO:0046872		TRUE	-0.378715	0.0505647	0.284001	Chromosome_I	3305695	3306099	405	-	10.625	1730.72	1599.17	1596.9	1371.54	1334.05	1162.78	1066.17	1114.97	1135.16	1800.06	1982.83	2010.06	1673.23	1816.97	1891.86	1882.63	1857.45	1670.94	1473.02	1580.79	2035.41	176.088	163.186	164.575	182.439	170.319	140.532	125.344	119.631
pgaptmp_000127	pgaptmp_000127	pgaptmp_000127	protein_coding	protein_coding		0.5	1000				TRUE	-1.45663	0.0506065	0.284001	pgaptmp_000127	1	1000	1000	+	9.46415	579.734	454.14	690.222	225.494	408.272	366.978	506.356	445.54	184.385	1858.58	371.895	1498.75	122.252	1881.34	2121.1	2895.58	2230.27	2852.36	1826.19	790.075	187.757	23.8884	18.7686	28.8091	12.1479	21.1103	17.9627	24.1095	19.3608
pgaptmp_004266	pgaptmp_004266	hxsC	protein_coding	protein_coding	pgaptmp_004266	0.4361	1158				TRUE	0.362559	0.0509931	0.285866	Chromosome_II	1114087	1115244	1158	+	9.3203	982.156	1030.62	994.083	1105.69	1183.85	824.669	1060.23	1221.69	1221.02	421.763	475.3	394.602	362.337	589.376	386.014	235.961	248.992	227.554	799.657	762.677	874.813	34.9486	36.7816	35.8307	51.4386	52.8607	34.8581	43.5937	45.8448
pgaptmp_003275	pgaptmp_003275	pgaptmp_003275	protein_coding	protein_coding	pgaptmp_003275	0.4752	1248				TRUE	0.351319	0.0511995	0.286717	Chromosome_II	9316	10563	1248	-	5.09654	41.6298	38.7251	26.1386	42.9208	34.1365	39.5841	31.9257	47.7631	52.0782	34.3061	30.8401	25.9363	25.0395	32.1882	25.0316	26.967	29.2931	41.0127	27.3817	32.495	28.2466	1.37451	1.28239	0.874195	1.85275	1.41432	1.55253	1.21803	1.66309
pgaptmp_001653	pgaptmp_001653	pgaptmp_001653	protein_coding	protein_coding	pgaptmp_001653	0.4822	10720	GO:0007154		GO:0016020	TRUE	0.350839	0.0513205	0.287089	Chromosome_I	1729256	1739974	10719	+	10.0072	1203.41	1276.17	1203.19	907.102	904.616	1120.72	1112.94	1070.19	974.003	1279.41	1061.26	1193.07	1175.39	1018.92	1014.44	1063.51	961.347	967.105	788.481	750.571	788.412	4.6257	4.91989	4.68469	4.55854	4.36329	5.11725	4.94323	4.33814
pgaptmp_002619	pgaptmp_002619	pgaptmp_002619	protein_coding	protein_coding	pgaptmp_002619	0.4374	423				TRUE	-0.358821	0.0514349	0.287424	Chromosome_I	2830560	2830982	423	+	9.06946	464.866	498.146	466.41	503.518	528.433	640.768	302.923	273.891	268.836	764.823	562.378	679.901	477.224	570.507	515.124	717.996	671.079	668.109	765.011	662.006	753.519	45.2841	48.6696	46.0224	64.1267	64.5941	74.1469	34.0976	28.1368
pgaptmp_004172	pgaptmp_004172	pgaptmp_004172	protein_coding	protein_coding	pgaptmp_004172	0.4698	1407				TRUE	0.387055	0.0515728	0.287889	Chromosome_II	1011331	1012737	1407	+	6.71269	63.9866	98.5731	96.386	205.635	181.606	169.882	126.96	91.7946	123.862	74.6661	56.2378	79.6614	85.429	77.6955	94.8567	117.98	78.5588	74.0874	174.349	133.803	117.14	1.87393	2.89538	2.85931	7.8735	6.67391	5.90997	4.29642	2.83505
pgaptmp_000616	pgaptmp_000616	aceE	protein_coding	protein_coding	pgaptmp_000616	0.4647	2664	GO:0006086	GO:0004738	GO:0045254	TRUE	-0.820987	0.0517111	0.288009	Chromosome_I	619875	622538	2664	+	15.6879	65479.1	42319.5	36210.1	15956.9	22593.6	10194.6	18219.9	37008.9	33318.8	113823	109188	126573	125179	159324	154510	118673	125811	124843	20204.9	22540.1	43690.8	1012.81	656.521	567.331	322.685	438.525	187.312	325.645	603.684
pgaptmp_003774	pgaptmp_003774	fliI	protein_coding	protein_coding	pgaptmp_003774	0.4945	1353	GO:0044780,GO:0071973	GO:0016887		TRUE	0.3041	0.0517126	0.288009	Chromosome_II	528207	529559	1353	+	6.66229	102.533	79.2105	95.5692	81.9979	94.2167	79.1682	109.141	105.228	119.639	119.062	92.5202	107.45	139.927	112.104	122.523	119.666	115.841	161.405	68.1748	63.0786	73.9395	3.12265	2.41951	2.94823	3.26489	3.60059	2.86408	3.84082	3.37964
[truncated: 4,333 more rows]
[truncated: 14 more columns]
