# Supplementary material for: Phage Resistance in Vibrio harveyi: Evolutionary strategies and physiological trade-offs
Source: Research Square preprint supplement (doi:10.21203/rs.3.rs-7655806/v1), 2025-10-10
Supplement: Supplementary file 4 [file 1ef579f89bf2626a35cc4313.xlsx]

## Sheet: Sheet1
gene_id	transcript_id	gene_name	type	biotypes	description	gc	featWidth	GO BP	GO MF	GO CC	isPresent	log2 Ratio	pValue	fdr	seqnames	start	end	width	strand	log2 Mean	R10D4_1 [normalized count]	R10D4_2 [normalized count]	R10D4_3 [normalized count]	R3D4_1 [normalized count]	R3D4_2 [normalized count]	R3D4_3 [normalized count]	R4D4_1 [normalized count]	R4D4_2 [normalized count]	R4D4_3 [normalized count]	VH2_T10_1 [normalized count]	VH2_T10_2 [normalized count]	VH2_T10_3 [normalized count]	VH2_T25_1 [normalized count]	VH2_T25_2 [normalized count]	VH2_T25_3 [normalized count]	VH2_T45_1 [normalized count]	VH2_T45_2 [normalized count]	VH2_T45_3 [normalized count]	VH2_WT1 [normalized count]	VH2_WT2 [normalized count]	VH2_WT3 [normalized count]	R10D4_1 [FPKM]	R10D4_2 [FPKM]	R10D4_3 [FPKM]	R3D4_1 [FPKM]	R3D4_2 [FPKM]	R3D4_3 [FPKM]	R4D4_1 [FPKM]	R4D4_2 [FPKM]
pgaptmp_000746	pgaptmp_000746	glpD	protein_coding	protein_coding	pgaptmp_000746	0.4705	1560	GO:0006072	GO:0004368	GO:0009331	TRUE	3.74313	4.35144e-09	2.2919e-05	Chromosome_I	781702	783261	1560	-	11.6204	24928.6	22165.7	18683.4	9672.55	8956.73	6257.59	12715.3	13796.1	13225	599.347	1043.12	820.698	1097.32	1301.96	1400.45	996.092	930.723	2669.79	955.565	920.055	981.984	658.462	587.218	499.887	334.026	296.872	196.343	388.093	384.298
pgaptmp_000306	pgaptmp_000306	argC	protein_coding	protein_coding	pgaptmp_000306	0.4657	1005	GO:0006526,GO:0006592	GO:0003942,GO:0070401		TRUE	3.7513	1.80548e-08	2.88087e-05	Chromosome_I	322301	323305	1005	+	12.7476	29874	31210.7	34402.5	24842.8	24187.7	21462.8	42245.1	44671.9	42059.5	2022.04	2000.98	2141.6	1279.96	1428.49	1467.64	2764.11	2520.54	2459.44	2751.02	3287.73	3233.4	1224.86	1283.45	1428.78	1331.68	1244.44	1045.33	2001.44	1931.55
pgaptmp_000765	pgaptmp_000765	argA	protein_coding	protein_coding	pgaptmp_000765	0.4589	1338	GO:0006526	GO:0004042		TRUE	3.52002	1.82346e-08	2.88087e-05	Chromosome_I	811229	812566	1338	-	11.4376	13431	14332.7	15924.1	11941.6	12283	9677.49	18104.1	20529.9	19280.2	641.725	807.284	691.016	500.791	419.556	469.014	810.694	790.915	658.849	1550.7	1778.31	1545.25	413.629	442.704	496.753	480.806	474.67	354.029	644.248	666.758
pgaptmp_002672	pgaptmp_002672	pgaptmp_002672	protein_coding	protein_coding	pgaptmp_002672	0.4587	1524			GO:0016020	TRUE	3.64559	2.72887e-08	2.88087e-05	Chromosome_I	2893073	2894596	1524	-	11.5118	15318.2	20098.3	22140.2	17869.1	16066	21691.3	29606.2	28362.3	25291	484.321	513.396	509.463	391.795	341.86	345.173	487.091	532.602	433.94	2119.57	2341.55	1967.29	414.173	545.026	606.37	631.659	545.088	696.679	924.977	808.712
pgaptmp_004581	pgaptmp_004581	artM	protein_coding	protein_coding	pgaptmp_004581	0.4783	669	GO:0071705	GO:0022857	GO:0016020,GO:0043190	TRUE	3.92799	2.73483e-08	2.88087e-05	Chromosome_II	1470226	1470894	669	-	11.4298	6606.81	7763.51	6876.9	8609.14	11072.5	8061.14	11690.7	16096.2	12957.6	1124.03	1603.68	1526.53	913.206	769.186	839.218	1371.94	1380.77	1386.49	794.069	912.409	870.659	406.934	479.594	429.05	693.263	855.783	589.797	832.048	1045.52
pgaptmp_004584	pgaptmp_004584	artP	protein_coding	protein_coding	pgaptmp_004584	0.4444	729	GO:0003333	GO:0005524,GO:0015424	GO:0043190	TRUE	3.76228	3.94878e-08	3.46637e-05	Chromosome_II	1472402	1473130	729	-	11.4342	9717.48	10265.7	10068.3	12387.4	14036.9	8603.77	15955.4	19130.6	18109.8	1105.87	1364.22	1196.77	673.122	578.277	699.568	620.24	707.03	538.457	1075.15	1225.89	1486.27	549.268	581.972	576.458	915.416	995.607	577.689	1042.11	1140.35
pgaptmp_002671	pgaptmp_002671	pgaptmp_002671	protein_coding	protein_coding	pgaptmp_002671	0.4956	1695				TRUE	2.6329	5.96031e-08	4.07087e-05	Chromosome_I	2891177	2892871	1695	-	9.89031	2756.05	2908.79	2920.17	2556.67	2671.52	2240.62	3308.39	3160.57	3426.61	334.989	301.144	314.94	381.485	389.588	405.776	498.889	446.054	451.139	454.313	575.99	499.3	67.0001	70.9225	71.9084	81.2585	81.4953	64.7042	92.9351	81.0277
pgaptmp_004582	pgaptmp_004582	artQ	protein_coding	protein_coding	pgaptmp_004582	0.4652	690	GO:0055085,GO:0071705	GO:0022857	GO:0016020,GO:0043190	TRUE	4.05128	6.18321e-08	4.07087e-05	Chromosome_II	1470891	1471580	690	-	11.8402	10252.5	11446.8	10426	13449.6	16490.6	12772.5	17487.8	25378.6	20893.9	1307.67	1861.29	1850.74	1048.71	873.52	865.567	1486.55	1491.29	1472.49	1073.47	1262.85	1377.44	612.264	685.609	630.682	1050.08	1235.76	906.063	1206.76	1598.29
pgaptmp_004583	pgaptmp_004583	pgaptmp_004583	protein_coding	protein_coding	pgaptmp_004583	0.4385	732				TRUE	3.91174	7.96185e-08	4.65945e-05	Chromosome_II	1471582	1472313	732	-	11.9509	14981.3	15185.5	14869.6	20458.5	22028.3	13011.6	23045.9	32620.7	30002.7	1172.46	1493.02	1376.48	771.807	762.526	803.647	1075.31	1179.71	891.695	1628.93	1770.66	2105.2	843.331	857.355	847.869	1505.66	1556.01	870.068	1499.05	1936.51
pgaptmp_002372	pgaptmp_002372	pgaptmp_002372	protein_coding	protein_coding	pgaptmp_002372	0.4236	720				TRUE	-1.88105	2.01576e-07	0.00010617	Chromosome_I	2586261	2586980	720	-	9.98723	736.231	903	1063.51	397.818	384.377	436.25	432.853	385.836	395.513	678.049	685.738	694.722	1861.76	1814.75	2204.1	3396.15	3288.82	5080.28	1488.67	1483.3	1416.48	42.1347	51.8319	61.6526	29.7657	27.6038	29.6576	28.6247	23.2867
pgaptmp_002264	pgaptmp_002264	pgaptmp_002264	protein_coding	protein_coding	pgaptmp_002264	0.4384	771				TRUE	1.72244	3.55702e-07	0.000170317	Chromosome_I	2454086	2454856	771	-	8.2783	664.535	680.33	751.484	619.468	652.007	515.418	629.604	654.503	662.238	145.296	190.483	163.028	162.021	160.941	169.952	195.511	223.693	183.895	168.761	198.793	190.249	35.5158	36.4676	40.6824	43.2842	43.7262	32.7219	38.8817	36.8888
pgaptmp_000430	pgaptmp_000430	pgaptmp_000430	protein_coding	protein_coding	pgaptmp_000430	0.4687	1005	GO:0006520,GO:0006591	GO:0004585,GO:0016597		TRUE	3.94477	4.1675e-07	0.000182919	Chromosome_I	463131	464135	1005	-	12.1547	28576.6	24672.3	27236.4	20683.3	21990	12215.8	27487.3	35642.4	34932.5	1138.15	1298.91	1393.15	985.379	895.719	986.773	996.092	1295.56	1006.79	1419.38	2369.59	2378.53	1171.66	1014.58	1131.16	1108.71	1131.37	594.962	1302.26	1541.13
pgaptmp_004890	pgaptmp_004890	pgaptmp_004890	protein_coding	protein_coding	pgaptmp_004890	0.4154	2340				TRUE	-1.93831	6.743e-07	0.000256434	Chromosome_II	1824801	1827140	2340	-	11.0638	3153.07	2970.39	3187.27	3862.87	3795.29	2789.03	1554.71	1861.27	1824.85	1598.26	2289.42	1495.04	830.723	840.222	725.917	1250.59	1351.48	1041.19	6598.43	6002.66	6926.23	55.5235	52.4614	56.8518	88.9321	83.8636	58.3405	31.6348	34.5645
pgaptmp_000309	pgaptmp_000309	argH	protein_coding	protein_coding	pgaptmp_000309	0.4821	1875	GO:0042450	GO:0004056		TRUE	3.46907	6.81616e-07	0.000256434	Chromosome_I	325674	327548	1875	+	12.7254	28040.8	24722.5	21808.6	15109.4	18420.7	9776.45	24665.9	39322.4	34445.5	2244.02	2851.8	2702.93	2705.74	2344.19	2399.08	2969.74	3495.2	3232.06	2307.33	3002.92	3301.53	616.236	544.92	485.475	434.12	507.983	255.219	626.367	911.332
pgaptmp_000429	pgaptmp_000429	pgaptmp_000429	protein_coding	protein_coding	pgaptmp_000429	0.4048	126				TRUE	3.69759	7.57597e-07	0.000266018	Chromosome_I	462936	463061	126	-	8.9824	2439.97	2176.53	2005.32	1784.74	1730.04	758.695	2061.06	3018.77	3012.09	193.728	161.457	224.164	126.671	155.391	159.412	178.656	234.345	190.51	133.556	228.102	225.973	797.944	713.897	664.284	763.076	709.951	294.734	778.849	1041.11
pgaptmp_001179	pgaptmp_001179	pgaptmp_001179	protein_coding	protein_coding	pgaptmp_001179	0.4317	1200	GO:0009372	GO:0061579		TRUE	1.55607	8.59279e-07	0.000269792	Chromosome_I	1256827	1258026	1200	-	10.8653	6058.68	6478.54	6315.74	4047.36	3421.84	2279.38	5488.24	5344.99	5323.24	922.228	722.02	426.096	583.274	947.886	525.664	1248.91	1095.83	624.451	1762.49	1819.08	1729.69	208.044	223.12	219.677	181.7	147.442	92.9756	217.763	193.554
pgaptmp_000750	pgaptmp_000750	glpT	protein_coding	protein_coding	pgaptmp_000750	0.4686	1368	GO:0015794	GO:0015169	GO:0016020	TRUE	1.72813	9.39349e-07	0.000269792	Chromosome_I	787727	789094	1368	+	9.45868	1743.83	1811.28	1674.5	811.01	785.139	1042.38	882.039	850.78	838.881	433.871	741.976	327.909	649.555	437.315	403.141	896.652	969.336	1760.9	215.142	278.438	245.081	52.5262	54.7194	51.0906	31.9378	29.6759	37.2969	30.6997	27.0252
pgaptmp_002758	pgaptmp_002758	pgaptmp_002758	protein_coding	protein_coding	pgaptmp_002758	0.4613	1485				TRUE	2.21007	9.9977e-07	0.000269792	Chromosome_I	2985442	2986926	1485	+	10.7767	10150.7	12932.4	13436.1	4914.11	4113.44	5030.48	10186.5	8376.45	7632.98	193.728	547.865	329.761	366.756	300.793	287.205	283.153	327.55	1793.97	1785.96	1997.49	1688.15	281.663	359.911	377.647	178.272	143.226	165.812	326.612	245.116
pgaptmp_000983	pgaptmp_000983	pgaptmp_000983	protein_coding	protein_coding	pgaptmp_000983	0.4652	948				TRUE	-1.70913	1.06538e-06	0.000269792	Chromosome_I	1039617	1040564	948	-	9.72985	794.821	858.114	893.613	1544.51	1426.22	1167.73	683.061	664.205	593.973	736.571	823.611	629.881	425.672	602.695	578.362	542.71	525.945	523.904	2017.3	1894.27	2292.13	34.5477	37.4092	39.3443	87.7699	77.7898	60.293	34.3071	30.4461
pgaptmp_000757	pgaptmp_000757	pgaptmp_000757	protein_coding	protein_coding	pgaptmp_000757	0.4626	975				TRUE	2.28575	1.06819e-06	0.000269792	Chromosome_I	795635	796609	975	+	9.7855	2793.82	2756.53	3078.64	963.475	751.002	717.462	3777.62	3332.97	3292.89	359.205	400.921	409.423	416.835	390.698	436.077	471.922	484.668	465.692	571.104	834.039	648.01	118.074	116.842	131.794	53.2354	39.8273	36.0186	184.479	148.547
pgaptmp_001902	pgaptmp_001902	pgaptmp_001902	protein_coding	protein_coding	pgaptmp_001902	0.4658	1419				TRUE	1.78913	1.14275e-06	0.000269792	Chromosome_I	2044847	2046265	1419	-	8.78998	2850.1	2921.99	2651.43	1336.31	1238.47	1205.67	2472.38	2544.88	2289.33	72.6481	65.3084	77.8088	79.5373	78.8055	80.3647	101.126	81.2219	109.808	591.78	765.863	678.748	82.763	85.1016	77.99	50.7328	45.1281	41.5889	82.9595	77.933
pgaptmp_003884	pgaptmp_003884	pgaptmp_003884	protein_coding	protein_coding	pgaptmp_003884	0.427	843	GO:0006355	GO:0003700,GO:0043565		TRUE	1.71176	1.14727e-06	0.000269792	Chromosome_II	652806	653648	843	+	10.2996	3294.92	3692.97	3185.64	4187.02	3417.06	4112.62	6110.42	5035.27	5651.19	298.665	319.285	261.215	195.898	213.108	183.126	810.694	501.978	900.956	1557.96	1720.32	1679.01	161.056	181.046	157.728	267.572	209.589	238.794	345.125	259.557
pgaptmp_002263	pgaptmp_002263	pgaptmp_002263	protein_coding	protein_coding	pgaptmp_002263	0.4397	771	GO:0006865		GO:0030288,GO:0055052	TRUE	1.75708	1.17813e-06	0.000269792	Chromosome_I	2453236	2454006	771	-	8.20945	606.716	654.807	624.059	578.47	534.577	493.152	556.843	644.801	686.166	175.566	174.156	194.522	178.223	153.171	137.015	170.229	219.698	174.635	167.084	194.97	164.495	32.4257	35.0995	33.7841	40.4194	35.8509	31.3083	34.3883	36.342
pgaptmp_004064	pgaptmp_004064	pgaptmp_004064	protein_coding	protein_coding	pgaptmp_004064	0.4292	480		GO:0008199,GO:0016491		TRUE	2.28386	1.5131e-06	0.000332063	Chromosome_II	853845	854324	480	+	10.3008	6644.58	7422.03	9069.27	3074.28	2228.43	3142.81	10862.2	7707.76	8546.46	284.538	272.118	224.164	197.37	166.49	155.46	365.74	342.197	288.412	1902.19	1871.33	1602.58	570.407	639.032	788.628	345.038	240.05	320.487	1077.48	697.79
pgaptmp_004891	pgaptmp_004891	pgaptmp_004891	protein_coding	protein_coding	pgaptmp_004891	0.4382	744				TRUE	-1.58214	1.88632e-06	0.00039741	Chromosome_II	1827660	1828403	744	+	8.9503	602.091	622.243	704.925	1176.16	1069.15	1077.84	610.3	586.59	590.454	284.538	246.721	238.984	175.277	173.15	183.126	197.196	246.329	201.094	1891.57	1520.89	1813.6	33.3463	34.5644	39.5468	85.1641	74.3039	70.9112	39.0574	34.2609
pgaptmp_001158	pgaptmp_001158	pgaptmp_001158	protein_coding	protein_coding	pgaptmp_001158	0.4439	669				TRUE	1.87048	1.96925e-06	0.000398924	Chromosome_I	1230056	1230724	669	+	6.44924	471.805	426.857	477.029	271.618	221.204	150.914	511.553	461.212	522.19	14.126	18.1412	33.3466	16.2021	22.1987	18.4444	8.42718	18.6411	17.1989	111.203	115.325	156.187	29.0599	26.3692	29.7618	21.8724	17.0967	11.0417	36.408	29.9579
pgaptmp_002399	pgaptmp_002399	pgaptmp_002399	protein_coding	protein_coding	pgaptmp_002399	0.4892	1200	GO:1901642	GO:0005337,GO:0015293	GO:0005886	TRUE	-1.36708	2.23277e-06	0.000435556	Chromosome_I	2610483	2611682	1200	-	11.4594	1336.01	1422.27	1449.87	1675.19	1913.69	2088.89	1533.92	1497.82	1442.71	5989.43	6144.43	8101.38	5169.93	4082.35	5242.15	2907.38	3292.81	2721.39	3498.15	3873.92	3853.16	45.8761	48.9826	50.4301	75.2051	82.4583	85.2052	60.863	54.2395
pgaptmp_001963	pgaptmp_001963	pgaptmp_001963	protein_coding	protein_coding	pgaptmp_001963	0.4408	735				TRUE	-2.52965	2.42387e-06	0.000436728	Chromosome_I	2123423	2124157	735	-	7.04772	102.533	139.939	156.832	92.8882	96.9476	118.752	83.8977	89.5557	85.1549	66.5941	85.2637	85.2192	110.469	98.7843	102.761	150.004	162.444	116.423	652.131	507.814	379.667	5.74822	7.8685	8.90609	6.80828	6.82014	7.90838	5.43495	5.29473
pgaptmp_001885	pgaptmp_001885	pgaptmp_001885	protein_coding	protein_coding	pgaptmp_001885	0.4575	765		GO:0005524,GO:0016887,GO:0042626,GO:0140359		TRUE	-1.3291	2.51237e-06	0.000436728	Chromosome_I	2025258	2026022	765	-	8.66348	447.906	407.494	548.093	524.018	508.633	531.087	256.148	263.443	282.208	407.637	406.363	305.678	259.233	287.474	283.253	460.124	400.783	362.499	653.249	614.857	716.134	24.1259	22.0141	29.9043	36.9019	34.3785	33.981	15.9427	14.9645
pgaptmp_004379	pgaptmp_004379	pgaptmp_004379	protein_coding	protein_coding	pgaptmp_004379	0.4247	372				TRUE	-2.41818	2.57649e-06	0.000436728	Chromosome_II	1244192	1244563	372	+	6.81617	51.6518	66.0088	62.896	84.5603	62.8111	93.1876	69.0485	62.689	59.1158	62.5581	92.5202	55.5777	106.05	124.313	154.142	261.243	213.041	230.2	451.519	347.251	274.989	5.72138	7.33331	7.05701	12.2458	8.73047	12.2616	8.8378	7.32295
pgaptmp_004892	pgaptmp_004892	pgaptmp_004892	protein_coding	protein_coding	pgaptmp_004892	0.4308	1344				TRUE	-1.58873	2.61401e-06	0.000436728	Chromosome_II	1828406	1829749	1344	+	9.30833	768.61	789.465	853.588	1302.36	1189.31	773.539	590.254	644.055	649.57	371.313	520.653	333.466	243.031	306.342	274.03	358.998	394.126	381.021	1799.93	1619.02	2118.49	23.5649	24.2759	26.5088	52.203	45.7553	28.1719	20.9109	20.8239
pgaptmp_003942	pgaptmp_003942	pgaptmp_003942	protein_coding	protein_coding	pgaptmp_003942	0.4744	156				TRUE	-1.87653	2.67027e-06	0.000436728	Chromosome_II	711570	711725	156	-	6.58601	44.7135	51.0468	48.193	69.1857	79.1966	82.4669	32.6681	26.8667	30.2617	298.665	241.278	229.721	95.7394	122.093	108.031	198.881	190.405	164.051	120.703	105.768	148.71	11.8106	13.5234	12.8944	23.8922	26.2498	25.8754	9.97085	7.48389
pgaptmp_004896	pgaptmp_004896	pgaptmp_004896	protein_coding	protein_coding	pgaptmp_004896	0.432	1176				TRUE	-1.22349	2.75732e-06	0.000436728	Chromosome_II	1831287	1832462	1176	+	8.14478	296.805	328.284	295.693	581.032	464.939	322.445	290.301	292.549	288.541	244.178	214.066	201.932	117.833	133.192	148.872	210.679	178.422	168.02	673.925	628.874	697.026	10.3997	11.5368	10.4948	26.6169	20.4424	13.4209	11.7537	10.8101
pgaptmp_004743	pgaptmp_004743	pgaptmp_004743	protein_coding	protein_coding	pgaptmp_004743	0.4262	1518		GO:0005524,GO:0016887		TRUE	1.21788	2.90916e-06	0.000436728	Chromosome_II	1660506	1662023	1518	-	9.64886	1576.54	1606.21	1441.71	1500.95	1561.4	1180.1	2099.67	2155.31	2205.58	403.601	384.594	301.972	319.622	334.091	276.665	534.283	459.37	392.928	870.067	915.595	894.752	42.7948	43.7294	39.6411	53.2669	53.1847	38.0522	65.8585	61.6986
pgaptmp_005080	pgaptmp_005080	pgaptmp_005080	protein_coding	protein_coding	pgaptmp_005080	0.4566	357				TRUE	1.50564	2.93197e-06	0.000436728	Chromosome_II	2041289	2041645	357	+	5.86922	171.916	168.982	164.183	96.0913	83.293	75.0448	297.725	282.847	244.205	18.162	10.8847	11.1155	14.7291	22.1987	15.8094	25.2815	18.6411	30.4287	87.1744	96.2108	84.7397	19.8429	19.5621	19.1956	14.5004	12.0638	10.2893	39.7082	34.4287
pgaptmp_002619	pgaptmp_002619	pgaptmp_002619	protein_coding	protein_coding	pgaptmp_002619	0.4374	423				TRUE	-1.38965	2.98504e-06	0.000436728	Chromosome_I	2830560	2830982	423	+	9.06946	464.866	498.146	466.41	503.518	528.433	640.768	302.923	273.891	268.836	764.823	562.378	679.901	477.224	570.507	515.124	717.996	671.079	668.109	765.011	662.006	753.519	45.2841	48.6696	46.0224	64.1267	64.5941	74.1469	34.0976	28.1368
pgaptmp_003886	pgaptmp_003886	pgaptmp_003886	protein_coding	protein_coding	pgaptmp_003886	0.4733	300	GO:0009401,GO:0016310	GO:0016301,GO:0022877,GO:0090563,GO:0090582		TRUE	1.40152	3.17176e-06	0.000451504	Chromosome_II	654461	654760	300	-	8.36352	640.637	720.816	615.89	788.589	698.432	578.917	1139.67	920.932	993.708	115.026	125.174	120.418	91.3206	164.271	114.618	143.262	135.814	246.076	358.756	365.728	383.821	87.9931	99.2989	85.6886	141.61	120.378	94.4557	180.88	133.396
pgaptmp_003883	pgaptmp_003883	pgaptmp_003883	protein_coding	protein_coding	pgaptmp_003883	0.4942	1908	GO:0009401	GO:0022877	GO:0016020	TRUE	2.83047	3.40142e-06	0.000471455	Chromosome_II	650516	652423	1908	-	10.5817	2861.67	2081.48	1560.96	2041.62	2343.81	1780.46	2312.75	3540.44	3101.47	1909.03	2663.13	1839.62	838.088	893.499	752.266	1690.49	1149.09	6191.59	302.875	379.109	525.054	61.8015	45.0853	34.1472	57.6449	63.5167	45.6758	57.7144	80.6336
pgaptmp_000307	pgaptmp_000307	argB	protein_coding	protein_coding	pgaptmp_000307	0.4975	792	GO:0006592	GO:0003991	GO:0005737	TRUE	4.18862	3.86093e-06	0.000521423	Chromosome_I	323327	324118	792	+	11.251	14868.8	11207.4	10279	9217.08	9872.95	4787.2	10937.9	20318	18469.5	631.635	760.117	724.363	746.767	591.596	657.409	842.718	930.723	928.738	531.987	939.807	1162.26	773.586	584.819	541.71	626.949	644.563	295.862	657.568	1114.79
pgaptmp_001883	pgaptmp_001883	fhuB	protein_coding	protein_coding	pgaptmp_001883	0.479	1977		GO:0022857	GO:0016020	TRUE	-1.20311	4.43867e-06	0.000573742	Chromosome_I	2022385	2024361	1977	-	9.22992	417.84	433.898	578.316	652.78	785.822	731.481	360.834	369.417	358.214	635.671	798.213	653.965	527.303	520.56	451.887	815.751	817.545	763.365	791.275	769.686	896.413	8.70887	9.07031	12.2095	17.7879	20.5523	18.1104	8.69028	8.11985
pgaptmp_004578	pgaptmp_004578	pgaptmp_004578	protein_coding	protein_coding	pgaptmp_004578	0.446	648				TRUE	1.25827	4.46619e-06	0.000573742	Chromosome_II	1467909	1468556	648	-	6.54396	134.911	183.064	241.782	176.808	160.441	218.537	358.607	334.341	308.95	28.252	23.5836	27.7889	26.5124	41.0676	28.984	45.5068	49.2657	41.0127	135.232	127.431	131.263	8.57891	11.6754	15.5736	14.6991	12.8022	16.5076	26.3497	22.4209
pgaptmp_003887	pgaptmp_003887	pgaptmp_003887	protein_coding	protein_coding	pgaptmp_003887	0.5005	1872	GO:0009401	GO:0022877	GO:0016020	TRUE	1.41265	4.95401e-06	0.000621257	Chromosome_II	654994	656865	1872	+	9.81579	865.746	851.073	831.534	1125.55	919.637	1255.15	1617.81	1372.44	1357.55	714.373	709.322	629.881	729.092	792.495	739.092	1304.53	1033.25	1748.99	491.194	497.62	583.209	19.0565	18.789	18.5402	32.3909	25.4012	32.8187	41.1487	31.8585
pgaptmp_000308	pgaptmp_000308	pgaptmp_000308	protein_coding	protein_coding	pgaptmp_000308	0.4658	1215	GO:0006526	GO:0004055,GO:0005524		TRUE	3.71063	5.35342e-06	0.000648796	Chromosome_I	324209	325423	1215	+	11.6607	20102.6	17591.8	14378.7	15224.7	18203.6	8273.9	12803.7	24123.3	22663.9	734.553	937.901	991.136	793.9	627.114	661.362	955.642	1007.95	1018.7	984.624	1497.96	1924.09	681.764	598.377	493.951	675.051	774.685	333.324	501.754	862.777
pgaptmp_001876	pgaptmp_001876	pgaptmp_001876	protein_coding	protein_coding	pgaptmp_001876	0.4732	1344				TRUE	-1.33838	5.41998e-06	0.000648796	Chromosome_I	2010696	2012039	1344	+	8.416	242.07	235.871	252.401	172.964	261.485	206.992	185.614	149.26	158.346	720.427	881.663	1044.86	397.687	438.425	694.298	296.637	348.855	428.648	426.931	395.038	417.883	7.42163	7.253	7.83849	6.933	10.0599	7.53853	6.57575	4.82592
pgaptmp_000297	pgaptmp_000297	bfr	protein_coding	protein_coding	pgaptmp_000297	0.4403	477	GO:0006879,GO:0006880	GO:0004322,GO:0008199		TRUE	-1.52791	6.16485e-06	0.000706865	Chromosome_I	309674	310150	477	+	9.14739	378.523	296.599	330.816	556.048	538.673	663.034	236.101	219.412	253.353	768.859	702.065	798.467	785.063	734.778	791.79	1156.21	1139.77	859.943	780.658	590.645	645.517	32.6988	25.6977	28.9474	62.7998	58.3917	68.0377	23.5675	19.9884
pgaptmp_001897	pgaptmp_001897	pgaptmp_001897	protein_coding	protein_coding	pgaptmp_001897	0.4514	627				TRUE	1.28939	6.1735e-06	0.000706865	Chromosome_I	2038632	2039258	627	-	8.21266	624.447	839.631	825.816	694.42	728.472	513.769	671.924	600.77	687.573	203.818	132.431	138.944	159.075	186.469	135.698	106.182	86.5479	105.839	271.023	261.235	231.788	41.038	55.343	54.9739	59.6649	60.0744	40.1082	51.0253	41.6369
pgaptmp_004660	pgaptmp_004660	pgaptmp_004660	protein_coding	protein_coding	pgaptmp_004660	0.4356	264				TRUE	1.89497	6.35153e-06	0.000711776	Chromosome_II	1575391	1575654	264	-	8.06012	972.905	1136.23	972.846	707.872	608.312	696.845	2300.13	1509.76	1626.39	62.5581	54.4236	68.5459	32.4041	46.6173	47.4283	69.1029	45.2712	76.7334	468.283	479.779	453.607	151.853	177.871	153.809	144.449	119.142	129.201	414.841	248.509
pgaptmp_004145	pgaptmp_004145	pgaptmp_004145	protein_coding	protein_coding	pgaptmp_004145	0.4605	519	GO:0033103			TRUE	-2.64757	7.00774e-06	0.000768954	Chromosome_II	980332	980850	519	+	7.58798	76.3214	88.8918	115.173	154.387	161.124	262.245	412.806	297.773	263.206	155.386	170.527	81.514	122.252	132.082	82.9996	67.4174	74.5643	43.6586	2552.64	1903.83	1551.07	6.0595	7.07841	9.26243	16.0253	16.0523	24.7327	37.8714	24.9319
pgaptmp_002026	pgaptmp_002026	pgaptmp_002026	protein_coding	protein_coding	pgaptmp_002026	0.4439	579		GO:0004797,GO:0005524		TRUE	-1.12126	7.94116e-06	0.00083721	Chromosome_I	2192174	2192752	579	-	10.731	874.997	945.246	822.549	1351.68	1382.53	1194.94	633.316	638.085	696.018	3174.32	2782.86	3040.1	3679.34	3518.5	3551.86	3994.48	3923.95	3057.43	1371.88	1312.54	1488.76	62.2711	67.4695	59.2958	125.765	123.464	101.019	52.0804	47.8892
pgaptmp_004894	pgaptmp_004894	pgaptmp_004894	protein_coding	protein_coding	pgaptmp_004894	0.4167	408		GO:0022857	GO:0016020	TRUE	-1.61548	7.94769e-06	0.00083721	Chromosome_II	1830245	1830652	408	+	7.33661	229.735	183.064	189.505	320.304	347.509	229.258	124.733	167.171	152.012	151.35	146.944	133.387	66.2811	78.8055	80.3647	70.7883	70.5698	55.5655	459.342	388.029	514.254	23.202	18.5432	19.3866	42.2928	44.0403	27.5041	14.5564	17.8048
pgaptmp_000751	pgaptmp_000751	glpQ	protein_coding	protein_coding	pgaptmp_000751	0.4593	1056	GO:0006629	GO:0008081		TRUE	1.11758	8.87424e-06	0.000907438	Chromosome_I	789148	790203	1056	+	8.73395	925.878	859.874	893.613	465.082	423.292	402.438	394.245	458.227	444.776	393.511	542.422	329.761	380.012	341.86	268.761	487.091	544.586	769.98	181.054	195.607	191.911	36.1284	33.6521	35.3205	23.7263	20.7262	18.6538	17.776	18.8562
pgaptmp_001178	pgaptmp_001178	pgaptmp_001178	protein_coding	protein_coding	pgaptmp_001178	0.4553	2550	GO:0000160			TRUE	1.12943	8.95895e-06	0.000907438	Chromosome_I	1254285	1256834	2550	-	10.8241	4250.1	4487.72	3790.1	3075.56	3046.34	2158.98	3127.97	3485.96	3484.31	1319.77	1329.75	807.73	1079.65	1287.53	808.917	1162.95	994.635	780.564	1441.17	1478.21	1544.42	68.6779	72.7322	62.037	64.9753	61.7706	41.4421	58.4057	59.4045
pgaptmp_004181	pgaptmp_004181	pgaptmp_004181	protein_coding	protein_coding	pgaptmp_004181	0.4566	1428	GO:0055085	GO:0022857		TRUE	1.07065	9.3679e-06	0.000930957	Chromosome_II	1020486	1021913	1428	+	7.9636	279.845	339.725	308.762	397.818	355.019	393.367	508.583	503.005	464.481	117.044	121.546	163.028	220.937	134.302	172.586	188.769	186.411	222.262	208.995	229.377	232.619	8.07509	9.83198	9.02478	15.0079	12.8549	13.4835	16.9577	15.3067
pgaptmp_004489	pgaptmp_004489	pgaptmp_004489	protein_coding	protein_coding	pgaptmp_004489	0.4304	1545	GO:0000160			TRUE	1.10721	1.11545e-05	0.00107495	Chromosome_II	1365369	1366913	1545	+	8.94583	1008.37	1130.95	1149.28	1180	985.179	840.337	1424.03	1367.22	1439.19	223.998	174.156	207.49	206.208	179.81	191.031	242.703	182.416	148.175	666.661	642.255	581.547	26.8936	30.2522	31.0484	41.1451	32.9709	26.6231	43.8858	38.4545
pgaptmp_001159	pgaptmp_001159	pgaptmp_001159	protein_coding	protein_coding	pgaptmp_001159	0.4531	384				TRUE	1.72379	1.12674e-05	0.00107495	Chromosome_I	1230749	1231132	384	+	6.65624	466.408	364.368	433.737	320.945	261.485	153.388	455.869	463.451	453.221	26.234	18.1412	14.8207	13.2562	27.7484	30.3014	37.0796	38.6137	37.0437	94.9977	138.263	157.018	50.0487	39.2149	47.1451	45.026	35.2095	19.5521	56.5251	52.4457
pgaptmp_002262	pgaptmp_002262	pgaptmp_002262	protein_coding	protein_coding	pgaptmp_002262	0.4453	741				TRUE	1.22826	1.14291e-05	0.00107495	Chromosome_I	2452414	2453154	741	-	8.36033	549.668	549.193	537.475	451.629	495.662	411.51	503.386	579.127	481.372	248.214	283.003	264.921	201.789	202.008	258.221	254.501	271.627	247.399	219.612	219.819	195.234	30.5661	30.6301	30.2748	32.8343	34.5868	27.1828	32.3456	33.962
pgaptmp_005055	pgaptmp_005055	fusA	protein_coding	protein_coding	pgaptmp_005055	0.482	2025	GO:0006414	GO:0003746		TRUE	1.15037	1.19717e-05	0.00109084	Chromosome_II	2019656	2021680	2025	+	7.69868	285.241	246.433	228.713	327.992	335.903	226.784	357.122	411.21	434.22	145.296	137.873	170.438	110.469	138.742	152.825	134.835	171.764	175.958	169.319	179.678	164.495	5.80425	5.02939	4.71418	8.72573	8.57694	5.48176	8.397	8.82422
pgaptmp_003070	pgaptmp_003070	rph	protein_coding	protein_coding	pgaptmp_003070	0.5049	717	GO:0008033	GO:0000049,GO:0009022		TRUE	-1.11188	1.20719e-05	0.00109084	Chromosome_I	3320855	3321571	717	-	12.4303	4468.27	4589.81	4869.95	6440.68	6268.14	5901.33	3554.14	3525.51	3546.95	7163.91	9317.33	8292.2	6305.54	6134.62	6725.6	3311.88	4411.28	4154.19	7328.24	7650.35	7304.23	256.79	264.556	283.495	483.923	452.026	402.869	236.02	213.668
pgaptmp_000805	pgaptmp_000805	pgaptmp_000805	protein_coding	protein_coding	pgaptmp_000805	0.465	1587				TRUE	-1.20654	1.22194e-05	0.00109084	Chromosome_I	850388	851974	1587	+	11.4985	1364.53	1336.9	1530.74	1941.04	2224.33	2681.82	1565.1	1406.77	1397.67	4205.52	3963.86	4096.08	5420.32	4869.29	5418.69	5066.42	4937.22	5765.59	3468.53	3313.86	3011.58	35.4295	34.8147	40.2593	65.8905	72.4714	82.7153	46.9567	38.5198
pgaptmp_003276	pgaptmp_003276	pgaptmp_003276	protein_coding	protein_coding	pgaptmp_003276	0.4736	1005	GO:0006355	GO:0003677,GO:0003700		TRUE	1.28899	1.28347e-05	0.00112667	Chromosome_II	10586	11590	1005	-	5.24917	84.0306	58.0877	68.6138	63.4202	46.4256	47.8308	101.717	94.7798	116.824	8.07201	29.0259	12.9681	14.7291	23.3087	14.492	21.9107	22.6356	35.7207	34.0874	40.7781	37.3852	3.44532	2.38869	2.84962	3.39959	2.38856	2.32956	4.81902	4.09814
pgaptmp_000764	pgaptmp_000764	pgaptmp_000764	protein_coding	protein_coding	pgaptmp_000764	0.4086	186				TRUE	1.63173	1.35213e-05	0.00115529	Chromosome_I	810791	810976	186	-	8.04631	696.914	595.839	806.212	838.557	518.192	437.074	645.938	634.353	846.623	155.386	97.9626	116.713	73.6457	78.8055	90.9043	168.544	145.134	130.976	253.141	205.165	191.08	154.392	132.391	180.916	242.875	144.053	115.02	165.352	148.203
pgaptmp_001884	pgaptmp_001884	pgaptmp_001884	protein_coding	protein_coding	pgaptmp_001884	0.4633	885				TRUE	-1.37056	1.35994e-05	0.00115529	Chromosome_I	2024361	2025245	885	-	8.19574	259.801	184.825	239.331	323.507	440.36	331.517	158.886	171.649	193.534	320.863	350.125	333.466	247.45	271.934	208.158	377.538	330.213	361.176	417.431	399.498	530.869	12.0964	8.63094	11.2875	19.6927	25.7282	18.3356	8.5482	8.42819
pgaptmp_003649	pgaptmp_003649	pgaptmp_003649	protein_coding	protein_coding	pgaptmp_003649	0.4778	1557				TRUE	-2.32229	1.44256e-05	0.00120603	Chromosome_II	405953	407509	1557	-	8.44297	169.603	168.102	214.827	326.71	279.919	200.394	135.127	150.752	178.755	512.573	426.319	420.538	413.889	508.351	407.093	557.879	536.597	541.103	941.036	867.171	517.577	4.48852	4.46197	5.75891	11.3042	9.29582	6.29985	4.13225	4.20739
pgaptmp_005044	pgaptmp_005044	pgaptmp_005044	protein_coding	protein_coding	pgaptmp_005044	0.4478	498				TRUE	-1.70944	1.46589e-05	0.00120638	Chromosome_II	2005371	2005868	498	+	8.18556	186.563	183.064	169.901	638.046	558.473	560.775	279.164	253.741	274.466	258.304	330.17	203.785	92.7936	174.26	165.999	256.186	179.753	170.666	1086.89	697.687	815.827	15.4367	15.192	14.2399	69.0219	57.9851	55.1178	26.6909	22.1411
pgaptmp_002637	pgaptmp_002637	bamE	protein_coding	protein_coding	pgaptmp_002637	0.4278	360				TRUE	-1.41118	1.51882e-05	0.00123071	Chromosome_I	2854538	2854897	360	+	10.4668	998.345	1200.48	893.613	1759.11	1396.18	1885.19	849.371	664.951	782.581	1783.92	1358.78	1650.66	1087.01	1459.57	1312.18	2472.53	2146.39	1943.47	2207.3	1729.24	2013.81	114.271	137.814	103.607	263.242	200.532	256.322	112.338	80.2647
pgaptmp_000269	pgaptmp_000269	pgaptmp_000269	protein_coding	protein_coding	pgaptmp_000269	0.4813	588				TRUE	-1.22445	1.55869e-05	0.00124388	Chromosome_I	284073	284660	588	+	9.20271	431.717	503.427	560.346	593.844	576.906	814.773	354.152	325.386	323.729	865.724	908.875	855.897	608.313	702.59	685.076	524.17	505.972	492.152	864.479	681.121	751.857	30.2538	35.3835	39.7759	54.4076	50.7308	67.8253	28.6778	24.0469
pgaptmp_003882	pgaptmp_003882	manA	protein_coding	protein_coding	pgaptmp_003882	0.4655	1233	GO:0005975	GO:0004476,GO:0008270		TRUE	1.47751	1.65078e-05	0.0012758	Chromosome_II	649206	650438	1233	-	8.45735	572.025	425.096	282.623	575.266	491.565	345.536	455.869	629.129	549.636	484.321	515.211	361.255	200.316	246.406	181.809	247.759	187.742	1091.47	202.289	160.564	192.741	19.1166	14.2484	9.56723	25.1345	20.614	13.7171	17.6039	22.1725
pgaptmp_002169	pgaptmp_002169	pgaptmp_002169	protein_coding	protein_coding	pgaptmp_002169	0.4036	441				TRUE	-1.07124	1.66779e-05	0.0012758	Chromosome_I	2352114	2352554	441	-	8.00806	437.113	328.284	472.128	329.273	291.525	229.258	286.589	313.445	347.657	167.494	150.572	185.259	82.4832	77.6955	104.079	205.623	248.992	186.541	670.013	623.777	657.979	40.8426	30.7647	44.6851	40.2237	34.1808	25.4459	30.9423	30.8859
pgaptmp_004183	pgaptmp_004183	pgaptmp_004183	protein_coding	protein_coding	pgaptmp_004183	0.441	873				TRUE	1.11171	1.67135e-05	0.0012758	Chromosome_II	1023376	1024248	873	+	6.4298	148.017	147.86	142.129	134.528	115.381	141.018	227.192	198.515	229.426	38.3421	34.4683	42.6096	48.6062	65.4862	42.1585	35.3941	45.2712	46.3046	94.9977	86.6534	101.355	6.98644	6.99966	6.79529	8.3016	6.83384	7.90668	12.3911	9.88137
pgaptmp_003725	pgaptmp_003725	fni	protein_coding	protein_coding	pgaptmp_003725	0.4863	1020	GO:0008299	GO:0004452,GO:0010181		TRUE	-0.994153	1.7354e-05	0.00130576	Chromosome_II	484548	485567	1020	+	8.78468	185.021	156.661	185.421	292.118	388.473	373.575	223.48	221.65	226.611	1091.74	1021.35	1163.43	798.319	802.484	814.186	566.306	637.791	612.544	401.785	435.816	481.022	7.47447	6.34749	7.5875	15.4284	19.6927	17.9271	10.4321	9.44291
pgaptmp_000303	pgaptmp_000303	pgaptmp_000303	protein_coding	protein_coding	pgaptmp_000303	0.4685	540		GO:0003677		TRUE	-1.76118	1.76421e-05	0.00130874	Chromosome_I	317130	317669	540	-	12.7253	2176.31	2408.88	2967.55	4400.98	3883.36	5122.84	3932.8	3362.82	3265.44	8802.53	9950.46	12030.7	10974.7	13433.6	14451.2	10397.5	11349.8	11975.7	14249.1	10552.6	9882.15	166.068	184.358	229.374	439.056	371.842	464.355	346.769	270.612
pgaptmp_003570	pgaptmp_003570	pgaptmp_003570	protein_coding	protein_coding	pgaptmp_003570	0.4463	726				TRUE	-1.25579	1.81927e-05	0.00133085	Chromosome_II	323717	324442	726	-	7.87872	74.0086	83.6111	62.896	174.886	185.702	332.341	115.081	105.228	111.194	306.737	277.561	359.403	338.77	347.41	436.077	682.601	786.92	656.203	303.993	254.863	235.111	4.20053	4.75958	3.61599	12.9773	13.2259	22.4068	7.54743	6.29843
pgaptmp_001567	pgaptmp_001567	pgaptmp_001567	protein_coding	protein_coding	pgaptmp_001567	0.4115	384				TRUE	2.37422	1.87308e-05	0.00134493	Chromosome_I	1627314	1627697	384	-	10.698	2719.04	3514.31	4085.79	2595.11	2681.08	4248.69	5131.86	3680.74	3661.66	918.192	1101.17	980.021	820.413	897.939	873.472	1505.09	1326.18	988.273	1032.12	692.59	583.209	291.772	378.225	444.105	364.073	361.012	541.573	636.322	416.525
pgaptmp_004580	pgaptmp_004580	pgaptmp_004580	protein_coding	protein_coding	pgaptmp_004580	0.4607	573				TRUE	1.77674	1.88959e-05	0.00134493	Chromosome_II	1469515	1470087	573	-	6.74884	107.929	115.295	101.287	112.747	118.112	92.3629	120.278	158.961	169.606	157.404	107.033	155.618	86.9019	86.575	114.618	210.679	214.372	141.56	38.5579	28.6721	45.693	7.76144	8.3157	7.37802	10.6002	10.6582	7.88998	9.99458	12.0552
pgaptmp_000270	pgaptmp_000270	pgaptmp_000270	protein_coding	protein_coding	pgaptmp_000270	0.4901	1212		GO:0030170		TRUE	1.48205	1.93177e-05	0.00135662	Chromosome_I	285022	286233	1212	+	10.4077	2449.22	2360.47	2306.73	2022.4	2312.4	1477.81	2438.23	3619.54	3221.81	589.257	821.797	735.479	768.861	781.395	802.329	1031.49	1018.6	1059.71	1028.77	1099.1	1079.19	83.2691	80.4893	79.4392	89.8936	98.6518	59.6826	95.7866	129.774
pgaptmp_004237	pgaptmp_004237	cyoD	protein_coding	protein_coding	pgaptmp_004237	0.4519	312	GO:0015990	GO:0009486	GO:0016020	TRUE	1.17344	2.00825e-05	0.00139177	Chromosome_II	1088911	1089222	312	+	12.9099	3479.95	3621.68	4431.31	3825.07	4183.08	5996.99	8273.2	8991.4	7849.03	16073.4	17609.7	16919.7	12359.2	9158.08	9388.18	19655.5	15430.8	18267.8	3537.27	3839.51	3403.71	459.596	479.73	592.814	660.464	693.243	940.831	1262.56	1252.3
pgaptmp_004017	pgaptmp_004017	pgaptmp_004017	protein_coding	protein_coding	pgaptmp_004017	0.475	579				TRUE	1.07844	2.06267e-05	0.00141092	Chromosome_II	785015	785593	579	-	11.8079	3706.6	4398.82	3705.96	4195.35	4143.48	4987.6	5444.44	6134.57	5390.8	3460.88	4029.16	4096.08	2785.28	2394.13	2590.11	3013.56	2934.64	3060.07	2617.47	2577.94	2582.9	263.788	313.978	267.155	390.349	370.025	421.644	447.721	460.408
pgaptmp_002094	pgaptmp_002094	pgaptmp_002094	protein_coding	protein_coding	pgaptmp_002094	0.4749	777		GO:0016491,GO:0070403		TRUE	1.16269	2.1598e-05	0.00145842	Chromosome_I	2270531	2271307	777	-	8.95787	1450.88	1521.72	1637.75	802.683	646.545	763.643	1691.32	1513.49	1502.53	137.224	186.855	233.426	144.346	179.81	169.952	187.083	213.041	226.231	583.398	746.748	698.687	76.9427	80.9386	87.9764	55.6528	43.0251	48.1063	103.642	84.6441
pgaptmp_003885	pgaptmp_003885	pgaptmp_003885	protein_coding	protein_coding	pgaptmp_003885	0.4801	777				TRUE	1.16677	2.19452e-05	0.00146311	Chromosome_II	653672	654448	777	-	9.26396	1017.62	955.807	951.608	1418.95	1268.51	964.862	1406.96	1547.08	1514.49	298.665	297.516	270.478	235.666	315.222	266.126	332.031	291.6	559.624	547.634	642.255	731.088	53.9662	50.8383	51.1185	98.3806	84.4145	60.7823	86.2169	86.5223
pgaptmp_000747	pgaptmp_000747	pgaptmp_000747	protein_coding	protein_coding	pgaptmp_000747	0.4394	792				TRUE	0.968238	2.26059e-05	0.0014666	Chromosome_I	783442	784233	792	-	10.5187	2338.21	2737.16	2770.69	2177.43	2156.06	1919.83	2371.41	2238.89	2381.52	990.84	968.741	954.084	873.438	955.655	1001.26	1109.02	1099.82	1072.94	1086.33	1223.98	1143.99	121.651	142.829	146.017	148.11	140.76	118.651	142.565	122.842
pgaptmp_000800	pgaptmp_000800	pgaptmp_000800	protein_coding	protein_coding	pgaptmp_000800	0.4604	669				TRUE	-1.15335	2.26193e-05	0.0014666	Chromosome_I	846285	846953	669	-	8.45316	249.779	284.278	272.005	253.681	223.935	230.083	292.528	262.697	259.687	302.701	341.055	324.203	481.643	478.383	495.363	396.077	424.75	384.99	668.337	546.681	564.931	15.3847	17.5614	16.9704	20.428	17.3077	16.8341	20.8197	17.0634
pgaptmp_001532	pgaptmp_001532	pgaptmp_001532	protein_coding	protein_coding	pgaptmp_001532	0.4119	471				TRUE	1.21735	2.28329e-05	0.0014666	Chromosome_I	1590531	1591001	471	+	9.26115	1110.13	1357.14	1453.96	1332.47	1374.33	1845.61	1876.19	1737.38	1656.65	278.484	212.252	257.51	313.731	207.558	216.062	202.252	280.948	181.249	764.452	791.987	626.409	97.1204	119.082	128.846	152.405	150.874	191.801	189.666	160.292
pgaptmp_003729	pgaptmp_003729	pgaptmp_003729	protein_coding	protein_coding	pgaptmp_003729	0.4146	246				TRUE	1.50574	2.44245e-05	0.00153368	Chromosome_II	487726	487971	246	+	7.79819	310.682	364.368	325.916	653.421	579.637	750.448	857.538	595.546	669.275	70.6301	126.989	66.6933	50.0791	62.1564	47.4283	239.332	159.781	108.485	264.317	234.474	211.018	52.0402	61.2135	55.2982	143.094	121.833	149.32	165.978	105.2
pgaptmp_004373	pgaptmp_004373	pgaptmp_004373	protein_coding	protein_coding	pgaptmp_004373	0.4479	960	GO:0009966	GO:0009975		TRUE	1.01023	2.44597e-05	0.00153368	Chromosome_II	1238223	1239182	960	-	9.21244	763.984	786.824	731.88	956.429	902.568	777.662	1311.92	1342.59	1402.59	425.799	346.497	407.57	341.716	404.017	350.443	353.941	308.909	265.921	572.222	672.201	699.518	32.7923	33.8726	31.8207	53.6717	48.613	39.6509	65.0683	60.7728
pgaptmp_004466	pgaptmp_004466	pgaptmp_004466	protein_coding	protein_coding	pgaptmp_004466	0.3333	357				TRUE	1.12969	2.4805e-05	0.00153704	Chromosome_II	1333822	1334178	357	-	9.11714	469.492	526.31	515.42	774.496	773.532	863.428	994.893	1041.83	997.227	433.871	493.441	531.694	544.978	374.049	382.062	458.438	430.076	404.835	415.755	512.912	403.76	54.1899	60.9277	60.2607	116.873	112.035	118.383	132.691	126.814
pgaptmp_003877	pgaptmp_003877	pgaptmp_003877	protein_coding	protein_coding	pgaptmp_003877	0.4429	858				TRUE	0.859546	2.51831e-05	0.00154232	Chromosome_II	644351	645208	858	+	9.16904	693.83	687.371	637.945	905.821	922.367	928.577	1150.07	1141.84	1157.68	369.295	460.787	387.192	410.943	300.793	262.173	347.2	342.197	424.679	601.28	614.22	618.101	33.3215	33.109	31.0339	56.8747	55.5854	52.9741	63.8217	57.8301
pgaptmp_000204	pgaptmp_000204	pgaptmp_000204	protein_coding	protein_coding	pgaptmp_000204	0.4529	510				TRUE	-1.54723	2.5829e-05	0.00154796	Chromosome_I	222218	222727	510	+	8.62151	281.387	354.687	445.99	338.241	330.441	534.385	498.931	405.24	365.251	201.8	261.234	214.901	312.258	235.307	301.697	320.233	387.468	283.12	1427.2	1144.97	1057.58	22.7348	28.742	36.5002	35.729	33.5018	51.2882	46.5804	34.5286
pgaptmp_004152	pgaptmp_004152	tssA	protein_coding	protein_coding	pgaptmp_004152	0.4569	1578				TRUE	-1.2331	2.58631e-05	0.00154796	Chromosome_II	989039	990616	1578	+	7.4582	110.242	99.4532	96.386	181.933	187.751	183.901	227.192	258.219	270.244	135.206	156.014	124.124	103.104	134.302	100.126	133.149	139.808	88.6403	505.723	558.787	687.887	2.87871	2.60467	2.54946	6.2111	6.15203	5.7044	6.85518	7.1108
pgaptmp_004016	pgaptmp_004016	pgaptmp_004016	protein_coding	protein_coding	pgaptmp_004016	0.4296	135				TRUE	0.959524	2.62856e-05	0.00155558	Chromosome_II	784865	784999	135	-	9.84635	878.852	848.433	847.87	1091.6	759.195	1014.34	1164.92	1317.96	1163.31	1156.32	908.875	1217.15	656.92	749.207	798.377	1235.42	1129.12	1180.11	608.544	584.273	614.778	268.25	259.732	262.142	435.605	290.779	367.776	410.86	424.235
pgaptmp_001019	pgaptmp_001019	rnt	protein_coding	protein_coding	pgaptmp_001019	0.4512	645	GO:0006364,GO:0042780	GO:0016896		TRUE	-0.984853	2.67205e-05	0.00156375	Chromosome_I	1080286	1080930	645	-	11.1273	1585.79	1446.91	1649.18	1673.27	1455.58	1340.09	1090.67	1053.77	1184.43	4467.86	3646.38	3883.03	3786.86	4203.33	4454.31	2929.29	3405.99	2987.31	2003.33	2086.05	2319.54	101.308	92.7095	106.721	139.756	116.686	101.696	80.5131	70.9945
pgaptmp_001047	pgaptmp_001047	pgaptmp_001047	protein_coding	protein_coding	pgaptmp_001047	0.4737	1275				TRUE	0.995075	2.84494e-05	0.00164111	Chromosome_I	1109675	1110949	1275	+	8.15849	494.932	535.991	574.232	257.525	268.995	374.4	536.054	469.421	470.815	147.314	170.527	163.028	197.37	178.7	192.348	306.749	248.992	267.244	227.995	253.589	225.973	15.9954	17.3736	18.7983	10.8811	10.9088	14.3733	20.0185	15.9989
pgaptmp_004893	pgaptmp_004893	pgaptmp_004893	protein_coding	protein_coding	pgaptmp_004893	0.4464	513	GO:0015031		GO:0005886	TRUE	-1.31708	2.90513e-05	0.00164111	Chromosome_II	1829743	1830255	513	+	7.951	324.558	311.561	334.084	492.628	451.967	294.407	266.542	280.608	259.687	171.53	214.066	179.701	98.6852	129.863	105.396	119.666	111.846	116.423	759.423	532.026	686.225	26.0696	25.0997	27.1818	51.7328	45.5547	28.0907	24.739	23.7695
pgaptmp_004396	pgaptmp_004396	pgaptmp_004396	protein_coding	protein_coding	pgaptmp_004396	0.4615	1014	GO:0006355	GO:0003700,GO:0043565		TRUE	0.872345	2.94197e-05	0.00164111	Chromosome_II	1260852	1261865	1014	-	8.0689	471.034	509.588	490.915	398.459	346.827	348.01	585.799	608.233	593.973	133.188	103.405	111.155	120.779	145.402	163.364	188.769	175.759	174.635	292.258	324.95	320.682	19.1413	20.7693	20.2074	21.1694	17.6855	16.7991	27.507	26.0657
pgaptmp_004312	pgaptmp_004312	focA	protein_coding	protein_coding	pgaptmp_004312	0.4442	1452	GO:0015724	GO:0015499	GO:0005886	TRUE	1.45291	2.94938e-05	0.00164111	Chromosome_II	1167435	1168886	1452	-	11.6379	41065.5	38359.9	45677.2	53121.8	47145.2	37002.9	71352.4	79334.4	77673.2	121.08	97.9626	77.8088	51.552	91.0148	105.396	143.262	98.5314	92.6092	22800	28861.3	29269.3	1165.38	1091.82	1313.03	1970.93	1678.86	1247.39	2339.78	2374.28
pgaptmp_000111	pgaptmp_000111	pgaptmp_000111	protein_coding	protein_coding	pgaptmp_000111	0.4881	795				TRUE	-1.02154	2.96005e-05	0.00164111	Chromosome_I	116286	117080	795	+	10.4712	1204.95	1386.18	1493.17	1677.11	1648.11	1809.32	1236.93	1264.97	1163.31	1093.76	1532.93	1307.93	1035.46	1041.12	1024.98	1321.38	1336.83	1141.74	2519.12	2502.12	2207.39	62.4541	72.0602	78.3939	113.647	107.192	111.399	74.0819	69.1436
pgaptmp_002502	pgaptmp_002502	pgaptmp_002502	protein_coding	protein_coding	pgaptmp_002502	0.4635	507				TRUE	-1.24208	3.05294e-05	0.00167274	Chromosome_I	2718999	2719505	507	+	8.63578	323.017	321.243	294.876	364.506	372.088	288.634	201.948	239.562	249.835	530.735	449.902	498.347	621.57	642.653	678.489	362.369	442.06	324.132	476.106	503.991	635.548	26.2528	26.1859	24.2757	38.7312	37.9473	27.8659	18.9655	20.5327
pgaptmp_001714	pgaptmp_001714	pgaptmp_001714	protein_coding	protein_coding	pgaptmp_001714	0.4506	1032				TRUE	-0.976084	3.08061e-05	0.00167274	Chromosome_I	1810228	1811259	1032	+	10.7756	1445.48	1389.7	1333.07	1651.49	1798.31	1521.51	963.71	1040.34	1032.42	3410.43	3784.26	3301.32	1637.88	2279.81	2144.81	1687.12	1633.76	1529.38	2004.45	1764.93	2039.57	57.7153	55.6525	53.9155	86.2105	90.1008	72.1654	44.463	43.8059
pgaptmp_003730	pgaptmp_003730	pgaptmp_003730	protein_coding	protein_coding	pgaptmp_003730	0.4194	453				TRUE	1.24909	3.15027e-05	0.0016841	Chromosome_II	488112	488564	453	+	8.10311	272.136	321.243	353.688	773.215	505.22	899.713	774.383	613.457	693.907	153.368	70.7507	92.6295	89.8477	106.554	94.8567	328.66	254.318	260.629	270.464	319.853	245.911	24.754	29.3074	32.5884	91.953	57.6668	97.2162	81.3936	58.8469
pgaptmp_002664	pgaptmp_002664	pgaptmp_002664	protein_coding	protein_coding	pgaptmp_002664	0.4768	1269	GO:0019346	GO:0016765,GO:0030170		TRUE	1.18604	3.16548e-05	0.0016841	Chromosome_I	2882852	2884120	1269	-	8.75623	650.659	608.161	632.227	481.097	516.826	464.288	624.407	717.192	755.134	355.169	333.798	350.14	352.026	303.013	355.713	389.336	396.789	362.499	264.876	340.879	275.819	21.1276	19.8061	20.7947	20.4237	21.0585	17.9085	23.4282	24.559
pgaptmp_002184	pgaptmp_002184	pgaptmp_002184	protein_coding	protein_coding	pgaptmp_002184	0.4297	861	GO:0006355	GO:0003700,GO:0043565		TRUE	-1.20606	3.23582e-05	0.00170431	Chromosome_I	2365115	2365975	861	-	10.6417	2316.62	2099.96	2110.69	2433.67	2759.59	2645.54	1456.7	1371.7	1484.93	918.192	1028.61	1005.96	525.83	674.841	765.441	1786.56	1485.96	1520.11	3529.45	2683.71	3455.22	110.869	100.797	102.32	152.273	165.724	150.398	80.5564	69.2296
pgaptmp_003484	pgaptmp_003484	pgaptmp_003484	protein_coding	protein_coding	pgaptmp_003484	0.465	1086	GO:0007165		GO:0016020	TRUE	0.899292	3.35285e-05	0.00174846	Chromosome_II	230972	232057	1086	-	8.32015	319.933	396.053	322.648	680.326	593.292	521.191	648.165	614.203	589.047	215.926	179.598	170.438	194.425	202.008	126.476	311.806	258.312	215.647	316.287	331.959	304.066	12.1391	15.0718	12.4005	33.7483	28.2477	23.4909	28.4177	24.5765
pgaptmp_001021	pgaptmp_001021	pgaptmp_001021	protein_coding	protein_coding	pgaptmp_001021	0.4322	435				TRUE	-1.21712	3.47432e-05	0.00178692	Chromosome_I	1082278	1082712	435	-	9.99208	715.416	763.941	810.296	1105.05	986.544	1425.85	611.042	688.833	661.534	1321.79	1315.24	1178.25	792.428	893.499	889.281	1360.15	1315.53	1022.67	1721.14	1422.14	1296.02	67.7685	72.5792	77.7491	136.854	117.266	160.442	66.8829	68.8117
pgaptmp_005222	pgaptmp_005222	pgaptmp_005222	protein_coding	protein_coding	pgaptmp_005222	0.4435	717		GO:0015036		TRUE	-1.21498	3.49446e-05	0.00178692	Chromosome_II	2192381	2193097	717	+	9.42255	401.651	423.336	452.524	1259.44	1013.17	990.427	547.933	471.66	551.044	619.527	647.641	583.566	413.889	600.476	579.68	778.671	721.676	830.837	1370.2	1041.12	1144.82	23.0828	24.401	26.3429	94.6284	73.0646	67.6139	36.3866	28.5856
pgaptmp_000311	pgaptmp_000311	pgaptmp_000311	protein_coding	protein_coding	pgaptmp_000311	0.4779	1473				TRUE	-0.925672	3.56433e-05	0.00180277	Chromosome_I	328371	329843	1473	-	9.08139	683.808	715.535	628.96	644.452	557.107	428.828	308.862	332.103	362.436	486.339	589.59	563.188	600.949	496.142	508.537	608.442	615.156	636.358	582.28	649.263	634.717	19.1289	20.0757	17.8222	23.5696	19.556	14.2499	9.98378	9.79731
pgaptmp_001582	pgaptmp_001582	pgaptmp_001582	protein_coding	protein_coding	pgaptmp_001582	0.462	987				TRUE	1.04576	3.60512e-05	0.00180277	Chromosome_I	1648613	1649599	987	-	7.87663	524.227	575.596	606.905	447.145	399.397	366.153	522.69	561.216	488.409	98.8822	83.4496	111.155	120.779	110.994	115.936	131.464	119.836	101.87	210.671	263.783	254.219	21.8857	24.1014	25.6652	24.4059	20.9234	18.1584	25.215	24.7087
pgaptmp_004236	pgaptmp_004236	cyoC	protein_coding	protein_coding	pgaptmp_004236	0.4633	600	GO:0019646	GO:0009486		TRUE	1.0747	3.62813e-05	0.00180277	Chromosome_II	1088312	1088911	600	+	13.5248	6454.94	6591.2	7531.18	6350.35	7849.34	9338.55	14029.5	15058.1	13711.3	21990.2	24351	20789.8	15867.7	13714.4	13376.1	21116.8	18237.6	20675.7	6327.41	6828.42	6533.27	443.301	453.999	523.905	570.178	676.435	761.835	1113.33	1090.57
pgaptmp_004043	pgaptmp_004043	pgaptmp_004043	protein_coding	protein_coding	pgaptmp_004043	0.4396	546				TRUE	-1.07234	3.73427e-05	0.00183817	Chromosome_II	812020	812565	546	-	9.89041	480.285	420.696	457.425	980.772	1103.97	522.015	455.126	497.781	582.713	1103.85	1150.15	1033.75	1951.61	2398.57	2658.62	1181.49	1356.8	1562.45	1113.71	1027.73	1007.74	36.2464	31.8432	34.9678	96.7697	104.547	46.7976	39.6892	39.6171
pgaptmp_001160	pgaptmp_001160	pgaptmp_001160	protein_coding	protein_coding	pgaptmp_001160	0.4769	1407		GO:0015293	GO:0016020	TRUE	1.0493	3.79701e-05	0.00183886	Chromosome_I	1231173	1232579	1407	+	8.95244	859.579	806.187	730.247	520.174	535.943	454.392	736.518	942.574	789.618	381.403	399.107	496.494	375.593	364.059	437.395	345.514	332.876	369.114	383.903	371.463	390.467	25.1739	23.6801	21.6629	19.9168	19.6955	15.8077	24.9242	29.1111
pgaptmp_002698	pgaptmp_002698	pgaptmp_002698	protein_coding	protein_coding	pgaptmp_002698	0.4071	339				TRUE	-0.864031	3.8055e-05	0.00183886	Chromosome_I	2920478	2920816	339	-	8.75479	293.722	326.523	336.534	317.742	375.501	398.315	239.814	216.426	224.499	561.005	556.935	570.598	773.28	682.611	766.758	659.005	639.123	578.146	410.725	389.94	417.052	35.7021	39.8067	41.4353	50.4939	57.2737	57.5122	33.6827	27.7426
pgaptmp_001949	pgaptmp_001949	pgaptmp_001949	protein_coding	protein_coding	pgaptmp_001949	0.4613	672		GO:0005524,GO:0016887,GO:0042626,GO:0140359		TRUE	-0.900498	4.39007e-05	0.00204904	Chromosome_I	2105564	2106235	672	-	10.4807	1104.73	1177.6	1170.52	1374.75	1392.09	1448.94	786.262	733.611	807.212	2098.72	2322.08	2056.38	1991.38	2196.56	2284.46	1553.97	1533.89	1354.74	1493.14	1325.29	1407.34	67.7401	72.4217	72.7026	110.209	107.113	105.539	55.7097	47.4388
pgaptmp_004315	pgaptmp_004315	pgaptmp_004315	protein_coding	protein_coding	pgaptmp_004315	0.4648	1635				TRUE	1.27186	4.3961e-05	0.00204904	Chromosome_II	1170983	1172617	1635	-	8.24007	1262.77	940.845	762.92	670.077	596.705	334.815	1026.82	973.919	1138.68	98.8822	79.8213	90.777	69.2269	112.104	100.126	92.699	141.14	157.436	329.698	429.444	491.823	31.8248	23.7816	19.4761	22.0786	18.8706	10.0235	29.9026	25.8847
pgaptmp_004889	pgaptmp_004889	pgaptmp_004889	protein_coding	protein_coding	pgaptmp_004889	0.4478	1704				TRUE	-1.53191	4.40811e-05	0.00204904	Chromosome_II	1823024	1824727	1704	-	8.83172	647.575	470.863	458.242	493.269	621.284	299.355	230.904	330.61	256.168	522.663	863.522	553.925	374.12	313.002	243.729	450.011	458.038	384.99	666.661	709.793	959.553	15.6595	11.42	11.2245	15.5947	18.8523	8.59903	6.45201	8.43109
pgaptmp_000201	pgaptmp_000201	pgaptmp_000201	protein_coding	protein_coding	pgaptmp_000201	0.4844	609		GO:0004784,GO:0046872		TRUE	-1.13463	4.41867e-05	0.00204904	Chromosome_I	219253	219861	609	-	9.72658	799.447	934.684	1244.85	1254.31	877.307	987.953	871.645	801.524	643.236	639.707	741.976	529.841	456.603	647.093	624.473	635.409	696.378	711.768	1621.67	1657.88	1677.35	54.0917	63.4292	85.318	110.956	74.4866	79.4057	68.1483	57.1922
pgaptmp_001803	pgaptmp_001803	pgaptmp_001803	protein_coding	protein_coding	pgaptmp_001803	0.4588	1395				TRUE	0.88267	4.44474e-05	0.00204904	Chromosome_I	1926511	1927905	1395	+	6.26583	178.083	211.228	168.267	129.403	118.112	103.908	158.886	150.006	152.012	14.126	48.9813	38.9044	33.877	47.7273	44.7934	62.3611	37.2822	37.0437	73.2041	80.919	78.9242	5.26026	6.25776	5.03461	4.99729	4.37789	3.64593	5.42305	4.67274
pgaptmp_004895	pgaptmp_004895	pgaptmp_004895	protein_coding	protein_coding	pgaptmp_004895	0.4493	612		GO:0031992	GO:0016020	TRUE	-1.51661	4.47388e-05	0.00204904	Chromosome_II	1830672	1831283	612	+	7.00816	194.273	147.86	182.97	318.382	262.168	103.908	100.974	148.513	144.271	98.8822	130.617	87.0718	27.9854	76.5856	55.3331	60.6757	70.5698	55.5655	340.874	334.508	456.93	13.0803	9.98481	12.4787	28.0261	22.1499	8.31058	7.85582	10.5451
pgaptmp_004652	pgaptmp_004652	modF	protein_coding	protein_coding	pgaptmp_004652	0.4375	1449		GO:0005524		TRUE	0.854134	4.5221e-05	0.00205327	Chromosome_II	1562610	1564058	1449	+	8.66122	615.196	598.479	564.43	784.105	673.854	584.69	893.919	967.202	934.593	215.926	212.252	183.407	209.154	205.338	208.158	239.332	207.715	224.908	473.871	480.417	536.685	17.4946	17.0696	16.2586	29.1521	24.0459	19.751	29.3739	29.0059
pgaptmp_000285	pgaptmp_000285	pgaptmp_000285	protein_coding	protein_coding	pgaptmp_000285	0.4167	228				TRUE	-1.7441	4.60351e-05	0.00207218	Chromosome_I	300356	300583	228	-	10.0555	587.443	699.693	646.93	1146.69	969.476	1294.73	665.984	417.927	526.412	1600.28	1429.53	1409.82	723.201	997.833	974.916	2455.68	1584.49	1397.08	2137.45	1623.48	1504.55	106.167	126.828	118.43	270.941	219.86	277.957	139.079	79.6531
pgaptmp_002074	pgaptmp_002074	pgaptmp_002074	protein_coding	protein_coding	pgaptmp_002074	0.45	780				TRUE	-0.894338	4.64245e-05	0.00207218	Chromosome_I	2241185	2241964	780	+	9.29037	587.443	646.006	652.648	705.31	639.717	581.391	418.746	411.21	429.997	720.427	687.552	694.722	690.797	776.955	757.536	633.724	517.956	534.488	824.804	709.156	751.857	31.0334	34.2282	34.9241	48.7135	42.407	36.4844	25.5616	22.909
pgaptmp_003986	pgaptmp_003986	pgaptmp_003986	protein_coding	protein_coding	pgaptmp_003986	0.4735	378				TRUE	0.822661	4.73512e-05	0.00209579	Chromosome_II	754113	754490	378	+	8.11013	275.99	330.044	340.618	411.911	406.224	403.263	492.992	527.633	536.265	195.746	168.713	174.144	212.1	208.668	202.888	173.6	159.781	183.895	279.405	270.155	294.927	30.0857	36.0846	37.6112	58.7051	55.5671	52.2191	62.0984	60.6565
pgaptmp_001061	pgaptmp_001061	pgaptmp_001061	protein_coding	protein_coding	pgaptmp_001061	0.4387	807				TRUE	-0.965347	4.94773e-05	0.00216273	Chromosome_I	1127620	1128426	807	-	7.63067	166.519	190.985	196.856	219.729	204.819	180.602	119.536	97.0187	109.786	240.142	195.925	242.689	284.272	345.19	308.284	214.05	171.764	197.125	214.583	218.545	203.541	8.50255	9.78066	10.1816	14.6682	13.1232	10.9543	7.05272	5.2242
pgaptmp_001494	pgaptmp_001494	pgaptmp_001494	protein_coding	protein_coding	pgaptmp_001494	0.4607	675		GO:0003700		TRUE	0.822158	4.98992e-05	0.00216273	Chromosome_I	1544072	1544746	675	-	8.81743	912.773	1018.3	868.291	647.655	578.955	582.216	929.557	847.794	911.369	181.62	244.906	240.837	220.937	204.228	247.681	332.031	323.556	275.182	462.695	502.717	500.13	55.7208	62.3464	53.6911	51.6897	44.3491	42.2195	65.5699	54.5788
pgaptmp_004381	pgaptmp_004381	pgaptmp_004381	protein_coding	protein_coding	pgaptmp_004381	0.4587	678				TRUE	0.988464	5.00956e-05	0.00216273	Chromosome_II	1245370	1246047	678	-	11.9551	3722.02	4693.66	4520.34	6228	7228.74	6544.57	7963.6	8998.86	8147.42	2395.37	3232.76	3071.6	3540.88	2380.81	2292.37	2170.84	2034.54	1992.42	4113.4	4189.95	3951.2	226.207	286.104	278.28	494.861	551.286	472.481	559.258	576.76
pgaptmp_004802	pgaptmp_004802	pgaptmp_004802	protein_coding	protein_coding	pgaptmp_004802	0.4611	1158	GO:0006865			TRUE	-0.972977	5.08048e-05	0.00216506	Chromosome_II	1728298	1729455	1158	-	11.2457	1186.45	1185.52	1340.42	2014.07	2193.61	2466.58	1503.48	1488.12	1474.38	3985.56	4103.54	4388.79	3312.58	3098.94	3770.55	2919.17	3075.78	3197.66	2947.72	3027.13	2534.71	42.2181	42.3098	48.314	93.6981	97.9478	104.261	61.8188	55.8427
pgaptmp_000248	pgaptmp_000248	queG	protein_coding	protein_coding	pgaptmp_000248	0.4548	1128	GO:0008033,GO:0008616	GO:0051539,GO:0052693		TRUE	-1.12221	5.09716e-05	0.00216506	Chromosome_I	258035	259162	1128	-	11.7805	2556.38	2778.53	2986.33	3215.85	3262.76	2798.93	1686.86	1746.34	1747.43	5569.69	5235.55	6076.5	4109.43	4399.79	4734.93	5293.95	5263.44	4568.28	3892.67	3972.68	3075.55	93.3844	101.8	110.502	153.586	149.562	121.455	71.2038	67.2754
pgaptmp_000943	pgaptmp_000943	pgaptmp_000943	protein_coding	protein_coding	pgaptmp_000943	0.4501	531				TRUE	-1.26166	5.21044e-05	0.00216667	Chromosome_I	992031	992561	531	+	9.60969	587.443	703.213	622.425	825.744	771.484	921.155	514.523	410.464	458.147	845.543	908.875	837.371	846.925	846.881	970.963	975.867	853.495	816.284	1279.12	960.833	997.769	45.5858	54.7311	48.9253	83.7752	75.1236	84.9124	46.1363	33.5906
pgaptmp_001718	pgaptmp_001718	pgaptmp_001718	protein_coding	protein_coding	pgaptmp_001718	0.4508	417				TRUE	1.15529	5.21081e-05	0.00216667	Chromosome_I	1814137	1814553	417	-	10.548	2204.84	1887.85	1739.03	1090.32	1273.97	1276.59	1612.62	1979.18	1822.03	3337.78	3858.64	3977.51	1381.59	1363	1177.8	1162.95	1055.88	967.105	740.423	690.041	917.183	217.871	187.1	174.065	140.858	157.968	149.847	184.131	206.247
pgaptmp_003941	pgaptmp_003941	pgaptmp_003941	protein_coding	protein_coding	pgaptmp_003941	0.4683	1215	GO:0055085	GO:0022857		TRUE	-1.00731	5.26067e-05	0.00216667	Chromosome_II	710343	711557	1215	-	8.84908	218.942	323.883	374.925	312.617	325.662	540.158	303.665	264.936	251.242	807.201	957.856	883.686	478.697	459.514	548.061	701.141	596.515	523.904	584.515	497.62	535.023	7.42525	11.0168	12.8798	13.8612	13.8591	21.7609	11.9001	9.47549
pgaptmp_004872	pgaptmp_004872	fdhF	protein_coding	protein_coding	pgaptmp_004872	0.4968	4239	GO:0015942	GO:0008863	GO:0009326	TRUE	0.952557	5.26549e-05	0.00216667	Chromosome_II	1798758	1802996	4239	-	8.22141	336.122	260.515	243.416	309.414	305.18	298.53	443.989	496.288	429.293	223.998	330.17	300.12	303.42	334.091	293.792	219.107	262.307	355.884	202.848	245.306	228.465	3.26732	2.53986	2.39677	3.93225	3.72252	3.44713	4.98703	5.08754
pgaptmp_004449	pgaptmp_004449	yfcC	protein_coding	protein_coding	pgaptmp_004449	0.4853	1533			GO:0016020	TRUE	1.01464	5.44543e-05	0.00222334	Chromosome_II	1317004	1318536	1533	+	11.0745	2471.58	2824.3	3136.63	3320.91	3709.27	3198.06	2942.36	3194.15	2956.49	1987.73	2024.56	2197.17	1766.02	1510.62	1781.2	1430.93	1384.77	1678.87	1246.15	1579.51	1531.13	66.434	76.1394	85.4008	116.702	125.109	102.112	91.3874	90.5422
pgaptmp_005045	pgaptmp_005045	pgaptmp_005045	protein_coding	protein_coding	pgaptmp_005045	0.4534	1632				TRUE	-1.2919	5.52351e-05	0.00223787	Chromosome_II	2005970	2007601	1632	+	8.64938	320.704	280.757	267.921	969.881	885.5	558.301	327.424	456.734	444.776	264.358	339.241	255.658	203.262	274.154	226.602	291.58	312.904	236.815	981.271	858.888	1107.43	8.09734	7.10972	6.85215	32.0157	28.0551	16.7448	9.55262	12.1613
pgaptmp_004347	pgaptmp_004347	pgaptmp_004347	protein_coding	protein_coding	pgaptmp_004347	0.4342	2172	GO:0055085	GO:0022857	GO:0019867	TRUE	-1.00443	5.67812e-05	0.00226428	Chromosome_II	1208721	1210892	2172	-	11.478	1796.25	1710.07	1846.85	5625.18	6395.81	4106.03	2473.13	2790.41	2810.11	2990.68	3753.42	2604.74	1640.83	1878.01	1420.22	2639.39	2199.65	2087.68	5042.14	4846.86	5839.56	34.0773	32.5383	35.4906	139.521	152.258	92.5326	54.2149	55.8271
pgaptmp_001636	pgaptmp_001636	pgaptmp_001636	protein_coding	protein_coding	pgaptmp_001636	0.435	1092				TRUE	1.38048	5.73023e-05	0.00226428	Chromosome_I	1711538	1712629	1092	+	10.1347	3759.02	3499.34	3473.98	2585.5	2718.63	1629.55	2659.48	3237.44	3409.01	647.779	614.987	266.773	462.495	487.262	317.506	482.035	456.707	301.642	890.185	1261.57	1305.99	141.844	132.436	132.784	127.551	128.727	73.0427	115.96	128.83
pgaptmp_003820	pgaptmp_003820	pgaptmp_003820	protein_coding	protein_coding	pgaptmp_003820	0.464	1584				TRUE	-0.989582	5.75556e-05	0.00226428	Chromosome_II	582006	583589	1584	-	13.2261	4177.63	4310.81	4477.87	6634.14	8633.11	9286.59	6472.74	6144.27	5759.57	14424.7	16156.6	16308.4	17490.9	16045.2	19825	10731.2	11423	9735.88	11684.2	11937.1	11771.3	108.676	112.472	117.993	225.628	281.81	286.968	194.566	168.559
pgaptmp_002503	pgaptmp_002503	pgaptmp_002503	protein_coding	protein_coding	pgaptmp_002503	0.4479	960				TRUE	-1.14571	5.76065e-05	0.00226428	Chromosome_I	2719935	2720894	960	-	12.9792	9558.67	9837.07	9890.19	13964	11343.5	11627.8	10577.8	10226.5	10129.9	5704.9	5279.09	5318.79	3900.28	5033.56	3914.16	3967.52	4187.59	2720.07	23971.8	19631.5	22737.7	410.284	423.483	430.006	783.614	610.972	592.871	524.634	462.907
pgaptmp_004559	pgaptmp_004559	pgaptmp_004559	protein_coding	protein_coding	pgaptmp_004559	0.4745	1041				TRUE	-0.943596	5.90277e-05	0.00230295	Chromosome_II	1443304	1444344	1041	-	10.7185	875.768	906.52	928.737	1598.32	1820.16	2054.25	1187.93	1000.79	1069.71	2237.97	2556.1	2458.39	1771.92	1654.92	1878.69	2556.81	2529.86	2413.13	1880.96	2003.22	2214.03	34.6654	35.9889	37.2377	82.7136	90.407	96.5907	54.3342	41.7761
pgaptmp_004781	pgaptmp_004781	pgaptmp_004781	protein_coding	protein_coding	pgaptmp_004781	0.4676	633				TRUE	-1.04202	6.07317e-05	0.00235201	Chromosome_II	1706802	1707434	633	-	9.84136	335.351	403.094	397.797	780.261	734.617	1244.42	561.298	435.092	446.887	1612.38	1464	1398.71	1469.97	1399.63	1576.99	1623.07	1636.42	1479.1	993.564	914.321	994.445	21.83	26.3174	26.23	66.405	60.0069	96.2272	42.2204	29.8686
pgaptmp_004154	pgaptmp_004154	tssC	protein_coding	protein_coding	pgaptmp_004154	0.4573	1476	GO:0033103	GO:0003674	GO:0033104	TRUE	-1.69169	6.35073e-05	0.00244155	Chromosome_II	991158	992633	1476	+	7.48684	132.599	75.6901	73.5148	172.964	189.799	84.1162	260.603	367.179	350.472	159.422	99.7767	113.008	111.941	145.402	77.7298	129.779	111.846	78.0564	772.276	1005.43	1340.05	3.70178	2.11931	2.07888	6.31298	6.64892	2.7895	8.40669	10.8101
pgaptmp_001490	pgaptmp_001490	pgaptmp_001490	protein_coding	protein_coding	pgaptmp_001490	0.4322	516	GO:0006508	GO:0008237,GO:0008270,GO:0016787,GO:0046872		TRUE	-0.97497	6.43541e-05	0.00245618	Chromosome_I	1540171	1540686	516	+	9.06267	447.906	439.178	383.094	471.488	586.465	399.14	265.8	279.115	294.171	744.643	997.767	944.821	567.072	667.072	604.711	787.098	782.925	674.724	530.311	472.134	617.271	35.7681	35.1749	30.9882	49.2249	58.7673	37.8624	24.5266	23.5056
pgaptmp_000640	pgaptmp_000640	pgaptmp_000640	protein_coding	protein_coding	pgaptmp_000640	0.4349	1014				TRUE	-1.35291	6.62257e-05	0.00249256	Chromosome_I	652424	653437	1014	+	12.8499	7441.72	8156.04	8860.98	9769.92	8963.55	12774.1	7018.45	6635.33	6542.85	6427.34	5984.79	5894.94	4006.33	4738.32	4398.98	6013.63	4709.54	3880.33	20250.2	15036.3	14660	302.408	332.417	364.741	519.06	457.074	616.631	329.561	284.356
pgaptmp_000391	pgaptmp_000391	pgaptmp_000391	protein_coding	protein_coding	pgaptmp_000391	0.4253	4308				TRUE	-1.15605	6.64702e-05	0.00249256	Chromosome_I	420499	424806	4308	+	12.9218	10802.2	8479.93	8662.49	7065.27	7929.22	6758.16	3574.93	4138.97	4368.94	8822.71	8885.57	8344.07	11621.3	11037.2	10319.6	7060.29	8514.98	7384.92	7583.61	8559.57	10009.3	103.322	81.3501	83.9282	88.3522	95.1697	76.7866	39.5116	41.7497
pgaptmp_004611	pgaptmp_004611	pgaptmp_004611	protein_coding	protein_coding	pgaptmp_004611	0.4314	1305				TRUE	1.00176	6.71883e-05	0.00249256	Chromosome_II	1511227	1512531	1305	-	10.4108	1476.32	1312.25	1276.71	1346.56	1418.03	1213.91	1623.01	2120.23	1869.89	1208.78	1211.83	1065.24	1720.36	1703.75	1401.77	1643.3	1713.65	1309.76	898.008	869.72	939.614	46.6152	41.5575	40.834	55.5878	56.1848	45.5312	59.2167	70.6009
pgaptmp_003319	pgaptmp_003319	pgaptmp_003319	protein_coding	protein_coding	pgaptmp_003319	0.4722	252				TRUE	0.944019	6.72002e-05	0.00249256	Chromosome_II	54959	55210	252	-	6.42608	41.6298	59.8479	60.4455	95.4507	67.5902	112.98	125.475	120.9	113.305	54.4861	76.1931	79.6614	145.818	74.3657	85.6345	102.812	218.367	133.622	50.8517	61.8043	58.9855	6.8071	9.815	10.0116	20.4053	13.8684	21.9448	23.7078	20.848
pgaptmp_003380	pgaptmp_003380	pgaptmp_003380	protein_coding	protein_coding	pgaptmp_003380	0.4286	210				TRUE	-1.08472	6.85277e-05	0.00252213	Chromosome_II	116380	116589	210	-	10.7913	889.645	757.781	820.915	1978.2	1706.82	1383.79	1092.15	1041.83	1154.87	2934.18	2819.14	2903.01	2075.34	2579.49	2472.86	2681.53	2228.94	2242.47	2064.24	2013.42	2714.99	174.564	149.13	163.162	507.475	420.255	322.541	247.627	215.584
pgaptmp_001262	pgaptmp_001262	pgaptmp_001262	protein_coding	protein_coding	pgaptmp_001262	0.4407	540				TRUE	0.792565	6.96625e-05	0.00252213	Chromosome_I	1348447	1348986	540	+	7.61076	522.686	559.754	586.485	337.601	327.027	266.368	524.917	537.334	526.412	32.2881	87.0778	74.1036	86.9019	91.0148	98.809	79.2155	61.2493	74.0874	290.022	311.57	278.312	39.8846	42.8396	45.3319	33.6801	31.3137	24.1447	46.2839	43.2403
pgaptmp_004278	pgaptmp_004278	pgaptmp_004278	protein_coding	protein_coding	pgaptmp_004278	0.4557	564		GO:0015288	GO:0009279	TRUE	1.40986	6.98231e-05	0.00252213	Chromosome_II	1130130	1130693	564	-	7.90697	375.439	511.348	546.46	413.833	344.778	514.593	855.311	738.835	616.493	123.098	148.758	140.797	82.4832	68.8161	75.0949	158.431	81.2219	113.777	310.14	266.332	215.172	27.4296	37.4696	40.4408	39.5285	31.6086	44.6599	72.2067	56.9254
pgaptmp_000329	pgaptmp_000329	pgaptmp_000329	protein_coding	protein_coding	pgaptmp_000329	0.451	765				TRUE	-1.01584	6.99129e-05	0.00252213	Chromosome_I	346941	347705	765	-	10.3476	949.777	1042.94	970.395	1169.75	1217.99	1030.01	672.666	717.939	729.095	1874.73	1580.1	1691.42	1689.43	1909.09	2074.99	1896.11	1784.22	1711.95	1582.55	1353.32	1232.88	51.1586	56.3429	52.9454	82.3752	82.3239	65.9042	41.8669	40.7815
pgaptmp_001802	pgaptmp_001802	tssC	protein_coding	protein_coding	pgaptmp_001802	0.4895	1479	GO:0033103	GO:0003674	GO:0033104	TRUE	1.21194	7.23195e-05	0.00257595	Chromosome_I	1924964	1926442	1479	+	6.60819	236.673	252.594	256.485	115.31	140.642	151.739	212.343	180.604	193.534	42.3781	39.9107	81.514	53.0249	52.167	44.7934	62.3611	49.2657	68.7954	67.616	96.2108	69.7856	6.59385	7.05823	7.23827	4.20012	4.9169	5.02183	6.836	5.30636
pgaptmp_003186	pgaptmp_003186	pgaptmp_003186	protein_coding	protein_coding	pgaptmp_003186	0.4679	1716				TRUE	0.79094	7.23828e-05	0.00257595	Chromosome_I	3456353	3458068	1716	-	10.4595	1894.93	1990.82	2057.6	1026.25	1220.72	1401.94	1263.66	1304.53	1203.43	1467.09	1692.58	1704.38	1969.29	1666.01	1617.83	1761.28	1882.75	1873.35	663.308	728.271	713.641	45.5023	47.9465	50.0477	32.2183	36.7826	39.9893	35.0628	33.035
pgaptmp_001420	pgaptmp_001420	pgaptmp_001420	protein_coding	protein_coding	pgaptmp_001420	0.4325	696				TRUE	-0.791831	7.28839e-05	0.00257637	Chromosome_I	1469937	1470632	696	-	10.384	1276.65	1227.76	1132.13	1059.57	938.07	904.661	737.26	663.459	722.761	1999.84	1795.98	2243.49	2078.28	2632.77	2691.56	1616.33	1623.11	1453.96	1134.38	1222.7	1222.08	75.5823	72.9033	67.8933	82.0131	69.6899	63.6223	50.4364	41.4231
pgaptmp_002670	pgaptmp_002670	pgaptmp_002670	protein_coding	protein_coding	pgaptmp_002670	0.4714	594				TRUE	-1.64164	7.45201e-05	0.00261665	Chromosome_I	2890401	2890994	594	-	13.3946	5395.69	6269.07	7237.12	8570.7	8907.57	16090.9	5330.84	4215.84	3941.76	23120.3	25820.4	26921.9	13503.7	12180.4	15571	11385.1	14450.8	10994	16912.9	12968.1	10873.3	374.299	436.173	508.534	777.31	775.384	1325.95	427.309	308.414
pgaptmp_000241	pgaptmp_000241	pgaptmp_000241	protein_coding	protein_coding		0.5	1000				TRUE	-1.24789	7.6336e-05	0.00265434	pgaptmp_000241	1	1000	1000	+	11.6849	990.636	1135.35	1190.94	1240.86	1918.47	2576.26	1021.62	936.604	855.772	11793.2	16296.3	14100.1	9691.77	5810.52	7072.09	12303.7	9917.06	8379.81	2625.85	1924.85	1944.86	40.8199	46.9215	49.7085	66.8477	99.1971	126.102	48.6433	40.6999
pgaptmp_003172	pgaptmp_003172	pgaptmp_003172	protein_coding	protein_coding	pgaptmp_003172	0.4401	609				TRUE	-0.801552	7.66014e-05	0.00265434	Chromosome_I	3439744	3440352	609	-	9.30821	308.369	336.205	267.921	221.651	294.939	330.692	251.693	250.756	254.761	1202.73	1244.49	1235.68	1415.47	1046.67	1140.92	2821.42	2597.77	3769.2	462.136	414.152	417.052	20.8647	22.8154	18.3624	19.6072	25.0414	26.579	19.6783	17.8925
pgaptmp_000236	pgaptmp_000236	pgaptmp_000236	protein_coding	protein_coding		0.5	1000				TRUE	-1.4664	7.73938e-05	0.00266427	pgaptmp_000236	1	1000	1000	+	12.3432	1615.85	1569.25	2041.26	2874.41	2902.97	5684.44	1466.35	1461.25	1380.07	18846.1	21043.8	22097.7	12214.9	8618.66	9647.71	18098.2	14332.3	11823.6	4991.29	3334.24	3220.11	66.5825	64.8535	85.1999	154.851	150.102	278.241	69.8186	63.4983
pgaptmp_005036	pgaptmp_005036	napG	protein_coding	protein_coding	pgaptmp_005036	0.4981	771				TRUE	1.10967	8.14667e-05	0.00278627	Chromosome_II	1994860	1995630	771	-	7.58273	262.885	317.722	347.97	401.662	440.36	487.379	510.068	553.753	444.776	66.5941	72.5649	68.5459	83.9561	81.0254	96.1741	112.924	95.8684	93.9322	183.849	249.766	234.28	14.0498	17.0308	18.8377	28.0653	29.5323	30.9418	31.4997	31.2104
pgaptmp_001896	pgaptmp_001896	pgaptmp_001896	protein_coding	protein_coding	pgaptmp_001896	0.4621	1545	GO:0008150	GO:0003824	GO:0005575	TRUE	1.02347	8.27768e-05	0.00279643	Chromosome_I	2036880	2038424	1545	-	10.2934	2665.85	2517.13	2166.24	1531.7	1270.56	954.142	1441.85	1788.13	1750.25	837.471	979.626	794.762	879.329	951.215	1046.06	1339.92	1150.42	2230.56	716.395	752.483	898.075	71.0993	67.3317	58.5219	53.4082	42.5217	30.2285	44.435	50.293
pgaptmp_004681	pgaptmp_004681	rbsD	protein_coding	protein_coding	pgaptmp_004681	0.4476	420		GO:0016872		TRUE	1.50904	8.28258e-05	0.00279643	Chromosome_II	1594576	1594995	420	-	6.42553	575.879	413.655	307.128	177.449	129.719	150.09	325.196	283.593	303.32	14.126	56.2378	27.7889	19.1479	14.4292	15.8094	42.1359	22.6356	44.9816	67.0572	111.503	120.463	56.499	40.7034	30.5219	22.7608	15.9697	17.4918	36.8663	29.3416
pgaptmp_002188	pgaptmp_002188	pgaptmp_002188	protein_coding	protein_coding	pgaptmp_002188	0.4076	1494				TRUE	0.873912	8.37139e-05	0.00280841	Chromosome_I	2368459	2369952	1494	-	8.54342	732.377	926.763	876.459	753.356	678.633	656.436	995.635	861.974	902.923	153.368	186.855	116.713	164.966	136.522	150.19	190.454	171.764	146.852	467.724	449.196	535.023	20.1996	25.6366	24.4862	27.1652	23.487	21.5067	31.7309	25.0715
pgaptmp_002469	pgaptmp_002469	pgaptmp_002469	protein_coding	protein_coding	pgaptmp_002469	0.4567	462			GO:0016020	TRUE	0.818112	8.53155e-05	0.00284403	Chromosome_I	2685040	2685501	462	+	9.12987	1141.74	1153.83	971.212	603.453	647.91	475.009	778.838	921.678	846.623	474.231	511.582	400.16	434.51	503.911	372.839	416.303	378.148	277.828	469.401	460.665	461.084	101.832	103.215	87.7431	70.3665	72.5131	50.326	80.2671	86.6911
pgaptmp_003173	pgaptmp_003173	pgaptmp_003173	protein_coding	protein_coding	pgaptmp_003173	0.497	330		GO:0022857	GO:0016020	TRUE	-0.796976	8.62895e-05	0.00285841	Chromosome_I	3440405	3440734	330	-	8.13107	202.753	211.228	164.183	69.1857	88.0721	91.5382	73.5033	76.8687	73.191	492.393	538.794	639.144	854.29	628.224	687.711	2042.75	2323.48	2077.09	130.762	131.892	128.771	25.3169	26.4533	20.7661	11.2945	13.7997	13.5775	10.6054	10.1222
pgaptmp_001854	pgaptmp_001854	pgaptmp_001854	protein_coding	protein_coding	pgaptmp_001854	0.4326	141				TRUE	-1.05759	8.73758e-05	0.0028763	Chromosome_I	1983543	1983683	141	-	10.4187	973.675	1008.61	864.207	1220.36	869.797	1392.87	991.181	877.646	926.148	2246.04	1688.95	2058.23	1181.28	1511.73	1529.56	1786.56	1663.05	1709.3	1840.16	1603.09	2223.17	284.547	295.629	255.823	466.265	318.965	483.529	334.708	270.482
pgaptmp_001326	pgaptmp_001326	pgaptmp_001326	protein_coding	protein_coding	pgaptmp_001326	0.3969	519		GO:0008080,GO:0016746		TRUE	0.878213	8.87981e-05	0.00290496	Chromosome_I	1397373	1397891	519	+	8.54447	504.954	535.111	610.173	607.938	653.372	586.339	668.212	703.759	729.095	248.214	253.977	224.164	212.1	275.264	222.65	217.421	238.34	160.082	402.902	359.994	333.974	40.0906	42.6107	49.0712	63.1038	65.0934	55.2986	61.3027	58.9242
pgaptmp_004832	pgaptmp_004832	pgaptmp_004832	protein_coding	protein_coding	pgaptmp_004832	0.4304	237				TRUE	-1.27154	8.99764e-05	0.00292534	Chromosome_II	1758632	1758868	237	+	10.0688	369.272	506.067	524.405	748.871	606.264	1054.75	625.892	450.018	514.448	3541.6	1946.55	3130.88	1265.23	1409.62	1710.06	1978.7	1623.11	1600.82	1468.55	1130.32	1145.65	64.2031	88.2473	92.3549	170.225	132.269	217.838	125.743	82.5123
pgaptmp_001216	pgaptmp_001216	nrfA	protein_coding	protein_coding	pgaptmp_001216	0.4958	1428	GO:0008152	GO:0005509,GO:0020037,GO:0042279	GO:0042597	TRUE	0.931365	9.16718e-05	0.00296218	Chromosome_I	1298386	1299813	1428	-	7.82657	578.963	673.289	579.133	454.832	485.421	340.588	533.084	464.944	527.116	88.7922	68.9366	137.092	60.3895	109.884	126.476	74.1592	125.162	111.131	219.054	279.712	267.512	16.7063	19.4857	16.9274	17.1588	17.5766	11.6744	17.7746	14.1485
pgaptmp_004855	pgaptmp_004855	pgaptmp_004855	protein_coding	protein_coding	pgaptmp_004855	0.4815	783		GO:0005524		TRUE	-1.15696	9.28573e-05	0.00298219	Chromosome_II	1778366	1779148	783	+	8.78995	293.722	246.433	305.495	759.762	791.966	548.405	315.544	429.121	378.623	429.835	569.634	452.032	306.366	327.431	281.935	391.021	375.485	379.698	697.954	813.013	946.26	15.4573	13.007	16.2848	52.2733	52.2984	34.2825	19.1881	23.8153
pgaptmp_003101	pgaptmp_003101	pgaptmp_003101	protein_coding	protein_coding	pgaptmp_003101	0.5011	465				TRUE	0.828793	9.44953e-05	0.00301267	Chromosome_I	3359289	3359753	465	-	10.6248	1343.72	1521.72	1476.01	1268.4	1699.31	2074.87	1843.52	1979.18	1789.66	1674.94	2334.77	2091.58	2028.2	1348.57	1488.72	1786.56	1699	1545.25	951.654	1100.37	1002.75	119.073	135.246	132.489	146.95	188.958	218.409	188.768	184.957
pgaptmp_004645	pgaptmp_004645	pgaptmp_004645	protein_coding	protein_coding	pgaptmp_004645	0.3618	1125				TRUE	0.844279	9.49503e-05	0.00301267	Chromosome_II	1555266	1556390	1125	-	9.90831	2983.47	3112.09	3287.74	4232.5	4003.53	2690.89	3762.77	4009.86	4418.91	177.584	183.226	87.0718	181.168	203.118	113.301	399.448	295.594	301.642	2160.92	2236.42	2173.32	109.277	114.325	121.979	202.679	184.007	117.078	159.253	154.887
pgaptmp_004349	pgaptmp_004349	pgaptmp_004349	protein_coding	protein_coding	pgaptmp_004349	0.4246	2082	GO:0055085	GO:0022857	GO:0019867	TRUE	-0.864923	9.58994e-05	0.00302456	Chromosome_II	1212069	1214150	2082	-	10.5129	1024.56	1211.04	1320	4805.85	3970.07	3678.02	2001.66	1878.43	1848.07	938.372	1195.51	779.941	530.249	632.664	501.95	921.933	849.501	801.731	3631.71	3148.19	3343.9	20.2774	24.0392	26.4627	124.352	98.5965	86.4702	45.7766	39.206
pgaptmp_003174	pgaptmp_003174	pgaptmp_003174	protein_coding	protein_coding	pgaptmp_003174	0.4709	378		GO:0022857	GO:0016020	TRUE	-1.03099	9.679e-05	0.00303439	Chromosome_I	3440737	3441114	378	-	8.80447	316.849	357.327	310.396	89.0446	126.305	152.564	109.884	111.945	97.1188	900.03	1219.09	1265.32	1546.56	846.881	1038.15	2740.52	3648.33	3061.4	217.377	247.854	186.926	34.5397	39.0676	34.274	12.6905	17.2772	19.7557	13.8412	12.8691
pgaptmp_002468	pgaptmp_002468	pgaptmp_002468	protein_coding	protein_coding	pgaptmp_002468	0.4623	915			GO:0016020	TRUE	1.09652	9.73632e-05	0.00303439	Chromosome_I	2684116	2685030	915	+	9.76516	2413.76	2297.11	2423.54	1301.72	1211.16	742.202	1534.66	2065.01	1794.59	764.823	633.128	535.399	615.678	824.683	613.933	224.163	262.307	232.846	733.159	774.783	929.644	108.7	103.753	110.553	76.6407	68.4424	39.7039	79.859	98.0703
pgaptmp_004848	pgaptmp_004848	hutX	protein_coding	protein_coding	pgaptmp_004848	0.4722	504				TRUE	-1.08093	9.90976e-05	0.00305491	Chromosome_II	1772505	1773008	504	-	9.6065	504.954	454.14	628.96	1641.24	1532.04	1237	648.165	831.376	772.024	799.129	954.228	766.973	409.47	499.471	357.03	539.339	619.15	537.134	1398.7	1431.69	1815.26	41.2838	37.2393	52.0875	175.431	157.175	120.136	61.2333	71.681
pgaptmp_000487	pgaptmp_000487	pgaptmp_000487	protein_coding	protein_coding	pgaptmp_000487	0.4416	231				TRUE	1.11584	9.97012e-05	0.00305491	Chromosome_I	509641	509871	231	+	5.03041	444.822	308.041	272.005	30.7492	19.1164	14.844	41.5776	32.0908	38.7068	18.162	27.2118	40.757	27.9854	18.8689	21.0793	8.42718	17.3096	21.1678	15.0879	11.4688	12.4617	79.3474	55.111	49.1479	7.17111	4.27896	3.14538	8.56999	6.03679
pgaptmp_003154	pgaptmp_003154	pgaptmp_003154	protein_coding	protein_coding	pgaptmp_003154	0.4308	441				TRUE	-0.818455	0.000100361	0.00305491	Chromosome_I	3419007	3419447	441	+	8.01585	262.114	174.263	240.965	172.324	213.012	123.7	104.686	106.721	117.528	326.917	366.453	402.012	462.495	499.471	490.093	613.499	517.956	529.196	175.466	199.43	203.541	24.4912	16.3308	22.8064	21.0509	24.9752	13.7298	11.3028	10.5159
pgaptmp_002379	pgaptmp_002379	pgaptmp_002379	protein_coding	protein_coding	pgaptmp_002379	0.3883	273				TRUE	-1.03881	0.000100423	0.00305491	Chromosome_I	2592078	2592350	273	+	10.8302	1532.59	1654.62	1708.81	1946.81	1644.01	1678.2	1158.23	1073.18	1252.69	2260.16	1866.73	1924.84	1702.69	2056.71	1944.56	2480.96	2444.64	1943.47	2687.32	2150.41	2110.18	231.325	250.482	261.259	384.171	311.377	300.894	202.007	170.823
pgaptmp_002787	pgaptmp_002787	brnQ	protein_coding	protein_coding	pgaptmp_002787	0.468	1314	GO:0015803	GO:0015658	GO:0016020	TRUE	-0.985181	0.000100922	0.00305491	Chromosome_I	3019030	3020343	1314	-	12.6476	5447.34	6166.98	6453.78	4543.84	4782.52	6742.49	3842.22	3412.07	3335.12	9129.45	9850.68	11115.5	7687.14	7402.17	8310.5	7473.22	7644.18	7735.52	7218.15	6996.62	6107.91	170.823	193.963	205.003	186.291	188.194	251.164	139.226	112.839
pgaptmp_002360	pgaptmp_002360	pgaptmp_002360	protein_coding	protein_coding	pgaptmp_002360	0.4691	663	GO:0006813			TRUE	-0.743244	0.000101798	0.00306229	Chromosome_I	2568524	2569186	663	-	9.29871	471.805	428.617	530.94	450.988	514.778	529.437	386.82	393.299	389.179	799.129	941.529	976.315	751.186	909.038	840.536	807.324	987.977	865.235	601.28	619.954	691.21	29.3229	26.7176	33.4251	36.6451	40.1467	39.0871	27.7798	25.7779
pgaptmp_001484	pgaptmp_001484	pgaptmp_001484	protein_coding	protein_coding	pgaptmp_001484	0.4598	870	GO:0006355	GO:0003677,GO:0003700		TRUE	1.15629	0.000102328	0.00306229	Chromosome_I	1534252	1535121	870	+	8.44052	1292.84	1394.11	1600.99	778.98	643.131	832.915	1868.77	1482.89	1531.38	54.4861	54.4236	42.6096	69.2269	54.3869	57.968	123.037	163.775	205.063	610.78	837.862	664.625	61.2326	66.2244	76.8086	48.236	38.2229	46.8613	102.275	74.0676
pgaptmp_001888	pgaptmp_001888	pgaptmp_001888	protein_coding	protein_coding	pgaptmp_001888	0.4685	1206	GO:0003333			TRUE	-0.852381	0.00010336	0.0030757	Chromosome_I	2028096	2029301	1206	-	11.1388	1689.86	2020.75	2141.73	1954.5	2253.01	2546.58	1464.13	1388.86	1366.7	2399.41	2913.48	2782.59	3050.4	2263.16	2645.45	2673.1	2789.5	2865.59	2374.94	2718.75	2306.25	57.7381	69.2479	74.1239	87.3076	96.596	103.358	57.8048	50.0436
pgaptmp_004030	pgaptmp_004030	pgaptmp_004030	protein_coding	protein_coding	pgaptmp_004030	0.4554	1770			GO:0098561	TRUE	-0.966132	0.000104945	0.00309008	Chromosome_II	800173	801942	1770	-	10.4185	1093.94	1040.3	1110.07	1292.75	1233.01	913.733	1187.93	1282.14	1257.62	1676.96	1819.56	2274.98	790.955	1262	1331.95	1076.99	1043.9	1518.79	2373.27	2014.69	2694.22	25.467	24.2899	26.177	39.3464	36.0194	25.2685	31.9559	31.4774
pgaptmp_001482	pgaptmp_001482	pgaptmp_001482	protein_coding	protein_coding	pgaptmp_001482	0.445	582				TRUE	-0.728762	0.000105017	0.00309008	Chromosome_I	1532264	1532845	582	-	9.54131	807.927	763.941	847.054	848.806	793.332	769.416	581.344	550.022	598.196	817.291	774.63	841.076	605.368	780.285	757.536	613.499	641.786	644.296	918.684	960.833	911.367	57.2015	54.2474	60.7476	78.5688	70.4816	64.7099	47.5601	41.0671
pgaptmp_001747	pgaptmp_001747	pgaptmp_001747	protein_coding	protein_coding	pgaptmp_001747	0.4388	417		GO:0016787		TRUE	1.02883	0.000106408	0.00310241	Chromosome_I	1843516	1843932	417	-	5.87323	222.026	153.14	195.223	125.559	90.1203	79.9929	152.946	126.124	152.012	20.18	14.513	12.9681	35.3499	27.7484	26.3491	18.5398	33.2876	27.7828	55.3222	64.99	74.7703	21.9394	15.1773	19.5405	16.221	11.1746	9.38962	17.4637	13.1432
pgaptmp_004117	pgaptmp_004117	pgaptmp_004117	protein_coding	protein_coding	pgaptmp_004117	0.4953	426				TRUE	-0.906501	0.000106662	0.00310241	Chromosome_II	930985	931410	426	+	7.74544	115.638	93.2924	98.8365	251.759	200.722	257.297	164.083	147.021	142.863	288.575	275.746	292.709	306.366	257.505	266.126	205.623	286.274	275.182	298.963	292.455	250.065	11.1854	9.05062	9.68387	31.8376	24.363	29.5636	18.3395	14.9971
pgaptmp_001254	pgaptmp_001254	queD	protein_coding	protein_coding	pgaptmp_001254	0.416	363	GO:0008616	GO:0003824		TRUE	-1.65726	0.000107296	0.00310241	Chromosome_I	1340483	1340845	363	+	11.6602	1608.92	1930.1	2252	2510.54	2399.11	4160.45	1602.97	1200.79	1252.69	5081.33	4689.5	4712.99	3268.4	3638.37	4217.17	8376.61	6994.4	5575.08	5470.75	3675.76	3264.97	182.635	219.742	258.942	372.585	341.734	561.005	210.257	143.747
pgaptmp_004429	pgaptmp_004429	pgaptmp_004429	protein_coding	protein_coding		0.5	1000				TRUE	-1.63785	0.00010821	0.00310241	pgaptmp_004429	1	1000	1000	+	10.5666	820.262	854.593	1182.77	2233.8	1953.29	2008.07	1000.83	920.932	900.812	2177.43	1975.58	2349.09	755.605	1031.13	1198.88	2199.49	1624.44	1456.61	3713.29	2825.16	1991.38	33.7995	35.3184	49.3676	120.34	100.997	98.2904	47.6534	40.0189
pgaptmp_000195	pgaptmp_000195	pgaptmp_000195	protein_coding	protein_coding	pgaptmp_000195	0.4953	636	GO:0000160			TRUE	0.845531	0.000108911	0.00310241	Chromosome_I	211864	212499	636	-	7.75862	349.228	391.652	275.272	269.696	298.353	258.121	394.245	380.612	412.403	100.9	121.546	118.566	163.493	192.019	167.317	143.262	147.797	138.914	182.172	228.102	221.819	22.6261	25.4498	18.0653	22.8445	24.2559	19.8655	29.5149	26.0053
pgaptmp_002140	pgaptmp_002140	pgaptmp_002140	protein_coding	protein_coding	pgaptmp_002140	0.4694	1440	GO:0009401	GO:0008982	GO:0016020	TRUE	1.20662	0.000109305	0.00310241	Chromosome_I	2325593	2327032	1440	-	8.13232	662.994	629.284	622.425	340.804	336.586	352.133	583.571	524.647	565.119	104.936	114.29	133.387	179.695	120.983	189.713	212.365	195.731	404.835	171.555	266.332	255.05	18.9716	18.0603	18.0412	12.7499	12.0858	11.9695	19.2959	15.8322
pgaptmp_000178	pgaptmp_000178	fis	protein_coding	protein_coding	pgaptmp_000178	0.4074	297				TRUE	-1.28017	0.000110117	0.00310241	Chromosome_I	191485	191781	297	-	12.5927	4244.7	3494.06	3245.27	3653.39	4387.9	2126.82	1912.57	2256.06	2453.31	16860.4	15949.8	16925.3	9909.76	13866.4	14067.8	13716.1	12963.5	10914.7	5101.38	4193.13	6334.71	588.91	486.201	456.074	662.68	763.914	350.515	306.615	330.089
pgaptmp_000296	pgaptmp_000296	pgaptmp_000296	protein_coding	protein_coding	pgaptmp_000296	0.3968	189				TRUE	-1.13572	0.000110761	0.00310241	Chromosome_I	309411	309599	189	+	9.17695	322.246	300.12	349.604	422.802	450.601	520.366	239.814	214.934	267.429	1061.47	1220.9	1156.02	888.167	761.416	853.71	1452.85	1231.64	1012.09	621.956	453.019	484.346	70.256	65.6258	77.2067	120.514	123.275	134.766	60.415	49.4174
pgaptmp_004646	pgaptmp_004646	pgaptmp_004646	protein_coding	protein_coding	pgaptmp_004646	0.3958	960				TRUE	0.911343	0.000111177	0.00310241	Chromosome_II	1556390	1557349	960	-	10.4944	4957.03	5706.68	5807.67	6422.1	6206.69	4931.52	7291.67	6753.25	7476.04	254.268	243.092	125.976	219.464	209.778	227.92	495.518	312.904	280.474	3752.97	3951.01	3368.82	212.769	245.671	252.506	360.388	334.297	251.445	361.65	305.688
pgaptmp_002819	pgaptmp_002819	pgaptmp_002819	protein_coding	protein_coding	pgaptmp_002819	0.4815	621				TRUE	-0.691933	0.000111326	0.00310241	Chromosome_I	3061145	3061765	621	+	8.90054	326.871	393.412	333.267	310.695	338.634	388.419	239.814	237.323	242.093	710.337	687.552	635.439	966.231	910.148	915.63	797.211	834.854	800.408	375.52	372.1	391.298	21.6892	26.1817	22.3997	26.953	28.1957	30.6155	18.3872	16.6068
pgaptmp_000239	pgaptmp_000239	pgaptmp_000239	protein_coding	protein_coding		0.5	1000				TRUE	-1.39317	0.000112994	0.0031323	pgaptmp_000239	1	1000	1000	+	11.9105	1164.09	1209.28	1281.61	1438.17	1895.26	3195.59	991.181	1032.13	838.178	14773.8	19055.5	18866.8	11743.5	7485.41	8799.27	16840.9	13556.1	11278.5	3104.75	2153.59	2044.55	47.9674	49.9768	53.4929	77.4771	97.9968	156.417	47.1939	44.851
pgaptmp_004360	pgaptmp_004360	pgaptmp_004360	protein_coding	protein_coding	pgaptmp_004360	0.3937	315				TRUE	-1.02588	0.000118248	0.00325767	Chromosome_II	1224227	1224541	315	+	5.25107	24.6695	17.6023	26.1386	23.7025	32.0883	53.6035	37.8653	38.0612	30.2617	58.5221	19.9553	38.9044	17.675	25.5285	21.0793	67.4174	57.2548	55.5655	82.1451	79.0075	68.9549	3.22707	2.30941	3.46348	4.05367	5.2672	8.32943	5.72353	5.2506
pgaptmp_004847	pgaptmp_004847	hutZ	protein_coding	protein_coding	pgaptmp_004847	0.4294	531	GO:0042167	GO:0020037		TRUE	-0.800001	0.000119075	0.00325767	Chromosome_II	1771840	1772370	531	-	10.9522	969.05	994.532	1253.02	3005.74	2993.77	3678.02	1516.84	1700.81	1582.05	2518.47	2971.53	2676.99	1123.83	1164.32	1032.88	3423.12	2603.09	2189.55	2830.37	2617.44	2664.32	75.1986	77.4044	98.4927	304.944	291.519	339.041	136.012	139.187
pgaptmp_001934	pgaptmp_001934	pgaptmp_001934	protein_coding	protein_coding	pgaptmp_001934	0.398	588				TRUE	1.3516	0.000119372	0.00325767	Chromosome_I	2085229	2085816	588	-	10.0902	4183.03	5429.44	5141.13	3317.07	2674.93	4102.73	6025.04	4267.33	4682.11	163.458	174.156	146.355	167.912	154.281	126.476	830.92	591.189	259.306	2168.74	1944.6	1551.9	293.138	381.61	364.941	303.908	235.223	341.529	487.883	315.367
pgaptmp_005315	pgaptmp_005315	yidD	protein_coding	protein_coding	pgaptmp_005315	0.4558	351				TRUE	1.00475	0.000120207	0.00326356	Chromosome_II	2300584	2300934	351	-	6.95798	133.37	147.86	147.846	183.855	186.385	232.557	273.967	273.891	255.465	60.5401	70.7507	50.02	44.1874	71.0359	65.8727	146.633	102.526	138.914	142.497	129.343	104.678	15.657	17.4094	17.581	28.2184	27.4567	32.4305	37.1641	33.9085
pgaptmp_001784	pgaptmp_001784	queE	protein_coding	protein_coding	pgaptmp_001784	0.4424	651	GO:0006400	GO:0051539,GO:1904047		TRUE	-0.811009	0.000120935	0.00326649	Chromosome_I	1903250	1903900	651	-	10.1774	1093.94	1060.54	1083.93	1077.5	1035.02	1078.67	731.32	753.761	783.988	1620.46	1641.78	1787.75	1166.55	1310.83	1350.39	1168.01	1290.23	1034.58	1394.79	1171.73	1305.16	69.2421	67.3268	69.4965	89.1666	82.2074	81.1034	53.4884	50.3141
pgaptmp_003170	pgaptmp_003170	pgaptmp_003170	protein_coding	protein_coding	pgaptmp_003170	0.4847	522	GO:0046177	GO:0005524,GO:0046316		TRUE	-0.938932	0.000124458	0.00331683	Chromosome_I	3437372	3437893	522	+	11.0544	1151.76	1087.82	1092.1	666.874	857.508	966.512	1051.32	889.587	1039.45	2677.89	3688.11	3412.47	3752.98	3879.23	4973.39	6606.91	7287.33	13887.4	1760.81	1674.45	2125.97	90.9179	86.1251	87.3241	68.8236	84.9399	90.6294	95.8952	74.0552
pgaptmp_000572	pgaptmp_000572	rpoS	protein_coding	protein_coding	pgaptmp_000572	0.4587	981	GO:0006352,GO:0006355	GO:0003677,GO:0003700,GO:0016987		TRUE	1.18002	0.000125007	0.00331683	Chromosome_I	581186	582166	981	+	10.4787	3178.51	3101.53	2354.92	2123.62	2322.65	1022.59	2147.19	3101.61	2736.92	706.301	838.124	889.244	972.123	1053.33	999.947	996.092	995.966	1043.84	990.212	1129.04	1290.2	133.51	130.662	100.196	116.62	122.422	51.0229	104.216	137.39
pgaptmp_000944	pgaptmp_000944	pgaptmp_000944	protein_coding	protein_coding	pgaptmp_000944	0.4318	264				TRUE	-1.22364	0.000125287	0.00331683	Chromosome_I	992577	992840	264	+	10.0292	589.756	793.865	684.504	861.619	832.93	1189.17	577.632	487.332	475.038	1218.87	1317.05	1352.39	1394.85	1378.54	1569.09	2290.51	1790.88	1631.25	1438.94	1054.5	1012.72	92.0506	124.275	108.221	175.823	163.135	220.482	104.179	80.2156
pgaptmp_002932	pgaptmp_002932	pgaptmp_002932	protein_coding	protein_coding	pgaptmp_002932	0.4635	192				TRUE	-0.999828	0.000125318	0.00331683	Chromosome_I	3189835	3190026	192	-	8.08937	206.607	216.509	207.475	306.211	305.863	268.017	143.294	162.693	149.901	330.953	308.401	229.721	409.47	375.158	384.697	310.12	418.093	325.455	332.492	317.942	251.727	44.3407	46.6032	45.103	85.9179	82.37	68.3273	35.5353	36.8218
pgaptmp_002526	pgaptmp_002526	ispE	protein_coding	protein_coding	pgaptmp_002526	0.4559	873	GO:0016114	GO:0050515		TRUE	-1.13212	0.000126247	0.00332104	Chromosome_I	2746096	2746968	873	+	11.8254	4436.66	4369.78	3963.26	4939.09	5138.22	4011.19	3180.69	3458.34	3344.27	3664.69	3176.53	2925.24	2698.38	3853.7	3309.44	1589.37	1665.71	1853.51	8217.3	5745.88	7251.89	209.411	206.865	189.487	304.787	304.328	224.901	173.476	172.144
pgaptmp_004069	pgaptmp_004069	elbB	protein_coding	protein_coding	pgaptmp_004069	0.4716	651				TRUE	0.827021	0.000126851	0.00332104	Chromosome_II	858905	859555	651	-	8.75019	618.28	681.21	740.049	786.667	865.018	628.397	913.965	1020.94	956.409	207.854	172.342	216.753	195.898	175.37	221.332	267.984	280.948	259.306	489.518	583.636	497.638	39.1347	43.2456	47.4483	65.099	68.705	47.2483	66.8469	68.1483
pgaptmp_004769	pgaptmp_004769	pgaptmp_004769	protein_coding	protein_coding	pgaptmp_004769	0.4522	984				TRUE	0.859258	0.000127369	0.00332104	Chromosome_II	1694876	1695859	984	+	11.0062	1885.68	2209.97	2440.69	3519.5	3461.44	4129.12	5651.59	5665.15	5402.06	1533.68	1369.66	948.527	1168.02	1214.27	861.615	1038.23	953.358	669.432	3148.9	3045.61	2722.47	78.9642	92.8183	103.528	192.686	181.889	205.397	273.469	250.181
pgaptmp_004693	pgaptmp_004693	pgaptmp_004693	protein_coding	protein_coding		0.5	1000				TRUE	-1.29993	0.000128731	0.00334004	pgaptmp_004693	1	1000	1000	+	9.48097	403.964	619.602	304.678	1525.93	1034.34	1161.96	734.29	486.586	630.569	716.391	645.827	481.674	368.228	665.962	466.379	873.056	541.923	690.6	1676.43	1503.69	1260.3	16.6456	25.6068	12.7169	82.2051	53.4817	56.8752	34.9623	21.1445
pgaptmp_003242	pgaptmp_003242	punC	protein_coding	protein_coding	pgaptmp_003242	0.4652	1206	GO:1990961	GO:0042910	GO:0016020	TRUE	0.952477	0.000131014	0.00337419	Chromosome_I	3511227	3512432	1206	+	13.1979	12546	13172.7	13752.2	9847.43	8820.18	8736.54	15406	15894.7	14838.1	5880.46	6978.93	7301.06	6413.07	6359.94	6784.89	7650.19	7893.17	18995.5	7171.21	8503.5	7430.51	428.663	451.408	475.954	439.886	378.159	354.589	608.24	572.718
pgaptmp_002575	pgaptmp_002575	treB	protein_coding	protein_coding	pgaptmp_002575	0.4842	1425	GO:0009401,GO:0015771	GO:0008982,GO:0015574	GO:0016020	TRUE	1.13545	0.000131329	0.00337419	Chromosome_I	2780525	2781949	1425	-	13.6335	27221.3	25280.5	25447.5	13137.6	14133.2	13189.7	27303.9	27477.2	26283.3	3035.08	5068.66	3645.9	4907.75	4148.94	4891.71	19544.3	18874.1	53180.2	9700.94	12868.7	13241	787.14	733.182	745.37	496.667	512.825	453.059	912.309	837.905
pgaptmp_001850	pgaptmp_001850	pgaptmp_001850	protein_coding	protein_coding	pgaptmp_001850	0.4474	1578	GO:0006508	GO:0008236		TRUE	0.723471	0.000133622	0.00340823	Chromosome_I	1980283	1981860	1578	+	7.70908	453.303	373.17	355.321	245.353	232.811	239.979	309.605	345.536	318.099	113.008	116.104	129.681	156.129	147.622	98.809	242.703	187.742	148.175	181.613	186.687	195.234	11.8369	9.77329	9.39843	8.37623	7.62851	7.44386	9.34186	9.51532
pgaptmp_003431	pgaptmp_003431	pgaptmp_003431	protein_coding	protein_coding	pgaptmp_003431	0.4562	708				TRUE	-0.970812	0.000133948	0.00340823	Chromosome_II	176620	177327	708	-	9.40606	236.673	249.073	324.282	817.417	664.296	853.532	467.748	417.18	453.925	1089.72	986.882	1172.69	826.305	879.07	973.598	861.258	924.065	825.545	931.537	911.135	716.134	13.7744	14.539	19.1175	62.1977	48.5146	59.0091	31.4566	25.6052
pgaptmp_000641	pgaptmp_000641	pgaptmp_000641	protein_coding	protein_coding	pgaptmp_000641	0.4606	1626	GO:0006826	GO:0042626,GO:0140359		TRUE	-0.85501	0.000135694	0.00341714	Chromosome_I	653537	655162	1626	+	12.0883	3240.96	3408.69	3594.87	3628.41	4682.16	4895.23	2767.88	3048.63	2648.95	4562.71	5184.76	5013.11	5386.45	3952.48	4400.3	6731.63	6134.25	6350.35	5175.14	4985.12	4692.25	82.1318	86.6381	92.2792	120.215	148.891	147.362	81.0512	81.4744
pgaptmp_003065	pgaptmp_003065	pgaptmp_003065	protein_coding	protein_coding	pgaptmp_003065	0.463	1674			GO:0098561	TRUE	1.09367	0.000136333	0.00341714	Chromosome_I	3315022	3316695	1674	-	10.9745	7787.86	7177.35	6778.88	3803.29	3798.71	2483.08	5417.71	6633.84	5897.5	593.293	740.162	759.562	721.728	710.359	766.758	659.005	644.449	748.812	2232.45	2786.93	3136.2	191.7	177.195	169.022	122.396	117.334	72.6052	154.097	172.206
pgaptmp_003643	pgaptmp_003643	pgaptmp_003643	protein_coding	protein_coding	pgaptmp_003643	0.4756	1209	GO:1901642	GO:0005337,GO:0015293	GO:0005886	TRUE	-0.806159	0.000136751	0.00341714	Chromosome_II	398683	399891	1209	+	12.236	2423.01	2301.51	2573.02	3648.27	4571.56	4402.08	3035.91	3250.13	2971.98	8257.67	11225.8	10352.3	7451.47	6318.87	7925.8	4881.02	5199.53	5563.17	4919.76	5527.98	5264.66	82.5823	78.6733	88.8295	162.564	195.516	178.223	119.563	116.818
pgaptmp_000237	pgaptmp_000237	pgaptmp_000237	protein_coding	protein_coding		0.5	1000				TRUE	-1.54846	0.000136893	0.00341714	pgaptmp_000237	1	1000	1000	+	12.3579	1633.59	1468.03	1886.88	2388.19	2934.37	5399.93	1367.61	1385.88	1221.02	19665.4	23033.9	23505.7	12731.9	9602.06	10949.4	20562.3	16634.5	14001.2	5099.14	3111.24	3066.41	67.3132	60.6706	78.7563	128.657	151.726	264.314	65.1169	60.2229
pgaptmp_002460	pgaptmp_002460	pgaptmp_002460	protein_coding	protein_coding	pgaptmp_002460	0.4714	210				TRUE	0.946159	0.000138306	0.00343611	Chromosome_I	2677968	2678177	210	-	8.82452	1065.42	1224.24	1494.8	698.904	643.131	949.194	1278.51	1117.95	1103.49	183.638	181.412	194.522	220.937	192.019	183.126	176.971	182.416	137.591	614.691	631.423	502.623	209.054	240.929	297.102	179.293	158.352	221.242	289.88	231.335
pgaptmp_002557	pgaptmp_002557	pgaptmp_002557	protein_coding	protein_coding	pgaptmp_002557	0.4352	471				TRUE	0.98883	0.000139298	0.00344451	Chromosome_I	2759840	2760310	471	-	9.42272	1669.82	1950.34	1892.6	1269.05	897.106	1448.94	2219.2	1629.17	1754.47	181.62	195.925	196.375	237.139	246.406	246.364	397.763	415.43	439.232	890.743	947.453	888.105	146.085	171.132	167.717	145.151	98.4843	150.579	224.341	150.308
pgaptmp_004668	pgaptmp_004668	vctG	protein_coding	protein_coding	pgaptmp_004668	0.4238	951				TRUE	-0.916389	0.000141688	0.00347776	Chromosome_II	1582718	1583668	951	-	7.24279	77.0923	100.333	98.0197	308.773	302.449	342.237	123.248	117.169	135.122	125.116	148.758	105.598	138.454	114.323	98.809	138.206	122.499	168.02	253.141	247.854	202.711	3.34032	4.3602	4.30203	17.4914	16.4443	17.6149	6.17066	5.35388
pgaptmp_001904	pgaptmp_001904	pgaptmp_001904	protein_coding	protein_coding	pgaptmp_001904	0.4361	477				TRUE	0.965212	0.000142434	0.00347776	Chromosome_I	2046951	2047427	477	-	7.85831	459.47	445.339	537.475	365.787	404.859	366.978	581.344	572.41	558.785	94.8462	87.0778	120.418	89.8477	86.575	104.079	119.666	134.482	137.591	225.2	316.667	299.912	39.6914	38.5846	47.0306	41.3119	43.8863	37.6577	58.0293	52.1467
pgaptmp_004271	pgaptmp_004271	pgaptmp_004271	protein_coding	protein_coding	pgaptmp_004271	0.4615	624				TRUE	1.00961	0.000143545	0.00347776	Chromosome_II	1120768	1121391	624	+	7.28244	172.687	197.146	215.643	347.85	288.112	442.847	437.307	319.415	332.174	48.4321	76.1931	40.757	85.429	57.7167	59.2854	150.004	122.499	149.498	178.26	170.758	164.495	11.4034	13.0571	14.4242	30.0312	23.8737	34.7378	33.3684	22.2438
pgaptmp_001492	pgaptmp_001492	pgaptmp_001492	protein_coding	protein_coding	pgaptmp_001492	0.3824	1122				TRUE	-1.05142	0.000143559	0.00347776	Chromosome_I	1542044	1543165	1122	+	9.08812	647.575	697.933	654.282	683.529	540.039	637.469	485.567	408.971	440.553	552.933	462.601	578.008	416.835	341.86	414.998	503.945	430.076	332.07	1062.86	855.702	780.104	23.7824	25.7076	24.3396	32.8192	24.8872	27.8099	20.6058	15.8393
pgaptmp_001602	pgaptmp_001602	pgaptmp_001602	protein_coding	protein_coding	pgaptmp_001602	0.3536	2175				TRUE	1.03635	0.000143944	0.00347776	Chromosome_I	1670038	1672212	2175	-	11.2906	4775.1	5870.38	5680.24	4329.87	4127.1	4430.12	5719.15	5080.05	5486.51	1707.23	1603.68	917.033	1061.97	1126.59	621.838	2504.56	1955.98	779.241	2900.22	2611.71	2160.86	90.4651	111.545	109.006	107.246	98.1137	99.6986	125.2	101.495
pgaptmp_004153	pgaptmp_004153	tssB	protein_coding	protein_coding	pgaptmp_004153	0.4556	507	GO:0033103	GO:0003674		TRUE	-1.58488	0.000152028	0.00365631	Chromosome_II	990643	991149	507	+	6.5587	65.5284	41.3655	38.391	101.857	98.313	61.0255	142.552	201.5	199.164	78.7021	61.6801	55.5777	61.8624	58.8266	25.0316	60.6757	62.5808	43.6586	379.432	544.77	702.01	5.32574	3.37188	3.16055	10.823	10.0264	5.89164	13.3874	17.2705
pgaptmp_005059	pgaptmp_005059	pgaptmp_005059	protein_coding	protein_coding	pgaptmp_005059	0.4742	291				TRUE	0.818144	0.000152783	0.00365775	Chromosome_II	2022748	2023038	291	-	9.70434	670.703	847.553	791.509	1280.58	1354.54	1149.59	1529.46	1519.46	1454.67	615.491	876.221	842.929	502.264	443.975	462.426	768.559	664.421	542.426	713.042	895.843	860.69	94.9719	120.369	113.528	237.07	240.681	193.367	250.253	226.9
pgaptmp_000323	pgaptmp_000323	pgaptmp_000323	protein_coding	protein_coding	pgaptmp_000323	0.384	810	GO:0009307	GO:0009007		TRUE	-0.819845	0.000156888	0.00373904	Chromosome_I	342615	343424	810	+	13.1738	9073.76	8600.5	8340.66	7293.97	8476.77	8420.69	5780.03	6021.13	6352.13	10057.7	10367.7	11541.6	11946.8	10056	11004.7	12335.7	11261.9	10332.5	10373.2	10285.6	10409.7	461.594	438.814	429.79	485.113	541.115	508.857	339.764	323.021
pgaptmp_004238	pgaptmp_004238	cyoE	protein_coding	protein_coding	pgaptmp_004238	0.4765	873	GO:0048034	GO:0008495	GO:0016020	TRUE	0.83022	0.0001595	0.00378418	Chromosome_II	1089231	1090103	873	+	11.9504	1928.85	1827.12	2437.42	2017.92	2627.83	2424.53	3453.17	3879.26	3451.94	9141.56	9099.63	8623.81	8005.29	5961.47	5682.18	6928.83	7384.53	9223.88	1774.22	1957.35	2145.08	91.0421	86.4958	116.535	124.524	155.642	135.939	188.337	193.095
pgaptmp_004423	pgaptmp_004423	cobA	protein_coding	protein_coding	pgaptmp_004423	0.4585	759	GO:0019354	GO:0004851		TRUE	0.909736	0.000163102	0.00385229	Chromosome_II	1293073	1293831	759	-	9.20059	1776.98	2569.94	3060.67	4336.92	3884.73	3683.79	4207.51	3992.69	3949.5	82.7381	54.4236	79.6614	54.4978	54.3869	71.1425	79.2155	58.5863	70.1184	2227.98	2224.32	1799.47	96.4713	139.934	168.312	307.825	264.645	237.567	263.946	228.592
pgaptmp_003089	pgaptmp_003089	gmk	protein_coding	protein_coding	pgaptmp_003089	0.4439	624	GO:0006163	GO:0004385		TRUE	-1.10329	0.000168009	0.003934	Chromosome_I	3341537	3342160	624	+	12.5315	4836	4758.79	4545.66	4283.75	4490.99	4520.83	3028.48	3209.83	3277.41	12568.1	12225.4	14587.3	7445.58	9855.12	9779.46	5302.38	5690.86	4216.37	8000.49	5656.68	6148.61	319.345	315.176	304.056	369.831	372.136	354.623	231.086	223.529
pgaptmp_003957	pgaptmp_003957	pgaptmp_003957	protein_coding	protein_coding	pgaptmp_003957	0.4248	306				TRUE	1.27139	0.000168056	0.003934	Chromosome_II	726146	726451	306	-	7.41196	133.37	168.102	143.762	277.384	221.204	305.127	386.078	238.069	319.507	209.872	154.2	96.3347	83.9561	130.972	80.3647	241.017	198.394	149.498	138.026	113.414	114.648	17.9595	22.7036	19.6094	48.8341	37.378	48.8082	60.0739	33.808
pgaptmp_005205	pgaptmp_005205	pgaptmp_005205	protein_coding	protein_coding	pgaptmp_005205	0.4375	2151	GO:0045226			TRUE	0.888825	0.000170004	0.00396061	Chromosome_II	2175829	2177979	2151	+	12.4063	5417.27	5608.1	4990.84	9167.75	9075.52	5923.59	8057.15	9244.39	8577.42	8481.67	7376.22	4453.63	3068.08	4430.87	2150.08	5580.48	4400.63	3062.72	4713.56	4078.44	4744.59	103.776	107.75	96.8443	229.608	218.16	134.796	178.35	186.756
pgaptmp_003834	pgaptmp_003834	pgaptmp_003834	protein_coding	protein_coding	pgaptmp_003834	0.4337	309				TRUE	0.786035	0.000170697	0.00396061	Chromosome_II	599111	599419	309	-	8.28397	308.369	411.895	389.628	562.454	517.509	697.67	674.151	641.816	658.719	157.404	128.803	170.438	213.572	163.161	158.094	188.769	178.422	240.784	395.079	376.56	328.159	41.1217	55.0896	52.6299	98.0603	86.5971	110.516	103.88	90.2588
pgaptmp_000238	pgaptmp_000238	pgaptmp_000238	protein_coding	protein_coding		0.5	1000				TRUE	-1.47241	0.000172828	0.00399247	pgaptmp_000238	1	1000	1000	+	11.9019	1153.3	1099.27	1291.41	1588.71	1981.28	3635.96	931.784	1036.61	880.403	13575.1	16802.4	17940.5	11490.2	7239	8353.97	15767.2	13514.8	11549.7	3450.65	2064.39	2163.35	47.5227	45.4302	53.902	85.5872	102.445	177.972	44.3658	45.0455
pgaptmp_001866	pgaptmp_001866	pgaptmp_001866	protein_coding	protein_coding	pgaptmp_001866	0.4576	531		GO:0004527		TRUE	-0.861384	0.000173988	0.00399377	Chromosome_I	1998981	1999511	531	-	9.87838	734.689	832.591	870.742	887.243	801.524	1180.93	656.332	574.649	601.011	1166.41	1271.7	1506.16	1299.11	1114.38	1093.49	768.559	1042.57	766.011	1212.06	974.214	1053.43	57.0122	64.8005	68.4441	90.0144	78.0488	108.858	58.8521	47.0268
pgaptmp_004422	pgaptmp_004422	pgaptmp_004422	protein_coding	protein_coding	pgaptmp_004422	0.4558	441				TRUE	0.771098	0.000174401	0.00399377	Chromosome_II	1292611	1293051	441	+	7.18167	422.466	633.684	655.098	862.259	862.97	460.165	683.061	705.251	744.578	20.18	25.3977	20.3785	17.675	21.0888	21.0793	20.2252	22.6356	31.7517	378.873	447.284	376.344	39.474	59.3849	62.0024	105.333	101.181	51.0749	73.7485	69.4933
pgaptmp_002307	pgaptmp_002307	pgaptmp_002307	protein_coding	protein_coding	pgaptmp_002307	0.4731	744				TRUE	0.986415	0.000177579	0.00403186	Chromosome_I	2510658	2511401	744	-	8.63855	1120.92	1459.23	1480.1	809.089	749.637	878.272	1715.82	1494.09	1348.4	50.4501	83.4496	75.9562	153.183	106.554	93.5392	155.06	153.123	178.604	673.925	856.339	690.379	62.0813	81.0576	83.0345	58.5851	52.0981	57.7815	109.807	87.2651
pgaptmp_004314	pgaptmp_004314	pgaptmp_004314	protein_coding	protein_coding	pgaptmp_004314	0.4604	480			GO:0005886	TRUE	1.00437	0.000177595	0.00403186	Chromosome_II	1170376	1170855	480	+	11.5053	2291.18	3112.09	3110.49	5105.65	4439.11	6982.47	6932.32	6051.73	5187.41	1479.2	1442.23	1187.51	1481.75	1265.33	1035.52	2925.92	2741.57	7152.08	2952.75	3120.16	2695.89	196.687	267.95	270.476	573.026	478.188	712.034	687.655	547.868
pgaptmp_001716	pgaptmp_001716	cobB	protein_coding	protein_coding	pgaptmp_001716	0.4495	732		GO:0070403		TRUE	0.807595	0.000179574	0.00405929	Chromosome_I	1812993	1813724	732	-	9.26301	1299.78	1542.84	1768.44	1283.14	1116.95	1198.24	2057.35	1691.86	1747.43	199.782	221.323	220.458	145.818	234.197	193.666	220.792	242.334	259.306	998.035	1053.22	983.645	73.1671	87.107	100.837	94.4337	78.8978	80.1248	133.823	100.436
pgaptmp_005280	pgaptmp_005280	pgaptmp_005280	protein_coding	protein_coding	pgaptmp_005280	0.4484	252				TRUE	1.15779	0.000181433	0.00406705	Chromosome_II	2262995	2263246	252	+	8.10427	340.748	328.284	346.336	696.342	761.243	600.359	887.236	996.308	916.999	62.5581	119.732	53.7251	136.981	75.4757	100.126	124.722	197.063	242.107	333.051	512.912	359.728	55.7174	53.8382	57.3639	148.863	156.195	116.612	167.638	171.803
pgaptmp_000040	pgaptmp_000040	pgaptmp_000040	protein_coding	protein_coding	pgaptmp_000040	0.4468	282				TRUE	-1.04613	0.000182262	0.00406705	Chromosome_I	44259	44540	282	+	10.6993	799.447	1096.63	883.811	1470.2	1262.37	1968.48	1039.44	734.357	924.036	2966.47	2668.57	2576.95	1490.59	1882.45	1670.53	3820.88	2814.8	3566.78	1887.1	1600.54	1933.23	116.815	160.713	130.813	280.86	231.462	341.677	175.502	113.161
pgaptmp_000591	pgaptmp_000591	oadA	protein_coding	protein_coding	pgaptmp_000591	0.4822	1794	GO:0006814	GO:0008948,GO:0015081		TRUE	0.740569	0.000182902	0.00406705	Chromosome_I	594118	595911	1794	+	9.62717	1017.62	964.608	1016.14	719.403	678.633	686.949	742.457	855.257	807.916	647.779	751.046	737.331	1179.8	1073.31	1136.96	876.426	1011.94	908.893	443.695	495.708	447.791	23.3733	22.2213	23.6413	21.603	19.5594	18.7428	19.7052	20.7163
pgaptmp_001652	pgaptmp_001652	pgaptmp_001652	protein_coding	protein_coding	pgaptmp_001652	0.4548	1317	GO:0055085	GO:0015562	GO:0019867	TRUE	0.868727	0.000183006	0.00406705	Chromosome_I	1727536	1728852	1317	-	6.95305	304.514	300.12	298.96	206.917	206.867	145.966	252.435	254.488	273.059	52.4681	70.7507	48.1674	50.0791	89.9048	61.9203	72.4737	67.9068	41.0127	121.262	124.246	160.341	9.52753	9.41782	9.47476	8.46396	8.12175	5.425	9.12636	8.39689
pgaptmp_000112	pgaptmp_000112	dinF	protein_coding	protein_coding	pgaptmp_000112	0.4911	1344	GO:0055085	GO:0015297,GO:0042910	GO:0016020	TRUE	-0.709357	0.000183926	0.00407032	Chromosome_I	117136	118479	1344	+	9.81974	536.562	579.997	630.593	566.939	647.227	672.105	444.732	457.481	481.372	992.858	1302.54	1209.74	1695.32	1309.72	1392.55	2411.86	2264.89	2346.98	698.513	795.81	711.149	16.4505	17.8348	19.5835	22.7248	24.9001	24.4777	15.7555	14.7915
pgaptmp_002378	pgaptmp_002378	pgaptmp_002378	protein_coding	protein_coding	pgaptmp_002378	0.3895	765				TRUE	-0.808427	0.000185868	0.0040961	Chromosome_I	2591297	2592061	765	+	10.0698	1272.02	1294.65	1238.32	1478.52	1349.76	1001.97	867.933	857.496	970.484	1077.61	896.176	941.116	929.409	1240.91	1007.85	780.357	741.649	697.215	1484.2	1388.37	1721.38	68.5159	69.9412	67.5633	104.119	91.23	64.1102	54.0203	48.7089
pgaptmp_002735	pgaptmp_002735	pgaptmp_002735	protein_coding	protein_coding		0.5	1000				TRUE	-1.43533	0.00018782	0.00412187	pgaptmp_002735	1	1000	1000	+	11.7381	1384.58	1618.53	1719.43	2363.2	2572.52	3625.24	1709.88	1187.36	1315.33	16620.3	9103.26	9768.71	3583.6	4013.53	3696.78	7159.73	5098.34	5143.78	4555.42	3611.41	2884.47	57.0526	66.8904	71.7671	127.311	133.016	177.448	81.4138	51.5964
pgaptmp_000672	pgaptmp_000672	secG	protein_coding	protein_coding	pgaptmp_000672	0.4513	339	GO:0015739	GO:0015136	GO:0016020	TRUE	-1.04747	0.000191171	0.004178	Chromosome_I	697305	697643	339	+	14.6769	11297.9	12005.7	12642.1	15525.1	15698.7	20168.1	10164.2	9472.01	9730.88	67919.9	72544.9	73627.5	49735.9	46261	48892	71774.3	62506.2	56708.6	22766.5	18193.4	17813.6	1373.27	1463.62	1556.54	2467.18	2394.46	2912.04	1427.6	1214.17
pgaptmp_005220	pgaptmp_005220	pgaptmp_005220	protein_coding	protein_coding	pgaptmp_005220	0.4845	741				TRUE	1.14529	0.000194476	0.00422119	Chromosome_II	2190804	2191544	741	-	8.75666	3761.33	3511.67	3070.47	2683.51	3100.96	2351.95	3850.38	4768.1	4544.18	28.252	14.513	31.494	32.4041	29.9683	38.2062	37.0796	30.6246	68.7954	1507.11	1952.25	2309.57	209.161	195.856	172.953	195.096	216.382	155.362	247.411	279.617
pgaptmp_000458	pgaptmp_000458	pgaptmp_000458	protein_coding	protein_coding		0.5	1000				TRUE	-1.52204	0.000195342	0.00422119	pgaptmp_000458	1	1000	1000	+	9.67617	225.88	314.202	229.529	840.478	531.163	651.488	396.472	282.101	287.838	2579.01	2298.49	2569.54	1350.66	1277.54	1181.76	1965.22	1439.36	1528.05	729.247	772.235	1236.2	9.30758	12.9852	9.58031	45.2784	27.4645	31.8889	18.8775	12.2586
pgaptmp_004070	pgaptmp_004070	pgaptmp_004070	protein_coding	protein_coding	pgaptmp_004070	0.4218	147				TRUE	0.876475	0.000195552	0.00422119	Chromosome_II	859568	859714	147	-	6.85293	133.37	134.658	193.589	187.058	192.53	154.213	210.115	202.247	227.314	92.8282	74.379	85.2192	57.4436	48.8372	32.9363	117.98	129.156	85.9943	106.733	125.52	95.5399	37.385	37.8579	54.9673	68.5524	67.7211	51.3495	68.0571	59.7863
pgaptmp_002464	pgaptmp_002464	pgaptmp_002464	protein_coding	protein_coding	pgaptmp_002464	0.468	735				TRUE	1.277	0.000200637	0.00431329	Chromosome_I	2679870	2680604	735	-	7.78471	557.377	577.357	597.92	242.15	284.015	316.673	671.181	602.262	555.97	84.7561	70.7507	59.2829	122.252	104.334	152.825	111.239	106.52	144.206	184.966	312.844	222.649	31.2478	32.4637	33.9545	17.7485	19.9801	21.089	43.4796	35.607
pgaptmp_002463	pgaptmp_002463	pgaptmp_002463	protein_coding	protein_coding	pgaptmp_002463	0.4684	792				TRUE	0.852427	0.000202171	0.00432859	Chromosome_I	2679082	2679873	792	-	7.85568	467.179	491.105	520.321	249.837	361.847	321.621	453.641	442.555	435.627	100.9	101.591	90.777	197.37	157.611	191.031	114.61	113.178	148.175	203.966	274.615	227.634	24.3062	25.6266	27.4213	16.994	23.6234	19.877	27.2722	24.2817
pgaptmp_005309	pgaptmp_005309	pgaptmp_005309	protein_coding	protein_coding	pgaptmp_005309	0.4661	369			GO:0005886	TRUE	0.69322	0.000208806	0.00445255	Chromosome_II	2295936	2296304	369	-	7.76906	159.581	193.626	185.421	224.854	250.562	333.166	376.426	350.014	346.953	143.278	157.829	163.028	225.356	160.941	160.729	217.421	238.34	226.231	201.172	226.828	207.695	17.8202	21.6859	20.9736	32.8275	35.1101	44.1944	48.572	41.2189
pgaptmp_003523	pgaptmp_003523	pgaptmp_003523	protein_coding	protein_coding	pgaptmp_003523	0.4717	1734				TRUE	1.58684	0.000212638	0.00451598	Chromosome_II	275006	276739	1734	+	10.6782	3345.03	2658.83	2091.9	2495.17	2669.47	1157.01	3058.92	4550.18	4272.52	1230.98	1329.75	650.259	998.635	1121.04	675.854	1597.79	1275.58	1182.75	895.773	1275.59	1660.73	79.4895	63.37	50.3539	77.5203	79.6013	32.6603	83.9948	114.029
pgaptmp_002258	pgaptmp_002258	rsmS	protein_coding	protein_coding	pgaptmp_002258	0.3758	165				TRUE	-0.70212	0.000218947	0.00463129	Chromosome_I	2448303	2448467	165	+	8.06362	314.536	330.044	343.886	343.366	284.015	322.445	259.118	246.278	249.131	207.854	150.572	188.964	232.72	196.459	180.491	289.895	239.671	224.908	430.843	389.303	381.329	78.5498	82.6665	86.9904	112.108	89.0024	95.6544	74.7732	64.8604
pgaptmp_001879	pgaptmp_001879	pgaptmp_001879	protein_coding	protein_coding	pgaptmp_001879	0.4491	1779	GO:0055085	GO:0005524,GO:0042626,GO:0140359	GO:0016020	TRUE	0.669997	0.000222687	0.00468171	Chromosome_I	2014774	2016552	1779	+	8.47733	433.259	554.474	567.697	393.974	422.61	449.444	591.738	562.709	543.302	234.088	188.669	251.952	282.799	350.74	312.237	261.243	256.981	214.324	347.58	350.437	328.159	10.0353	12.8809	13.3193	11.9304	12.2831	12.3661	15.8375	13.745
pgaptmp_001372	pgaptmp_001372	pgaptmp_001372	protein_coding	protein_coding	pgaptmp_001372	0.41	522		GO:0008080,GO:0016746		TRUE	0.700075	0.000225998	0.00468171	Chromosome_I	1437519	1438040	522	+	7.73442	282.158	264.035	342.252	262.65	310.642	244.102	288.816	287.325	277.985	157.404	228.579	194.522	160.548	163.161	151.507	200.567	183.748	127.007	164.849	180.316	156.187	22.273	20.9042	27.3663	27.1063	30.7704	22.8893	26.3441	23.9188
pgaptmp_001070	pgaptmp_001070	pgaptmp_001070	protein_coding	protein_coding	pgaptmp_001070	0.3736	174				TRUE	-1.14604	0.000226382	0.00468171	Chromosome_I	1141645	1141818	174	+	9.68696	1019.93	1001.57	712.276	778.339	703.894	705.092	605.845	424.643	541.895	1473.14	1099.36	1059.68	583.274	1041.12	787.837	1048.34	624.476	566.239	1339.47	1011.17	1040.97	241.535	237.889	170.86	240.982	209.171	198.349	165.785	106.05
pgaptmp_002736	pgaptmp_002736	pgaptmp_002736	protein_coding	protein_coding		0.5	1000				TRUE	-1.42827	0.000227427	0.00468171	pgaptmp_002736	1	1000	1000	+	13.0115	3415.96	4183.2	4147.87	5990.97	5429.06	8692.01	4234.23	2776.97	2985.35	32288.1	17107.2	24294.9	9087.88	11192.6	9971.81	20609.5	12759.8	13440.2	10106.1	9045.72	6914.59	140.757	172.882	173.127	322.746	280.717	425.454	201.608	120.673
pgaptmp_005281	pgaptmp_005281	pgaptmp_005281	protein_coding	protein_coding	pgaptmp_005281	0.4463	726				TRUE	0.825102	0.000227811	0.00468171	Chromosome_II	2263276	2264001	726	-	10.0351	1416.96	1467.15	1599.35	3598.94	3401.36	2738.72	4081.29	4228.52	4275.34	173.548	319.285	192.669	328.46	188.689	233.189	480.349	466.027	783.21	2026.8	2600.24	2252.25	80.4226	83.5182	91.9494	267.056	242.248	184.648	267.666	253.099
pgaptmp_003158	pgaptmp_003158	uspA	protein_coding	protein_coding	pgaptmp_003158	0.4624	426				TRUE	1.22881	0.000228705	0.00468171	Chromosome_I	3422151	3422576	426	+	11.0831	7052.4	9130.33	10861.4	4912.83	4208.34	6519.01	12060.5	9277.97	8502.12	290.593	370.081	257.51	512.574	405.127	450.569	775.3	814.882	1139.09	4659.92	4189.31	3465.19	682.159	885.765	1064.18	621.278	510.794	749.039	1347.99	946.414
pgaptmp_001206	pgaptmp_001206	pgaptmp_001206	protein_coding	protein_coding	pgaptmp_001206	0.4756	513				TRUE	0.962399	0.000229541	0.00468171	Chromosome_I	1285666	1286178	513	-	9.97819	7268.26	8918.22	8676.38	4819.94	3990.55	3924.6	10194.7	7936.13	8224.13	62.5581	107.033	92.6295	100.158	106.554	151.507	55.6194	115.841	71.4414	3913.35	4604.1	4594.22	583.81	718.46	705.931	506.161	402.216	374.464	946.213	672.247
pgaptmp_000427	pgaptmp_000427	pyrI	protein_coding	protein_coding	pgaptmp_000427	0.4524	462	GO:0006207		GO:0009347	TRUE	-0.651551	0.000229597	0.00468171	Chromosome_I	461437	461898	462	-	8.52143	421.695	378.45	462.326	411.911	346.144	258.946	310.347	319.415	311.062	405.619	308.401	437.211	285.745	340.75	372.839	310.12	402.115	301.642	455.989	470.859	518.408	37.611	33.8539	41.7684	48.0315	38.7399	27.4347	31.9844	30.0436
pgaptmp_004298	pgaptmp_004298	pgaptmp_004298	protein_coding	protein_coding	pgaptmp_004298	0.4644	1305				TRUE	-0.800505	0.000230152	0.00468171	Chromosome_II	1154170	1155474	1305	-	12.5187	4230.82	4061.74	3677.37	7131.25	7824.08	4647.83	4499.29	5027.81	4906.61	7079.16	7231.09	7228.81	7112.7	8615.33	8878.32	4164.71	4117.02	4085.39	7952.43	7645.89	8792.99	133.59	128.63	117.616	294.388	310.004	174.33	164.16	167.419
pgaptmp_005256	pgaptmp_005256	speF	protein_coding	protein_coding	pgaptmp_005256	0.4649	2181	GO:0006520	GO:0004586		TRUE	-0.90427	0.000230219	0.00468171	Chromosome_II	2234718	2236898	2181	-	7.53466	288.325	271.956	218.911	226.135	206.867	204.518	357.864	287.325	292.764	108.972	78.0072	74.1036	82.4832	65.4862	98.809	124.722	101.194	95.2552	496.782	576.627	648.84	5.44735	5.15329	4.1894	5.58568	4.90433	4.58995	7.8126	5.72473
pgaptmp_002371	pgaptmp_002371	pgaptmp_002371	protein_coding	protein_coding	pgaptmp_002371	0.4596	792	GO:0019290	GO:0008667		TRUE	-0.767005	0.000232932	0.00471866	Chromosome_I	2585445	2586236	792	+	7.83632	282.929	259.634	309.579	189.62	207.55	146.791	239.071	202.993	225.203	161.44	157.829	96.3347	163.493	267.495	329.363	183.712	226.356	291.058	329.698	395.038	391.298	14.7201	13.5481	16.315	12.898	13.5501	9.07208	14.3726	11.1376
pgaptmp_001931	pgaptmp_001931	pgaptmp_001931	protein_coding	protein_coding	pgaptmp_001931	0.4534	1941				TRUE	0.846724	0.000235121	0.00474477	Chromosome_I	2081828	2083768	1941	+	9.39462	3222.46	2890.3	2728.22	2158.85	1966.26	1128.97	2503.57	2896.38	2857.97	98.8822	154.2	124.124	163.493	175.37	146.237	131.464	133.151	203.74	1292.53	1475.66	1679.01	68.41	61.5403	58.667	59.9186	52.3793	28.4702	61.4138	64.8437
pgaptmp_000242	pgaptmp_000242	pgaptmp_000242	protein_coding	protein_coding		0.5	1000				TRUE	-1.21412	0.000237261	0.00476967	pgaptmp_000242	1	1000	1000	+	11.0201	634.469	713.775	874.009	805.245	1078.03	1540.48	651.878	641.07	547.525	6879.37	7252.86	8657.16	6022.74	3943.6	4669.06	7882.78	6709.46	5889.95	1771.99	1190.85	1193.83	26.1438	29.4987	36.4802	43.3803	55.741	75.4031	31.0384	27.8575
pgaptmp_002533	pgaptmp_002533	pgaptmp_002533	protein_coding	protein_coding		0.5	1000				TRUE	-1.37852	0.000239153	0.00478942	pgaptmp_002533	1	1000	1000	+	13.853	5192.16	4980.58	7111.33	10135.7	11228.9	15784.2	5436.27	5036.76	4302.08	54532.5	53489.4	49254.8	23126.2	18499.3	21453.4	45865.8	32542	27286.6	15601.4	12131.5	9451.8	213.947	205.836	296.819	546.032	580.603	772.599	258.842	218.871
pgaptmp_002455	pgaptmp_002455	pgaptmp_002455	protein_coding	protein_coding	pgaptmp_002455	0.4441	876				TRUE	-0.798448	0.000241032	0.00480877	Chromosome_I	2674790	2675665	876	+	12.0841	4043.49	4130.39	4154.4	5081.95	4610.47	4784.73	3112.38	3283.71	3168.33	5626.19	4678.62	5189.11	4119.74	4405.34	4301.49	4058.53	4031.8	3614.41	5919.48	5018.25	5188.23	190.2	194.863	197.945	312.529	272.135	267.353	169.169	162.891
pgaptmp_002780	pgaptmp_002780	vpsR	protein_coding	protein_coding	pgaptmp_002780	0.4449	1335				TRUE	-1.04293	0.000242445	0.0048187	Chromosome_I	3010302	3011636	1335	-	11.5193	2335.9	2657.95	2821.33	2304.27	2206.58	3379.49	2683.24	2319.49	2328.04	3220.73	3249.09	2977.11	2872.18	2856.98	2446.51	3219.18	2817.47	2354.92	5792.07	4693.94	4150.58	72.0992	82.2825	88.2092	92.9857	85.4639	123.909	95.6998	75.5004
pgaptmp_001031	pgaptmp_001031	pgaptmp_001031	protein_coding	protein_coding		0.5	1000				TRUE	-1.72517	0.000244857	0.00484836	pgaptmp_001031	1	1000	1000	+	7.90878	164.977	209.468	178.886	479.175	279.236	460.99	161.856	142.543	153.42	312.791	148.758	276.036	203.262	139.852	152.825	301.693	206.383	177.281	633.132	578.539	295.758	6.79803	8.65683	7.4665	25.8142	14.4383	22.5644	7.70656	6.19417
pgaptmp_000984	pgaptmp_000984	rlmA	protein_coding	protein_coding	pgaptmp_000984	0.4484	843		GO:0008168		TRUE	-0.992604	0.000248939	0.00488063	Chromosome_I	1040648	1041490	843	-	10.3131	1303.63	1453.07	1522.57	1119.78	949.677	1285.66	1027.56	891.08	829.732	1519.56	1444.04	1508.01	955.921	1250.9	1305.6	1417.45	1222.32	1058.39	2085.48	1619.02	1609.22	63.7214	71.2363	75.3861	71.5601	58.2495	74.6502	58.038	45.9332
pgaptmp_000958	pgaptmp_000958	pgaptmp_000958	protein_coding	protein_coding	pgaptmp_000958	0.4598	1107	GO:0000160			TRUE	0.805618	0.000249928	0.00488063	Chromosome_I	1011889	1012995	1107	+	10.8226	3069.81	3887.48	4218.11	3140.9	3176.74	3066.94	4669.31	4359.87	4228.89	633.653	781.886	679.901	854.29	742.547	819.456	862.943	878.794	1005.47	2404	2704.73	2232.31	114.267	145.132	159.042	152.852	148.381	135.61	200.834	171.145
pgaptmp_002009	pgaptmp_002009	pgaptmp_002009	protein_coding	protein_coding	pgaptmp_002009	0.4581	906		GO:0004427		TRUE	-0.843261	0.000250056	0.00488063	Chromosome_I	2175024	2175929	906	-	13.3743	8803.94	9794.82	10182.6	10348.4	8897.33	11665.8	7444.62	6709.22	7077.71	15518.4	14133.8	16538.1	10264.7	10921.8	10913.8	11715.5	10670.7	10261.1	13226.5	11672.7	12014.8	400.412	446.797	469.107	615.331	507.78	630.257	391.243	321.796
pgaptmp_004818	pgaptmp_004818	pgaptmp_004818	protein_coding	protein_coding	pgaptmp_004818	0.4537	540		GO:0016209,GO:0016491		TRUE	0.788061	0.000250193	0.00488063	Chromosome_II	1747639	1748178	540	+	8.66918	593.611	721.696	812.747	894.93	658.834	857.655	1412.9	1121.69	1213.99	179.602	156.014	129.681	167.912	134.302	192.348	112.924	187.742	153.467	719.189	663.281	712.81	45.2966	55.2334	62.8206	89.2811	63.085	77.7413	124.58	90.2641
pgaptmp_004705	pgaptmp_004705	pgaptmp_004705	protein_coding	protein_coding	pgaptmp_004705	0.4469	405				TRUE	0.991277	0.000251776	0.00489337	Chromosome_II	1621847	1622251	405	-	6.07157	80.176	81.8509	91.4851	74.3106	83.9757	117.103	155.174	126.124	127.38	34.3061	38.0966	31.494	82.4832	42.1776	36.8887	42.1359	59.9178	47.6276	50.8517	70.7245	68.1241	8.15732	8.35237	9.42836	9.88462	10.7212	14.1529	18.243	13.5326
pgaptmp_003311	pgaptmp_003311	pgaptmp_003311	protein_coding	protein_coding	pgaptmp_003311	0.4307	267				TRUE	-0.868256	0.000258289	0.00500151	Chromosome_II	48825	49091	267	+	10.5039	423.237	513.108	561.98	1143.49	782.408	1756.54	921.39	686.594	800.175	3287.33	2612.34	3249.44	1986.96	1654.92	1768.02	4801.81	3512.51	3232.06	1503.2	1407.48	1364.14	65.3176	79.4217	87.8517	230.719	151.519	322.018	164.31	111.745
pgaptmp_003925	pgaptmp_003925	pyrC	protein_coding	protein_coding	pgaptmp_003925	0.4791	1029	GO:0019856	GO:0004151		TRUE	-0.744803	0.000262052	0.00504719	Chromosome_II	696226	697254	1029	-	10.6231	825.658	836.111	913.217	1781.53	1803.77	1642.74	1397.3	1288.86	1389.93	1594.22	1801.42	1687.71	1430.2	1644.93	1720.59	2145.56	2155.71	1741.05	2343.65	2272.1	2012.15	33.0631	33.5807	37.0424	93.2701	90.6379	78.1423	64.6559	54.4285
pgaptmp_004768	pgaptmp_004768	aroG	protein_coding	protein_coding	pgaptmp_004768	0.452	1053	GO:0009073	GO:0003849		TRUE	0.658656	0.000263321	0.00504719	Chromosome_II	1693347	1694399	1053	-	9.77131	704.623	735.778	823.365	1063.41	1030.92	992.901	1213.18	1234.38	1372.33	787.021	747.418	739.184	970.65	977.854	967.011	660.691	636.46	759.396	751.6	783.066	803.366	27.5732	28.8775	32.6366	54.4047	50.6222	46.1541	54.8565	50.9397
pgaptmp_001363	pgaptmp_001363	pgaptmp_001363	protein_coding	protein_coding	pgaptmp_001363	0.4235	510				TRUE	0.655609	0.000263523	0.00504719	Chromosome_I	1430954	1431463	510	-	8.38702	501.871	567.675	588.118	538.752	627.428	439.548	556.843	557.484	564.415	191.71	172.342	172.291	215.045	220.877	208.158	215.736	202.389	228.877	310.14	358.082	358.067	40.549	46.0014	48.1322	56.9092	63.6118	42.1861	51.9871	47.5007
pgaptmp_004382	pgaptmp_004382	pgaptmp_004382	protein_coding	protein_coding	pgaptmp_004382	0.4512	1188		GO:0008483,GO:0030170		TRUE	0.826557	0.000265213	0.00506115	Chromosome_II	1246060	1247247	1188	-	12.4883	6404.83	7356.02	7163.61	10288.8	10341.3	8202.98	12109.5	13972.2	13022.4	3089.56	3103.96	3188.31	3835.47	3438.58	3412.21	3072.55	2987.9	2978.05	6733.66	7498.7	7136.41	222.151	255.899	251.684	466.566	450.093	337.978	485.335	511.076
pgaptmp_000959	pgaptmp_000959	pgaptmp_000959	protein_coding	protein_coding	pgaptmp_000959	0.3561	132				TRUE	-1.50327	0.000268582	0.00509331	Chromosome_I	1013223	1013354	132	+	9.29057	376.981	427.737	347.97	692.498	700.48	1036.61	412.064	328.371	339.916	762.805	562.378	537.251	434.51	610.465	538.839	1350.03	949.364	1055.75	1361.26	903.489	730.257	117.68	133.92	110.029	282.624	274.389	384.391	148.636	108.101
pgaptmp_000432	pgaptmp_000432	rraB	protein_coding	protein_coding	pgaptmp_000432	0.4173	417				TRUE	-1.30486	0.000268833	0.00509331	Chromosome_I	466098	466514	417	+	12.0202	1447.02	1835.04	2136.01	2893.63	2639.43	4821.01	2077.4	1353.04	1465.93	8980.12	10280.6	9670.52	6010.96	5313.27	6232.87	12772.2	10156.7	8346.74	4667.74	3603.12	3466.85	142.987	181.866	213.8	373.827	327.279	565.894	237.201	140.997
pgaptmp_000216	pgaptmp_000216	frdD	protein_coding	protein_coding	pgaptmp_000216	0.4735	378				TRUE	1.06724	0.000272052	0.00513584	Chromosome_I	234765	235142	378	-	10.0115	2243.39	1779.6	1393.51	1101.21	1097.83	880.746	1216.15	1802.31	1460.3	789.039	627.686	600.239	751.186	1078.86	992.043	1218.57	1098.49	980.335	612.456	662.644	789.242	244.551	194.568	153.872	156.943	150.171	114.049	153.189	207.193
pgaptmp_001887	pgaptmp_001887	pgaptmp_001887	protein_coding	protein_coding	pgaptmp_001887	0.4444	1125				TRUE	0.913972	0.00027713	0.00521302	Chromosome_I	2026712	2027836	1125	-	10.3176	9170.13	9874.03	10038.9	6185.08	6722.15	4931.52	10672.1	11363.1	10892.8	115.026	92.5202	101.893	110.469	115.433	89.5869	150.004	130.488	146.852	4870.03	6511.11	5558.76	335.878	362.73	372.454	296.181	308.958	214.566	451.678	438.918
pgaptmp_002561	pgaptmp_002561	rsfS	protein_coding	protein_coding	pgaptmp_002561	0.4528	318	GO:0017148	GO:0043022		TRUE	-0.705658	0.0002814	0.00525941	Chromosome_I	2764883	2765200	318	+	10.2449	918.169	917.082	928.737	816.135	985.179	893.941	631.831	688.833	611.567	2235.95	2505.3	2671.44	2358.13	2013.42	2329.26	1193.29	1427.37	1271.39	951.654	993.965	1124.88	118.974	119.185	121.901	138.261	160.189	137.599	94.6034	94.1292
pgaptmp_001331	pgaptmp_001331	pgaptmp_001331	protein_coding	protein_coding	pgaptmp_001331	0.3844	333				TRUE	0.782783	0.000281953	0.00525941	Chromosome_I	1403246	1403578	333	+	8.3976	447.135	543.032	487.648	474.05	507.268	508.821	475.173	458.227	482.075	371.313	317.471	153.765	279.854	216.438	135.698	417.988	378.148	178.604	300.081	241.483	245.911	55.329	67.3943	61.1228	76.691	78.7657	74.7917	67.9423	59.7962
pgaptmp_005042	pgaptmp_005042	pgaptmp_005042	protein_coding	protein_coding	pgaptmp_005042	0.4653	1629			GO:0098561	TRUE	-0.892963	0.000282592	0.00525941	Chromosome_II	2000957	2002585	1629	-	12.0862	3223.23	3521.35	3660.22	3692.47	3108.47	3339.08	2958.69	3072.51	2890.34	7956.99	8401.2	9149.95	3988.65	4952.54	4828.47	4397.3	4388.64	3562.81	6222.91	4847.49	4985.52	81.532	89.3366	93.7836	122.112	98.6664	100.332	86.4792	81.9614
pgaptmp_004659	pgaptmp_004659	pgaptmp_004659	protein_coding	protein_coding	pgaptmp_004659	0.4539	987		GO:0003924,GO:0005525		TRUE	0.72477	0.000284317	0.00527287	Chromosome_II	1574341	1575327	987	-	10.7501	2028.3	2309.43	2358.19	2328.61	2178.59	2436.07	3718.97	3315.8	3208.44	1198.69	1173.74	1306.08	1225.46	1048.89	1052.65	928.675	949.364	947.26	1901.07	2073.95	2027.11	84.6784	96.7005	99.7247	127.1	114.131	120.811	179.406	145.985
pgaptmp_000768	pgaptmp_000768	tcdA	protein_coding	protein_coding	pgaptmp_000768	0.4667	810		GO:0008641		TRUE	-0.663662	0.000287657	0.00529703	Chromosome_I	814926	815735	810	+	10.7946	1803.96	1810.4	1850.12	1445.21	1789.43	1677.38	1174.57	1310.5	1218.21	2570.94	2953.39	2880.78	2291.85	2093.34	2252.85	1215.2	1463.32	1211.86	1825.63	1885.99	1988.89	91.7698	92.3701	95.3359	96.1194	114.229	101.363	69.044	70.3055
pgaptmp_004197	pgaptmp_004197	pgaptmp_004197	protein_coding	protein_coding	pgaptmp_004197	0.4439	1926				TRUE	0.731998	0.000288286	0.00529703	Chromosome_II	1042796	1044721	1926	+	7.73256	201.982	219.149	232.797	330.554	325.662	397.49	443.247	367.925	404.662	167.494	145.13	135.239	163.493	125.423	130.428	131.464	133.151	120.392	243.641	237.66	219.326	4.3213	4.70246	5.04501	9.24593	8.74288	10.1019	10.9578	8.30119
pgaptmp_002010	pgaptmp_002010	pgaptmp_002010	protein_coding	protein_coding	pgaptmp_002010	0.4398	855	GO:0030001,GO:0055085		GO:0043190	TRUE	-0.693397	0.000288636	0.00529703	Chromosome_I	2176488	2177342	855	-	7.95099	250.55	315.082	358.589	305.57	296.987	283.686	241.299	247.771	221.684	171.53	230.393	192.669	159.075	148.731	180.491	195.511	206.383	251.368	370.491	402.683	353.082	12.075	15.23	17.5054	19.2535	17.9604	16.2407	13.4376	12.5928
pgaptmp_003272	pgaptmp_003272	pgaptmp_003272	protein_coding	protein_coding	pgaptmp_003272	0.4726	1350	GO:0030245	GO:0008422		TRUE	0.715062	0.000291004	0.00532194	Chromosome_II	6007	7356	1350	-	6.16003	57.0483	60.7281	74.3316	77.5136	88.0721	73.3955	116.566	111.198	108.379	54.4861	54.4236	61.1355	54.4978	58.8266	89.5869	53.9339	63.9123	78.0564	67.0572	62.4414	60.647	1.74127	1.85908	2.29816	3.0932	3.37325	2.66114	4.11121	3.57933
pgaptmp_004419	pgaptmp_004419	pgaptmp_004419	protein_coding	protein_coding	pgaptmp_004419	0.4399	741	GO:0033214	GO:0008199,GO:0016491,GO:0051537		TRUE	-0.786101	0.000292907	0.00533821	Chromosome_II	1288720	1289460	741	-	7.55065	127.973	117.056	115.99	232.541	217.108	216.063	161.856	138.811	166.791	244.178	192.297	168.586	120.779	207.558	162.047	229.219	211.709	234.169	259.847	239.571	297.42	7.11638	6.52853	6.53346	16.9062	15.1496	14.2723	10.4002	8.14037
pgaptmp_004813	pgaptmp_004813	mngA	protein_coding	protein_coding	pgaptmp_004813	0.4972	1935	GO:0009401	GO:0005351,GO:0022877	GO:0016020	TRUE	0.889322	0.000293961	0.00533894	Chromosome_II	1738695	1740629	1935	+	7.1247	249.779	278.997	282.623	297.883	268.995	188.849	435.08	464.944	413.107	40.3601	34.4683	42.6096	47.1332	51.0571	51.3807	80.9009	62.5808	84.6713	181.613	239.571	258.373	5.31904	5.95882	6.09633	8.29333	7.188	4.77713	10.7058	10.4414
pgaptmp_001176	pgaptmp_001176	pgaptmp_001176	protein_coding	protein_coding	pgaptmp_001176	0.4206	573				TRUE	-0.783821	0.000300123	0.0054295	Chromosome_I	1252982	1253554	573	-	10.1414	839.535	1032.38	1101.09	1128.75	1196.82	1608.93	889.464	826.152	798.767	1313.72	1101.17	1118.96	1038.4	932.347	986.773	1400.6	1326.18	1326.96	1560.76	1378.17	1266.94	60.3729	74.4604	80.2063	106.123	107.999	137.441	73.9105	62.6531
pgaptmp_001169	pgaptmp_001169	pgaptmp_001169	protein_coding	protein_coding	pgaptmp_001169	0.4641	711				TRUE	-1.19811	0.000301009	0.0054295	Chromosome_I	1246989	1247699	711	+	10.3439	809.469	945.246	1065.15	1046.11	985.861	1678.2	804.081	632.861	567.934	1818.22	1794.17	1771.08	1294.69	1446.25	1735.09	2290.51	2204.97	1948.76	1809.43	1422.14	1245.34	46.9125	54.9435	62.5289	79.2636	71.6952	115.533	53.8472	38.6791
pgaptmp_003048	pgaptmp_003048	pgaptmp_003048	protein_coding	protein_coding	pgaptmp_003048	0.313	687				TRUE	-0.814035	0.000307906	0.00548088	Chromosome_I	3301085	3301771	687	-	11.6371	3096.8	3293.4	2726.58	3164.61	3129.63	2687.6	2352.85	2188.15	2587.02	3148.09	3299.89	3297.61	2848.62	2673.84	2632.27	5024.28	4087.72	3988.81	4413.48	3618.42	4120.68	185.744	198.12	165.654	248.157	235.549	191.487	163.068	138.407
pgaptmp_000232	pgaptmp_000232	pgaptmp_000232	protein_coding	protein_coding	pgaptmp_000232	0.4562	1416	GO:0006820	GO:0008509	GO:0016020	TRUE	0.749742	0.000309858	0.00548088	Chromosome_I	251546	252961	1416	-	9.83308	2454.62	2366.63	2500.32	1475.96	1446.02	1426.68	2169.46	2120.98	2181.65	290.593	361.01	320.498	371.174	391.808	329.363	460.124	455.375	497.444	1113.71	1406.84	1202.97	71.4297	69.0732	73.701	56.1534	52.8026	49.3168	72.9493	65.0894
pgaptmp_003680	pgaptmp_003680	pgaptmp_003680	protein_coding	protein_coding	pgaptmp_003680	0.4752	444	GO:0008643,GO:0009401,GO:0016310	GO:0016301	GO:1902495	TRUE	0.722888	0.000310325	0.00548088	Chromosome_II	436563	437006	444	-	8.5705	2049.88	2082.36	1739.03	893.008	747.589	952.492	1253.27	1320.2	1294.21	46.4141	145.13	68.5459	73.6457	61.0465	52.6982	106.182	133.151	201.094	653.249	797.721	814.997	190.241	193.827	163.48	108.352	87.061	105.005	134.398	129.21
pgaptmp_003660	pgaptmp_003660	pgaptmp_003660	protein_coding	protein_coding	pgaptmp_003660	0.3932	234				TRUE	0.717244	0.000311563	0.00548088	Chromosome_II	416914	417147	234	+	6.87835	132.599	141.699	120.074	162.715	189.116	186.375	200.463	209.71	208.313	46.4141	78.0072	55.5777	148.764	59.9366	80.3647	85.9572	85.2164	125.684	124.056	125.52	106.34	23.3497	25.026	21.4178	37.4606	41.7885	38.9857	40.7899	38.944
pgaptmp_001017	pgaptmp_001017	pgaptmp_001017	protein_coding	protein_coding	pgaptmp_001017	0.4476	630				TRUE	-0.919144	0.000311891	0.00548088	Chromosome_I	1078213	1078842	630	+	11.3458	2190.96	2531.22	2604.87	2147.96	2058.43	2770.89	2011.32	1567.97	1728.43	2932.16	2824.59	2771.48	2894.28	3021.25	3084.16	2951.2	3131.7	2819.29	3597.62	3261.61	2875.33	143.302	166.047	172.579	183.675	168.943	215.284	152.01	108.152
pgaptmp_004552	pgaptmp_004552	pgaptmp_004552	protein_coding	protein_coding	pgaptmp_004552	0.445	1290				TRUE	0.61969	0.000312343	0.00548088	Chromosome_II	1436598	1437887	1290	-	8.84155	578.963	645.126	608.539	566.939	585.099	530.262	665.242	655.996	707.278	347.097	458.973	405.717	357.918	336.311	339.903	335.402	324.887	275.182	397.314	434.541	441.145	18.4935	20.6679	19.6897	23.6761	23.4522	20.1203	24.554	22.0978
pgaptmp_004151	pgaptmp_004151	pgaptmp_004151	protein_coding	protein_coding	pgaptmp_004151	0.4343	2001				TRUE	-0.894164	0.000312458	0.00548088	Chromosome_II	987039	989039	2001	+	6.87261	67.8412	84.4912	78.4158	158.23	148.152	124.525	152.946	129.856	182.977	102.918	96.1484	68.5459	86.9019	89.9048	75.0949	77.53	103.857	64.8265	274.376	266.332	316.528	1.39703	1.74504	1.63568	4.25997	3.82829	3.04609	3.63935	2.82002
pgaptmp_003907	pgaptmp_003907	malK	protein_coding	protein_coding	pgaptmp_003907	0.4531	1119	GO:0008643,GO:0055085	GO:0005524,GO:0140359	GO:0043190	TRUE	0.69784	0.000313068	0.00548088	Chromosome_II	676824	677942	1119	-	10.3184	1788.54	1756.71	1332.25	2262.63	1798.99	2156.51	3058.18	2901.61	2873.45	645.761	731.091	691.016	475.751	485.042	515.124	916.877	744.312	1243.61	1777.02	1856.04	1634.98	65.8608	64.8802	49.6932	108.93	83.1272	94.3309	130.127	112.68
pgaptmp_000320	pgaptmp_000320	aroK	protein_coding	protein_coding	pgaptmp_000320	0.4586	519				TRUE	-1.26071	0.000314814	0.00548088	Chromosome_I	339329	339847	519	+	14.3011	13627.6	15432	17949.9	19423.3	17557.8	27626.4	13494.2	11080.3	11527.6	22155.7	26700.2	26653.2	22173.2	24379.8	25353.1	21147.2	24280	18087.9	35223.5	24774	23699.7	1081.96	1228.84	1443.56	2016.13	1749.22	2605.49	1237.97	927.729
pgaptmp_003369	pgaptmp_003369	pgaptmp_003369	protein_coding	protein_coding	pgaptmp_003369	0.4917	1023	GO:0007165	GO:0000155,GO:0004673,GO:0005524		TRUE	1.35481	0.000315199	0.00548088	Chromosome_II	105026	106048	1023	-	7.67988	127.202	103.854	105.371	80.7167	121.526	111.33	190.812	247.771	173.829	189.692	214.066	144.502	810.103	664.852	657.409	554.508	593.852	985.627	50.2929	86.6534	83.9089	5.12363	4.19554	4.29919	4.25062	6.14238	5.32685	8.881	10.5248
pgaptmp_000361	pgaptmp_000361	pgaptmp_000361	protein_coding	protein_coding	pgaptmp_000361	0.4963	540				TRUE	-0.835538	0.000315304	0.00548088	Chromosome_I	389454	389993	540	+	12.7075	5677.85	4896.09	7753.36	7455.4	5152.56	6530.55	5200.17	4241.21	5038.21	8358.57	8299.61	8103.23	6081.66	8997.14	9040.37	4490	7909.15	6224.66	7810.49	8163.26	9100.38	433.259	374.712	599.29	743.775	493.37	591.955	458.518	341.298
pgaptmp_002408	pgaptmp_002408	pgaptmp_002408	protein_coding	protein_coding	pgaptmp_002408	0.4667	855				TRUE	-0.717821	0.000317577	0.00550224	Chromosome_I	2619545	2620399	855	-	10.3232	952.09	843.152	971.212	657.264	811.765	877.447	602.133	600.77	535.561	3696.98	3842.31	3764.46	2318.37	2601.69	2435.97	1493.3	1609.79	1678.87	984.065	844.871	955.399	45.8849	40.755	47.4121	41.4131	49.0917	50.2328	33.532	30.5337
pgaptmp_003595	pgaptmp_003595	pgaptmp_003595	protein_coding	protein_coding	pgaptmp_003595	0.4399	666	GO:0000160,GO:0006355	GO:0000156,GO:0003677		TRUE	-0.789763	0.000319527	0.00551787	Chromosome_II	345716	346381	666	+	8.96157	245.924	265.795	229.529	532.346	529.798	619.326	392.017	329.864	348.361	728.499	714.764	618.765	483.116	608.245	533.569	746.648	633.797	702.507	648.22	528.203	631.394	15.2155	16.4936	14.3848	43.061	41.132	45.5175	28.0262	21.5227
pgaptmp_005221	pgaptmp_005221	pgaptmp_005221	protein_coding	protein_coding	pgaptmp_005221	0.4475	324				TRUE	-1.10891	0.000320807	0.00552186	Chromosome_II	2191967	2192290	324	+	8.89769	254.405	329.164	300.594	749.512	751.685	705.916	443.247	372.403	355.399	365.259	386.408	272.331	287.218	414.006	408.411	726.423	605.835	657.526	1024.86	688.767	753.519	32.3547	41.9864	38.7236	124.623	119.96	106.645	65.1379	49.9465
pgaptmp_004899	pgaptmp_004899	pgaptmp_004899	protein_coding	protein_coding	pgaptmp_004899	0.4606	1407				TRUE	0.882683	0.000326335	0.00558415	Chromosome_II	1833673	1835079	1407	-	8.49229	413.986	405.734	410.049	701.466	686.826	437.899	596.193	735.85	753.726	290.593	261.234	235.279	282.799	251.956	243.729	168.544	219.698	175.958	309.022	408.418	370.529	12.1241	11.9176	12.1642	26.8582	25.2404	15.234	20.1756	22.7265
pgaptmp_004279	pgaptmp_004279	pgaptmp_004279	protein_coding	protein_coding	pgaptmp_004279	0.413	828				TRUE	0.877842	0.000327553	0.00558415	Chromosome_II	1131000	1131827	828	+	7.83748	530.395	745.459	720.445	456.113	487.469	515.418	617.724	618.681	629.865	94.8462	112.476	85.2192	75.1186	78.8055	93.5392	45.5068	55.9232	91.2862	365.462	342.153	265.019	26.3953	37.2079	36.3171	29.6761	30.4411	30.4693	35.522	32.4694
pgaptmp_002817	pgaptmp_002817	pgaptmp_002817	protein_coding	protein_coding	pgaptmp_002817	0.4644	954				TRUE	-0.658584	0.00032913	0.00558415	Chromosome_I	3059290	3060243	954	+	10.7813	1564.2	1487.4	1584.65	1541.94	1707.51	1241.95	998.605	1141.84	1080.97	2209.71	2100.75	2098.99	2533.41	2703.8	2736.35	2256.8	2234.27	2313.91	1675.31	1608.82	1655.75	67.562	64.4348	69.3308	87.0732	92.546	63.7219	49.84	52.0107
pgaptmp_004404	pgaptmp_004404	pgaptmp_004404	protein_coding	protein_coding	pgaptmp_004404	0.4684	1014				TRUE	0.747404	0.000329547	0.00558415	Chromosome_II	1270627	1271640	1014	-	5.52259	39.3171	32.5643	34.3069	41.6396	45.0601	44.5321	54.1994	58.9575	58.412	30.2701	52.6095	40.757	54.4978	46.6173	63.2378	65.732	73.2328	52.9196	28.4993	29.3092	33.2313	1.59772	1.32723	1.41216	2.21224	2.29773	2.14965	2.54501	2.52661
pgaptmp_000010	pgaptmp_000010	pgaptmp_000010	protein_coding	protein_coding	pgaptmp_000010	0.4631	555				TRUE	-1.03898	0.000330128	0.00558415	Chromosome_I	14514	15068	555	+	10.1702	635.24	812.348	895.247	1131.31	1127.87	1553.68	639.256	560.47	555.97	1382.33	1545.63	1430.2	1374.23	1158.77	1179.12	2384.89	2396.71	2089	1383.06	1203.59	923.829	47.1632	60.491	67.3272	109.813	105.077	137.025	54.8421	43.883
pgaptmp_002879	pgaptmp_002879	folK	protein_coding	protein_coding	pgaptmp_002879	0.441	483	GO:0009396	GO:0003848		TRUE	-0.691724	0.000330787	0.00558415	Chromosome_I	3132138	3132620	483	-	9.78644	883.477	829.07	851.138	1014.08	1060.28	927.752	622.922	591.814	724.872	1061.47	999.581	870.718	1006	1061.1	963.059	765.188	757.627	747.489	999.153	1023.91	1025.18	75.3714	70.9391	73.5519	113.107	113.505	94.0194	61.4072	53.2446
pgaptmp_002303	pgaptmp_002303	pgaptmp_002303	protein_coding	protein_coding	pgaptmp_002303	0.4707	735				TRUE	-1.01005	0.000334055	0.00560534	Chromosome_I	2503724	2504458	735	-	10.0985	824.116	995.412	1031.66	1087.11	1059.6	1546.25	836.749	664.205	653.793	1156.32	1371.48	1391.3	1044.3	978.964	980.186	1215.2	1282.24	1319.02	1662.46	1228.44	1330.91	46.2019	55.9702	58.5854	79.6804	74.5413	102.974	54.2052	39.2692
pgaptmp_005189	pgaptmp_005189	pgaptmp_005189	protein_coding	protein_coding	pgaptmp_005189	0.4412	306				TRUE	-0.980801	0.000334171	0.00560534	Chromosome_II	2159643	2159948	306	-	7.87456	135.682	135.538	120.074	157.59	195.261	142.668	109.884	140.304	137.937	324.899	283.003	301.972	484.589	482.822	463.744	323.604	475.348	357.207	242.524	214.722	306.558	18.2709	18.3055	16.3783	27.7441	32.9942	22.8211	17.098	19.9244
pgaptmp_001018	pgaptmp_001018	pgaptmp_001018	protein_coding	protein_coding	pgaptmp_001018	0.4789	1326				TRUE	-0.701409	0.000335647	0.00560946	Chromosome_I	1078932	1080257	1326	-	12.4121	3963.31	3748.42	4295.71	3591.89	4030.15	3480.93	2790.15	2967.28	2760.85	10011.3	11122.4	11069.2	9881.78	9905.07	10745.2	6895.12	7516.35	6567.32	4303.96	4270.23	4873.36	123.161	116.828	135.217	145.93	157.153	128.494	100.188	97.2417
pgaptmp_004670	pgaptmp_004670	pgaptmp_004670	protein_coding	protein_coding	pgaptmp_004670	0.4224	909				TRUE	-0.913612	0.000336547	0.00560946	Chromosome_II	1584619	1585527	909	-	8.38504	227.422	247.313	292.425	698.904	703.211	774.364	438.792	370.164	396.92	314.809	228.579	226.016	178.223	167.6	189.713	241.017	159.781	168.02	863.362	720.625	631.394	10.3093	11.2441	13.4274	41.4207	40.0005	41.6979	22.9841	17.6957
pgaptmp_001225	pgaptmp_001225	pgaptmp_001225	protein_coding	protein_coding	pgaptmp_001225	0.4592	1263				TRUE	-1.05866	0.000339889	0.00564506	Chromosome_I	1306722	1307984	1263	+	12.3856	4684.9	3665.69	4106.21	6622.61	7000.02	4604.12	3259.39	3842.69	3934.02	9262.64	9213.92	8551.56	4781.08	5446.46	4533.36	4213.59	4034.46	4604	6117.29	6988.98	9239.12	152.846	119.948	135.7	282.482	286.576	178.434	122.876	132.211
pgaptmp_004424	pgaptmp_004424	pgaptmp_004424	protein_coding	protein_coding	pgaptmp_004424	0.4641	849	GO:0015724	GO:0015499	GO:0005886	TRUE	0.961101	0.000340826	0.00564506	Chromosome_II	1294128	1294976	849	-	10.7855	4433.58	6311.32	7308.19	8491.91	9365.68	12266.1	11157.6	11027.3	9630.25	274.448	366.453	298.267	251.868	156.501	187.078	291.58	227.688	293.704	5143.29	6121.17	4560.99	215.181	307.223	359.288	538.842	570.395	707.184	625.745	564.415
pgaptmp_000488	pgaptmp_000488	pgaptmp_000488	protein_coding	protein_coding	pgaptmp_000488	0.4181	177				TRUE	1.78396	0.000345445	0.00570188	Chromosome_I	510152	510328	177	+	7.03762	2760.67	1813.92	1636.93	94.8101	88.7548	46.1814	81.6703	133.587	182.274	155.386	197.739	185.259	119.306	105.444	90.9043	53.9339	53.2602	62.1805	22.9112	33.1322	42.3699	642.688	423.532	386.009	28.8566	25.9276	12.7711	21.9697	32.7966
pgaptmp_003972	pgaptmp_003972	codB	protein_coding	protein_coding	pgaptmp_003972	0.4722	1239	GO:0055085	GO:0015209	GO:0016020	TRUE	-0.866519	0.000346631	0.00570188	Chromosome_II	737789	739027	1239	-	8.04651	149.559	133.778	117.624	194.745	245.783	175.654	118.793	138.065	170.31	488.357	409.991	414.98	497.845	641.543	648.187	348.885	374.153	318.84	245.876	268.243	257.542	4.97393	4.46225	3.96245	8.46758	10.2571	6.93938	4.56513	4.84228
pgaptmp_004913	pgaptmp_004913	pgaptmp_004913	protein_coding	protein_coding	pgaptmp_004913	0.4155	426				TRUE	1.06405	0.000347504	0.00570188	Chromosome_II	1848598	1849023	426	+	9.54803	1314.42	1552.53	1573.22	1628.43	1182.49	1898.39	3305.42	2238.15	2465.27	242.16	239.464	224.164	192.952	224.207	142.285	576.419	338.202	353.238	1312.65	1295.98	1089.99	127.14	150.616	154.142	205.932	143.526	218.126	369.445	228.306
pgaptmp_002874	pgaptmp_002874	pgaptmp_002874	protein_coding	protein_coding	pgaptmp_002874	0.4493	612				TRUE	-0.852241	0.000352091	0.00575921	Chromosome_I	3126799	3127410	612	+	11.6555	2688.98	3007.36	2962.65	3160.76	3008.79	3464.43	2316.47	2087.4	2229.51	4869.44	4531.68	4570.34	3364.13	3930.28	3958.95	2587.14	2921.32	2470.02	4482.22	3584.01	3540.79	181.048	203.084	202.055	278.23	254.205	277.085	180.222	148.214
pgaptmp_000734	pgaptmp_000734	galE	protein_coding	protein_coding	pgaptmp_000734	0.5078	1020	GO:0006012	GO:0003978		TRUE	1.11603	0.00035493	0.00576365	Chromosome_I	767167	768186	1020	+	6.50595	204.295	123.216	123.341	83.9197	61.4456	49.4801	155.916	192.545	198.46	50.4501	68.9366	62.9881	92.7936	78.8055	97.4916	52.2485	79.8904	75.4104	56.9986	84.7419	93.0475	8.25306	4.99241	5.04719	4.43229	3.11483	2.37445	7.27819	8.20293
pgaptmp_001782	pgaptmp_001782	pgaptmp_001782	protein_coding	protein_coding	pgaptmp_001782	0.4182	1968	GO:0009966	GO:0009975		TRUE	-0.697165	0.000355341	0.00576365	Chromosome_I	1900613	1902580	1968	+	10.4766	1651.32	1651.98	1707.18	1787.3	1644.01	1296.38	963.71	929.887	1012.01	1624.49	1416.83	1591.38	1229.88	1546.14	1396.5	1710.72	1428.71	1239.64	1660.78	1402.38	1512.02	34.5751	34.6913	36.2071	48.9256	43.194	32.2433	23.316	20.5325
pgaptmp_001847	pgaptmp_001847	pgaptmp_001847	protein_coding	protein_coding	pgaptmp_001847	0.4204	402				TRUE	0.936152	0.000355646	0.00576365	Chromosome_I	1977180	1977581	402	-	6.97112	213.546	245.553	294.876	219.088	228.714	286.985	326.681	264.189	266.725	56.5041	76.1931	57.4303	48.6062	59.9366	35.5713	72.4737	75.8958	47.6276	155.908	150.369	117.14	21.8888	25.2441	30.6164	29.3601	29.4179	34.9434	38.6929	28.5579
pgaptmp_005024	pgaptmp_005024	pgaptmp_005024	protein_coding	protein_coding	pgaptmp_005024	0.4578	1470				TRUE	0.93151	0.000362899	0.00586315	Chromosome_II	1980843	1982312	1470	+	13.1531	6960.66	6908.04	5480.93	8071.67	8573.72	10048.6	13600.3	14408	11196.1	7119.52	6904.55	7673.43	9170.36	7378.86	7185.39	16817.3	11371.1	34311.7	5969.77	7219.63	6745.11	195.115	194.213	155.625	295.808	301.575	334.596	440.519	425.917
pgaptmp_005048	pgaptmp_005048	pgaptmp_005048	protein_coding	protein_coding	pgaptmp_005048	0.487	1692				TRUE	0.688676	0.000366202	0.00589843	Chromosome_II	2011116	2012807	1692	+	7.54933	133.37	167.222	185.421	198.589	215.06	239.979	279.906	305.236	269.54	106.954	154.2	142.65	157.602	156.501	160.729	197.196	210.378	261.952	169.878	179.678	156.187	3.24799	4.08447	4.57403	6.32293	6.57208	6.94232	7.87672	7.83921
pgaptmp_001344	pgaptmp_001344	pgaptmp_001344	protein_coding	protein_coding	pgaptmp_001344	0.3333	144				TRUE	0.740985	0.000368524	0.00591774	Chromosome_I	1417268	1417411	144	+	7.02929	144.163	121.456	134.777	137.09	124.939	123.7	174.477	152.991	149.197	123.098	128.803	135.239	148.764	175.37	105.396	208.994	145.134	91.2862	84.9391	84.1048	99.6938	41.2523	34.8577	39.0656	51.2871	44.8623	42.0476	57.6912	46.168
pgaptmp_003360	pgaptmp_003360	pgaptmp_003360	protein_coding	protein_coding	pgaptmp_003360	0.5183	519				TRUE	-0.90695	0.000377478	0.0060431	Chromosome_II	96227	96745	519	+	8.65012	164.977	237.632	214.01	492.628	445.822	557.476	320.742	250.01	244.908	407.637	535.166	474.263	397.687	342.97	400.506	689.343	695.046	676.047	542.605	433.267	524.223	13.0983	18.9225	17.211	51.1347	44.4159	52.5765	29.4253	20.9328
pgaptmp_004950	pgaptmp_004950	yghU	protein_coding	protein_coding	pgaptmp_004950	0.4971	861	GO:0006749	GO:0005515		TRUE	1.31864	0.000381979	0.00609661	Chromosome_II	1882520	1883380	861	-	10.1993	1167.18	957.567	879.727	855.853	847.95	663.034	1461.16	1653.8	1479.3	1333.9	1057.63	1157.87	2297.75	2027.85	2132.96	1616.33	1999.92	1768.84	385.02	668.378	726.103	55.8588	45.9629	42.6467	53.5501	50.9226	37.6934	80.8028	83.4673
pgaptmp_000245	pgaptmp_000245	pgaptmp_000245	protein_coding	protein_coding		0.5	1000				TRUE	-1.12685	0.000388215	0.00617743	pgaptmp_000245	1	1000	1000	+	10.5677	565.857	667.129	810.296	682.248	786.504	1067.12	645.195	564.201	487.002	3361.99	4444.6	4814.88	2635.04	2366.38	2873.37	5513.06	3994.52	4277.22	1504.88	1013.08	1090.82	23.3166	27.5709	33.8209	36.7542	40.6673	52.2332	30.7202	24.5172
pgaptmp_002909	pgaptmp_002909	calR	protein_coding	protein_coding	pgaptmp_002909	0.4552	960				TRUE	1.01715	0.000392951	0.00621729	Chromosome_I	3165980	3166939	960	-	13.9848	33683.9	43427.6	44181.6	35672.9	30734.4	32642.9	50943	47376.5	43822.4	4364.94	4814.68	5020.52	6877.03	6964.85	7011.49	6814.22	6677.5	5645.19	25600.8	22750.3	19630.5	1445.8	1869.55	1920.93	2001.85	1655.38	1664.37	2526.65	2144.51
pgaptmp_005030	pgaptmp_005030	pgaptmp_005030	protein_coding	protein_coding	pgaptmp_005030	0.4481	549			GO:0016020	TRUE	-0.869039	0.000393081	0.00621729	Chromosome_II	1988446	1988994	549	+	10.6836	541.188	504.307	561.98	769.371	911.444	1348.33	706.077	614.949	572.156	5254.88	5950.32	5924.59	3437.78	3096.72	3596.65	5464.18	4637.64	3769.2	1198.09	941.719	1229.56	40.6194	37.9633	42.7257	75.4966	85.8423	120.215	61.2368	48.6748
pgaptmp_002562	pgaptmp_002562	rlmH	protein_coding	protein_coding	pgaptmp_002562	0.4904	471	GO:0006364	GO:0008168		TRUE	-0.687161	0.000394715	0.00622444	Chromosome_I	2765205	2765675	471	+	10.5721	1133.26	1055.26	1089.65	946.179	1149.72	1084.44	724.638	844.063	700.944	2869.6	3238.21	3599.58	3227.15	2712.68	3045.95	1774.76	1962.64	1967.28	1189.71	1189.57	1175.56	99.1438	92.5934	96.5624	108.222	126.216	112.698	73.2543	77.8738
pgaptmp_003814	pgaptmp_003814	pgaptmp_003814	protein_coding	protein_coding	pgaptmp_003814	0.4505	657	GO:0006355	GO:0003677,GO:0003700		TRUE	0.867742	0.000401103	0.00630629	Chromosome_II	573513	574169	657	-	5.80234	66.2994	71.2895	81.6831	106.341	92.1685	92.3629	147.007	112.691	116.824	24.216	41.7248	33.3466	29.4583	42.1776	35.5713	23.5961	25.2986	19.8448	60.3515	58.6185	72.278	4.15817	4.48437	5.18929	8.71966	7.25372	6.88121	10.6538	7.45352
pgaptmp_002904	pgaptmp_002904	pgaptmp_002904	protein_coding	protein_coding	pgaptmp_002904	0.441	678		GO:0003700		TRUE	-0.635559	0.000406007	0.00636441	Chromosome_I	3158439	3159116	678	+	8.93809	496.474	560.634	606.088	538.752	507.268	470.061	365.289	326.132	323.729	528.717	604.102	657.67	570.018	561.628	554.648	423.044	442.06	387.636	531.987	501.443	505.946	30.1735	34.1737	37.3119	42.8078	38.6858	33.9357	25.6531	20.9027
pgaptmp_003568	pgaptmp_003568	pgaptmp_003568	protein_coding	protein_coding	pgaptmp_003568	0.4731	1095				TRUE	1.46611	0.000409884	0.00640112	Chromosome_II	320073	321167	1095	+	9.36469	4207.7	3365.57	3476.43	4102.46	4247.94	2509.47	5803.79	8683.92	8039.75	64.5761	32.6542	42.6096	76.5915	72.1459	81.6821	47.1922	69.2383	70.1184	1796.57	2772.91	3343.9	158.339	127.024	132.514	201.834	200.59	112.176	252.366	344.619
pgaptmp_001988	pgaptmp_001988	pgaptmp_001988	protein_coding	protein_coding	pgaptmp_001988	0.4574	693	GO:0001522	GO:0004730		TRUE	-0.763819	0.000410791	0.00640112	Chromosome_I	2150603	2151295	693	-	8.83697	447.135	382.851	480.297	363.225	415.099	362.854	294.756	306.728	280.8	639.707	738.347	726.216	528.776	502.801	603.394	465.18	458.038	453.785	420.225	479.142	569.916	26.5867	22.8317	28.9279	28.2362	30.9715	25.629	20.2517	19.2335
pgaptmp_004786	pgaptmp_004786	pgaptmp_004786	protein_coding	protein_coding	pgaptmp_004786	0.4634	1092		GO:0015288	GO:0009279	TRUE	0.69285	0.000411995	0.00640112	Chromosome_II	1710463	1711554	1092	-	7.8914	178.083	211.228	204.208	545.158	594.657	519.541	469.233	483.601	475.741	129.152	134.245	172.291	166.439	139.852	175.221	114.61	111.846	142.883	291.14	306.473	250.065	6.71983	7.99412	7.80531	26.8945	28.1571	23.2879	20.4597	19.2443
pgaptmp_004669	pgaptmp_004669	vctD	protein_coding	protein_coding	pgaptmp_004669	0.4583	936				TRUE	-0.937146	0.000416463	0.00645151	Chromosome_II	1583661	1584596	936	-	7.55714	72.4667	103.854	102.104	372.194	420.561	504.697	191.554	160.454	146.382	161.44	156.014	181.554	162.021	144.292	114.618	188.769	139.808	195.802	364.903	302.65	274.158	3.19022	4.58552	4.5531	21.4219	23.2326	26.3929	9.74424	7.44924
pgaptmp_000194	pgaptmp_000194	pgaptmp_000194	protein_coding	protein_coding	pgaptmp_000194	0.4769	627				TRUE	-0.845784	0.000424	0.00654899	Chromosome_I	211108	211734	627	-	8.22739	249.779	259.634	309.579	541.955	432.85	475.834	252.435	282.847	289.245	137.224	114.29	140.797	284.272	369.609	384.697	254.501	266.301	306.933	421.902	579.813	451.114	16.4152	17.1134	20.6084	46.565	35.6956	37.1467	19.1697	19.6029
pgaptmp_002654	pgaptmp_002654	pgaptmp_002654	protein_coding	protein_coding	pgaptmp_002654	0.4905	1368			GO:0016020	TRUE	-0.668605	0.000428348	0.00658335	Chromosome_I	2872758	2874125	1368	+	10.5111	608.258	718.175	742.499	1016.01	1000.88	1204.02	803.339	749.283	674.905	2819.15	3084.01	3418.03	2135.72	1828.07	2313.45	3830.99	3425.96	3204.28	1178.53	1147.52	1117.4	18.3215	21.6963	22.6543	40.0105	37.8304	43.0803	27.9605	23.8011
pgaptmp_001574	pgaptmp_001574	pgaptmp_001574	protein_coding	protein_coding	pgaptmp_001574	0.4722	1404	GO:0055085	GO:0015297,GO:0042910	GO:0016020	TRUE	-0.6181	0.000428724	0.00658335	Chromosome_I	1637421	1638824	1404	-	8.61788	444.051	405.734	379.826	311.336	374.818	385.12	272.482	240.308	269.54	637.689	660.34	772.53	337.297	433.985	512.49	343.829	355.512	293.704	402.343	382.294	389.637	13.0324	11.9431	11.2917	11.9461	13.8038	13.4265	9.24066	7.4377
pgaptmp_001734	pgaptmp_001734	pgaptmp_001734	protein_coding	protein_coding	pgaptmp_001734	0.4649	699	GO:0055085		GO:0016020	TRUE	0.914485	0.000430994	0.00659898	Chromosome_I	1834451	1835149	699	+	9.78855	1264.31	1123.03	1114.16	696.982	979.717	597.885	824.128	1038.85	995.116	1576.06	2004.6	1622.87	1029.57	731.448	778.615	846.089	730.997	642.973	405.137	476.594	581.547	74.5308	66.3981	66.5289	53.7166	72.4715	41.8671	56.1371	64.582
pgaptmp_002913	pgaptmp_002913	leuA	protein_coding	protein_coding	pgaptmp_002913	0.48	1548	GO:0019752	GO:0003852		TRUE	1.0064	0.000432518	0.00660312	Chromosome_I	3170610	3172157	1548	+	9.8383	1544.16	1318.42	1129.68	607.297	741.444	473.36	999.348	1292.59	1201.32	774.913	859.894	746.594	1260.81	1530.6	1486.09	869.685	1034.58	931.384	440.901	563.884	674.595	41.1035	35.1984	30.4596	21.1346	24.7657	14.9676	30.7382	36.285
pgaptmp_004782	pgaptmp_004782	pgaptmp_004782	protein_coding	protein_coding	pgaptmp_004782	0.4734	828				TRUE	0.58765	0.000437987	0.00666701	Chromosome_II	1707685	1708512	828	+	7.32776	111.013	121.456	129.876	165.918	187.751	156.687	193.781	194.784	199.868	135.206	136.059	201.932	191.479	247.516	230.554	165.173	129.156	171.989	122.938	121.06	128.771	5.5246	6.06221	6.54696	10.7951	11.7245	9.26266	11.1433	10.2226
pgaptmp_003192	pgaptmp_003192	pgaptmp_003192	protein_coding	protein_coding		0.5	1000				TRUE	-1.2892	0.000439236	0.00666701	pgaptmp_003192	1	1000	1000	+	13.7423	3163.87	4185.84	4058.83	7713.57	8378.46	12144.1	5004.16	4309.12	3105.69	33319.3	68831.4	59164.3	30548.2	25246.6	25060.6	66591.6	42977	38418.3	11446.1	9872.12	8098.46	130.37	172.991	169.411	415.546	433.219	594.425	238.267	187.252
pgaptmp_004622	pgaptmp_004622	pgaptmp_004622	protein_coding	protein_coding	pgaptmp_004622	0.4091	660				TRUE	0.635608	0.000446495	0.00674144	Chromosome_II	1528618	1529277	660	-	8.41263	312.995	351.167	325.099	332.476	329.076	277.089	334.106	354.491	379.326	419.745	391.85	398.307	446.293	447.304	334.633	423.044	402.115	373.083	226.318	203.253	229.296	19.5412	21.9893	20.5595	27.1382	25.7808	20.5498	24.1031	23.3399
pgaptmp_004873	pgaptmp_004873	pgaptmp_004873	protein_coding	protein_coding	pgaptmp_004873	0.5024	414				TRUE	-0.890213	0.000446699	0.00674144	Chromosome_II	1803311	1803724	414	+	6.43401	100.991	117.056	67.797	146.699	128.353	98.9602	148.491	117.169	104.156	68.6121	45.353	42.6096	51.552	66.5962	64.5552	28.6524	39.9452	33.0747	232.465	207.076	242.588	10.0517	11.6851	6.83519	19.0894	16.0306	11.7002	17.0779	12.2984
pgaptmp_000305	pgaptmp_000305	argE	protein_coding	protein_coding	pgaptmp_000305	0.4679	1137	GO:0006526	GO:0019213		TRUE	1.07174	0.000451283	0.00678457	Chromosome_I	321020	322156	1137	-	11.4261	4626.31	4605.65	5223.63	3634.81	3822.6	2512.77	4580.22	5055.42	4960.8	1172.46	1384.17	1230.12	1863.24	1772.57	2176.43	2748.95	2894.69	3127.55	1635.64	2677.34	2419.24	167.661	167.406	191.758	172.221	173.837	108.174	191.804	193.212
pgaptmp_000613	pgaptmp_000613	nadC	protein_coding	protein_coding	pgaptmp_000613	0.4662	888	GO:0009435	GO:0004514		TRUE	-0.698231	0.000452133	0.00678457	Chromosome_I	617116	618003	888	-	11.2337	2160.13	2688.76	2671.04	2663.65	2552.73	2643.06	2159.81	1830.67	1883.26	1987.73	2106.2	2232.37	1911.84	2237.63	2297.64	2811.31	2513.88	2606.29	3201.42	3063.45	2981.67	100.236	125.135	125.547	161.595	148.64	145.689	115.807	89.5848
pgaptmp_000637	pgaptmp_000637	pgaptmp_000637	protein_coding	protein_coding	pgaptmp_000637	0.4173	369				TRUE	-1.07908	0.000457098	0.00683959	Chromosome_I	650121	650489	369	+	9.23749	258.259	322.123	325.916	449.707	371.405	916.207	327.424	260.458	237.167	972.678	1168.29	1350.54	899.95	707.029	728.552	1574.2	1348.82	1057.07	689.572	542.858	476.038	28.8395	36.0775	36.8655	65.655	52.0433	121.535	42.249	30.6725
pgaptmp_000247	pgaptmp_000247	pgaptmp_000247	protein_coding	protein_coding		0.5	1000				TRUE	-1.22871	0.000461647	0.00687992	pgaptmp_000247	1	1000	1000	+	11.5647	2019.82	2372.8	2884.23	2718.1	2745.94	3075.19	1834.61	1694.1	1566.57	5176.18	4092.66	5079.8	2172.55	2512.9	2810.13	5184.4	4312.75	4199.17	4851.03	3938.27	2781.46	83.2282	98.0623	120.385	146.43	141.982	150.524	87.3528	73.6166
pgaptmp_000240	pgaptmp_000240	pgaptmp_000240	protein_coding	protein_coding		0.5	1000				TRUE	-1.24336	0.000463623	0.00687992	pgaptmp_000240	1	1000	1000	+	11.2082	670.703	691.772	865.024	783.464	1234.37	1750.77	619.952	701.52	576.379	8719.79	10986.3	11267.5	7853.58	4582.93	5806.02	10282.8	8613.51	7240.72	1948.01	1248.83	1173.89	27.6368	28.5894	36.1051	42.2069	63.825	85.6963	29.5183	30.4844
pgaptmp_004042	pgaptmp_004042	pgaptmp_004042	protein_coding	protein_coding	pgaptmp_004042	0.4457	543				TRUE	-0.619303	0.000463712	0.00687992	Chromosome_II	811491	812033	543	-	9.70464	521.915	479.664	425.569	811.01	869.797	496.451	521.205	535.842	579.194	1144.21	1101.17	1081.91	1780.75	2065.59	2312.13	750.019	766.947	998.857	778.423	781.155	888.936	39.6057	36.5072	32.7123	80.462	82.8251	44.7516	45.7027	42.8819
pgaptmp_003891	pgaptmp_003891	pgaptmp_003891	protein_coding	protein_coding	pgaptmp_003891	0.4913	1437				TRUE	0.68837	0.000468301	0.00689161	Chromosome_II	659739	661175	1437	-	8.52581	978.301	1005.09	539.925	235.103	245.1	192.972	389.79	454.495	424.367	320.863	366.453	337.172	430.091	358.509	363.617	326.974	363.501	399.543	253.141	226.828	275.819	28.0527	28.9062	15.6826	8.81386	8.81922	6.57312	12.9154	13.7439
pgaptmp_003826	pgaptmp_003826	gltS	protein_coding	protein_coding	pgaptmp_003826	0.4564	1227	GO:0015813	GO:0015501	GO:0016020	TRUE	0.834876	0.000468412	0.00689161	Chromosome_II	589691	590917	1227	-	8.22666	269.823	276.357	349.604	417.036	379.598	578.917	586.541	526.14	472.926	205.836	206.81	214.901	248.922	241.966	185.761	252.815	225.024	206.386	324.11	275.252	251.727	9.06134	9.30823	11.8925	18.3102	15.9964	23.0943	22.7608	18.6335
pgaptmp_003097	pgaptmp_003097	ompR	protein_coding	protein_coding	pgaptmp_003097	0.5097	720	GO:0000160,GO:0006355	GO:0003677		TRUE	0.980891	0.000469175	0.00689161	Chromosome_I	3353014	3353733	720	-	12.1808	6790.29	7576.05	7558.14	4982.01	6237.42	4648.66	8641.46	9953.37	8749.84	1757.68	2461.76	2165.68	4872.4	3143.34	3715.22	3220.87	3560.45	4480.96	3484.18	5072.41	4885.83	388.61	434.862	438.15	372.766	447.936	316.03	571.462	600.724
pgaptmp_004220	pgaptmp_004220	pgaptmp_004220	protein_coding	protein_coding	pgaptmp_004220	0.4022	828				TRUE	-1.01281	0.000469734	0.00689161	Chromosome_II	1069684	1070511	828	-	9.5354	522.686	625.763	599.554	894.29	937.387	1031.66	657.817	555.246	629.161	1138.15	968.741	935.558	550.87	742.547	687.711	515.743	454.044	416.742	1493.14	1130.32	991.122	26.0117	31.2335	30.2231	58.1851	58.5373	60.9873	37.8275	29.1402
pgaptmp_005058	pgaptmp_005058	pgaptmp_005058	protein_coding	protein_coding	pgaptmp_005058	0.4458	498				TRUE	0.755573	0.000473921	0.00691368	Chromosome_II	2022254	2022751	498	-	10.1106	1000.66	1237.44	1168.07	1921.83	2027.71	1556.97	2104.12	2242.63	2085.94	748.679	990.51	881.833	556.761	571.617	612.616	827.549	728.334	666.786	1028.77	1342.49	1318.45	82.797	102.692	97.8993	207.897	210.533	153.033	201.175	195.688
pgaptmp_000444	pgaptmp_000444	pgaptmp_000444	protein_coding	protein_coding	pgaptmp_000444	0.4261	1671				TRUE	-1.15252	0.0004747	0.00691368	Chromosome_I	478437	480107	1671	-	11.792	2877.08	3331.24	3479.7	4361.26	4000.79	4221.48	2460.5	2480.69	2563.8	3711.11	3954.79	4070.14	2194.64	2324.21	2400.4	4825.4	4429.92	3978.23	6339.14	5960.61	3855.66	70.947	82.3894	86.9173	140.605	123.798	123.658	70.1101	64.5111
pgaptmp_004086	pgaptmp_004086	pgaptmp_004086	protein_coding	protein_coding	pgaptmp_004086	0.4694	20780				TRUE	0.731879	0.000475176	0.00691368	Chromosome_II	872625	893399	20775	+	12.1504	3049	2793.49	2617.13	3339.49	3765.94	2997.67	3674.42	4541.22	4305.6	3206.61	3149.32	3099.38	11727.3	11159.3	10219.5	11712.1	12465.6	12127.8	2396.74	2316.7	2587.88	6.04603	5.55576	5.25678	8.65763	9.37068	7.06108	8.4193	9.49652
pgaptmp_001233	pgaptmp_001233	pgaptmp_001233	protein_coding	protein_coding	pgaptmp_001233	0.4395	405				TRUE	-1.356	0.000478475	0.0069425	Chromosome_I	1315727	1316131	405	+	12.6285	2685.12	3643.68	3848.09	5777.01	4941.6	10589.6	3992.19	2806.83	2875.56	9730.81	9779.93	12534.6	8183.51	7756.24	8878.32	8772.69	9737.3	6728.72	10386.6	7187.13	6403.66	273.192	371.815	396.58	768.444	630.894	1279.84	469.342	301.16
pgaptmp_005085	pgaptmp_005085	malX	protein_coding	protein_coding	pgaptmp_005085	0.4885	1572	GO:0009401	GO:0008982		TRUE	0.810436	0.000480578	0.00695386	Chromosome_II	2046248	2047819	1572	-	7.03407	144.163	176.903	111.906	122.997	122.209	103.908	243.526	262.697	209.72	98.8822	96.1484	94.4821	111.941	97.6744	86.952	84.2718	111.846	243.43	120.144	147.821	118.802	3.77884	4.65078	2.97126	4.21508	4.01969	3.23542	7.37608	7.26172
pgaptmp_001914	pgaptmp_001914	pgaptmp_001914	protein_coding	protein_coding	pgaptmp_001914	0.4342	1338				TRUE	0.626923	0.00048194	0.00695446	Chromosome_I	2058994	2060331	1338	-	9.35486	1088.54	1228.64	1305.3	777.058	709.356	740.552	1247.33	1127.66	1174.57	391.493	426.319	409.423	416.835	394.027	511.172	399.448	375.485	324.132	695.719	798.358	726.934	33.5234	37.95	40.7187	31.2868	27.4127	27.0915	44.3872	36.6233
pgaptmp_000244	pgaptmp_000244	pgaptmp_000244	protein_coding	protein_coding		0.5	1000				TRUE	-1.15078	0.000487892	0.00700861	pgaptmp_000244	1	1000	1000	+	10.7008	602.862	678.57	831.534	689.935	791.966	1225.46	625.149	575.396	534.857	4300.37	4297.65	5917.18	3568.87	2942.44	3372.68	6134.99	4810.73	4770.7	1644.58	1051.95	1053.43	24.8414	28.0438	34.7073	37.1683	40.9497	59.9834	29.7657	25.0037
pgaptmp_003811	pgaptmp_003811	pgaptmp_003811	protein_coding	protein_coding	pgaptmp_003811	0.412	267				TRUE	-1.16973	0.000488354	0.00700861	Chromosome_II	568128	568394	267	+	7.61165	59.3611	85.3713	100.47	186.417	133.815	200.394	98.0044	70.152	95.7113	437.907	419.062	353.845	187.06	268.605	223.967	591.588	507.304	415.419	251.465	186.687	160.341	9.16112	13.2142	15.706	37.6131	25.9142	36.7373	17.477	11.4174
pgaptmp_001290	pgaptmp_001290	pgaptmp_001290	protein_coding	protein_coding	pgaptmp_001290	0.3636	429				TRUE	-0.925891	0.000491553	0.00703536	Chromosome_I	1373255	1373683	429	+	8.99548	720.813	799.146	768.638	1102.49	989.275	746.325	541.994	489.571	571.453	228.034	204.996	233.426	215.045	372.939	350.443	439.899	362.17	281.797	1209.27	872.906	881.459	69.2346	76.9858	74.7834	138.446	119.235	85.1537	60.1547	49.5902
pgaptmp_004696	pgaptmp_004696	pgaptmp_004696	protein_coding	protein_coding	pgaptmp_004696	0.453	1011				TRUE	0.74713	0.000498437	0.00710611	Chromosome_II	1606767	1607777	1011	-	6.71062	112.555	92.4123	102.104	135.168	131.084	93.1876	167.795	153.737	174.532	100.9	61.6801	75.9562	75.1186	85.4651	82.9996	87.6426	113.178	138.914	83.8215	107.042	87.2321	4.58744	3.77764	4.21533	7.20258	6.70413	4.51169	7.90245	6.60793
pgaptmp_003932	pgaptmp_003932	pgaptmp_003932	protein_coding	protein_coding	pgaptmp_003932	0.4372	1107		GO:0016746		TRUE	-0.650948	0.000499839	0.00710611	Chromosome_II	702720	703826	1107	+	11.2303	2440.74	2735.4	2423.54	4115.91	3854.01	3806.67	3306.16	3108.33	3285.85	1091.74	1122.94	1198.63	1325.62	1148.78	1385.96	2201.18	1772.23	2053.28	4980.68	4606.01	5189.06	90.8516	102.121	91.3783	200.301	180.015	168.318	142.203	122.016
pgaptmp_004558	pgaptmp_004558	pgaptmp_004558	protein_coding	protein_coding	pgaptmp_004558	0.5084	297				TRUE	-0.60872	0.000500544	0.00710611	Chromosome_II	1442910	1443206	297	+	6.97212	69.383	57.2076	72.6979	113.388	168.634	121.226	96.5194	89.5557	95.7113	151.35	170.527	150.06	169.385	116.543	185.761	156.746	154.455	181.249	144.173	137.626	145.387	9.62621	7.96047	10.2166	20.5671	29.3584	19.979	15.4736	13.1031
pgaptmp_004572	pgaptmp_004572	pgaptmp_004572	protein_coding	protein_coding	pgaptmp_004572	0.463	972	GO:0017013	GO:0016740,GO:0046872	GO:0005886	TRUE	-0.899095	0.000504586	0.00712523	Chromosome_II	1458038	1459009	972	-	6.64391	61.6738	58.0877	73.5148	112.106	148.152	157.512	78.7005	73.1372	70.376	113.008	116.104	96.3347	98.6852	85.4651	73.7774	106.182	119.836	109.808	169.319	124.883	123.786	2.61452	2.46979	3.15682	6.21339	7.88108	7.93194	3.85517	3.26971
pgaptmp_004703	pgaptmp_004703	pgaptmp_004703	protein_coding	protein_coding	pgaptmp_004703	0.508	1368				TRUE	0.682876	0.000504597	0.00712523	Chromosome_II	1619590	1620957	1368	+	7.12435	137.224	167.222	162.549	126.84	122.209	130.298	279.164	243.293	285.023	106.954	92.5202	94.4821	98.6852	99.8943	81.6821	102.812	138.477	146.852	166.525	166.298	146.218	4.13336	5.05184	4.95952	4.99501	4.61912	4.66212	9.71641	7.72825
pgaptmp_004164	pgaptmp_004164	tssK	protein_coding	protein_coding	pgaptmp_004164	0.4517	1326	GO:0033103	GO:0003674		TRUE	-0.679304	0.000510088	0.00718351	Chromosome_II	1004415	1005740	1326	+	6.38885	65.5284	68.6491	68.6138	90.9664	94.2167	79.1682	118.051	96.2724	99.9338	60.5401	87.0778	72.251	45.6603	59.9366	60.6029	79.2155	69.2383	48.9506	163.731	166.935	169.479	2.03631	2.1396	2.15978	3.69574	3.67391	2.9224	4.23895	3.15497
pgaptmp_000643	pgaptmp_000643	pgaptmp_000643	protein_coding	protein_coding	pgaptmp_000643	0.4388	1413				TRUE	-0.727389	0.000515086	0.00722457	Chromosome_I	656297	657709	1413	-	9.13884	616.738	570.316	556.262	608.578	695.701	329.043	320.742	400.016	399.032	607.419	535.166	477.968	667.23	734.778	692.981	751.704	715.019	658.849	615.25	632.06	561.608	17.9853	16.6807	16.4315	23.2027	25.458	11.3984	10.808	12.3019
pgaptmp_001719	pgaptmp_001719	pgaptmp_001719	protein_coding	protein_coding	pgaptmp_001719	0.4777	1053	GO:0009061	GO:0008863,GO:0009055	GO:0009326	TRUE	1.25462	0.000515752	0.00722457	Chromosome_I	1814537	1815589	1053	-	11.0402	3971.02	2989.76	2682.47	1663.02	2274.17	1726.86	2018	3219.53	2914.97	5287.17	6314.96	5752.3	2526.05	2018.97	1986.72	734.85	985.314	867.881	890.185	1028.37	1389.07	155.393	117.341	106.328	85.0811	111.671	80.2713	91.2484	132.862
pgaptmp_005157	pgaptmp_005157	pgaptmp_005157	protein_coding	protein_coding	pgaptmp_005157	0.4246	471				TRUE	0.549936	0.000518091	0.00722457	Chromosome_II	2123963	2124433	471	-	7.64085	309.911	345.006	326.732	452.27	398.031	295.231	647.423	627.636	654.496	90.8102	76.1931	101.893	69.2269	85.4651	69.8251	47.1922	54.5917	60.8575	413.52	434.541	422.868	27.1128	30.2724	28.9542	51.7298	43.6958	30.6813	65.4485	57.9062
pgaptmp_005210	pgaptmp_005210	pgaptmp_005210	protein_coding	protein_coding	pgaptmp_005210	0.4472	597	GO:0006355	GO:0003677,GO:0003700		TRUE	-0.810967	0.000519119	0.00722457	Chromosome_II	2181428	2182024	597	-	8.24719	189.647	178.664	198.49	212.041	277.188	316.673	205.661	164.932	171.717	518.627	647.641	579.861	360.864	335.201	334.633	482.035	415.43	367.791	352.05	303.924	279.973	13.0897	12.3681	13.8773	19.1342	24.0073	25.9639	16.4025	12.0051
pgaptmp_004828	pgaptmp_004828	pgaptmp_004828	protein_coding	protein_coding	pgaptmp_004828	0.4737	1959	GO:0006812,GO:1902600	GO:0051139	GO:0016020	TRUE	0.706195	0.000519862	0.00722457	Chromosome_II	1754671	1756629	1959	+	10.4577	1157.93	1310.49	1347.77	1219.08	1324.5	1180.1	1914.8	2138.14	1857.22	1396.46	1420.46	1470.96	1792.54	1676	1802.28	1075.31	1111.81	1434.12	1048.89	1289.61	1167.25	24.3559	27.6466	28.7159	33.5244	34.9591	29.4861	46.5394	47.4285
pgaptmp_001861	pgaptmp_001861	pgaptmp_001861	protein_coding	protein_coding	pgaptmp_001861	0.4861	2448	GO:0009061	GO:0009055,GO:0009389,GO:0030151,GO:0043546,GO:0051539		TRUE	1.03151	0.000524329	0.00725178	Chromosome_I	1991306	1993753	2448	-	8.89042	3646.46	2774.13	2234.03	2114.01	2900.23	2057.55	2006.12	3113.55	2756.63	48.4321	88.892	66.6933	69.2269	75.4757	77.7298	50.5631	43.9397	56.8885	1072.92	1280.05	1375.77	61.3789	46.8335	38.0907	46.5221	61.2584	41.1407	39.0192	55.2691
pgaptmp_000489	pgaptmp_000489	pgaptmp_000489	protein_coding	protein_coding	pgaptmp_000489	0.4237	354				TRUE	1.73979	0.000524573	0.00725178	Chromosome_I	510351	510704	354	+	7.44652	3732.04	2078.84	2197.27	121.716	118.795	49.4801	115.081	184.336	237.871	215.926	199.553	209.343	106.05	170.93	165.999	84.2718	94.5369	78.0564	29.0581	54.7955	58.9855	434.411	242.694	259.073	18.5228	17.3516	6.84164	15.4786	22.6279
pgaptmp_001232	pgaptmp_001232	pgaptmp_001232	protein_coding	protein_coding	pgaptmp_001232	0.4395	669				TRUE	-0.655358	0.000529318	0.00728948	Chromosome_I	1314788	1315456	669	-	8.76781	526.54	581.757	578.316	530.424	553.011	422.23	308.12	317.923	330.767	397.547	306.587	351.992	407.997	457.294	422.903	433.157	440.728	473.63	439.225	548.592	485.176	32.4312	35.9383	36.0811	42.7131	42.7417	30.8927	21.9294	20.6506
pgaptmp_000850	pgaptmp_000850	pgaptmp_000850	protein_coding	protein_coding	pgaptmp_000850	0.426	507		GO:0016779		TRUE	0.579802	0.000533517	0.00728948	Chromosome_I	897788	898294	507	+	8.73246	639.095	750.74	753.118	475.332	509.316	479.957	658.56	656.742	698.129	298.665	284.817	274.183	319.622	322.991	357.03	259.557	264.97	250.045	436.99	449.833	411.237	51.9416	61.196	62.0006	50.5072	51.9426	46.3369	61.8472	56.2891
pgaptmp_003577	pgaptmp_003577	thiD	protein_coding	protein_coding	pgaptmp_003577	0.4845	873	GO:0009228	GO:0008902,GO:0008972		TRUE	-0.659758	0.000533692	0.00728948	Chromosome_II	329373	330245	873	-	6.52881	57.8192	51.9269	67.797	115.95	126.988	101.434	103.944	87.3168	101.341	82.7381	68.9366	64.8407	89.8477	122.093	98.809	70.7883	81.2219	63.5035	144.732	153.555	162.002	2.72908	2.45821	3.24143	7.15519	7.52127	5.68726	5.66915	4.34632
pgaptmp_004610	pgaptmp_004610	pgaptmp_004610	protein_coding	protein_coding	pgaptmp_004610	0.4704	3378				TRUE	0.87143	0.000536507	0.00728948	Chromosome_II	1507690	1511067	3378	-	11.2473	1958.91	1471.56	1686.76	1155.02	1514.29	1164.43	1558.42	1990.38	1881.15	3456.84	3956.6	2908.57	7221.7	7102.48	5479.29	6182.18	6686.82	5471.88	837.098	894.569	1140.66	23.8954	18.0036	20.8417	18.4201	23.179	16.8728	21.9663	25.6043
pgaptmp_003121	pgaptmp_003121	pckA	protein_coding	protein_coding	pgaptmp_003121	0.4721	1629	GO:0006094	GO:0004612		TRUE	0.631195	0.000537804	0.00728948	Chromosome_I	3377293	3378921	1629	+	8.73472	834.909	772.743	659.182	548.361	515.461	353.783	699.395	828.391	716.427	203.818	252.163	209.343	366.756	433.985	414.998	224.163	221.03	248.722	450.401	466.399	481.022	21.1192	19.6045	16.8898	18.1347	16.3613	10.6304	20.4425	22.0979
pgaptmp_003191	pgaptmp_003191	pgaptmp_003191	protein_coding	protein_coding		0.5	1000				TRUE	-1.66581	0.00053859	0.00728948	pgaptmp_003191	1	1000	1000	+	13.5809	3487.65	3839.95	4801.33	8992.22	9976.04	14621.4	4139.2	4100.91	3515.98	32754.2	45507.2	40199.4	23354.5	15701.2	17705.3	34531.2	28333.1	25332.6	17296.3	11177.7	7584.2	143.712	158.696	200.402	484.43	515.825	715.683	197.083	178.204
pgaptmp_000819	pgaptmp_000819	pgaptmp_000819	protein_coding	protein_coding	pgaptmp_000819	0.4583	384				TRUE	0.668338	0.000538759	0.00728948	Chromosome_I	863232	863615	384	-	10.2831	2498.56	2735.4	3179.11	1795.63	1643.33	2325.57	2585.24	2232.18	2221.77	581.185	624.058	502.052	679.013	544.979	562.553	822.493	817.545	701.184	1384.73	1514.52	1386.57	268.112	294.396	345.553	251.912	221.278	296.435	320.554	252.601
pgaptmp_004304	pgaptmp_004304	pgaptmp_004304	protein_coding	protein_coding	pgaptmp_004304	0.4521	1431			GO:0098561	TRUE	0.667406	0.000539577	0.00728948	Chromosome_II	1160074	1161504	1431	-	10.0347	955.944	1026.22	1126.41	1269.05	1058.23	1001.15	1835.35	1637.38	1674.95	657.869	830.868	681.753	508.155	705.92	721.965	1451.16	1243.63	1812.49	1135.5	996.514	999.43	27.5265	29.6375	32.8547	47.7751	38.2371	34.2445	61.0679	49.7218
pgaptmp_002377	pgaptmp_002377	pgaptmp_002377	protein_coding	protein_coding	pgaptmp_002377	0.4669	726				TRUE	-0.629789	0.000539757	0.00728948	Chromosome_I	2590575	2591300	726	+	10.402	1527.97	1717.11	1647.55	1826.38	1480.16	1359.88	1271.09	1120.94	1247.06	1309.68	1144.71	1332.01	1119.41	1523.94	1396.5	933.731	850.832	874.496	1842.96	1709.49	1916.61	86.7234	97.7468	94.7201	135.524	105.418	91.6846	83.3626	67.0939
pgaptmp_000243	pgaptmp_000243	pgaptmp_000243	protein_coding	protein_coding		0.5	1000				TRUE	-1.14658	0.000542064	0.00730192	pgaptmp_000243	1	1000	1000	+	11.0266	679.954	766.582	988.365	835.994	1041.16	1614.7	740.972	674.653	632.68	6469.72	6022.88	7930.94	5267.14	3710.52	4408.2	7690.64	6441.83	5606.83	1937.39	1265.39	1205.46	28.018	31.6811	41.2533	45.0368	53.8347	79.036	35.2805	29.3169
pgaptmp_003833	pgaptmp_003833	pgaptmp_003833	protein_coding	protein_coding	pgaptmp_003833	0.4472	360				TRUE	0.914825	0.000546613	0.00734442	Chromosome_II	598755	599114	360	+	8.79433	495.703	642.485	663.267	771.933	786.504	1006.92	1226.54	973.919	982.448	219.962	234.022	226.016	276.908	202.008	221.332	217.421	231.682	218.293	607.427	567.707	448.622	56.7385	73.7568	76.9	115.516	112.965	136.907	162.223	117.559
pgaptmp_002749	pgaptmp_002749	pgaptmp_002749	protein_coding	protein_coding	pgaptmp_002749	0.3821	369		GO:0035438		TRUE	-0.708677	0.000550618	0.0073794	Chromosome_I	2977127	2977495	369	+	10.1132	986.781	901.24	960.593	1144.13	1174.29	1048.98	619.209	585.098	674.905	1880.78	2049.96	1728.47	721.728	1230.92	1081.63	2047.8	1609.79	1382.52	1104.21	888.197	994.445	110.193	100.938	108.656	167.037	164.549	139.147	79.8995	68.9032
pgaptmp_003619	pgaptmp_003619	speA	protein_coding	protein_coding	pgaptmp_003619	0.4741	1911	GO:0006527,GO:0008295	GO:0008792		TRUE	0.606006	0.000553647	0.00740117	Chromosome_II	368785	370695	1911	-	8.81321	541.188	543.912	477.029	597.688	644.497	509.645	667.469	763.463	703.056	369.295	604.102	527.988	296.056	269.715	284.57	278.097	252.986	289.735	421.343	455.567	476.038	11.6693	11.7628	10.419	16.8491	17.4383	13.0539	16.6304	17.3606
pgaptmp_001263	pgaptmp_001263	pgaptmp_001263	protein_coding	protein_coding	pgaptmp_001263	0.4468	1701				TRUE	0.593208	0.000555906	0.00741255	Chromosome_I	1348993	1350693	1701	+	8.68217	770.152	832.591	795.593	541.314	573.493	419.756	703.107	729.879	769.913	163.458	177.784	214.901	291.637	342.97	285.887	242.703	235.677	261.952	433.637	468.311	507.607	18.6565	20.2287	19.5222	17.1439	17.4328	12.0789	19.6811	18.6459
pgaptmp_005081	pgaptmp_005081	pgaptmp_005081	protein_coding	protein_coding	pgaptmp_005081	0.4465	804				TRUE	0.656581	0.000559178	0.00743735	Chromosome_II	2041834	2042637	804	+	6.04087	77.8632	79.2105	65.3465	62.139	86.7066	73.3955	99.4893	113.437	104.156	52.4681	30.8401	37.0518	53.0249	39.9577	42.1585	91.0135	71.9013	68.7954	63.7044	63.7157	59.8163	3.99057	4.07163	3.3924	4.16364	5.57622	4.46834	5.89187	6.13108
pgaptmp_001122	pgaptmp_001122	pgaptmp_001122	protein_coding	protein_coding	pgaptmp_001122	0.4662	414				TRUE	-0.980152	0.000562722	0.00746563	Chromosome_I	1192789	1193202	414	+	8.95375	474.117	500.786	436.188	496.472	528.433	602.833	413.549	271.652	359.621	748.679	696.623	657.67	359.391	489.482	411.046	483.72	444.723	362.499	739.306	584.91	692.041	47.1893	49.9912	43.9758	64.6038	65.9984	71.2737	47.5619	28.5135
pgaptmp_003381	pgaptmp_003381	pgaptmp_003381	protein_coding	protein_coding	pgaptmp_003381	0.4559	1926				TRUE	0.642975	0.00056973	0.00753962	Chromosome_II	116684	118609	1926	-	7.73772	176.541	176.903	205.025	295.961	299.718	277.089	418.003	435.838	433.516	113.008	116.104	133.387	172.331	130.972	173.904	173.6	145.134	189.187	249.229	296.278	245.911	3.77701	3.79596	4.44315	8.27833	8.04638	7.04199	10.3337	9.83346
pgaptmp_001056	pgaptmp_001056	dusC	protein_coding	protein_coding	pgaptmp_001056	0.4552	960	GO:0002943	GO:0017150,GO:0050660		TRUE	-0.707616	0.000574566	0.00755603	Chromosome_I	1121988	1122947	960	-	10.5605	1627.42	1825.36	1757.82	1406.14	1402.33	1945.39	1200.55	1064.22	1031.01	1812.17	1551.07	1789.6	1627.57	1476.22	1594.12	1291.04	1344.82	1223.76	1865.31	1783.4	1576.82	69.8532	78.5814	76.4265	78.9079	75.5304	99.1902	59.5447	48.1724
pgaptmp_001932	pgaptmp_001932	pgaptmp_001932	protein_coding	protein_coding	pgaptmp_001932	0.4418	498	GO:0000160			TRUE	0.694544	0.000577911	0.00755603	Chromosome_I	2083765	2084262	498	+	8.5098	1002.2	925.883	1003.89	862.9	750.32	582.216	852.341	1040.34	1027.49	106.954	116.104	94.4821	136.981	132.082	151.507	106.182	154.455	174.635	524.164	614.857	603.147	82.9245	76.8366	84.1387	93.3459	77.9042	57.2252	81.4923	90.7785
pgaptmp_001068	pgaptmp_001068	pgaptmp_001068	protein_coding	protein_coding	pgaptmp_001068	0.466	1560		GO:0015103	GO:0016020	TRUE	-0.72341	0.00057809	0.00755603	Chromosome_I	1136374	1137933	1560	-	13.2577	7832.58	8530.09	8977.79	6374.7	7346.85	8617.79	6512.09	5759.93	5534.36	14687	16679	16465.8	11366.5	10373.5	12298.4	13783.5	14478.8	12815.8	9319.84	9869.57	9323.86	206.889	225.98	240.207	220.14	243.512	270.398	198.76	160.446
pgaptmp_003404	pgaptmp_003404	pgaptmp_003404	protein_coding	protein_coding	pgaptmp_003404	0.4411	900		GO:0001216		TRUE	0.599631	0.000579056	0.00755603	Chromosome_II	147031	147930	900	+	8.41372	262.885	326.523	278.539	517.612	488.834	437.074	722.411	645.548	673.498	177.584	244.906	177.849	232.72	245.296	271.395	274.726	251.655	259.306	397.873	452.382	449.453	12.036	14.9939	12.9177	30.9832	28.0843	23.7709	38.2186	31.169
pgaptmp_004185	pgaptmp_004185	pgaptmp_004185	protein_coding	protein_coding	pgaptmp_004185	0.4603	1827	GO:0019290			TRUE	0.575336	0.000579352	0.00755603	Chromosome_II	1025547	1027373	1827	-	8.2001	257.488	328.284	304.678	475.332	509.316	507.996	537.539	496.288	503.188	189.692	248.535	220.458	212.1	170.93	180.491	175.285	183.748	189.187	332.492	342.791	317.359	5.80734	7.42595	6.96055	14.0159	14.4143	13.6099	14.0089	11.8041
pgaptmp_004048	pgaptmp_004048	pgaptmp_004048	protein_coding	protein_coding	pgaptmp_004048	0.4605	747	GO:0042953,GO:0044874		GO:0009279	TRUE	0.749342	0.000581113	0.00755603	Chromosome_II	816567	817313	747	+	6.60066	159.581	217.389	194.406	171.683	175.461	184.726	233.874	201.5	204.794	38.3421	45.353	42.6096	51.552	58.8266	36.8887	38.765	43.9397	46.3046	105.615	138.263	117.14	8.80276	12.027	10.8625	12.3814	12.1452	12.1043	14.9071	11.7218
pgaptmp_000337	pgaptmp_000337	dusA	protein_coding	protein_coding	pgaptmp_000337	0.4811	981	GO:0002943	GO:0017150,GO:0050660		TRUE	-0.64372	0.000581859	0.00755603	Chromosome_I	355467	356447	981	+	11.9381	3266.4	3692.09	3783.56	3352.3	3094.81	4038.4	2716.65	2809.81	2667.25	4671.68	4504.46	5633.73	5359.93	4032.4	4765.23	4417.53	4388.64	4495.52	3850.76	4486.22	4086.61	137.201	155.541	160.98	184.094	163.121	201.499	131.855	124.465
pgaptmp_000433	pgaptmp_000433	pgaptmp_000433	protein_coding	protein_coding	pgaptmp_000433	0.4757	801				TRUE	-0.589134	0.000583058	0.00755603	Chromosome_I	466665	467465	801	+	10.7742	1066.96	1109.83	1204.83	1007.04	1301.96	1692.22	1154.52	1108.25	1085.2	2492.23	3167.46	2949.32	2389.07	1926.85	2163.26	3129.85	3071.78	3003.19	1689.84	1632.4	1567.68	54.8874	57.2617	62.7816	67.7294	84.0448	103.409	68.6281	60.1234
pgaptmp_004674	pgaptmp_004674	pnuC	protein_coding	protein_coding	pgaptmp_004674	0.4512	738	GO:0015890	GO:0015663	GO:0016020	TRUE	-0.919903	0.000584041	0.00755603	Chromosome_II	1587609	1588346	738	-	7.99158	131.828	171.623	159.282	222.932	238.955	266.368	164.083	176.873	133.714	405.619	375.523	450.18	266.597	251.956	279.3	419.673	326.219	343.977	329.139	313.481	244.25	7.36053	9.61082	9.00848	16.2735	16.7419	17.6668	10.5862	10.4146
pgaptmp_005223	pgaptmp_005223	pgaptmp_005223	protein_coding	protein_coding	pgaptmp_005223	0.4925	2061	GO:0009313,GO:0030980	GO:0004556		TRUE	0.600255	0.000585316	0.00755603	Chromosome_II	2193209	2195269	2061	-	7.26295	119.493	102.974	104.554	169.121	177.51	156.687	221.252	231.352	223.092	102.918	132.431	135.239	163.493	166.49	163.364	141.577	161.112	194.479	128.526	149.095	147.879	2.38904	2.06486	2.11741	4.42062	4.45336	3.72124	5.11143	4.8779
pgaptmp_003659	pgaptmp_003659	pgaptmp_003659	protein_coding	protein_coding	pgaptmp_003659	0.431	819				TRUE	0.606887	0.000586851	0.00755732	Chromosome_II	416056	416874	819	+	9.1293	576.65	638.965	684.504	874.431	815.179	854.357	1133.73	1141.84	1150.65	294.629	272.118	276.036	406.524	324.101	368.887	353.941	323.556	464.369	680.072	796.447	697.026	29.0126	32.2429	34.8846	57.5183	51.4651	51.0609	65.9112	60.5839
pgaptmp_002361	pgaptmp_002361	pgaptmp_002361	protein_coding	protein_coding	pgaptmp_002361	0.4539	1236		GO:0004386,GO:0005524,GO:0016887		TRUE	-0.597272	0.000594692	0.00763962	Chromosome_I	2569525	2570760	1236	-	11.5056	3375.1	3435.98	3271.41	2335.02	2588.23	2534.21	2144.22	2277.7	2378	3424.55	3724.39	3923.79	2938.46	2883.61	3011.7	2646.13	2603.09	2462.08	3285.8	3288.37	3407.03	112.519	114.888	110.473	101.774	108.275	100.359	82.6006	80.0785
pgaptmp_001140	pgaptmp_001140	ati1	protein_coding	protein_coding	pgaptmp_001140	0.4133	450				TRUE	-0.819831	0.000599812	0.00767551	Chromosome_I	1210605	1211054	450	-	9.03876	934.358	917.082	973.662	590	577.589	492.327	601.39	749.283	794.544	407.637	555.121	437.211	125.198	162.051	159.412	365.74	350.186	349.269	1176.85	1101.01	1410.67	85.5577	84.2243	90.3102	70.6324	66.3667	53.5518	63.6322	72.3554
pgaptmp_002084	pgaptmp_002084	pgaptmp_002084	protein_coding	protein_coding	pgaptmp_002084	0.4608	879		GO:0050661,GO:0051287		TRUE	0.931596	0.000600401	0.00767551	Chromosome_I	2256789	2257667	879	+	9.53475	1636.67	1958.26	2094.35	1008.96	849.315	1142.17	2508.02	1985.15	1871.3	252.25	239.464	289.004	243.031	239.746	274.03	455.068	384.805	500.09	997.476	1269.22	957.891	76.7238	92.0711	99.4494	61.837	49.9602	63.6023	135.855	98.1392
pgaptmp_001055	pgaptmp_001055	pgaptmp_001055	protein_coding	protein_coding	pgaptmp_001055	0.436	1461		GO:0046872,GO:0052621		TRUE	-0.678127	0.000609892	0.00776101	Chromosome_I	1120462	1121922	1461	+	9.81193	770.923	810.588	829.083	957.71	896.424	1013.52	775.868	614.949	667.868	1166.41	1055.82	909.622	808.63	913.478	974.916	928.675	946.701	838.775	1096.94	1065.96	1040.97	21.743	22.9293	23.6858	35.3141	31.7254	33.9558	25.2854	18.2905
pgaptmp_002165	pgaptmp_002165	sctU	protein_coding	protein_coding	pgaptmp_002165	0.4454	1053	GO:0009306,GO:0030254		GO:0016020	TRUE	-0.61231	0.000610036	0.00776101	Chromosome_I	2347722	2348774	1053	+	8.56051	380.065	449.74	475.396	390.771	352.971	489.028	423.201	364.193	385.66	345.079	382.78	416.833	195.898	216.438	205.523	337.087	358.175	330.747	604.074	550.504	594.009	14.8726	17.6512	18.8438	19.9921	17.3322	22.732	19.136	15.0294
pgaptmp_002559	pgaptmp_002559	lptE	protein_coding	protein_coding	pgaptmp_002559	0.4534	558	GO:0043165		GO:0019867	TRUE	-0.735616	0.000615353	0.00780979	Chromosome_I	2763210	2763767	558	+	10.191	1087.77	1146.79	991.633	1076.86	1170.2	898.889	750.624	829.137	828.325	1907.01	1710.72	1708.09	1274.07	1718.18	1453.15	1075.31	966.673	907.57	1298.67	1111.84	1492.08	80.3271	84.9361	74.175	103.966	108.435	78.8505	64.0503	64.5698
pgaptmp_000475	pgaptmp_000475	pgaptmp_000475	protein_coding	protein_coding		0.5	1000				TRUE	-1.4661	0.000624873	0.00789166	pgaptmp_000475	1	1000	1000	+	13.4242	3774.44	4734.15	5840.34	9576.46	7886.89	14105.1	4891.31	4335.24	3544.13	33107.4	28053.6	32663	14182.7	13364.7	13936	28797.4	18654.4	15366.5	14576.6	12103.4	7460.42	155.529	195.652	243.769	515.904	407.802	690.415	232.894	188.387
pgaptmp_004188	pgaptmp_004188	pgaptmp_004188	protein_coding	protein_coding	pgaptmp_004188	0.4774	1215				TRUE	-0.904777	0.000629625	0.00789166	Chromosome_II	1030359	1031573	1215	-	6.13938	37.0043	41.3655	31.0396	86.4822	99.6785	75.8695	35.638	53.7334	47.1519	86.7742	63.4943	61.1355	89.8477	98.7843	82.9996	91.0135	107.852	99.2242	85.498	80.919	99.6938	1.25497	1.40703	1.0663	3.83455	4.24198	3.0565	1.39659	1.92179
pgaptmp_002394	pgaptmp_002394	pgaptmp_002394	protein_coding	protein_coding	pgaptmp_002394	0.4338	597				TRUE	-1.16522	0.000629918	0.00789166	Chromosome_I	2605866	2606462	597	-	9.55637	344.602	460.301	489.282	534.268	486.786	899.713	444.732	355.984	385.66	1089.72	934.273	1043.01	877.857	1175.42	1250.26	1557.34	1440.69	1222.44	1072.36	904.763	618.932	23.785	31.8647	34.2078	48.2113	42.1607	73.7671	35.4696	25.9116
pgaptmp_000749	pgaptmp_000749	pgaptmp_000749	protein_coding	protein_coding	pgaptmp_000749	0.4912	855	GO:0055085	GO:0015267		TRUE	0.777941	0.000630107	0.00789166	Chromosome_I	786000	786854	855	-	7.49997	309.911	270.196	232.797	179.37	173.413	169.057	190.812	200.008	169.606	193.728	321.1	142.65	125.198	177.59	177.856	185.398	185.079	268.567	86.0568	117.237	105.509	14.9358	13.0603	11.3645	11.3018	10.4872	9.67832	10.626	10.1653
pgaptmp_005066	pgaptmp_005066	pgaptmp_005066	protein_coding	protein_coding	pgaptmp_005066	0.461	885				TRUE	0.80271	0.00063076	0.00789166	Chromosome_II	2029125	2030009	885	-	8.14145	291.409	304.52	320.198	423.442	409.638	388.419	669.696	764.955	693.907	131.17	201.367	164.881	206.208	214.218	180.491	85.9572	147.797	153.467	313.493	439.001	423.699	13.5681	14.2205	15.1014	25.776	23.9332	21.4827	36.0303	37.5604
pgaptmp_005194	pgaptmp_005194	fucO	protein_coding	protein_coding	pgaptmp_005194	0.443	1149		GO:0008912		TRUE	0.743884	0.000630926	0.00789166	Chromosome_II	2163932	2165080	1149	-	8.90013	582.047	535.111	534.207	662.389	897.789	538.509	912.48	893.319	1100.68	264.358	306.587	290.857	372.647	330.761	362.3	251.13	304.915	264.598	483.93	616.768	574.07	20.8735	19.2471	19.4058	31.0569	40.4016	22.9406	37.8126	33.785
pgaptmp_000687	pgaptmp_000687	pgaptmp_000687	protein_coding	protein_coding	pgaptmp_000687	0.4711	2040				TRUE	-0.612941	0.000632291	0.00789166	Chromosome_I	712279	714318	2040	-	10.8897	2125.43	2312.07	2250.37	1905.81	1870.68	1494.3	1618.56	1567.23	1611.61	1473.14	1306.17	1482.07	1844.09	2192.12	2210.69	1830.38	1880.09	2438.27	2535.88	2216.67	2366.07	42.9315	46.8395	46.0431	50.3285	47.4147	35.8542	37.7773	33.384
pgaptmp_003189	pgaptmp_003189	pgaptmp_003189	protein_coding	protein_coding		0.5	1000				TRUE	-1.47496	0.000638853	0.00790959	pgaptmp_003189	1	1000	1000	+	12.8355	2009.8	2592.82	3020.64	5639.92	7507.29	11098.4	2562.22	2455.32	2259.77	22958.8	31052.3	25869.6	15069.4	7636.36	9209	16610	14080.7	11926.7	8961.64	6439.75	4170.52	82.8152	107.156	126.078	303.834	388.175	543.241	121.997	106.695
pgaptmp_002532	pgaptmp_002532	pgaptmp_002532	protein_coding	protein_coding		0.5	1000				TRUE	-1.27105	0.0006394	0.00790959	pgaptmp_002532	1	1000	1000	+	13.1621	2774.55	3009.12	3931.41	5939.08	5240.63	10546.7	3228.2	3002.36	2428.67	39274.4	40313.4	41664.8	18445.3	12546.7	13974.2	29151.3	20289.5	17655.3	8460.94	6967.95	4807.73	114.328	124.36	164.093	319.951	270.974	516.237	153.707	130.467
pgaptmp_002119	pgaptmp_002119	pgaptmp_002119	protein_coding	protein_coding	pgaptmp_002119	0.5088	1710				TRUE	0.577795	0.000640201	0.00790959	Chromosome_I	2303167	2304876	1710	-	8.92038	383.149	332.684	418.217	178.089	266.264	305.952	277.679	302.997	269.54	692.175	800.028	789.204	1721.84	1374.1	1410.99	1110.7	1163.74	1172.17	181.054	184.776	179.449	9.23271	8.0404	10.2081	5.61055	8.05121	8.7577	7.73178	7.6998
pgaptmp_002597	pgaptmp_002597	pomA	protein_coding	protein_coding	pgaptmp_002597	0.479	762				TRUE	0.563927	0.000640368	0.00790959	Chromosome_I	2806439	2807200	762	-	10.498	1533.37	1387.94	1466.21	939.132	1064.38	1176.8	1523.52	1603.79	1512.38	2173.39	2389.2	2589.92	1352.13	1194.29	1356.98	1794.99	1684.35	1823.08	963.948	1007.35	1065.89	82.918	75.2764	80.3124	66.3951	72.2244	75.5929	95.1977	91.46
pgaptmp_002778	pgaptmp_002778	pgaptmp_002778	protein_coding	protein_coding	pgaptmp_002778	0.4531	1035		GO:0047834		TRUE	0.627226	0.000641237	0.00790959	Chromosome_I	3008346	3009380	1035	+	11.1889	6653.06	7679.9	7035.36	5600.84	4801.64	3072.72	6553.67	7130.88	6863.06	653.833	571.448	553.925	908.788	1300.85	1123.79	635.409	637.791	632.389	4154.19	4278.51	4457.97	264.874	306.66	283.718	291.526	239.879	145.316	301.493	299.392
pgaptmp_002064	pgaptmp_002064	pgaptmp_002064	protein_coding	protein_coding	pgaptmp_002064	0.4206	573				TRUE	-0.774627	0.000644598	0.00793247	Chromosome_I	2228052	2228624	573	-	5.37857	46.2554	41.3655	44.1089	44.8426	61.4456	26.3894	28.9558	23.8815	21.8165	40.3601	50.7954	61.1355	44.1874	66.5962	39.5236	37.0796	45.2712	26.4598	44.7048	43.9639	49.8469	3.32633	2.98349	3.21301	4.216	5.54473	2.25428	2.4061	1.81111
pgaptmp_004010	pgaptmp_004010	pgaptmp_004010	protein_coding	protein_coding	pgaptmp_004010	0.4345	267				TRUE	-0.667325	0.00065396	0.00802892	Chromosome_II	778746	779012	267	-	7.81005	87.1143	125.857	137.228	205.635	258.754	247.401	158.886	134.334	137.937	223.998	234.022	187.112	416.835	471.723	505.902	303.378	331.545	326.778	201.73	239.571	235.111	13.4442	19.4808	21.4522	41.4907	50.1095	45.3547	28.3339	21.8631
pgaptmp_004430	pgaptmp_004430	pgaptmp_004430	protein_coding	protein_coding		0.5	1000				TRUE	-1.44024	0.000656314	0.00803909	pgaptmp_004430	1	1000	1000	+	11.2158	854.953	909.161	1168.88	2522.72	1708.87	3621.12	1190.16	1151.54	1123.2	5777.54	3316.21	5802.31	2377.28	2307.56	2686.29	5519.8	4267.48	3861.81	4163.69	3016.94	1932.4	35.229	37.5736	48.788	135.904	88.3595	177.246	56.668	50.0398
pgaptmp_001733	pgaptmp_001733	pgaptmp_001733	protein_coding	protein_coding	pgaptmp_001733	0.4603	819				TRUE	1.37607	0.000658079	0.008042	Chromosome_I	1833626	1834444	819	+	10.9007	5105.05	4045.9	4016.36	2991	3713.37	1629.55	3250.48	4097.18	4500.54	3093.6	3176.53	2021.18	1281.43	1434.04	1090.85	417.988	527.276	357.207	951.654	1544.47	1929.91	256.847	204.161	204.687	196.742	234.438	97.3902	188.971	217.389
pgaptmp_002380	pgaptmp_002380	pgaptmp_002380	protein_coding	protein_coding	pgaptmp_002380	0.4109	258	GO:0006633			TRUE	-0.876706	0.00065987	0.00804522	Chromosome_I	2592366	2592623	258	+	11.1159	1741.51	2101.72	2079.65	2073.65	1873.41	2233.2	1513.87	1329.16	1404.7	2738.43	2412.78	2456.54	2449.46	2519.56	2561.13	3335.48	2919.99	2553.37	3023.72	2412.91	2125.14	278.141	336.664	336.443	432.992	375.454	423.683	279.384	223.869
pgaptmp_002198	pgaptmp_002198	pgaptmp_002198	protein_coding	protein_coding	pgaptmp_002198	0.4737	570				TRUE	-0.703077	0.000682622	0.00830339	Chromosome_I	2382909	2383478	570	+	10.6591	1255.83	1518.2	1637.75	1752.06	1415.3	2006.42	1535.4	1202.29	1301.96	1685.03	1583.73	1674.74	1695.32	1535.04	1541.42	1179.8	1874.76	1670.94	1983.22	2148.49	2259.73	90.7853	110.077	119.926	165.592	128.386	172.298	128.257	91.658
pgaptmp_000619	pgaptmp_000619	opaR	protein_coding	protein_coding	pgaptmp_000619	0.4472	615				TRUE	1.18125	0.000686566	0.00833155	Chromosome_I	626466	627080	615	-	12.2255	6642.27	8920.86	10648.2	7421.45	6381.47	10804.8	8548.65	6396.52	6297.24	4913.84	4658.66	1672.89	2592.33	3034.57	1413.63	9703.05	6686.82	2405.19	3754.09	2954.5	2338.65	445.041	599.478	722.674	650.097	536.525	859.953	661.844	451.966
pgaptmp_002341	pgaptmp_002341	pgaptmp_002341	protein_coding	protein_coding	pgaptmp_002341	0.4288	618	GO:0006400	GO:0016432		TRUE	-0.761487	0.0006881	0.00833155	Chromosome_I	2544710	2545327	618	-	9.49155	588.214	666.248	714.727	650.858	686.143	933.525	530.857	468.675	501.077	845.543	789.143	887.391	711.417	631.554	694.298	1041.6	904.093	699.861	963.389	776.058	736.072	39.2198	44.5543	48.2717	56.7365	57.4077	73.9384	40.8999	32.955
pgaptmp_002928	pgaptmp_002928	cgtA	protein_coding	protein_coding	pgaptmp_002928	0.4638	1173		GO:0000287,GO:0003924,GO:0005525		TRUE	-0.738297	0.000691391	0.00835219	Chromosome_I	3186557	3187729	1173	-	13.4462	8341.38	7738.87	7488.71	7242.72	7920.34	6611.37	4626.99	5473.35	5867.24	23094	23799.5	27342.4	22532.6	18400.5	19727.6	17080.2	17755.6	15481.6	8669.94	8750.08	8398.37	293.021	272.66	266.471	332.635	349.132	275.884	187.816	202.765
pgaptmp_003401	pgaptmp_003401	pgaptmp_003401	protein_coding	protein_coding	pgaptmp_003401	0.4663	519	GO:0006352,GO:0006355	GO:0003700,GO:0016987		TRUE	-0.93704	0.00070363	0.00846653	Chromosome_II	143481	143999	519	-	5.04518	13.8766	22.0029	15.5198	34.5929	34.1365	42.0581	23.7586	19.4037	28.1504	24.216	39.9107	33.3466	38.2958	32.1882	28.984	62.3611	30.6246	46.3046	40.2343	53.5212	58.1547	1.10173	1.75208	1.24813	3.59074	3.40091	3.96657	2.17965	1.62463
pgaptmp_002268	pgaptmp_002268	pgaptmp_002268	protein_coding	protein_coding	pgaptmp_002268	0.454	978				TRUE	-0.551722	0.000705099	0.00846653	Chromosome_I	2461303	2462280	978	+	10.5439	1742.29	1813.04	1828.07	2078.77	1913.69	1701.29	1381.71	1351.55	1304.07	1168.42	1275.33	1109.7	1007.47	1177.64	1125.11	1486.55	1256.94	1614.05	1902.19	1882.16	1962.31	73.4072	76.6144	78.0179	114.507	101.176	85.1476	67.2685	60.0522
pgaptmp_000137	pgaptmp_000137	coaA	protein_coding	protein_coding	pgaptmp_000137	0.4351	924	GO:0015937	GO:0004594		TRUE	-0.551873	0.000705678	0.00846653	Chromosome_I	143066	143989	924	-	11.1928	2257.26	2125.48	2048.61	1855.2	1840.64	1629.55	1478.23	1551.55	1520.82	2346.94	1899.39	2363.91	4308.27	4617.34	4479.34	3153.45	3141.02	3171.2	2174.33	2130.65	2170	100.663	95.0664	92.5398	108.164	103.001	86.3231	76.1734	72.9679
pgaptmp_000324	pgaptmp_000324	pgaptmp_000324	protein_coding	protein_coding	pgaptmp_000324	0.3973	657				TRUE	-0.625001	0.000722526	0.00864896	Chromosome_I	343441	344097	657	+	12.5812	6406.37	6341.24	5867.3	5097.32	6668.22	5284.48	4339.66	4512.12	4742.64	5462.74	6915.43	6945.36	7952.26	6440.96	6791.47	7213.66	6552.34	6395.33	6372.11	7003	6961.95	401.795	398.888	372.746	417.966	524.793	393.704	314.502	298.437
pgaptmp_002697	pgaptmp_002697	suhB	protein_coding	protein_coding	pgaptmp_002697	0.4502	804	GO:0046854	GO:0008934		TRUE	-1.30864	0.000728778	0.00868214	Chromosome_I	2919603	2920406	804	+	14.3848	12952.3	15057	17763.6	18191.4	14729.2	29401.1	14769.7	10690	10702.1	30294.3	25221.7	29939.7	21676.9	25296.6	28625.6	31453.6	32383.6	22631.1	36464.6	28483.5	21698.4	663.817	773.972	922.181	1218.91	947.256	1789.95	874.679	577.774
pgaptmp_005022	pgaptmp_005022	pgaptmp_005022	protein_coding	protein_coding	pgaptmp_005022	0.4416	951				TRUE	1.09535	0.000728784	0.00868214	Chromosome_II	1978716	1979666	951	-	11.0527	3335.01	3556.55	3134.18	3106.95	3554.29	2748.62	5710.98	6718.17	6209.27	657.869	741.976	718.805	1636.41	1289.75	1180.44	1063.51	1193.03	1186.72	1986.01	3447.66	3027.37	144.502	154.558	137.558	176.002	193.249	141.471	285.932	306.979
pgaptmp_002439	pgaptmp_002439	pgaptmp_002439	protein_coding	protein_coding	pgaptmp_002439	0.4595	222				TRUE	-1.0114	0.000732369	0.00868214	Chromosome_I	2655505	2655726	222	+	12.8659	5502.08	6592.08	7357.2	7291.41	6502.31	12078.1	5365	4683.77	4938.28	9496.72	9096.01	9909.51	8008.23	7024.79	7796.69	6392.86	8377.84	6384.75	12122.8	9217.76	7895.75	1021.25	1227.19	1383.25	1769.39	1514.46	2663.04	1150.67	916.811
pgaptmp_005188	pgaptmp_005188	pgaptmp_005188	protein_coding	protein_coding	pgaptmp_005188	0.4689	981				TRUE	-0.713268	0.000732428	0.00868214	Chromosome_II	2158605	2159585	981	+	11.1252	1848.67	1640.54	1437.62	1233.17	1492.45	1232.88	1622.27	1734.4	1787.55	3472.98	3272.68	3303.17	3509.95	3877.01	3766.6	2170.84	2410.03	2112.81	2446.47	2547.36	3204.32	77.6514	69.1129	61.1669	67.7203	78.6636	61.5155	78.7384	76.8275
pgaptmp_003304	pgaptmp_003304	agaR	protein_coding	protein_coding	pgaptmp_003304	0.4488	771				TRUE	0.704569	0.000734631	0.00868214	Chromosome_II	40313	41083	771	-	8.41876	320.704	470.863	501.534	736.7	718.231	692.722	896.888	851.526	866.328	165.476	154.2	151.912	163.493	172.04	181.809	136.52	158.449	145.529	545.958	561.973	436.991	17.1399	25.2395	27.1511	51.4755	48.1675	43.9782	55.3881	47.9933
pgaptmp_000921	pgaptmp_000921	ccmB	protein_coding	protein_coding	pgaptmp_000921	0.4469	669	GO:0015886	GO:0015232		TRUE	-0.552719	0.000735188	0.00868214	Chromosome_I	967967	968635	669	+	10.2295	917.398	910.921	1025.94	1031.38	1131.97	1006.92	875.357	787.344	822.695	1491.3	1375.1	1328.31	1926.57	1883.56	1831.26	1306.21	1355.47	1513.5	1165.12	1155.8	1222.91	56.5054	56.2725	64.0083	83.0533	87.4885	73.6719	62.3006	51.1418
pgaptmp_001123	pgaptmp_001123	pgaptmp_001123	protein_coding	protein_coding	pgaptmp_001123	0.4768	2112				TRUE	-0.531098	0.000738672	0.00870377	Chromosome_I	1193269	1195380	2112	+	10.3234	1230.39	1201.36	1297.13	1096.08	1166.78	1061.35	851.599	899.289	891.663	1695.12	1917.53	1819.24	1366.86	1500.63	1486.09	1414.08	1495.28	1399.72	1212.06	1257.11	1241.19	24.0054	23.5083	25.6348	27.9584	28.5654	24.5978	19.1988	18.503
pgaptmp_000521	pgaptmp_000521	pgaptmp_000521	protein_coding	protein_coding	pgaptmp_000521	0.4398	498				TRUE	-0.955719	0.000740338	0.00870393	Chromosome_I	529326	529823	498	-	8.37248	293.722	381.971	379.826	384.365	407.589	463.464	260.603	208.963	225.203	357.187	308.401	353.845	362.337	387.368	379.427	244.388	223.693	224.908	550.987	379.746	391.298	24.3033	31.6988	31.8344	41.5795	42.3192	45.5532	24.9162	18.2338
pgaptmp_001707	pgaptmp_001707	ttcA	protein_coding	protein_coding	pgaptmp_001707	0.4407	894	GO:0008033			TRUE	-0.886351	0.000747833	0.00877246	Chromosome_I	1803595	1804488	894	-	11.4799	2492.39	2916.71	2949.58	2568.84	2392.97	3749.77	2159.07	1948.58	1829.77	3196.52	3452.27	3923.79	2554.03	2612.79	2764.02	3611.89	2990.56	2611.58	4278.25	3310.67	3048.14	114.878	134.833	137.709	154.797	138.402	205.305	114.99	94.715
pgaptmp_002338	pgaptmp_002338	pgaptmp_002338	protein_coding	protein_coding	pgaptmp_002338	0.4568	1215	GO:0009058	GO:0003824,GO:0030170		TRUE	-0.738988	0.000755108	0.00883812	Chromosome_I	2541439	2542653	1215	+	11.8729	20985.3	19843.1	18718.5	2210.74	2297.38	1397.81	2576.33	2960.56	3010.68	2393.35	3281.75	2589.92	2847.14	2371.93	2562.45	2770.86	3308.79	2847.07	3963.64	4697.12	5196.54	711.7	674.956	643.036	98.0225	97.769	56.3126	100.962	105.885
pgaptmp_004388	pgaptmp_004388	pgaptmp_004388	protein_coding	protein_coding	pgaptmp_004388	0.4626	441				TRUE	0.756392	0.000759486	0.00886068	Chromosome_II	1253796	1254236	441	-	6.29981	37.7752	62.4883	66.1633	64.0609	62.8111	68.4475	69.791	92.5409	80.2286	82.7381	116.104	79.6614	164.966	107.664	98.809	119.666	153.123	111.131	45.8224	43.9639	40.7083	3.52961	5.85601	6.26209	7.82561	7.36447	7.59717	7.53518	9.1187
pgaptmp_003567	pgaptmp_003567	pgaptmp_003567	protein_coding	protein_coding	pgaptmp_003567	0.4312	552		GO:0008080,GO:0016746		TRUE	0.536839	0.000762342	0.00886068	Chromosome_II	319290	319841	552	-	8.44762	471.805	526.31	535.024	741.184	667.709	602.008	952.573	862.72	928.963	131.17	107.033	116.713	150.237	189.799	209.475	168.544	130.488	158.759	592.898	612.945	621.425	35.2194	39.4043	40.4553	72.3355	62.545	53.3821	82.1659	67.9154
pgaptmp_003032	pgaptmp_003032	pgaptmp_003032	protein_coding	protein_coding	pgaptmp_003032	0.4457	516		GO:0015288	GO:0009279	TRUE	-0.630508	0.000763263	0.00886068	Chromosome_I	3284365	3284880	516	-	12.2814	3571.69	3550.39	3357.99	3571.39	3888.14	3625.24	2450.11	2833.69	2741.14	8647.15	8891.01	9103.63	8330.8	7889.43	8365.83	7377.15	7531	7669.37	4137.99	3813.39	4099.08	285.221	284.36	271.626	372.865	389.616	343.891	226.083	238.639
pgaptmp_001219	pgaptmp_001219	nrfD	protein_coding	protein_coding	pgaptmp_001219	0.4537	972				TRUE	0.694422	0.000763765	0.00886068	Chromosome_I	1301551	1302522	972	+	7.60684	359.25	364.368	343.069	271.618	281.285	272.141	376.426	329.864	380.03	86.7742	134.245	98.1873	141.4	95.4545	115.936	91.0135	122.499	127.007	183.29	240.845	219.326	15.2296	15.4923	14.7318	15.0542	14.9632	13.7044	18.4394	14.7471
pgaptmp_002604	pgaptmp_002604	ribE	protein_coding	protein_coding	pgaptmp_002604	0.4352	471		GO:0000906	GO:0009349	TRUE	-1.04844	0.000782301	0.00905578	Chromosome_I	2812661	2813131	471	-	13.7175	11432.8	13307.4	13620.7	13731.4	13275.7	18677.9	10769.3	8802.58	9248.81	20418.2	16764.3	19604.1	14380.1	15802.2	15278.5	8083.35	8594.87	7634.97	23628.2	18419.6	15628.7	1000.21	1167.65	1207.03	1570.58	1457.4	1941.07	1088.68	812.132
pgaptmp_005246	pgaptmp_005246	pgaptmp_005246	protein_coding	protein_coding	pgaptmp_005246	0.4759	891		GO:0001216		TRUE	0.606245	0.000784126	0.00905699	Chromosome_II	2226009	2226899	891	+	7.60593	329.955	321.243	294.876	274.18	268.313	264.719	354.895	401.508	395.513	102.918	110.661	101.893	101.631	96.5645	85.6345	124.722	121.167	149.498	216.26	254.226	256.711	15.2593	14.9004	13.8135	16.5777	15.5707	14.5425	18.9651	19.5819
pgaptmp_001928	pgaptmp_001928	pgaptmp_001928	protein_coding	protein_coding	pgaptmp_001928	0.4578	1173				TRUE	-0.699678	0.000788497	0.00906014	Chromosome_I	2077814	2078986	1173	-	9.14182	511.122	461.181	553.811	544.517	557.107	595.411	372.714	335.088	348.361	817.291	796.399	781.793	623.042	653.753	671.901	630.353	653.769	592.699	606.309	588.733	477.699	17.955	16.2486	19.7063	25.0079	24.5575	24.8457	15.129	12.4136
pgaptmp_002414	pgaptmp_002414	pgaptmp_002414	protein_coding	protein_coding	pgaptmp_002414	0.4783	600				TRUE	-0.661324	0.000790545	0.00906014	Chromosome_I	2625153	2625752	600	-	8.87532	405.505	447.979	440.272	516.971	499.075	566.547	409.094	328.371	397.624	514.591	560.564	550.22	590.638	539.429	542.791	279.782	360.838	355.884	561.604	552.415	638.871	27.8486	30.8566	30.6274	46.4172	43.0089	46.2187	32.4642	23.7821
pgaptmp_000974	pgaptmp_000974	pgaptmp_000974	protein_coding	protein_coding	pgaptmp_000974	0.4589	438				TRUE	-0.802549	0.000790804	0.00906014	Chromosome_I	1031227	1031664	438	+	9.75747	740.086	810.588	885.445	575.907	530.481	952.492	616.982	475.392	490.52	1414.62	1293.47	1445.02	1036.93	1092.18	1164.63	959.013	1097.16	810.992	1017.03	835.313	835.766	69.6252	76.4835	84.3778	70.8341	62.6238	106.444	67.0704	47.1645
pgaptmp_003069	pgaptmp_003069	pyrE	protein_coding	protein_coding	pgaptmp_003069	0.4673	642	GO:0009220	GO:0004588		TRUE	-0.598587	0.000794622	0.00906014	Chromosome_I	3319989	3320630	642	-	10.2545	708.478	741.939	722.078	1130.03	1056.18	1232.88	830.81	775.403	722.057	1267.31	1454.93	1561.73	1639.35	1264.22	1488.72	2952.88	2571.14	2517.65	1198.65	1078.71	1149.8	45.4726	47.7611	46.9451	94.8245	85.0644	93.998	61.6168	52.4844
pgaptmp_004609	pgaptmp_004609	pgaptmp_004609	protein_coding	protein_coding	pgaptmp_004609	0.469	6198		GO:0003676,GO:0005524		TRUE	0.930615	0.000796008	0.00906014	Chromosome_II	1501476	1507673	6198	-	11.8552	3200.1	2395.68	2516.66	1774.49	2184.73	1849.73	2551.83	3493.42	3294.3	5018.77	5121.27	4281.34	9563.63	9465.54	6834.95	9684.51	9799.88	8680.13	1305.94	1554.66	1887.54	21.275	15.9742	16.9478	15.4236	18.226	14.608	19.6034	24.4927
pgaptmp_000968	pgaptmp_000968	aqpZ	protein_coding	protein_coding	pgaptmp_000968	0.4635	699	GO:0006833	GO:0015250		TRUE	-0.832967	0.000798188	0.00906014	Chromosome_I	1025925	1026623	699	-	8.39141	298.347	330.924	317.747	483.659	396.666	630.871	495.961	377.627	374.4	326.917	306.587	311.235	263.652	218.657	208.158	161.802	145.134	119.069	773.393	765.226	629.732	17.5874	19.5656	18.9734	37.2758	29.3421	44.177	33.7834	23.4759
pgaptmp_001659	pgaptmp_001659	pgaptmp_001659	protein_coding	protein_coding	pgaptmp_001659	0.464	750		GO:0005524,GO:0016887,GO:0042626,GO:0140359		TRUE	0.650268	0.000798789	0.00906014	Chromosome_I	1744945	1745694	750	-	7.97057	396.254	411.015	441.089	307.492	312.007	319.147	412.064	424.643	354.695	171.53	159.643	192.669	226.829	176.48	192.348	155.06	154.455	117.746	218.495	260.597	250.065	21.7706	22.6484	24.5474	22.087	21.5103	20.8287	26.1599	24.6037
pgaptmp_003412	pgaptmp_003412	pgaptmp_003412	protein_coding	protein_coding	pgaptmp_003412	0.4313	684				TRUE	0.555062	0.000799399	0.00906014	Chromosome_II	157030	157713	684	-	9.79863	945.922	938.205	1032.47	1262	1469.23	1189.17	1778.93	1644.09	1639.06	651.815	703.879	526.136	487.534	509.461	525.664	626.982	531.271	613.867	1054.47	1139.24	1140.66	56.9846	56.6869	63.0034	99.3956	111.065	85.0984	123.833	104.45
pgaptmp_003987	pgaptmp_003987	pgaptmp_003987	protein_coding	protein_coding	pgaptmp_003987	0.4568	915		GO:0003677,GO:0003700		TRUE	0.585305	0.00079988	0.00906014	Chromosome_II	754480	755394	915	+	8.63397	424.778	399.573	411.683	532.986	535.943	440.373	565.01	676.146	642.532	343.061	351.94	326.056	403.578	358.509	325.411	214.05	234.345	273.859	402.343	395.675	412.068	19.1293	18.0475	18.7794	31.3805	30.2859	23.5577	29.4014	32.1112
pgaptmp_004350	pgaptmp_004350	pgaptmp_004350	protein_coding	protein_coding	pgaptmp_004350	0.453	2640				TRUE	0.591565	0.000802614	0.00906724	Chromosome_II	1214588	1217227	2640	-	8.79253	442.51	496.386	522.772	720.685	722.328	726.533	772.898	697.788	727.687	312.791	299.33	246.395	343.189	361.839	346.49	267.984	260.975	300.319	488.959	484.877	432.006	6.9068	7.77065	8.26512	14.7064	14.1473	13.4705	13.9396	11.4857
pgaptmp_004389	pgaptmp_004389	pgaptmp_004389	protein_coding	protein_coding	pgaptmp_004389	0.4604	417				TRUE	0.945554	0.000804479	0.00906724	Chromosome_II	1254251	1254667	417	-	5.44294	19.2731	24.6433	27.7722	16.0152	33.4537	42.0581	34.153	46.2705	40.8181	76.6841	88.892	61.1355	91.3206	57.7167	54.0156	111.239	121.167	100.547	18.9995	19.1147	12.4617	1.90447	2.44233	2.77982	2.069	4.14813	4.93681	3.89965	4.82176
pgaptmp_003759	pgaptmp_003759	lafA	protein_coding	protein_coding	pgaptmp_003759	0.4636	852				TRUE	-0.678383	0.000805671	0.00906724	Chromosome_II	513366	514217	852	-	6.80376	151.872	148.74	152.747	133.247	86.7066	91.5382	132.157	108.959	107.675	125.116	94.3343	70.3985	44.1874	74.3657	88.2694	133.149	93.2054	79.3793	196.701	175.855	180.28	7.34507	7.21488	7.48299	8.42521	5.26207	5.25891	7.38558	5.55729
pgaptmp_001348	pgaptmp_001348	pgaptmp_001348	protein_coding	protein_coding	pgaptmp_001348	0.3391	696				TRUE	0.62587	0.000807727	0.009071	Chromosome_I	1419658	1420353	696	+	9.79175	844.16	857.234	887.895	862.259	1028.87	1042.38	998.605	916.454	1095.05	1073.58	1057.63	974.463	1285.85	884.619	786.52	866.314	896.103	689.277	581.163	684.944	617.271	49.9774	50.9016	53.2468	66.741	76.4357	73.3078	68.3152	57.2188
pgaptmp_000960	pgaptmp_000960	pgaptmp_000960	protein_coding	protein_coding	pgaptmp_000960	0.442	405			GO:0005886,GO:0016020	TRUE	-1.20504	0.000809873	0.00907574	Chromosome_I	1013370	1013774	405	+	10.0963	732.377	903.88	867.474	1266.48	1285.58	2149.09	882.782	716.446	664.349	1015.06	903.433	785.499	924.99	873.52	804.964	1838.81	1347.48	1502.92	2206.74	1617.11	1246.17	74.514	92.2353	89.401	168.465	164.13	259.736	103.784	76.8716
pgaptmp_004431	pgaptmp_004431	pgaptmp_004431	protein_coding	protein_coding		0.5	1000				TRUE	-1.53769	0.000815606	0.00912059	pgaptmp_004431	1	1000	1000	+	11.351	844.16	928.523	1144.38	2469.55	2009.96	4012.01	1225.05	1314.98	1180.2	6171.05	4284.96	6915.72	2730.78	2501.8	3019.6	6097.91	4792.09	4262.67	5029.85	3289.64	2143.42	34.7843	38.3738	47.7652	133.04	103.927	196.379	58.3295	57.142
pgaptmp_000212	pgaptmp_000212	epmB	protein_coding	protein_coding	pgaptmp_000212	0.4751	1023				TRUE	-0.791	0.000823936	0.00917674	Chromosome_I	230448	231470	1023	-	10.5545	1259.69	1505	1596.9	1455.46	1538.87	1909.11	1158.23	1112.73	1102.09	1396.46	1663.55	1506.16	1433.15	1350.79	1442.61	1636.56	1897.4	1424.86	2259.27	1751.55	1650.76	50.7394	60.7998	65.1545	76.646	77.7805	91.3456	53.908	47.2663
pgaptmp_001328	pgaptmp_001328	pgaptmp_001328	protein_coding	protein_coding	pgaptmp_001328	0.4247	405		GO:0005515,GO:0070064		TRUE	0.633291	0.000825231	0.00917674	Chromosome_I	1399453	1399857	405	+	8.48211	418.611	407.494	476.212	372.194	393.252	464.288	472.203	380.612	458.147	359.205	399.107	322.351	271.016	332.981	234.507	482.035	379.479	244.753	279.405	270.155	261.696	42.5906	41.5822	49.078	49.5083	50.2065	56.1133	55.5145	40.838
pgaptmp_001536	pgaptmp_001536	pgaptmp_001536	protein_coding	protein_coding	pgaptmp_001536	0.4685	429				TRUE	0.813678	0.000825854	0.00917674	Chromosome_I	1593059	1593487	429	+	7.66904	373.127	418.056	468.044	294.039	258.754	272.141	324.454	367.925	358.214	117.044	108.847	116.713	167.912	105.444	100.126	160.116	181.085	82.0253	149.202	223.005	199.388	35.8391	40.2734	45.5376	36.9243	31.1871	31.0505	36.0104	37.2683
pgaptmp_004247	pgaptmp_004247	pgaptmp_004247	protein_coding	protein_coding	pgaptmp_004247	0.4671	1413	GO:0006081	GO:0050269		TRUE	0.794149	0.000832375	0.00920868	Chromosome_II	1097553	1098965	1413	+	9.12379	423.237	386.371	428.836	479.175	615.139	490.678	634.801	859.735	732.614	474.231	625.872	561.335	687.851	582.717	652.14	664.062	643.117	878.465	352.05	450.47	435.329	12.3424	11.3007	12.6675	18.2691	22.51	16.9976	21.3909	26.4399
pgaptmp_001175	pgaptmp_001175	yciA	protein_coding	protein_coding	pgaptmp_001175	0.4697	396		GO:0016790		TRUE	-0.585604	0.000832631	0.00920868	Chromosome_I	1252476	1252871	396	-	10.8792	1977.42	1901.05	1918.74	1752.06	1913.01	2093.01	1442.59	1493.34	1507.45	2191.55	2109.82	2536.2	2392.01	1705.97	2218.59	1179.8	1746.94	1637.86	1940.19	2283.57	2253.91	205.76	198.399	202.237	238.352	249.784	258.707	173.453	163.871
pgaptmp_000133	pgaptmp_000133	pssA	protein_coding	protein_coding	pgaptmp_000133	0.4265	1341	GO:0032049	GO:0008444		TRUE	-0.866738	0.000833974	0.00920868	Chromosome_I	139090	140430	1341	-	12.8786	6852.73	8166.6	7984.52	7690.51	7168.66	6880.21	6017.62	5514.39	5681.45	6590.8	7102.29	6975.01	5546.99	7260.09	6758.54	10523.9	9497.63	9030.72	12201.1	9008.77	9181.8	210.568	251.683	248.52	308.952	276.41	251.134	213.663	178.693
pgaptmp_002847	pgaptmp_002847	pgaptmp_002847	protein_coding	protein_coding	pgaptmp_002847	0.4653	591	GO:1901135	GO:0008968,GO:0097367		TRUE	-0.68026	0.000837344	0.00922655	Chromosome_I	3095958	3096548	591	+	10.6704	1476.32	1402.03	1507.05	1625.22	1425.54	979.706	1075.08	1195.57	1223.13	1789.97	1670.81	1835.92	1975.18	2713.79	2389.86	1727.57	1789.54	1976.55	1783.72	1595.44	2062.83	102.932	98.0416	106.434	148.146	124.72	81.1412	86.6134	87.9072
pgaptmp_002090	pgaptmp_002090	pgaptmp_002090	protein_coding	protein_coding	pgaptmp_002090	0.4769	2166		GO:0016829		TRUE	0.765002	0.000843668	0.00923686	Chromosome_I	2263408	2265573	2166	+	7.37706	426.32	408.374	337.351	198.589	207.55	140.194	288.073	331.356	329.359	84.7561	99.7767	90.777	66.2811	83.2452	90.9043	139.891	94.5369	125.684	142.497	199.43	191.911	8.11028	7.79187	6.50077	4.93924	4.95459	3.16813	6.33253	6.64774
pgaptmp_004791	pgaptmp_004791	pgaptmp_004791	protein_coding	protein_coding	pgaptmp_004791	0.4195	348				TRUE	-0.934862	0.000843722	0.00923686	Chromosome_II	1715376	1715723	348	-	10.4226	591.298	824.67	813.564	1279.3	1093.73	2013.84	1205.75	938.096	1037.34	1791.99	1961.07	2239.78	1200.42	1085.52	1300.33	2005.67	2071.82	1426.18	2417.41	1776.39	1707.26	70.014	97.936	97.5783	198.041	162.508	283.256	164.972	117.14
pgaptmp_004505	pgaptmp_004505	pgaptmp_004505	protein_coding	protein_coding	pgaptmp_004505	0.4688	192				TRUE	0.851621	0.000843734	0.00923686	Chromosome_II	1382109	1382300	192	-	8.94937	988.323	1368.58	1329.8	1586.79	1589.39	1800.25	1752.94	1512.75	1270.29	171.53	268.49	250.1	104.577	103.224	118.571	129.779	141.14	89.9633	901.92	814.924	707.826	212.107	294.585	289.085	445.227	428.03	458.949	434.709	342.375
pgaptmp_002103	pgaptmp_002103	pgaptmp_002103	protein_coding	protein_coding	pgaptmp_002103	0.4744	957	GO:0055085			TRUE	0.581811	0.000845295	0.00923686	Chromosome_I	2282560	2283516	957	+	8.32128	561.232	599.36	622.425	458.035	435.581	444.496	714.986	671.668	682.647	149.332	134.245	170.438	154.656	144.292	177.856	180.342	170.433	168.02	414.078	490.611	428.683	24.1651	25.8832	27.1466	25.784	23.5343	22.7347	35.5728	30.4986
pgaptmp_003190	pgaptmp_003190	pgaptmp_003190	protein_coding	protein_coding		0.5	1000				TRUE	-1.51856	0.000847623	0.00924312	pgaptmp_003190	1	1000	1000	+	13.6493	3907.04	4623.25	5749.67	10098.6	11043.8	18769.5	4866.81	4727.8	4088.14	31789.6	37712	39324.9	24887.8	14284.9	16852.9	33037.9	26241.3	22436.6	17661.2	12402.3	7830.12	160.993	191.069	239.985	544.031	571.036	918.723	231.727	205.445
pgaptmp_001405	pgaptmp_001405	pgaptmp_001405	protein_coding	protein_coding	pgaptmp_001405	0.4333	420				TRUE	0.721253	0.000854442	0.00928669	Chromosome_I	1459695	1460114	420	+	6.10972	95.5944	84.4912	81.6831	98.0131	114.016	80.8175	106.171	102.989	106.268	56.5041	34.4683	42.6096	58.9165	51.0571	40.8411	50.5631	85.2164	48.9506	50.2929	57.3442	70.6164	9.37867	8.31388	8.11753	12.5718	14.0365	9.41866	12.0362	10.6556
pgaptmp_003960	pgaptmp_003960	pgaptmp_003960	protein_coding	protein_coding	pgaptmp_003960	0.4593	246				TRUE	1.1101	0.000855569	0.00928669	Chromosome_II	727765	728010	246	-	7.0739	243.612	270.196	200.94	177.449	148.835	235.855	428.398	281.354	308.247	74.6661	132.431	29.6415	55.9707	47.7273	28.984	190.454	103.857	99.2242	157.584	173.307	113.817	40.8057	45.3926	34.0936	38.8599	31.2834	46.9292	82.9173	49.6999
pgaptmp_000655	pgaptmp_000655	rsmC	protein_coding	protein_coding	pgaptmp_000655	0.4357	1026	GO:0006364	GO:0003676,GO:0008990		TRUE	-0.738516	0.000856907	0.00928669	Chromosome_I	675295	676320	1026	-	11.0031	1804.73	2061.23	2086.19	1950.01	1708.19	2073.22	1602.22	1462.74	1414.56	2649.64	2514.37	2602.89	2065.03	2388.58	2364.83	1852.29	1944	1991.1	2773.37	2334.54	2140.09	72.4808	83.0274	84.8685	102.389	86.086	98.9077	74.3547	61.9524
pgaptmp_003308	pgaptmp_003308	pgaptmp_003308	protein_coding	protein_coding	pgaptmp_003308	0.5027	1110				TRUE	0.574437	0.00086297	0.00933319	Chromosome_II	45276	46385	1110	+	6.60545	87.8852	65.1286	66.1633	117.872	101.727	89.0642	121.763	130.602	120.343	82.7381	79.8213	101.893	126.671	117.653	92.2218	84.2718	115.841	134.945	75.4394	81.5561	78.9242	3.2625	2.42488	2.48791	5.72073	4.73866	3.92747	5.22306	5.11287
pgaptmp_002651	pgaptmp_002651	pgaptmp_002651	protein_coding	protein_coding	pgaptmp_002651	0.4687	894	GO:0006355	GO:0003700		TRUE	0.671138	0.000869566	0.00938526	Chromosome_I	2868822	2869715	894	+	9.65725	1733.03	2253.1	2611.41	1455.46	1437.83	1627.07	2520.64	2411.29	2232.33	238.124	239.464	259.363	279.854	276.374	283.253	273.041	294.263	291.058	1465.76	1594.17	1291.03	79.8781	104.156	121.921	87.7057	83.1598	89.0844	134.248	117.206
pgaptmp_004049	pgaptmp_004049	pgaptmp_004049	protein_coding	protein_coding	pgaptmp_004049	0.4593	1230				TRUE	0.639396	0.000879711	0.00947533	Chromosome_II	817380	818609	1230	+	7.67502	235.902	271.076	296.51	335.038	335.22	335.64	423.201	367.179	420.144	110.99	114.29	124.124	159.075	118.763	126.476	80.9009	122.499	111.131	239.73	277.163	228.465	7.90288	9.1081	10.0618	14.6742	14.0919	13.3568	16.3823	12.9721
pgaptmp_002685	pgaptmp_002685	pgaptmp_002685	protein_coding	protein_coding	pgaptmp_002685	0.4557	1128				TRUE	-0.603465	0.000882346	0.00948432	Chromosome_I	2909586	2910713	1128	-	12.5609	6542.05	5974.23	6203.01	3807.14	4185.81	4169.52	4010.01	4133	3806.64	9109.27	8771.28	10217	8220.33	8519.87	9041.69	6119.82	6557.67	5956.1	5586.43	5777.74	6255.78	238.981	218.884	229.527	181.825	191.873	180.93	169.266	159.218
pgaptmp_004851	pgaptmp_004851	pgaptmp_004851	protein_coding	protein_coding	pgaptmp_004851	0.4535	699	GO:0015031		GO:0005886	TRUE	-0.913302	0.000889703	0.00953677	Chromosome_II	1775315	1776013	699	+	8.42875	262.885	238.512	306.312	479.175	591.244	477.483	364.547	470.168	363.14	332.971	350.125	277.889	190.006	218.657	198.936	257.872	195.731	214.324	667.219	630.149	912.198	15.497	14.1018	18.2906	36.9302	43.7354	33.4359	24.8318	29.2289
pgaptmp_001511	pgaptmp_001511	pgaptmp_001511	protein_coding	protein_coding	pgaptmp_001511	0.471	690	GO:0000160,GO:0006355	GO:0000156,GO:0003677		TRUE	0.663946	0.000890847	0.00953677	Chromosome_I	1563970	1564659	690	+	7.17031	221.255	255.234	245.866	201.151	182.971	108.032	184.129	236.576	227.314	127.134	134.245	96.3347	128.143	190.909	144.92	53.9339	89.2109	54.2426	128.526	124.246	136.248	13.213	15.2873	14.8727	15.705	13.7113	7.66363	12.7059	14.8991
pgaptmp_003379	pgaptmp_003379	pgaptmp_003379	protein_coding	protein_coding	pgaptmp_003379	0.463	717	GO:0006355	GO:0003677		TRUE	-0.583335	0.000895044	0.00955935	Chromosome_II	115528	116244	717	-	12.4126	2745.26	2749.49	3088.44	5683.48	4851.48	4436.72	3938.74	4109.12	4119.1	9309.05	8174.43	9148.09	6019.8	7663	7305.28	7488.39	6391.23	6704.91	5839.57	5669.43	6173.54	157.769	158.48	179.788	427.031	349.863	302.883	261.559	249.039
pgaptmp_004405	pgaptmp_004405	pgaptmp_004405	protein_coding	protein_coding	pgaptmp_004405	0.4733	1122	GO:0055085	GO:0022857	GO:0016020	TRUE	0.734479	0.000896586	0.00955935	Chromosome_II	1271630	1272751	1122	-	5.57266	60.132	54.5672	59.6287	65.3421	51.2047	66.7982	64.5938	76.1224	74.5985	40.3601	36.2824	25.9363	42.7145	36.6279	26.3491	35.3941	43.9397	46.3046	34.6462	45.2382	37.3852	2.20836	2.00993	2.21821	3.13736	2.35972	2.9141	2.74114	2.9482
pgaptmp_003195	pgaptmp_003195	pgaptmp_003195	protein_coding	protein_coding	pgaptmp_003195	0.4485	582				TRUE	0.583826	0.00090689	0.00964968	Chromosome_I	3463455	3464036	582	+	11.4588	2714.42	2672.03	2604.87	1607.93	1870.68	1635.32	2473.13	2835.19	2629.25	7182.07	6703.18	7238.07	4418.74	3418.6	3383.22	2548.38	2892.03	2427.68	1683.7	1640.68	1803.63	192.182	189.741	186.812	148.836	166.196	137.535	202.328	211.688
pgaptmp_000179	pgaptmp_000179	dusB	protein_coding	protein_coding	pgaptmp_000179	0.4757	969	GO:0008033	GO:0017150,GO:0050660		TRUE	-0.858003	0.000922014	0.00979082	Chromosome_I	191805	192773	969	-	14.3229	16643.5	15365.1	13182	12746.8	17099	10466.7	8265.78	10563.8	9974.38	49540	52439	56922.7	45507.1	43600.5	45017.4	20135.9	21971.2	18904.2	17626.5	14460.9	18535.6	707.747	655.319	567.805	708.668	912.409	528.711	406.156	473.735
pgaptmp_002167	pgaptmp_002167	pgaptmp_002167	protein_coding	protein_coding	pgaptmp_002167	0.4314	459				TRUE	0.640116	0.00093201	0.00985913	Chromosome_I	2350445	2350903	459	-	5.99417	112.555	114.415	132.327	67.9045	85.3412	83.2915	118.793	140.304	120.343	34.3061	45.353	51.8725	33.877	23.3087	19.7618	48.8776	49.2657	23.8138	79.9099	71.3616	77.2627	10.1044	10.3018	12.033	7.96985	9.61368	8.88221	12.3229	13.283
pgaptmp_002261	pgaptmp_002261	pgaptmp_002261	protein_coding	protein_coding	pgaptmp_002261	0.4794	678				TRUE	0.756369	0.00093367	0.00985913	Chromosome_I	2451733	2452410	678	-	7.8617	409.36	431.257	400.247	274.18	322.248	212.765	259.86	338.073	282.911	213.908	199.553	220.458	203.262	243.076	270.078	128.093	141.14	134.945	165.967	143.998	187.757	24.8791	26.2874	24.6399	21.7857	24.5756	15.3604	18.2491	21.668
pgaptmp_001859	pgaptmp_001859	pgaptmp_001859	protein_coding	protein_coding	pgaptmp_001859	0.4836	852				TRUE	1.25006	0.000935411	0.00985913	Chromosome_I	1989826	1990677	852	-	7.20915	844.16	543.912	378.193	442.02	534.577	315.848	282.876	545.544	418.737	54.4861	47.1672	44.4622	44.1874	52.167	55.3331	28.6524	41.2767	46.3046	144.732	149.732	203.541	40.8266	26.3834	18.5274	27.949	32.4425	18.1456	15.8085	27.8245
pgaptmp_002568	pgaptmp_002568	lipB	protein_coding	protein_coding	pgaptmp_002568	0.4585	663	GO:0009249	GO:0033819		TRUE	-0.821346	0.000938357	0.00985913	Chromosome_I	2771411	2772073	663	+	11.192	1583.48	1566.61	1382.08	1577.82	1400.28	1255.15	1123.34	1201.54	1275.21	4837.15	3922.13	4672.23	4105.01	5039.11	5118.31	3337.16	3591.07	3605.15	1935.16	1708.22	2546.35	98.4138	97.6536	87.0081	128.206	109.206	92.6645	80.6733	78.7521
pgaptmp_004754	pgaptmp_004754	folE	protein_coding	protein_coding	pgaptmp_004754	0.4664	654	GO:0046654	GO:0003934		TRUE	-0.731566	0.000938413	0.00985913	Chromosome_II	1674535	1675188	654	-	11.3729	1966.62	2264.54	2428.44	3707.84	3464.85	3715.96	2770.11	2362.78	2443.45	2583.04	2590.57	2849.28	2039.99	2480.71	2447.83	1837.12	1818.84	1807.2	4573.3	3990.52	3628.02	123.909	143.101	154.985	305.427	273.937	278.116	201.675	156.994
pgaptmp_004772	pgaptmp_004772	pgaptmp_004772	protein_coding	protein_coding	pgaptmp_004772	0.4549	543				TRUE	0.738365	0.000939678	0.00985913	Chromosome_II	1698314	1698856	543	-	4.02626	10.7929	15.8421	15.5198	22.4213	17.0682	14.844	28.9558	26.8667	26.7429	12.108	10.8847	14.8207	14.7291	18.8689	10.5396	10.1126	13.3151	13.2299	13.9703	14.6546	10.8002	0.819025	1.20574	1.19296	2.22446	1.6253	1.33809	2.53904	2.15007
pgaptmp_005312	pgaptmp_005312	pgaptmp_005312	protein_coding	protein_coding	pgaptmp_005312	0.4691	405				TRUE	-0.941305	0.000945724	0.00990284	Chromosome_II	2298147	2298551	405	+	8.69944	168.061	224.43	196.039	420.239	293.574	573.969	316.287	234.338	223.796	768.859	665.783	716.953	326.987	518.34	483.506	812.38	633.797	620.482	575.574	419.887	462.745	17.099	22.9017	20.2036	55.8992	37.4805	69.3692	37.1842	25.1434
pgaptmp_005023	pgaptmp_005023	deoD	protein_coding	protein_coding	pgaptmp_005023	0.4571	711	GO:0006139	GO:0004731		TRUE	0.767034	0.000949238	0.00991889	Chromosome_II	1980064	1980774	711	+	14.4199	24516.9	23875.8	22410.6	24977.3	24958.5	22205.9	39923.4	43518.9	39921.5	10741.8	12566.4	12349.4	16160.8	13749.9	14221.9	19316.8	18697	46931.7	20948.7	23995.3	25382	1420.87	1387.81	1315.6	1892.52	1815.07	1528.73	2673.57	2659.78
pgaptmp_002613	pgaptmp_002613	tet(34)	protein_coding	protein_coding	pgaptmp_002613	0.4516	465				TRUE	-0.894715	0.000955804	0.00991889	Chromosome_I	2821313	2821777	465	-	11.0097	1086.23	1482.12	1360.84	1855.84	1484.94	2456.69	1729.18	1137.36	1264.66	2235.95	2699.41	2552.87	1973.7	2030.07	2130.32	3824.25	4041.12	3423.9	2556	2281.02	2626.93	96.2558	131.726	122.15	215.007	165.12	258.601	177.06	106.287
pgaptmp_002297	pgaptmp_002297	udp	protein_coding	protein_coding	pgaptmp_002297	0.4585	759	GO:0009116	GO:0016763		TRUE	0.780844	0.000956729	0.00991889	Chromosome_I	2495709	2496467	759	-	13.41	29446.9	32905.8	37936.1	25384.1	17733.2	24436.6	38844.6	32769.2	32859.9	2679.91	2454.51	1982.27	1595.17	1954.6	1670.53	8767.64	6829.29	11373.7	19821	20516.5	18577.9	1598.66	1791.73	2086.18	1801.71	1208.06	1575.91	2436.81	1876.12
pgaptmp_002538	pgaptmp_002538	pgaptmp_002538	protein_coding	protein_coding		0.5	1000				TRUE	-1.00319	0.000956889	0.00991889	pgaptmp_002538	1	1000	1000	+	12.2534	1749.22	1826.24	2708.61	3169.73	2754.13	4232.2	2017.26	1878.43	1567.98	14085.7	15144.3	16760.4	8274.83	6637.42	8048.33	17597.6	12159.3	10615.7	4131.28	3796.82	2688.41	72.0781	75.4745	113.054	170.76	142.406	207.157	96.0492	81.6268
pgaptmp_003774	pgaptmp_003774	fliI	protein_coding	protein_coding	pgaptmp_003774	0.4945	1353	GO:0044780,GO:0071973	GO:0016887		TRUE	0.610408	0.000960781	0.00991889	Chromosome_II	528207	529559	1353	+	6.66229	102.533	79.2105	95.5692	81.9979	94.2167	79.1682	109.141	105.228	119.639	119.062	92.5202	107.45	139.927	112.104	122.523	119.666	115.841	161.405	68.1748	63.0786	73.9395	3.12265	2.41951	2.94823	3.26489	3.60059	2.86408	3.84082	3.37964
pgaptmp_001057	pgaptmp_001057	pgaptmp_001057	protein_coding	protein_coding	pgaptmp_001057	0.4384	609		GO:0046872		TRUE	-0.835324	0.000961047	0.00991889	Chromosome_I	1123135	1123743	609	+	11.0742	1289.75	1578.05	1623.86	1739.89	1511.56	2969.63	1611.87	1294.83	1280.84	2690	2987.86	3073.45	2137.2	1973.47	2189.61	4109.09	3728.22	3024.35	2824.23	2292.49	2130.95	87.2665	107.089	111.294	153.911	128.337	238.681	126.022	92.3915
pgaptmp_001621	pgaptmp_001621	pgaptmp_001621	protein_coding	protein_coding	pgaptmp_001621	0.3445	447				TRUE	-0.991626	0.000961965	0.00991889	Chromosome_I	1698691	1699137	447	-	6.62427	84.0306	105.614	109.455	130.684	129.036	204.518	68.3061	48.5094	72.4872	115.026	126.989	75.9562	69.2269	64.3763	90.9043	129.779	75.8958	83.3483	151.438	127.431	104.678	7.74619	9.76463	10.2205	15.75	14.9261	22.3953	7.27586	4.7158
pgaptmp_003825	pgaptmp_003825	pgaptmp_003825	protein_coding	protein_coding	pgaptmp_003825	0.4471	255				TRUE	-0.9851	0.000964215	0.00991889	Chromosome_II	589289	589543	255	-	8.81396	346.144	394.292	417.401	777.058	724.376	848.584	607.33	424.643	529.931	312.791	293.888	316.793	167.912	269.715	333.316	347.2	299.589	300.319	1197.53	1000.97	810.843	55.9339	63.9028	68.3209	164.164	146.882	162.887	113.401	72.3639
pgaptmp_001895	pgaptmp_001895	pgaptmp_001895	protein_coding	protein_coding	pgaptmp_001895	0.4592	882		GO:0051539,GO:1904047		TRUE	0.503115	0.000968143	0.00991889	Chromosome_I	2035977	2036858	882	-	9.23326	1024.56	927.643	807.029	586.157	598.754	489.853	637.771	674.653	672.794	433.871	491.627	503.905	453.657	488.372	523.029	701.141	680.4	1088.82	454.871	445.373	451.114	47.8658	43.4664	38.191	35.8022	35.1013	27.185	34.4293	33.2391
pgaptmp_001573	pgaptmp_001573	pgaptmp_001573	protein_coding	protein_coding	pgaptmp_001573	0.4336	1905				TRUE	0.54191	0.000970203	0.00991889	Chromosome_I	1635475	1637379	1905	+	9.5573	1098.56	1086.94	1126.41	906.461	966.745	888.168	1019.39	1085.86	1115.46	567.059	691.18	550.22	611.259	515.01	442.664	675.86	551.243	486.86	656.043	729.545	753.519	23.7623	23.5806	24.6798	25.6341	26.2398	22.8209	25.4788	24.7695
pgaptmp_001702	pgaptmp_001702	pgaptmp_001702	protein_coding	protein_coding	pgaptmp_001702	0.4514	2364				TRUE	0.547783	0.000972729	0.00991889	Chromosome_I	1798288	1800651	2364	+	10.5207	1817.84	2156.29	2051.88	1626.51	1628.31	1776.34	1903.66	1914.25	1738.29	1295.56	1413.2	1161.57	1440.51	1305.29	1237.09	1087.11	937.38	1427.51	1241.68	1225.25	1210.45	31.6859	37.6965	36.2281	37.0657	35.615	36.7799	38.342	35.1876
pgaptmp_005015	pgaptmp_005015	pgaptmp_005015	protein_coding	protein_coding	pgaptmp_005015	0.444	1644			GO:0098561	TRUE	-0.837478	0.000974655	0.00991889	Chromosome_II	1970963	1972606	1644	+	10.573	1768.5	1732.95	1458.86	1102.49	918.954	613.553	840.462	987.352	1080.27	2831.26	2771.98	3308.73	1409.58	2054.49	1905.04	1378.69	1396.75	2136.63	1552.93	1448.26	2057.85	44.3262	43.5638	37.0384	36.1273	28.9025	18.2677	24.3416	26.098
pgaptmp_002014	pgaptmp_002014	pgaptmp_002014	protein_coding	protein_coding	pgaptmp_002014	0.4653	1743				TRUE	1.24033	0.000975014	0.00991889	Chromosome_I	2180168	2181910	1743	-	9.00131	1734.58	1218.96	1058.61	633.562	731.203	352.133	935.496	1285.12	1278.73	157.404	183.226	181.554	266.597	279.704	312.237	340.458	303.583	1109.99	319.081	482.328	628.071	41.0066	28.9024	25.3502	19.5819	21.6913	9.88878	25.5551	32.0395
pgaptmp_003566	pgaptmp_003566	pgaptmp_003566	protein_coding	protein_coding	pgaptmp_003566	0.4809	732				TRUE	0.664056	0.000975482	0.00991889	Chromosome_II	318531	319262	732	-	8.42966	370.814	384.611	396.163	557.97	560.521	402.438	578.374	657.488	705.871	163.458	215.88	150.06	259.233	235.307	274.03	301.693	229.019	259.306	343.668	435.178	402.098	20.8739	21.7146	22.5893	41.0643	39.5936	26.9105	37.621	39.0314
pgaptmp_002302	pgaptmp_002302	fdxA	protein_coding	protein_coding	pgaptmp_002302	0.4599	324		GO:0009055,GO:0051539		TRUE	-0.947806	0.000975937	0.00991889	Chromosome_I	2503310	2503633	324	+	8.60507	275.99	335.325	292.425	342.726	300.401	602.833	290.301	173.887	219.573	569.077	513.396	731.773	400.633	400.687	347.808	588.217	533.934	420.711	461.577	407.144	427.852	35.1	42.7722	37.6713	56.9857	47.9402	91.0719	42.6615	23.3217
pgaptmp_004340	pgaptmp_004340	pgaptmp_004340	protein_coding	protein_coding	pgaptmp_004340	0.4505	2457			GO:0016020	TRUE	0.495636	0.000977388	0.00991889	Chromosome_II	1198273	1200729	2457	+	8.87161	328.413	392.532	380.643	486.222	499.758	493.976	557.585	585.098	578.49	480.285	480.742	442.769	623.042	606.025	567.823	399.448	426.082	461.723	388.373	395.038	393.79	5.50774	6.60255	6.46627	10.6609	10.5172	9.84088	10.8054	10.3481
pgaptmp_000039	pgaptmp_000039	pgaptmp_000039	protein_coding	protein_coding	pgaptmp_000039	0.4724	1194	GO:0055085	GO:0022857		TRUE	-0.592657	0.000984215	0.0099634	Chromosome_I	42974	44167	1194	+	10.2188	996.032	1140.63	1152.55	1142.21	1065.06	1458.01	1120.37	1006.76	993.005	843.525	1026.79	1055.98	935.3	955.655	1050.01	1663.52	1552.54	1924.95	1585.34	1564.86	1418.14	34.3738	39.4805	40.2899	51.5352	46.1225	59.771	44.6775	36.6402
pgaptmp_005266	pgaptmp_005266	pgaptmp_005266	protein_coding	protein_coding	pgaptmp_005266	0.4711	537				TRUE	0.53681	0.000985558	0.0099634	Chromosome_II	2251836	2252372	537	+	8.37609	382.378	381.091	405.965	504.159	473.814	413.984	558.328	629.129	593.973	191.71	224.951	213.048	220.937	256.395	259.538	205.623	210.378	190.51	378.314	413.515	392.129	29.3411	29.3289	31.5541	50.5775	45.6224	37.7348	49.5049	50.91
pgaptmp_001586	pgaptmp_001586	pgaptmp_001586	protein_coding	protein_coding	pgaptmp_001586	0.4353	1167				TRUE	-0.524629	0.00100055	0.0100863	Chromosome_I	1654167	1655333	1167	+	7.46382	184.251	220.029	267.921	276.743	234.176	258.946	305.15	279.115	284.319	90.8102	87.0778	74.1036	100.158	103.224	73.7774	112.924	89.2109	99.2242	400.667	423.71	395.452	6.50573	7.79204	9.58244	12.7753	10.3757	10.861	12.4502	10.3932
pgaptmp_000520	pgaptmp_000520	endA	protein_coding	protein_coding	pgaptmp_000520	0.4856	696		GO:0004518		TRUE	-0.583534	0.00100244	0.0100863	Chromosome_I	528479	529174	696	-	10.7061	1378.41	1505	1365.74	971.163	964.697	771.89	956.285	939.589	1026.08	2401.42	2066.28	2206.44	3512.9	4010.2	4139.44	2108.48	2625.73	2500.45	1285.26	1393.46	1579.32	81.607	89.3653	81.9031	75.1704	71.668	54.2849	65.42	58.6632
pgaptmp_000642	pgaptmp_000642	pgaptmp_000642	protein_coding	protein_coding	pgaptmp_000642	0.4603	1032		GO:0005524,GO:0016887,GO:0042626,GO:0140359		TRUE	-0.546182	0.00100346	0.0100863	Chromosome_I	655162	656193	1032	+	11.2514	2398.34	2400.96	2615.49	2134.51	2219.55	2225.78	1954.89	1975.45	1858.63	2524.52	2532.51	2599.19	2551.09	2193.23	2442.56	3045.58	3033.17	2720.07	2577.79	2816.87	2812.2	95.7612	96.1494	105.783	111.425	111.206	105.569	90.1935	83.1809
pgaptmp_002803	pgaptmp_002803	pgaptmp_002803	protein_coding	protein_coding	pgaptmp_002803	0.4617	483				TRUE	0.732329	0.0010089	0.0101217	Chromosome_I	3037160	3037642	483	-	10.7469	3570.91	5071.23	4992.47	5308.72	4641.19	4865.54	6803.88	5999.49	5871.47	439.925	424.504	533.546	396.214	379.598	418.95	525.856	474.016	443.201	3970.35	3735.02	3170.26	304.642	433.918	431.429	592.117	496.851	493.08	670.721	539.765
pgaptmp_002247	pgaptmp_002247	infA	protein_coding	protein_coding	pgaptmp_002247	0.4475	219	GO:0006413	GO:0003743		TRUE	-1.58576	0.00101347	0.0101295	Chromosome_I	2434794	2435012	219	+	13.5654	4541.51	5682.03	5798.68	8272.82	9275.56	14267.6	5698.36	3330.73	3686.29	39823.3	41213.2	34649	12591.9	16798.9	15307.5	35218.9	22278.8	20765.6	17458.9	10018.7	9440.17	854.504	1072.26	1105.16	2035.04	2189.98	3188.89	1238.91	660.895
pgaptmp_003617	pgaptmp_003617	emrD	protein_coding	protein_coding	pgaptmp_003617	0.4925	1206	GO:0042908	GO:0042910	GO:0016020	TRUE	-0.671642	0.00101597	0.0101295	Chromosome_II	366395	367600	1206	-	11.3569	883.477	1038.54	1103.54	1335.03	1637.87	2299.18	1441.11	1141.84	1126.02	5349.73	6284.12	6493.33	5364.35	4407.56	5292.21	7860.87	7280.67	5966.68	1913.37	1892.99	1933.23	30.1861	35.5891	38.1928	59.6358	70.2224	93.3163	56.8961	41.1428
pgaptmp_002136	pgaptmp_002136	pgaptmp_002136	protein_coding	protein_coding	pgaptmp_002136	0.4707	837				TRUE	-0.646422	0.00101729	0.0101295	Chromosome_I	2321612	2322448	837	+	7.08068	110.242	137.298	151.114	170.402	173.413	161.635	105.429	123.139	96.4151	119.062	132.431	103.745	107.523	104.334	130.428	173.6	153.123	119.069	169.878	161.201	173.633	5.42725	6.77924	7.53563	10.9676	10.7127	9.45242	5.99746	6.39305
pgaptmp_004292	pgaptmp_004292	pgaptmp_004292	protein_coding	protein_coding	pgaptmp_004292	0.4523	639				TRUE	-0.554254	0.00101738	0.0101295	Chromosome_II	1143921	1144559	639	-	8.9218	290.638	315.082	304.678	642.53	603.533	599.534	414.291	411.956	374.4	615.491	538.794	503.905	459.549	559.408	503.267	541.025	535.265	494.798	594.574	580.45	542.5	18.7417	20.3781	19.9013	54.1698	48.8364	45.9246	30.8701	28.0148
pgaptmp_001647	pgaptmp_001647	pgaptmp_001647	protein_coding	protein_coding	pgaptmp_001647	0.4484	1104				TRUE	0.747576	0.00102326	0.0101689	Chromosome_I	1720083	1721186	1104	-	7.34974	379.294	371.409	413.316	258.806	275.823	222.661	272.482	300.758	344.138	100.9	68.9366	68.5459	85.429	59.9366	89.5869	112.924	105.189	71.4414	163.731	203.253	153.695	14.1568	13.9035	15.6262	12.629	12.9183	9.87204	11.7517	11.8382
pgaptmp_002040	pgaptmp_002040	tet(35)	protein_coding	protein_coding	pgaptmp_002040	0.4444	1602				TRUE	-0.93656	0.00102888	0.0101991	Chromosome_I	2205503	2207104	1602	-	13.0623	5058.02	5882.7	6746.21	6406.73	7176.85	9577.7	5278.13	4614.36	4329.53	12749.7	14059.4	14239	12924.8	11440.1	12892.6	10916.6	11265.9	10304.8	10295.5	9113.26	6946.99	130.1	151.76	175.767	215.446	231.641	292.639	156.874	125.166
pgaptmp_000979	pgaptmp_000979	pgaptmp_000979	protein_coding	protein_coding	pgaptmp_000979	0.468	297				TRUE	-0.945898	0.00103017	0.0101991	Chromosome_I	1034854	1035150	297	-	6.94574	159.581	163.702	88.2177	180.011	131.084	91.5382	100.232	90.302	115.417	86.7742	117.918	120.418	86.9019	176.48	126.476	70.7883	97.1999	109.808	197.26	149.095	245.081	22.1403	22.7792	12.3977	32.6518	22.8211	15.0862	16.0687	13.2123
pgaptmp_003792	pgaptmp_003792	pgaptmp_003792	protein_coding	protein_coding	pgaptmp_003792	0.4468	1401				TRUE	0.612709	0.00103215	0.0101995	Chromosome_II	546292	547692	1401	+	9.18297	1524.89	1347.46	1264.45	568.22	606.264	481.606	710.532	834.361	765.69	304.719	373.709	316.793	437.455	410.676	420.268	503.945	451.38	784.533	436.431	532.664	489.33	44.8495	39.7483	37.6709	21.8495	22.3752	16.8262	24.1478	25.8793
pgaptmp_004522	pgaptmp_004522	pgaptmp_004522	protein_coding	protein_coding	pgaptmp_004522	0.4615	1560			GO:0098561	TRUE	0.726654	0.0010396	0.0102539	Chromosome_II	1398508	1400067	1560	-	7.53902	198.898	170.743	154.381	228.697	204.136	156.687	204.176	272.399	263.206	272.43	273.932	188.964	145.818	170.93	106.714	207.309	183.748	178.604	129.644	137.626	158.679	5.25369	4.52334	4.13057	7.8977	6.76611	4.91633	6.23178	7.58784
pgaptmp_001962	pgaptmp_001962	pgaptmp_001962	protein_coding	protein_coding	pgaptmp_001962	0.4637	1296				TRUE	-0.805706	0.001045	0.0102771	Chromosome_I	2122113	2123408	1296	-	7.11621	131.828	134.658	167.45	121.716	111.285	131.947	126.218	111.945	127.38	92.8282	110.661	116.713	181.168	142.072	140.968	170.229	103.857	124.361	254.259	201.342	176.956	4.19141	4.29406	5.39289	5.05948	4.43992	4.98342	4.63712	3.7535
pgaptmp_002544	pgaptmp_002544	pgaptmp_002544	protein_coding	protein_coding		0.5	1000				TRUE	-1.01499	0.00104586	0.0102771	pgaptmp_002544	1	1000	1000	+	12.6545	2265.74	2335.83	3877.5	3955.76	3338.55	4805.34	2705.51	2395.62	2136.61	20674.4	21950.9	23283.4	9011.29	9364.53	10849.2	24128.7	16822.2	14022.4	5684.22	4927.77	3556.58	93.3617	96.5346	161.842	213.105	172.624	235.211	128.82	104.101
pgaptmp_004018	pgaptmp_004018	pgaptmp_004018	protein_coding	protein_coding	pgaptmp_004018	0.4671	456				TRUE	1.02336	0.00106076	0.0103723	Chromosome_II	785622	786077	456	-	10.8671	2534.79	2405.36	2025.74	2319.64	2552.73	1671.6	2332.06	3724.03	3365.38	2342.9	2191.46	2291.66	1609.89	1652.7	1749.58	766.873	913.413	1104.7	1271.29	1435.52	1782.86	229.053	218	185.421	274.044	289.456	179.433	243.505	354.883
pgaptmp_002848	pgaptmp_002848	pgaptmp_002848	protein_coding	protein_coding	pgaptmp_002848	0.419	642				TRUE	-0.557479	0.00106128	0.0103723	Chromosome_I	3096571	3097212	642	+	11.5041	2071.47	2267.18	2436.61	2389.47	2373.17	2320.62	1931.13	1890.37	1907.19	3684.87	3767.93	4073.85	3942.99	3591.75	3986.62	4759.67	4146.31	3946.48	2845.46	2767.81	2562.96	132.954	145.946	158.413	200.508	191.134	176.93	143.222	127.953
pgaptmp_004443	pgaptmp_004443	pgaptmp_004443	protein_coding	protein_coding		0.5	1000				TRUE	-1.33341	0.00106146	0.0103723	pgaptmp_004443	1	1000	1000	+	7.48896	100.22	140.819	117.624	383.084	271.726	356.257	211.6	144.782	162.568	300.683	128.803	257.51	70.6999	106.554	106.714	141.577	82.5534	93.9322	535.899	482.328	274.989	4.12964	5.81972	4.90948	20.6376	14.05	17.438	10.0751	6.29146
pgaptmp_004491	pgaptmp_004491	pgaptmp_004491	protein_coding	protein_coding	pgaptmp_004491	0.3667	180				TRUE	0.696299	0.00106439	0.0103817	Chromosome_II	1367296	1367475	180	+	7.20592	182.709	251.713	250.767	313.258	291.525	282.861	286.589	291.056	318.803	88.7922	68.9366	74.1036	69.2269	55.4968	71.1425	107.868	91.8739	58.2115	183.849	196.244	147.048	41.8259	57.793	58.1486	93.7548	83.7429	76.919	75.8087	70.2654
pgaptmp_000817	pgaptmp_000817	pgaptmp_000817	protein_coding	protein_coding	pgaptmp_000817	0.4508	315				TRUE	-0.777615	0.00107075	0.0104245	Chromosome_I	861796	862110	315	+	8.36008	334.58	315.962	347.153	335.038	316.786	253.998	256.89	204.486	272.355	343.061	324.728	305.678	228.302	365.169	374.157	431.471	395.457	378.375	372.726	375.286	487.669	43.7671	41.4539	45.9993	57.2991	51.9996	39.4687	38.8302	28.2091
pgaptmp_000281	pgaptmp_000281	kefB	protein_coding	protein_coding	pgaptmp_000281	0.5019	1797	GO:0006813	GO:0015503		TRUE	0.611138	0.00107763	0.0104721	Chromosome_I	296493	298289	1797	+	10.6431	1353.74	1375.62	1587.92	1119.78	1220.04	1134.74	1501.99	1723.95	1682.69	1255.2	1467.62	1465.4	3455.46	2385.25	2702.1	1978.7	2452.63	2935.71	921.478	1126.49	1061.74	31.0417	31.6368	36.8826	33.5699	35.105	30.9088	39.7972	41.6882
pgaptmp_002564	pgaptmp_002564	rodA	protein_coding	protein_coding	pgaptmp_002564	0.4643	1122	GO:0008360		GO:0016020	TRUE	-0.51842	0.00108616	0.0105356	Chromosome_I	2767630	2768751	1122	+	10.9755	1644.38	1637.02	1822.35	1425.99	1736.86	1415.96	1314.89	1358.26	1335.03	2881.71	3279.93	2966	2665.97	2687.16	3057.81	2519.73	2449.97	2401.23	1831.22	1783.4	1960.64	60.3903	60.2979	67.7922	68.4683	80.0418	61.7717	55.7995	52.6051
pgaptmp_004857	pgaptmp_004857	pgaptmp_004857	protein_coding	protein_coding	pgaptmp_004857	0.4768	948				TRUE	0.637152	0.00109668	0.010618	Chromosome_II	1781826	1782773	948	+	6.70461	121.806	126.737	115.99	162.715	161.124	117.928	155.174	198.515	187.2	70.6301	83.4496	72.251	72.1728	95.4545	81.6821	53.9339	62.5808	56.8885	110.086	105.131	114.648	5.29441	5.52505	5.10685	9.24661	8.78812	6.08892	7.79367	9.09961
pgaptmp_000992	pgaptmp_000992	ansA	protein_coding	protein_coding	pgaptmp_000992	0.4753	1014	GO:0006520	GO:0004067		TRUE	-0.663659	0.00110186	0.0106347	Chromosome_I	1049474	1050487	1014	-	11.4366	3022.02	3032	2787.03	2482.36	2642.16	1677.38	1915.54	2277.7	2234.44	3004.81	3258.16	2834.46	2602.64	2999.05	3356.87	3013.56	2937.3	3160.62	3039.37	3116.34	3734.36	122.805	123.576	114.721	131.884	134.73	80.9702	89.9469	97.6104
pgaptmp_004136	pgaptmp_004136	cqsA	protein_coding	protein_coding	pgaptmp_004136	0.4543	1182		GO:0030170		TRUE	0.962032	0.00110244	0.0106347	Chromosome_II	952878	954059	1182	-	8.46062	493.391	410.134	412.5	504.8	545.501	296.881	429.14	581.366	632.68	334.989	353.754	209.343	326.987	322.991	222.65	342.143	328.882	215.647	208.995	287.358	313.205	17.2001	14.34	14.5662	23.0073	23.8628	12.2941	17.2868	21.3732
pgaptmp_002252	pgaptmp_002252	pgaptmp_002252	protein_coding	protein_coding	pgaptmp_002252	0.4496	705	GO:0001522,GO:0009451	GO:0003723,GO:0009982,GO:0016866		TRUE	-0.542028	0.00110728	0.0106618	Chromosome_I	2441656	2442360	705	+	9.83445	841.848	974.289	1057.8	1004.47	928.512	1002.8	752.852	653.757	696.018	1029.18	1115.68	954.084	876.384	964.535	897.186	886.539	893.44	809.669	1015.36	993.965	966.199	49.2042	57.1137	62.6259	76.7563	68.0992	69.6236	50.8456	40.2962
pgaptmp_001946	pgaptmp_001946	nhaA	protein_coding	protein_coding	pgaptmp_001946	0.4728	1176	GO:0006814,GO:0006885	GO:0015385	GO:0016020	TRUE	0.705456	0.00110973	0.0106659	Chromosome_I	2100499	2101674	1176	-	11.8552	1941.18	2240.78	2525.64	1536.82	1332.69	1976.73	2136.05	2012.77	1819.92	10061.8	10331.4	10972.9	12471.2	10981.7	11907.1	8732.24	9945.02	9628.71	1328.29	1173.64	1033.49	68.017	78.7468	89.6407	70.4012	58.5956	82.276	86.4842	74.3744
pgaptmp_003489	pgaptmp_003489	pgaptmp_003489	protein_coding	protein_coding	pgaptmp_003489	0.4694	1389	GO:0034219	GO:0015288	GO:0016020	TRUE	0.678067	0.00111291	0.010677	Chromosome_II	236676	238064	1389	+	6.71119	70.154	104.734	112.723	124.278	120.843	145.966	191.554	141.05	162.568	72.6481	94.3343	96.3347	98.6852	76.5856	102.761	91.0135	67.9068	92.6092	96.1153	98.1222	98.0322	2.08117	3.11621	3.38727	4.8201	4.49846	5.14379	6.56631	4.41275
pgaptmp_005175	pgaptmp_005175	pgaptmp_005175	protein_coding	protein_coding	pgaptmp_005175	0.457	453				TRUE	0.630176	0.00111742	0.0107008	Chromosome_II	2142237	2142689	453	+	5.66282	42.4008	44.0058	41.6584	62.7796	64.1766	43.7074	69.791	62.689	66.8572	54.4861	45.353	35.1992	63.3353	64.3763	63.2378	35.3941	46.6027	46.3046	41.9108	35.6808	39.8775	3.85686	4.01471	3.83835	7.46595	7.32525	4.72269	7.33557	6.01355
pgaptmp_002572	pgaptmp_002572	pgaptmp_002572	protein_coding	protein_coding	pgaptmp_002572	0.4388	1527				TRUE	-0.531465	0.00112348	0.0107393	Chromosome_I	2776090	2777616	1527	+	9.60804	834.909	899.479	912.4	947.46	852.046	776.838	679.348	666.444	685.462	928.282	667.597	733.626	705.526	956.765	797.06	566.306	536.597	627.097	957.242	874.817	1023.52	22.5299	24.3441	24.9395	33.4261	28.8515	24.9014	21.1829	18.9654
pgaptmp_004852	pgaptmp_004852	pgaptmp_004852	protein_coding	protein_coding	pgaptmp_004852	0.4517	414		GO:0022857	GO:0016020	TRUE	-1.31611	0.00112886	0.0107597	Chromosome_II	1776010	1776423	414	+	7.48242	118.722	80.9708	104.554	241.509	290.16	178.953	110.626	162.693	158.346	228.034	337.427	214.901	151.71	133.192	139.65	160.116	119.836	134.945	280.523	279.075	517.577	11.8165	8.08294	10.541	31.4266	36.2394	21.1579	12.723	17.0768
pgaptmp_004612	pgaptmp_004612	pgaptmp_004612	protein_coding	protein_coding	pgaptmp_004612	0.4177	2691		GO:0005524,GO:0016887		TRUE	1.15457	0.0011297	0.0107597	Chromosome_II	1512537	1515227	2691	-	10.9486	3969.48	3686.81	3147.25	4024.3	4161.24	2408.86	4361.19	6170.39	5709.6	853.615	792.771	713.248	979.488	1096.62	786.52	1044.97	1111.81	989.596	1689.28	2312.88	3078.88	60.7825	56.6211	48.8156	80.564	79.9563	43.8157	77.1657	99.6406
pgaptmp_002031	pgaptmp_002031	pgaptmp_002031	protein_coding	protein_coding	pgaptmp_002031	0.462	513				TRUE	-0.631835	0.00113404	0.0107756	Chromosome_I	2197168	2197680	513	+	9.7502	949.777	1015.65	996.534	966.678	1067.11	1048.98	745.427	614.203	669.979	831.417	838.124	818.845	1103.21	1148.78	1126.42	471.922	645.78	508.028	1115.94	958.922	981.984	76.2891	81.8221	81.0803	101.515	107.556	100.088	69.1864	52.0274
pgaptmp_002316	pgaptmp_002316	pgaptmp_002316	protein_coding	protein_coding	pgaptmp_002316	0.4545	198				TRUE	-1.03854	0.00113546	0.0107756	Chromosome_I	2519896	2520093	198	-	7.74108	225.88	259.634	276.906	257.525	237.59	286.985	168.538	135.826	151.308	195.746	159.643	188.964	126.671	175.37	185.761	249.444	198.394	240.784	398.99	295.004	230.957	47.008	54.1925	58.3724	70.0677	62.045	70.9457	40.5289	29.8096
pgaptmp_001738	pgaptmp_001738	pgaptmp_001738	protein_coding	protein_coding	pgaptmp_001738	0.4082	267				TRUE	-0.845357	0.00114035	0.0108026	Chromosome_I	1838326	1838592	267	+	8.83966	218.171	199.787	191.955	310.055	257.389	418.932	225.707	168.663	185.089	1372.24	1168.29	1443.17	580.328	684.831	690.346	1447.79	960.016	1065.01	338.639	280.349	407.914	33.6701	30.9241	30.0075	62.5592	49.8451	76.8006	40.2501	27.4503
pgaptmp_005313	pgaptmp_005313	pgaptmp_005313	protein_coding	protein_coding	pgaptmp_005313	0.4612	798		GO:0016787		TRUE	-0.579903	0.00114951	0.01086	Chromosome_II	2298639	2299436	798	-	10.0716	785.57	822.029	867.474	1613.69	1444.66	1481.1	1103.29	941.828	1147.13	992.858	883.477	926.295	849.871	902.378	939.345	984.294	979.988	953.875	1473.58	1566.77	1595.1	40.564	42.5722	45.3727	108.939	93.6063	90.8481	65.8294	51.2869
pgaptmp_004219	pgaptmp_004219	pgaptmp_004219	protein_coding	protein_coding	pgaptmp_004219	0.3979	480				TRUE	-0.793654	0.00115053	0.01086	Chromosome_II	1069217	1069696	480	-	8.70757	358.479	441.819	425.569	620.109	552.328	635.819	454.384	377.627	460.259	429.835	475.3	422.391	263.652	338.531	324.094	215.736	237.008	190.51	858.891	706.607	615.609	30.7738	38.0403	37.0058	69.5971	59.4976	64.8374	45.0728	34.1868
pgaptmp_002240	pgaptmp_002240	glgC	protein_coding	protein_coding	pgaptmp_002240	0.4483	1218	GO:0005978	GO:0008878		TRUE	0.581282	0.00116937	0.011018	Chromosome_I	2425994	2427211	1218	-	9.33315	1168.72	973.409	929.554	655.983	774.215	620.151	705.334	838.092	799.471	532.753	585.961	500.2	537.614	500.581	438.712	712.939	581.868	632.389	467.165	494.434	550.808	39.5386	33.0286	31.8543	29.0141	32.8669	24.922	27.5728	29.9008
pgaptmp_002309	pgaptmp_002309	pgaptmp_002309	protein_coding	protein_coding	pgaptmp_002309	0.4368	435				TRUE	-0.994137	0.00118101	0.0111078	Chromosome_I	2512012	2512446	435	-	10.8352	1197.24	1375.62	1498.07	1518.24	1486.98	2587.81	1251.04	956.754	1039.45	1989.75	2060.84	1898.91	1604	1629.39	1928.75	4709.11	3885.33	2776.95	2638.7	1967.54	1667.38	113.41	130.693	143.742	188.025	176.751	291.19	136.935	95.5759
pgaptmp_004128	pgaptmp_004128	pgaptmp_004128	protein_coding	protein_coding	pgaptmp_004128	0.4286	357				TRUE	1.0873	0.00119462	0.0111981	Chromosome_II	942904	943260	357	+	9.48549	807.156	1057.02	1330.62	1463.79	1235.74	2151.56	3581.61	2707.57	2470.2	278.484	197.739	246.395	159.075	172.04	202.888	488.776	316.898	322.809	1595.96	1380.08	1000.26	93.1639	122.365	155.57	220.889	178.979	294.997	477.687	329.571
pgaptmp_002289	pgaptmp_002289	ycfP	protein_coding	protein_coding	pgaptmp_002289	0.4259	540				TRUE	0.867641	0.00119486	0.0111981	Chromosome_I	2487506	2488045	540	-	11.2043	6323.11	7238.08	7709.25	4872.47	3979.63	5381.79	8744.66	6578.62	6810.98	617.509	671.225	628.028	478.697	630.444	635.013	1375.32	1025.26	1117.93	4526.92	3761.14	3444.42	482.498	553.951	595.881	486.093	381.06	487.827	771.049	529.393
pgaptmp_002342	pgaptmp_002342	rrtA	protein_coding	protein_coding	pgaptmp_002342	0.4493	552	GO:0006605,GO:0036211	GO:0004252	GO:0005886	TRUE	-0.693102	0.0012012	0.011211	Chromosome_I	2545331	2545882	552	+	8.96785	410.902	468.222	541.559	504.159	509.316	617.677	377.168	300.758	332.174	589.257	680.296	515.02	571.491	459.514	558.6	620.24	584.531	465.692	602.397	495.708	495.146	30.6731	35.0554	40.9494	49.2031	47.7081	54.7715	32.5334	23.6764
pgaptmp_004854	pgaptmp_004854	pgaptmp_004854	protein_coding	protein_coding	pgaptmp_004854	0.4798	1038		GO:0042626,GO:0140359		TRUE	-0.936256	0.00120238	0.011211	Chromosome_II	1777329	1778366	1038	+	9.2802	399.338	320.363	379.826	770.011	966.745	624.274	398.7	547.783	520.782	803.165	1086.66	789.204	516.993	490.592	494.045	610.128	688.389	658.849	732.041	869.083	1145.65	15.8526	12.7552	15.2732	39.9636	48.1569	29.4382	18.2886	22.9323
pgaptmp_004390	pgaptmp_004390	pgaptmp_004390	protein_coding	protein_coding	pgaptmp_004390	0.449	294	GO:0006355	GO:0003700		TRUE	0.847792	0.00120262	0.011211	Chromosome_II	1254678	1254971	294	-	4.98064	6.16738	8.80117	16.3366	23.7025	19.1164	9.07135	31.9257	24.6278	40.1143	62.5581	85.2637	59.2829	54.4978	49.9471	46.1109	101.126	99.8629	87.3173	13.9703	13.3803	15.7848	0.864394	1.23718	2.31929	4.34322	3.36204	1.51028	5.17041	3.64012
pgaptmp_005225	pgaptmp_005225	glgB	protein_coding	protein_coding	pgaptmp_005225	0.4926	2229	GO:0005975,GO:0005978	GO:0003844,GO:0004553,GO:0043169		TRUE	1.00074	0.00120868	0.0112475	Chromosome_II	2196316	2198544	2229	-	8.99773	642.179	499.026	394.529	588.079	623.332	492.327	759.534	1009.74	984.56	266.376	468.043	316.793	452.185	340.75	379.427	417.988	483.337	1119.25	331.374	430.081	566.593	11.8715	9.25241	7.38771	14.2131	14.4595	10.8113	16.2244	19.6851
pgaptmp_001903	pgaptmp_001903	pgaptmp_001903	protein_coding	protein_coding	pgaptmp_001903	0.4708	480		GO:0016747		TRUE	0.839779	0.00122342	0.0113646	Chromosome_I	2046475	2046954	480	-	7.29266	338.435	332.684	343.886	295.321	333.172	197.92	375.683	366.432	404.662	82.7381	58.0519	57.4303	73.6457	55.4968	98.809	70.7883	66.5753	59.5345	149.761	230.651	233.45	29.0531	28.6439	29.9029	33.1449	35.8898	20.1828	37.2661	33.1734
pgaptmp_001818	pgaptmp_001818	pgaptmp_001818	protein_coding	protein_coding	pgaptmp_001818	0.4386	399		GO:0046872		TRUE	0.883131	0.00122733	0.0113793	Chromosome_I	1947287	1947685	399	-	8.24406	1177.97	1300.81	1360.02	945.538	758.512	1038.26	1579.21	980.635	1182.32	48.4321	43.5389	44.4622	50.0791	58.8266	46.1109	101.126	125.162	87.3173	680.631	649.9	625.578	121.652	134.736	142.27	127.665	98.2955	127.369	188.451	106.8
pgaptmp_001239	pgaptmp_001239	cosR	protein_coding	protein_coding	pgaptmp_001239	0.4633	477				TRUE	-0.496318	0.00122932	0.0113793	Chromosome_I	1321806	1322282	477	-	9.44782	724.667	773.623	817.648	727.091	628.794	724.059	602.875	586.59	564.415	726.481	674.853	820.698	630.407	630.444	725.917	621.926	652.438	701.184	820.892	781.792	803.366	62.6006	67.0274	71.5466	82.1173	68.1607	74.2999	60.1786	53.4384
pgaptmp_002620	pgaptmp_002620	pgaptmp_002620	protein_coding	protein_coding	pgaptmp_002620	0.462	303				TRUE	-1.13275	0.00123642	0.011424	Chromosome_I	2831072	2831374	303	-	10.9279	991.407	1388.82	1174.6	1361.93	1220.72	2468.23	1264.4	660.474	855.772	4052.15	3677.22	4801.92	2312.47	2034.51	2192.24	4390.56	3153.01	3204.28	2125.71	1807.62	1998.86	134.824	189.429	161.804	242.146	208.313	398.728	198.69	94.7219
pgaptmp_001371	pgaptmp_001371	pgaptmp_001371	protein_coding	protein_coding	pgaptmp_001371	0.4331	411				TRUE	0.68004	0.00124027	0.011424	Chromosome_I	1436971	1437381	411	+	7.34267	208.149	198.026	236.881	202.432	192.53	183.901	184.129	244.039	191.423	135.206	154.2	122.271	119.306	155.391	115.936	151.689	183.748	136.268	124.056	124.883	117.971	20.8685	19.9124	24.0563	26.534	24.2214	21.9016	21.3311	25.8021
pgaptmp_003177	pgaptmp_003177	pgaptmp_003177	protein_coding	protein_coding	pgaptmp_003177	0.4789	1353	GO:0006468	GO:0004674,GO:0005524		TRUE	-0.634237	0.00124066	0.011424	Chromosome_I	3443532	3444884	1353	+	10.2568	1543.39	1492.68	1318.36	848.166	843.854	611.904	707.562	785.852	831.844	1594.22	1763.33	1580.26	1821.99	2246.51	2132.96	1011.26	1338.16	1332.25	1128.8	1045.58	1337.56	47.0041	45.5942	40.6704	33.7713	32.2488	22.137	24.9	25.2395
pgaptmp_003675	pgaptmp_003675	pgaptmp_003675	protein_coding	protein_coding	pgaptmp_003675	0.4595	1260		GO:0016788		TRUE	0.604438	0.00125113	0.0114867	Chromosome_II	430317	431576	1260	-	7.16613	181.938	171.623	199.307	221.01	198.674	149.265	209.373	186.574	230.129	123.098	101.591	98.1873	89.8477	115.433	72.46	114.61	141.14	141.56	127.968	140.812	122.956	5.94991	5.62919	6.60226	9.44943	8.15295	5.79856	7.91194	6.43456
pgaptmp_001619	pgaptmp_001619	pgaptmp_001619	protein_coding	protein_coding	pgaptmp_001619	0.4169	981		GO:0003677,GO:0003700		TRUE	-0.608958	0.00125182	0.0114867	Chromosome_I	1696141	1697121	981	+	8.93143	951.319	1023.58	1050.44	671.998	525.702	532.736	505.613	426.136	553.859	318.845	293.888	259.363	251.868	276.374	283.253	417.988	435.402	346.623	751.6	724.448	729.426	39.9591	43.1214	44.6936	36.9032	27.7086	26.5813	24.5404	18.8763
pgaptmp_003931	pgaptmp_003931	pgaptmp_003931	protein_coding	protein_coding	pgaptmp_003931	0.4236	609				TRUE	-1.0671	0.00125927	0.011535	Chromosome_II	701919	702527	609	-	10.0651	496.474	593.199	697.574	1210.11	1208.43	1900.04	896.146	720.177	735.429	1309.68	1155.6	1320.9	799.792	869.08	992.043	1528.69	1552.54	1248.9	2072.07	1522.17	1189.68	33.5921	40.2554	47.8094	107.046	102.6	152.713	70.0639	51.3878
pgaptmp_004376	pgaptmp_004376	modB	protein_coding	protein_coding	pgaptmp_004376	0.4435	690	GO:0015689	GO:0015098	GO:0016020	TRUE	0.728164	0.00126663	0.0115822	Chromosome_II	1241031	1241720	690	-	9.94049	1324.45	1473.32	1460.49	1754.63	1789.43	1556.97	2080.37	2541.14	2088.76	508.537	536.98	548.367	608.313	471.723	409.728	466.866	451.38	539.78	1091.36	1430.42	1402.36	79.0939	88.2446	88.3469	136.993	134.094	110.45	143.557	160.036
pgaptmp_000931	pgaptmp_000931	pgaptmp_000931	protein_coding	protein_coding	pgaptmp_000931	0.4388	1251				TRUE	-1.03285	0.00127543	0.0116425	Chromosome_I	977094	978344	1251	-	14.5891	30482.3	35195.9	37484.4	38248.8	39763.5	51104.7	28183.7	24048.7	24197.4	6681.61	7924.08	6771.22	8500.18	9006.02	13145.6	43204.5	37226.2	46485.9	63797.7	45781	41682	1004.03	1162.72	1250.64	1647.12	1643.51	1999.57	1072.69	835.356
pgaptmp_002944	pgaptmp_002944	ppa	protein_coding	protein_coding	pgaptmp_002944	0.4557	531	GO:0006796	GO:0004427		TRUE	0.595756	0.00128447	0.0117046	Chromosome_I	3203719	3204249	531	+	9.42995	691.518	914.441	900.964	867.384	979.717	1166.08	1111.46	1008.25	1092.23	474.231	460.787	335.319	574.436	500.581	546.743	493.833	585.863	545.071	752.717	678.573	618.932	53.662	71.171	70.8197	87.9997	95.4003	107.49	99.6624	82.5107
pgaptmp_001307	pgaptmp_001307	pgaptmp_001307	protein_coding	protein_coding	pgaptmp_001307	0.3352	528				TRUE	0.595926	0.00129688	0.0117974	Chromosome_I	1384535	1385062	528	+	8.21246	363.105	391.652	338.168	352.975	432.168	430.477	348.212	435.838	370.881	270.412	281.189	246.395	310.785	223.097	214.745	269.67	211.709	185.218	242.524	233.2	258.373	28.3371	30.6555	26.7325	36.0143	42.3216	39.907	31.401	35.8698
pgaptmp_000428	pgaptmp_000428	pyrB	protein_coding	protein_coding	pgaptmp_000428	0.4806	930	GO:0006207	GO:0004070		TRUE	-0.679524	0.00130043	0.0118092	Chromosome_I	461916	462845	930	-	9.31772	647.575	615.202	607.722	625.234	690.922	447.795	400.184	539.573	439.146	742.625	883.477	663.228	742.349	698.15	772.028	603.386	677.737	664.14	682.866	689.404	782.596	28.6923	27.3386	27.2749	36.2179	38.414	23.5683	20.4885	25.2119
pgaptmp_002725	pgaptmp_002725	rdgC	protein_coding	protein_coding	pgaptmp_002725	0.4612	915	GO:0006310			TRUE	-0.531457	0.00130464	0.0118271	Chromosome_I	2951757	2952671	915	+	11.7711	4162.98	4771.11	4730.27	3643.78	3392.48	3287.13	3309.87	3110.57	3168.33	2871.62	3252.72	3330.96	3091.65	3323.15	3272.56	2816.36	2686.98	2897.35	4314.57	4553.76	4577.61	187.474	215.497	215.777	214.534	191.708	175.844	172.236	147.726
pgaptmp_005279	pgaptmp_005279	pgaptmp_005279	protein_coding	protein_coding	pgaptmp_005279	0.469	420				TRUE	0.769706	0.00130734	0.0118312	Chromosome_II	2262472	2262891	420	+	6.32031	83.2597	94.1725	91.4851	171.042	258.072	138.544	167.795	200.754	196.349	16.144	48.9813	42.6096	33.877	35.518	30.3014	38.765	63.9123	66.1495	87.1744	126.794	98.863	8.16852	9.26652	9.09163	21.9391	31.7713	16.1463	19.0223	20.7708
pgaptmp_002369	pgaptmp_002369	pgaptmp_002369	protein_coding	protein_coding	pgaptmp_002369	0.4709	1221	GO:0009234	GO:0008909	GO:0005737	TRUE	-0.568365	0.00131037	0.0118382	Chromosome_I	2582655	2583875	1221	-	6.42389	77.8632	80.9708	94.7524	94.8101	105.14	94.0122	61.624	67.1668	71.0797	80.7201	76.1931	68.5459	73.6457	75.4757	68.5076	109.553	105.189	107.162	92.7625	103.219	101.355	2.62769	2.74065	3.23903	4.18315	4.45243	3.76879	2.40307	2.39043
pgaptmp_004608	pgaptmp_004608	pgaptmp_004608	protein_coding	protein_coding	pgaptmp_004608	0.4509	1131				TRUE	0.743238	0.00131276	0.0118395	Chromosome_II	1500121	1501251	1131	-	9.72762	793.28	691.772	812.747	823.823	901.203	643.242	882.782	1097.06	1073.94	746.661	845.381	778.088	951.502	1218.71	957.789	1073.62	1059.88	1123.22	476.106	640.343	646.348	28.9016	25.278	29.9939	39.2406	41.2006	27.8384	37.1641	42.1507
pgaptmp_002440	pgaptmp_002440	fldA	protein_coding	protein_coding	pgaptmp_002440	0.4326	534				TRUE	-0.883884	0.00131964	0.0118721	Chromosome_I	2655775	2656308	534	+	13.5282	7083.24	9058.16	9517.71	9897.4	8027.53	15851	7781.7	6468.16	6706.12	16144	15811.9	19296.6	14614.2	12241.5	13447.3	18534.7	18661.1	16551.9	15086.2	11781	10562.6	546.574	701.036	743.93	998.491	777.293	1452.94	693.85	526.353
pgaptmp_005308	pgaptmp_005308	pgaptmp_005308	protein_coding	protein_coding	pgaptmp_005308	0.4971	1191			GO:0019867	TRUE	0.607864	0.00132087	0.0118721	Chromosome_II	2294695	2295885	1191	+	7.13759	80.9469	91.5322	93.9355	104.419	139.96	118.752	141.067	173.141	159.753	161.44	159.643	111.155	271.016	237.526	259.538	205.623	147.797	174.635	97.233	91.1135	106.34	2.80057	3.17617	3.29199	4.72316	6.07624	4.88048	5.63957	6.31722
pgaptmp_001851	pgaptmp_001851	pgaptmp_001851	protein_coding	protein_coding	pgaptmp_001851	0.4314	408				TRUE	0.635319	0.00135453	0.012143	Chromosome_I	1981844	1982251	408	+	6.99073	191.96	227.95	205.841	155.027	156.345	153.388	193.781	184.336	187.904	88.7922	67.1225	96.3347	92.7936	82.1353	65.8727	106.182	117.173	108.485	125.173	121.697	98.0322	19.3869	23.0899	21.0578	20.4697	19.8138	18.402	22.6144	19.633
pgaptmp_001739	pgaptmp_001739	nagK	protein_coding	protein_coding	pgaptmp_001739	0.4675	909		GO:0045127		TRUE	0.589212	0.00135562	0.012143	Chromosome_I	1838759	1839667	909	-	10.941	3461.44	3913	3493.59	2937.83	2835.38	3565.87	3232.66	3327	3002.94	1156.32	1229.97	1194.92	960.34	793.604	779.933	1301.16	1300.88	2171.03	1842.96	2239.61	2076.12	156.91	177.905	160.416	174.111	161.284	192.015	169.328	159.047
pgaptmp_001343	pgaptmp_001343	pgaptmp_001343	protein_coding	protein_coding	pgaptmp_001343	0.4113	834				TRUE	0.679923	0.00136073	0.0121539	Chromosome_I	1416276	1417109	834	+	8.2859	422.466	404.854	321.015	390.131	406.224	263.069	389.79	416.434	483.483	334.989	217.695	279.741	393.268	399.577	287.205	193.825	243.666	170.666	221.848	252.314	299.912	20.8729	20.062	16.0657	25.2004	25.1851	15.4396	22.2535	21.6979
pgaptmp_004289	pgaptmp_004289	pgaptmp_004289	protein_coding	protein_coding	pgaptmp_004289	0.4603	819				TRUE	0.602479	0.00136146	0.0121539	Chromosome_II	1141422	1142240	819	-	11.1012	2359.79	2132.52	2371.26	2890.43	2789.63	2251.35	3473.22	3988.96	3606.77	1771.81	1835.89	1635.84	1951.61	2299.79	2164.58	1210.14	1323.52	1284.62	2226.3	2217.31	2621.95	118.727	107.61	120.847	190.126	176.119	134.552	201.921	211.648
pgaptmp_003590	pgaptmp_003590	pgaptmp_003590	protein_coding	protein_coding	pgaptmp_003590	0.4146	357				TRUE	-0.65901	0.0013691	0.012177	Chromosome_II	341497	341853	357	-	12.2867	2356.71	2740.68	2773.96	3689.91	3360.39	4416.1	3926.86	3225.5	3508.24	10190.9	9146.8	9941	4325.95	5115.7	5333.05	11484.6	7716.08	6932.46	5899.92	5361.04	5051.98	272.017	317.272	324.319	556.815	486.705	605.485	523.733	392.614
pgaptmp_002624	pgaptmp_002624	pgaptmp_002624	protein_coding	protein_coding	pgaptmp_002624	0.4731	1560				TRUE	-0.572338	0.0013705	0.012177	Chromosome_I	2838756	2840315	1560	-	12.4257	3251.75	3260.83	3233.83	3691.19	4479.39	4592.58	3283.89	3028.48	2827	6552.46	6623.36	6852.73	10678.6	9820.72	11212.8	10471.6	10700	14544.9	4205.61	4358.79	4625.79	85.8917	86.3864	86.5235	127.469	148.47	144.1	100.23	84.3601
pgaptmp_002530	pgaptmp_002530	pgaptmp_002530	protein_coding	protein_coding		0.5	1000				TRUE	-1.47717	0.00137291	0.012177	pgaptmp_002530	1	1000	1000	+	11.9343	2621.14	2463.45	3639.8	5948.05	6646.37	11045.6	2776.05	2444.13	2287.22	9397.84	10420.3	9287.04	3521.74	2335.31	2827.26	2014.1	1665.71	967.105	9527.15	6756.42	3927.93	108.006	101.809	151.921	320.434	343.66	540.658	132.178	106.209
pgaptmp_003447	pgaptmp_003447	pgaptmp_003447	protein_coding	protein_coding	pgaptmp_003447	0.4567	1572		GO:0008484		TRUE	0.534331	0.00137553	0.012177	Chromosome_II	196356	197927	1572	+	6.77549	123.348	106.494	102.921	156.308	148.835	139.369	191.554	217.919	194.941	58.5221	63.4943	64.8407	97.2123	94.3446	75.0949	82.5863	59.9178	80.7023	126.291	138.263	133.756	3.23323	2.79972	2.73269	5.35666	4.89549	4.33957	5.80192	6.02393
pgaptmp_001424	pgaptmp_001424	pgaptmp_001424	protein_coding	protein_coding	pgaptmp_001424	0.4477	726				TRUE	-0.98288	0.0013756	0.012177	Chromosome_I	1475393	1476118	726	-	11.4957	3577.85	4569.57	5123.16	6119.09	5625.01	9590.07	4525.28	3246.4	3074.73	536.789	522.467	600.239	1150.35	1284.2	1654.72	3421.43	2906.68	2811.35	8249.16	6016.04	6511.67	203.069	260.124	294.539	454.061	400.618	646.574	296.785	194.313
pgaptmp_000233	pgaptmp_000233	asd	protein_coding	protein_coding	pgaptmp_000233	0.479	858	GO:0008654	GO:0004609		TRUE	-0.724158	0.00138313	0.012223	Chromosome_I	253137	253994	858	-	12.1264	4660.23	3968.45	4049.85	3780.87	4361.96	3230.23	2825.05	3107.58	3181.7	6395.05	7546.75	7230.66	6542.68	6535.31	7045.74	2630.96	3652.32	3582.65	4080.43	4743	5807.16	223.809	191.15	197.012	237.394	262.868	184.28	156.773	157.389
pgaptmp_002438	pgaptmp_002438	pgaptmp_002438	protein_coding	protein_coding	pgaptmp_002438	0.4323	768				TRUE	-0.5254	0.00139713	0.0123069	Chromosome_I	2654625	2655392	768	+	10.7864	2815.41	2409.76	2797.65	2585.5	2289.87	1415.13	1856.89	1975.45	2024.01	1313.72	1335.19	1200.48	883.748	1551.69	1314.82	1110.7	1217	1242.29	2677.82	2602.15	2901.09	151.056	129.674	152.045	181.362	154.168	90.1921	115.122	111.774
pgaptmp_003415	pgaptmp_003415	pgaptmp_003415	protein_coding	protein_coding	pgaptmp_003415	0.4733	1944				TRUE	0.516295	0.00139729	0.0123069	Chromosome_II	160553	162496	1944	-	8.07224	281.387	283.398	284.257	374.115	323.614	291.108	473.688	451.51	470.111	129.152	156.014	140.797	179.695	196.459	218.697	214.05	287.605	297.673	282.758	317.942	339.79	5.96439	6.02479	6.10318	10.3675	8.60745	7.32978	11.6019	10.0927
pgaptmp_000041	pgaptmp_000041	pgaptmp_000041	protein_coding	protein_coding	pgaptmp_000041	0.443	456			GO:0016020	TRUE	-0.572705	0.00140367	0.0123425	Chromosome_I	44573	45028	456	-	7.92107	249.008	308.921	303.861	422.802	366.626	333.991	248.723	212.695	210.424	211.89	132.431	188.964	188.533	188.689	152.825	192.14	203.72	206.386	341.992	327.499	308.22	22.5013	27.9978	27.8132	49.9501	41.5721	35.8511	25.9707	20.2689
pgaptmp_000158	pgaptmp_000158	pgaptmp_000158	protein_coding	protein_coding	pgaptmp_000158	0.4541	588				TRUE	-0.997926	0.00140943	0.0123724	Chromosome_I	164456	165043	588	+	12.3933	2535.56	3442.14	3638.16	4814.17	5174.41	9792.12	3871.17	2773.24	2961.42	5761.4	7604.8	6973.15	6538.26	4558.51	5387.07	10871.1	9708.01	7624.39	7731.7	5594.24	5251.37	177.687	241.932	258.253	441.071	455.016	815.14	313.471	204.95
pgaptmp_000231	pgaptmp_000231	pgaptmp_000231	protein_coding	protein_coding	pgaptmp_000231	0.4689	1881	GO:0006935			TRUE	0.684859	0.00141514	0.0123823	Chromosome_I	249387	251267	1881	-	10.5119	2362.11	2521.53	2216.06	1811.64	1947.14	1628.72	1801.2	2336.66	2177.43	1356.1	1409.57	1376.48	706.999	879.07	823.409	1243.85	1081.18	1102.05	1375.23	1139.87	1282.73	51.7451	55.401	49.1738	51.8857	53.5246	42.3829	45.5938	53.9814
pgaptmp_000467	pgaptmp_000467	pgaptmp_000467	protein_coding	protein_coding		0.5	1000				TRUE	-1.50491	0.00141822	0.0123823	pgaptmp_000467	1	1000	1000	+	14.0207	5852.85	7052.38	10676.8	14857.6	14071.7	20156.6	8212.32	6960.72	5397.13	46650.2	36511	42770.8	19788.6	19776.8	20685.3	40179.1	25329.2	21966.9	24673.7	20571.3	11207.2	241.171	291.459	445.638	800.413	727.598	986.618	391.02	302.476
pgaptmp_005267	pgaptmp_005267	pgaptmp_005267	protein_coding	protein_coding	pgaptmp_005267	0.4708	291		GO:0004497		TRUE	0.519536	0.00141991	0.0123823	Chromosome_II	2252516	2252806	291	+	7.75794	189.647	169.863	261.386	291.477	318.835	274.615	357.122	373.149	337.101	153.368	188.669	118.566	116.36	152.061	123.841	296.637	205.052	166.697	246.435	222.368	246.742	26.8541	24.1238	37.4913	53.9604	56.6522	46.1916	58.4327	55.722
pgaptmp_004166	pgaptmp_004166	pgaptmp_004166	protein_coding	protein_coding	pgaptmp_004166	0.4657	1518				TRUE	-0.716067	0.00141996	0.0123823	Chromosome_II	1006678	1008195	1518	+	6.62481	81.7178	80.9708	92.3019	168.48	167.951	126.174	100.974	141.05	143.567	80.7201	45.353	50.02	67.754	78.8055	71.1425	60.6757	62.5808	55.5655	208.995	204.528	213.511	2.21821	2.20444	2.53793	5.97917	5.72079	4.06848	3.16717	4.03775
pgaptmp_001008	pgaptmp_001008	nhaC	protein_coding	protein_coding	pgaptmp_001008	0.4468	1437	GO:0006814,GO:1902600	GO:0015297,GO:0015385	GO:0016020	TRUE	-0.674133	0.00142441	0.0123952	Chromosome_I	1067088	1068524	1437	-	13.0974	6059.45	6337.72	7124.4	8223.49	8956.73	10658.8	7767.59	6575.63	6373.25	10192.9	11017.2	10654.3	5529.32	6033.61	6770.4	14555.4	13974.2	13367.5	11034.8	10825.9	10182.9	173.754	182.271	206.934	308.293	322.282	363.066	257.373	198.847
pgaptmp_004182	pgaptmp_004182	pgaptmp_004182	protein_coding	protein_coding	pgaptmp_004182	0.4373	1221				TRUE	0.497981	0.00142614	0.0123952	Chromosome_II	1022005	1023225	1221	-	7.62037	319.162	334.444	337.351	442.02	376.867	324.095	481.112	453.003	479.964	125.116	47.1672	85.2192	51.552	92.1247	85.6345	116.295	101.194	79.3793	300.64	316.667	348.097	10.7709	11.3201	11.5321	19.5025	15.9594	12.9924	18.7613	16.1221
pgaptmp_000207	pgaptmp_000207	pgaptmp_000207	protein_coding	protein_coding	pgaptmp_000207	0.4891	1380	GO:0055085	GO:0015297,GO:0042910	GO:0016020	TRUE	-0.511251	0.0014341	0.0124438	Chromosome_I	225120	226499	1380	-	9.80251	740.086	748.979	862.573	804.604	824.054	843.636	584.314	524.647	536.969	926.264	979.626	863.307	1334.46	1190.96	1439.98	1333.18	1379.44	1420.89	727.571	806.641	748.534	22.0984	22.4302	26.089	31.41	30.876	29.9233	20.1604	16.5206
pgaptmp_002595	pgaptmp_002595	thiI	protein_coding	protein_coding	pgaptmp_002595	0.4486	1449	GO:0006400,GO:0009228	GO:0140741		TRUE	-0.604509	0.00143779	0.0124554	Chromosome_I	2803832	2805280	1449	-	12.8377	7959.01	8184.21	7392.32	6424.66	7135.89	5050.27	5170.47	5740.52	5632.19	9946.74	11262.1	11756.5	7332.16	7779.54	7933.71	6536.12	6690.82	5490.4	7698.73	7787.34	8920.1	226.333	233.426	212.938	238.862	254.638	170.6	169.9	172.155
pgaptmp_000490	pgaptmp_000490	pgaptmp_000490	protein_coding	protein_coding	pgaptmp_000490	0.4192	198				TRUE	1.77835	0.00144167	0.0124684	Chromosome_I	510701	510898	198	+	6.66501	1982.04	1278.81	1150.91	72.3888	63.4938	28.0387	66.0787	97.765	156.235	125.116	90.7061	83.3666	70.6999	79.9154	96.1741	64.0465	90.5424	66.1495	12.2938	33.1322	31.5697	412.483	266.921	242.616	19.6956	16.581	6.93148	15.8902	21.4563
pgaptmp_001608	pgaptmp_001608	pgaptmp_001608	protein_coding	protein_coding	pgaptmp_001608	0.4611	1620				TRUE	0.705398	0.0014506	0.0125251	Chromosome_I	1678272	1679891	1620	+	7.69765	311.453	358.208	316.114	263.29	253.293	290.283	308.862	329.864	292.06	115.026	130.617	124.124	113.414	92.1247	84.317	257.872	256.981	317.517	147.526	213.448	185.264	7.92201	9.13821	8.14459	8.75556	8.08447	8.77081	9.07784	8.84824
pgaptmp_001300	pgaptmp_001300	pgaptmp_001300	protein_coding	protein_coding	pgaptmp_001300	0.4021	378				TRUE	0.476539	0.00146485	0.0126274	Chromosome_I	1382238	1382615	378	+	8.94956	524.227	589.678	608.539	620.109	592.609	650.664	645.938	625.398	672.09	391.493	335.612	313.088	465.441	426.216	417.633	448.326	474.016	449.816	447.607	431.993	468.561	57.146	64.4711	67.1951	88.3773	81.0626	84.2553	81.3639	71.8955
pgaptmp_004441	pgaptmp_004441	dld	protein_coding	protein_coding	pgaptmp_004441	0.4605	1707	GO:0006089	GO:0016901		TRUE	1.39501	0.00146908	0.0126432	Chromosome_II	1307857	1309563	1707	-	9.46224	1011.45	870.436	706.559	2085.82	2720.68	1184.22	2029.14	3496.41	3117.65	270.412	255.791	305.678	287.218	267.495	316.189	207.309	215.704	281.797	694.042	1046.21	1444.73	24.4157	21.0739	17.2765	65.8276	82.4114	33.9573	56.5992	89.0073
pgaptmp_001004	pgaptmp_001004	pgaptmp_001004	protein_coding	protein_coding	pgaptmp_001004	0.4035	228				TRUE	-0.805673	0.0014733	0.0126457	Chromosome_I	1062959	1063186	228	-	12.1171	2686.67	3120.01	3485.42	3396.51	3105.05	4285.8	3035.17	2509.8	2573.65	6873.32	7225.65	6356.24	4186.02	4744.98	4625.58	9598.56	7921.13	7427.26	5526.07	4038.3	4184.65	485.553	565.54	638.059	802.531	704.171	920.09	633.841	478.345
pgaptmp_004596	pgaptmp_004596	pgaptmp_004596	protein_coding	protein_coding	pgaptmp_004596	0.4539	1194				TRUE	0.688826	0.00147624	0.0126457	Chromosome_II	1488178	1489371	1194	-	13.6025	15667.5	19843.1	20483.7	23650.6	19543.8	20886.4	33530.1	31726.6	30057.6	5676.64	5895.9	7369.61	6955.1	5697.3	6446.3	4678.77	4801.41	5052.5	18564.2	20542	18199.1	540.695	686.827	716.052	1067.09	846.348	856.232	1337.1	1154.67
pgaptmp_001703	pgaptmp_001703	ccoS	protein_coding	protein_coding	pgaptmp_001703	0.3879	165	GO:0008535			TRUE	0.561941	0.00147847	0.0126457	Chromosome_I	1800666	1800830	165	+	8.81182	656.055	680.33	650.197	429.208	520.24	456.866	610.3	585.844	501.077	361.223	507.954	298.267	405.051	371.829	413.681	385.965	330.213	416.742	378.873	359.994	368.867	163.838	170.403	164.476	140.135	163.029	135.531	176.113	154.289
pgaptmp_000283	pgaptmp_000283	slyD	protein_coding	protein_coding	pgaptmp_000283	0.4861	576		GO:0003755		TRUE	-0.769039	0.00147898	0.0126457	Chromosome_I	298614	299189	576	+	13.1823	6631.48	7850.64	8536.7	7921.12	6432.68	9823.45	6888.52	5579.32	5342.94	11827.5	8468.32	10365.2	14680.5	15072.9	17036	9462.04	11823.8	11537.8	10854.3	9684.15	8870.25	474.401	563.28	618.598	740.847	577.448	834.785	569.424	420.917
pgaptmp_004748	pgaptmp_004748	pgaptmp_004748	protein_coding	protein_coding	pgaptmp_004748	0.4576	909		GO:0016491		TRUE	0.817654	0.00149999	0.0128046	Chromosome_II	1667700	1668608	909	-	10.4418	2274.22	2290.94	2210.34	2476.59	2536.34	1716.96	3739.01	3862.84	4049.43	563.023	645.827	640.996	642.19	734.778	671.901	547.767	519.287	710.445	1598.76	2285.48	2528.07	103.093	104.158	101.493	146.776	144.274	92.4547	195.851	184.663
pgaptmp_002952	pgaptmp_002952	pgaptmp_002952	protein_coding	protein_coding	pgaptmp_002952	0.5	300				TRUE	-0.535176	0.00150507	0.0128064	Chromosome_I	3212822	3213121	300	+	9.32151	945.922	1027.1	907.499	871.228	869.797	578.917	875.357	817.196	819.88	443.961	379.151	289.004	321.095	542.759	561.235	325.289	370.159	384.99	1264.03	1086.99	1185.53	129.925	141.492	126.26	156.45	149.913	94.4557	138.93	118.37
pgaptmp_001720	pgaptmp_001720	fdh3B	protein_coding	protein_coding	pgaptmp_001720	0.4844	609		GO:0009055		TRUE	1.39703	0.00150531	0.0128064	Chromosome_I	1815603	1816211	609	-	10.1473	2363.65	1405.55	1249.75	604.094	879.355	645.716	798.884	1664.24	1411.04	3355.94	3660.9	3795.96	1595.17	1335.25	1309.55	741.592	796.241	683.985	383.903	406.506	627.24	159.928	95.3827	85.6539	53.4381	74.6605	51.8987	62.4596	118.751
pgaptmp_004068	pgaptmp_004068	yiaY	protein_coding	protein_coding	pgaptmp_004068	0.4708	1149		GO:0016491		TRUE	1.43435	0.0015075	0.0128064	Chromosome_II	857422	858570	1149	-	10.8978	20758.6	16394.8	14059.3	21960.7	19590.9	6471.17	20079	30050.4	28516.3	121.08	107.033	85.2192	131.089	136.522	121.206	112.924	107.852	150.821	5830.63	9338.18	13128	744.453	589.696	510.722	1029.65	881.614	275.674	832.061	1136.5
pgaptmp_005248	pgaptmp_005248	pgaptmp_005248	protein_coding	protein_coding	pgaptmp_005248	0.482	888				TRUE	0.531276	0.00151641	0.0128468	Chromosome_II	2227693	2228580	888	-	5.66024	47.0263	41.3655	39.2079	39.0771	51.2047	48.6554	74.2457	74.6298	76.7098	34.3061	25.3977	50.02	47.1332	47.7273	52.6982	50.5631	61.2493	68.7954	46.9401	49.0611	49.0161	2.18216	1.92516	1.8429	2.37068	2.98154	2.68195	3.98099	3.65205
pgaptmp_001302	pgaptmp_001302	pgaptmp_001302	protein_coding	protein_coding	pgaptmp_001302	0.4155	426				TRUE	0.551271	0.00151713	0.0128468	Chromosome_I	1382756	1383181	426	+	9.17797	666.848	712.015	763.737	698.263	612.408	659.735	720.184	731.372	769.209	544.861	471.672	411.275	537.614	513.901	432.125	601.7	551.243	508.028	538.693	463.213	458.591	64.5024	69.075	74.8299	88.3027	74.3319	75.8041	80.4945	74.6047
pgaptmp_004464	pgaptmp_004464	pgaptmp_004464	protein_coding	protein_coding	pgaptmp_004464	0.4027	375				TRUE	0.58702	0.0015318	0.0129503	Chromosome_II	1332406	1332780	375	-	7.50463	174.999	138.178	139.678	234.463	275.14	216.888	198.236	218.665	254.761	209.872	190.483	133.387	195.898	228.647	176.539	150.004	186.411	138.914	134.673	143.36	148.71	19.2293	15.2283	15.5467	33.6827	37.9373	28.3098	25.1701	25.3388
pgaptmp_005300	pgaptmp_005300	pgaptmp_005300	protein_coding	protein_coding	pgaptmp_005300	0.4735	585				TRUE	0.547109	0.00153899	0.0129559	Chromosome_II	2285726	2286310	585	+	6.79221	98.6781	76.5702	121.708	138.371	137.229	121.226	168.538	176.126	171.717	92.8282	72.5649	101.893	88.3748	74.3657	73.7774	109.553	102.526	127.007	121.821	108.954	104.678	6.95061	5.40935	8.68367	12.7425	12.1292	10.1432	13.7175	13.083
pgaptmp_003741	pgaptmp_003741	pgaptmp_003741	protein_coding	protein_coding	pgaptmp_003741	0.4026	231	GO:0006355			TRUE	-0.850651	0.00153959	0.0129559	Chromosome_II	498491	498721	231	+	6.494	47.0263	65.1286	44.9257	107.622	113.333	93.1876	46.7748	73.8835	68.9684	167.494	121.546	124.124	66.2811	101.004	93.5392	89.3281	99.8629	108.485	106.733	130.617	110.494	8.38855	11.652	8.11753	25.0989	25.3681	19.746	9.64124	13.8987
pgaptmp_004162	pgaptmp_004162	pgaptmp_004162	protein_coding	protein_coding	pgaptmp_004162	0.4521	1515		GO:0005515		TRUE	-1.05723	0.00154067	0.0129559	Chromosome_II	1002396	1003910	1515	+	5.31409	20.8149	21.1228	26.1386	39.0771	38.2328	26.3894	42.3201	32.8371	53.4857	40.3601	56.2378	33.3466	47.1332	45.5074	26.3491	33.7087	15.9781	35.7207	77.6746	80.2818	125.448	0.566135	0.57621	0.720129	1.38955	1.30487	0.852608	1.33005	0.941867
pgaptmp_003053	pgaptmp_003053	pgaptmp_003053	protein_coding	protein_coding	pgaptmp_003053	0.4296	405	GO:0006654,GO:0008654,GO:0016310	GO:0004143,GO:0005524,GO:0046872		TRUE	-0.657176	0.00154231	0.0129559	Chromosome_I	3305695	3306099	405	-	10.625	1730.72	1599.17	1596.9	1371.54	1334.05	1162.78	1066.17	1114.97	1135.16	1800.06	1982.83	2010.06	1673.23	1816.97	1891.86	1882.63	1857.45	1670.94	1473.02	1580.79	2035.41	176.088	163.186	164.575	182.439	170.319	140.532	125.344	119.631
pgaptmp_004189	pgaptmp_004189	pgaptmp_004189	protein_coding	protein_coding	pgaptmp_004189	0.46	2037	GO:0015891	GO:0015343		TRUE	-0.723107	0.0015497	0.0129973	Chromosome_II	1031815	1033851	2037	+	8.33294	201.982	170.743	187.054	449.067	509.316	348.01	196.751	259.712	268.836	464.141	654.898	327.909	245.977	267.495	160.729	672.489	474.016	316.194	345.345	384.843	445.299	4.08582	3.46412	3.83281	11.8764	12.9283	8.36245	4.59895	5.54036
pgaptmp_005218	pgaptmp_005218	pgaptmp_005218	protein_coding	protein_coding	pgaptmp_005218	0.4747	1125				TRUE	1.2218	0.0015591	0.0130553	Chromosome_II	2189203	2190327	1125	-	9.50029	3441.4	2670.27	2247.92	2252.38	2469.43	1442.35	2332.8	4390.47	3667.29	183.638	145.13	138.944	179.695	149.841	179.174	144.947	143.803	164.051	1078.5	1530.45	1707.26	126.049	98.0946	83.4006	107.858	113.498	62.7552	98.732	169.588
pgaptmp_003794	pgaptmp_003794	pgaptmp_003794	protein_coding	protein_coding	pgaptmp_003794	0.4343	2328				TRUE	0.529483	0.00156666	0.0130977	Chromosome_II	548682	551009	2328	+	9.35854	1102.42	1165.27	1066.78	1002.55	899.837	736.429	1066.91	1179.15	1199.91	296.647	283.003	353.845	377.066	385.148	405.776	463.495	387.468	714.414	745.453	721.899	841.582	19.5129	20.6865	19.1264	23.2	19.986	15.4839	21.8212	22.0102
pgaptmp_004366	pgaptmp_004366	pntB	protein_coding	protein_coding	pgaptmp_004366	0.4674	1395		GO:0008750,GO:0050661	GO:0016020	TRUE	0.883927	0.00157109	0.013114	Chromosome_II	1230083	1231477	1395	-	12.1546	6328.5	5488.41	5445.81	5682.2	7046.45	4387.24	6097.8	9289.17	8136.16	4736.25	5875.94	4933.45	2906.06	2618.34	2758.75	2794.45	2741.57	2944.97	3553.47	4111.58	4697.24	186.933	162.598	162.941	219.435	261.18	153.939	208.129	289.361
pgaptmp_000571	pgaptmp_000571	pgaptmp_000571	protein_coding	protein_coding	pgaptmp_000571	0.4286	924				TRUE	0.763866	0.00157603	0.0131343	Chromosome_I	580182	581105	924	+	11.1634	4632.47	4380.34	4480.32	2746.29	2920.03	1526.46	3195.54	3972.54	3596.21	1628.53	1610.94	1734.03	2141.62	2379.7	2238.35	1112.39	1203.68	1256.84	1656.31	2081.59	2410.1	206.585	195.919	202.385	160.117	163.403	80.8624	164.666	186.825
pgaptmp_000138	pgaptmp_000138	pgaptmp_000138	protein_coding	protein_coding		0.5	1000				TRUE	-0.823214	0.00157852	0.0131343	pgaptmp_000138	1	1000	1000	+	14.0225	9655.04	9171.7	9882.84	9454.74	12099.3	17179.5	8125.45	8466.75	7240.28	39100.8	44505.8	47632	27533.2	18767.9	22159.6	37586.9	25750	22902.3	16102.1	13245.9	11477.2	397.843	379.046	412.499	509.347	625.612	840.898	386.884	367.921
pgaptmp_003674	pgaptmp_003674	pgaptmp_003674	protein_coding	protein_coding	pgaptmp_003674	0.4536	840				TRUE	0.572981	0.00158265	0.013148	Chromosome_II	429350	430189	840	-	8.24626	287.554	346.766	364.307	507.362	432.168	441.198	585.799	551.514	620.716	153.368	185.04	181.554	194.425	170.93	171.269	257.872	194.4	223.585	360.991	428.17	348.928	14.1058	17.0608	18.1021	32.5389	26.6022	25.7091	33.2049	28.5309
pgaptmp_000703	pgaptmp_000703	serB	protein_coding	protein_coding	pgaptmp_000703	0.4638	981	GO:0006564	GO:0036424		TRUE	0.582976	0.00159601	0.0132381	Chromosome_I	728335	729315	981	+	10.8169	2533.25	2914.95	3103.14	2235.72	2117.14	2539.15	2977.25	3168.03	2991.68	1132.1	1059.45	1209.74	1634.93	1187.63	1266.07	916.877	1158.41	1067.65	1763.05	2207.11	1938.21	106.406	122.801	132.03	122.776	111.59	126.693	144.504	140.333
pgaptmp_001899	pgaptmp_001899	pgaptmp_001899	protein_coding	protein_coding	pgaptmp_001899	0.4429	1707				TRUE	0.66574	0.00160157	0.0132633	Chromosome_I	2041254	2042960	1707	+	11.811	9849.31	10269.2	9857.51	6660.41	6448.38	4205.81	7037.01	9243.65	8103.79	1715.3	1681.69	1754.4	1736.57	1650.48	1663.94	1105.65	1143.76	1293.88	4767.21	4987.03	5142.54	237.755	248.625	241.032	210.199	195.326	120.6	196.285	235.314
pgaptmp_000188	pgaptmp_000188	pgaptmp_000188	protein_coding	protein_coding	pgaptmp_000188	0.502	3432				TRUE	0.535926	0.0016378	0.013542	Chromosome_I	202833	206264	3432	+	8.82964	355.395	416.295	362.673	311.336	313.373	371.926	435.822	444.047	415.218	286.557	277.561	326.056	966.231	947.886	803.647	864.628	1046.56	990.919	251.465	305.836	303.235	4.267	5.01298	4.41071	4.88704	4.72126	5.30446	6.04637	5.62237
pgaptmp_002822	pgaptmp_002822	pgaptmp_002822	protein_coding	protein_coding	pgaptmp_002822	0.2704	429				TRUE	-1.11078	0.0016441	0.0135728	Chromosome_I	3063888	3064316	429	+	5.76249	40.088	36.0848	53.9108	67.2639	43.6947	76.6942	36.3804	23.1352	27.4466	70.6301	61.6801	77.8088	29.4583	45.5074	54.0156	161.802	67.9068	55.5655	88.292	67.5387	48.1853	3.85048	3.47623	5.24517	8.44674	5.26642	8.7506	4.03778	2.34344
pgaptmp_000693	pgaptmp_000693	pgaptmp_000693	protein_coding	protein_coding	pgaptmp_000693	0.4298	1068				TRUE	0.494536	0.0016538	0.0136316	Chromosome_I	717280	718347	1068	+	8.94893	583.589	572.956	618.341	473.41	469.035	511.295	672.666	638.831	617.197	357.187	382.78	405.717	388.849	405.127	368.887	648.893	545.917	590.053	420.225	424.984	476.869	22.5161	22.1713	24.1656	23.8798	22.708	23.4333	29.9889	25.9927
pgaptmp_002287	pgaptmp_002287	pgaptmp_002287	protein_coding	protein_coding	pgaptmp_002287	0.4444	549				TRUE	-0.673656	0.00166282	0.0136845	Chromosome_I	2485054	2485602	549	+	9.14365	427.862	425.096	485.198	588.719	543.453	657.261	350.44	321.654	350.472	653.833	669.411	726.216	698.161	681.501	649.505	884.854	852.164	775.272	556.016	598.291	436.16	32.1137	32.0005	36.8882	57.7697	51.1839	58.6001	30.393	25.4598
pgaptmp_003080	pgaptmp_003080	pgaptmp_003080	protein_coding	protein_coding	pgaptmp_003080	0.4703	1044				TRUE	0.496938	0.00166605	0.0136897	Chromosome_I	3330770	3331813	1044	-	8.74479	477.201	494.626	490.915	323.507	351.606	339.763	450.672	463.451	446.887	341.043	397.293	377.929	764.442	582.717	501.95	451.697	575.211	494.798	279.964	328.136	321.512	18.8347	19.5802	19.6267	16.6935	17.414	15.9297	20.5538	19.2904
pgaptmp_000264	pgaptmp_000264	pgaptmp_000264	protein_coding	protein_coding	pgaptmp_000264	0.4614	687	GO:0005975	GO:0008967		TRUE	-0.538864	0.00167558	0.0137466	Chromosome_I	276703	277389	687	+	10.6865	1103.19	1084.3	1166.43	998.709	1009.07	959.914	824.87	904.513	875.477	2685.96	2354.73	2991.93	2951.72	2862.53	3234.35	3439.97	3592.4	3445.06	1181.32	1129.68	1369.13	66.1686	65.2283	70.8671	78.3153	75.9469	68.3925	57.1691	57.2131
pgaptmp_000942	pgaptmp_000942	pgaptmp_000942	protein_coding	protein_coding	pgaptmp_000942	0.476	624			GO:0005886,GO:0016020	TRUE	-0.798432	0.00167927	0.0137467	Chromosome_I	991080	991703	624	-	10.6115	1032.27	1278.81	1433.54	1387.56	1279.43	2407.21	1202.78	892.572	912.072	1757.68	1995.53	2024.88	1495.01	1321.93	1457.1	2941.08	2501.9	2100.91	1942.42	1662.34	1472.98	68.1656	84.696	95.8883	119.793	106.017	188.826	91.7772	62.1579
pgaptmp_002565	pgaptmp_002565	pgaptmp_002565	protein_coding	protein_coding	pgaptmp_002565	0.4527	804				TRUE	-0.538479	0.00168432	0.0137467	Chromosome_I	2768755	2769558	804	+	11.8632	3325.76	3313.64	3508.29	3087.09	3479.19	2980.35	2661.71	2941.16	2650.36	4518.31	4843.7	4524.03	3763.29	3984.67	4177.65	4924.84	4718.86	4564.31	4005.55	3712.72	3908.83	170.448	170.33	182.129	206.851	223.751	181.445	157.629	158.964
pgaptmp_002678	pgaptmp_002678	pgaptmp_002678	protein_coding	protein_coding	pgaptmp_002678	0.4552	870				TRUE	-0.496904	0.0016844	0.0137467	Chromosome_I	2901198	2902067	870	-	9.87108	630.615	662.728	664.083	586.157	741.444	676.228	565.01	567.933	598.196	1095.78	1277.14	1259.76	1565.71	1321.93	1425.49	1832.07	1873.43	1779.42	716.395	831.49	829.951	29.8678	31.4817	31.8599	36.296	44.0659	38.0458	30.9221	28.3671
pgaptmp_004736	pgaptmp_004736	cpaB	protein_coding	protein_coding	pgaptmp_004736	0.4436	825				TRUE	-0.719231	0.00168604	0.0137467	Chromosome_II	1653242	1654066	825	-	9.14925	129.515	139.058	159.282	1064.05	1075.98	1067.12	1015.68	1036.61	1057.75	490.375	580.519	761.415	399.16	369.609	557.283	279.782	258.312	296.35	1973.16	1362.88	1633.32	6.46881	6.96603	8.05849	69.4821	67.4365	63.313	58.6187	54.6007
pgaptmp_001951	pgaptmp_001951	pgaptmp_001951	protein_coding	protein_coding	pgaptmp_001951	0.4661	1461				TRUE	0.49631	0.00169394	0.0137877	Chromosome_I	2107837	2109297	1461	+	8.30164	504.954	521.909	473.762	303.008	288.795	272.141	409.094	408.971	422.256	207.854	195.925	192.669	271.016	319.662	314.871	273.041	268.964	382.344	259.288	306.473	280.804	14.2416	14.7634	13.5348	11.173	10.2207	9.1175	13.3323	12.1641
pgaptmp_002020	pgaptmp_002020	focA	protein_coding	protein_coding	pgaptmp_002020	0.4506	861	GO:0015724	GO:0015499	GO:0005886	TRUE	-0.683946	0.0016963	0.0137877	Chromosome_I	2187728	2188588	861	-	10.8674	1483.26	1798.96	1872.99	2137.07	1805.82	2918.5	1530.2	1156.02	1241.43	2659.73	2617.78	2919.68	1542.14	1522.83	1548.01	2192.75	1954.65	1496.3	2222.39	2008.96	1891.69	70.9857	86.3495	90.7975	133.715	108.446	165.917	84.6212	58.3442
pgaptmp_004240	pgaptmp_004240	pgaptmp_004240	protein_coding	protein_coding	pgaptmp_004240	0.4778	540				TRUE	-0.750043	0.00169995	0.0137961	Chromosome_II	1091931	1092470	540	+	7.00956	85.5724	105.614	96.386	154.387	154.98	190.498	98.7468	65.6742	76.7098	106.954	101.591	124.124	159.075	134.302	135.698	210.679	268.964	158.759	131.32	145.909	129.602	6.52978	8.08294	7.45009	15.4021	14.8397	17.2675	8.70687	5.28492
pgaptmp_000200	pgaptmp_000200	trmL	protein_coding	protein_coding	pgaptmp_000200	0.4875	480	GO:0006400	GO:0008175		TRUE	-0.579733	0.00170861	0.013845	Chromosome_I	218643	219122	480	-	10.1212	871.914	1165.27	1154.18	1096.08	1052.09	1426.68	976.331	790.329	843.104	1339.95	1525.68	1696.97	1324.15	1141.01	1125.11	711.254	986.646	903.602	1274.09	1327.84	1187.19	74.8498	100.33	100.363	123.017	113.332	145.485	96.8476	71.5491
pgaptmp_003320	pgaptmp_003320	nagB	protein_coding	protein_coding	pgaptmp_003320	0.4682	801	GO:0006044	GO:0004342		TRUE	-0.616364	0.00172296	0.0139398	Chromosome_II	55586	56386	801	+	11.1713	1884.14	2075.32	2439.06	3695.03	3326.26	3472.68	4501.52	4047.92	4065.62	1305.65	1338.82	1374.62	1117.94	1233.14	1551.96	1090.48	1029.25	981.658	6781.72	6279.19	5677.56	96.9254	107.076	127.096	248.513	214.717	212.21	267.583	219.602
pgaptmp_001332	pgaptmp_001332	pgaptmp_001332	protein_coding	protein_coding	pgaptmp_001332	0.3814	687				TRUE	0.583545	0.00173562	0.0140207	Chromosome_I	1403731	1404417	687	+	8.60588	444.051	444.459	513.787	491.987	491.565	533.561	464.036	455.242	448.295	532.753	439.017	238.984	310.785	298.573	197.618	670.803	450.049	254.014	312.934	311.57	251.727	26.6339	26.7372	31.2153	38.5799	36.9972	38.0154	32.1608	28.7954
pgaptmp_002315	pgaptmp_002315	pgaptmp_002315	protein_coding	protein_coding	pgaptmp_002315	0.4253	576		GO:0015288	GO:0009279	TRUE	-0.758007	0.00173845	0.0140221	Chromosome_I	2519218	2519793	576	+	10.1562	1210.35	1409.95	1707.99	1530.41	1190	1691.4	1052.06	819.435	947.964	942.408	1017.72	774.383	640.717	742.547	657.409	1473.07	1620.44	1078.24	1788.19	1542.56	1296.02	86.5857	101.163	123.767	143.137	106.824	143.733	86.9664	61.8201
pgaptmp_005275	pgaptmp_005275	pgaptmp_005275	protein_coding	protein_coding	pgaptmp_005275	0.4041	1611				TRUE	0.606792	0.00174323	0.0140391	Chromosome_II	2258898	2260508	1611	+	8.45497	538.104	705.854	693.489	914.789	772.167	800.753	1047.61	858.243	954.298	127.134	175.97	135.239	92.7936	107.664	96.1741	180.342	133.151	132.299	663.866	544.132	603.978	13.7635	18.1076	17.9674	30.5907	24.7833	24.3297	30.9625	23.15
pgaptmp_003846	pgaptmp_003846	pgaptmp_003846	protein_coding	protein_coding	pgaptmp_003846	0.4378	450				TRUE	-0.8356	0.00175139	0.0140833	Chromosome_II	613328	613777	450	+	7.09424	61.6738	92.4123	89.0346	210.76	180.241	243.277	100.232	98.5113	125.973	163.458	107.033	161.175	141.4	102.114	118.571	180.342	141.14	123.038	227.436	196.882	151.202	5.64737	8.48709	8.25823	25.2313	20.7102	26.4619	10.6054	9.51286
pgaptmp_002696	pgaptmp_002696	trmJ	protein_coding	protein_coding	pgaptmp_002696	0.4681	720	GO:0006396	GO:0003723,GO:0008173		TRUE	-0.508246	0.00175671	0.0141046	Chromosome_I	2918651	2919370	720	-	12.1933	3559.35	3607.6	3672.47	2934.63	3344.69	3724.2	2897.81	2713.54	2763.66	6354.69	7777.14	7729.01	8149.63	7086.94	8157.67	6947.37	7230.08	6215.4	3800.47	3706.98	4050.06	203.703	207.075	212.896	219.576	240.197	253.182	191.633	163.773
pgaptmp_001900	pgaptmp_001900	pgaptmp_001900	protein_coding	protein_coding	pgaptmp_001900	0.4241	474	GO:0000160			TRUE	0.563566	0.00176233	0.0141249	Chromosome_I	2043046	2043519	474	-	7.42156	461.012	426.857	378.193	356.178	398.031	187.2	253.92	309.714	316.692	96.8642	65.3084	100.04	69.2269	69.926	93.5392	75.8446	99.8629	96.5782	179.937	198.156	192.741	40.0767	37.2173	33.3024	40.4812	43.4193	19.3312	25.5066	28.3935
pgaptmp_003636	pgaptmp_003636	pgaptmp_003636	protein_coding	protein_coding	pgaptmp_003636	0.4863	2124				TRUE	0.521143	0.00176501	0.0141249	Chromosome_II	390377	392500	2124	+	7.96055	299.118	229.711	290.792	245.353	297.67	268.842	344.5	383.597	365.955	167.494	204.996	177.849	271.016	225.317	204.205	207.309	190.405	234.169	225.2	267.606	240.096	5.80292	4.46959	5.71437	6.22302	7.24644	6.19549	7.72267	7.84799
pgaptmp_003530	pgaptmp_003530	pgaptmp_003530	protein_coding	protein_coding	pgaptmp_003530	0.4832	921				TRUE	-0.555126	0.00176729	0.0141249	Chromosome_II	283158	284078	921	-	7.2926	124.119	117.056	122.525	297.242	256.024	228.433	206.403	172.395	192.83	84.7561	94.3343	146.355	97.2123	113.214	117.253	116.295	115.841	123.038	271.582	295.641	255.881	5.5531	5.2526	5.55271	17.3866	14.3736	12.1404	10.6706	8.13396
pgaptmp_002675	pgaptmp_002675	xseA	protein_coding	protein_coding	pgaptmp_002675	0.4887	1332	GO:0006308	GO:0008855	GO:0009318	TRUE	-0.574472	0.00178296	0.0142072	Chromosome_I	2898274	2899605	1332	+	12.1884	4490.62	5104.68	5072.52	5445.17	5670.07	5189.64	4144.4	3965.08	3834.79	4354.85	4607.87	4596.28	4044.62	4682.82	4987.88	3709.64	4043.78	3861.81	6205.03	5649.04	5383.46	138.919	158.382	158.95	220.228	220.104	190.707	148.146	129.356
pgaptmp_003188	pgaptmp_003188	pgaptmp_003188	protein_coding	protein_coding		0.5	1000				TRUE	-1.32689	0.00178298	0.0142072	pgaptmp_003188	1	1000	1000	+	11.5928	1087	1474.2	1673.69	2650.84	2727.5	5181.39	1417.35	1355.28	1085.2	8487.72	7425.2	9872.46	5405.59	2891.38	3493.89	5749.02	4496.5	3984.84	4218.46	3265.43	1894.18	44.7907	60.9252	69.8578	142.806	141.029	253.618	67.4855	58.8932
pgaptmp_004492	pgaptmp_004492	pgaptmp_004492	protein_coding	protein_coding	pgaptmp_004492	0.4206	378				TRUE	0.654404	0.00179182	0.0142463	Chromosome_II	1367616	1367993	378	-	7.48688	144.163	184.825	240.148	231.9	238.955	378.523	293.271	226.875	223.796	96.8642	145.13	127.829	237.139	94.3446	142.285	166.858	238.34	123.038	160.379	145.272	144.556	15.7152	20.2074	26.5173	33.0502	32.6865	49.0155	36.9411	26.0814
pgaptmp_000119	pgaptmp_000119	murI	protein_coding	protein_coding	pgaptmp_000119	0.4659	807	GO:0009252	GO:0008881		TRUE	-0.574224	0.00179329	0.0142463	Chromosome_I	125525	126331	807	+	10.5852	1186.45	1272.65	1246.48	1114.02	1426.9	1480.28	1083.99	961.978	883.922	1886.83	1977.39	1935.96	1692.38	1753.7	1872.1	2895.58	2487.25	2451.5	1488.67	1406.84	1340.88	60.5807	65.1744	64.4695	74.3675	91.4251	89.7849	63.9563	51.7999
pgaptmp_000662	pgaptmp_000662	tyrS	protein_coding	protein_coding	pgaptmp_000662	0.4503	1188	GO:0006437	GO:0000166,GO:0004831,GO:0005524		TRUE	-0.555673	0.00179934	0.0142728	Chromosome_I	685561	686748	1188	+	13.4341	9793.03	10139.8	10680.1	9655.89	8974.48	8295.34	7868.56	7551.79	7654.79	14394.4	13257.6	14400.2	14219.5	14801	15511.7	13043.6	12556.1	12527.4	10972.2	10854	11056.9	339.671	352.741	375.231	437.865	390.604	341.783	315.364	276.23
pgaptmp_001901	pgaptmp_001901	pgaptmp_001901	protein_coding	protein_coding	pgaptmp_001901	0.4723	1338				TRUE	1.54965	0.00180955	0.0143322	Chromosome_I	2043506	2044843	1338	-	7.60359	1085.46	778.903	631.41	509.284	602.85	276.264	455.869	866.452	778.358	60.5401	48.9813	51.8725	54.4978	88.7949	79.0472	30.3378	62.5808	62.1805	134.673	229.377	322.343	33.4284	24.0585	19.6968	20.5054	23.2968	10.1065	16.2225	28.1401
pgaptmp_002508	pgaptmp_002508	pgaptmp_002508	protein_coding	protein_coding	pgaptmp_002508	0.4756	450				TRUE	-0.603492	0.0018178	0.0143661	Chromosome_I	2728203	2728652	450	+	8.65105	521.915	557.994	488.465	529.143	430.12	414.808	469.233	437.331	441.257	258.304	312.029	264.921	229.775	314.112	292.475	239.332	334.208	365.145	622.515	590.008	785.919	47.7909	51.2459	45.3066	63.3468	49.422	45.1199	49.6488	42.2313
pgaptmp_000698	pgaptmp_000698	deoC	protein_coding	protein_coding	pgaptmp_000698	0.4517	777	GO:0009264	GO:0004139	GO:0005737	TRUE	0.673466	0.00181929	0.0143661	Chromosome_I	723188	723964	777	+	14.1474	30345.1	31370.9	31010.2	16881.3	17750.3	18015.7	29831.2	27816	26626	9430.13	11566.8	10995.1	8050.95	8737.42	9140.49	25898.4	20361.4	38424.9	18455.3	16236.7	16488.5	1609.26	1668.58	1665.8	1170.44	1181.21	1134.91	1828.03	1555.65
pgaptmp_003480	pgaptmp_003480	pgaptmp_003480	protein_coding	protein_coding	pgaptmp_003480	0.4534	483		GO:0003677		TRUE	0.531209	0.00183767	0.0144895	Chromosome_II	227550	228032	483	-	6.93066	113.326	137.298	143.762	171.683	199.357	172.356	258.375	246.278	267.429	72.6481	47.1672	81.514	88.3748	82.1353	79.0472	55.6194	74.5643	72.7644	151.438	170.758	190.249	9.66806	11.7479	12.4233	19.1489	21.3417	17.4667	25.4704	22.1573
pgaptmp_001781	pgaptmp_001781	pgaptmp_001781	protein_coding	protein_coding	pgaptmp_001781	0.4209	354				TRUE	-1.02034	0.00184184	0.0145007	Chromosome_I	1900068	1900421	354	+	13.0205	4764.3	6122.09	5857.49	7265.14	6996.61	11251.8	5658.27	4200.91	4457.61	12437	11454.4	12306.8	7642.95	7313.37	8209.05	18644.3	14433.5	11797.1	12080.4	8517.52	7501.13	554.567	714.724	690.636	1105.62	1021.95	1555.79	761.05	515.677
pgaptmp_003466	pgaptmp_003466	uxuA	protein_coding	protein_coding	pgaptmp_003466	0.479	1188	GO:0006064	GO:0008927		TRUE	-0.504314	0.00186067	0.0146271	Chromosome_II	216730	217917	1188	+	7.69736	138.766	124.096	93.9355	194.104	245.1	163.284	134.385	142.543	156.938	314.809	299.33	233.426	212.1	259.725	299.062	320.233	310.241	367.791	191.113	203.253	211.018	4.8131	4.31703	3.30031	8.80204	10.6677	6.72761	5.386	5.21395
pgaptmp_004878	pgaptmp_004878	pgaptmp_004878	protein_coding	protein_coding	pgaptmp_004878	0.4512	1332				TRUE	-0.659177	0.00186747	0.0146587	Chromosome_II	1810983	1812314	1332	-	6.96697	84.0306	106.494	99.6534	160.793	168.634	178.128	161.856	138.065	163.272	94.8462	119.732	100.04	98.6852	94.3446	105.396	60.6757	86.5479	74.0874	267.67	247.854	203.541	2.59951	3.30418	3.12269	6.50319	6.54614	6.54579	5.78571	4.50419
pgaptmp_001304	pgaptmp_001304	pgaptmp_001304	protein_coding	protein_coding	pgaptmp_001304	0.3309	417				TRUE	0.534424	0.00187285	0.0146759	Chromosome_I	1383326	1383742	417	+	8.0553	320.704	294.839	311.213	286.352	260.12	350.484	345.985	313.445	331.471	256.286	241.278	240.837	201.789	194.239	164.682	394.392	276.953	256.66	238.053	216.633	201.049	31.6903	29.2207	31.1503	36.9938	32.2538	41.1401	39.5052	32.6635
pgaptmp_003132	pgaptmp_003132	glnG	protein_coding	protein_coding	pgaptmp_003132	0.485	1404	GO:0006355	GO:0043565		TRUE	0.49777	0.00187524	0.0146759	Chromosome_I	3390851	3392254	1404	+	9.83557	699.998	660.968	638.762	558.611	695.019	611.904	881.297	850.78	883.922	1188.6	1563.77	1239.38	1131.2	1123.26	1212.06	1614.65	1615.12	1614.05	538.693	598.291	654.656	20.5441	19.4561	18.9895	21.4342	25.5961	21.3329	29.8874	26.3322
pgaptmp_003078	pgaptmp_003078	pgaptmp_003078	protein_coding	protein_coding	pgaptmp_003078	0.458	858		GO:0005524,GO:0016887,GO:0042626,GO:0140359		TRUE	0.502664	0.00188192	0.0147063	Chromosome_I	3328038	3328895	858	-	9.21841	772.465	817.629	775.172	587.438	624.015	540.983	705.334	812.718	703.056	405.619	482.556	503.905	658.392	509.461	516.442	581.475	587.194	620.482	493.988	515.46	504.284	37.0979	39.3831	37.7096	36.8841	37.6055	30.8623	39.1418	41.1614
pgaptmp_003679	pgaptmp_003679	pgaptmp_003679	protein_coding	protein_coding	pgaptmp_003679	0.441	288				TRUE	0.744068	0.00189671	0.0148	Chromosome_II	436217	436504	288	-	8.73428	2036.01	1841.2	1650.82	916.07	847.267	767.766	1035.73	1417.22	1247.06	98.8822	139.687	120.418	94.2665	79.9154	72.46	138.206	141.14	355.884	584.515	765.226	786.75	291.303	264.211	239.247	171.356	152.115	130.488	171.232	213.837
pgaptmp_004399	pgaptmp_004399	uhpB	protein_coding	protein_coding	pgaptmp_004399	0.4733	1500	GO:0000160	GO:0000155		TRUE	0.564159	0.00190073	0.0148094	Chromosome_II	1264565	1266064	1500	+	7.27945	127.973	159.301	143.762	238.947	209.598	210.29	212.343	213.441	222.388	119.062	145.13	161.175	145.818	123.203	150.19	126.408	111.846	103.193	146.967	149.095	121.294	3.51549	4.38904	4.00032	8.58172	7.22503	6.86216	6.7403	6.18336
pgaptmp_002139	pgaptmp_002139	pgaptmp_002139	protein_coding	protein_coding	pgaptmp_002139	0.4675	924		GO:0016301		TRUE	0.926725	0.00190913	0.0148528	Chromosome_I	2324504	2325427	924	-	6.98683	285.241	201.547	193.589	140.293	166.586	103.084	173.735	233.591	218.165	54.4861	103.405	75.9562	106.05	96.5645	90.9043	69.1029	107.852	169.343	72.6453	119.148	118.802	12.7203	9.01458	8.74479	8.17954	9.32203	5.46072	8.95258	10.9856
pgaptmp_001980	pgaptmp_001980	pgaptmp_001980	protein_coding	protein_coding	pgaptmp_001980	0.4819	1710				TRUE	0.536408	0.00191537	0.0148794	Chromosome_I	2141224	2142933	1710	+	9.2104	787.112	866.915	928.737	488.144	589.195	597.885	822.643	819.435	745.281	357.187	458.973	463.148	493.426	447.304	503.267	594.959	532.602	750.135	486.724	588.733	514.254	18.967	20.9518	22.6693	15.3786	17.8159	17.1141	22.9059	20.8236
pgaptmp_002416	pgaptmp_002416	pgaptmp_002416	protein_coding	protein_coding	pgaptmp_002416	0.4545	429				TRUE	-0.658313	0.00192024	0.0148931	Chromosome_I	2627811	2628239	429	+	10.0305	1556.49	1586.85	1605.07	1609.21	1259.64	1064.65	1527.98	1173.93	1371.63	734.553	707.507	703.985	378.539	667.072	654.775	674.174	603.172	543.748	2269.89	1850.3	2119.32	149.502	152.869	156.163	202.078	151.821	121.473	169.587	118.911
pgaptmp_004372	pgaptmp_004372	pgaptmp_004372	protein_coding	protein_coding	pgaptmp_004372	0.4325	978				TRUE	0.515261	0.0019245	0.0148931	Chromosome_II	1237231	1238208	978	-	9.32813	612.884	585.278	584.034	904.539	903.251	778.487	886.494	923.917	943.038	585.221	522.467	516.873	477.224	554.968	505.902	611.813	565.89	504.059	569.428	595.105	698.687	25.8224	24.7323	24.9253	49.8256	47.7544	38.9624	43.1588	41.0517
pgaptmp_004742	pgaptmp_004742	pgaptmp_004742	protein_coding	protein_coding	pgaptmp_004742	0.4296	1548				TRUE	1.05944	0.00192561	0.0148931	Chromosome_II	1658966	1660513	1548	-	8.68822	822.575	678.57	577.499	698.263	777.629	410.685	621.437	944.067	956.409	252.25	264.862	259.363	234.193	254.175	204.205	276.411	258.312	239.461	305.11	349.162	511.761	21.8959	18.1161	15.5712	24.3003	25.9744	12.9859	19.1143	26.5014
pgaptmp_005227	pgaptmp_005227	pgaptmp_005227	protein_coding	protein_coding	pgaptmp_005227	0.469	2454				TRUE	1.0222	0.0019352	0.0149247	Chromosome_II	2201327	2203780	2454	-	9.39384	1314.42	753.38	548.093	1074.3	1034.34	703.442	1246.59	1838.88	1749.55	223.998	464.415	344.582	293.11	321.882	285.887	510.687	470.022	1407.66	557.134	777.969	968.691	22.0708	12.6876	9.32226	23.5839	21.7937	14.0309	24.1869	32.5624
pgaptmp_003849	pgaptmp_003849	pgaptmp_003849	protein_coding	protein_coding	pgaptmp_003849	0.4032	186				TRUE	0.884215	0.00193536	0.0149247	Chromosome_II	616099	616284	186	-	5.58706	67.8412	80.9708	47.3762	66.6233	55.9838	81.6422	136.612	85.8243	86.5624	20.18	25.3977	22.2311	32.4041	32.1882	28.984	47.1922	25.2986	29.1058	49.7341	54.7955	48.1853	15.0293	17.9911	10.6313	19.2964	15.563	21.485	34.9711	20.0509
pgaptmp_004311	pgaptmp_004311	pgaptmp_004311	protein_coding	protein_coding	pgaptmp_004311	0.4368	570				TRUE	-0.571865	0.00194483	0.0149615	Chromosome_II	1166775	1167344	570	+	9.05474	296.805	291.319	291.609	568.86	491.565	575.619	412.806	384.343	435.627	504.501	439.017	433.506	506.682	584.936	517.759	1464.64	1165.07	1139.09	670.013	560.061	553.3	21.4563	21.122	21.3534	53.7644	44.5913	49.4302	34.4829	29.301
pgaptmp_001639	pgaptmp_001639	pgaptmp_001639	protein_coding	protein_coding	pgaptmp_001639	0.4118	561				TRUE	1.00037	0.00194581	0.0149615	Chromosome_I	1714842	1715402	561	+	11.016	6596.79	9666.32	10281.4	4846.84	4750.43	8892.4	10744.1	7907.03	7038.3	758.769	674.853	585.419	371.174	258.615	287.205	547.767	500.646	342.654	5023.7	3979.05	3413.68	484.538	712.099	764.949	465.437	437.839	775.87	911.885	612.474
pgaptmp_003171	pgaptmp_003171	edd	protein_coding	protein_coding	pgaptmp_003171	0.5214	1797	GO:0009255	GO:0004456		TRUE	-0.708508	0.00194939	0.0149671	Chromosome_I	3437890	3439686	1797	+	11.9592	2190.19	1680.14	1856.66	1177.44	1411.88	1285.66	1461.9	1820.97	1889.59	5763.42	7363.52	8090.26	8862.52	8340.06	11309	15507.7	16755.7	36097.8	2638.7	2382.33	3190.2	50.2218	38.6402	43.1245	35.2983	40.6251	35.0195	38.7348	44.0343
pgaptmp_001646	pgaptmp_001646	pgaptmp_001646	protein_coding	protein_coding	pgaptmp_001646	0.452	615		GO:0016407		TRUE	0.923468	0.00195498	0.0149881	Chromosome_I	1719397	1720011	615	+	7.25789	649.117	544.792	613.44	418.317	363.895	244.102	510.811	538.827	496.15	66.5941	19.9553	51.8725	39.7687	36.6279	44.7934	37.0796	43.9397	44.9816	174.908	296.915	311.543	43.4917	36.6098	41.633	36.6433	30.5946	19.428	39.5474	38.0725
pgaptmp_001741	pgaptmp_001741	pgaptmp_001741	protein_coding	protein_coding	pgaptmp_001741	0.4689	819	GO:0006629	GO:0016491		TRUE	0.537747	0.00197131	0.0150709	Chromosome_I	1840770	1841588	819	+	7.36927	310.682	286.918	357.772	262.009	252.61	204.518	256.89	277.623	285.726	92.8282	121.546	101.893	126.671	104.334	140.968	55.6194	91.8739	59.5345	195.025	181.59	163.664	15.6311	14.4782	18.2332	17.2344	15.9482	12.2231	14.9347	14.7302
pgaptmp_002752	pgaptmp_002752	pgaptmp_002752	protein_coding	protein_coding	pgaptmp_002752	0.4581	1074	GO:0009073	GO:0016832		TRUE	-0.575642	0.00197408	0.0150709	Chromosome_I	2979758	2980831	1074	-	10.8448	2054.51	1926.58	1948.96	1905.17	1777.83	1291.43	1791.55	1912.76	1967.01	1570.01	1396.87	1530.24	1524.47	1979.02	2010.43	1614.65	1563.19	1512.18	2401.77	2695.81	3114.6	78.8246	74.135	75.7424	95.5639	85.5912	58.8572	79.425	77.3916
pgaptmp_003047	pgaptmp_003047	pgaptmp_003047	protein_coding	protein_coding	pgaptmp_003047	0.3458	801		GO:0015016,GO:0016787		TRUE	-0.664497	0.0019782	0.0150709	Chromosome_I	3300283	3301083	801	-	12.1965	4465.96	5168.05	4855.24	4588.68	4386.54	5049.45	3958.04	3646.41	3955.83	3997.67	3706.25	4153.51	4782.55	3760.46	3881.22	6687.81	6088.98	5449.39	6895.16	5380.16	5470.7	229.742	266.646	252.999	308.617	283.161	308.563	235.278	197.82
pgaptmp_003688	pgaptmp_003688	phnR	protein_coding	protein_coding	pgaptmp_003688	0.5035	705	GO:0006355	GO:0003700		TRUE	0.462415	0.00197932	0.0150709	Chromosome_II	446402	447106	705	+	9.32958	514.205	648.646	663.267	782.183	1037.07	780.137	964.452	975.411	1004.97	502.483	620.43	557.63	651.028	591.596	578.362	310.12	458.038	387.636	658.837	730.819	676.256	30.0542	38.0242	39.2681	59.77	76.0609	54.1644	65.1365	60.1224
pgaptmp_002927	pgaptmp_002927	pgaptmp_002927	protein_coding	protein_coding	pgaptmp_002927	0.4632	801				TRUE	0.637657	0.00198008	0.0150709	Chromosome_I	3185453	3186253	801	-	11.9127	6384.78	8036.35	9124.82	5641.2	5771.11	5855.97	8683.78	8381.67	7613.27	1570.01	1944.74	1961.89	1617.26	1385.2	1580.94	2521.41	2459.29	2333.75	5036.56	5716.58	4610.84	328.452	414.637	475.48	379.405	372.538	357.849	516.189	454.711
pgaptmp_002456	pgaptmp_002456	toxS	protein_coding	protein_coding	pgaptmp_002456	0.4225	516				TRUE	-0.639569	0.00199385	0.0151538	Chromosome_I	2675677	2676192	516	+	11.5908	2523.23	2931.67	3020.64	2917.33	2707.7	3467.73	2329.83	2236.65	2033.86	3955.29	3267.23	4040.5	2928.15	2908.03	3179.02	4125.95	3850.72	3537.67	3745.7	3295.38	2925.18	201.496	234.805	244.338	304.579	271.329	328.949	214.985	188.359
pgaptmp_004418	pgaptmp_004418	pgaptmp_004418	protein_coding	protein_coding	pgaptmp_004418	0.4457	2172	GO:0015891,GO:0055085	GO:0015267		TRUE	-0.614592	0.00201334	0.0152705	Chromosome_II	1286460	1288631	2172	-	9.37075	383.92	339.725	336.534	934.007	964.697	679.527	523.432	613.457	608.752	889.94	966.927	713.248	553.816	589.376	472.966	900.023	782.925	744.843	780.658	806.004	1018.54	7.28347	6.46412	6.46711	23.1662	22.9654	15.3137	11.4745	12.2733
pgaptmp_001713	pgaptmp_001713	potC	protein_coding	protein_coding	pgaptmp_001713	0.4358	771	GO:0055085			TRUE	-0.568545	0.002015	0.0152705	Chromosome_I	1809351	1810121	771	+	11.2899	2150.87	2301.51	2399.85	1838.55	1925.98	2210.11	1500.51	1432.89	1378.66	4714.06	4903.57	5172.43	2679.23	2700.48	2862.83	3824.25	3436.62	2967.46	2313.47	1955.44	1933.23	114.953	123.367	129.918	128.465	129.164	140.311	92.6651	80.76
pgaptmp_004858	pgaptmp_004858	pgaptmp_004858	protein_coding	protein_coding	pgaptmp_004858	0.4606	927		GO:0005524		TRUE	0.690585	0.00201979	0.0152848	Chromosome_II	1782777	1783703	927	+	6.02756	77.0923	62.4883	49.8267	67.2639	78.5139	39.5841	74.9882	91.0483	102.749	68.6121	83.4496	57.4303	75.1186	73.2558	82.9996	37.0796	42.6082	82.0253	55.881	45.2382	52.3392	3.4268	2.78587	2.24348	3.90901	4.37936	2.09013	3.85164	4.26805
pgaptmp_004519	pgaptmp_004519	pgaptmp_004519	protein_coding	protein_coding	pgaptmp_004519	0.4599	1146				TRUE	0.665329	0.00202995	0.0153133	Chromosome_II	1394803	1395948	1146	-	6.45399	78.6341	82.731	79.2326	105.06	103.092	141.018	155.916	125.378	144.271	58.5221	65.3084	72.251	76.5915	51.0571	61.9203	84.2718	79.8904	84.6713	86.0568	94.2993	71.4472	2.82738	2.98349	2.88576	4.93874	4.65141	6.02315	6.47797	4.75417
pgaptmp_004644	pgaptmp_004644	pgaptmp_004644	protein_coding	protein_coding	pgaptmp_004644	0.2838	444				TRUE	0.623147	0.00203101	0.0153133	Chromosome_II	1554826	1555269	444	-	8.73379	1161.78	1408.19	1413.93	1747.58	1415.3	1406.06	1623.01	1440.35	1718.58	72.6481	52.6095	83.3666	73.6457	96.5645	36.8887	229.219	153.123	154.79	1132.15	969.116	895.582	107.82	131.075	132.919	212.04	164.82	155.008	174.049	140.969
pgaptmp_003895	pgaptmp_003895	yqfB	protein_coding	protein_coding	pgaptmp_003895	0.4081	321				TRUE	-0.746621	0.00203487	0.0153133	Chromosome_II	663881	664201	321	-	8.66419	269.052	335.325	371.658	468.925	427.389	476.658	441.762	344.79	361.029	399.565	431.761	383.486	259.233	293.023	310.919	525.856	422.087	384.99	742.1	533.938	601.486	34.5374	43.172	48.3258	78.6979	68.8433	72.6834	65.5264	46.6752
pgaptmp_001873	pgaptmp_001873	pgaptmp_001873	protein_coding	protein_coding	pgaptmp_001873	0.4693	978		GO:0000166,GO:0016491		TRUE	0.595253	0.00203518	0.0153133	Chromosome_I	2008010	2008987	978	-	7.51102	264.427	299.24	307.945	190.261	175.461	164.109	268.77	272.399	254.057	98.8822	121.546	151.912	173.804	163.161	196.301	128.093	127.825	140.237	138.585	182.227	183.603	11.141	12.6451	13.1424	10.4803	9.27656	8.21347	13.085	12.1033
pgaptmp_001325	pgaptmp_001325	pgaptmp_001325	protein_coding	protein_coding	pgaptmp_001325	0.385	387				TRUE	0.631111	0.00203825	0.0153135	Chromosome_I	1396841	1397227	387	+	8.86597	646.033	690.892	808.663	798.839	838.392	889.817	965.937	786.598	806.508	240.142	275.746	196.375	291.637	289.693	277.983	321.918	250.323	220.939	595.692	512.912	483.515	68.7863	73.7803	87.2162	111.202	112.016	112.544	118.842	88.3241
pgaptmp_000299	pgaptmp_000299	metJ	protein_coding	protein_coding	pgaptmp_000299	0.4548	321				TRUE	-0.823708	0.00204103	0.0153135	Chromosome_I	311748	312068	321	-	10.324	886.561	1168.8	1058.61	1313.25	1278.75	1857.98	1167.89	822.42	878.292	1646.69	1717.97	1717.35	1151.82	1380.76	1413.63	1009.58	1189.03	1102.05	1926.22	1420.22	1585.13	113.805	150.479	137.649	220.397	205.98	283.314	173.232	111.334
pgaptmp_000990	pgaptmp_000990	pgaptmp_000990	protein_coding	protein_coding	pgaptmp_000990	0.4246	822				TRUE	-0.548599	0.00206103	0.0154416	Chromosome_I	1048194	1049015	822	-	8.89095	491.078	569.436	595.47	664.311	574.858	657.261	473.688	439.569	425.774	361.223	344.683	437.211	300.474	402.907	400.506	426.415	420.756	343.977	702.424	619.954	583.209	24.6171	28.6295	30.2363	43.5375	36.1604	39.138	27.438	23.2377
pgaptmp_001099	pgaptmp_001099	pgaptmp_001099	protein_coding	protein_coding	pgaptmp_001099	0.4779	747		GO:0016491		TRUE	-0.498468	0.00208383	0.0155903	Chromosome_I	1171121	1171867	747	-	10.1886	1329.07	1396.75	1343.69	1013.44	983.813	663.858	701.622	828.391	780.469	1172.46	1215.46	1165.28	1589.27	1723.73	1828.63	1508.46	1477.97	1533.34	1004.74	1070.42	1098.29	73.3138	77.2749	75.079	73.0875	68.0982	43.4998	44.7214	48.1895
pgaptmp_003142	pgaptmp_003142	pgaptmp_003142	protein_coding	protein_coding	pgaptmp_003142	0.4529	435				TRUE	-0.737454	0.00210431	0.0157212	Chromosome_I	3405726	3406160	435	-	10.1627	742.399	982.21	1097	1091.6	1167.47	1786.23	968.164	785.105	795.952	889.94	1046.75	1117.11	1265.23	913.478	935.392	1997.24	1724.3	1596.85	1598.76	1381.36	1145.65	70.3244	93.3162	105.259	135.188	138.771	200.993	105.972	78.4289
pgaptmp_000086	pgaptmp_000086	pgaptmp_000086	protein_coding	protein_coding	pgaptmp_000086	0.4771	1224				TRUE	-0.483106	0.00211155	0.0157529	Chromosome_I	93834	95057	1224	+	10.6213	1820.15	1802.48	1596.09	1601.52	1689.76	1411.83	1256.98	1381.4	1334.33	1150.26	1190.06	1304.22	1640.83	1737.05	1791.74	1749.48	1624.44	1976.55	1694.87	1892.36	1804.46	61.275	60.8598	54.4272	70.4881	71.3816	56.4592	48.8967	49.0427
pgaptmp_003359	pgaptmp_003359	pgaptmp_003359	protein_coding	protein_coding	pgaptmp_003359	0.4801	831				TRUE	0.628334	0.00212663	0.015843	Chromosome_II	95193	96023	831	+	9.61779	595.152	553.594	516.237	609.859	688.874	611.079	847.886	1109	985.967	1019.09	1173.74	1148.61	1173.91	1057.77	1172.53	645.522	641.786	803.054	564.398	579.813	696.195	29.5111	27.5316	25.9292	39.536	42.863	35.9939	48.5813	57.9919
pgaptmp_004079	pgaptmp_004079	pgaptmp_004079	protein_coding	protein_coding	pgaptmp_004079	0.4493	345				TRUE	0.638979	0.00213109	0.0158537	Chromosome_II	869305	869649	345	+	8.83953	282.929	356.447	351.237	572.063	485.421	649.014	634.801	570.918	555.97	526.699	460.787	476.116	418.307	354.07	376.792	657.32	520.619	547.717	409.608	370.826	306.558	33.7922	42.699	42.4935	89.3284	72.7517	92.0805	87.6095	71.9104
pgaptmp_000217	pgaptmp_000217	frdC	protein_coding	protein_coding	pgaptmp_000217	0.4635	384			GO:0016020	TRUE	1.00899	0.00213422	0.0158546	Chromosome_I	235155	235538	384	-	10.1229	3540.85	2552.34	1932.62	1488.13	1656.98	1122.37	1557.68	2874.74	2261.88	639.707	580.519	498.347	674.594	850.211	790.472	615.184	548.58	574.177	905.272	1118.85	1194.66	379.957	274.694	210.066	208.773	223.116	143.067	193.143	325.315
pgaptmp_004771	pgaptmp_004771	pgaptmp_004771	protein_coding	protein_coding	pgaptmp_004771	0.4529	1020				TRUE	0.504326	0.00214534	0.0158904	Chromosome_II	1697282	1698301	1020	-	5.96333	49.3391	44.0058	44.1089	87.1228	82.6103	87.4149	105.429	102.989	99.9338	44.3961	29.0259	44.4622	50.0791	74.3657	42.1585	58.9902	61.2493	51.5966	63.7044	68.1758	73.1088	1.99319	1.783	1.80496	4.60146	4.18772	4.19486	4.92144	4.38762
pgaptmp_003777	pgaptmp_003777	pgaptmp_003777	protein_coding	protein_coding	pgaptmp_003777	0.4849	1029				TRUE	0.669728	0.00214694	0.0158904	Chromosome_II	532353	533381	1029	-	7.48451	185.792	200.667	213.193	332.476	358.433	236.68	386.078	415.688	433.516	100.9	70.7507	111.155	89.8477	112.104	105.396	80.9009	95.8684	119.069	201.172	296.278	248.404	7.43996	8.05938	8.64765	17.4064	18.0109	11.2585	17.8646	17.5545
pgaptmp_003697	pgaptmp_003697	pgaptmp_003697	protein_coding	protein_coding	pgaptmp_003697	0.4644	786				TRUE	0.615599	0.00214808	0.0158904	Chromosome_II	456241	457026	786	+	7.22096	171.916	144.339	163.366	231.26	217.791	169.882	282.876	252.995	277.985	52.4681	72.5649	92.6295	94.2665	98.7843	142.285	158.431	109.183	144.206	144.732	198.793	164.495	9.01263	7.58933	8.67522	15.8505	14.3272	10.5793	17.1359	13.9871
pgaptmp_001403	pgaptmp_001403	pgaptmp_001403	protein_coding	protein_coding	pgaptmp_001403	0.4567	381				TRUE	0.720083	0.0021596	0.0159276	Chromosome_I	1457833	1458213	381	+	6.27446	98.6781	129.377	107.822	102.497	114.699	125.35	137.355	130.602	137.937	64.5761	45.353	51.8725	67.754	63.2664	48.7458	42.1359	37.2822	31.7517	89.4096	80.2818	59.8163	10.6722	14.0338	11.812	14.4928	15.566	16.1039	17.1653	14.8958
pgaptmp_004619	pgaptmp_004619	hsdR	protein_coding	protein_coding	pgaptmp_004619	0.4652	3549				TRUE	0.720535	0.002161	0.0159276	Chromosome_II	1521412	1524960	3549	-	10.4597	1223.45	977.81	963.044	944.257	1063.69	790.033	1122.6	1504.54	1396.26	1872.71	2175.13	1711.79	2215.26	2361.94	2150.08	2553.43	2428.67	2614.23	681.19	746.111	935.46	14.205	11.3865	11.3261	14.3334	15.4972	10.8961	15.0609	18.4219
pgaptmp_004566	pgaptmp_004566	pgaptmp_004566	protein_coding	protein_coding	pgaptmp_004566	0.5132	984		GO:0016491		TRUE	0.65191	0.00216219	0.0159276	Chromosome_II	1450182	1451165	984	+	5.63569	37.7752	45.7661	51.4603	53.1705	67.5902	70.9215	73.5033	78.3613	66.1534	28.252	23.5836	55.5777	48.6062	34.408	60.6029	37.0796	57.2548	52.9196	37.4403	49.6983	39.8775	1.58187	1.92216	2.18282	2.91098	3.55167	3.52789	3.55668	3.46054
pgaptmp_004467	pgaptmp_004467	pgaptmp_004467	protein_coding	protein_coding	pgaptmp_004467	0.4239	4239				TRUE	0.504365	0.00216933	0.0159544	Chromosome_II	1334180	1338418	4239	-	9.01242	518.831	528.95	498.267	810.37	777.629	684.475	884.267	792.568	857.179	401.583	422.69	340.877	368.228	396.247	391.284	353.941	338.202	340.008	517.458	581.725	628.071	5.04337	5.15695	4.90613	10.2987	9.48534	7.90364	9.93236	8.12476
pgaptmp_001577	pgaptmp_001577	pgaptmp_001577	protein_coding	protein_coding	pgaptmp_001577	0.4859	1665				TRUE	0.430521	0.00217188	0.0159544	Chromosome_I	1642048	1643712	1665	+	9.57216	820.262	752.5	805.395	547.72	641.766	724.884	654.847	641.07	656.608	1134.12	1282.58	1189.36	1119.41	813.583	839.218	896.652	858.821	875.819	467.165	463.851	467.73	20.3	18.6781	20.19	17.7218	19.9299	21.3102	18.7266	16.7313
pgaptmp_000743	pgaptmp_000743	pgaptmp_000743	protein_coding	protein_coding	pgaptmp_000743	0.4764	552		GO:0016746		TRUE	0.531097	0.00217936	0.0159871	Chromosome_I	778110	778661	552	-	9.48091	992.178	1200.48	1229.33	876.993	903.934	964.862	1556.19	1402.29	1400.48	302.701	321.1	313.088	447.766	446.194	474.283	389.336	525.945	451.139	890.185	1075.52	952.906	74.0642	89.8788	92.9545	85.5897	84.6723	85.5577	134.232	110.392
pgaptmp_002710	pgaptmp_002710	pgaptmp_002710	protein_coding	protein_coding	pgaptmp_002710	0.4565	609		GO:0051920		TRUE	-0.924394	0.00218904	0.0160287	Chromosome_I	2934530	2935138	609	+	15.6693	52655.6	57956.6	66959.7	48567.7	39883.7	57893.4	47051.7	40113.5	40074.9	64025.2	61375.4	62726.9	42123.9	51352.3	52692.9	38175.1	37714.9	35797.4	95575.5	74270.2	63766.6	3562.75	3933.03	4589.2	4296.3	3386.27	4653.12	3678.67	2862.27
pgaptmp_004218	pgaptmp_004218	pgaptmp_004218	protein_coding	protein_coding	pgaptmp_004218	0.3987	459		GO:0016746,GO:0120225		TRUE	-0.608434	0.00219113	0.0160287	Chromosome_II	1068531	1068989	459	+	7.98096	185.021	217.389	208.292	360.022	358.433	409.036	267.285	208.217	261.799	240.142	266.676	250.1	231.247	173.15	208.158	180.342	199.726	171.989	393.961	368.277	336.466	16.6099	19.5734	18.9409	42.2552	40.3775	43.6196	27.7264	19.7125
pgaptmp_004432	pgaptmp_004432	pgaptmp_004432	protein_coding	protein_coding		0.5	1000				TRUE	-1.35066	0.00220066	0.0160761	pgaptmp_004432	1	1000	1000	+	11.5739	1034.58	1178.48	1402.5	2561.15	2989.67	4682.47	1669.04	1625.44	1288.58	6766.37	6908.17	7547.46	3180.02	2901.37	3327.89	6643.99	5043.74	4166.09	5428.84	3581.46	2305.42	42.6306	48.7038	58.5387	137.975	154.585	229.196	79.4695	70.633
pgaptmp_002381	pgaptmp_002381	pgaptmp_002381	protein_coding	protein_coding	pgaptmp_002381	0.4599	561				TRUE	-0.615696	0.00221402	0.0161447	Chromosome_I	2592623	2593183	561	+	11.2653	1892.62	2176.53	2256.9	1828.3	1965.58	2300.83	1533.17	1444.09	1328.7	3277.24	3216.44	3469.9	3462.82	3169.98	3412.21	4093.92	3552.46	3773.16	2411.27	2093.06	1894.18	139.014	160.34	167.916	175.569	181.164	200.749	130.125	111.858
pgaptmp_002086	pgaptmp_002086	pgaptmp_002086	protein_coding	protein_coding	pgaptmp_002086	0.4807	1758				TRUE	0.655706	0.00221618	0.0161447	Chromosome_I	2258608	2260365	1758	-	8.69136	932.817	1061.42	1124.78	495.19	553.694	583.041	981.529	1018.7	1014.82	147.314	206.81	166.733	204.735	185.359	162.047	160.116	189.074	213.001	523.046	748.66	576.562	21.8643	24.9523	26.7047	15.1746	16.2853	16.2335	26.5838	25.1804
pgaptmp_004161	pgaptmp_004161	pgaptmp_004161	protein_coding	protein_coding	pgaptmp_004161	0.47	600				TRUE	-0.633475	0.00222873	0.0162137	Chromosome_II	1001787	1002386	600	+	4.24311	10.7929	13.2018	11.4356	15.3746	12.2891	15.6687	22.2737	25.3741	30.9654	24.216	18.1412	20.3785	16.2021	24.4186	15.8094	10.1126	15.9781	2.64598	43.5872	42.6895	43.2006	0.741218	0.909331	0.795518	1.38044	1.05904	1.27825	1.76756	1.83771
pgaptmp_005050	pgaptmp_005050	pgaptmp_005050	protein_coding	protein_coding	pgaptmp_005050	0.4483	348		GO:0003677		TRUE	-1.14926	0.00224796	0.0163311	Chromosome_II	2014305	2014652	348	-	9.49733	319.162	440.058	421.485	494.55	461.525	882.395	562.04	364.193	377.215	849.579	878.035	991.136	815.994	722.569	861.615	1958.48	1291.56	1590.23	1249.5	863.985	704.503	37.7912	52.2604	50.5526	76.5588	68.5741	124.113	76.899	45.4768
pgaptmp_003148	pgaptmp_003148	ubiB	protein_coding	protein_coding	pgaptmp_003148	0.4795	1635	GO:0006744			TRUE	0.599041	0.00229251	0.0166317	Chromosome_I	3410477	3412111	1635	-	13.3616	12600.7	13391	14282.3	10942.9	13341.2	11578.3	12681.9	14570.7	13625.5	7617.96	7588.47	8282.93	14061.9	11192.6	12424.9	7072.09	7806.62	8365.26	7999.93	9267.45	8896.84	317.568	338.482	364.604	360.56	421.912	346.626	369.317	387.258
pgaptmp_001139	pgaptmp_001139	ati2	protein_coding	protein_coding	pgaptmp_001139	0.412	1488				TRUE	-0.58704	0.00229711	0.0166409	Chromosome_I	1209075	1210562	1488	-	11.3684	4661	4917.21	5230.98	2930.78	2844.25	2450.92	3285.37	3994.19	3835.49	2024.06	2869.94	2419.48	745.294	885.729	806.282	1781.51	1746.94	1624.63	5687.01	4978.11	5523.04	129.073	136.571	146.731	106.107	98.8346	80.6228	105.127	116.644
pgaptmp_002279	pgaptmp_002279	pgaptmp_002279	protein_coding	protein_coding	pgaptmp_002279	0.444	2259	GO:0009290	GO:0005215	GO:0016020	TRUE	-0.929204	0.00230851	0.0166409	Chromosome_I	2473775	2476033	2259	-	10.3844	1504.07	1798.08	1936.71	1885.95	1438.51	2214.24	1272.57	1079.15	1129.53	1299.59	1073.96	1181.95	858.709	1035.57	1024.98	928.675	926.728	758.073	2773.37	2051.01	1600.09	27.4353	32.8953	35.784	44.9758	32.9261	47.9778	26.8225	20.7588
pgaptmp_000286	pgaptmp_000286	pgaptmp_000286	protein_coding	protein_coding	pgaptmp_000286	0.4965	987				TRUE	-0.759817	0.00230867	0.0166409	Chromosome_I	300580	301566	987	-	10.7864	1218.06	1510.28	1467.85	2076.21	1829.71	2319.79	1738.84	1513.49	1551.09	1896.92	1692.58	1850.74	1198.95	1266.44	1297.69	2347.81	1866.77	1752.96	3227.69	2454.97	2198.25	50.8521	63.2386	62.0732	113.323	95.854	115.044	83.883	66.6347
pgaptmp_003262	pgaptmp_003262	yidD	protein_coding	protein_coding	pgaptmp_003262	0.4806	258				TRUE	-0.785978	0.00230881	0.0166409	Chromosome_I	3531252	3531509	258	-	13.6018	11855.2	12802.2	13125.7	12400.9	14664.3	15479.9	9421.78	9922.03	9303.7	13833.4	13709.3	14898.5	15459.7	15957.6	17029.4	7166.47	8079.58	7386.25	19546.6	14263.4	13996.2	1893.43	2050.72	2123.45	2589.39	2938.91	2936.84	1738.79	1671.16
pgaptmp_004923	pgaptmp_004923	pgaptmp_004923	protein_coding	protein_coding	pgaptmp_004923	0.4031	129				TRUE	-0.764632	0.00231258	0.0166409	Chromosome_II	1857179	1857307	129	+	6.101	44.7135	41.3655	71.8811	80.7167	77.1484	104.733	66.0787	55.226	55.597	74.6661	58.0519	57.4303	48.6062	51.0571	65.8727	77.53	59.9178	80.7023	124.056	96.2108	83.9089	14.2826	13.2523	23.2577	33.7084	30.923	39.7399	24.3896	18.6034
pgaptmp_004887	pgaptmp_004887	pgaptmp_004887	protein_coding	protein_coding	pgaptmp_004887	0.4193	477				TRUE	-0.466413	0.00231272	0.0166409	Chromosome_II	1819657	1820133	477	-	7.59935	255.946	231.471	261.386	221.01	206.867	184.726	218.282	214.934	199.868	191.71	248.535	179.701	103.104	119.873	97.4916	173.6	142.471	134.945	271.582	279.075	305.728	22.11	20.0548	22.872	24.9608	22.4242	18.9558	21.7888	19.5805
pgaptmp_002818	pgaptmp_002818	btuF	protein_coding	protein_coding	pgaptmp_002818	0.4533	825		GO:0005524,GO:0031419		TRUE	-0.820981	0.0023201	0.0166712	Chromosome_I	3060243	3061067	825	+	8.65473	467.95	372.289	363.49	317.742	390.521	151.739	168.538	239.562	231.537	621.545	556.935	568.745	702.58	1016.7	897.186	365.74	408.772	470.984	321.875	330.685	461.084	23.3724	18.6496	18.3899	20.7484	24.4757	9.00277	9.72694	12.6183
pgaptmp_003817	pgaptmp_003817	pgaptmp_003817	protein_coding	protein_coding	pgaptmp_003817	0.3068	1812				TRUE	-0.95049	0.00232947	0.0166998	Chromosome_II	577302	579113	1812	+	11.7054	1487.11	1774.32	1717.8	3747.56	3674.45	5585.48	3410.11	2521.74	2912.16	3812.01	4680.43	3921.94	2839.78	2162.16	2064.45	5656.32	4291.44	3335.26	7105.83	5034.18	4400.65	33.8176	40.4682	39.5689	111.418	104.852	150.881	89.6071	60.4755
pgaptmp_002539	pgaptmp_002539	pgaptmp_002539	protein_coding	protein_coding		0.5	1000				TRUE	-0.94158	0.0023318	0.0166998	pgaptmp_002539	1	1000	1000	+	13.7888	5244.59	6277.87	7624.3	8522.66	10051.8	15203.6	6702.16	5822.62	4854.53	36396.7	44139.4	44810.5	23971.7	16559.1	20282.2	42855.6	30321.1	26507.4	13015.2	11001.2	8297.01	216.107	259.45	318.23	459.134	519.743	744.182	319.115	253.02
pgaptmp_003934	pgaptmp_003934	pgaptmp_003934	protein_coding	protein_coding	pgaptmp_003934	0.4322	273				TRUE	-0.927416	0.0023418	0.0166998	Chromosome_II	704699	704971	273	+	7.06689	94.0526	128.497	122.525	209.479	265.582	195.446	123.248	112.691	112.602	108.972	110.661	88.9244	89.8477	93.2347	81.6821	128.093	115.841	150.821	292.817	198.793	166.156	14.196	19.4524	18.7328	41.3373	50.3013	35.0427	21.4956	17.9376
pgaptmp_002873	pgaptmp_002873	pgaptmp_002873	protein_coding	protein_coding	pgaptmp_002873	0.4667	1260	GO:0006817,GO:0055085		GO:0016020	TRUE	-0.593717	0.00234211	0.0166998	Chromosome_I	3125345	3126604	1260	+	14.4215	21238.9	20475.9	22004.6	16709.6	18949.8	17991	14561.8	15891.7	14406.7	28998.7	33318.2	35201.1	26119.2	24456.3	28409.6	23574.2	23654.2	22428.6	22109.9	21551.8	21969.2	694.577	671.606	728.927	714.432	777.64	698.903	550.272	548.07
pgaptmp_002011	pgaptmp_002011	pgaptmp_002011	protein_coding	protein_coding	pgaptmp_002011	0.4389	909	GO:0030001,GO:0055085		GO:0043190	TRUE	-0.477307	0.00234239	0.0166998	Chromosome_I	2177335	2178243	909	-	7.84005	252.092	278.997	240.148	231.9	336.586	247.401	227.934	248.517	232.944	177.584	246.721	157.47	190.006	148.731	130.428	195.511	173.096	269.89	293.934	342.153	329.82	11.4275	12.6846	11.027	13.7436	19.1459	13.322	11.9393	11.8804
pgaptmp_002433	pgaptmp_002433	pgaptmp_002433	protein_coding	protein_coding	pgaptmp_002433	0.4705	1290		GO:0046912		TRUE	0.616574	0.00234312	0.0166998	Chromosome_I	2648710	2649999	1290	+	11.0959	3085.23	3266.99	2858.09	2589.34	2838.79	1946.22	2565.19	3129.23	3097.95	1384.35	1652.66	1378.33	1727.73	1866.91	1758.8	2389.95	2027.88	2484.57	1596.52	2021.7	1937.38	98.55	104.665	92.4756	108.134	113.786	73.8473	94.6809	105.411
pgaptmp_003862	pgaptmp_003862	pgaptmp_003862	protein_coding	protein_coding	pgaptmp_003862	0.4229	1317		GO:0016757		TRUE	-0.644726	0.00235412	0.0167556	Chromosome_II	628808	630124	1317	+	6.1781	23.1277	39.6053	34.3069	62.139	62.8111	75.0448	45.2899	59.7038	52.0782	82.7381	101.591	133.387	128.143	94.3446	81.6821	106.182	79.8904	119.069	92.2037	77.096	79.755	0.72361	1.24282	1.08727	2.54181	2.46601	2.78912	1.63738	1.96994
pgaptmp_001533	pgaptmp_001533	pgaptmp_001533	protein_coding	protein_coding	pgaptmp_001533	0.3983	723				TRUE	0.515717	0.00235834	0.016763	Chromosome_I	1591112	1591834	723	-	8.32201	536.562	546.553	642.846	698.904	767.388	691.897	706.077	593.307	662.238	183.638	172.342	138.944	156.129	169.82	121.206	143.262	110.515	100.547	443.695	467.036	412.068	30.5802	31.2417	37.1116	52.0767	54.8808	46.842	46.4993	35.6598
pgaptmp_005216	pgaptmp_005216	pgaptmp_005216	protein_coding	protein_coding	pgaptmp_005216	0.3986	444				TRUE	-0.978517	0.00236484	0.0167865	Chromosome_II	2187986	2188429	444	-	6.63889	34.6915	28.1637	57.995	81.9979	95.5821	130.298	66.8212	41.7927	57.0045	123.098	132.431	151.912	204.735	118.763	142.285	232.59	166.438	181.249	140.261	107.68	86.4013	3.21958	2.62149	5.45191	9.9491	11.1311	14.3644	7.16579	4.0903
pgaptmp_000769	pgaptmp_000769	csdE	protein_coding	protein_coding	pgaptmp_000769	0.4732	429	GO:0016226	GO:0031071		TRUE	-0.603089	0.0023741	0.0168296	Chromosome_I	815756	816184	429	+	9.62429	742.399	709.374	706.559	616.265	691.605	611.904	431.368	555.992	480.668	1093.76	1307.98	1226.42	1084.06	926.797	924.853	947.215	1042.57	996.211	633.691	751.846	789.242	71.308	68.3376	68.7435	77.3882	83.3575	69.8166	47.8766	56.3182
pgaptmp_001571	pgaptmp_001571	pgaptmp_001571	protein_coding	protein_coding	pgaptmp_001571	0.4458	1938		GO:0008484		TRUE	-0.53331	0.00238464	0.0168816	Chromosome_I	1632029	1633966	1938	-	10.5719	1607.37	1727.67	1663.88	1238.94	1310.84	1259.27	1543.57	1589.61	1418.08	1933.25	1873.99	2143.45	923.517	846.881	1044.74	1511.84	1451.34	1521.44	2302.86	1950.98	2137.6	34.176	36.8424	35.8352	34.4397	34.9736	31.8052	37.9232	35.6431
pgaptmp_002898	pgaptmp_002898	pgaptmp_002898	protein_coding	protein_coding	pgaptmp_002898	0.4594	690	GO:0006355	GO:0003677		TRUE	0.559657	0.0023928	0.0169166	Chromosome_I	3151126	3151815	690	-	8.41971	734.689	792.105	700.841	493.269	522.288	453.568	645.195	721.67	686.869	153.368	195.925	161.175	235.666	220.877	155.46	126.408	131.819	177.281	383.344	503.354	458.591	43.8746	47.4434	42.3947	38.5122	39.1386	32.1755	44.522	45.4493
pgaptmp_000425	pgaptmp_000425	pgaptmp_000425	protein_coding	protein_coding	pgaptmp_000425	0.4477	726	GO:0008654	GO:0003841	GO:0016020	TRUE	-0.699651	0.00242268	0.0171049	Chromosome_I	460072	460797	726	+	11.5533	2604.95	2821.65	2964.28	2699.52	2583.45	3195.59	2141.25	1932.17	1917.04	4294.31	3991.07	4368.41	3165.29	3336.47	3454.36	3198.96	3413.98	3118.29	3797.67	2827.07	2802.23	147.85	160.623	170.421	200.316	183.995	215.45	140.431	115.65
pgaptmp_000426	pgaptmp_000426	pgaptmp_000426	protein_coding	protein_coding	pgaptmp_000426	0.4564	390				TRUE	-0.795493	0.00242963	0.017131	Chromosome_I	460882	461271	390	-	11.9277	3001.2	3647.2	4254.87	3862.23	2748.67	4969.45	3621.71	2580.7	2830.52	3902.82	3717.14	3994.19	2998.85	3260.99	3264.65	6649.04	6099.63	4054.96	5945.74	4668.45	4575.94	317.095	386.489	455.368	533.504	364.42	623.701	442.162	287.548
pgaptmp_001878	pgaptmp_001878	pgaptmp_001878	protein_coding	protein_coding	pgaptmp_001878	0.4596	1743	GO:0055085	GO:0005524,GO:0042626,GO:0140359	GO:0016020	TRUE	0.514064	0.00244608	0.0172239	Chromosome_I	2013032	2014774	1743	+	7.93306	377.752	394.292	374.109	255.603	259.437	238.329	296.983	342.551	329.359	193.728	166.899	170.438	216.518	260.835	223.967	208.994	173.096	170.666	193.907	233.837	224.311	8.93034	9.34894	8.95862	7.9001	7.69624	6.69287	8.11273	8.54014
pgaptmp_005304	pgaptmp_005304	pgaptmp_005304	protein_coding	protein_coding	pgaptmp_005304	0.4327	513				TRUE	0.772179	0.002454	0.0172471	Chromosome_II	2290528	2291040	513	-	7.51488	423.237	424.216	417.401	368.991	289.477	271.316	534.569	426.882	498.262	96.8642	36.2824	70.3985	42.7145	69.926	71.1425	126.408	87.8794	96.5782	206.201	287.358	328.989	33.9957	34.1752	33.9607	38.7491	29.177	25.8875	49.6157	36.16
pgaptmp_003813	pgaptmp_003813	pgaptmp_003813	protein_coding	protein_coding	pgaptmp_003813	0.4567	1329	GO:0055085	GO:0022857,GO:0042802	GO:0016020	TRUE	0.51666	0.00245592	0.0172471	Chromosome_II	572198	573526	1329	-	7.07542	126.431	107.374	119.257	148.621	161.124	136.895	189.327	167.917	189.311	127.134	121.546	133.387	154.656	133.192	127.793	97.7553	109.183	138.914	109.527	131.892	122.956	3.92002	3.339	3.74542	6.02449	6.26873	5.04191	6.78296	5.49044
pgaptmp_003596	pgaptmp_003596	pgaptmp_003596	protein_coding	protein_coding	pgaptmp_003596	0.444	1374				TRUE	-0.649119	0.00246134	0.0172622	Chromosome_II	346381	347754	1374	+	9.26888	420.924	396.933	380.643	746.309	852.046	562.424	469.975	550.022	577.787	694.193	761.931	674.343	564.126	740.328	557.283	655.634	633.797	616.513	717.512	748.023	978.661	12.6234	11.9391	11.563	29.2615	32.0642	20.0359	16.2863	17.3952
pgaptmp_004585	pgaptmp_004585	pgaptmp_004585	protein_coding	protein_coding	pgaptmp_004585	0.4432	1893				TRUE	0.630132	0.00248858	0.0174077	Chromosome_II	1473396	1475288	1893	-	9.42294	1285.13	1191.68	1070.87	1267.12	1104.66	938.473	1288.91	1691.86	1466.63	522.663	495.255	413.128	304.893	342.97	229.237	294.951	318.23	273.859	936.007	817.473	1026.02	27.974	26.0166	23.6116	36.0606	30.1731	24.2663	32.4193	38.8374
pgaptmp_000606	pgaptmp_000606	yacG	protein_coding	protein_coding	pgaptmp_000606	0.4776	201	GO:0006355	GO:0008270		TRUE	-0.463771	0.0024887	0.0174077	Chromosome_I	610900	611100	201	-	9.80159	714.645	823.789	897.697	865.462	671.123	761.169	665.984	629.875	708.686	1162.37	843.567	1081.91	994.217	1057.77	1056.6	1210.14	1058.55	1190.69	912.537	918.144	854.874	146.505	169.38	186.412	231.962	172.643	185.361	157.761	136.175
pgaptmp_002531	pgaptmp_002531	pgaptmp_002531	protein_coding	protein_coding		0.5	1000				TRUE	-1.20624	0.00249434	0.017424	pgaptmp_002531	1	1000	1000	+	13.198	3345.8	3687.69	5087.22	8167.76	7660.91	16090.9	4067.92	3724.03	3222.51	31593.9	34557.2	36838.8	16673.4	9229.12	10260.3	18425.2	13576	11578.8	11035.4	8406.02	5135.06	137.867	152.404	212.335	440.015	396.118	787.615	193.689	161.827
pgaptmp_000773	pgaptmp_000773	pgaptmp_000773	protein_coding	protein_coding	pgaptmp_000773	0.4345	801				TRUE	0.738927	0.00249774	0.0174246	Chromosome_I	819091	819891	801	-	13.2954	11025	13090	13267	12996.7	10578.2	20375.1	16770.6	14063.2	13777.5	7349.57	7566.7	6828.65	4364.24	3973.57	3696.78	14049.8	12112.7	24573.2	9543.92	9043.81	7281.8	567.157	675.38	691.321	874.105	682.847	1245.09	996.895	762.94
pgaptmp_003416	pgaptmp_003416	pdxH	protein_coding	protein_coding	pgaptmp_003416	0.489	636	GO:0008615	GO:0004733,GO:0010181		TRUE	0.659988	0.00251344	0.0175109	Chromosome_II	162625	163260	636	+	11.2115	3201.64	4258.01	4949.99	5591.23	3781.64	5750.41	9050.55	7655.52	6905.99	793.075	814.541	900.359	683.432	822.463	795.742	810.694	956.021	837.452	5100.82	4939.24	4430.56	207.431	276.688	324.854	473.603	307.445	442.563	677.565	523.064
pgaptmp_005150	pgaptmp_005150	pgaptmp_005150	protein_coding	protein_coding	pgaptmp_005150	0.4696	675				TRUE	0.750829	0.00252294	0.0175493	Chromosome_II	2117717	2118391	675	+	7.38075	277.532	300.12	359.406	315.82	305.18	257.297	507.098	512.707	494.039	82.7381	36.2824	81.514	44.1874	67.7061	54.0156	92.699	55.9232	85.9943	222.406	363.18	279.143	16.9421	18.3752	22.224	25.2058	23.3774	18.6579	35.7702	33.0067
pgaptmp_002556	pgaptmp_002556	lnt	protein_coding	protein_coding	pgaptmp_002556	0.4767	1521	GO:0042158	GO:0016410	GO:0016020	TRUE	-0.543288	0.00252662	0.0175493	Chromosome_I	2758269	2759789	1521	+	11.6638	2992.72	2529.46	2741.28	1837.91	2306.26	1604.81	1569.55	1853.06	1674.95	5194.34	5364.36	5205.78	6280.5	7514.27	7948.2	4602.92	4816.06	4704.55	2301.74	2240.25	2673.45	81.0766	68.7289	75.2256	65.0966	78.4012	51.6447	49.1338	52.9416
pgaptmp_003678	pgaptmp_003678	pgaptmp_003678	protein_coding	protein_coding	pgaptmp_003678	0.4853	1257	GO:0009401			TRUE	0.721348	0.00252893	0.0175493	Chromosome_II	434951	436207	1257	-	10.2873	4193.82	3648.08	3192.17	1807.16	2171.08	2002.3	2209.55	2998.62	2498.35	345.079	847.195	574.303	469.859	270.824	325.411	615.184	615.156	1878.64	1237.21	1659.79	1632.49	137.478	119.942	105.997	77.4506	89.3068	77.9697	83.6955	103.663
pgaptmp_001338	pgaptmp_001338	pgaptmp_001338	protein_coding	protein_coding	pgaptmp_001338	0.393	939				TRUE	0.451247	0.00253925	0.0175977	Chromosome_I	1410164	1411102	939	+	8.0473	279.845	299.24	270.371	365.787	381.646	347.185	376.426	339.566	369.474	183.638	166.899	151.912	268.07	284.144	243.729	269.67	211.709	162.728	253.141	263.783	246.742	12.2803	13.1703	12.0181	20.9859	21.0155	18.0979	19.0874	15.7143
pgaptmp_001751	pgaptmp_001751	pgaptmp_001751	protein_coding	protein_coding	pgaptmp_001751	0.4237	963	GO:0009966	GO:0009975		TRUE	0.560711	0.00254523	0.017616	Chromosome_I	1847518	1848480	963	-	9.78314	1778.52	2389.52	2223.41	1875.06	2004.49	2408.86	2205.84	1914.25	1976.86	359.205	335.612	294.562	273.962	247.516	246.364	448.326	367.496	414.096	1450.11	1348.22	1197.16	76.101	102.548	96.3685	104.895	107.627	122.438	109.064	86.3795
pgaptmp_001207	pgaptmp_001207	pgaptmp_001207	protein_coding	protein_coding	pgaptmp_001207	0.464	903				TRUE	-0.558767	0.00255501	0.0176604	Chromosome_I	1286420	1287322	903	-	12.1537	4271.68	4569.57	5034.95	4541.27	4234.97	4910.9	3736.79	3106.84	3262.63	5436.5	4812.86	5292.85	5790.02	5524.15	5906.15	3745.04	4198.24	4200.49	4612.42	5178.81	4648.22	194.926	209.136	232.728	270.928	242.497	266.199	197.035	149.509
pgaptmp_001382	pgaptmp_001382	pgaptmp_001382	protein_coding	protein_coding	pgaptmp_001382	0.4121	495				TRUE	0.516658	0.00255835	0.0176604	Chromosome_I	1443705	1444199	495	+	8.05104	417.84	535.111	486.831	294.039	291.525	402.438	337.818	302.997	302.617	244.178	195.925	174.144	253.341	209.778	171.269	220.792	239.671	166.697	230.23	193.696	208.526	34.7827	44.6766	41.0501	32.0011	30.452	39.7948	32.4945	26.5993
pgaptmp_004465	pgaptmp_004465	pgaptmp_004465	protein_coding	protein_coding	pgaptmp_004465	0.4174	714				TRUE	0.664791	0.00257413	0.017746	Chromosome_II	1332884	1333597	714	-	9.0035	463.325	418.936	411.683	737.981	759.878	536.035	600.648	718.685	757.245	558.987	498.883	453.885	459.549	607.135	491.41	493.833	388.8	416.742	362.109	395.675	506.777	26.739	24.2488	24.0661	55.6815	55.0287	36.7475	40.0548	43.7399
pgaptmp_001898	pgaptmp_001898	pgaptmp_001898	protein_coding	protein_coding	pgaptmp_001898	0.4604	1212				TRUE	-0.56949	0.00258909	0.0178258	Chromosome_I	2039582	2040793	1212	-	10.3454	1334.47	1349.22	1467.85	951.944	869.797	733.13	978.559	1123.92	1090.12	1509.47	1665.36	1728.47	1405.16	1414.06	1401.77	1361.83	1450.01	1510.85	1322.14	1536.82	1749.63	45.3695	46.0067	50.5497	42.3129	37.1073	29.6082	38.443	40.2969
pgaptmp_001575	pgaptmp_001575	pgaptmp_001575	protein_coding	protein_coding	pgaptmp_001575	0.4774	1881		GO:0008773		TRUE	0.779755	0.00259521	0.0178331	Chromosome_I	1639196	1641076	1881	+	7.84639	363.876	309.801	274.455	181.292	208.232	162.46	198.979	255.98	266.725	260.322	286.631	274.183	322.568	264.165	245.046	276.411	225.024	234.169	114.556	117.237	168.649	7.97117	6.80669	6.09009	5.19224	5.72405	4.22756	5.03675	5.91364
pgaptmp_004248	pgaptmp_004248	pgaptmp_004248	protein_coding	protein_coding	pgaptmp_004248	0.4691	1761				TRUE	0.456569	0.00259692	0.0178331	Chromosome_II	1099406	1101166	1761	-	9.50579	588.985	668.009	666.534	847.525	893.693	931.051	1067.65	976.158	1022.56	577.149	702.065	548.367	567.072	576.057	588.902	819.122	585.863	797.762	731.483	742.288	685.395	13.7817	15.6771	15.7981	25.9273	26.2405	25.879	28.8671	24.0878
pgaptmp_005314	pgaptmp_005314	pgaptmp_005314	protein_coding	protein_coding	pgaptmp_005314	0.4524	966				TRUE	0.68767	0.00260152	0.0178414	Chromosome_II	2299587	2300552	966	-	10.7235	1581.93	2118.44	2238.12	3061.47	2457.83	4040.88	4281.75	3595.66	3568.76	845.543	792.771	974.463	1067.86	923.467	922.218	965.755	794.909	906.247	2634.79	2286.76	1948.18	67.4791	90.6319	96.7045	170.733	131.558	204.753	211.046	161.748
pgaptmp_002808	pgaptmp_002808	pgaptmp_002808	protein_coding	protein_coding	pgaptmp_002808	0.441	195				TRUE	0.500945	0.00263926	0.0180565	Chromosome_I	3042097	3042291	195	+	8.53368	487.994	529.83	546.46	299.805	256.706	330.692	504.871	475.392	429.997	322.881	299.33	314.94	369.701	295.243	291.157	424.73	416.761	402.189	294.493	318.579	348.097	103.119	112.291	116.967	82.8263	68.0684	83.0084	123.276	105.939
pgaptmp_004789	pgaptmp_004789	pgaptmp_004789	protein_coding	protein_coding	pgaptmp_004789	0.4553	615		GO:0015035		TRUE	-0.627878	0.00263974	0.0180565	Chromosome_II	1714425	1715039	615	+	10.2488	892.729	1043.82	1119.88	1986.53	2115.78	2293.4	1837.58	1536.63	1712.25	845.543	912.503	917.033	767.388	766.966	847.123	547.767	637.791	625.774	2665.52	2795.85	2159.2	59.814	70.1442	76.0038	174.014	177.885	182.532	142.267	108.575
pgaptmp_004623	pgaptmp_004623	pgaptmp_004623	protein_coding	protein_coding	pgaptmp_004623	0.4249	2937				TRUE	0.511032	0.00266855	0.0182299	Chromosome_II	1529277	1532213	2937	-	10.1993	1241.19	1333.38	1083.93	1348.48	1416.66	966.512	1183.48	1360.5	1385.7	1321.79	1500.28	1343.13	1154.76	1397.41	1050.01	1196.66	1114.47	947.26	890.185	817.473	959.553	17.4137	18.7625	15.4042	24.7346	24.9406	16.1078	19.1862	20.1295
pgaptmp_001278	pgaptmp_001278	pgaptmp_001278	protein_coding	protein_coding	pgaptmp_001278	0.4364	582				TRUE	0.55399	0.00268769	0.0183369	Chromosome_I	1363869	1364450	582	+	8.06908	462.554	411.015	400.247	399.74	372.088	272.141	412.806	420.166	460.259	201.8	177.784	146.355	215.045	244.186	151.507	187.083	165.107	133.622	239.171	287.358	322.343	32.7489	29.1861	28.7042	37.0014	33.0572	22.8878	33.7719	31.3715
pgaptmp_004229	pgaptmp_004229	pgaptmp_004229	protein_coding	protein_coding	pgaptmp_004229	0.5004	1155		GO:0016627		TRUE	0.704922	0.00269531	0.0183513	Chromosome_II	1079889	1081043	1155	+	4.04784	9.25107	15.8421	7.35148	10.2497	16.3855	4.94801	14.1067	22.3889	21.1128	10.09	16.3271	25.9363	32.4041	28.8583	25.0316	25.2815	25.2986	33.0747	8.94096	8.28305	9.1386	0.330041	0.566856	0.265665	0.478074	0.733537	0.209692	0.581535	0.842343
pgaptmp_000081	pgaptmp_000081	pgaptmp_000081	protein_coding	protein_coding	pgaptmp_000081	0.4919	1551				TRUE	-0.574518	0.00269677	0.0183513	Chromosome_I	89008	90558	1551	-	9.37313	632.928	461.181	474.579	304.289	377.549	281.212	325.196	307.475	353.991	1004.97	925.202	965.2	1540.67	1931.29	1839.17	1109.02	1268.93	1471.16	459.901	416.701	559.116	16.8151	12.2886	12.7714	10.5691	12.5865	8.87472	9.98313	8.6146
pgaptmp_001840	pgaptmp_001840	pgaptmp_001840	protein_coding	protein_coding	pgaptmp_001840	0.4525	948	GO:0009245	GO:0016746		TRUE	-0.51601	0.00271388	0.0184259	Chromosome_I	1970332	1971279	948	-	8.67843	536.562	501.667	522.772	524.658	512.047	426.354	415.776	336.58	403.254	462.123	480.742	466.853	219.464	433.985	407.093	202.252	278.285	216.97	502.37	565.159	543.331	23.3222	21.87	23.0168	29.8148	27.9284	22.0138	20.8826	15.4283
pgaptmp_003985	pgaptmp_003985	pgaptmp_003985	protein_coding	protein_coding	pgaptmp_003985	0.4211	456		GO:0003677		TRUE	0.664406	0.00271474	0.0184259	Chromosome_II	753661	754116	456	+	8.38615	353.854	362.608	437.821	529.783	462.891	532.736	691.97	566.44	619.308	244.178	221.323	237.132	166.439	179.81	183.126	289.895	230.351	216.97	444.254	371.463	322.343	31.9755	32.8635	40.075	62.5889	52.4877	57.1847	72.2529	53.9792
pgaptmp_002663	pgaptmp_002663	sufA	protein_coding	protein_coding	pgaptmp_002663	0.4516	372				TRUE	-0.627493	0.00272777	0.0184906	Chromosome_I	2882253	2882624	372	-	6.70825	115.638	110.895	114.356	118.513	100.361	114.629	90.5798	67.1668	92.8963	92.8282	103.405	90.777	85.429	107.664	77.7298	101.126	133.151	103.193	130.762	133.166	122.125	12.8091	12.32	12.8309	17.1627	13.9498	15.0829	11.5937	7.84602
pgaptmp_004845	pgaptmp_004845	pgaptmp_004845	protein_coding	protein_coding	pgaptmp_004845	0.4372	915	GO:0000160,GO:0006935	GO:0000156		TRUE	0.560845	0.00273802	0.0185362	Chromosome_II	1770267	1771181	915	+	11.5563	7677.62	8596.1	8419.89	6719.98	6007.34	5037.08	13214.3	11791.5	11460	895.994	950.6	848.487	639.245	759.196	781.25	881.483	655.101	689.277	8078.72	7977.85	7896.58	345.751	388.259	384.084	395.65	339.473	269.457	687.629	559.997
pgaptmp_004249	pgaptmp_004249	pgaptmp_004249	protein_coding	protein_coding	pgaptmp_004249	0.481	420		GO:0016790		TRUE	0.586921	0.00274383	0.0185517	Chromosome_II	1101461	1101880	420	+	5.74442	56.2774	73.9298	60.4455	99.9349	93.5339	68.4475	104.686	98.5113	80.9323	34.3061	27.2118	24.0837	36.8228	37.7378	32.9363	37.0796	35.9507	35.7207	61.4691	56.707	58.1547	5.52132	7.27465	6.00697	12.8184	11.515	7.97703	11.8679	10.1923
pgaptmp_001524	pgaptmp_001524	hppD	protein_coding	protein_coding	pgaptmp_001524	0.4823	1074	GO:0006559,GO:0006572	GO:0003868		TRUE	0.581276	0.0027538	0.0185952	Chromosome_I	1584034	1585107	1074	+	4.79918	44.7135	51.0468	35.1237	25.6243	28.6746	31.3374	32.6681	41.7927	38.7068	28.252	36.2824	20.3785	16.2021	22.1987	39.5236	11.798	10.652	23.8138	21.7936	22.3005	22.4311	1.71551	1.96429	1.36501	1.28532	1.3805	1.42821	1.44828	1.69096
pgaptmp_001853	pgaptmp_001853	pgaptmp_001853	protein_coding	protein_coding	pgaptmp_001853	0.4604	480				TRUE	-0.75843	0.00276083	0.0186188	Chromosome_I	1983054	1983533	480	-	12.3444	3491.51	4048.54	5061.9	5515	4990.75	8936.93	4649.27	3698.65	3620.14	6193.25	6685.04	6971.3	5302.49	4630.65	5387.07	3841.11	6073	4084.07	7791.49	5982.27	5836.24	299.73	348.577	440.163	618.968	537.612	911.339	461.186	334.842
pgaptmp_002288	pgaptmp_002288	pgaptmp_002288	protein_coding	protein_coding	pgaptmp_002288	0.4775	1290				TRUE	-0.598879	0.00278581	0.0187191	Chromosome_I	2485689	2486978	1290	-	12.8727	5886.77	5579.94	5961.23	4862.86	5700.11	4783.9	4742.82	4724.81	5137.44	11557.1	12840.4	13598	10594.7	10567.7	11880.8	8597.41	10723.9	8924.88	6003.3	7593	7878.3	188.038	178.765	192.88	203.08	228.474	181.52	175.057	159.159
pgaptmp_000762	pgaptmp_000762	pgaptmp_000762	protein_coding	protein_coding	pgaptmp_000762	0.4189	1017				TRUE	-0.635278	0.00278696	0.0187191	Chromosome_I	809025	810041	1017	+	8.61607	399.338	438.298	365.94	347.21	359.798	432.126	334.848	254.488	315.284	512.573	357.382	351.992	449.239	473.943	404.458	380.908	383.474	391.605	518.017	415.427	437.822	16.18	17.8111	15.0186	18.3923	18.2929	20.798	15.6769	10.8738
pgaptmp_001329	pgaptmp_001329	pgaptmp_001329	protein_coding	protein_coding	pgaptmp_001329	0.3829	1191				TRUE	0.679503	0.0027887	0.0187191	Chromosome_I	1400022	1401212	1191	+	8.49747	520.373	444.459	426.386	440.098	475.862	338.114	437.307	451.51	511.633	359.205	382.78	250.1	393.268	369.609	223.967	389.336	386.137	195.802	240.288	250.403	351.421	18.0037	15.4227	14.9428	19.9068	20.6592	13.8958	17.4827	16.4738
pgaptmp_005115	pgaptmp_005115	pgaptmp_005115	protein_coding	protein_coding	pgaptmp_005115	0.4029	546	GO:0006355	GO:0003677,GO:0003700		TRUE	-0.601573	0.00279319	0.0187191	Chromosome_II	2084521	2085066	546	+	8.63401	232.048	247.313	249.95	461.238	445.14	513.769	369.744	325.386	325.137	498.447	480.742	500.2	427.145	361.839	389.966	461.809	426.082	343.977	577.81	491.885	438.653	17.5123	18.7196	19.1074	45.509	42.1548	46.0583	32.2434	25.8966
pgaptmp_000789	pgaptmp_000789	pgaptmp_000789	protein_coding	protein_coding	pgaptmp_000789	0.4418	1005	GO:0017013	GO:0016740,GO:0046872	GO:0005886	TRUE	-0.506806	0.00279434	0.0187191	Chromosome_I	834223	835227	1005	+	11.9339	3033.58	3256.43	3329.4	2882.1	2574.57	3112.3	2770.11	2621.74	2492.01	6138.77	5761.65	6658.21	4760.46	4992.49	5171.01	5497.89	5077.03	5232.42	3838.47	3383.31	3642.15	124.379	133.911	138.274	154.492	132.459	151.582	131.239	113.36
pgaptmp_005092	pgaptmp_005092	pgaptmp_005092	protein_coding	protein_coding	pgaptmp_005092	0.4357	1407		GO:0008270,GO:0016805		TRUE	0.680524	0.00280547	0.0187191	Chromosome_II	2054189	2055595	1407	-	9.29805	2365.19	3169.3	3196.26	2745.65	2484.45	3087.56	4511.17	3684.47	3701.07	113.008	50.7954	61.1355	86.9019	62.1564	79.0472	92.699	83.8849	109.808	2496.21	2674.15	2009.66	69.2676	93.0917	94.8176	105.127	91.302	107.412	152.661	113.794
pgaptmp_004663	pgaptmp_004663	pgaptmp_004663	protein_coding	protein_coding	pgaptmp_004663	0.4574	282				TRUE	-0.668246	0.00280756	0.0187191	Chromosome_II	1577375	1577656	282	-	6.41859	49.3391	59.8479	64.5296	114.028	103.092	123.7	66.8212	64.1816	63.3384	60.5401	87.0778	114.861	72.1728	71.0359	63.2378	161.802	111.846	101.87	109.527	118.511	82.2474	7.20941	8.77085	9.55105	21.7835	18.9025	21.4711	11.2823	9.89006
pgaptmp_004571	pgaptmp_004571	pgaptmp_004571	protein_coding	protein_coding	pgaptmp_004571	0.4583	168				TRUE	-0.742708	0.00280874	0.0187191	Chromosome_II	1457818	1457985	168	+	7.36199	57.0483	63.3684	59.6287	107.622	152.249	244.927	97.2619	73.8835	78.1173	447.997	487.999	435.359	285.745	143.182	181.809	352.256	300.92	312.225	168.202	125.52	122.956	13.9924	15.5885	14.8145	34.511	46.8585	71.3607	27.5655	19.1107
pgaptmp_002457	pgaptmp_002457	pgaptmp_002457	protein_coding	protein_coding	pgaptmp_002457	0.4815	756				TRUE	-0.556427	0.00280984	0.0187191	Chromosome_I	2676239	2676994	756	+	9.13242	598.236	658.327	695.94	827.666	881.404	613.553	452.156	494.049	487.705	415.709	304.772	357.55	646.609	579.387	636.33	473.607	472.685	510.674	660.514	786.889	604.809	32.6069	35.9883	38.423	58.979	60.2833	39.725	28.4774	28.3979
pgaptmp_004375	pgaptmp_004375	modC	protein_coding	protein_coding	pgaptmp_004375	0.4463	1107	GO:0015689	GO:0005524,GO:0015098	GO:0016020	TRUE	0.488516	0.00281361	0.0187191	Chromosome_II	1239928	1241034	1107	-	9.99779	1295.15	1364.18	1481.73	1787.94	1783.97	1433.27	1932.62	2261.28	2064.13	597.329	526.095	687.311	568.545	547.199	632.378	562.935	456.707	443.201	1349.53	1461	1509.53	48.2093	50.9291	55.8679	87.01	83.3267	63.3745	83.1248	88.7656
pgaptmp_004173	pgaptmp_004173	pgaptmp_004173	protein_coding	protein_coding	pgaptmp_004173	0.3753	762				TRUE	-0.764274	0.00281479	0.0187191	Chromosome_II	1012752	1013513	762	+	8.72024	207.378	274.596	251.584	476.613	477.228	607.781	335.591	266.428	303.32	603.383	553.307	444.622	346.135	422.886	403.141	854.516	551.243	477.599	625.867	433.904	441.145	11.2142	14.893	13.7806	33.6957	32.3828	39.0413	20.9695	15.1937
pgaptmp_000951	pgaptmp_000951	truA	protein_coding	protein_coding	pgaptmp_000951	0.4679	795	GO:0001522,GO:0009451	GO:0003723,GO:0009982		TRUE	-0.567562	0.00283658	0.0188171	Chromosome_I	1004712	1005506	795	+	10.923	1982.04	1696.87	1697.37	1285.06	1568.91	1081.14	1105.52	1273.93	1297.03	2714.21	3205.55	3134.58	2474.5	2899.15	2997.21	2376.46	2676.33	2426.36	1641.23	1614.56	2040.4	102.732	88.2108	89.1151	87.0805	102.041	66.5653	66.2113	69.6331
pgaptmp_001886	pgaptmp_001886	pgaptmp_001886	protein_coding	protein_coding	pgaptmp_001886	0.4491	216				TRUE	0.519596	0.00283667	0.0188171	Chromosome_I	2026397	2026612	216	-	9.46478	1950.43	2418.56	2722.5	1339.51	889.596	1037.43	1742.55	1489.61	1499.01	276.466	293.888	294.562	191.479	221.987	260.856	364.054	346.192	263.275	985.182	1038.57	1172.23	372.08	462.748	526.083	334.085	212.953	235.093	384.117	299.679
pgaptmp_000445	pgaptmp_000445	pgaptmp_000445	protein_coding	protein_coding	pgaptmp_000445	0.4178	450				TRUE	-0.674919	0.00286282	0.0189667	Chromosome_I	480138	480587	450	-	9.53912	643.72	763.941	797.227	614.344	574.175	658.086	576.889	476.138	541.895	795.093	834.496	950.379	667.23	510.571	636.33	1361.83	1239.63	1144.39	918.684	889.472	667.118	58.9445	70.1599	73.9453	73.5467	65.9745	71.5818	61.0397	45.9788
pgaptmp_005130	pgaptmp_005130	pgaptmp_005130	protein_coding	protein_coding	pgaptmp_005130	0.4594	801	GO:0009058	GO:0016853	GO:0005737	TRUE	0.503199	0.00288326	0.0190636	Chromosome_II	2099128	2099928	801	-	7.71159	212.004	195.386	178.886	267.134	294.256	182.252	266.542	317.177	323.729	183.638	174.156	179.701	212.1	205.338	188.396	195.511	153.123	144.206	189.995	208.988	216.003	10.9061	10.081	9.32148	17.9664	18.9949	11.1371	15.844	17.207
pgaptmp_001676	pgaptmp_001676	pgaptmp_001676	protein_coding	protein_coding	pgaptmp_001676	0.4114	666				TRUE	0.607911	0.0028847	0.0190636	Chromosome_I	1766940	1767605	666	+	7.34824	144.163	216.509	202.574	201.151	196.626	230.083	249.466	208.217	215.35	169.512	130.617	177.849	144.346	115.433	121.206	114.61	129.156	121.715	151.996	149.095	118.802	8.91942	13.4352	12.6955	16.2709	15.2655	16.9099	17.8348	13.5856
pgaptmp_002528	pgaptmp_002528	pth	protein_coding	protein_coding	pgaptmp_002528	0.467	591		GO:0004045		TRUE	-0.796866	0.00291107	0.0192138	Chromosome_I	2748092	2748682	591	+	12.3708	4980.16	3649.84	3577.72	3292.09	3944.81	2128.47	1997.21	2623.24	2634.88	10691.4	11985.9	11660.2	8432.43	10697.6	10455.3	9836.2	7873.19	9034.69	3489.21	3621.6	5143.37	347.227	255.228	252.673	300.088	345.13	176.284	160.905	192.88
pgaptmp_000474	pgaptmp_000474	pgaptmp_000474	protein_coding	protein_coding		0.5	1000				TRUE	-1.45958	0.00292105	0.0192555	pgaptmp_000474	1	1000	1000	+	13.6089	4092.83	4844.16	6243.04	9504.07	8340.91	15805.6	5330.1	5027.06	3921.35	43320.5	31861.4	39652.9	17284.6	15659	16680.3	34492.4	23318.7	20585.7	18350.2	12708.1	6883.02	168.648	200.198	260.578	512.005	431.278	773.649	253.786	218.45
pgaptmp_004676	pgaptmp_004676	pgaptmp_004676	protein_coding	protein_coding	pgaptmp_004676	0.4534	1008				TRUE	-0.427006	0.00292481	0.0192562	Chromosome_II	1588950	1589957	1008	-	8.88027	417.069	367.009	347.97	561.814	561.886	494.801	424.686	412.703	418.737	512.573	502.512	559.482	416.835	422.886	443.982	576.419	434.071	464.369	569.986	539.672	533.362	17.0493	15.0473	14.4086	30.0259	28.8225	24.0272	20.0604	17.7916
pgaptmp_000191	pgaptmp_000191	pgaptmp_000191	protein_coding	protein_coding	pgaptmp_000191	0.4712	486				TRUE	0.682665	0.00292998	0.0192662	Chromosome_I	208319	208804	486	-	7.51368	373.127	402.213	455.792	205.635	184.337	198.745	338.561	263.443	280.096	62.5581	56.2378	70.3985	154.656	167.6	168.634	182.027	139.808	149.498	159.82	210.262	154.525	31.6358	34.2028	39.1445	22.7943	19.6119	20.0167	33.169	23.5553
pgaptmp_005174	pgaptmp_005174	pgaptmp_005174	protein_coding	protein_coding	pgaptmp_005174	0.4732	765		GO:0004324		TRUE	0.81233	0.00293675	0.0192866	Chromosome_II	2141263	2142027	765	-	8.44757	488.765	466.462	490.099	347.85	393.935	318.322	843.431	964.217	931.778	201.8	185.04	168.586	276.908	202.008	208.158	178.656	221.03	187.864	351.492	587.459	568.255	26.3267	25.1998	26.7401	24.496	26.6261	20.3675	52.4954	54.771
pgaptmp_000874	pgaptmp_000874	pgaptmp_000874	protein_coding	protein_coding	pgaptmp_000874	0.4653	288				TRUE	0.730839	0.00295417	0.0193542	Chromosome_I	920871	921158	288	+	10.2505	6399.43	8735.16	8183.01	8447.06	7447.21	11364.8	11322.5	7830.16	8578.83	110.99	92.5202	122.271	100.158	114.323	71.1425	112.924	110.515	116.423	4901.88	5838.27	5458.23	915.603	1253.49	1185.94	1580.07	1337.04	1931.53	1871.9	1181.45
pgaptmp_002872	pgaptmp_002872	pgaptmp_002872	protein_coding	protein_coding	pgaptmp_002872	0.4464	681				TRUE	-0.661699	0.00295439	0.0193542	Chromosome_I	3124534	3125214	681	+	14.2227	18282.4	19758.6	20700.1	15327.8	18085.5	19783	14443	14036.4	13350.3	23265.6	27658.1	26293.8	19089	18584.8	20809.2	18587	19810.1	16602.2	24509.4	19634.6	19937.9	1106.23	1199.09	1268.72	1212.55	1373.18	1421.93	1009.82	895.664
pgaptmp_000777	pgaptmp_000777	pgaptmp_000777	protein_coding	protein_coding	pgaptmp_000777	0.4359	663	GO:0045892	GO:0016989		TRUE	-0.464026	0.00296331	0.0193885	Chromosome_I	822772	823434	663	+	9.79266	417.069	413.655	460.693	458.035	388.473	365.328	373.456	360.462	362.436	1481.21	2730.25	1767.37	3079.86	1769.24	2478.13	2191.07	4061.09	3060.07	491.194	529.478	451.945	25.9211	25.785	29.0027	37.2177	30.2964	26.9713	26.82	23.6256
pgaptmp_001265	pgaptmp_001265	pgaptmp_001265	protein_coding	protein_coding	pgaptmp_001265	0.4928	1518				TRUE	0.838011	0.0029766	0.0194513	Chromosome_I	1352446	1353963	1518	+	10.777	2388.32	1825.36	1696.56	1342.72	1465.14	1227.93	1824.22	2428.45	2503.27	1685.03	1721.6	1804.42	2321.31	2142.18	2301.59	1533.75	1877.42	2259.67	946.624	1185.75	1530.3	64.8304	49.6957	46.6485	47.6515	49.9057	39.5945	57.2187	69.5177
pgaptmp_000116	pgaptmp_000116	trmA	protein_coding	protein_coding	pgaptmp_000116	0.4631	1110	GO:0006396	GO:0030697		TRUE	-0.49661	0.00298447	0.019461	Chromosome_I	121312	122421	1110	-	11.272	2785.34	2939.59	2734.75	2313.24	2298.75	1711.19	2087.05	2332.93	2166.88	2643.58	2918.92	3280.94	1888.28	2284.25	2272.61	2629.28	2370.08	1997.71	3051.1	2762.71	3204.32	103.398	109.447	102.834	112.269	107.081	75.4584	89.5245	91.3305
pgaptmp_003118	pgaptmp_003118	gspC	protein_coding	protein_coding	pgaptmp_003118	0.4535	924	GO:0015628		GO:0015627	TRUE	-0.470298	0.00298727	0.019461	Chromosome_I	3374482	3375405	924	-	11.4987	2781.49	2974.8	2998.59	2741.16	2846.98	2449.27	2159.07	2053.07	2225.99	2990.68	3425.06	3399.5	3048.93	3179.97	3259.38	3711.33	3392.68	3139.45	3004.72	2706.01	2939.3	124.041	133.054	135.452	159.819	159.315	129.747	111.257	96.5535
pgaptmp_000265	pgaptmp_000265	trpS	protein_coding	protein_coding	pgaptmp_000265	0.4875	1038	GO:0006436	GO:0000166,GO:0004830,GO:0005524		TRUE	-0.51646	0.00298917	0.019461	Chromosome_I	277506	278543	1038	+	12.6976	5651.63	6314.84	6517.49	6292.06	6187.58	6283.97	5535.76	5118.86	5133.22	6477.79	7300.03	6975.01	8145.21	7698.52	8550.28	7009.73	6823.97	6834.56	7599.82	7362.35	6925.39	224.355	251.424	262.074	326.557	308.224	296.326	253.929	214.296
pgaptmp_004675	pgaptmp_004675	pgaptmp_004675	protein_coding	protein_coding	pgaptmp_004675	0.3881	219				TRUE	-1.00366	0.00300538	0.0195424	Chromosome_II	1588505	1588723	219	-	7.90267	196.585	225.31	209.926	195.386	154.297	289.459	277.679	161.2	190.719	365.259	230.393	372.371	125.198	168.71	183.126	303.378	186.411	257.983	477.783	447.284	315.697	36.9884	42.5185	40.0094	48.0632	36.4298	64.6957	60.3715	31.986
pgaptmp_001535	pgaptmp_001535	pgaptmp_001535	protein_coding	protein_coding	pgaptmp_001535	0.4094	381				TRUE	0.614644	0.00301116	0.0195558	Chromosome_I	1592583	1592963	381	+	7.32879	282.929	286.038	335.717	238.947	206.867	190.498	223.48	205.232	286.43	133.188	74.379	62.9881	119.306	92.1247	61.9203	254.501	154.455	100.547	137.467	146.546	162.002	30.5992	31.027	36.7782	33.7863	28.0744	24.4737	27.9284	23.4076
pgaptmp_004643	pgaptmp_004643	pgaptmp_004643	protein_coding	protein_coding	pgaptmp_004643	0.3338	2037				TRUE	0.755332	0.00302268	0.0196064	Chromosome_II	1552797	1554833	2037	-	11.1995	4896.9	7077.02	6888.33	7411.2	7770.83	8598.82	8229.4	7182.37	8046.79	445.979	511.582	372.371	606.84	507.241	376.792	1289.36	1014.61	990.919	5469.08	4300.81	3660.42	99.0578	143.582	141.145	196.003	197.251	206.624	192.358	153.22
pgaptmp_004853	pgaptmp_004853	pgaptmp_004853	protein_coding	protein_coding	pgaptmp_004853	0.4736	870				TRUE	-1.04336	0.00302936	0.0196125	Chromosome_II	1776450	1777319	870	+	9.04309	417.069	317.722	345.519	772.574	871.163	447.795	356.38	579.127	561.6	819.309	952.414	724.363	428.618	437.315	403.141	244.388	287.605	310.902	761.099	930.887	1329.25	19.7536	15.0928	16.5766	47.8393	51.7755	25.1937	19.5041	28.9262
pgaptmp_003520	pgaptmp_003520	pgaptmp_003520	protein_coding	protein_coding	pgaptmp_003520	0.4393	387				TRUE	-0.803545	0.00303106	0.0196125	Chromosome_II	272617	273003	387	-	7.63917	77.8632	88.8918	81.6831	209.479	200.04	370.276	158.886	135.826	141.456	308.755	266.676	257.51	187.06	175.37	206.84	385.965	366.164	216.97	321.875	198.156	230.957	8.29048	9.49276	8.80972	29.1604	26.7269	46.8325	19.5482	15.2514
pgaptmp_002072	pgaptmp_002072	cysB	protein_coding	protein_coding	pgaptmp_002072	0.4738	975	GO:0006355	GO:0003700		TRUE	0.561794	0.00305106	0.0197177	Chromosome_I	2238980	2239954	975	-	12.5739	9388.3	10074.7	10500.4	8899.97	8653.6	7225.75	10883.7	12333.3	11769	3317.6	3236.39	3536.6	4502.7	4498.57	4503.06	2754	2575.13	3200.31	7028.16	8265.84	7681.41	396.771	427.04	449.511	491.755	458.919	362.753	531.501	549.684
pgaptmp_000104	pgaptmp_000104	glpE	protein_coding	protein_coding	pgaptmp_000104	0.4611	321		GO:0004792		TRUE	-0.505434	0.00305722	0.0197333	Chromosome_I	109326	109646	321	+	11.1141	2038.32	1944.18	2570.57	1969.87	1824.25	2007.24	2153.13	1915	2043.01	1915.09	2262.21	2045.26	2137.2	2136.63	2154.04	2469.16	2749.56	2239.82	2540.35	3061.54	2818.84	261.653	250.307	334.245	330.596	293.849	306.075	319.372	259.24
pgaptmp_004597	pgaptmp_004597	pgaptmp_004597	protein_coding	protein_coding	pgaptmp_004597	0.4451	1539				TRUE	0.516066	0.003069	0.0197647	Chromosome_II	1489735	1491273	1539	+	8.69191	313.766	342.365	398.613	396.537	384.377	380.997	524.917	444.794	484.89	478.267	448.088	427.949	388.849	446.194	436.077	611.813	512.63	398.22	358.756	305.836	314.035	8.40088	9.19376	10.8107	13.8806	12.914	12.1176	16.24	12.5591
pgaptmp_000246	pgaptmp_000246	pgaptmp_000246	protein_coding	protein_coding		0.5	1000				TRUE	-0.972208	0.00306959	0.0197647	pgaptmp_000246	1	1000	1000	+	11.5341	1279.73	1730.31	1897.5	1784.09	1966.26	3279.71	1507.93	1311.25	1067.6	7432.31	6178.9	8699.77	4713.32	3603.96	3982.66	6965.91	5547.05	5510.25	3194.16	2357.48	1840.18	52.7324	71.5098	79.1995	96.113	101.668	160.534	71.7983	56.9799
pgaptmp_002534	pgaptmp_002534	pgaptmp_002534	protein_coding	protein_coding		0.5	1000				TRUE	-1.03956	0.00307742	0.019791	pgaptmp_002534	1	1000	1000	+	14.3513	7540.4	7950.1	11199.6	13069.7	18779.2	27125	8940.67	8057.78	6491.48	64075.6	69045.5	68406.9	38646.3	22678.2	26948.5	59929	43919.7	38780.8	20136.2	15412.2	11159.1	310.708	328.559	467.458	704.092	971.002	1327.71	425.699	350.149
pgaptmp_004361	pgaptmp_004361	pgaptmp_004361	protein_coding	protein_coding	pgaptmp_004361	0.4615	156				TRUE	-0.834169	0.00308688	0.0198276	Chromosome_II	1225561	1225716	156	-	7.23618	69.383	89.7719	67.797	162.715	121.526	164.934	116.566	66.4205	101.341	314.809	279.375	300.12	153.183	154.281	143.602	274.726	199.726	186.541	148.085	179.678	180.28	18.3268	23.7825	18.1396	56.1909	40.2799	51.7509	35.5778	18.5018
pgaptmp_001419	pgaptmp_001419	pgaptmp_001419	protein_coding	protein_coding	pgaptmp_001419	0.4933	669				TRUE	-0.659794	0.00310426	0.0199149	Chromosome_I	1469112	1469780	669	-	12.2697	2950.32	3506.39	4090.69	4117.19	3548.14	5299.32	3731.59	2869.52	2869.23	4770.56	5364.36	5381.78	5031.47	5616.28	6152.51	11740.7	10869.1	10594.5	5364.58	4584.98	4553.51	181.719	216.608	255.218	331.542	274.233	387.728	265.583	186.389
pgaptmp_001237	pgaptmp_001237	pgaptmp_001237	protein_coding	protein_coding	pgaptmp_001237	0.4506	1356				TRUE	0.530391	0.00312022	0.0199929	Chromosome_I	1319771	1321126	1356	+	6.82636	156.497	171.623	164.183	146.699	124.939	131.122	174.477	150.006	183.681	64.5761	67.1225	75.9562	108.996	95.4545	101.444	65.732	103.857	70.1184	99.4682	118.511	117.14	4.7556	5.23066	5.0537	5.82818	4.76413	4.73314	6.1265	4.80713
pgaptmp_004530	pgaptmp_004530	pgaptmp_004530	protein_coding	protein_coding	pgaptmp_004530	0.4646	1683		GO:0016791		TRUE	0.663459	0.00314421	0.0201222	Chromosome_II	1409251	1410933	1683	-	6.39084	77.8632	90.652	78.4158	85.8415	106.506	116.278	126.96	97.765	130.196	80.7201	72.5649	46.3148	85.429	94.3446	80.3647	84.2718	79.8904	51.5966	77.1158	59.2556	73.1088	1.90637	2.22605	1.94473	2.74775	3.27215	3.38179	3.59183	2.52428
pgaptmp_000492	pgaptmp_000492	pgaptmp_000492	protein_coding	protein_coding	pgaptmp_000492	0.4811	318				TRUE	0.686805	0.00315809	0.0201674	Chromosome_I	512944	513261	318	+	6.60846	411.673	357.327	460.693	17.937	21.8473	23.9154	40.8352	32.0908	30.9654	258.304	313.843	264.921	228.302	208.668	184.444	219.107	259.644	240.784	18.4407	21.0262	14.9541	53.3437	46.4388	60.4679	3.0387	3.55235	3.68115	6.1142	4.38522
pgaptmp_001890	pgaptmp_001890	pgaptmp_001890	protein_coding	protein_coding	pgaptmp_001890	0.4818	633				TRUE	0.608599	0.00315914	0.0201674	Chromosome_I	2030848	2031480	633	-	8.70021	623.676	606.401	814.38	591.282	544.135	676.228	948.86	925.409	794.544	189.692	263.048	190.817	232.72	168.71	196.301	185.398	276.953	305.61	489.518	662.006	539.177	40.5989	39.5911	53.6988	50.3217	44.4475	52.2904	71.3726	63.5284
pgaptmp_002603	pgaptmp_002603	nusB	protein_coding	protein_coding	pgaptmp_002603	0.4615	468	GO:0006353			TRUE	-0.897187	0.00316277	0.0201674	Chromosome_I	2812194	2812661	468	-	13.3236	8627.4	9606.48	11365.4	9451.54	8269.9	12205.1	7986.61	7002.51	6674.46	15129	13582.3	17090.2	11057.2	12234.8	13016.4	7732.78	7879.85	6468.09	16609	12493.4	9924.52	759.613	848.32	1013.63	1087.98	913.689	1276.52	812.549	650.198
pgaptmp_003285	pgaptmp_003285	pgaptmp_003285	protein_coding	protein_coding	pgaptmp_003285	0.4669	1026		GO:0016747		TRUE	0.545379	0.0031736	0.020212	Chromosome_II	21347	22372	1026	+	8.79118	536.562	720.816	645.296	770.011	759.195	698.494	1012.71	851.526	964.854	310.773	243.092	220.458	217.991	178.7	196.301	266.299	229.019	224.908	644.308	676.024	549.977	21.5492	29.0348	26.2514	40.431	38.2604	33.3233	46.9971	36.0652
pgaptmp_005215	pgaptmp_005215	pgaptmp_005215	protein_coding	protein_coding	pgaptmp_005215	0.2989	465				TRUE	-1.08665	0.00318537	0.0202507	Chromosome_II	2187388	2187852	465	+	6.32504	23.1277	33.4444	32.6732	74.9512	69.6384	106.382	48.2597	26.1204	44.3368	121.08	132.431	124.124	116.36	81.0254	92.2218	259.557	225.024	137.591	107.292	96.8479	61.4778	2.04945	2.97244	2.93278	8.6834	7.74354	11.1982	4.94157	2.44098
pgaptmp_003226	pgaptmp_003226	pgaptmp_003226	protein_coding	protein_coding	pgaptmp_003226	0.4944	807				TRUE	0.554764	0.00318806	0.0202507	Chromosome_I	3493751	3494557	807	-	11.3974	5119.7	5975.99	5997.99	4235.06	4289.59	3915.53	7685.18	6848.78	6418.29	799.129	743.79	816.993	1512.68	1408.51	1495.31	1016.32	1259.6	1307.11	4175.99	4853.86	4801.09	261.414	306.04	310.222	282.716	274.844	237.492	453.433	368.788
pgaptmp_003554	pgaptmp_003554	pgaptmp_003554	protein_coding	protein_coding	pgaptmp_003554	0.4488	909	GO:0055085	GO:0022857	GO:0016020	TRUE	0.596798	0.00319175	0.0202507	Chromosome_II	310977	311885	909	+	7.50582	125.66	111.775	143.762	197.307	193.895	205.342	257.633	259.712	260.391	106.954	116.104	122.271	216.518	172.04	221.332	225.848	254.318	293.704	132.997	193.059	166.156	5.6963	5.08185	6.60118	11.6935	11.0293	11.0573	13.4949	12.4155
pgaptmp_002902	pgaptmp_002902	pgaptmp_002902	protein_coding	protein_coding	pgaptmp_002902	0.4344	762		GO:0003700		TRUE	-1.06938	0.00319731	0.0202507	Chromosome_I	3155681	3156442	762	-	12.2509	5506.7	4851.2	3836.65	3469.54	3493.53	2985.3	1882.87	3088.18	2856.56	6344.6	8308.68	7786.44	4012.22	3807.08	3607.19	11206.5	8982.34	14267.1	5005.26	3955.47	7008.47	297.779	263.109	210.154	245.29	237.057	191.763	117.652	176.11
pgaptmp_004935	pgaptmp_004935	pgaptmp_004935	protein_coding	protein_coding	pgaptmp_004935	0.3476	210				TRUE	-1.41782	0.00319976	0.0202507	Chromosome_II	1866338	1866547	210	+	9.50567	588.985	712.895	724.529	2666.85	1791.48	1477.81	590.996	675.4	871.958	528.717	277.561	374.223	503.736	681.501	508.537	391.021	300.92	281.797	2434.74	2152.95	956.229	115.569	140.297	144.005	684.139	441.1	344.454	133.998	139.759
pgaptmp_002525	pgaptmp_002525	lolB	protein_coding	protein_coding	pgaptmp_002525	0.4397	639	GO:0015031		GO:0009279	TRUE	-0.594884	0.00320273	0.0202507	Chromosome_I	2745461	2746099	639	+	10.8312	2059.13	2459.93	2345.12	2453.53	2192.93	1981.68	1949.69	1717.98	1925.49	1390.4	1104.8	1213.45	1123.83	1663.79	1467.64	1717.46	1407.4	1451.32	3161.75	2438.4	2587.05	132.783	159.097	153.181	206.85	177.446	151.798	145.277	116.83
pgaptmp_001662	pgaptmp_001662	pgaptmp_001662	protein_coding	protein_coding	pgaptmp_001662	0.4645	1029		GO:0042626,GO:0140359	GO:0055052	TRUE	0.630259	0.00321573	0.0203084	Chromosome_I	1748103	1749131	1029	-	6.41943	148.788	183.064	177.252	115.31	102.409	97.3109	111.369	136.573	128.788	58.5221	59.866	59.2829	58.9165	55.4968	96.1741	42.1359	62.5808	35.7207	70.4101	66.9015	92.2167	5.95814	7.35241	7.18981	6.0369	5.14598	4.62891	5.15324	5.76747
pgaptmp_001399	pgaptmp_001399	pgaptmp_001399	protein_coding	protein_coding	pgaptmp_001399	0.3869	411				TRUE	0.724967	0.00323253	0.0203901	Chromosome_I	1456137	1456547	411	+	6.9884	123.348	176.023	175.619	182.573	174.779	249.875	230.904	155.976	189.311	96.8642	79.8213	72.251	123.725	82.1353	81.6821	119.666	97.1999	87.3173	117.909	117.874	93.0475	12.3665	17.6999	17.8349	23.931	21.9882	29.7586	26.7499	16.4913
pgaptmp_001957	pgaptmp_001957	rsuA	protein_coding	protein_coding	pgaptmp_001957	0.4672	702				TRUE	-0.465146	0.00324211	0.0204261	Chromosome_I	2116949	2117650	702	-	10.2161	1162.55	1149.43	1255.47	750.793	850.681	834.565	800.369	747.044	761.468	1719.34	1705.27	2047.11	2023.78	1764.8	1790.42	1267.45	1431.37	1211.86	939.36	1016.27	1144.82	68.2391	67.6687	74.6466	57.6166	62.6576	58.191	54.2858	46.2431
pgaptmp_004266	pgaptmp_004266	hxsC	protein_coding	protein_coding	pgaptmp_004266	0.4361	1158				TRUE	0.475417	0.00326775	0.0205558	Chromosome_II	1114087	1115244	1158	+	9.3203	982.156	1030.62	994.083	1105.69	1183.85	824.669	1060.23	1221.69	1221.02	421.763	475.3	394.602	362.337	589.376	386.014	235.961	248.992	227.554	799.657	762.677	874.813	34.9486	36.7816	35.8307	51.4386	52.8607	34.8581	43.5937	45.8448
pgaptmp_004127	pgaptmp_004127	pgaptmp_004127	protein_coding	protein_coding	pgaptmp_004127	0.4753	1233	GO:0055085	GO:0022857		TRUE	-0.531437	0.00327344	0.0205558	Chromosome_II	941095	942327	1233	-	10.1492	622.135	656.567	575.866	1379.23	1648.11	2008.89	1112.2	981.382	995.82	1993.79	1975.58	2202.73	1172.44	1279.76	1501.9	588.217	605.835	583.438	1616.08	1361.61	1355	20.7912	22.0068	19.4939	60.2612	69.1141	79.7492	42.949	34.587
pgaptmp_000473	pgaptmp_000473	pgaptmp_000473	protein_coding	protein_coding		0.5	1000				TRUE	-1.44548	0.00327441	0.0205558	pgaptmp_000473	1	1000	1000	+	13.7017	4304.06	5134.6	6571.4	9955.7	9204.56	16705.3	5667.92	5462.15	4468.17	45013.6	39576.9	43156.1	18267.1	15548	16920.1	36027.9	23727.4	21293.5	19888.1	13934	7211.18	177.352	212.201	274.283	536.335	475.934	817.687	269.871	237.357
pgaptmp_003912	pgaptmp_003912	pgaptmp_003912	protein_coding	protein_coding	pgaptmp_003912	0.4671	486		GO:0047617		TRUE	0.64163	0.00329268	0.0206459	Chromosome_II	683125	683610	486	-	8.71426	412.444	520.149	512.97	748.231	582.368	837.039	1478.97	1095.57	1123.9	143.278	166.899	194.522	154.656	156.501	177.856	256.186	234.345	296.35	671.69	774.783	847.397	34.9693	44.2317	44.0551	82.9399	61.9591	84.3028	144.896	97.9579
pgaptmp_004281	pgaptmp_004281	fruA	protein_coding	protein_coding	pgaptmp_004281	0.4787	1734	GO:0009401	GO:0008982,GO:0022877		TRUE	1.13928	0.0033053	0.0207004	Chromosome_II	1132488	1134221	1734	-	11.5821	3775.98	2398.32	2069.85	3017.27	3362.44	1708.71	2959.43	5616.64	4754.6	2254.11	2817.33	2478.77	1796.95	2193.23	2522.92	4538.88	4208.89	30673.5	1492.58	1820.36	2557.98	89.7302	57.1609	49.8231	93.7408	100.265	48.234	81.2629	140.755
pgaptmp_004753	pgaptmp_004753	pgaptmp_004753	protein_coding	protein_coding	pgaptmp_004753	0.4783	1242	GO:0030001	GO:0046872,GO:0046873		TRUE	-0.627478	0.00331504	0.0207367	Chromosome_II	1673018	1674259	1242	-	7.63651	117.18	105.614	111.089	231.9	274.457	232.557	143.294	147.021	143.567	260.322	244.906	305.678	169.385	239.746	262.173	205.623	248.992	251.368	239.73	244.031	175.295	3.88768	3.51432	3.73328	10.0587	11.4261	9.16515	5.49338	5.14392
pgaptmp_005299	pgaptmp_005299	pgaptmp_005299	protein_coding	protein_coding	pgaptmp_005299	0.4717	441		GO:0003677		TRUE	0.57922	0.00332056	0.0207466	Chromosome_II	2285138	2285578	441	-	9.45639	665.306	790.345	923.836	976.928	837.026	1090.21	1652.71	1354.53	1299.14	379.385	370.081	479.821	561.18	486.152	499.315	360.683	388.8	452.462	937.125	1005.43	843.243	62.1643	74.0661	87.4374	119.341	98.1396	121.005	178.439	133.471
pgaptmp_003008	pgaptmp_003008	glpX	protein_coding	protein_coding	pgaptmp_003008	0.4911	1008	GO:0006071,GO:0006094	GO:0042132		TRUE	-0.439964	0.00334456	0.0208718	Chromosome_I	3255306	3256313	1008	+	11.1295	1550.33	1718.87	1704.73	1916.7	1906.86	1815.1	1486.4	1529.16	1479.3	2476.09	3238.21	3293.91	3247.77	2623.89	3103.92	3392.78	3728.22	3286.3	1851.34	2092.42	1975.6	63.3754	70.4732	70.5887	102.437	97.8144	88.1397	70.2114	65.9221
pgaptmp_001731	pgaptmp_001731	pgaptmp_001731	protein_coding	protein_coding	pgaptmp_001731	0.4689	2043				TRUE	0.414151	0.00337713	0.0210365	Chromosome_I	1829799	1831841	2043	-	8.43612	513.435	466.462	447.623	319.664	339.999	277.089	334.106	322.401	351.176	532.753	553.307	511.315	377.066	359.619	358.347	220.792	251.655	283.12	232.465	250.403	245.081	10.3556	9.43603	9.14503	8.42925	8.60505	6.6387	7.78661	6.85749
pgaptmp_004425	pgaptmp_004425	nirD	protein_coding	protein_coding	pgaptmp_004425	0.4969	324				TRUE	1.076	0.00337894	0.0210365	Chromosome_II	1295160	1295483	324	-	7.6191	627.531	462.941	524.405	820.62	749.637	620.151	679.348	1097.06	938.111	54.4861	59.866	88.9244	29.4583	43.2875	36.8887	21.9107	38.6137	38.3667	296.728	375.286	570.747	79.8084	59.0504	67.5559	136.446	119.633	93.6882	99.8344	147.137
pgaptmp_005037	pgaptmp_005037	pgaptmp_005037	protein_coding	protein_coding	pgaptmp_005037	0.4411	501		GO:0016747		TRUE	0.542045	0.00342847	0.0213197	Chromosome_II	1996312	1996812	501	+	8.53641	249.779	340.605	294.876	484.3	426.706	473.36	637.771	508.229	486.298	330.953	290.259	274.183	368.228	519.45	443.982	274.726	343.529	227.554	352.609	359.994	368.036	20.5436	28.0967	24.5665	52.0764	44.0387	46.2473	60.6121	44.0818
pgaptmp_004521	pgaptmp_004521	pgaptmp_004521	protein_coding	protein_coding	pgaptmp_004521	0.4449	1524		GO:0016853		TRUE	0.537883	0.00343936	0.0213622	Chromosome_II	1396914	1398437	1524	+	7.49249	221.255	198.906	201.757	254.962	258.754	216.888	298.468	258.219	279.393	123.098	134.245	122.271	114.887	110.994	122.523	180.342	125.162	171.989	172.114	211.536	167.818	5.98227	5.39393	5.52567	9.0127	8.77903	6.96599	9.32492	7.36276
pgaptmp_002406	pgaptmp_002406	rnd	protein_coding	protein_coding	pgaptmp_002406	0.4835	1119	GO:0006396	GO:0008408,GO:0033890		TRUE	-0.526646	0.00345844	0.0214101	Chromosome_I	2616541	2617659	1119	-	10.5834	1374.56	1245.37	1030.84	1071.1	1198.19	959.09	733.548	895.557	927.555	2574.97	2398.27	2754.8	2819.16	2723.78	2737.67	1971.96	2284.86	2192.19	1120.97	1159.63	1300.17	50.6163	45.9948	38.4505	51.566	55.3655	41.9529	31.2127	34.7777
pgaptmp_005057	pgaptmp_005057	nqrM	protein_coding	protein_coding	pgaptmp_005057	0.4541	207				TRUE	0.452893	0.00345912	0.0214101	Chromosome_II	2022048	2022254	207	-	8.92685	440.197	495.506	494.999	891.727	720.28	606.131	791.459	806.002	902.923	429.835	400.921	403.865	222.41	271.934	299.062	348.885	383.474	312.225	543.163	622.503	599.824	87.6264	98.9282	99.8103	232.074	179.918	143.327	182.05	169.201
pgaptmp_002545	pgaptmp_002545	pgaptmp_002545	protein_coding	protein_coding		0.5	1000				TRUE	-0.951142	0.00345928	0.0214101	pgaptmp_002545	1	1000	1000	+	14.1896	6805.71	7879.69	10566.5	11642.4	14617.2	19377.2	8887.96	7689.85	6473.18	52678	64479.3	55890.8	27259.2	22114.4	25687.7	53851.4	40669.5	34002.1	17584.6	15091.1	10449.6	280.434	325.65	441.035	627.202	755.804	948.472	423.189	334.161
pgaptmp_000534	pgaptmp_000534	serA	protein_coding	protein_coding	pgaptmp_000534	0.4667	1230		GO:0016616,GO:0051287		TRUE	0.518071	0.00347598	0.0214825	Chromosome_I	543160	544389	1230	-	11.1201	2490.85	2703.72	2585.27	2402.92	2588.91	1863.75	2406.3	2967.28	2810.11	1789.97	1670.81	1771.08	2876.6	2767.07	2843.07	1848.92	2106.44	1661.67	1728.4	1966.27	1839.35	83.4451	90.8444	87.7287	105.244	108.832	74.1678	93.149	104.831
pgaptmp_002706	pgaptmp_002706	pgaptmp_002706	protein_coding	protein_coding	pgaptmp_002706	0.4452	447				TRUE	0.798521	0.00347913	0.0214825	Chromosome_I	2929160	2929606	447	+	9.47361	3932.48	4647.9	4774.38	2458.02	1957.39	2786.56	5314.51	3688.95	3809.45	68.6121	70.7507	100.04	95.7394	89.9048	111.984	109.553	114.51	104.516	2699.05	2438.4	1983.91	362.507	429.725	445.81	296.238	226.419	305.136	566.094	358.619
pgaptmp_000435	pgaptmp_000435	pgaptmp_000435	protein_coding	protein_coding	pgaptmp_000435	0.4486	399				TRUE	0.698281	0.00350234	0.0215949	Chromosome_I	468503	468901	399	-	7.7293	588.214	859.874	651.014	144.137	113.333	131.947	256.89	178.365	209.017	167.494	156.014	164.881	166.439	155.391	164.682	321.918	291.6	287.089	144.173	120.423	111.325	60.7464	89.0643	68.1018	19.4611	14.6868	16.1867	30.6554	19.4256
pgaptmp_004433	pgaptmp_004433	pgaptmp_004433	protein_coding	protein_coding	pgaptmp_004433	0.4747	1047				TRUE	0.552967	0.00351171	0.0215949	Chromosome_II	1301808	1302854	1047	+	7.6488	278.303	230.591	261.386	218.448	179.558	197.096	331.878	326.132	337.101	96.8642	132.431	114.861	139.927	153.171	140.968	197.196	153.123	318.84	206.76	254.863	188.587	10.9529	9.10199	10.4202	11.24	8.86751	9.21432	15.0926	13.5358
pgaptmp_002417	pgaptmp_002417	pgaptmp_002417	protein_coding	protein_coding	pgaptmp_002417	0.41	522				TRUE	-0.54264	0.003513	0.0215949	Chromosome_I	2628390	2628911	522	+	8.54383	575.879	661.848	657.549	588.079	522.971	398.315	397.957	399.269	396.217	244.178	263.048	296.415	206.208	236.416	235.824	289.895	244.997	182.572	616.926	597.654	476.869	45.4589	52.3998	52.5773	60.6917	51.8025	37.3498	36.2993	33.2378
pgaptmp_003547	pgaptmp_003547	pgaptmp_003547	protein_coding	protein_coding	pgaptmp_003547	0.464	1278				TRUE	0.868853	0.00351374	0.0215949	Chromosome_II	302422	303699	1278	+	9.96919	2254.18	1468.03	951.608	2329.25	2033.85	1494.3	2622.36	3422.52	3273.19	268.394	602.288	437.211	407.997	301.903	288.522	446.64	444.723	754.104	1165.12	1727.97	2057.01	72.6801	47.4731	31.0791	98.1861	82.2872	57.2321	97.6999	116.373
pgaptmp_002744	pgaptmp_002744	pheA	protein_coding	protein_coding	pgaptmp_002744	0.4411	1179	GO:0009094	GO:0004664		TRUE	-0.468937	0.00352124	0.021601	Chromosome_I	2970734	2971912	1179	+	10.7772	2029.07	2020.75	1966.93	2059.56	1814.01	1313.7	1360.18	1398.56	1529.27	1440.85	1509.35	1465.4	1713	2333.09	1912.94	2020.84	1910.71	1746.35	1935.72	1766.2	2058.68	70.9155	70.8337	69.6331	94.1075	79.5555	54.5399	54.9308	51.5472
pgaptmp_000339	pgaptmp_000339	pgaptmp_000339	protein_coding	protein_coding	pgaptmp_000339	0.4354	666				TRUE	-0.687202	0.00352673	0.021601	Chromosome_I	356927	357592	666	+	12.2782	3642.61	5079.15	4459.9	4736.02	4143.48	5617.64	5099.94	3662.08	3926.27	5141.87	3903.99	4692.61	5071.24	6143.5	5852.13	4798.43	5312.71	4963.85	7076.21	6785.09	5937.6	225.37	315.18	279.506	383.092	321.688	412.869	364.606	238.941
pgaptmp_000051	pgaptmp_000051	pgaptmp_000051	protein_coding	protein_coding	pgaptmp_000051	0.4739	306				TRUE	-0.449949	0.00353011	0.021601	Chromosome_I	56702	57007	306	+	7.87601	199.669	150.5	185.421	117.872	152.931	145.142	113.596	111.198	128.084	353.151	342.869	418.686	452.185	402.907	436.077	529.227	544.586	511.997	157.584	159.926	157.018	26.8873	20.3262	25.2917	20.7517	25.8416	23.2169	17.6756	15.7912
pgaptmp_004903	pgaptmp_004903	pgaptmp_004903	protein_coding	protein_coding	pgaptmp_004903	0.4771	2157	GO:0006508	GO:0008236		TRUE	0.446017	0.00353476	0.021601	Chromosome_II	1838140	1840296	2157	-	9.14935	422.466	462.941	437.821	396.537	363.895	472.535	569.465	530.618	527.82	700.247	711.136	709.542	815.994	793.604	777.298	962.384	840.18	877.142	354.286	377.834	422.037	8.07048	8.86988	8.47203	9.9037	8.72307	10.723	12.5704	10.6898
pgaptmp_002567	pgaptmp_002567	ybeD	protein_coding	protein_coding	pgaptmp_002567	0.448	279				TRUE	-0.723057	0.00353707	0.021601	Chromosome_I	2770956	2771234	279	+	10.9206	1302.86	1464.51	1859.92	1321.58	899.155	1684.8	1360.18	1051.53	1090.83	3571.87	2323.89	2827.05	1961.92	2772.62	2684.97	4260.78	3476.56	3015.09	2230.21	1809.53	1566.85	192.421	216.936	278.248	255.183	166.638	295.581	232.127	163.778
pgaptmp_001345	pgaptmp_001345	pgaptmp_001345	protein_coding	protein_coding	pgaptmp_001345	0.3721	387				TRUE	0.53193	0.00353932	0.021601	Chromosome_I	1417430	1417816	387	+	9.12688	464.866	535.111	590.569	573.985	576.906	737.254	715.729	561.962	598.899	577.149	560.564	526.136	634.826	569.397	440.03	871.37	720.345	451.139	434.754	384.843	432.006	49.4966	57.1445	63.6943	79.9013	77.0794	93.2478	88.0583	63.1006
pgaptmp_001783	pgaptmp_001783	queC	protein_coding	protein_coding	pgaptmp_001783	0.4306	699				TRUE	-0.536774	0.00354605	0.0216095	Chromosome_I	1902537	1903235	699	-	11.1438	2040.63	2232.86	2362.27	1789.86	1788.75	2173.83	1635.63	1543.34	1499.71	2736.41	3372.45	3682.95	2067.97	2080.02	2391.18	3477.05	3101.08	2489.87	2489.5	1993.67	2098.55	120.295	132.016	141.057	137.945	132.317	152.223	111.414	95.9451
pgaptmp_004420	pgaptmp_004420	pgaptmp_004420	protein_coding	protein_coding	pgaptmp_004420	0.4752	1332				TRUE	0.450321	0.00354894	0.0216095	Chromosome_II	1290564	1291895	1332	+	8.09632	498.016	526.31	279.356	422.161	386.425	305.127	435.08	394.045	390.587	213.908	190.483	187.112	216.518	224.207	159.412	156.746	185.079	142.883	295.052	265.695	299.081	15.4063	16.3297	8.75377	17.0741	15.0005	11.2127	15.5524	12.8552
pgaptmp_000151	pgaptmp_000151	pgaptmp_000151	protein_coding	protein_coding	pgaptmp_000151	0.439	492				TRUE	0.62626	0.00356301	0.0216702	Chromosome_I	158483	158974	492	-	11.8123	6473.44	9403.17	8651.06	7413.12	7587.17	9155.47	12136.2	9419.77	9858.26	958.552	905.247	876.276	1661.45	1560.57	1486.09	1193.29	1236.97	1251.55	7026.48	6531.5	6148.61	542.161	789.861	733.914	811.709	797.368	910.853	1174.49	831.98
pgaptmp_000583	pgaptmp_000583	pgaptmp_000583	protein_coding	protein_coding		0.5	1000				TRUE	-1.26417	0.00357064	0.0216915	pgaptmp_000583	1	1000	1000	+	12.9637	2338.21	2521.53	3045.96	3759.09	5735.61	9792.12	2651.32	2532.93	1788.25	29529.4	36376.8	39010	21064.1	11954	14810.8	25765.3	19039.2	19069.6	7745.11	5011.24	3447.74	96.3477	104.209	127.135	202.51	296.567	479.302	126.239	110.068
pgaptmp_001170	pgaptmp_001170	pgaptmp_001170	protein_coding	protein_coding	pgaptmp_001170	0.4279	201				TRUE	1.0049	0.003575	0.021693	Chromosome_I	1247885	1248085	201	+	8.43883	540.417	601.12	697.574	438.176	505.22	822.195	836.007	644.801	537.672	226.016	239.464	285.299	142.873	128.753	168.634	286.524	214.372	194.479	376.079	364.454	220.988	110.788	123.597	144.855	117.44	129.966	200.222	198.037	139.401
pgaptmp_001112	pgaptmp_001112	pgaptmp_001112	protein_coding	protein_coding	pgaptmp_001112	0.4535	333				TRUE	0.506345	0.00358397	0.0217224	Chromosome_I	1184583	1184915	333	-	8.10233	1751.54	1749.67	1758.64	1131.96	933.974	987.953	1775.96	1563.49	1601.76	38.3421	39.9107	35.1992	30.9312	32.1882	44.7934	33.7087	17.3096	25.1368	1022.62	1073.61	1273.59	216.737	217.147	220.431	183.126	145.022	145.219	253.934	204.028
pgaptmp_003037	pgaptmp_003037	rfaD	protein_coding	protein_coding	pgaptmp_003037	0.4374	942	GO:0005975	GO:0008712		TRUE	-0.518201	0.00362346	0.0219365	Chromosome_I	3289565	3290506	942	+	12.6261	7269.8	7778.47	8022.91	7568.79	6010.07	6006.06	7051.86	6531.6	6865.88	5513.19	5057.77	5439.21	4267.03	5992.55	5650.56	4604.61	4509.81	4351.31	9399.19	8758.36	10246.9	318.002	341.26	355.486	432.852	329.892	312.084	356.439	301.305
pgaptmp_002543	pgaptmp_002543	pgaptmp_002543	protein_coding	protein_coding		0.5	1000				TRUE	-0.990144	0.00363289	0.0219496	pgaptmp_002543	1	1000	1000	+	11.5072	942.068	1035.9	1373.09	1324.14	1336.78	1919.83	996.378	994.069	857.883	11321	11303.8	13120	5326.06	5126.8	6448.94	12910.4	8935.74	7621.74	2481.68	1740.71	1262.79	38.8186	42.8113	57.3114	71.3341	69.1202	93.9713	47.4413	43.197
pgaptmp_000857	pgaptmp_000857	upp	protein_coding	protein_coding	pgaptmp_000857	0.4418	627	GO:0006223	GO:0004845		TRUE	-0.794339	0.00363534	0.0219496	Chromosome_I	906484	907110	627	+	12.2535	3252.52	4294.09	4315.32	5012.12	3789.83	7050.09	4303.28	3132.21	3645.47	6734.08	6236.95	7688.25	4881.24	5678.43	5803.38	3938.86	4244.84	3652.77	7654.02	5550.91	5399.25	213.752	283.038	287.267	430.644	312.533	550.377	326.787	217.081
pgaptmp_000005	pgaptmp_000005	pgaptmp_000005	protein_coding	protein_coding	pgaptmp_000005	0.4269	438				TRUE	-0.790547	0.00363812	0.0219496	Chromosome_I	6670	7107	438	+	12.0405	2485.45	3015.28	3224.03	2197.93	2446.9	2842.63	1980.13	1477.67	1666.5	9411.97	7319.98	8438.55	14885.3	16756.7	17011	4892.82	5381.95	4944.01	3544.53	2696.45	2345.3	233.824	284.508	307.232	270.336	288.859	317.672	215.255	146.602
pgaptmp_001334	pgaptmp_001334	pgaptmp_001334	protein_coding	protein_coding	pgaptmp_001334	0.3988	855				TRUE	0.475035	0.0036544	0.0220021	Chromosome_I	1405356	1406210	855	+	8.46907	375.439	395.172	469.678	519.534	501.123	473.36	467.748	455.242	443.368	433.871	299.33	216.753	248.922	296.353	213.428	466.866	340.866	182.572	348.139	287.358	310.712	18.0939	19.1013	22.9285	32.735	30.3056	27.0993	26.0483	23.1373
pgaptmp_001555	pgaptmp_001555	citG	protein_coding	protein_coding	pgaptmp_001555	0.4844	960	GO:0016310,GO:0019361	GO:0005524,GO:0046917		TRUE	0.657209	0.00365832	0.0220021	Chromosome_I	1612694	1613653	960	+	6.87807	147.246	124.096	132.327	97.3725	138.594	99.7849	127.703	155.976	147.789	121.08	123.36	150.06	167.912	98.7843	129.11	101.126	101.194	87.3173	69.2925	103.219	85.5705	6.32021	5.34232	5.7533	5.46423	7.46479	5.08776	6.33376	7.06032
pgaptmp_001323	pgaptmp_001323	pgaptmp_001323	protein_coding	protein_coding	pgaptmp_001323	0.3865	414				TRUE	0.517865	0.00365936	0.0220021	Chromosome_I	1395742	1396155	414	+	7.2587	177.312	195.386	172.351	226.135	209.598	239.154	184.872	197.769	190.719	171.53	156.014	127.829	116.36	116.543	98.809	153.375	109.183	91.2862	138.585	131.892	110.494	17.648	19.5045	17.3762	29.426	26.1776	28.2755	21.262	20.7585
pgaptmp_002183	pgaptmp_002183	pgaptmp_002183	protein_coding	protein_coding	pgaptmp_002183	0.4414	981				TRUE	-0.530374	0.00366558	0.0220102	Chromosome_I	2363991	2364971	981	-	11.0689	3759.02	3206.27	3294.28	2447.77	2480.36	2291.75	2378.09	2597.86	2606.73	1759.7	2115.27	2004.5	820.413	986.733	931.44	1580.94	1709.65	1570.39	3451.21	3142.46	4037.6	157.893	135.074	140.163	134.42	130.734	114.349	115.423	115.076
pgaptmp_000280	pgaptmp_000280	kefG	protein_coding	protein_coding	pgaptmp_000280	0.4728	588	GO:0006813			TRUE	0.463207	0.00366907	0.0220102	Chromosome_I	295922	296509	588	+	10.1473	1095.48	1256.81	1339.6	943.616	1058.91	1131.45	1638.6	1492.6	1508.16	661.905	660.34	605.797	1305	1208.72	1202.84	1188.23	1454	1623.31	1006.42	1183.2	1067.55	76.769	88.335	95.091	86.4535	93.1166	94.1866	132.687	110.307
pgaptmp_004943	pgaptmp_004943	pgaptmp_004943	protein_coding	protein_coding	pgaptmp_004943	0.4539	705				TRUE	-0.56129	0.00367617	0.0220277	Chromosome_II	1873417	1874121	705	-	7.54492	116.409	123.216	153.564	212.041	230.08	235.855	171.508	153.737	150.605	199.782	181.412	192.669	201.789	221.987	180.491	190.454	206.383	166.697	261.523	226.191	201.049	6.80388	7.22305	9.09163	16.203	16.8746	16.3753	11.5832	9.47606
pgaptmp_003139	pgaptmp_003139	pgaptmp_003139	protein_coding	protein_coding	pgaptmp_003139	0.4595	618		GO:0009055,GO:0020037		TRUE	-0.707657	0.00370314	0.0221382	Chromosome_I	3400134	3400751	618	-	10.8487	956.715	1109.83	1255.47	2030.73	1904.13	2991.07	1450.76	1135.12	1245.65	2579.01	2472.65	2336.12	1923.63	1982.35	1935.34	2329.27	2162.37	2693.61	2409.03	1989.21	1667.38	63.79	74.2179	84.7927	177.022	159.313	236.903	111.774	79.8161
pgaptmp_003287	pgaptmp_003287	pgaptmp_003287	protein_coding	protein_coding	pgaptmp_003287	0.4621	396		GO:0046872		TRUE	0.505775	0.00370635	0.0221382	Chromosome_II	24250	24645	396	-	7.00177	93.2817	117.056	99.6534	159.512	133.815	215.239	209.373	214.187	194.238	106.954	92.5202	77.8088	106.05	79.9154	68.5076	160.116	119.836	157.436	152.555	137.626	124.617	9.70642	12.2163	10.5036	21.7001	17.4724	26.6047	25.1743	23.5037
pgaptmp_004741	pgaptmp_004741	pgaptmp_004741	protein_coding	protein_coding	pgaptmp_004741	0.4227	537				TRUE	0.711662	0.00370721	0.0221382	Chromosome_II	1658268	1658804	537	-	8.98454	734.689	942.605	1015.32	987.818	867.066	1474.51	1604.45	1213.48	1224.54	207.854	253.977	183.407	187.06	140.962	146.237	266.299	300.92	191.833	915.331	802.818	662.133	56.3751	72.5433	78.9169	99.0985	83.4876	134.402	142.261	98.1965
pgaptmp_001706	pgaptmp_001706	uspE	protein_coding	protein_coding	pgaptmp_001706	0.443	948				TRUE	0.826161	0.00372518	0.0222178	Chromosome_I	1802536	1803483	948	+	13.3387	30548.6	42109.2	45392.9	25689.7	22591.5	30011.3	43875.5	37438	34856.5	2300.52	2421.85	2426.89	2886.91	2851.43	2774.56	2332.64	2226.28	2473.99	25490.7	20866.3	17027.7	1327.83	1835.74	1998.58	1459.87	1232.2	1549.57	2203.67	1716.1
pgaptmp_001177	pgaptmp_001177	pgaptmp_001177	protein_coding	protein_coding	pgaptmp_001177	0.4444	243				TRUE	0.420183	0.00372898	0.0222178	Chromosome_I	1253948	1254190	243	-	7.6656	454.073	392.532	416.584	406.786	324.296	211.115	288.816	277.623	316.692	131.17	116.104	70.3985	113.414	144.292	96.1741	178.656	135.814	125.684	207.319	212.811	214.342	76.9978	66.7591	71.5545	90.1829	69.0049	42.5252	56.591	49.6462
pgaptmp_005288	pgaptmp_005288	pgaptmp_005288	protein_coding	protein_coding	pgaptmp_005288	0.5067	2601				TRUE	0.562476	0.00373503	0.0222287	Chromosome_II	2273359	2275959	2601	-	8.04489	205.836	326.523	289.158	399.74	344.096	447.795	480.37	445.54	435.627	143.278	152.386	168.586	229.775	167.6	160.729	210.679	233.014	210.355	322.433	316.03	246.742	3.26092	5.18819	4.64019	8.27944	6.84042	8.42698	8.79363	7.44361
pgaptmp_004924	pgaptmp_004924	pgaptmp_004924	protein_coding	protein_coding	pgaptmp_004924	0.4574	129				TRUE	-0.773513	0.00374543	0.0222509	Chromosome_II	1857307	1857435	129	+	5.87736	36.2334	33.4444	57.1782	59.5766	66.9075	76.6942	58.6541	41.0464	49.2632	72.6481	58.0519	53.7251	39.7687	44.3975	54.0156	74.1592	54.5917	71.4414	107.292	79.6447	73.1088	11.5738	10.7146	18.5004	24.88	26.8182	29.1008	21.6492	13.8268
pgaptmp_000748	pgaptmp_000748	glpK	protein_coding	protein_coding	pgaptmp_000748	0.4822	1518	GO:0006072	GO:0004370		TRUE	0.77186	0.00375114	0.0222509	Chromosome_I	784424	785941	1518	-	8.33295	481.056	336.205	311.213	250.478	252.61	179.778	201.948	238.815	294.171	397.547	901.618	437.211	508.155	410.676	380.744	492.147	491.326	742.197	115.115	122.334	172.803	13.0582	9.15321	8.55709	8.88919	8.60444	5.79692	6.33434	6.83641
pgaptmp_001359	pgaptmp_001359	pgaptmp_001359	protein_coding	protein_coding	pgaptmp_001359	0.3435	1371				TRUE	0.475104	0.00375143	0.0222509	Chromosome_I	1428260	1429630	1371	+	11.9754	6151.96	6500.54	6189.94	5214.55	5883.76	4720.4	6268.57	6662.2	6757.5	2603.22	2951.58	2858.55	2565.82	2208.77	2003.85	3124.8	2961.27	2255.7	4761.06	4394.47	4561.82	184.899	195.954	188.447	204.901	221.902	168.529	217.703	211.163
pgaptmp_000134	pgaptmp_000134	pgaptmp_000134	protein_coding	protein_coding	pgaptmp_000134	0.412	432		GO:0008080,GO:0016746		TRUE	-0.414355	0.00376259	0.0222852	Chromosome_I	140502	140933	432	-	9.53074	867.288	861.634	841.336	690.576	632.89	512.119	655.59	650.772	648.163	554.951	651.27	618.765	673.122	804.704	815.504	937.102	894.772	894.341	834.304	795.172	903.059	82.7252	82.4292	81.288	86.1176	75.751	58.0257	72.2572	65.461
pgaptmp_000753	pgaptmp_000753	pgaptmp_000753	protein_coding	protein_coding	pgaptmp_000753	0.5081	984				TRUE	0.751251	0.00376568	0.0222852	Chromosome_I	791954	792937	984	-	7.97887	432.488	351.167	264.653	174.886	227.349	136.895	221.252	308.221	306.135	232.07	304.772	270.478	299.001	359.619	345.173	234.276	276.953	316.194	124.056	161.838	188.587	18.1108	14.7489	11.2259	9.57469	11.9465	6.80966	10.706	13.6115
pgaptmp_002886	pgaptmp_002886	dnaG	protein_coding	protein_coding	pgaptmp_002886	0.4579	1758	GO:0006269	GO:0003896		TRUE	-0.577168	0.00378193	0.0223392	Chromosome_I	3136982	3138739	1758	+	13.3861	10084.4	9617.92	9037.42	9823.73	10713.4	6806.81	6418.54	7860.76	7688.57	14719.3	13556.9	14805.9	14056	16271.7	15381.3	11540.2	11513.5	10504.5	10004.9	10140.4	11650	236.369	226.102	214.569	301.038	315.103	189.521	173.84	194.304
pgaptmp_002070	pgaptmp_002070	ald	protein_coding	protein_coding	pgaptmp_002070	0.4738	1125	GO:0042853	GO:0000286		TRUE	0.519262	0.00378328	0.0223392	Chromosome_I	2236512	2237636	1125	+	13.2872	4492.17	5673.23	6007.79	12456	12247.5	11648.4	14495.7	15444.6	14540.4	8717.78	8205.27	8481.16	11046.9	10788.6	10955.9	11594.1	10938.3	11054.9	9697.03	10497.2	9884.64	164.536	208.411	222.896	596.472	562.909	506.813	613.508	596.572
pgaptmp_002400	pgaptmp_002400	pgaptmp_002400	protein_coding	protein_coding	pgaptmp_002400	0.4963	945		GO:0001216		TRUE	-0.521322	0.00379547	0.0223861	Chromosome_I	2611919	2612863	945	-	8.2649	183.48	163.702	182.153	111.466	148.835	80.8175	95.0345	105.974	108.379	744.643	707.507	805.877	936.773	981.184	1053.96	1215.2	1091.83	1177.46	156.467	127.431	155.356	8.00045	7.15918	8.04537	6.3544	8.14361	4.18607	4.78831	4.87311
pgaptmp_004256	pgaptmp_004256	pgaptmp_004256	protein_coding	protein_coding	pgaptmp_004256	0.4362	894	GO:0006355	GO:0003677,GO:0003700		TRUE	0.434054	0.00380148	0.0223964	Chromosome_II	1105067	1105960	894	-	7.9689	326.1	363.488	318.564	520.815	544.135	418.107	557.585	511.214	487.002	145.296	90.7061	138.944	145.818	156.501	133.063	124.722	90.5424	108.485	349.815	380.383	381.329	15.0304	16.8033	14.8731	31.3841	31.4712	22.8919	29.6966	24.8486
pgaptmp_002042	pgaptmp_002042	pgaptmp_002042	protein_coding	protein_coding	pgaptmp_002042	0.4452	1305				TRUE	-0.478066	0.0038258	0.0225021	Chromosome_I	2208540	2209844	1305	-	13.0367	8420.02	8557.38	8646.15	7803.89	8573.03	7415.42	7020.68	7109.23	7335.99	8984.15	10679.7	10180	8033.27	7987.1	8413.26	8231.67	7781.32	7497.38	9458.42	9575.2	9957.75	265.865	271.002	276.537	322.155	339.678	278.137	256.154	236.728
pgaptmp_002029	pgaptmp_002029	lpxH	protein_coding	protein_coding	pgaptmp_002029	0.416	738	GO:0009245	GO:0008758,GO:0016462	GO:0005737	TRUE	-0.514087	0.00382797	0.0225021	Chromosome_I	2194979	2195716	738	+	11.0557	2063.76	2231.1	2190.74	1946.17	2118.51	1747.47	1433.69	1644.09	1367.4	2268.24	2202.34	2497.29	2932.57	3433.03	3126.32	2452.31	1951.99	2025.5	2214.01	1943.97	2001.35	115.229	124.941	123.901	142.065	148.429	115.901	92.4975	96.8072
pgaptmp_000074	pgaptmp_000074	lysA	protein_coding	protein_coding	pgaptmp_000074	0.4944	1254	GO:0009089	GO:0008836		TRUE	0.673832	0.00385088	0.0225966	Chromosome_I	81221	82474	1254	+	12.7834	8896.45	7646.46	8400.29	5147.93	5941.79	5041.2	8205.64	10084.7	9726.66	4138.93	4125.31	4557.37	9454.63	8626.43	9377.64	8990.11	9331.19	10292.9	4565.48	6021.77	6454.34	292.333	252.002	279.6	221.156	244.999	196.775	311.564	349.465
pgaptmp_002584	pgaptmp_002584	syd	protein_coding	protein_coding	pgaptmp_002584	0.4725	546			GO:0009898	TRUE	-0.406777	0.00385262	0.0225966	Chromosome_I	2791248	2791793	546	-	9.56313	657.597	661.848	706.559	661.749	761.243	670.456	550.903	567.933	569.341	855.633	927.016	989.284	1023.68	864.64	964.376	827.549	837.517	846.713	680.072	723.811	773.458	49.6278	50.0965	54.0128	65.2927	72.09	60.1049	48.0414	45.2003
pgaptmp_003181	pgaptmp_003181	pgaptmp_003181	protein_coding	protein_coding	pgaptmp_003181	0.4252	2646				TRUE	-0.470268	0.00387762	0.0227179	Chromosome_I	3448761	3451406	2646	+	12.0168	3017.39	3093.61	3148.88	3388.18	3227.26	2304.12	2746.35	2688.16	2796.04	6088.32	4462.74	4222.05	5681.03	8751.85	5636.07	9106.41	7348.58	5618.73	3832.32	3343.16	3883.07	46.9894	48.3189	49.6715	68.9828	63.065	42.6235	49.4195	44.1472
pgaptmp_004518	pgaptmp_004518	pgaptmp_004518	protein_coding	protein_coding	pgaptmp_004518	0.4539	846				TRUE	0.555386	0.00388969	0.0227633	Chromosome_II	1393667	1394512	846	-	7.39804	151.101	185.705	222.178	247.275	213.012	245.751	287.331	316.43	250.538	94.8462	125.174	133.387	81.0103	106.554	109.349	146.633	143.803	140.237	204.525	182.864	168.649	7.35961	9.07181	10.9615	15.7461	13.019	14.2186	16.1713	16.2534
pgaptmp_002746	pgaptmp_002746	trpR	protein_coding	protein_coding	pgaptmp_002746	0.4521	303	GO:0006355	GO:0003700,GO:0043565		TRUE	-0.615744	0.0039186	0.0228811	Chromosome_I	2972564	2972866	303	-	9.86564	671.474	788.585	998.167	967.96	905.299	1227.93	746.17	684.355	707.278	1235.02	1141.08	1219	693.742	776.955	885.329	1100.59	1165.07	912.862	1278	981.859	919.675	91.3155	107.559	137.5	172.099	154.488	198.365	117.254	98.1468
pgaptmp_004803	pgaptmp_004803	pgaptmp_004803	protein_coding	protein_coding	pgaptmp_004803	0.3718	312				TRUE	-1.3614	0.00392	0.0228811	Chromosome_II	1730206	1730517	312	-	7.86324	134.141	163.702	195.223	313.898	350.923	346.361	164.083	138.811	164.68	254.268	286.631	324.203	147.291	165.381	163.364	335.402	256.981	195.802	581.721	403.958	202.711	17.7159	21.684	26.1166	54.1999	58.1569	54.3384	25.0404	19.3334
pgaptmp_001153	pgaptmp_001153	pgaptmp_001153	protein_coding	protein_coding	pgaptmp_001153	0.469	678	GO:0000160,GO:0006355	GO:0000156,GO:0003677		TRUE	0.393878	0.00392284	0.0228811	Chromosome_I	1223025	1223702	678	-	8.75154	614.425	765.702	706.559	579.751	593.975	494.801	718.699	700.774	699.537	284.538	326.542	231.574	260.706	247.516	256.904	294.951	264.97	256.66	527.517	516.097	514.254	37.342	46.6736	43.497	46.0655	45.2983	35.7218	50.4719	44.9144
pgaptmp_002448	pgaptmp_002448	pgaptmp_002448	protein_coding	protein_coding	pgaptmp_002448	0.4585	1590	GO:0006812,GO:0055085,GO:1902600	GO:0015297	GO:0016020	TRUE	-0.421818	0.00396835	0.0231209	Chromosome_I	2664634	2666223	1590	+	10.6084	1447.02	1551.65	1633.66	1499.66	1783.29	1563.57	1212.43	1155.27	1188.65	1826.29	1879.43	1470.96	1989.91	1845.82	2027.56	1417.45	1524.57	1502.92	1426.08	1610.73	1590.12	37.5004	40.3308	42.8851	50.8114	57.9921	48.1342	36.3072	31.5736
pgaptmp_002771	pgaptmp_002771	pgaptmp_002771	protein_coding	protein_coding	pgaptmp_002771	0.4683	852				TRUE	-0.531132	0.00397346	0.0231251	Chromosome_I	3001146	3001997	852	-	12.9677	4280.16	3382.29	4219.75	3383.69	3551.56	2720.58	2585.98	2979.97	3141.58	27471.1	23099.2	24144.8	37653.6	42023.3	43241.5	12148.6	15930.1	14417.9	3603.21	4213.52	4397.33	207.004	164.064	206.723	213.952	215.538	156.299	144.517	151.988
pgaptmp_003669	pgaptmp_003669	pgaptmp_003669	protein_coding	protein_coding	pgaptmp_003669	0.4778	540		GO:0016787		TRUE	0.441318	0.00398041	0.0231321	Chromosome_II	427219	427758	540	+	6.98211	151.101	161.061	132.327	194.104	152.931	171.531	233.132	244.786	220.98	60.5401	79.8213	83.3666	95.7394	103.224	71.1425	70.7883	95.8684	64.8265	151.996	164.387	177.787	11.5301	12.3265	10.2281	19.3645	14.6436	15.5483	20.5561	19.6983
pgaptmp_003263	pgaptmp_003263	rnpA	protein_coding	protein_coding	pgaptmp_003263	0.429	324	GO:0008033	GO:0000049,GO:0004526		TRUE	-0.90586	0.00398345	0.0231321	Chromosome_I	3531476	3531799	324	-	14.506	19717.1	23077.5	23586	20721.1	26064.6	31567.5	18657.2	16743.9	15168.1	24258.4	24666.6	24928.5	23574	25221.1	27027.6	22938.8	19882	19958.6	40043.2	27076.6	24515.5	2507.59	2943.65	3038.44	3445.34	4159.58	4769.01	2741.79	2245.69
pgaptmp_005156	pgaptmp_005156	pgaptmp_005156	protein_coding	protein_coding	pgaptmp_005156	0.4488	459		GO:0008080,GO:0016746		TRUE	0.422221	0.00403633	0.0234123	Chromosome_II	2123413	2123871	459	-	8.99238	531.166	638.965	762.92	1003.83	893.01	853.532	1158.98	1072.43	1114.76	199.782	304.772	300.12	269.543	189.799	148.872	348.885	336.871	285.766	759.982	858.888	796.719	47.6843	57.5315	69.3757	117.818	100.598	91.0206	120.225	101.53
pgaptmp_004387	pgaptmp_004387	pgaptmp_004387	protein_coding	protein_coding	pgaptmp_004387	0.4363	864		GO:0003824		TRUE	0.46548	0.00404059	0.0234123	Chromosome_II	1252936	1253799	864	+	7.79076	171.916	196.266	199.307	265.853	277.871	205.342	332.621	291.056	304.728	175.566	177.784	148.207	269.543	362.949	304.332	182.027	158.449	136.268	231.347	212.811	201.049	8.19899	9.388	9.62829	16.5764	16.6293	11.6332	18.3303	14.6386
pgaptmp_004626	pgaptmp_004626	pgaptmp_004626	protein_coding	protein_coding	pgaptmp_004626	0.4096	708				TRUE	0.469754	0.00404725	0.0234227	Chromosome_II	1533681	1534388	708	-	8.11234	270.594	269.316	214.01	300.445	384.377	216.888	285.846	323.893	319.507	296.647	357.382	331.614	263.652	278.594	223.967	328.66	280.948	292.381	216.26	193.696	235.111	15.7486	15.7206	12.6166	22.8611	28.0716	14.9946	19.2235	19.8795
pgaptmp_000056	pgaptmp_000056	rho	protein_coding	protein_coding	pgaptmp_000056	0.469	1260	GO:0006353	GO:0003723,GO:0005524,GO:0008186		TRUE	-0.575118	0.00405128	0.0234227	Chromosome_I	61583	62842	1260	+	14.3763	19559.1	19562.4	19288.6	20887	21382.4	16006.8	13250.6	15767	14858.5	23384.6	24087.9	25991.9	33909.4	33849.7	34987.6	19724.7	20139	21166.5	19908.2	20621	22877.2	639.641	641.641	638.958	893.039	877.465	621.824	500.725	543.772
pgaptmp_002576	pgaptmp_002576	treR	protein_coding	protein_coding	pgaptmp_002576	0.48	948	GO:0005991,GO:0006355,GO:0045892	GO:0003677		TRUE	-0.509087	0.0040882	0.023588	Chromosome_I	2782125	2783072	948	-	10.2994	1279.73	1209.28	997.35	1150.53	1352.49	917.856	821.158	956.754	916.295	1233	1509.35	1285.7	1777.81	1868.02	1899.77	1314.64	1320.85	1606.11	1076.27	1271.13	1382.42	55.6248	52.7182	43.9117	65.3815	73.7681	47.3913	41.2431	43.856
pgaptmp_004367	pgaptmp_004367	pgaptmp_004367	protein_coding	protein_coding	pgaptmp_004367	0.4766	1557	GO:1902600			TRUE	0.895146	0.00408882	0.023588	Chromosome_II	1231490	1233046	1557	-	12.6738	10732.8	9102.17	8163.41	9620.66	12007.8	6938.76	10097.4	15887.9	14770.5	4348.8	5222.86	4813.03	3776.55	3186.63	3435.92	3418.06	3842.73	4281.19	5578.04	7118.32	8575.33	284.042	241.601	218.839	332.874	398.768	218.135	308.784	443.421
pgaptmp_004163	pgaptmp_004163	tssJ	protein_coding	protein_coding	pgaptmp_004163	0.4351	501	GO:0033103	GO:0003674		TRUE	-0.968515	0.00410124	0.0236337	Chromosome_II	1003903	1004403	501	+	4.22347	10.022	7.04093	10.6188	16.6558	15.7028	9.89602	20.7888	19.4037	26.7429	10.09	36.2824	9.26295	11.7833	23.3087	17.1269	13.4835	21.3041	13.2299	39.1167	36.9551	72.278	0.82428	0.58081	0.884665	1.79099	1.62063	0.966843	1.97572	1.683
pgaptmp_003113	pgaptmp_003113	pgaptmp_003113	protein_coding	protein_coding	pgaptmp_003113	0.4373	606				TRUE	-0.450479	0.00411396	0.0236811	Chromosome_I	3368553	3369158	606	-	10.7086	1628.19	1497.08	1648.36	1412.54	1523.17	1382.97	1216.89	1378.41	1437.78	1604.31	1523.86	1611.75	1620.21	1543.92	1633.64	2674.79	2248.91	3101.09	1692.64	1807.62	1850.15	110.711	102.097	113.533	125.572	129.963	111.705	95.6116	98.8425
pgaptmp_002906	pgaptmp_002906	ilvN	protein_coding	protein_coding	pgaptmp_002906	0.4747	495	GO:0009082	GO:1990610		TRUE	0.707761	0.00411913	0.023685	Chromosome_I	3161202	3161696	495	-	10.0313	572.025	495.506	553.811	748.231	833.613	687.774	769.928	1204.52	1104.2	1237.04	1326.12	1435.76	2315.42	1953.49	2014.39	1862.41	1857.45	2239.82	548.193	601.477	671.271	47.6176	41.37	46.6979	81.4319	87.0769	68.01	74.059	105.742
pgaptmp_001521	pgaptmp_001521	pgaptmp_001521	protein_coding	protein_coding	pgaptmp_001521	0.4699	1611		GO:0042626,GO:0140359	GO:0055052	TRUE	0.546633	0.00413439	0.0237468	Chromosome_I	1579464	1581074	1611	-	5.95555	104.845	100.333	107.005	79.4355	81.9275	66.7982	79.4429	85.8243	72.4872	44.3961	65.3084	40.757	58.9165	54.3869	34.2538	33.7087	38.6137	59.5345	44.7048	49.0611	58.1547	2.68171	2.5739	2.77235	2.65634	2.62953	2.02956	2.34797	2.315
pgaptmp_000403	pgaptmp_000403	rluA	protein_coding	protein_coding	pgaptmp_000403	0.4754	753	GO:0001522,GO:0009451	GO:0003723,GO:0009982		TRUE	-0.671733	0.00416743	0.0239105	Chromosome_I	442286	443038	753	+	8.64729	399.338	362.608	333.267	260.728	307.228	191.323	204.176	206.725	282.911	627.599	703.879	629.881	749.713	762.526	766.758	372.481	513.961	459.077	305.11	358.082	422.037	21.8526	19.9014	18.473	18.6533	21.0965	12.4367	12.9105	11.9298
pgaptmp_003667	pgaptmp_003667	yjjG	protein_coding	protein_coding	pgaptmp_003667	0.4711	675		GO:0008253		TRUE	-0.58812	0.00422281	0.0242019	Chromosome_II	425702	426376	675	+	9.58084	408.589	491.985	534.207	768.09	817.91	1275.76	722.411	622.412	617.901	952.498	1024.98	1052.27	951.502	618.235	696.933	744.962	768.279	728.967	1103.65	939.17	822.474	24.9426	30.1224	33.0329	61.3017	62.6535	92.5121	50.9581	40.0693
pgaptmp_004490	pgaptmp_004490	pgaptmp_004490	protein_coding	protein_coding	pgaptmp_004490	0.4041	339	GO:0000160	GO:0009927		TRUE	0.504429	0.0042633	0.024374	Chromosome_II	1366917	1367255	339	+	7.79995	303.744	394.292	379.01	500.956	443.774	408.211	477.4	415.688	501.781	100.9	94.3343	118.566	85.429	117.653	102.761	119.666	113.178	89.9633	331.933	331.959	281.635	36.9203	48.0685	46.665	79.6093	67.6871	58.941	67.0526	53.285
pgaptmp_004217	pgaptmp_004217	pgaptmp_004217	protein_coding	protein_coding	pgaptmp_004217	0.4658	891	GO:0055085	GO:0022857	GO:0016020	TRUE	-0.525686	0.00426443	0.024374	Chromosome_II	1067499	1068389	891	+	8.37071	193.502	231.471	227.896	423.442	398.714	413.159	303.665	260.458	289.949	419.745	406.363	524.283	381.485	347.41	367.57	235.961	282.279	259.306	453.195	384.843	360.559	8.94881	10.7364	10.6758	25.6024	23.1381	22.6972	16.2274	12.7027
pgaptmp_002632	pgaptmp_002632	pgaptmp_002632	protein_coding	protein_coding	pgaptmp_002632	0.4471	1275				TRUE	-0.495272	0.00427252	0.024374	Chromosome_I	2847703	2848977	1275	-	9.66678	653.742	746.339	727.796	734.137	727.79	799.104	644.453	535.842	579.194	835.453	751.046	798.467	952.975	1094.4	1111.93	979.238	754.964	1869.38	864.479	809.19	736.072	21.1278	24.1918	23.8254	31.0193	29.5148	30.6779	24.0665	18.2627
pgaptmp_001309	pgaptmp_001309	pgaptmp_001309	protein_coding	protein_coding	pgaptmp_001309	0.3356	438				TRUE	0.481913	0.00427485	0.024374	Chromosome_I	1385710	1386147	438	+	9.68663	829.513	1000.69	1007.15	908.383	1019.31	1199.89	1081.76	1064.97	1019.04	823.345	986.882	792.909	677.54	527.22	426.855	920.248	745.643	592.699	816.98	667.741	704.503	78.0382	94.4209	95.9759	111.727	120.331	134.091	117.595	105.657
pgaptmp_001753	pgaptmp_001753	pgaptmp_001753	protein_coding	protein_coding	pgaptmp_001753	0.436	867				TRUE	0.406839	0.00427731	0.024374	Chromosome_I	1849673	1850539	867	+	7.76664	515.747	521.909	472.128	290.836	341.365	219.362	337.076	336.58	368.77	147.314	139.687	96.3347	94.2665	108.774	93.5392	148.318	166.438	128.33	238.053	253.589	265.85	24.5119	24.8781	22.7291	18.0715	20.3584	12.3844	18.5115	16.8697
pgaptmp_001464	pgaptmp_001464	pgaptmp_001464	protein_coding	protein_coding	pgaptmp_001464	0.4592	1374		GO:0005215		TRUE	-0.59365	0.00428061	0.024374	Chromosome_I	1515049	1516422	1374	-	12.8619	4409.68	4758.79	4946.73	3445.19	3544.05	5631.66	3793.96	3560.59	3169.03	21277.8	18210.2	21017.6	17249.3	14107.3	17593.3	11005.9	14042.1	9272.83	5785.92	5116.37	4483.73	132.245	143.137	150.27	135.08	133.37	200.624	131.474	112.609
pgaptmp_000271	pgaptmp_000271	astA	protein_coding	protein_coding	pgaptmp_000271	0.4873	1020	GO:0006527	GO:0008791		TRUE	1.28682	0.00428762	0.0243867	Chromosome_I	286342	287361	1020	+	7.62997	292.18	179.544	175.619	166.558	248.514	100.61	142.552	395.538	288.541	143.278	219.509	183.407	304.893	255.285	227.92	257.872	255.649	313.548	90.5272	103.857	122.956	11.8034	7.27465	7.1864	8.79691	12.5978	4.82805	6.65434	16.851
pgaptmp_003514	pgaptmp_003514	pgaptmp_003514	protein_coding	protein_coding	pgaptmp_003514	0.5082	1098				TRUE	1.05741	0.00429542	0.0243867	Chromosome_II	263909	265006	1098	-	7.66773	574.337	454.14	302.227	222.291	204.136	112.155	310.347	403.747	363.844	64.5761	166.899	74.1036	219.464	187.579	180.491	129.779	190.405	259.306	114.556	133.803	246.742	21.5538	17.0934	11.4887	10.9065	9.61305	4.99976	13.4579	15.9788
pgaptmp_003948	pgaptmp_003948	pgaptmp_003948	protein_coding	protein_coding	pgaptmp_003948	0.4936	393				TRUE	-0.583913	0.00429672	0.0243867	Chromosome_II	716705	717097	393	-	6.91096	110.242	131.137	131.51	188.339	217.108	135.246	98.0044	112.691	142.159	58.5221	128.803	85.2192	108.996	106.554	93.5392	72.4737	110.515	83.3483	177.702	175.218	169.479	11.5588	13.7904	13.9671	25.8174	28.5645	16.8447	11.8737	12.4605
pgaptmp_001149	pgaptmp_001149	pgaptmp_001149	protein_coding	protein_coding	pgaptmp_001149	0.4549	543				TRUE	0.462317	0.0043234	0.0245117	Chromosome_I	1218705	1219247	543	+	9.0767	644.491	646.006	681.237	577.188	535.943	607.781	934.754	841.078	801.582	316.827	361.01	407.57	415.362	356.29	409.728	465.18	479.342	498.767	549.869	602.751	657.148	48.9075	49.1675	52.3648	57.264	51.0343	54.7873	81.9653	67.3091
pgaptmp_003915	pgaptmp_003915	pgaptmp_003915	protein_coding	protein_coding	pgaptmp_003915	0.4521	1179				TRUE	0.715887	0.00433448	0.024548	Chromosome_II	685697	686875	1179	+	12.7978	8919.58	7878.81	7077.84	6762.9	7619.94	4423.52	7619.84	10348.2	9473.31	11109.1	10195.4	6528.53	5424.74	5742.81	3177.7	11831.8	9431.06	7551.62	4718.59	4917.58	6575.64	311.737	276.177	250.569	309.018	334.181	183.648	307.726	381.406
pgaptmp_001238	pgaptmp_001238	pgaptmp_001238	protein_coding	protein_coding	pgaptmp_001238	0.4538	639	GO:0000160			TRUE	-0.559964	0.00434321	0.0245711	Chromosome_I	1321119	1321757	639	+	6.97807	154.185	173.383	133.96	144.137	186.385	122.876	98.7468	100.75	127.38	80.7201	103.405	109.303	148.764	108.774	100.126	107.868	115.841	99.2242	155.349	143.36	178.618	9.94256	11.2137	8.75016	12.1517	15.0818	9.41234	7.35792	6.85145
pgaptmp_002550	pgaptmp_002550	pgaptmp_002550	protein_coding	protein_coding		0.5	1000				TRUE	-0.970962	0.00434891	0.0245769	pgaptmp_002550	1	1000	1000	+	11.9759	1398.45	1537.56	2392.5	2999.33	2698.83	3659.88	1827.93	1488.86	1394.85	13514.6	9814.4	12764.4	5077.13	5466.44	5879.8	13652	9875.78	9835.1	3727.82	3240.58	1977.26	57.6244	63.544	99.8602	161.58	139.547	179.143	87.0347	64.6982
pgaptmp_002789	pgaptmp_002789	srmB	protein_coding	protein_coding	pgaptmp_002789	0.4812	1224	GO:0000027	GO:0003724		TRUE	-0.494827	0.00435698	0.0245869	Chromosome_I	3021501	3022724	1224	+	12.651	6646.12	6646.64	6232.42	5553.44	5893.32	4150.56	4890.57	5494.99	5206.41	7811.69	8976.27	8271.82	5984.45	7498.73	7350.08	7195.12	6400.55	5727.22	7063.92	6579.92	7668.11	223.741	224.421	212.528	244.424	248.956	165.981	190.244	195.085
pgaptmp_003169	pgaptmp_003169	pgaptmp_003169	protein_coding	protein_coding	pgaptmp_003169	0.4829	1377	GO:0055085	GO:0022857		TRUE	-0.682436	0.00436	0.0245869	Chromosome_I	3435843	3437219	1377	-	12.2608	2119.27	1791.92	1860.74	1794.99	1969.67	1455.54	2003.89	2178.44	2363.22	4603.07	6035.58	6120.96	13039.7	11254.8	16237.6	26587.7	27251.9	77593.3	2698.49	3264.79	4251.94	63.4176	53.7806	56.4018	70.2249	73.9613	51.7396	69.2904	68.7464
pgaptmp_002306	pgaptmp_002306	pgaptmp_002306	protein_coding	protein_coding	pgaptmp_002306	0.4299	1998				TRUE	0.479873	0.00437171	0.0246265	Chromosome_I	2508486	2510483	1998	-	9.11607	1398.45	1681.9	1697.37	1191.53	1060.96	1030.84	1538.37	1269.45	1366.7	131.17	197.739	161.175	160.548	129.863	154.142	369.11	312.904	207.709	1017.03	963.382	913.029	28.841	34.7894	35.4587	32.1273	27.4567	25.2538	36.6605	27.6095
pgaptmp_002720	pgaptmp_002720	ppk1	protein_coding	protein_coding	pgaptmp_002720	0.451	2091	GO:0006799	GO:0008976	GO:0009358	TRUE	0.406381	0.00439111	0.0246954	Chromosome_I	2944925	2947015	2091	+	9.71945	1675.99	1652.86	1473.56	1107.61	1076.66	1139.69	1250.3	1262.74	1339.96	538.807	507.954	533.546	606.84	525	526.982	458.438	460.701	539.78	962.83	941.081	907.213	33.0274	32.6681	29.4141	28.5363	26.6238	26.6788	28.4703	26.2419
pgaptmp_000078	pgaptmp_000078	yigB	protein_coding	protein_coding	pgaptmp_000078	0.4854	717				TRUE	-0.402881	0.004398	0.0246954	Chromosome_I	84960	85676	717	+	9.01717	398.567	346.766	372.475	235.103	264.899	220.187	208.631	231.352	218.165	712.355	896.176	861.455	1421.36	1368.55	1570.4	1253.96	1480.63	1812.49	279.964	277.801	292.435	22.9055	19.9875	21.683	17.6646	19.1032	15.0316	13.8545	14.0214
pgaptmp_004850	pgaptmp_004850	pgaptmp_004850	protein_coding	protein_coding	pgaptmp_004850	0.4622	753	GO:0006810	GO:0015291		TRUE	-0.830349	0.00439801	0.0246954	Chromosome_II	1774563	1775315	753	+	7.9193	269.052	238.512	240.148	465.722	513.413	272.141	322.226	429.868	392.698	183.638	145.13	150.06	73.6457	124.313	100.126	170.229	103.857	108.485	519.693	583.636	892.259	14.7231	13.0905	13.3115	33.3193	35.2546	17.6901	20.3751	24.8072
pgaptmp_002540	pgaptmp_002540	pgaptmp_002540	protein_coding	protein_coding		0.5	1000				TRUE	-0.920296	0.00441075	0.0247406	pgaptmp_002540	1	1000	1000	+	13.8571	5304.72	6185.46	7765.61	8739.82	11140.8	16858.7	6855.85	6115.16	5093.11	39817.2	51666.2	47717.2	27679	17181.8	21047.6	42852.2	31174.5	27298.6	14016.6	11041.3	8017.04	218.585	255.631	324.128	470.833	576.049	825.196	326.433	265.733
pgaptmp_000213	pgaptmp_000213	efp	protein_coding	protein_coding	pgaptmp_000213	0.4321	567	GO:0006414	GO:0003746	GO:0005737	TRUE	-1.00927	0.00443064	0.0247997	Chromosome_I	231503	232069	567	+	14.0912	8398.43	11026.1	13021.9	11508.5	10072.3	20394.1	11482.8	8144.35	7959.52	24163.6	26638.6	27714.8	20264.3	17514.8	20363.9	52218.2	43160.8	36742.1	23602.5	16543.2	13557.5	610.342	803.675	958.59	1093.46	918.523	1760.57	964.271	624.181
pgaptmp_003317	pgaptmp_003317	pgaptmp_003317	protein_coding	protein_coding	pgaptmp_003317	0.4776	894	GO:0006355	GO:0003700		TRUE	0.685336	0.0044307	0.0247997	Chromosome_II	53417	54310	894	-	11.2058	2407.59	2513.61	2407.2	4209.44	4124.37	3178.27	4982.63	5588.28	5535.07	1511.48	1436.78	1728.47	1571.6	1370.77	1359.61	1041.6	1167.73	1279.33	2430.27	3712.08	3574.85	110.969	116.199	112.387	253.659	238.541	174.015	265.371	271.63
pgaptmp_003473	pgaptmp_003473	pgaptmp_003473	protein_coding	protein_coding	pgaptmp_003473	0.4713	1239		GO:0004386,GO:0005524,GO:0016887		TRUE	-0.516003	0.00444024	0.0248267	Chromosome_II	222292	223530	1239	+	9.15083	396.254	307.161	370.841	564.376	649.958	540.158	449.929	473.153	503.892	881.868	821.797	931.853	584.747	607.135	675.854	557.879	508.635	539.78	600.162	605.937	783.427	13.1783	10.2456	12.4927	24.5393	27.1243	21.3394	17.2904	16.5946
pgaptmp_001601	pgaptmp_001601	pgaptmp_001601	protein_coding	protein_coding	pgaptmp_001601	0.3968	252				TRUE	0.690688	0.00445841	0.0248887	Chromosome_I	1669604	1669855	252	+	8.29117	393.942	505.187	526.039	511.846	329.076	474.184	600.648	373.895	446.184	302.701	257.605	135.239	147.291	164.271	114.618	552.823	387.468	205.063	278.287	294.367	272.496	64.4154	82.8502	87.1281	109.422	67.521	92.1042	113.489	64.4743
[truncated: 4,335 more rows]
[truncated: 14 more columns]
