# Supplementary material for: Phage Resistance in Vibrio harveyi: Evolutionary strategies and physiological trade-offs
Source: Research Square preprint supplement (doi:10.21203/rs.3.rs-7655806/v1), 2025-10-10
Supplement: Supplementary file 5 [file 558be9d9d0429df49b985d24.xlsx]

## Sheet: Sheet1
gene_id	transcript_id	gene_name	type	biotypes	description	gc	featWidth	GO BP	GO MF	GO CC	isPresent	log2 Ratio	pValue	fdr	seqnames	start	end	width	strand	log2 Mean	R10D4_1 [normalized count]	R10D4_2 [normalized count]	R10D4_3 [normalized count]	R3D4_1 [normalized count]	R3D4_2 [normalized count]	R3D4_3 [normalized count]	R4D4_1 [normalized count]	R4D4_2 [normalized count]	R4D4_3 [normalized count]	VH2_T10_1 [normalized count]	VH2_T10_2 [normalized count]	VH2_T10_3 [normalized count]	VH2_T25_1 [normalized count]	VH2_T25_2 [normalized count]	VH2_T25_3 [normalized count]	VH2_T45_1 [normalized count]	VH2_T45_2 [normalized count]	VH2_T45_3 [normalized count]	VH2_WT1 [normalized count]	VH2_WT2 [normalized count]	VH2_WT3 [normalized count]	R10D4_1 [FPKM]	R10D4_2 [FPKM]	R10D4_3 [FPKM]	R3D4_1 [FPKM]	R3D4_2 [FPKM]	R3D4_3 [FPKM]	R4D4_1 [FPKM]	R4D4_2 [FPKM]
pgaptmp_000746	pgaptmp_000746	glpD	protein_coding	protein_coding	pgaptmp_000746	0.4705	1560	GO:0006072	GO:0004368	GO:0009331	TRUE	4.44945	4.3612e-09	9.5263e-06	Chromosome_I	781702	783261	1560	-	11.6204	24928.6	22165.7	18683.4	9672.55	8956.73	6257.59	12715.3	13796.1	13225	599.347	1043.12	820.698	1097.32	1301.96	1400.45	996.092	930.723	2669.79	955.565	920.055	981.984	658.462	587.218	499.887	334.026	296.872	196.343	388.093	384.298
pgaptmp_000492	pgaptmp_000492	pgaptmp_000492	protein_coding	protein_coding	pgaptmp_000492	0.4811	318				TRUE	3.96592	7.81971e-09	9.5263e-06	Chromosome_I	512944	513261	318	+	6.60846	411.673	357.327	460.693	17.937	21.8473	23.9154	40.8352	32.0908	30.9654	258.304	313.843	264.921	228.302	208.668	184.444	219.107	259.644	240.784	18.4407	21.0262	14.9541	53.3437	46.4388	60.4679	3.0387	3.55235	3.68115	6.1142	4.38522
pgaptmp_004581	pgaptmp_004581	artM	protein_coding	protein_coding	pgaptmp_004581	0.4783	669	GO:0071705	GO:0022857	GO:0016020,GO:0043190	TRUE	2.96302	1.01774e-08	9.5263e-06	Chromosome_II	1470226	1470894	669	-	11.4298	6606.81	7763.51	6876.9	8609.14	11072.5	8061.14	11690.7	16096.2	12957.6	1124.03	1603.68	1526.53	913.206	769.186	839.218	1371.94	1380.77	1386.49	794.069	912.409	870.659	406.934	479.594	429.05	693.263	855.783	589.797	832.048	1045.52
pgaptmp_000306	pgaptmp_000306	argC	protein_coding	protein_coding	pgaptmp_000306	0.4657	1005	GO:0006526,GO:0006592	GO:0003942,GO:0070401		TRUE	3.2918	1.35088e-08	9.5263e-06	Chromosome_I	322301	323305	1005	+	12.7476	29874	31210.7	34402.5	24842.8	24187.7	21462.8	42245.1	44671.9	42059.5	2022.04	2000.98	2141.6	1279.96	1428.49	1467.64	2764.11	2520.54	2459.44	2751.02	3287.73	3233.4	1224.86	1283.45	1428.78	1331.68	1244.44	1045.33	2001.44	1931.55
pgaptmp_004582	pgaptmp_004582	artQ	protein_coding	protein_coding	pgaptmp_004582	0.4652	690	GO:0055085,GO:0071705	GO:0022857	GO:0016020,GO:0043190	TRUE	3.03846	1.39973e-08	9.5263e-06	Chromosome_II	1470891	1471580	690	-	11.8402	10252.5	11446.8	10426	13449.6	16490.6	12772.5	17487.8	25378.6	20893.9	1307.67	1861.29	1850.74	1048.71	873.52	865.567	1486.55	1491.29	1472.49	1073.47	1262.85	1377.44	612.264	685.609	630.682	1050.08	1235.76	906.063	1206.76	1598.29
pgaptmp_000496	pgaptmp_000496	pgaptmp_000496	protein_coding	protein_coding	pgaptmp_000496	0.4148	135				TRUE	3.62958	1.43617e-08	9.5263e-06	Chromosome_I	515117	515251	135	+	8.88148	1658.25	1249.77	1622.23	128.122	118.795	75.0448	156.658	170.156	145.678	1448.93	1460.37	1402.41	796.846	1190.96	1441.29	1191.6	1193.03	1140.42	119.585	107.042	102.186	506.146	382.593	501.555	51.1273	45.4996	27.2095	55.2526	54.771
pgaptmp_004735	pgaptmp_004735	pgaptmp_004735	protein_coding	protein_coding	pgaptmp_004735	0.442	1371				TRUE	-2.91253	1.48833e-08	9.5263e-06	Chromosome_II	1651872	1653242	1371	-	9.27054	164.977	168.102	179.703	982.694	923.05	771.065	853.826	1008.99	1024.67	607.419	789.143	1007.81	518.466	456.184	612.616	397.763	438.065	505.382	1327.17	1078.71	1420.64	4.95844	5.06731	5.47089	38.614	34.8122	27.5287	29.6527	31.9808
pgaptmp_000765	pgaptmp_000765	argA	protein_coding	protein_coding	pgaptmp_000765	0.4589	1338	GO:0006526	GO:0004042		TRUE	3.08616	1.5683e-08	9.5263e-06	Chromosome_I	811229	812566	1338	-	11.4376	13431	14332.7	15924.1	11941.6	12283	9677.49	18104.1	20529.9	19280.2	641.725	807.284	691.016	500.791	419.556	469.014	810.694	790.915	658.849	1550.7	1778.31	1545.25	413.629	442.704	496.753	480.806	474.67	354.029	644.248	666.758
pgaptmp_004730	pgaptmp_004730	pgaptmp_004730	protein_coding	protein_coding	pgaptmp_004730	0.4413	843			GO:0016020	TRUE	-3.0167	1.69098e-08	9.5263e-06	Chromosome_II	1647144	1647986	843	-	8.01165	45.4844	48.4064	51.4603	368.991	443.091	372.75	413.549	585.844	534.857	268.394	313.843	420.538	259.233	231.977	355.713	171.914	202.389	222.262	401.226	370.826	505.115	2.22328	2.37311	2.54792	23.5804	27.1775	21.6433	23.3578	30.1989
pgaptmp_004583	pgaptmp_004583	pgaptmp_004583	protein_coding	protein_coding	pgaptmp_004583	0.4385	732				TRUE	2.96202	1.81108e-08	9.5263e-06	Chromosome_II	1471582	1472313	732	-	11.9509	14981.3	15185.5	14869.6	20458.5	22028.3	13011.6	23045.9	32620.7	30002.7	1172.46	1493.02	1376.48	771.807	762.526	803.647	1075.31	1179.71	891.695	1628.93	1770.66	2105.2	843.331	857.355	847.869	1505.66	1556.01	870.068	1499.05	1936.51
pgaptmp_004736	pgaptmp_004736	cpaB	protein_coding	protein_coding	pgaptmp_004736	0.4436	825				TRUE	-3.54133	2.18559e-08	1.04511e-05	Chromosome_II	1653242	1654066	825	-	9.14925	129.515	139.058	159.282	1064.05	1075.98	1067.12	1015.68	1036.61	1057.75	490.375	580.519	761.415	399.16	369.609	557.283	279.782	258.312	296.35	1973.16	1362.88	1633.32	6.46881	6.96603	8.05849	69.4821	67.4365	63.313	58.6187	54.6007
pgaptmp_004584	pgaptmp_004584	artP	protein_coding	protein_coding	pgaptmp_004584	0.4444	729	GO:0003333	GO:0005524,GO:0015424	GO:0043190	TRUE	2.91589	2.68249e-08	1.11523e-05	Chromosome_II	1472402	1473130	729	-	11.4342	9717.48	10265.7	10068.3	12387.4	14036.9	8603.77	15955.4	19130.6	18109.8	1105.87	1364.22	1196.77	673.122	578.277	699.568	620.24	707.03	538.457	1075.15	1225.89	1486.27	549.268	581.972	576.458	915.416	995.607	577.689	1042.11	1140.35
pgaptmp_004738	pgaptmp_004738	pgaptmp_004738	protein_coding	protein_coding	pgaptmp_004738	0.4251	207				TRUE	-4.67989	2.75626e-08	1.11523e-05	Chromosome_II	1654677	1654883	207	-	9.48004	77.0923	80.0906	102.104	1835.98	1136.74	2291.75	2096.7	1313.48	1534.9	1049.36	772.816	1287.55	440.401	350.74	500.632	407.875	383.474	449.816	2979.58	1812.08	2052.03	15.3461	15.9902	20.5879	477.818	283.946	541.914	482.279	275.735
pgaptmp_000750	pgaptmp_000750	glpT	protein_coding	protein_coding	pgaptmp_000750	0.4686	1368	GO:0015794	GO:0015169	GO:0016020	TRUE	2.7196	3.24911e-08	1.22074e-05	Chromosome_I	787727	789094	1368	+	9.45868	1743.83	1811.28	1674.5	811.01	785.139	1042.38	882.039	850.78	838.881	433.871	741.976	327.909	649.555	437.315	403.141	896.652	969.336	1760.9	215.142	278.438	245.081	52.5262	54.7194	51.0906	31.9378	29.6759	37.2969	30.6997	27.0252
pgaptmp_004733	pgaptmp_004733	pgaptmp_004733	protein_coding	protein_coding	pgaptmp_004733	0.4364	1242				TRUE	-3.02244	4.33177e-08	1.44635e-05	Chromosome_II	1650155	1651396	1242	-	9.11945	129.515	117.936	102.104	663.03	941.484	581.391	823.385	1154.52	1006.38	599.347	792.771	1107.85	702.58	533.879	649.505	342.143	412.767	502.736	870.626	869.72	1134.85	4.29691	3.92433	3.43132	28.7591	39.1954	22.9129	31.5656	40.3941
pgaptmp_000488	pgaptmp_000488	pgaptmp_000488	protein_coding	protein_coding	pgaptmp_000488	0.4181	177				TRUE	5.65494	4.39956e-08	1.44635e-05	Chromosome_I	510152	510328	177	+	7.03762	2760.67	1813.92	1636.93	94.8101	88.7548	46.1814	81.6703	133.587	182.274	155.386	197.739	185.259	119.306	105.444	90.9043	53.9339	53.2602	62.1805	22.9112	33.1322	42.3699	642.688	423.532	386.009	28.8566	25.9276	12.7711	21.9697	32.7966
pgaptmp_000751	pgaptmp_000751	glpQ	protein_coding	protein_coding	pgaptmp_000751	0.4593	1056	GO:0006629	GO:0008081		TRUE	2.12706	5.63069e-08	1.67835e-05	Chromosome_I	789148	790203	1056	+	8.73395	925.878	859.874	893.613	465.082	423.292	402.438	394.245	458.227	444.776	393.511	542.422	329.761	380.012	341.86	268.761	487.091	544.586	769.98	181.054	195.607	191.911	36.1284	33.6521	35.3205	23.7263	20.7262	18.6538	17.776	18.8562
pgaptmp_004732	pgaptmp_004732	pgaptmp_004732	protein_coding	protein_coding	pgaptmp_004732	0.4772	1272				TRUE	-3.04833	6.02843e-08	1.67835e-05	Chromosome_II	1648887	1650158	1272	-	9.04269	86.3433	88.0117	82.4999	563.736	836.344	558.301	787.005	1191.84	928.963	615.491	879.849	1130.08	815.994	512.791	843.17	404.505	478.011	616.513	605.75	664.555	922.167	2.79705	2.85953	2.70712	23.8755	33.9971	21.4839	29.4593	40.7162
pgaptmp_002671	pgaptmp_002671	pgaptmp_002671	protein_coding	protein_coding	pgaptmp_002671	0.4956	1695				TRUE	2.40187	6.06249e-08	1.67835e-05	Chromosome_I	2891177	2892871	1695	-	9.89031	2756.05	2908.79	2920.17	2556.67	2671.52	2240.62	3308.39	3160.57	3426.61	334.989	301.144	314.94	381.485	389.588	405.776	498.889	446.054	451.139	454.313	575.99	499.3	67.0001	70.9225	71.9084	81.2585	81.4953	64.7042	92.9351	81.0277
pgaptmp_004145	pgaptmp_004145	pgaptmp_004145	protein_coding	protein_coding	pgaptmp_004145	0.4605	519	GO:0033103			TRUE	-4.39336	6.52427e-08	1.71588e-05	Chromosome_II	980332	980850	519	+	7.58798	76.3214	88.8918	115.173	154.387	161.124	262.245	412.806	297.773	263.206	155.386	170.527	81.514	122.252	132.082	82.9996	67.4174	74.5643	43.6586	2552.64	1903.83	1551.07	6.0595	7.07841	9.26243	16.0253	16.0523	24.7327	37.8714	24.9319
pgaptmp_000487	pgaptmp_000487	pgaptmp_000487	protein_coding	protein_coding	pgaptmp_000487	0.4416	231				TRUE	4.04619	7.55737e-08	1.89294e-05	Chromosome_I	509641	509871	231	+	5.03041	444.822	308.041	272.005	30.7492	19.1164	14.844	41.5776	32.0908	38.7068	18.162	27.2118	40.757	27.9854	18.8689	21.0793	8.42718	17.3096	21.1678	15.0879	11.4688	12.4617	79.3474	55.111	49.1479	7.17111	4.27896	3.14538	8.56999	6.03679
pgaptmp_002672	pgaptmp_002672	pgaptmp_002672	protein_coding	protein_coding	pgaptmp_002672	0.4587	1524			GO:0016020	TRUE	3.08251	8.66444e-08	2.07159e-05	Chromosome_I	2893073	2894596	1524	-	11.5118	15318.2	20098.3	22140.2	17869.1	16066	21691.3	29606.2	28362.3	25291	484.321	513.396	509.463	391.795	341.86	345.173	487.091	532.602	433.94	2119.57	2341.55	1967.29	414.173	545.026	606.37	631.659	545.088	696.679	924.977	808.712
pgaptmp_001098	pgaptmp_001098	imuA	protein_coding	protein_coding	pgaptmp_001098	0.4805	693	GO:0009432,GO:0051782			TRUE	2.23074	9.28551e-08	2.12356e-05	Chromosome_I	1170297	1170989	693	-	8.26452	1076.21	1094.87	1083.93	189.62	202.771	164.109	245.753	273.891	265.317	328.935	299.33	290.857	219.464	278.594	285.887	278.097	290.268	287.089	192.79	240.845	210.188	63.9913	65.2934	65.2846	14.7406	15.1292	11.5913	16.8849	17.1744
pgaptmp_004152	pgaptmp_004152	tssA	protein_coding	protein_coding	pgaptmp_004152	0.4569	1578				TRUE	-2.49485	1.00432e-07	2.1661e-05	Chromosome_II	989039	990616	1578	+	7.4582	110.242	99.4532	96.386	181.933	187.751	183.901	227.192	258.219	270.244	135.206	156.014	124.124	103.104	134.302	100.126	133.149	139.808	88.6403	505.723	558.787	687.887	2.87871	2.60467	2.54946	6.2111	6.15203	5.7044	6.85518	7.1108
pgaptmp_002758	pgaptmp_002758	pgaptmp_002758	protein_coding	protein_coding	pgaptmp_002758	0.4613	1485				TRUE	2.65923	1.03114e-07	2.1661e-05	Chromosome_I	2985442	2986926	1485	+	10.7767	10150.7	12932.4	13436.1	4914.11	4113.44	5030.48	10186.5	8376.45	7632.98	193.728	547.865	329.761	366.756	300.793	287.205	283.153	327.55	1793.97	1785.96	1997.49	1688.15	281.663	359.911	377.647	178.272	143.226	165.812	326.612	245.116
pgaptmp_001557	pgaptmp_001557	pgaptmp_001557	protein_coding	protein_coding	pgaptmp_001557	0.4676	1512				TRUE	2.53023	1.14081e-07	2.1661e-05	Chromosome_I	1614979	1616490	1512	+	8.03696	1254.29	1152.07	1070.05	226.775	243.734	201.219	245.011	220.158	223.796	119.062	99.7767	118.566	154.656	194.239	188.396	286.524	303.583	641.65	156.467	184.776	217.665	34.1826	31.4898	29.5388	8.07995	8.33506	6.51404	7.71554	6.32732
pgaptmp_000497	pgaptmp_000497	pgaptmp_000497	protein_coding	protein_coding	pgaptmp_000497	0.485	831				TRUE	3.73253	1.14369e-07	2.1661e-05	Chromosome_I	515254	516084	831	+	10.6803	5281.59	4084.62	5583.86	366.428	407.589	318.322	520.463	544.051	578.49	5369.91	7078.7	6150.6	4440.83	3862.58	5192.09	3156.82	3686.94	3475.49	446.489	303.924	299.081	261.892	203.139	280.462	23.7548	25.361	18.7499	29.8209	28.4496
pgaptmp_004734	pgaptmp_004734	pgaptmp_004734	protein_coding	protein_coding	pgaptmp_004734	0.4172	477				TRUE	-3.53535	1.15306e-07	2.1661e-05	Chromosome_II	1651399	1651875	477	-	7.64497	42.4008	32.5643	28.5891	280.587	342.73	173.18	291.043	367.179	382.845	246.196	281.189	416.833	151.71	208.668	255.586	102.812	167.77	179.927	436.99	367.003	579.885	3.6628	2.8214	2.50163	31.6893	37.1516	17.7711	29.0517	33.45
pgaptmp_004731	pgaptmp_004731	pgaptmp_004731	protein_coding	protein_coding	pgaptmp_004731	0.443	903				TRUE	-2.69896	1.32075e-07	2.39557e-05	Chromosome_II	1647983	1648885	903	-	8.00542	57.8192	54.5672	62.896	372.194	445.14	330.692	447.702	591.068	520.078	274.448	281.189	346.435	288.691	238.636	360.982	150.004	183.748	211.678	342.551	360.631	505.946	2.63841	2.49739	2.90721	22.2047	25.489	17.9254	23.6066	28.4438
pgaptmp_004739	pgaptmp_004739	pgaptmp_004739	protein_coding	protein_coding	pgaptmp_004739	0.4007	891	GO:0006355	GO:0003677,GO:0003700		TRUE	-3.37129	1.42827e-07	2.50424e-05	Chromosome_II	1655362	1656252	891	+	9.31455	142.621	166.342	195.223	1302.36	1406.42	1928.08	1542.08	1299.3	1247.06	450.015	480.742	489.084	514.047	412.896	548.061	283.153	356.844	298.996	2141.92	1618.38	1384.91	6.59573	7.71554	9.1452	78.7438	81.6173	105.92	82.4068	63.3681
pgaptmp_000493	pgaptmp_000493	pgaptmp_000493	protein_coding	protein_coding	pgaptmp_000493	0.4746	531				TRUE	3.44857	1.69175e-07	2.74853e-05	Chromosome_I	513254	513784	531	+	6.38984	354.624	229.711	301.411	18.5776	19.1164	16.4934	29.6983	28.3593	29.5579	266.376	275.746	274.183	216.518	205.338	159.412	124.722	182.416	187.864	14.5291	21.6633	22.4311	27.519	17.8784	23.6922	1.88478	1.86147	1.52036	2.66299	2.32081
pgaptmp_000491	pgaptmp_000491	pgaptmp_000491	protein_coding	protein_coding	pgaptmp_000491	0.4834	1959				TRUE	4.31791	1.69405e-07	2.74853e-05	Chromosome_I	510917	512875	1959	+	7.28407	1288.21	943.485	870.742	73.67	61.4456	50.3048	69.791	88.8094	110.49	254.268	228.579	268.626	204.735	235.307	218.697	116.295	199.726	202.417	29.6169	56.707	42.3699	27.0964	19.9041	18.5522	2.02591	1.62181	1.25692	1.69628	1.96998
pgaptmp_000309	pgaptmp_000309	argH	protein_coding	protein_coding	pgaptmp_000309	0.4821	1875	GO:0042450	GO:0004056		TRUE	3.04862	1.72437e-07	2.74853e-05	Chromosome_I	325674	327548	1875	+	12.7254	28040.8	24722.5	21808.6	15109.4	18420.7	9776.45	24665.9	39322.4	34445.5	2244.02	2851.8	2702.93	2705.74	2344.19	2399.08	2969.74	3495.2	3232.06	2307.33	3002.92	3301.53	616.236	544.92	485.475	434.12	507.983	255.219	626.367	911.332
pgaptmp_004737	pgaptmp_004737	pgaptmp_004737	protein_coding	protein_coding	pgaptmp_004737	0.3539	438				TRUE	-4.32942	1.83077e-07	2.77427e-05	Chromosome_II	1654088	1654525	438	-	9.0084	94.0526	113.535	85.7672	1151.17	1267.15	1971.78	1352.01	1340.35	1221.73	389.475	489.813	644.702	365.283	256.395	430.807	146.633	151.792	178.604	2785.11	1715.86	1502.05	8.8482	10.7127	8.17313	141.589	149.588	220.352	146.974	132.979
pgaptmp_000430	pgaptmp_000430	pgaptmp_000430	protein_coding	protein_coding	pgaptmp_000430	0.4687	1005	GO:0006520,GO:0006591	GO:0004585,GO:0016597		TRUE	3.6372	1.84599e-07	2.77427e-05	Chromosome_I	463131	464135	1005	-	12.1547	28576.6	24672.3	27236.4	20683.3	21990	12215.8	27487.3	35642.4	34932.5	1138.15	1298.91	1393.15	985.379	895.719	986.773	996.092	1295.56	1006.79	1419.38	2369.59	2378.53	1171.66	1014.58	1131.16	1108.71	1131.37	594.962	1302.26	1541.13
pgaptmp_000489	pgaptmp_000489	pgaptmp_000489	protein_coding	protein_coding	pgaptmp_000489	0.4237	354				TRUE	5.56402	1.96961e-07	2.87781e-05	Chromosome_I	510351	510704	354	+	7.44652	3732.04	2078.84	2197.27	121.716	118.795	49.4801	115.081	184.336	237.871	215.926	199.553	209.343	106.05	170.93	165.999	84.2718	94.5369	78.0564	29.0581	54.7955	58.9855	434.411	242.694	259.073	18.5228	17.3516	6.84164	15.4786	22.6279
pgaptmp_000494	pgaptmp_000494	pgaptmp_000494	protein_coding	protein_coding	pgaptmp_000494	0.4958	474				TRUE	3.54665	2.08487e-07	2.88801e-05	Chromosome_I	513771	514244	474	+	6.53592	358.479	220.029	282.623	21.1401	21.1646	18.9674	19.3039	34.3297	26.0391	234.088	362.824	363.108	344.662	206.448	255.586	207.309	291.6	242.107	13.9703	15.2918	22.4311	31.1633	19.1842	24.8869	2.40266	2.30874	1.95867	1.9391	3.14723
pgaptmp_004728	pgaptmp_004728	pgaptmp_004728	protein_coding	protein_coding	pgaptmp_004728	0.4224	483	GO:0009297			TRUE	-2.78703	2.08639e-07	2.88801e-05	Chromosome_II	1645925	1646407	483	-	6.99833	30.8369	25.5234	22.0544	190.901	227.349	150.09	149.976	255.234	233.648	159.422	199.553	277.889	135.508	124.313	176.539	75.8446	77.2273	91.2862	187.201	196.244	264.189	2.63076	2.1839	1.90585	21.2925	24.3383	15.2103	14.7846	22.963
pgaptmp_001179	pgaptmp_001179	pgaptmp_001179	protein_coding	protein_coding	pgaptmp_001179	0.4317	1200	GO:0009372	GO:0061579		TRUE	1.75322	2.32652e-07	3.13783e-05	Chromosome_I	1256827	1258026	1200	-	10.8653	6058.68	6478.54	6315.74	4047.36	3421.84	2279.38	5488.24	5344.99	5323.24	922.228	722.02	426.096	583.274	947.886	525.664	1248.91	1095.83	624.451	1762.49	1819.08	1729.69	208.044	223.12	219.677	181.7	147.442	92.9756	217.763	193.554
pgaptmp_000429	pgaptmp_000429	pgaptmp_000429	protein_coding	protein_coding	pgaptmp_000429	0.4048	126				TRUE	3.38617	2.42448e-07	3.17248e-05	Chromosome_I	462936	463061	126	-	8.9824	2439.97	2176.53	2005.32	1784.74	1730.04	758.695	2061.06	3018.77	3012.09	193.728	161.457	224.164	126.671	155.391	159.412	178.656	234.345	190.51	133.556	228.102	225.973	797.944	713.897	664.284	763.076	709.951	294.734	778.849	1041.11
pgaptmp_000495	pgaptmp_000495	pgaptmp_000495	protein_coding	protein_coding	pgaptmp_000495	0.5065	768				TRUE	2.46999	2.47285e-07	3.17248e-05	Chromosome_I	514210	514977	768	+	7.16385	380.065	273.716	313.663	41.6396	36.1847	49.4801	57.9117	77.615	49.9669	292.611	377.337	351.992	413.889	217.548	270.078	237.646	320.893	321.486	51.9693	45.8753	51.5085	20.3918	14.7293	17.0468	2.92085	2.43617	3.15357	3.59036	4.39159
pgaptmp_004726	pgaptmp_004726	pgaptmp_004726	protein_coding	protein_coding	pgaptmp_004726	0.4554	1548	GO:0009297			TRUE	-2.68729	2.71892e-07	3.40513e-05	Chromosome_II	1643826	1645373	1548	-	8.40344	86.3433	68.6491	65.3465	405.505	575.541	336.465	430.625	672.414	586.935	415.709	555.121	774.383	443.347	341.86	457.156	171.914	328.882	291.058	425.813	449.833	604.809	2.29835	1.83276	1.76194	14.112	19.2242	10.639	13.2453	18.8757
pgaptmp_002264	pgaptmp_002264	pgaptmp_002264	protein_coding	protein_coding	pgaptmp_002264	0.4384	771				TRUE	1.80145	2.88974e-07	3.53489e-05	Chromosome_I	2454086	2454856	771	-	8.2783	664.535	680.33	751.484	619.468	652.007	515.418	629.604	654.503	662.238	145.296	190.483	163.028	162.021	160.941	169.952	195.511	223.693	183.895	168.761	198.793	190.249	35.5158	36.4676	40.6824	43.2842	43.7262	32.7219	38.8817	36.8888
pgaptmp_004151	pgaptmp_004151	pgaptmp_004151	protein_coding	protein_coding	pgaptmp_004151	0.4343	2001				TRUE	-1.86359	3.14919e-07	3.76471e-05	Chromosome_II	987039	989039	2001	+	6.87261	67.8412	84.4912	78.4158	158.23	148.152	124.525	152.946	129.856	182.977	102.918	96.1484	68.5459	86.9019	89.9048	75.0949	77.53	103.857	64.8265	274.376	266.332	316.528	1.39703	1.74504	1.63568	4.25997	3.82829	3.04609	3.63935	2.82002
pgaptmp_000506	pgaptmp_000506	pgaptmp_000506	protein_coding	protein_coding	pgaptmp_000506	0.4677	201				TRUE	2.72739	3.3786e-07	3.94921e-05	Chromosome_I	519418	519618	201	+	7.80928	551.21	402.213	537.475	61.4984	67.5902	45.3568	75.7306	54.4797	57.0045	665.941	1063.08	948.527	798.319	489.482	642.917	358.998	499.315	455.108	77.6746	59.8928	58.1547	113	82.6994	111.61	16.4828	17.3873	11.0453	17.9394	11.7781
pgaptmp_004729	pgaptmp_004729	pgaptmp_004729	protein_coding	protein_coding	pgaptmp_004729	0.4385	723				TRUE	-3.17742	3.47057e-07	3.96852e-05	Chromosome_II	1646410	1647132	723	-	7.46244	40.8589	33.4444	23.6881	281.868	391.204	250.699	247.238	419.419	351.176	165.476	261.234	309.383	187.06	170.93	225.285	82.5863	98.5314	127.007	291.699	310.296	424.529	2.32866	1.91173	1.36752	21.0025	27.9775	16.9726	16.2821	25.2085
pgaptmp_000490	pgaptmp_000490	pgaptmp_000490	protein_coding	protein_coding	pgaptmp_000490	0.4192	198				TRUE	5.44894	3.91069e-07	4.37665e-05	Chromosome_I	510701	510898	198	+	6.66501	1982.04	1278.81	1150.91	72.3888	63.4938	28.0387	66.0787	97.765	156.235	125.116	90.7061	83.3666	70.6999	79.9154	96.1741	64.0465	90.5424	66.1495	12.2938	33.1322	31.5697	412.483	266.921	242.616	19.6956	16.581	6.93148	15.8902	21.4563
pgaptmp_001902	pgaptmp_001902	pgaptmp_001902	protein_coding	protein_coding	pgaptmp_001902	0.4658	1419				TRUE	1.96853	4.13205e-07	4.52804e-05	Chromosome_I	2044847	2046265	1419	-	8.78998	2850.1	2921.99	2651.43	1336.31	1238.47	1205.67	2472.38	2544.88	2289.33	72.6481	65.3084	77.8088	79.5373	78.8055	80.3647	101.126	81.2219	109.808	591.78	765.863	678.748	82.763	85.1016	77.99	50.7328	45.1281	41.5889	82.9595	77.933
pgaptmp_002263	pgaptmp_002263	pgaptmp_002263	protein_coding	protein_coding	pgaptmp_002263	0.4397	771	GO:0006865		GO:0030288,GO:0055052	TRUE	1.728	5.75413e-07	6.17688e-05	Chromosome_I	2453236	2454006	771	-	8.20945	606.716	654.807	624.059	578.47	534.577	493.152	556.843	644.801	686.166	175.566	174.156	194.522	178.223	153.171	137.015	170.229	219.698	174.635	167.084	194.97	164.495	32.4257	35.0995	33.7841	40.4194	35.8509	31.3083	34.3883	36.342
pgaptmp_000312	pgaptmp_000312	pgaptmp_000312	protein_coding	protein_coding	pgaptmp_000312	0.4335	729		GO:0016491		TRUE	1.74985	5.92775e-07	6.236e-05	Chromosome_I	330060	330788	729	-	9.47863	2853.19	3062.81	2885.86	675.201	565.983	573.145	1152.29	991.084	1130.94	322.881	415.434	314.94	294.583	342.97	386.014	482.035	489.994	519.935	842.127	889.472	742.719	161.273	173.634	165.23	49.8965	40.1439	38.4831	75.2607	59.0772
pgaptmp_004347	pgaptmp_004347	pgaptmp_004347	protein_coding	protein_coding	pgaptmp_004347	0.4342	2172	GO:0055085	GO:0022857	GO:0019867	TRUE	-1.61705	6.26843e-07	6.46509e-05	Chromosome_II	1208721	1210892	2172	-	11.478	1796.25	1710.07	1846.85	5625.18	6395.81	4106.03	2473.13	2790.41	2810.11	2990.68	3753.42	2604.74	1640.83	1878.01	1420.22	2639.39	2199.65	2087.68	5042.14	4846.86	5839.56	34.0773	32.5383	35.4906	139.521	152.258	92.5326	54.2149	55.8271
pgaptmp_002338	pgaptmp_002338	pgaptmp_002338	protein_coding	protein_coding	pgaptmp_002338	0.4568	1215	GO:0009058	GO:0003824,GO:0030170		TRUE	2.03696	6.43517e-07	6.50943e-05	Chromosome_I	2541439	2542653	1215	+	11.8729	20985.3	19843.1	18718.5	2210.74	2297.38	1397.81	2576.33	2960.56	3010.68	2393.35	3281.75	2589.92	2847.14	2371.93	2562.45	2770.86	3308.79	2847.07	3963.64	4697.12	5196.54	711.7	674.956	643.036	98.0225	97.769	56.3126	100.962	105.885
pgaptmp_002399	pgaptmp_002399	pgaptmp_002399	protein_coding	protein_coding	pgaptmp_002399	0.4892	1200	GO:1901642	GO:0005337,GO:0015293	GO:0005886	TRUE	-1.47997	7.11129e-07	7.05762e-05	Chromosome_I	2610483	2611682	1200	-	11.4594	1336.01	1422.27	1449.87	1675.19	1913.69	2088.89	1533.92	1497.82	1442.71	5989.43	6144.43	8101.38	5169.93	4082.35	5242.15	2907.38	3292.81	2721.39	3498.15	3873.92	3853.16	45.8761	48.9826	50.4301	75.2051	82.4583	85.2052	60.863	54.2395
pgaptmp_000308	pgaptmp_000308	pgaptmp_000308	protein_coding	protein_coding	pgaptmp_000308	0.4658	1215	GO:0006526	GO:0004055,GO:0005524		TRUE	3.49877	7.61883e-07	7.42131e-05	Chromosome_I	324209	325423	1215	+	11.6607	20102.6	17591.8	14378.7	15224.7	18203.6	8273.9	12803.7	24123.3	22663.9	734.553	937.901	991.136	793.9	627.114	661.362	955.642	1007.95	1018.7	984.624	1497.96	1924.09	681.764	598.377	493.951	675.051	774.685	333.324	501.754	862.777
pgaptmp_000435	pgaptmp_000435	pgaptmp_000435	protein_coding	protein_coding	pgaptmp_000435	0.4486	399				TRUE	2.33956	8.2679e-07	7.79966e-05	Chromosome_I	468503	468901	399	-	7.7293	588.214	859.874	651.014	144.137	113.333	131.947	256.89	178.365	209.017	167.494	156.014	164.881	166.439	155.391	164.682	321.918	291.6	287.089	144.173	120.423	111.325	60.7464	89.0643	68.1018	19.4611	14.6868	16.1867	30.6554	19.4256
pgaptmp_003186	pgaptmp_003186	pgaptmp_003186	protein_coding	protein_coding	pgaptmp_003186	0.4679	1716				TRUE	1.41847	8.30894e-07	7.79966e-05	Chromosome_I	3456353	3458068	1716	-	10.4595	1894.93	1990.82	2057.6	1026.25	1220.72	1401.94	1263.66	1304.53	1203.43	1467.09	1692.58	1704.38	1969.29	1666.01	1617.83	1761.28	1882.75	1873.35	663.308	728.271	713.641	45.5023	47.9465	50.0477	32.2183	36.7826	39.9893	35.0628	33.035
pgaptmp_001097	pgaptmp_001097	pgaptmp_001097	protein_coding	protein_coding	pgaptmp_001097	0.4623	1404				TRUE	1.81692	8.4521e-07	7.79966e-05	Chromosome_I	1168889	1170292	1404	-	8.57111	1292.07	1104.55	1034.11	274.821	302.449	233.381	278.421	305.982	346.25	425.799	386.408	427.949	359.391	517.23	422.903	249.444	225.024	193.156	281.082	304.561	330.651	37.9207	32.5131	30.7425	10.545	11.1386	8.13639	9.4421	9.47036
pgaptmp_004064	pgaptmp_004064	pgaptmp_004064	protein_coding	protein_coding	pgaptmp_004064	0.4292	480		GO:0008199,GO:0016491		TRUE	2.02608	8.99981e-07	8.04612e-05	Chromosome_II	853845	854324	480	+	10.3008	6644.58	7422.03	9069.27	3074.28	2228.43	3142.81	10862.2	7707.76	8546.46	284.538	272.118	224.164	197.37	166.49	155.46	365.74	342.197	288.412	1902.19	1871.33	1602.58	570.407	639.032	788.628	345.038	240.05	320.487	1077.48	697.79
pgaptmp_003635	pgaptmp_003635	pgaptmp_003635	protein_coding	protein_coding	pgaptmp_003635	0.4896	1011				TRUE	2.33035	9.02512e-07	8.04612e-05	Chromosome_II	389278	390288	1011	+	5.96995	258.259	290.439	276.089	47.405	40.9638	36.2854	52.7145	54.4797	49.2632	48.4321	29.0259	46.3148	55.9707	62.1564	55.3331	48.8776	58.5863	52.9196	34.0874	45.8753	60.647	10.526	11.8726	11.3983	2.52602	2.09504	1.75677	2.48263	2.34165
pgaptmp_004725	pgaptmp_004725	pgaptmp_004725	protein_coding	protein_coding	pgaptmp_004725	0.442	681		GO:0015288,GO:0042834		TRUE	-2.77049	9.23655e-07	8.09737e-05	Chromosome_II	1643137	1643817	681	-	7.92458	72.4667	47.5263	57.995	397.818	458.794	263.069	359.349	521.662	476.445	252.25	362.824	487.231	213.572	207.558	242.412	111.239	181.085	177.281	352.609	386.117	556.624	4.3848	2.88422	3.55455	31.4703	34.8349	18.9084	25.1248	33.2874
pgaptmp_005045	pgaptmp_005045	pgaptmp_005045	protein_coding	protein_coding	pgaptmp_005045	0.4534	1632				TRUE	-1.79833	9.93312e-07	8.56528e-05	Chromosome_II	2005970	2007601	1632	+	8.64938	320.704	280.757	267.921	969.881	885.5	558.301	327.424	456.734	444.776	264.358	339.241	255.658	203.262	274.154	226.602	291.58	312.904	236.815	981.271	858.888	1107.43	8.09734	7.10972	6.85215	32.0157	28.0551	16.7448	9.55262	12.1613
pgaptmp_003820	pgaptmp_003820	pgaptmp_003820	protein_coding	protein_coding	pgaptmp_003820	0.464	1584				TRUE	-1.51692	1.01929e-06	8.64754e-05	Chromosome_II	582006	583589	1584	-	13.2261	4177.63	4310.81	4477.87	6634.14	8633.11	9286.59	6472.74	6144.27	5759.57	14424.7	16156.6	16308.4	17490.9	16045.2	19825	10731.2	11423	9735.88	11684.2	11937.1	11771.3	108.676	112.472	117.993	225.628	281.81	286.968	194.566	168.559
pgaptmp_000502	pgaptmp_000502	pgaptmp_000502	protein_coding	protein_coding	pgaptmp_000502	0.4792	432				TRUE	2.51011	1.04584e-06	8.73191e-05	Chromosome_I	517124	517555	432	+	7.64987	418.611	266.675	351.237	36.5147	38.9156	28.8634	39.3502	32.0908	25.3353	1015.06	1442.23	1343.13	1087.01	879.07	1030.25	441.584	527.276	549.04	57.5574	43.9639	54.8316	39.9287	25.5118	33.9358	4.55353	4.65783	3.27037	4.33707	3.22801
pgaptmp_005044	pgaptmp_005044	pgaptmp_005044	protein_coding	protein_coding	pgaptmp_005044	0.4478	498				TRUE	-2.2914	1.1377e-06	9.3505e-05	Chromosome_II	2005371	2005868	498	+	8.18556	186.563	183.064	169.901	638.046	558.473	560.775	279.164	253.741	274.466	258.304	330.17	203.785	92.7936	174.26	165.999	256.186	179.753	170.666	1086.89	697.687	815.827	15.4367	15.192	14.2399	69.0219	57.9851	55.1178	26.6909	22.1411
pgaptmp_000505	pgaptmp_000505	pgaptmp_000505	protein_coding	protein_coding	pgaptmp_000505	0.4762	483				TRUE	2.64297	1.26802e-06	0.000102612	Chromosome_I	518838	519320	483	+	8.41861	834.909	499.026	763.737	81.9979	71.6866	47.0061	71.2759	74.6298	81.6361	1438.84	1630.9	1771.08	1187.17	1068.87	1360.93	782.042	870.805	769.98	112.321	93.6621	96.3706	71.2279	42.699	65.999	9.14576	7.67423	4.76365	7.02633	6.71433
pgaptmp_000307	pgaptmp_000307	argB	protein_coding	protein_coding	pgaptmp_000307	0.4975	792	GO:0006592	GO:0003991	GO:0005737	TRUE	3.7203	1.37442e-06	0.000109537	Chromosome_I	323327	324118	792	+	11.251	14868.8	11207.4	10279	9217.08	9872.95	4787.2	10937.9	20318	18469.5	631.635	760.117	724.363	746.767	591.596	657.409	842.718	930.723	928.738	531.987	939.807	1162.26	773.586	584.819	541.71	626.949	644.563	295.862	657.568	1114.79
pgaptmp_004379	pgaptmp_004379	pgaptmp_004379	protein_coding	protein_coding	pgaptmp_004379	0.4247	372				TRUE	-2.51053	1.4267e-06	0.000110814	Chromosome_II	1244192	1244563	372	+	6.81617	51.6518	66.0088	62.896	84.5603	62.8111	93.1876	69.0485	62.689	59.1158	62.5581	92.5202	55.5777	106.05	124.313	154.142	261.243	213.041	230.2	451.519	347.251	274.989	5.72138	7.33331	7.05701	12.2458	8.73047	12.2616	8.8378	7.32295
pgaptmp_002077	pgaptmp_002077	pgaptmp_002077	protein_coding	protein_coding	pgaptmp_002077	0.4695	2439	GO:0006508	GO:0004222,GO:0008270	GO:0005576	TRUE	1.98402	1.43257e-06	0.000110814	Chromosome_I	2244346	2246784	2439	-	7.9866	1060.79	843.152	792.326	239.588	250.562	198.745	256.89	252.995	238.574	149.332	157.829	133.387	172.331	162.051	158.094	303.378	259.644	207.709	199.495	231.925	203.541	17.9216	14.2868	13.5592	5.29196	5.31186	3.98857	5.01497	4.50752
pgaptmp_004153	pgaptmp_004153	tssB	protein_coding	protein_coding	pgaptmp_004153	0.4556	507	GO:0033103	GO:0003674		TRUE	-3.34812	1.45885e-06	0.000110863	Chromosome_II	990643	991149	507	+	6.5587	65.5284	41.3655	38.391	101.857	98.313	61.0255	142.552	201.5	199.164	78.7021	61.6801	55.5777	61.8624	58.8266	25.0316	60.6757	62.5808	43.6586	379.432	544.77	702.01	5.32574	3.37188	3.16055	10.823	10.0264	5.89164	13.3874	17.2705
pgaptmp_000757	pgaptmp_000757	pgaptmp_000757	protein_coding	protein_coding	pgaptmp_000757	0.4626	975				TRUE	1.98874	1.5037e-06	0.000110863	Chromosome_I	795635	796609	975	+	9.7855	2793.82	2756.53	3078.64	963.475	751.002	717.462	3777.62	3332.97	3292.89	359.205	400.921	409.423	416.835	390.698	436.077	471.922	484.668	465.692	571.104	834.039	648.01	118.074	116.842	131.794	53.2354	39.8273	36.0186	184.479	148.547
pgaptmp_002468	pgaptmp_002468	pgaptmp_002468	protein_coding	protein_coding	pgaptmp_002468	0.4623	915			GO:0016020	TRUE	1.47615	1.50475e-06	0.000110863	Chromosome_I	2684116	2685030	915	+	9.76516	2413.76	2297.11	2423.54	1301.72	1211.16	742.202	1534.66	2065.01	1794.59	764.823	633.128	535.399	615.678	824.683	613.933	224.163	262.307	232.846	733.159	774.783	929.644	108.7	103.753	110.553	76.6407	68.4424	39.7039	79.859	98.0703
pgaptmp_004781	pgaptmp_004781	pgaptmp_004781	protein_coding	protein_coding	pgaptmp_004781	0.4676	633				TRUE	-1.40612	1.5211e-06	0.000110863	Chromosome_II	1706802	1707434	633	-	9.84136	335.351	403.094	397.797	780.261	734.617	1244.42	561.298	435.092	446.887	1612.38	1464	1398.71	1469.97	1399.63	1576.99	1623.07	1636.42	1479.1	993.564	914.321	994.445	21.83	26.3174	26.23	66.405	60.0069	96.2272	42.2204	29.8686
pgaptmp_004349	pgaptmp_004349	pgaptmp_004349	protein_coding	protein_coding	pgaptmp_004349	0.4246	2082	GO:0055085	GO:0022857	GO:0019867	TRUE	-1.57581	1.53859e-06	0.000110863	Chromosome_II	1212069	1214150	2082	-	10.5129	1024.56	1211.04	1320	4805.85	3970.07	3678.02	2001.66	1878.43	1848.07	938.372	1195.51	779.941	530.249	632.664	501.95	921.933	849.501	801.731	3631.71	3148.19	3343.9	20.2774	24.0392	26.4627	124.352	98.5965	86.4702	45.7766	39.206
pgaptmp_000503	pgaptmp_000503	pgaptmp_000503	protein_coding	protein_coding	pgaptmp_000503	0.5052	576				TRUE	2.67727	1.5727e-06	0.000111789	Chromosome_I	517552	518127	576	+	8.45478	787.112	456.781	672.252	64.7015	74.4175	61.0255	74.9882	59.7038	56.3008	1753.65	2343.85	2256.46	1796.95	1374.1	1724.55	660.691	920.071	812.315	101.703	82.8305	83.0781	56.3083	32.7738	48.7136	6.0514	6.68031	5.18587	6.19874	4.50419
pgaptmp_004790	pgaptmp_004790	pgaptmp_004790	protein_coding	protein_coding	pgaptmp_004790	0.4074	135				TRUE	-1.86526	1.66671e-06	0.000116892	Chromosome_II	1715107	1715241	135	-	10.3389	666.077	967.248	744.133	1707.22	1233.69	2549.88	2124.17	1033.62	1277.32	1999.84	1378.73	1932.25	836.615	811.363	720.647	1061.82	900.098	592.699	2901.34	2756.34	2631.92	203.305	296.105	230.069	681.272	472.516	924.523	749.184	332.71
pgaptmp_003311	pgaptmp_003311	pgaptmp_003311	protein_coding	protein_coding	pgaptmp_003311	0.4307	267				TRUE	-1.57181	1.76088e-06	0.000121871	Chromosome_II	48825	49091	267	+	10.5039	423.237	513.108	561.98	1143.49	782.408	1756.54	921.39	686.594	800.175	3287.33	2612.34	3249.44	1986.96	1654.92	1768.02	4801.81	3512.51	3232.06	1503.2	1407.48	1364.14	65.3176	79.4217	87.8517	230.719	151.519	322.018	164.31	111.745
pgaptmp_000983	pgaptmp_000983	pgaptmp_000983	protein_coding	protein_coding	pgaptmp_000983	0.4652	948				TRUE	-1.34465	1.79758e-06	0.000122795	Chromosome_I	1039617	1040564	948	-	9.72985	794.821	858.114	893.613	1544.51	1426.22	1167.73	683.061	664.205	593.973	736.571	823.611	629.881	425.672	602.695	578.362	542.71	525.945	523.904	2017.3	1894.27	2292.13	34.5477	37.4092	39.3443	87.7699	77.7898	60.293	34.3071	30.4461
pgaptmp_001158	pgaptmp_001158	pgaptmp_001158	protein_coding	protein_coding	pgaptmp_001158	0.4439	669				TRUE	1.72978	1.82192e-06	0.000122863	Chromosome_I	1230056	1230724	669	+	6.44924	471.805	426.857	477.029	271.618	221.204	150.914	511.553	461.212	522.19	14.126	18.1412	33.3466	16.2021	22.1987	18.4444	8.42718	18.6411	17.1989	111.203	115.325	156.187	29.0599	26.3692	29.7618	21.8724	17.0967	11.0417	36.408	29.9579
pgaptmp_004154	pgaptmp_004154	tssC	protein_coding	protein_coding	pgaptmp_004154	0.4573	1476	GO:0033103	GO:0003674	GO:0033104	TRUE	-3.41863	1.88726e-06	0.000125658	Chromosome_II	991158	992633	1476	+	7.48684	132.599	75.6901	73.5148	172.964	189.799	84.1162	260.603	367.179	350.472	159.422	99.7767	113.008	111.941	145.402	77.7298	129.779	111.846	78.0564	772.276	1005.43	1340.05	3.70178	2.11931	2.07888	6.31298	6.64892	2.7895	8.40669	10.8101
pgaptmp_004891	pgaptmp_004891	pgaptmp_004891	protein_coding	protein_coding	pgaptmp_004891	0.4382	744				TRUE	-1.49634	1.97932e-06	0.000129815	Chromosome_II	1827660	1828403	744	+	8.9503	602.091	622.243	704.925	1176.16	1069.15	1077.84	610.3	586.59	590.454	284.538	246.721	238.984	175.277	173.15	183.126	197.196	246.329	201.094	1891.57	1520.89	1813.6	33.3463	34.5644	39.5468	85.1641	74.3039	70.9112	39.0574	34.2609
pgaptmp_001178	pgaptmp_001178	pgaptmp_001178	protein_coding	protein_coding	pgaptmp_001178	0.4553	2550	GO:0000160			TRUE	1.41708	1.99906e-06	0.000129815	Chromosome_I	1254285	1256834	2550	-	10.8241	4250.1	4487.72	3790.1	3075.56	3046.34	2158.98	3127.97	3485.96	3484.31	1319.77	1329.75	807.73	1079.65	1287.53	808.917	1162.95	994.635	780.564	1441.17	1478.21	1544.42	68.6779	72.7322	62.037	64.9753	61.7706	41.4421	58.4057	59.4045
pgaptmp_000303	pgaptmp_000303	pgaptmp_000303	protein_coding	protein_coding	pgaptmp_000303	0.4685	540		GO:0003677		TRUE	-2.27139	2.03767e-06	0.000130709	Chromosome_I	317130	317669	540	-	12.7253	2176.31	2408.88	2967.55	4400.98	3883.36	5122.84	3932.8	3362.82	3265.44	8802.53	9950.46	12030.7	10974.7	13433.6	14451.2	10397.5	11349.8	11975.7	14249.1	10552.6	9882.15	166.068	184.358	229.374	439.056	371.842	464.355	346.769	270.612
pgaptmp_003925	pgaptmp_003925	pyrC	protein_coding	protein_coding	pgaptmp_003925	0.4791	1029	GO:0019856	GO:0004151		TRUE	-1.42825	2.26394e-06	0.000143474	Chromosome_II	696226	697254	1029	-	10.6231	825.658	836.111	913.217	1781.53	1803.77	1642.74	1397.3	1288.86	1389.93	1594.22	1801.42	1687.71	1430.2	1644.93	1720.59	2145.56	2155.71	1741.05	2343.65	2272.1	2012.15	33.0631	33.5807	37.0424	93.2701	90.6379	78.1423	64.6559	54.4285
pgaptmp_000498	pgaptmp_000498	pgaptmp_000498	protein_coding	protein_coding	pgaptmp_000498	0.5357	336				TRUE	3.22454	2.46923e-06	0.000154621	Chromosome_I	516096	516431	336	+	8.7734	1167.95	782.424	1110.07	81.3573	79.1966	103.084	112.111	95.5261	132.307	1743.56	2374.69	2065.64	1883.86	1175.42	1475.55	1014.63	1059.88	1128.51	138.585	70.0873	83.0781	143.233	96.2375	137.896	13.0443	12.1874	15.017	15.887	12.3544
pgaptmp_004004	pgaptmp_004004	pgaptmp_004004	protein_coding	protein_coding	pgaptmp_004004	0.3766	231				TRUE	-1.60999	2.50749e-06	0.000155169	Chromosome_II	773318	773548	231	-	10.8508	779.403	911.801	721.262	2160.13	1890.48	3169.2	2513.22	1113.48	1536.31	5490.99	3662.71	4185	1614.31	1396.3	1291.1	2010.72	1513.92	1415.6	2614.11	2179.72	2264.71	139.03	163.128	130.323	503.77	423.159	671.538	518.025	209.463
pgaptmp_004164	pgaptmp_004164	tssK	protein_coding	protein_coding	pgaptmp_004164	0.4517	1326	GO:0033103	GO:0003674		TRUE	-1.28046	2.60303e-06	0.000157828	Chromosome_II	1004415	1005740	1326	+	6.38885	65.5284	68.6491	68.6138	90.9664	94.2167	79.1682	118.051	96.2724	99.9338	60.5401	87.0778	72.251	45.6603	59.9366	60.6029	79.2155	69.2383	48.9506	163.731	166.935	169.479	2.03631	2.1396	2.15978	3.69574	3.67391	2.9224	4.23895	3.15497
pgaptmp_000504	pgaptmp_000504	pgaptmp_000504	protein_coding	protein_coding	pgaptmp_000504	0.4799	696				TRUE	2.51412	2.61047e-06	0.000157828	Chromosome_I	518130	518825	696	+	9.09359	1174.89	685.611	1015.32	118.513	120.16	103.908	132.157	123.885	125.973	2334.83	2927.99	2893.75	1985.49	1783.67	2318.72	1125.87	1404.74	1225.09	177.702	138.9	146.218	69.5576	40.7109	60.8885	9.17317	8.9268	7.30758	9.04097	7.73479
pgaptmp_004559	pgaptmp_004559	pgaptmp_004559	protein_coding	protein_coding	pgaptmp_004559	0.4745	1041				TRUE	-1.23025	2.64404e-06	0.000158041	Chromosome_II	1443304	1444344	1041	-	10.7185	875.768	906.52	928.737	1598.32	1820.16	2054.25	1187.93	1000.79	1069.71	2237.97	2556.1	2458.39	1771.92	1654.92	1878.69	2556.81	2529.86	2413.13	1880.96	2003.22	2214.03	34.6654	35.9889	37.2377	82.7136	90.407	96.5907	54.3342	41.7761
pgaptmp_003320	pgaptmp_003320	nagB	protein_coding	protein_coding	pgaptmp_003320	0.4682	801	GO:0006044	GO:0004342		TRUE	-1.62077	2.7009e-06	0.000159626	Chromosome_II	55586	56386	801	+	11.1713	1884.14	2075.32	2439.06	3695.03	3326.26	3472.68	4501.52	4047.92	4065.62	1305.65	1338.82	1374.62	1117.94	1233.14	1551.96	1090.48	1029.25	981.658	6781.72	6279.19	5677.56	96.9254	107.076	127.096	248.513	214.717	212.21	267.583	219.602
pgaptmp_004166	pgaptmp_004166	pgaptmp_004166	protein_coding	protein_coding	pgaptmp_004166	0.4657	1518				TRUE	-1.29385	2.79665e-06	0.000163449	Chromosome_II	1006678	1008195	1518	+	6.62481	81.7178	80.9708	92.3019	168.48	167.951	126.174	100.974	141.05	143.567	80.7201	45.353	50.02	67.754	78.8055	71.1425	60.6757	62.5808	55.5655	208.995	204.528	213.511	2.21821	2.20444	2.53793	5.97917	5.72079	4.06848	3.16717	4.03775
pgaptmp_001896	pgaptmp_001896	pgaptmp_001896	protein_coding	protein_coding	pgaptmp_001896	0.4621	1545	GO:0008150	GO:0003824	GO:0005575	TRUE	1.56267	2.86847e-06	0.000165804	Chromosome_I	2036880	2038424	1545	-	10.2934	2665.85	2517.13	2166.24	1531.7	1270.56	954.142	1441.85	1788.13	1750.25	837.471	979.626	794.762	879.329	951.215	1046.06	1339.92	1150.42	2230.56	716.395	752.483	898.075	71.0993	67.3317	58.5219	53.4082	42.5217	30.2285	44.435	50.293
pgaptmp_003570	pgaptmp_003570	pgaptmp_003570	protein_coding	protein_coding	pgaptmp_003570	0.4463	726				TRUE	-1.81938	2.92191e-06	0.000167057	Chromosome_II	323717	324442	726	-	7.87872	74.0086	83.6111	62.896	174.886	185.702	332.341	115.081	105.228	111.194	306.737	277.561	359.403	338.77	347.41	436.077	682.601	786.92	656.203	303.993	254.863	235.111	4.20053	4.75958	3.61599	12.9773	13.2259	22.4068	7.54743	6.29843
pgaptmp_005222	pgaptmp_005222	pgaptmp_005222	protein_coding	protein_coding	pgaptmp_005222	0.4435	717		GO:0015036		TRUE	-1.53159	2.96558e-06	0.000167731	Chromosome_II	2192381	2193097	717	+	9.42255	401.651	423.336	452.524	1259.44	1013.17	990.427	547.933	471.66	551.044	619.527	647.641	583.566	413.889	600.476	579.68	778.671	721.676	830.837	1370.2	1041.12	1144.82	23.0828	24.401	26.3429	94.6284	73.0646	67.6139	36.3866	28.5856
pgaptmp_001096	pgaptmp_001096	pgaptmp_001096	protein_coding	protein_coding	pgaptmp_001096	0.4751	3075	GO:0006260	GO:0003887,GO:0008408		TRUE	1.4567	3.07255e-06	0.000171932	Chromosome_I	1165787	1168861	3075	-	9.69035	1726.87	1761.99	1618.96	549.002	657.468	569.021	514.523	543.305	525.708	970.66	894.362	983.726	975.069	1048.89	944.614	898.337	898.766	895.664	618.044	617.405	521.731	23.1405	23.681	21.9751	9.61817	11.0554	9.05766	7.96695	7.67778
pgaptmp_004712	pgaptmp_004712	betI	protein_coding	protein_coding	pgaptmp_004712	0.4817	600		GO:0003677		TRUE	-1.48355	3.16968e-06	0.0001755	Chromosome_II	1629614	1630213	600	-	7.69486	148.017	125.857	157.648	309.414	333.855	266.368	345.243	324.64	318.803	161.44	145.13	101.893	110.469	118.763	97.4916	214.05	155.786	215.647	354.844	410.966	425.36	10.1653	8.66896	10.9668	27.7813	28.7707	21.7302	27.3972	23.5119
pgaptmp_003705	pgaptmp_003705	pgaptmp_003705	protein_coding	protein_coding	pgaptmp_003705	0.4598	261				TRUE	-1.39621	3.2293e-06	0.000176938	Chromosome_II	465093	465353	261	-	6.99272	89.427	110.895	102.104	221.651	162.49	189.674	262.087	115.676	151.308	78.7021	83.4496	81.514	35.3499	69.926	67.1901	134.835	133.151	142.883	283.876	247.217	260.865	14.1184	17.5595	16.3284	45.7502	32.1906	35.5713	47.8122	19.2593
pgaptmp_003646	pgaptmp_003646	pgaptmp_003646	protein_coding	protein_coding	pgaptmp_003646	0.4595	1086				TRUE	-1.18144	3.27808e-06	0.000177303	Chromosome_II	402313	403398	1086	-	9.21094	457.928	492.865	489.282	1163.99	1080.76	907.96	964.452	1020.94	1069.01	256.286	272.118	277.889	313.731	388.478	429.49	480.349	464.696	472.307	1014.24	1080.62	1043.46	17.375	18.756	18.8049	57.7407	51.4569	40.9232	42.2847	40.8513
pgaptmp_004724	pgaptmp_004724	pgaptmp_004724	protein_coding	protein_coding	pgaptmp_004724	0.4265	1395				TRUE	-2.35455	3.30336e-06	0.000177303	Chromosome_II	1641624	1643018	1395	-	8.12917	142.621	84.4912	110.272	622.672	635.621	372.75	527.887	653.757	601.011	209.872	232.208	294.562	151.71	176.48	230.554	144.947	133.151	168.02	538.134	501.443	708.657	4.21276	2.5031	3.29938	24.0463	23.5596	13.0791	18.0177	20.3648
pgaptmp_000507	pgaptmp_000507	pgaptmp_000507	protein_coding	protein_coding	pgaptmp_000507	0.4615	156				TRUE	2.54763	3.46966e-06	0.000184348	Chromosome_I	519611	519766	156	+	7.14499	405.505	293.959	407.599	56.3736	54.6184	56.9021	60.139	49.2557	49.2632	341.043	540.608	489.084	381.485	211.998	306.967	104.497	177.09	162.728	69.2925	53.5212	38.2159	107.11	77.876	109.056	19.4677	18.1033	17.854	18.3554	13.7205
pgaptmp_004855	pgaptmp_004855	pgaptmp_004855	protein_coding	protein_coding	pgaptmp_004855	0.4815	783		GO:0005524		TRUE	-1.57775	3.94896e-06	0.000207039	Chromosome_II	1778366	1779148	783	+	8.78995	293.722	246.433	305.495	759.762	791.966	548.405	315.544	429.121	378.623	429.835	569.634	452.032	306.366	327.431	281.935	391.021	375.485	379.698	697.954	813.013	946.26	15.4573	13.007	16.2848	52.2733	52.2984	34.2825	19.1881	23.8153
pgaptmp_003926	pgaptmp_003926	pgaptmp_003926	protein_coding	protein_coding	pgaptmp_003926	0.4	165			GO:0016020	TRUE	-1.30085	4.011e-06	0.000207039	Chromosome_II	697409	697573	165	-	7.65385	105.616	129.377	110.272	189.62	187.068	310.075	248.723	170.902	160.457	318.845	224.951	201.932	203.262	211.998	176.539	284.839	214.372	129.653	286.67	268.88	285.789	26.3758	32.4052	27.8948	61.9106	58.6218	91.9848	71.7737	45.0092
pgaptmp_005217	pgaptmp_005217	pgaptmp_005217	protein_coding	protein_coding	pgaptmp_005217	0.4907	375			GO:0016020	TRUE	-1.65917	4.01483e-06	0.000207039	Chromosome_II	2188606	2188980	375	-	7.01142	38.5461	45.7661	47.3762	116.591	108.554	162.46	113.596	91.7946	83.0436	139.242	206.81	133.387	182.641	168.71	206.84	301.693	271.627	187.864	172.114	136.352	132.094	4.23553	5.04376	5.27315	16.7493	14.9678	21.2054	14.4233	10.6371
pgaptmp_002636	pgaptmp_002636	recN	protein_coding	protein_coding	pgaptmp_002636	0.4589	1665	GO:0006281,GO:0006310	GO:0005524		TRUE	1.39917	4.09203e-06	0.000208972	Chromosome_I	2852624	2854288	1665	+	11.7945	10315.7	11071	9464.62	2873.77	2513.13	2111.15	3401.94	3135.94	3136.66	4179.29	3530.28	3992.33	1648.19	2343.08	2136.91	3313.57	2998.55	2657.88	3938.49	3499.91	3701.96	255.296	274.798	237.263	92.9827	78.0448	62.0637	97.2848	81.8449
pgaptmp_004847	pgaptmp_004847	hutZ	protein_coding	protein_coding	pgaptmp_004847	0.4294	531	GO:0042167	GO:0020037		TRUE	-1.40013	4.25733e-06	0.000215323	Chromosome_II	1771840	1772370	531	-	10.9522	969.05	994.532	1253.02	3005.74	2993.77	3678.02	1516.84	1700.81	1582.05	2518.47	2971.53	2676.99	1123.83	1164.32	1032.88	3423.12	2603.09	2189.55	2830.37	2617.44	2664.32	75.1986	77.4044	98.4927	304.944	291.519	339.041	136.012	139.187
pgaptmp_003725	pgaptmp_003725	fni	protein_coding	protein_coding	pgaptmp_003725	0.4863	1020	GO:0008299	GO:0004452,GO:0010181		TRUE	-1.35104	4.45006e-06	0.000222927	Chromosome_II	484548	485567	1020	+	8.78468	185.021	156.661	185.421	292.118	388.473	373.575	223.48	221.65	226.611	1091.74	1021.35	1163.43	798.319	802.484	814.186	566.306	637.791	612.544	401.785	435.816	481.022	7.47447	6.34749	7.5875	15.4284	19.6927	17.9271	10.4321	9.44291
pgaptmp_004161	pgaptmp_004161	pgaptmp_004161	protein_coding	protein_coding	pgaptmp_004161	0.47	600				TRUE	-1.45347	4.53542e-06	0.000223599	Chromosome_II	1001787	1002386	600	+	4.24311	10.7929	13.2018	11.4356	15.3746	12.2891	15.6687	22.2737	25.3741	30.9654	24.216	18.1412	20.3785	16.2021	24.4186	15.8094	10.1126	15.9781	2.64598	43.5872	42.6895	43.2006	0.741218	0.909331	0.795518	1.38044	1.05904	1.27825	1.76756	1.83771
pgaptmp_002262	pgaptmp_002262	pgaptmp_002262	protein_coding	protein_coding	pgaptmp_002262	0.4453	741				TRUE	1.26662	4.5485e-06	0.000223599	Chromosome_I	2452414	2453154	741	-	8.36033	549.668	549.193	537.475	451.629	495.662	411.51	503.386	579.127	481.372	248.214	283.003	264.921	201.789	202.008	258.221	254.501	271.627	247.399	219.612	219.819	195.234	30.5661	30.6301	30.2748	32.8343	34.5868	27.1828	32.3456	33.962
pgaptmp_001089	pgaptmp_001089	pgaptmp_001089	protein_coding	protein_coding	pgaptmp_001089	0.4504	1461				TRUE	1.38526	4.60094e-06	0.000224083	Chromosome_I	1157317	1158777	1461	-	9.27302	1424.67	1639.66	1830.52	479.816	484.738	626.748	577.632	535.842	517.263	496.429	515.211	455.737	653.974	456.184	519.077	436.528	548.58	459.077	624.75	597.016	544.993	40.181	46.3815	52.2955	17.6925	17.1554	20.9979	18.8249	15.9376
pgaptmp_004896	pgaptmp_004896	pgaptmp_004896	protein_coding	protein_coding	pgaptmp_004896	0.432	1176				TRUE	-1.16799	4.76318e-06	0.000228934	Chromosome_II	1831287	1832462	1176	+	8.14478	296.805	328.284	295.693	581.032	464.939	322.445	290.301	292.549	288.541	244.178	214.066	201.932	117.833	133.192	148.872	210.679	178.422	168.02	673.925	628.874	697.026	10.3997	11.5368	10.4948	26.6169	20.4424	13.4209	11.7537	10.8101
pgaptmp_003726	pgaptmp_003726	pgaptmp_003726	protein_coding	protein_coding	pgaptmp_003726	0.4735	264				TRUE	-1.70848	4.7876e-06	0.000228934	Chromosome_II	485729	485992	264	+	10.5533	267.51	362.608	360.222	871.868	740.761	1408.53	795.914	507.483	601.714	3622.32	4455.48	4322.09	3807.48	3498.52	3682.28	6913.66	4998.47	5022.07	1214.85	919.418	987.799	41.7537	56.7643	56.9518	177.914	145.084	261.154	143.547	83.5323
pgaptmp_003380	pgaptmp_003380	pgaptmp_003380	protein_coding	protein_coding	pgaptmp_003380	0.4286	210				TRUE	-1.5143	4.94459e-06	0.00023329	Chromosome_II	116380	116589	210	-	10.7913	889.645	757.781	820.915	1978.2	1706.82	1383.79	1092.15	1041.83	1154.87	2934.18	2819.14	2903.01	2075.34	2579.49	2472.86	2681.53	2228.94	2242.47	2064.24	2013.42	2714.99	174.564	149.13	163.162	507.475	420.255	322.541	247.627	215.584
pgaptmp_004727	pgaptmp_004727	tadF	protein_coding	protein_coding	pgaptmp_004727	0.4635	561				TRUE	-2.04205	4.96739e-06	0.00023329	Chromosome_II	1645378	1645938	561	-	7.29351	47.0263	33.4444	49.8267	177.449	292.208	155.862	184.872	323.893	266.021	173.548	277.561	289.004	225.356	154.281	271.395	70.7883	118.504	138.914	167.643	168.21	247.573	3.45411	2.46378	3.70715	17.0402	26.9323	13.5991	15.6906	25.0886
pgaptmp_004848	pgaptmp_004848	hutX	protein_coding	protein_coding	pgaptmp_004848	0.4722	504				TRUE	-1.60113	5.45074e-06	0.000252196	Chromosome_II	1772505	1773008	504	-	9.6065	504.954	454.14	628.96	1641.24	1532.04	1237	648.165	831.376	772.024	799.129	954.228	766.973	409.47	499.471	357.03	539.339	619.15	537.134	1398.7	1431.69	1815.26	41.2838	37.2393	52.0875	175.431	157.175	120.136	61.2333	71.681
pgaptmp_004043	pgaptmp_004043	pgaptmp_004043	protein_coding	protein_coding	pgaptmp_004043	0.4396	546				TRUE	-1.26791	5.46584e-06	0.000252196	Chromosome_II	812020	812565	546	-	9.89041	480.285	420.696	457.425	980.772	1103.97	522.015	455.126	497.781	582.713	1103.85	1150.15	1033.75	1951.61	2398.57	2658.62	1181.49	1356.8	1562.45	1113.71	1027.73	1007.74	36.2464	31.8432	34.9678	96.7697	104.547	46.7976	39.6892	39.6171
pgaptmp_003595	pgaptmp_003595	pgaptmp_003595	protein_coding	protein_coding	pgaptmp_003595	0.4399	666	GO:0000160,GO:0006355	GO:0000156,GO:0003677		TRUE	-1.32788	5.5214e-06	0.000252544	Chromosome_II	345716	346381	666	+	8.96157	245.924	265.795	229.529	532.346	529.798	619.326	392.017	329.864	348.361	728.499	714.764	618.765	483.116	608.245	533.569	746.648	633.797	702.507	648.22	528.203	631.394	15.2155	16.4936	14.3848	43.061	41.132	45.5175	28.0262	21.5227
pgaptmp_003424	pgaptmp_003424	pgaptmp_003424	protein_coding	protein_coding	pgaptmp_003424	0.4542	240				TRUE	-1.59882	5.7086e-06	0.000258856	Chromosome_II	173247	173486	240	+	9.57995	294.492	398.693	342.252	1044.83	490.882	1077.84	875.357	478.377	672.09	2058.36	723.835	1267.17	516.993	846.881	669.267	1213.51	850.832	982.981	1163.44	933.435	925.491	50.5616	68.6545	59.5218	234.531	105.757	219.825	173.663	86.6157
pgaptmp_004892	pgaptmp_004892	pgaptmp_004892	protein_coding	protein_coding	pgaptmp_004892	0.4308	1344				TRUE	-1.25776	5.85912e-06	0.00025996	Chromosome_II	1828406	1829749	1344	+	9.30833	768.61	789.465	853.588	1302.36	1189.31	773.539	590.254	644.055	649.57	371.313	520.653	333.466	243.031	306.342	274.03	358.998	394.126	381.021	1799.93	1619.02	2118.49	23.5649	24.2759	26.5088	52.203	45.7553	28.1719	20.9109	20.8239
pgaptmp_000805	pgaptmp_000805	pgaptmp_000805	protein_coding	protein_coding	pgaptmp_000805	0.465	1587				TRUE	-1.27781	5.86698e-06	0.00025996	Chromosome_I	850388	851974	1587	+	11.4985	1364.53	1336.9	1530.74	1941.04	2224.33	2681.82	1565.1	1406.77	1397.67	4205.52	3963.86	4096.08	5420.32	4869.29	5418.69	5066.42	4937.22	5765.59	3468.53	3313.86	3011.58	35.4295	34.8147	40.2593	65.8905	72.4714	82.7153	46.9567	38.5198
pgaptmp_003792	pgaptmp_003792	pgaptmp_003792	protein_coding	protein_coding	pgaptmp_003792	0.4468	1401				TRUE	1.42438	5.88122e-06	0.00025996	Chromosome_II	546292	547692	1401	+	9.18297	1524.89	1347.46	1264.45	568.22	606.264	481.606	710.532	834.361	765.69	304.719	373.709	316.793	437.455	410.676	420.268	503.945	451.38	784.533	436.431	532.664	489.33	44.8495	39.7483	37.6709	21.8495	22.3752	16.8262	24.1478	25.8793
pgaptmp_001897	pgaptmp_001897	pgaptmp_001897	protein_coding	protein_coding	pgaptmp_001897	0.4514	627				TRUE	1.48168	6.29031e-06	0.000275725	Chromosome_I	2038632	2039258	627	-	8.21266	624.447	839.631	825.816	694.42	728.472	513.769	671.924	600.77	687.573	203.818	132.431	138.944	159.075	186.469	135.698	106.182	86.5479	105.839	271.023	261.235	231.788	41.038	55.343	54.9739	59.6649	60.0744	40.1082	51.0253	41.6369
pgaptmp_001045	pgaptmp_001045	oppF	protein_coding	protein_coding	pgaptmp_001045	0.4562	993	GO:0015833	GO:0005524		TRUE	1.21496	6.42717e-06	0.000276206	Chromosome_I	1107418	1108410	993	+	9.71399	1429.29	1303.45	1257.1	588.079	660.199	462.639	530.115	807.494	776.95	1176.5	1329.75	1118.96	851.344	763.636	725.917	1378.69	1123.79	871.85	510.194	527.566	593.178	59.3102	54.2485	52.84	31.9044	34.3771	22.8048	25.4187	35.3368
pgaptmp_004669	pgaptmp_004669	vctD	protein_coding	protein_coding	pgaptmp_004669	0.4583	936				TRUE	-1.75652	6.43595e-06	0.000276206	Chromosome_II	1583661	1584596	936	-	7.55714	72.4667	103.854	102.104	372.194	420.561	504.697	191.554	160.454	146.382	161.44	156.014	181.554	162.021	144.292	114.618	188.769	139.808	195.802	364.903	302.65	274.158	3.19022	4.58552	4.5531	21.4219	23.2326	26.3929	9.74424	7.44924
pgaptmp_002235	pgaptmp_002235	pgaptmp_002235	protein_coding	protein_coding	pgaptmp_002235	0.4535	591				TRUE	1.49857	6.45882e-06	0.000276206	Chromosome_I	2421871	2422461	591	+	11.7216	10586.3	11034	13250.6	5459.27	4953.2	5478.27	4665.6	3841.94	4262.67	1454.98	1650.85	1350.54	1257.87	1371.88	1466.33	2430.4	2501.9	2419.75	4306.19	3863.08	3544.94	738.1	771.593	935.815	497.635	433.354	453.721	375.883	282.488
pgaptmp_005310	pgaptmp_005310	pgaptmp_005310	protein_coding	protein_coding	pgaptmp_005310	0.4221	462				TRUE	-1.14827	6.56722e-06	0.000278577	Chromosome_II	2296581	2297042	462	+	8.08604	194.273	207.708	186.237	374.756	359.798	388.419	409.094	361.208	360.325	238.124	235.836	200.08	194.425	269.715	223.967	178.656	183.748	175.958	431.401	423.072	413.729	17.3272	18.5803	16.8254	43.6989	40.2681	41.152	42.1613	33.9745
pgaptmp_003431	pgaptmp_003431	pgaptmp_003431	protein_coding	protein_coding	pgaptmp_003431	0.4562	708				TRUE	-1.7081	6.7381e-06	0.000283197	Chromosome_II	176620	177327	708	-	9.40606	236.673	249.073	324.282	817.417	664.296	853.532	467.748	417.18	453.925	1089.72	986.882	1172.69	826.305	879.07	973.598	861.258	924.065	825.545	931.537	911.135	716.134	13.7744	14.539	19.1175	62.1977	48.5146	59.0091	31.4566	25.6052
pgaptmp_003577	pgaptmp_003577	thiD	protein_coding	protein_coding	pgaptmp_003577	0.4845	873	GO:0009228	GO:0008902,GO:0008972		TRUE	-1.33506	6.78382e-06	0.000283197	Chromosome_II	329373	330245	873	-	6.52881	57.8192	51.9269	67.797	115.95	126.988	101.434	103.944	87.3168	101.341	82.7381	68.9366	64.8407	89.8477	122.093	98.809	70.7883	81.2219	63.5035	144.732	153.555	162.002	2.72908	2.45821	3.24143	7.15519	7.52127	5.68726	5.66915	4.34632
pgaptmp_003643	pgaptmp_003643	pgaptmp_003643	protein_coding	protein_coding	pgaptmp_003643	0.4756	1209	GO:1901642	GO:0005337,GO:0015293	GO:0005886	TRUE	-1.17319	7.45524e-06	0.000308776	Chromosome_II	398683	399891	1209	+	12.236	2423.01	2301.51	2573.02	3648.27	4571.56	4402.08	3035.91	3250.13	2971.98	8257.67	11225.8	10352.3	7451.47	6318.87	7925.8	4881.02	5199.53	5563.17	4919.76	5527.98	5264.66	82.5823	78.6733	88.8295	162.564	195.516	178.223	119.563	116.818
pgaptmp_000501	pgaptmp_000501	pgaptmp_000501	protein_coding	protein_coding	pgaptmp_000501	0.504	375				TRUE	2.55116	7.6774e-06	0.000315493	Chromosome_I	516746	517120	375	+	7.86406	486.452	296.599	477.846	42.2802	40.9638	37.9348	41.5776	45.5242	54.8932	1200.71	1442.23	1313.49	1218.1	773.626	907.726	529.227	611.161	629.743	68.7337	42.0524	78.0935	53.4524	32.6874	53.186	6.07393	5.64823	4.95152	5.27911	5.27531
pgaptmp_002261	pgaptmp_002261	pgaptmp_002261	protein_coding	protein_coding	pgaptmp_002261	0.4794	678				TRUE	1.2177	8.04789e-06	0.000328154	Chromosome_I	2451733	2452410	678	-	7.8617	409.36	431.257	400.247	274.18	322.248	212.765	259.86	338.073	282.911	213.908	199.553	220.458	203.262	243.076	270.078	128.093	141.14	134.945	165.967	143.998	187.757	24.8791	26.2874	24.6399	21.7857	24.5756	15.3604	18.2491	21.668
pgaptmp_003379	pgaptmp_003379	pgaptmp_003379	protein_coding	protein_coding	pgaptmp_003379	0.463	717	GO:0006355	GO:0003677		TRUE	-1.10966	8.14577e-06	0.000329307	Chromosome_II	115528	116244	717	-	12.4126	2745.26	2749.49	3088.44	5683.48	4851.48	4436.72	3938.74	4109.12	4119.1	9309.05	8174.43	9148.09	6019.8	7663	7305.28	7488.39	6391.23	6704.91	5839.57	5669.43	6173.54	157.769	158.48	179.788	427.031	349.863	302.883	261.559	249.039
pgaptmp_004670	pgaptmp_004670	pgaptmp_004670	protein_coding	protein_coding	pgaptmp_004670	0.4224	909				TRUE	-1.57758	8.22108e-06	0.000329307	Chromosome_II	1584619	1585527	909	-	8.38504	227.422	247.313	292.425	698.904	703.211	774.364	438.792	370.164	396.92	314.809	228.579	226.016	178.223	167.6	189.713	241.017	159.781	168.02	863.362	720.625	631.394	10.3093	11.2441	13.4274	41.4207	40.0005	41.6979	22.9841	17.6957
pgaptmp_004127	pgaptmp_004127	pgaptmp_004127	protein_coding	protein_coding	pgaptmp_004127	0.4753	1233	GO:0055085	GO:0022857		TRUE	-1.28407	8.38953e-06	0.000329307	Chromosome_II	941095	942327	1233	-	10.1492	622.135	656.567	575.866	1379.23	1648.11	2008.89	1112.2	981.382	995.82	1993.79	1975.58	2202.73	1172.44	1279.76	1501.9	588.217	605.835	583.438	1616.08	1361.61	1355	20.7912	22.0068	19.4939	60.2612	69.1141	79.7492	42.949	34.587
pgaptmp_004418	pgaptmp_004418	pgaptmp_004418	protein_coding	protein_coding	pgaptmp_004418	0.4457	2172	GO:0015891,GO:0055085	GO:0015267		TRUE	-1.34121	8.47085e-06	0.000329307	Chromosome_II	1286460	1288631	2172	-	9.37075	383.92	339.725	336.534	934.007	964.697	679.527	523.432	613.457	608.752	889.94	966.927	713.248	553.816	589.376	472.966	900.023	782.925	744.843	780.658	806.004	1018.54	7.28347	6.46412	6.46711	23.1662	22.9654	15.3137	11.4745	12.2733
pgaptmp_001636	pgaptmp_001636	pgaptmp_001636	protein_coding	protein_coding	pgaptmp_001636	0.435	1092				TRUE	1.5635	8.48257e-06	0.000329307	Chromosome_I	1711538	1712629	1092	+	10.1347	3759.02	3499.34	3473.98	2585.5	2718.63	1629.55	2659.48	3237.44	3409.01	647.779	614.987	266.773	462.495	487.262	317.506	482.035	456.707	301.642	890.185	1261.57	1305.99	141.844	132.436	132.784	127.551	128.727	73.0427	115.96	128.83
pgaptmp_000270	pgaptmp_000270	pgaptmp_000270	protein_coding	protein_coding	pgaptmp_000270	0.4901	1212		GO:0030170		TRUE	1.07676	8.51394e-06	0.000329307	Chromosome_I	285022	286233	1212	+	10.4077	2449.22	2360.47	2306.73	2022.4	2312.4	1477.81	2438.23	3619.54	3221.81	589.257	821.797	735.479	768.861	781.395	802.329	1031.49	1018.6	1059.71	1028.77	1099.1	1079.19	83.2691	80.4893	79.4392	89.8936	98.6518	59.6826	95.7866	129.774
pgaptmp_004117	pgaptmp_004117	pgaptmp_004117	protein_coding	protein_coding	pgaptmp_004117	0.4953	426				TRUE	-1.45491	8.51441e-06	0.000329307	Chromosome_II	930985	931410	426	+	7.74544	115.638	93.2924	98.8365	251.759	200.722	257.297	164.083	147.021	142.863	288.575	275.746	292.709	306.366	257.505	266.126	205.623	286.274	275.182	298.963	292.455	250.065	11.1854	9.05062	9.68387	31.8376	24.363	29.5636	18.3395	14.9971
pgaptmp_004890	pgaptmp_004890	pgaptmp_004890	protein_coding	protein_coding	pgaptmp_004890	0.4154	2340				TRUE	-1.1338	8.89201e-06	0.000339529	Chromosome_II	1824801	1827140	2340	-	11.0638	3153.07	2970.39	3187.27	3862.87	3795.29	2789.03	1554.71	1861.27	1824.85	1598.26	2289.42	1495.04	830.723	840.222	725.917	1250.59	1351.48	1041.19	6598.43	6002.66	6926.23	55.5235	52.4614	56.8518	88.9321	83.8636	58.3405	31.6348	34.5645
pgaptmp_003530	pgaptmp_003530	pgaptmp_003530	protein_coding	protein_coding	pgaptmp_003530	0.4832	921				TRUE	-1.19933	8.9568e-06	0.000339529	Chromosome_II	283158	284078	921	-	7.2926	124.119	117.056	122.525	297.242	256.024	228.433	206.403	172.395	192.83	84.7561	94.3343	146.355	97.2123	113.214	117.253	116.295	115.841	123.038	271.582	295.641	255.881	5.5531	5.2526	5.55271	17.3866	14.3736	12.1404	10.6706	8.13396
pgaptmp_004802	pgaptmp_004802	pgaptmp_004802	protein_coding	protein_coding	pgaptmp_004802	0.4611	1158	GO:0006865			TRUE	-1.26438	8.97233e-06	0.000339529	Chromosome_II	1728298	1729455	1158	-	11.2457	1186.45	1185.52	1340.42	2014.07	2193.61	2466.58	1503.48	1488.12	1474.38	3985.56	4103.54	4388.79	3312.58	3098.94	3770.55	2919.17	3075.78	3197.66	2947.72	3027.13	2534.71	42.2181	42.3098	48.314	93.6981	97.9478	104.261	61.8188	55.8427
pgaptmp_000764	pgaptmp_000764	pgaptmp_000764	protein_coding	protein_coding	pgaptmp_000764	0.4086	186				TRUE	1.58727	1.00539e-05	0.000377738	Chromosome_I	810791	810976	186	-	8.04631	696.914	595.839	806.212	838.557	518.192	437.074	645.938	634.353	846.623	155.386	97.9626	116.713	73.6457	78.8055	90.9043	168.544	145.134	130.976	253.141	205.165	191.08	154.392	132.391	180.916	242.875	144.053	115.02	165.352	148.203
pgaptmp_001802	pgaptmp_001802	tssC	protein_coding	protein_coding	pgaptmp_001802	0.4895	1479	GO:0033103	GO:0003674	GO:0033104	TRUE	1.51706	1.02383e-05	0.000381941	Chromosome_I	1924964	1926442	1479	+	6.60819	236.673	252.594	256.485	115.31	140.642	151.739	212.343	180.604	193.534	42.3781	39.9107	81.514	53.0249	52.167	44.7934	62.3611	49.2657	68.7954	67.616	96.2108	69.7856	6.59385	7.05823	7.23827	4.20012	4.9169	5.02183	6.836	5.30636
pgaptmp_004162	pgaptmp_004162	pgaptmp_004162	protein_coding	protein_coding	pgaptmp_004162	0.4521	1515		GO:0005515		TRUE	-1.80812	1.03992e-05	0.000384413	Chromosome_II	1002396	1003910	1515	+	5.31409	20.8149	21.1228	26.1386	39.0771	38.2328	26.3894	42.3201	32.8371	53.4857	40.3601	56.2378	33.3466	47.1332	45.5074	26.3491	33.7087	15.9781	35.7207	77.6746	80.2818	125.448	0.566135	0.57621	0.720129	1.38955	1.30487	0.852608	1.33005	0.941867
pgaptmp_003871	pgaptmp_003871	pgaptmp_003871	protein_coding	protein_coding	pgaptmp_003871	0.4813	534	GO:0022904	GO:0009055,GO:0020037,GO:0046872	GO:0016020	TRUE	-1.15985	1.04508e-05	0.000384413	Chromosome_II	637820	638353	534	-	7.42672	82.4887	90.652	84.9504	172.324	206.184	250.699	149.976	105.228	140.752	215.926	197.739	188.964	178.223	186.469	180.491	310.12	246.329	239.461	207.319	184.138	183.603	6.36519	7.01581	6.63996	17.3847	19.9645	22.9797	13.3726	8.56303
pgaptmp_000204	pgaptmp_000204	pgaptmp_000204	protein_coding	protein_coding	pgaptmp_000204	0.4529	510				TRUE	-1.8022	1.05267e-05	0.000384517	Chromosome_I	222218	222727	510	+	8.62151	281.387	354.687	445.99	338.241	330.441	534.385	498.931	405.24	365.251	201.8	261.234	214.901	312.258	235.307	301.697	320.233	387.468	283.12	1427.2	1144.97	1057.58	22.7348	28.742	36.5002	35.729	33.5018	51.2882	46.5804	34.5286
pgaptmp_000747	pgaptmp_000747	pgaptmp_000747	protein_coding	protein_coding	pgaptmp_000747	0.4394	792				TRUE	1.10718	1.11832e-05	0.000402276	Chromosome_I	783442	784233	792	-	10.5187	2338.21	2737.16	2770.69	2177.43	2156.06	1919.83	2371.41	2238.89	2381.52	990.84	968.741	954.084	873.438	955.655	1001.26	1109.02	1099.82	1072.94	1086.33	1223.98	1143.99	121.651	142.829	146.017	148.11	140.76	118.651	142.565	122.842
pgaptmp_003680	pgaptmp_003680	pgaptmp_003680	protein_coding	protein_coding	pgaptmp_003680	0.4752	444	GO:0008643,GO:0009401,GO:0016310	GO:0016301	GO:1902495	TRUE	1.29979	1.11913e-05	0.000402276	Chromosome_II	436563	437006	444	-	8.5705	2049.88	2082.36	1739.03	893.008	747.589	952.492	1253.27	1320.2	1294.21	46.4141	145.13	68.5459	73.6457	61.0465	52.6982	106.182	133.151	201.094	653.249	797.721	814.997	190.241	193.827	163.48	108.352	87.061	105.005	134.398	129.21
pgaptmp_005100	pgaptmp_005100	ulaR	protein_coding	protein_coding	pgaptmp_005100	0.4337	777	GO:0006355	GO:0003700		TRUE	-1.07192	1.12423e-05	0.000402276	Chromosome_II	2063083	2063859	777	+	9.12444	390.858	421.576	411.683	671.998	543.453	769.416	794.429	582.112	572.156	694.193	653.084	565.04	275.435	412.896	355.713	574.734	545.917	504.059	882.361	800.907	790.073	20.7279	22.4231	22.1148	46.592	36.1647	48.47	48.6818	32.5554
pgaptmp_003847	pgaptmp_003847	pgaptmp_003847	protein_coding	protein_coding	pgaptmp_003847	0.4444	522				TRUE	-1.35446	1.16671e-05	0.000414657	Chromosome_II	613881	614402	522	-	9.25584	342.29	405.734	441.089	898.133	630.842	936.824	854.568	604.501	641.829	546.879	642.199	733.626	315.204	409.567	457.156	608.442	624.476	553.009	1088.56	820.021	1019.37	27.0198	32.1227	35.2693	92.6903	62.4876	87.8456	77.9487	50.3227
pgaptmp_003366	pgaptmp_003366	pgaptmp_003366	protein_coding	protein_coding	pgaptmp_003366	0.4869	495				TRUE	-1.32692	1.18868e-05	0.000419627	Chromosome_II	102903	103397	495	+	10.2868	637.553	790.345	860.123	1474.04	1282.85	1951.17	1686.86	1270.2	1309.7	1291.52	1353.33	1311.63	777.698	985.623	1002.58	1252.28	1368.79	1280.65	2035.75	1703.76	1746.3	53.0725	65.9862	72.5264	160.424	134.003	192.94	162.258	111.507
pgaptmp_002469	pgaptmp_002469	pgaptmp_002469	protein_coding	protein_coding	pgaptmp_002469	0.4567	462			GO:0016020	TRUE	1.15147	1.21165e-05	0.000422802	Chromosome_I	2685040	2685501	462	+	9.12987	1141.74	1153.83	971.212	603.453	647.91	475.009	778.838	921.678	846.623	474.231	511.582	400.16	434.51	503.911	372.839	416.303	378.148	277.828	469.401	460.665	461.084	101.832	103.215	87.7431	70.3665	72.5131	50.326	80.2671	86.6911
pgaptmp_000968	pgaptmp_000968	aqpZ	protein_coding	protein_coding	pgaptmp_000968	0.4635	699	GO:0006833	GO:0015250		TRUE	-1.24909	1.2181e-05	0.000422802	Chromosome_I	1025925	1026623	699	-	8.39141	298.347	330.924	317.747	483.659	396.666	630.871	495.961	377.627	374.4	326.917	306.587	311.235	263.652	218.657	208.158	161.802	145.134	119.069	773.393	765.226	629.732	17.5874	19.5656	18.9734	37.2758	29.3421	44.177	33.7834	23.4759
pgaptmp_001258	pgaptmp_001258	pgaptmp_001258	protein_coding	protein_coding	pgaptmp_001258	0.4417	1716				TRUE	1.01017	1.22593e-05	0.000422802	Chromosome_I	1342742	1344457	1716	-	9.41612	1250.44	1394.99	1342.05	900.696	796.745	738.903	729.836	631.368	658.015	415.709	451.716	481.674	377.066	492.812	463.744	889.91	659.095	773.949	650.455	606.574	617.271	30.0264	33.5965	32.6432	28.2765	24.0075	21.0767	20.2507	15.9883
pgaptmp_004030	pgaptmp_004030	pgaptmp_004030	protein_coding	protein_coding	pgaptmp_004030	0.4554	1770			GO:0098561	TRUE	-1.18598	1.23608e-05	0.000422802	Chromosome_II	800173	801942	1770	-	10.4185	1093.94	1040.3	1110.07	1292.75	1233.01	913.733	1187.93	1282.14	1257.62	1676.96	1819.56	2274.98	790.955	1262	1331.95	1076.99	1043.9	1518.79	2373.27	2014.69	2694.22	25.467	24.2899	26.177	39.3464	36.0194	25.2685	31.9559	31.4774
pgaptmp_000800	pgaptmp_000800	pgaptmp_000800	protein_coding	protein_coding	pgaptmp_000800	0.4604	669				TRUE	-1.19234	1.23786e-05	0.000422802	Chromosome_I	846285	846953	669	-	8.45316	249.779	284.278	272.005	253.681	223.935	230.083	292.528	262.697	259.687	302.701	341.055	324.203	481.643	478.383	495.363	396.077	424.75	384.99	668.337	546.681	564.931	15.3847	17.5614	16.9704	20.428	17.3077	16.8341	20.8197	17.0634
pgaptmp_005176	pgaptmp_005176	pgaptmp_005176	protein_coding	protein_coding	pgaptmp_005176	0.4658	219		GO:0003677		TRUE	-1.14158	1.25705e-05	0.000426586	Chromosome_II	2144324	2144542	219	-	8.48638	165.748	183.064	210.742	322.226	319.517	458.516	354.152	324.64	308.247	375.349	386.408	526.136	362.337	337.421	328.046	615.184	541.923	597.991	391.167	372.1	439.483	31.1863	34.5463	40.1651	79.2649	75.4387	102.481	76.9978	64.4162
pgaptmp_004851	pgaptmp_004851	pgaptmp_004851	protein_coding	protein_coding	pgaptmp_004851	0.4535	699	GO:0015031		GO:0005886	TRUE	-1.4896	1.27e-05	0.000428147	Chromosome_II	1775315	1776013	699	+	8.42875	262.885	238.512	306.312	479.175	591.244	477.483	364.547	470.168	363.14	332.971	350.125	277.889	190.006	218.657	198.936	257.872	195.731	214.324	667.219	630.149	912.198	15.497	14.1018	18.2906	36.9302	43.7354	33.4359	24.8318	29.2289
pgaptmp_004419	pgaptmp_004419	pgaptmp_004419	protein_coding	protein_coding	pgaptmp_004419	0.4399	741	GO:0033214	GO:0008199,GO:0016491,GO:0051537		TRUE	-1.15737	1.27793e-05	0.000428147	Chromosome_II	1288720	1289460	741	-	7.55065	127.973	117.056	115.99	232.541	217.108	216.063	161.856	138.811	166.791	244.178	192.297	168.586	120.779	207.558	162.047	229.219	211.709	234.169	259.847	239.571	297.42	7.11638	6.52853	6.53346	16.9062	15.1496	14.2723	10.4002	8.14037
pgaptmp_004789	pgaptmp_004789	pgaptmp_004789	protein_coding	protein_coding	pgaptmp_004789	0.4553	615		GO:0015035		TRUE	-1.38708	1.29458e-05	0.000429801	Chromosome_II	1714425	1715039	615	+	10.2488	892.729	1043.82	1119.88	1986.53	2115.78	2293.4	1837.58	1536.63	1712.25	845.543	912.503	917.033	767.388	766.966	847.123	547.767	637.791	625.774	2665.52	2795.85	2159.2	59.814	70.1442	76.0038	174.014	177.885	182.532	142.267	108.575
pgaptmp_003784	pgaptmp_003784	pgaptmp_003784	protein_coding	protein_coding	pgaptmp_003784	0.4625	1440				TRUE	-1.08903	1.29921e-05	0.000429801	Chromosome_II	538414	539853	1440	+	8.08928	111.784	103.854	103.738	224.213	230.08	192.148	224.222	244.039	263.206	429.835	527.909	350.14	309.312	359.619	345.173	488.776	458.038	949.906	208.436	224.917	240.096	3.19871	2.98058	3.00687	8.38808	8.26152	6.53139	7.41393	7.36436
pgaptmp_004989	pgaptmp_004989	pgaptmp_004989	protein_coding	protein_coding	pgaptmp_004989	0.4215	726				TRUE	-1.27408	1.31264e-05	0.000431328	Chromosome_II	1941705	1942430	726	-	9.60156	512.664	669.769	649.381	1182.56	1088.95	1580.07	1521.3	1241.09	1185.13	548.897	771.002	435.359	674.594	512.791	386.014	414.617	505.972	329.424	1529.46	1406.21	1301.83	29.0974	38.1268	37.3339	87.751	77.5562	106.53	99.7722	74.2857
pgaptmp_000285	pgaptmp_000285	pgaptmp_000285	protein_coding	protein_coding	pgaptmp_000285	0.4167	228				TRUE	-1.50836	1.32022e-05	0.000431328	Chromosome_I	300356	300583	228	-	10.0555	587.443	699.693	646.93	1146.69	969.476	1294.73	665.984	417.927	526.412	1600.28	1429.53	1409.82	723.201	997.833	974.916	2455.68	1584.49	1397.08	2137.45	1623.48	1504.55	106.167	126.828	118.43	270.941	219.86	277.957	139.079	79.6531
pgaptmp_005313	pgaptmp_005313	pgaptmp_005313	protein_coding	protein_coding	pgaptmp_005313	0.4612	798		GO:0016787		TRUE	-0.968224	1.33775e-05	0.000432644	Chromosome_II	2298639	2299436	798	-	10.0716	785.57	822.029	867.474	1613.69	1444.66	1481.1	1103.29	941.828	1147.13	992.858	883.477	926.295	849.871	902.378	939.345	984.294	979.988	953.875	1473.58	1566.77	1595.1	40.564	42.5722	45.3727	108.939	93.6063	90.8481	65.8294	51.2869
pgaptmp_005214	pgaptmp_005214	pgaptmp_005214	protein_coding	protein_coding	pgaptmp_005214	0.4766	1305				TRUE	-1.08126	1.34124e-05	0.000432644	Chromosome_II	2185680	2186984	1305	+	12.1135	1924.22	1672.22	1858.29	2803.94	3105.74	3177.45	3109.41	3379.98	3330.89	6826.91	7443.34	7647.5	6109.65	6864.96	7881.01	9681.14	9024.95	11607.9	3562.97	3613.96	3867.29	60.758	52.9572	59.4352	115.751	123.055	119.179	113.449	112.549
pgaptmp_003942	pgaptmp_003942	pgaptmp_003942	protein_coding	protein_coding	pgaptmp_003942	0.4744	156				TRUE	-1.31714	1.3508e-05	0.000432644	Chromosome_II	711570	711725	156	-	6.58601	44.7135	51.0468	48.193	69.1857	79.1966	82.4669	32.6681	26.8667	30.2617	298.665	241.278	229.721	95.7394	122.093	108.031	198.881	190.405	164.051	120.703	105.768	148.71	11.8106	13.5234	12.8944	23.8922	26.2498	25.8754	9.97085	7.48389
pgaptmp_001047	pgaptmp_001047	pgaptmp_001047	protein_coding	protein_coding	pgaptmp_001047	0.4737	1275				TRUE	1.08659	1.35715e-05	0.000432644	Chromosome_I	1109675	1110949	1275	+	8.15849	494.932	535.991	574.232	257.525	268.995	374.4	536.054	469.421	470.815	147.314	170.527	163.028	197.37	178.7	192.348	306.749	248.992	267.244	227.995	253.589	225.973	15.9954	17.3736	18.7983	10.8811	10.9088	14.3733	20.0185	15.9989
pgaptmp_004360	pgaptmp_004360	pgaptmp_004360	protein_coding	protein_coding	pgaptmp_004360	0.3937	315				TRUE	-1.53842	1.37075e-05	0.000434347	Chromosome_II	1224227	1224541	315	+	5.25107	24.6695	17.6023	26.1386	23.7025	32.0883	53.6035	37.8653	38.0612	30.2617	58.5221	19.9553	38.9044	17.675	25.5285	21.0793	67.4174	57.2548	55.5655	82.1451	79.0075	68.9549	3.22707	2.30941	3.46348	4.05367	5.2672	8.32943	5.72353	5.2506
pgaptmp_003817	pgaptmp_003817	pgaptmp_003817	protein_coding	protein_coding	pgaptmp_003817	0.3068	1812				TRUE	-1.8032	1.40288e-05	0.000441865	Chromosome_II	577302	579113	1812	+	11.7054	1487.11	1774.32	1717.8	3747.56	3674.45	5585.48	3410.11	2521.74	2912.16	3812.01	4680.43	3921.94	2839.78	2162.16	2064.45	5656.32	4291.44	3335.26	7105.83	5034.18	4400.65	33.8176	40.4682	39.5689	111.418	104.852	150.881	89.6071	60.4755
pgaptmp_000089	pgaptmp_000089	pgaptmp_000089	protein_coding	protein_coding	pgaptmp_000089	0.4848	495				TRUE	1.09544	1.41197e-05	0.000442081	Chromosome_I	96536	97030	495	+	7.68432	322.246	357.327	347.153	149.902	114.016	146.791	178.932	190.306	174.532	123.098	114.29	194.522	371.174	245.296	313.554	256.186	287.605	302.964	144.732	161.201	139.571	26.825	29.8334	29.2723	16.3143	11.9098	14.5153	17.2114	16.7065
pgaptmp_002503	pgaptmp_002503	pgaptmp_002503	protein_coding	protein_coding	pgaptmp_002503	0.4479	960				TRUE	-1.24769	1.45264e-05	0.000452123	Chromosome_I	2719935	2720894	960	-	12.9792	9558.67	9837.07	9890.19	13964	11343.5	11627.8	10577.8	10226.5	10129.9	5704.9	5279.09	5318.79	3900.28	5033.56	3914.16	3967.52	4187.59	2720.07	23971.8	19631.5	22737.7	410.284	423.483	430.006	783.614	610.972	592.871	524.634	462.907
pgaptmp_004318	pgaptmp_004318	pgaptmp_004318	protein_coding	protein_coding	pgaptmp_004318	0.4167	192				TRUE	-1.71028	1.53322e-05	0.000474397	Chromosome_II	1176725	1176916	192	+	10.8951	996.803	1385.3	941.806	1185.13	961.966	2120.22	2851.78	1206.76	1633.43	4019.86	2322.08	2960.44	1548.03	1669.34	1375.42	3133.22	1703	1969.93	3688.15	3781.53	2908.57	213.927	298.185	204.739	332.527	259.061	540.522	707.208	273.123
pgaptmp_001582	pgaptmp_001582	pgaptmp_001582	protein_coding	protein_coding	pgaptmp_001582	0.462	987				TRUE	1.13552	1.56617e-05	0.000481758	Chromosome_I	1648613	1649599	987	-	7.87663	524.227	575.596	606.905	447.145	399.397	366.153	522.69	561.216	488.409	98.8822	83.4496	111.155	120.779	110.994	115.936	131.464	119.836	101.87	210.671	263.783	254.219	21.8857	24.1014	25.6652	24.4059	20.9234	18.1584	25.215	24.7087
pgaptmp_004668	pgaptmp_004668	vctG	protein_coding	protein_coding	pgaptmp_004668	0.4238	951				TRUE	-1.36045	1.63548e-05	0.000500153	Chromosome_II	1582718	1583668	951	-	7.24279	77.0923	100.333	98.0197	308.773	302.449	342.237	123.248	117.169	135.122	125.116	148.758	105.598	138.454	114.323	98.809	138.206	122.499	168.02	253.141	247.854	202.711	3.34032	4.3602	4.30203	17.4914	16.4443	17.6149	6.17066	5.35388
pgaptmp_003065	pgaptmp_003065	pgaptmp_003065	protein_coding	protein_coding	pgaptmp_003065	0.463	1674			GO:0098561	TRUE	1.34882	1.68665e-05	0.000510542	Chromosome_I	3315022	3316695	1674	-	10.9745	7787.86	7177.35	6778.88	3803.29	3798.71	2483.08	5417.71	6633.84	5897.5	593.293	740.162	759.562	721.728	710.359	766.758	659.005	644.449	748.812	2232.45	2786.93	3136.2	191.7	177.195	169.022	122.396	117.334	72.6052	154.097	172.206
pgaptmp_004660	pgaptmp_004660	pgaptmp_004660	protein_coding	protein_coding	pgaptmp_004660	0.4356	264				TRUE	1.05445	1.68887e-05	0.000510542	Chromosome_II	1575391	1575654	264	-	8.06012	972.905	1136.23	972.846	707.872	608.312	696.845	2300.13	1509.76	1626.39	62.5581	54.4236	68.5459	32.4041	46.6173	47.4283	69.1029	45.2712	76.7334	468.283	479.779	453.607	151.853	177.871	153.809	144.449	119.142	129.201	414.841	248.509
pgaptmp_003392	pgaptmp_003392	pgaptmp_003392	protein_coding	protein_coding	pgaptmp_003392	0.4497	825	GO:0006810	GO:0015291		TRUE	-1.33367	1.71088e-05	0.000511985	Chromosome_II	131539	132363	825	-	5.84358	19.2731	29.0439	25.3218	69.8263	60.7629	41.2334	67.5636	88.8094	59.8196	46.4141	45.353	68.5459	86.9019	75.4757	79.0472	55.6194	66.5753	70.1184	66.4984	70.0873	72.278	0.962621	1.45493	1.28109	4.55963	3.80828	2.4464	3.89935	4.67781
pgaptmp_005118	pgaptmp_005118	pgaptmp_005118	protein_coding	protein_coding	pgaptmp_005118	0.4491	432				TRUE	1.11696	1.71557e-05	0.000511985	Chromosome_II	2087333	2087764	432	+	6.91858	343.832	385.491	417.401	138.371	131.767	154.213	207.146	144.035	168.199	42.3781	58.0519	48.1674	69.2269	63.2664	88.2694	60.6757	70.5698	66.1495	179.937	151.643	159.51	32.7959	36.8784	40.3283	17.2555	15.7712	17.4731	22.831	14.4885
pgaptmp_000591	pgaptmp_000591	oadA	protein_coding	protein_coding	pgaptmp_000591	0.4822	1794	GO:0006814	GO:0008948,GO:0015081		TRUE	1.03099	1.72284e-05	0.000511985	Chromosome_I	594118	595911	1794	+	9.62717	1017.62	964.608	1016.14	719.403	678.633	686.949	742.457	855.257	807.916	647.779	751.046	737.331	1179.8	1073.31	1136.96	876.426	1011.94	908.893	443.695	495.708	447.791	23.3733	22.2213	23.6413	21.603	19.5594	18.7428	19.7052	20.7163
pgaptmp_003989	pgaptmp_003989	pgaptmp_003989	protein_coding	protein_coding	pgaptmp_003989	0.4099	222				TRUE	-1.47987	1.7415e-05	0.000514624	Chromosome_II	756276	756497	222	-	6.89133	40.088	66.0088	60.4455	119.794	111.968	149.265	138.097	105.974	104.156	100.9	63.4943	72.251	116.36	140.962	148.872	291.58	219.698	209.032	155.349	152.281	171.972	7.4408	12.2883	11.3645	29.07	26.0785	32.9108	29.6186	20.7436
pgaptmp_003932	pgaptmp_003932	pgaptmp_003932	protein_coding	protein_coding	pgaptmp_003932	0.4372	1107		GO:0016746		TRUE	-1.02528	1.75837e-05	0.000516704	Chromosome_II	702720	703826	1107	+	11.2303	2440.74	2735.4	2423.54	4115.91	3854.01	3806.67	3306.16	3108.33	3285.85	1091.74	1122.94	1198.63	1325.62	1148.78	1385.96	2201.18	1772.23	2053.28	4980.68	4606.01	5189.06	90.8516	102.121	91.3783	200.301	180.015	168.318	142.203	122.016
pgaptmp_003649	pgaptmp_003649	pgaptmp_003649	protein_coding	protein_coding	pgaptmp_003649	0.4778	1557				TRUE	-2.10875	1.84085e-05	0.000537937	Chromosome_II	405953	407509	1557	-	8.44297	169.603	168.102	214.827	326.71	279.919	200.394	135.127	150.752	178.755	512.573	426.319	420.538	413.889	508.351	407.093	557.879	536.597	541.103	941.036	867.171	517.577	4.48852	4.46197	5.75891	11.3042	9.29582	6.29985	4.13225	4.20739
pgaptmp_003590	pgaptmp_003590	pgaptmp_003590	protein_coding	protein_coding	pgaptmp_003590	0.4146	357				TRUE	-1.122	1.93157e-05	0.000561328	Chromosome_II	341497	341853	357	-	12.2867	2356.71	2740.68	2773.96	3689.91	3360.39	4416.1	3926.86	3225.5	3508.24	10190.9	9146.8	9941	4325.95	5115.7	5333.05	11484.6	7716.08	6932.46	5899.92	5361.04	5051.98	272.017	317.272	324.319	556.815	486.705	605.485	523.733	392.614
pgaptmp_003883	pgaptmp_003883	pgaptmp_003883	protein_coding	protein_coding	pgaptmp_003883	0.4942	1908	GO:0009401	GO:0022877	GO:0016020	TRUE	2.35643	1.95186e-05	0.000564108	Chromosome_II	650516	652423	1908	-	10.5817	2861.67	2081.48	1560.96	2041.62	2343.81	1780.46	2312.75	3540.44	3101.47	1909.03	2663.13	1839.62	838.088	893.499	752.266	1690.49	1149.09	6191.59	302.875	379.109	525.054	61.8015	45.0853	34.1472	57.6449	63.5167	45.6758	57.7144	80.6336
pgaptmp_005235	pgaptmp_005235	sstT	protein_coding	protein_coding	pgaptmp_005235	0.4696	1218	GO:0015826,GO:0032329	GO:0015293	GO:0016020	TRUE	-1.06736	1.96769e-05	0.000565576	Chromosome_II	2212713	2213930	1218	+	12.4249	3135.34	3337.4	3861.98	6066.56	6256.53	6142.13	6103.74	6142.03	5777.16	6572.64	7158.52	6295.1	4996.12	5406.5	5890.34	4372.02	4626.98	5530.09	6625.81	7028.48	6987.7	106.071	113.241	132.344	268.324	265.601	246.834	238.606	219.13
pgaptmp_004832	pgaptmp_004832	pgaptmp_004832	protein_coding	protein_coding	pgaptmp_004832	0.4304	237				TRUE	-1.48055	1.99525e-05	0.000570382	Chromosome_II	1758632	1758868	237	+	10.0688	369.272	506.067	524.405	748.871	606.264	1054.75	625.892	450.018	514.448	3541.6	1946.55	3130.88	1265.23	1409.62	1710.06	1978.7	1623.11	1600.82	1468.55	1130.32	1145.65	64.2031	88.2473	92.3549	170.225	132.269	217.838	125.743	82.5123
pgaptmp_003185	pgaptmp_003185	pgaptmp_003185	protein_coding	protein_coding	pgaptmp_003185	0.4762	1554				TRUE	0.919097	2.04527e-05	0.000581519	Chromosome_I	3454694	3456247	1554	-	9.45773	1020.7	1080.78	1049.63	642.53	632.207	726.533	657.075	673.161	700.241	627.599	613.173	746.594	701.107	917.917	714.06	734.85	633.797	629.743	533.105	525.018	519.238	27.0649	28.7428	28.192	22.2744	21.0355	22.8843	20.1324	18.8237
pgaptmp_002094	pgaptmp_002094	pgaptmp_002094	protein_coding	protein_coding	pgaptmp_002094	0.4749	777		GO:0016491,GO:0070403		TRUE	1.10648	2.06102e-05	0.000582846	Chromosome_I	2270531	2271307	777	-	8.95787	1450.88	1521.72	1637.75	802.683	646.545	763.643	1691.32	1513.49	1502.53	137.224	186.855	233.426	144.346	179.81	169.952	187.083	213.041	226.231	583.398	746.748	698.687	76.9427	80.9386	87.9764	55.6528	43.0251	48.1063	103.642	84.6441
pgaptmp_001216	pgaptmp_001216	nrfA	protein_coding	protein_coding	pgaptmp_001216	0.4958	1428	GO:0008152	GO:0005509,GO:0020037,GO:0042279	GO:0042597	TRUE	1.16627	2.08546e-05	0.000583862	Chromosome_I	1298386	1299813	1428	-	7.82657	578.963	673.289	579.133	454.832	485.421	340.588	533.084	464.944	527.116	88.7922	68.9366	137.092	60.3895	109.884	126.476	74.1592	125.162	111.131	219.054	279.712	267.512	16.7063	19.4857	16.9274	17.1588	17.5766	11.6744	17.7746	14.1485
pgaptmp_000792	pgaptmp_000792	dinB	protein_coding	protein_coding	pgaptmp_000792	0.4723	1029	GO:0006281	GO:0003684,GO:0003887		TRUE	1.18582	2.10671e-05	0.000583862	Chromosome_I	837017	838045	1029	+	9.83878	2779.18	2652.67	2312.45	1048.68	1185.9	702.618	1275.54	1572.45	1558.83	589.257	540.608	661.375	571.491	582.717	602.076	380.908	392.794	418.065	941.036	1116.3	1185.53	111.291	106.539	93.7989	54.9023	59.5905	33.4223	59.0217	66.4047
pgaptmp_005294	pgaptmp_005294	pgaptmp_005294	protein_coding	protein_coding	pgaptmp_005294	0.3824	693	GO:0006355	GO:0003700,GO:0043565		TRUE	-1.34576	2.15346e-05	0.000583862	Chromosome_II	2280845	2281537	693	+	8.49972	99.449	136.418	138.044	506.081	430.12	529.437	328.909	291.056	283.615	308.755	308.401	583.566	191.479	277.484	434.76	1464.64	837.517	1824.4	349.815	300.101	284.127	5.91324	8.13543	8.31432	39.3415	32.0922	37.395	22.5982	18.2508
pgaptmp_000458	pgaptmp_000458	pgaptmp_000458	protein_coding	protein_coding		0.5	1000				TRUE	-1.8628	2.16542e-05	0.000583862	pgaptmp_000458	1	1000	1000	+	9.67617	225.88	314.202	229.529	840.478	531.163	651.488	396.472	282.101	287.838	2579.01	2298.49	2569.54	1350.66	1277.54	1181.76	1965.22	1439.36	1528.05	729.247	772.235	1236.2	9.30758	12.9852	9.58031	45.2784	27.4645	31.8889	18.8775	12.2586
pgaptmp_001567	pgaptmp_001567	pgaptmp_001567	protein_coding	protein_coding	pgaptmp_001567	0.4115	384				TRUE	2.07023	2.17579e-05	0.000583862	Chromosome_I	1627314	1627697	384	-	10.698	2719.04	3514.31	4085.79	2595.11	2681.08	4248.69	5131.86	3680.74	3661.66	918.192	1101.17	980.021	820.413	897.939	873.472	1505.09	1326.18	988.273	1032.12	692.59	583.209	291.772	378.225	444.105	364.073	361.012	541.573	636.322	416.525
pgaptmp_005221	pgaptmp_005221	pgaptmp_005221	protein_coding	protein_coding	pgaptmp_005221	0.4475	324				TRUE	-1.53084	2.17868e-05	0.000583862	Chromosome_II	2191967	2192290	324	+	8.89769	254.405	329.164	300.594	749.512	751.685	705.916	443.247	372.403	355.399	365.259	386.408	272.331	287.218	414.006	408.411	726.423	605.835	657.526	1024.86	688.767	753.519	32.3547	41.9864	38.7236	124.623	119.96	106.645	65.1379	49.9465
pgaptmp_003360	pgaptmp_003360	pgaptmp_003360	protein_coding	protein_coding	pgaptmp_003360	0.5183	519				TRUE	-1.32365	2.17928e-05	0.000583862	Chromosome_II	96227	96745	519	+	8.65012	164.977	237.632	214.01	492.628	445.822	557.476	320.742	250.01	244.908	407.637	535.166	474.263	397.687	342.97	400.506	689.343	695.046	676.047	542.605	433.267	524.223	13.0983	18.9225	17.211	51.1347	44.4159	52.5765	29.4253	20.9328
pgaptmp_004139	pgaptmp_004139	pgaptmp_004139	protein_coding	protein_coding	pgaptmp_004139	0.4405	9966				TRUE	-0.921905	2.18661e-05	0.000583862	Chromosome_II	957137	967102	9966	+	9.67699	669.932	707.614	744.95	1055.08	1025.46	1009.39	1141.16	1179.9	1154.17	742.625	647.641	631.734	631.88	611.575	512.49	561.25	623.145	546.394	1274.65	1199.77	1379.93	2.76992	2.93439	3.11995	5.70335	5.32037	4.95761	5.45202	5.14471
pgaptmp_004878	pgaptmp_004878	pgaptmp_004878	protein_coding	protein_coding	pgaptmp_004878	0.4512	1332				TRUE	-1.32091	2.19346e-05	0.000583862	Chromosome_II	1810983	1812314	1332	-	6.96697	84.0306	106.494	99.6534	160.793	168.634	178.128	161.856	138.065	163.272	94.8462	119.732	100.04	98.6852	94.3446	105.396	60.6757	86.5479	74.0874	267.67	247.854	203.541	2.59951	3.30418	3.12269	6.50319	6.54614	6.54579	5.78571	4.50419
pgaptmp_003617	pgaptmp_003617	emrD	protein_coding	protein_coding	pgaptmp_003617	0.4925	1206	GO:0042908	GO:0042910	GO:0016020	TRUE	-0.990031	2.19376e-05	0.000583862	Chromosome_II	366395	367600	1206	-	11.3569	883.477	1038.54	1103.54	1335.03	1637.87	2299.18	1441.11	1141.84	1126.02	5349.73	6284.12	6493.33	5364.35	4407.56	5292.21	7860.87	7280.67	5966.68	1913.37	1892.99	1933.23	30.1861	35.5891	38.1928	59.6358	70.2224	93.3163	56.8961	41.1428
pgaptmp_003766	pgaptmp_003766	fliN	protein_coding	protein_coding	pgaptmp_003766	0.4444	369	GO:0001539	GO:0003774	GO:0009288,GO:0016020	TRUE	1.36401	2.20402e-05	0.000583862	Chromosome_II	520430	520798	369	-	4.72146	49.3391	66.8889	71.8811	20.4995	12.9719	29.6881	23.7586	14.1797	18.2977	20.18	12.6989	31.494	39.7687	15.5391	38.2062	23.5961	15.9781	51.5966	16.7643	19.7519	19.9388	5.50963	7.49151	8.13073	2.99282	1.81769	3.93811	3.06569	1.66985
pgaptmp_003690	pgaptmp_003690	pgaptmp_003690	protein_coding	protein_coding	pgaptmp_003690	0.4692	552				TRUE	-1.05422	2.20759e-05	0.000583862	Chromosome_II	448169	448720	552	-	7.87887	214.317	205.067	196.856	338.241	279.919	268.842	306.635	356.73	359.621	181.62	186.855	222.311	144.346	102.114	159.412	146.633	195.731	186.541	374.962	402.683	469.392	15.9983	15.3532	14.8851	33.0105	26.2203	23.8391	26.4494	28.0827
pgaptmp_004298	pgaptmp_004298	pgaptmp_004298	protein_coding	protein_coding	pgaptmp_004298	0.4644	1305				TRUE	-1.09103	2.20891e-05	0.000583862	Chromosome_II	1154170	1155474	1305	-	12.5187	4230.82	4061.74	3677.37	7131.25	7824.08	4647.83	4499.29	5027.81	4906.61	7079.16	7231.09	7228.81	7112.7	8615.33	8878.32	4164.71	4117.02	4085.39	7952.43	7645.89	8792.99	133.59	128.63	117.616	294.388	310.004	174.33	164.16	167.419
pgaptmp_004146	pgaptmp_004146	tssI	protein_coding	protein_coding	pgaptmp_004146	0.4618	2079	GO:0033103	GO:0003674		TRUE	-1.153	2.22501e-05	0.000585179	Chromosome_II	980923	983001	2079	+	6.95359	100.22	78.3304	89.8514	119.794	129.719	122.051	167.053	158.215	140.752	141.26	126.989	74.1036	116.36	142.072	104.079	102.812	94.5369	87.3173	193.348	193.696	210.188	1.98636	1.5571	1.80389	3.10416	3.2262	2.87355	3.82589	3.30698
pgaptmp_001963	pgaptmp_001963	pgaptmp_001963	protein_coding	protein_coding	pgaptmp_001963	0.4408	735				TRUE	-1.96936	2.23685e-05	0.000585365	Chromosome_I	2123423	2124157	735	-	7.04772	102.533	139.939	156.832	92.8882	96.9476	118.752	83.8977	89.5557	85.1549	66.5941	85.2637	85.2192	110.469	98.7843	102.761	150.004	162.444	116.423	652.131	507.814	379.667	5.74822	7.8685	8.90609	6.80828	6.82014	7.90838	5.43495	5.29473
pgaptmp_001973	pgaptmp_001973	pgaptmp_001973	protein_coding	protein_coding	pgaptmp_001973	0.4305	597	GO:0000160			TRUE	1.07708	2.25939e-05	0.000588337	Chromosome_I	2132718	2133314	597	-	5.93981	177.312	195.386	200.124	121.716	114.699	87.4149	106.914	129.11	115.417	30.2701	21.7695	29.6415	32.4041	21.0888	14.492	20.2252	22.6356	33.0747	73.7629	90.4763	83.0781	12.2383	13.5257	13.9915	10.9834	9.93408	7.1671	8.52692	9.3977
pgaptmp_004292	pgaptmp_004292	pgaptmp_004292	protein_coding	protein_coding	pgaptmp_004292	0.4523	639				TRUE	-0.969851	2.31339e-05	0.000599431	Chromosome_II	1143921	1144559	639	-	8.9218	290.638	315.082	304.678	642.53	603.533	599.534	414.291	411.956	374.4	615.491	538.794	503.905	459.549	559.408	503.267	541.025	535.265	494.798	594.574	580.45	542.5	18.7417	20.3781	19.9013	54.1698	48.8364	45.9246	30.8701	28.0148
pgaptmp_003429	pgaptmp_003429	pgaptmp_003429	protein_coding	protein_coding	pgaptmp_003429	0.4881	168				TRUE	-1.51162	2.3889e-05	0.000614821	Chromosome_II	175553	175720	168	-	7.78163	104.075	151.38	147.846	303.008	213.694	319.147	312.575	217.173	247.02	161.44	110.661	164.881	173.804	192.019	202.888	271.355	244.997	252.691	436.431	369.551	322.343	25.5266	37.2393	36.7318	97.1648	65.77	92.9852	88.5884	56.1737
pgaptmp_005030	pgaptmp_005030	pgaptmp_005030	protein_coding	protein_coding	pgaptmp_005030	0.4481	549			GO:0016020	TRUE	-1.12323	2.4126e-05	0.000614821	Chromosome_II	1988446	1988994	549	+	10.6836	541.188	504.307	561.98	769.371	911.444	1348.33	706.077	614.949	572.156	5254.88	5950.32	5924.59	3437.78	3096.72	3596.65	5464.18	4637.64	3769.2	1198.09	941.719	1229.56	40.6194	37.9633	42.7257	75.4966	85.8423	120.215	61.2368	48.6748
pgaptmp_001803	pgaptmp_001803	pgaptmp_001803	protein_coding	protein_coding	pgaptmp_001803	0.4588	1395				TRUE	1.11907	2.41821e-05	0.000614821	Chromosome_I	1926511	1927905	1395	+	6.26583	178.083	211.228	168.267	129.403	118.112	103.908	158.886	150.006	152.012	14.126	48.9813	38.9044	33.877	47.7273	44.7934	62.3611	37.2822	37.0437	73.2041	80.919	78.9242	5.26026	6.25776	5.03461	4.99729	4.37789	3.64593	5.42305	4.67274
pgaptmp_003699	pgaptmp_003699	pgaptmp_003699	protein_coding	protein_coding	pgaptmp_003699	0.4473	237				TRUE	-1.36918	2.41954e-05	0.000614821	Chromosome_II	458124	458360	237	+	7.7001	165.748	217.389	190.322	513.768	313.373	600.359	701.622	475.392	506.707	131.17	70.7507	120.418	66.2811	62.1564	73.7774	102.812	90.5424	108.485	524.723	514.823	398.775	28.8177	37.908	33.5182	116.784	68.3686	123.992	140.957	87.1647
pgaptmp_003825	pgaptmp_003825	pgaptmp_003825	protein_coding	protein_coding	pgaptmp_003825	0.4471	255				TRUE	-1.43674	2.43439e-05	0.00061562	Chromosome_II	589289	589543	255	-	8.81396	346.144	394.292	417.401	777.058	724.376	848.584	607.33	424.643	529.931	312.791	293.888	316.793	167.912	269.715	333.316	347.2	299.589	300.319	1197.53	1000.97	810.843	55.9339	63.9028	68.3209	164.164	146.882	162.887	113.401	72.3639
pgaptmp_005311	pgaptmp_005311	pgaptmp_005311	protein_coding	protein_coding	pgaptmp_005311	0.4505	1092		GO:0005525,GO:0046872	GO:0005886	TRUE	-1.24944	2.46578e-05	0.000620574	Chromosome_II	2297045	2298136	1092	+	7.60545	109.471	114.415	100.47	282.508	229.397	182.252	152.946	189.56	192.126	274.448	214.066	196.375	217.991	309.672	303.014	163.487	134.482	153.467	212.907	247.854	307.389	4.13081	4.33015	3.84021	13.9371	10.862	8.16924	6.66882	7.54329
pgaptmp_003520	pgaptmp_003520	pgaptmp_003520	protein_coding	protein_coding	pgaptmp_003520	0.4393	387				TRUE	-1.58493	2.49e-05	0.000623686	Chromosome_II	272617	273003	387	-	7.63917	77.8632	88.8918	81.6831	209.479	200.04	370.276	158.886	135.826	141.456	308.755	266.676	257.51	187.06	175.37	206.84	385.965	366.164	216.97	321.875	198.156	230.957	8.29048	9.49276	8.80972	29.1604	26.7269	46.8325	19.5482	15.2514
pgaptmp_004560	pgaptmp_004560	pgaptmp_004560	protein_coding	protein_coding	pgaptmp_004560	0.4372	462				TRUE	-1.4416	2.50706e-05	0.000624982	Chromosome_II	1444720	1445181	462	+	8.16569	137.995	164.582	168.267	315.82	290.16	325.744	305.892	232.099	251.946	456.069	382.78	372.371	156.129	247.516	165.999	453.382	378.148	379.698	500.694	323.039	430.345	12.3078	14.7225	15.2019	36.8266	32.4743	34.5118	31.5253	21.8307
pgaptmp_003679	pgaptmp_003679	pgaptmp_003679	protein_coding	protein_coding	pgaptmp_003679	0.441	288				TRUE	1.2991	2.5579e-05	0.000634648	Chromosome_II	436217	436504	288	-	8.73428	2036.01	1841.2	1650.82	916.07	847.267	767.766	1035.73	1417.22	1247.06	98.8822	139.687	120.418	94.2665	79.9154	72.46	138.206	141.14	355.884	584.515	765.226	786.75	291.303	264.211	239.247	171.356	152.115	130.488	171.232	213.837
pgaptmp_002337	pgaptmp_002337	pgaptmp_002337	protein_coding	protein_coding	pgaptmp_002337	0.4457	1308				TRUE	0.898367	2.57997e-05	0.00063712	Chromosome_I	2539914	2541221	1308	-	11.172	4021.13	4346.02	4343.09	1920.54	2093.25	1903.34	1882.13	1773.2	1803.74	2108.81	2298.49	2165.68	2172.55	2192.12	2424.12	2002.3	2109.11	2311.26	2083.24	2130.02	2278	126.677	137.317	138.59	79.1008	82.7479	71.2263	68.5132	58.9099
pgaptmp_001515	pgaptmp_001515	pgaptmp_001515	protein_coding	protein_coding	pgaptmp_001515	0.4899	3711				TRUE	1.32327	2.61107e-05	0.000641785	Chromosome_I	1569540	1573250	3711	-	7.38462	339.977	289.558	316.114	153.105	152.931	196.271	164.083	172.395	162.568	133.188	145.13	157.47	134.035	133.192	155.46	176.971	137.145	209.032	136.35	110.228	99.6938	3.775	3.22468	3.55544	2.22261	2.13083	2.5888	2.10526	2.01869
pgaptmp_005312	pgaptmp_005312	pgaptmp_005312	protein_coding	protein_coding	pgaptmp_005312	0.4691	405				TRUE	-1.34964	2.62841e-05	0.000643043	Chromosome_II	2298147	2298551	405	+	8.69944	168.061	224.43	196.039	420.239	293.574	573.969	316.287	234.338	223.796	768.859	665.783	716.953	326.987	518.34	483.506	812.38	633.797	620.482	575.574	419.887	462.745	17.099	22.9017	20.2036	55.8992	37.4805	69.3692	37.1842	25.1434
pgaptmp_004046	pgaptmp_004046	pgaptmp_004046	protein_coding	protein_coding	pgaptmp_004046	0.4648	1164	GO:0055085	GO:0022857		TRUE	-1.21342	2.64344e-05	0.000643727	Chromosome_II	813480	814643	1164	-	7.56465	84.8015	76.5702	71.8811	173.605	193.212	164.109	128.445	108.959	140.752	262.34	252.163	211.195	198.843	237.526	256.904	616.869	524.613	354.561	158.702	173.944	214.342	3.00199	2.71862	2.57752	8.03477	8.58274	6.901	5.25409	4.06771
pgaptmp_001159	pgaptmp_001159	pgaptmp_001159	protein_coding	protein_coding	pgaptmp_001159	0.4531	384				TRUE	1.58521	2.68995e-05	0.000652034	Chromosome_I	1230749	1231132	384	+	6.65624	466.408	364.368	433.737	320.945	261.485	153.388	455.869	463.451	453.221	26.234	18.1412	14.8207	13.2562	27.7484	30.3014	37.0796	38.6137	37.0437	94.9977	138.263	157.018	50.0487	39.2149	47.1451	45.026	35.2095	19.5521	56.5251	52.4457
pgaptmp_003629	pgaptmp_003629	pgaptmp_003629	protein_coding	protein_coding	pgaptmp_003629	0.4572	339				TRUE	-1.27083	2.76862e-05	0.000668024	Chromosome_II	379194	379532	339	-	12.1218	1810.9	2378.96	2249.55	4040.96	2864.05	5984.62	4261.7	3074.75	2943.12	8404.98	5765.28	8149.55	4449.67	4122.3	4418.74	10062.1	5946.51	7248.66	5675.28	4559.5	4556.84	220.116	290.02	276.973	642.168	436.842	864.111	598.572	394.137
pgaptmp_004311	pgaptmp_004311	pgaptmp_004311	protein_coding	protein_coding	pgaptmp_004311	0.4368	570				TRUE	-1.07093	2.79207e-05	0.000670606	Chromosome_II	1166775	1167344	570	+	9.05474	296.805	291.319	291.609	568.86	491.565	575.619	412.806	384.343	435.627	504.501	439.017	433.506	506.682	584.936	517.759	1464.64	1165.07	1139.09	670.013	560.061	553.3	21.4563	21.122	21.3534	53.7644	44.5913	49.4302	34.4829	29.301
pgaptmp_002557	pgaptmp_002557	pgaptmp_002557	protein_coding	protein_coding	pgaptmp_002557	0.4352	471				TRUE	0.938783	2.81733e-05	0.000673597	Chromosome_I	2759840	2760310	471	-	9.42272	1669.82	1950.34	1892.6	1269.05	897.106	1448.94	2219.2	1629.17	1754.47	181.62	195.925	196.375	237.139	246.406	246.364	397.763	415.43	439.232	890.743	947.453	888.105	146.085	171.132	167.717	145.151	98.4843	150.579	224.341	150.308
pgaptmp_001382	pgaptmp_001382	pgaptmp_001382	protein_coding	protein_coding	pgaptmp_001382	0.4121	495				TRUE	1.08846	2.86205e-05	0.000681195	Chromosome_I	1443705	1444199	495	+	8.05104	417.84	535.111	486.831	294.039	291.525	402.438	337.818	302.997	302.617	244.178	195.925	174.144	253.341	209.778	171.269	220.792	239.671	166.697	230.23	193.696	208.526	34.7827	44.6766	41.0501	32.0011	30.452	39.7948	32.4945	26.5993
pgaptmp_004662	pgaptmp_004662	pgaptmp_004662	protein_coding	protein_coding	pgaptmp_004662	0.4618	249				TRUE	-1.41029	3.05638e-05	0.000722657	Chromosome_II	1576766	1577014	249	+	8.31412	151.101	213.868	143.762	297.883	238.955	395.016	469.233	149.26	206.905	605.401	585.961	542.809	210.627	236.416	237.142	573.048	382.142	420.711	423.578	392.489	510.1	25.0049	35.4968	24.0983	64.4482	49.6205	77.6512	89.7268	26.0484
pgaptmp_001718	pgaptmp_001718	pgaptmp_001718	protein_coding	protein_coding	pgaptmp_001718	0.4508	417				TRUE	1.24365	3.06373e-05	0.000722657	Chromosome_I	1814137	1814553	417	-	10.548	2204.84	1887.85	1739.03	1090.32	1273.97	1276.59	1612.62	1979.18	1822.03	3337.78	3858.64	3977.51	1381.59	1363	1177.8	1162.95	1055.88	967.105	740.423	690.041	917.183	217.871	187.1	174.065	140.858	157.968	149.847	184.131	206.247
pgaptmp_004189	pgaptmp_004189	pgaptmp_004189	protein_coding	protein_coding	pgaptmp_004189	0.46	2037	GO:0015891	GO:0015343		TRUE	-1.10285	3.07869e-05	0.000722942	Chromosome_II	1031815	1033851	2037	+	8.33294	201.982	170.743	187.054	449.067	509.316	348.01	196.751	259.712	268.836	464.141	654.898	327.909	245.977	267.495	160.729	672.489	474.016	316.194	345.345	384.843	445.299	4.08582	3.46412	3.83281	11.8764	12.9283	8.36245	4.59895	5.54036
pgaptmp_003884	pgaptmp_003884	pgaptmp_003884	protein_coding	protein_coding	pgaptmp_003884	0.427	843	GO:0006355	GO:0003700,GO:0043565		TRUE	0.965134	3.12833e-05	0.000731334	Chromosome_II	652806	653648	843	+	10.2996	3294.92	3692.97	3185.64	4187.02	3417.06	4112.62	6110.42	5035.27	5651.19	298.665	319.285	261.215	195.898	213.108	183.126	810.694	501.978	900.956	1557.96	1720.32	1679.01	161.056	181.046	157.728	267.572	209.589	238.794	345.125	259.557
pgaptmp_004558	pgaptmp_004558	pgaptmp_004558	protein_coding	protein_coding	pgaptmp_004558	0.5084	297				TRUE	-1.08342	3.23206e-05	0.000748527	Chromosome_II	1442910	1443206	297	+	6.97212	69.383	57.2076	72.6979	113.388	168.634	121.226	96.5194	89.5557	95.7113	151.35	170.527	150.06	169.385	116.543	185.761	156.746	154.455	181.249	144.173	137.626	145.387	9.62621	7.96047	10.2166	20.5671	29.3584	19.979	15.4736	13.1031
pgaptmp_001652	pgaptmp_001652	pgaptmp_001652	protein_coding	protein_coding	pgaptmp_001652	0.4548	1317	GO:0055085	GO:0015562	GO:0019867	TRUE	1.05338	3.24188e-05	0.000748527	Chromosome_I	1727536	1728852	1317	-	6.95305	304.514	300.12	298.96	206.917	206.867	145.966	252.435	254.488	273.059	52.4681	70.7507	48.1674	50.0791	89.9048	61.9203	72.4737	67.9068	41.0127	121.262	124.246	160.341	9.52753	9.41782	9.47476	8.46396	8.12175	5.425	9.12636	8.39689
pgaptmp_003527	pgaptmp_003527	pgaptmp_003527	protein_coding	protein_coding	pgaptmp_003527	0.4541	762				TRUE	-1.00564	3.24457e-05	0.000748527	Chromosome_II	280394	281155	762	-	6.63591	81.7178	73.0497	74.3316	133.887	128.353	121.226	118.793	152.991	116.12	94.8462	87.0778	83.3666	86.9019	82.1353	72.46	55.6194	77.2273	66.1495	157.584	151.643	151.202	4.41896	3.96191	4.07155	9.4656	8.70954	7.78708	7.42283	8.72466
pgaptmp_001160	pgaptmp_001160	pgaptmp_001160	protein_coding	protein_coding	pgaptmp_001160	0.4769	1407		GO:0015293	GO:0016020	TRUE	0.984261	3.26099e-05	0.00074903	Chromosome_I	1231173	1232579	1407	+	8.95244	859.579	806.187	730.247	520.174	535.943	454.392	736.518	942.574	789.618	381.403	399.107	496.494	375.593	364.059	437.395	345.514	332.876	369.114	383.903	371.463	390.467	25.1739	23.6801	21.6629	19.9168	19.6955	15.8077	24.9242	29.1111
pgaptmp_002811	pgaptmp_002811	gltB	protein_coding	protein_coding	pgaptmp_002811	0.4871	4551	GO:0006537,GO:0008152	GO:0003824,GO:0015930,GO:0016491		TRUE	1.17246	3.30539e-05	0.000755929	Chromosome_I	3045626	3050176	4551	+	10.5354	2079.95	1648.46	1664.7	999.349	1141.52	762.818	909.51	1299.3	1278.03	2306.58	2053.59	1789.6	2944.35	3581.76	3070.98	1789.93	1772.23	1383.85	689.572	783.066	804.196	18.8323	14.9697	15.2676	11.8297	12.9695	8.20441	9.51554	12.4063
pgaptmp_001900	pgaptmp_001900	pgaptmp_001900	protein_coding	protein_coding	pgaptmp_001900	0.4241	474	GO:0000160			TRUE	1.05485	3.33746e-05	0.000759959	Chromosome_I	2043046	2043519	474	-	7.42156	461.012	426.857	378.193	356.178	398.031	187.2	253.92	309.714	316.692	96.8642	65.3084	100.04	69.2269	69.926	93.5392	75.8446	99.8629	96.5782	179.937	198.156	192.741	40.0767	37.2173	33.3024	40.4812	43.4193	19.3312	25.5066	28.3935
pgaptmp_001899	pgaptmp_001899	pgaptmp_001899	protein_coding	protein_coding	pgaptmp_001899	0.4429	1707				TRUE	0.939409	3.38349e-05	0.000767119	Chromosome_I	2041254	2042960	1707	+	11.811	9849.31	10269.2	9857.51	6660.41	6448.38	4205.81	7037.01	9243.65	8103.79	1715.3	1681.69	1754.4	1736.57	1650.48	1663.94	1105.65	1143.76	1293.88	4767.21	4987.03	5142.54	237.755	248.625	241.032	210.199	195.326	120.6	196.285	235.314
pgaptmp_004580	pgaptmp_004580	pgaptmp_004580	protein_coding	protein_coding	pgaptmp_004580	0.4607	573				TRUE	1.30757	3.46706e-05	0.000782372	Chromosome_II	1469515	1470087	573	-	6.74884	107.929	115.295	101.287	112.747	118.112	92.3629	120.278	158.961	169.606	157.404	107.033	155.618	86.9019	86.575	114.618	210.679	214.372	141.56	38.5579	28.6721	45.693	7.76144	8.3157	7.37802	10.6002	10.6582	7.88998	9.99458	12.0552
pgaptmp_001137	pgaptmp_001137	pgaptmp_001137	protein_coding	protein_coding	pgaptmp_001137	0.4369	1767				TRUE	0.949558	3.48051e-05	0.000782372	Chromosome_I	1205657	1207423	1767	+	10.2279	2874.77	2688.76	2720.86	1545.15	1585.3	1300.5	1695.77	2144.86	2073.28	577.149	607.731	646.554	871.965	841.332	773.345	640.465	611.161	697.215	1231.62	1360.33	1496.24	67.0386	62.8864	64.2704	47.1083	46.3893	36.0253	45.6945	52.7473
pgaptmp_003192	pgaptmp_003192	pgaptmp_003192	protein_coding	protein_coding		0.5	1000				TRUE	-1.44138	3.51302e-05	0.000783062	pgaptmp_003192	1	1000	1000	+	13.7423	3163.87	4185.84	4058.83	7713.57	8378.46	12144.1	5004.16	4309.12	3105.69	33319.3	68831.4	59164.3	30548.2	25246.6	25060.6	66591.6	42977	38418.3	11446.1	9872.12	8098.46	130.37	172.991	169.411	415.546	433.219	594.425	238.267	187.252
pgaptmp_004188	pgaptmp_004188	pgaptmp_004188	protein_coding	protein_coding	pgaptmp_004188	0.4774	1215				TRUE	-1.18947	3.51336e-05	0.000783062	Chromosome_II	1030359	1031573	1215	-	6.13938	37.0043	41.3655	31.0396	86.4822	99.6785	75.8695	35.638	53.7334	47.1519	86.7742	63.4943	61.1355	89.8477	98.7843	82.9996	91.0135	107.852	99.2242	85.498	80.919	99.6938	1.25497	1.40703	1.0663	3.83455	4.24198	3.0565	1.39659	1.92179
pgaptmp_001799	pgaptmp_001799	pgaptmp_001799	protein_coding	protein_coding	pgaptmp_001799	0.4633	1470				TRUE	1.28295	3.55158e-05	0.00078824	Chromosome_I	1922416	1923885	1470	+	7.64167	474.888	639.845	666.534	309.414	288.795	303.478	325.196	279.115	299.098	72.6481	78.0072	64.8407	123.725	130.972	126.476	143.262	113.178	84.6713	225.759	253.589	201.88	13.3117	17.9887	18.9254	11.3393	10.1582	10.1051	10.5332	8.25095
pgaptmp_002140	pgaptmp_002140	pgaptmp_002140	protein_coding	protein_coding	pgaptmp_002140	0.4694	1440	GO:0009401	GO:0008982	GO:0016020	TRUE	1.37451	3.60297e-05	0.000796288	Chromosome_I	2325593	2327032	1440	-	8.13232	662.994	629.284	622.425	340.804	336.586	352.133	583.571	524.647	565.119	104.936	114.29	133.387	179.695	120.983	189.713	212.365	195.731	404.835	171.555	266.332	255.05	18.9716	18.0603	18.0412	12.7499	12.0858	11.9695	19.2959	15.8322
pgaptmp_004300	pgaptmp_004300	pgaptmp_004300	protein_coding	protein_coding	pgaptmp_004300	0.3745	510				TRUE	-1.37558	3.6194e-05	0.000796572	Chromosome_II	1156292	1156801	510	+	10.422	556.606	674.17	659.999	1606.01	1549.8	2438.55	1143.38	934.365	957.113	1685.03	1623.64	1884.09	1752.77	1444.03	1450.52	2120.28	1860.11	1787.36	1884.87	1531.09	1271.93	44.9714	54.6312	54.015	169.645	157.126	234.042	106.747	79.613
pgaptmp_004894	pgaptmp_004894	pgaptmp_004894	protein_coding	protein_coding	pgaptmp_004894	0.4167	408		GO:0022857	GO:0016020	TRUE	-1.2085	3.68192e-05	0.000806954	Chromosome_II	1830245	1830652	408	+	7.33661	229.735	183.064	189.505	320.304	347.509	229.258	124.733	167.171	152.012	151.35	146.944	133.387	66.2811	78.8055	80.3647	70.7883	70.5698	55.5655	459.342	388.029	514.254	23.202	18.5432	19.3866	42.2928	44.0403	27.5041	14.5564	17.8048
pgaptmp_001747	pgaptmp_001747	pgaptmp_001747	protein_coding	protein_coding	pgaptmp_001747	0.4388	417		GO:0016787		TRUE	1.3944	3.70476e-05	0.000808591	Chromosome_I	1843516	1843932	417	-	5.87323	222.026	153.14	195.223	125.559	90.1203	79.9929	152.946	126.124	152.012	20.18	14.513	12.9681	35.3499	27.7484	26.3491	18.5398	33.2876	27.7828	55.3222	64.99	74.7703	21.9394	15.1773	19.5405	16.221	11.1746	9.38962	17.4637	13.1432
pgaptmp_001734	pgaptmp_001734	pgaptmp_001734	protein_coding	protein_coding	pgaptmp_001734	0.4649	699	GO:0055085		GO:0016020	TRUE	1.18506	3.76533e-05	0.000818415	Chromosome_I	1834451	1835149	699	+	9.78855	1264.31	1123.03	1114.16	696.982	979.717	597.885	824.128	1038.85	995.116	1576.06	2004.6	1622.87	1029.57	731.448	778.615	846.089	730.997	642.973	405.137	476.594	581.547	74.5308	66.3981	66.5289	53.7166	72.4715	41.8671	56.1371	64.582
pgaptmp_003800	pgaptmp_003800	pgaptmp_003800	protein_coding	protein_coding	pgaptmp_003800	0.4792	288				TRUE	-1.25026	3.84579e-05	0.000830294	Chromosome_II	556335	556622	288	+	7.58996	92.5107	128.497	130.693	275.462	176.144	307.601	249.466	198.515	213.943	177.584	165.085	161.175	197.37	145.402	156.777	235.961	201.057	168.02	246.994	255.5	324.836	13.236	18.4392	18.9409	51.5268	31.6242	52.2792	41.2431	29.9529
pgaptmp_001753	pgaptmp_001753	pgaptmp_001753	protein_coding	protein_coding	pgaptmp_001753	0.436	867				TRUE	0.90922	3.85155e-05	0.000830294	Chromosome_I	1849673	1850539	867	+	7.76664	515.747	521.909	472.128	290.836	341.365	219.362	337.076	336.58	368.77	147.314	139.687	96.3347	94.2665	108.774	93.5392	148.318	166.438	128.33	238.053	253.589	265.85	24.5119	24.8781	22.7291	18.0715	20.3584	12.3844	18.5115	16.8697
pgaptmp_003333	pgaptmp_003333	pgaptmp_003333	protein_coding	protein_coding	pgaptmp_003333	0.4242	825	GO:0006355	GO:0003700,GO:0043565		TRUE	-1.09045	3.87594e-05	0.000832141	Chromosome_II	69464	70288	825	+	8.15895	563.545	719.936	723.712	1062.13	776.263	781.786	1478.23	1191.09	1299.84	38.3421	36.2824	68.5459	33.877	44.3975	63.2378	65.732	65.2438	74.0874	1470.23	1361.61	1251.16	28.147	36.0646	36.6145	69.3566	48.6518	46.3838	85.3142	62.7377
pgaptmp_004791	pgaptmp_004791	pgaptmp_004791	protein_coding	protein_coding	pgaptmp_004791	0.4195	348				TRUE	-1.47159	4.04434e-05	0.000864765	Chromosome_II	1715376	1715723	348	-	10.4226	591.298	824.67	813.564	1279.3	1093.73	2013.84	1205.75	938.096	1037.34	1791.99	1961.07	2239.78	1200.42	1085.52	1300.33	2005.67	2071.82	1426.18	2417.41	1776.39	1707.26	70.014	97.936	97.5783	198.041	162.508	283.256	164.972	117.14
pgaptmp_001818	pgaptmp_001818	pgaptmp_001818	protein_coding	protein_coding	pgaptmp_001818	0.4386	399		GO:0046872		TRUE	0.893374	4.07594e-05	0.000867994	Chromosome_I	1947287	1947685	399	-	8.24406	1177.97	1300.81	1360.02	945.538	758.512	1038.26	1579.21	980.635	1182.32	48.4321	43.5389	44.4622	50.0791	58.8266	46.1109	101.126	125.162	87.3173	680.631	649.9	625.578	121.652	134.736	142.27	127.665	98.2955	127.369	188.451	106.8
pgaptmp_000500	pgaptmp_000500	pgaptmp_000500	protein_coding	protein_coding	pgaptmp_000500	0.526	192				TRUE	2.48537	4.10858e-05	0.000868567	Chromosome_I	516558	516749	192	+	7.44347	481.827	234.991	374.109	35.8741	34.8192	25.5647	26.7285	35.8223	45.7444	768.859	983.254	872.57	637.772	542.759	635.013	375.852	366.164	467.015	64.2632	34.4065	71.4472	103.407	50.5815	81.3275	10.0657	9.37695	6.51737	6.62835	8.10755
pgaptmp_003367	pgaptmp_003367	pgaptmp_003367	protein_coding	protein_coding	pgaptmp_003367	0.4513	636				TRUE	-1.04238	4.11166e-05	0.000868567	Chromosome_II	103515	104150	636	-	8.03866	111.784	129.377	143.762	265.853	253.975	314.199	271.739	223.143	223.796	230.052	239.464	248.247	334.351	360.729	339.903	421.359	418.093	592.699	275.493	259.96	240.096	7.24236	8.40702	9.43471	22.5189	20.648	24.1813	20.3436	15.2463
pgaptmp_000572	pgaptmp_000572	rpoS	protein_coding	protein_coding	pgaptmp_000572	0.4587	981	GO:0006352,GO:0006355	GO:0003677,GO:0003700,GO:0016987		TRUE	1.27246	4.19894e-05	0.000883458	Chromosome_I	581186	582166	981	+	10.4787	3178.51	3101.53	2354.92	2123.62	2322.65	1022.59	2147.19	3101.61	2736.92	706.301	838.124	889.244	972.123	1053.33	999.947	996.092	995.966	1043.84	990.212	1129.04	1290.2	133.51	130.662	100.196	116.62	122.422	51.0229	104.216	137.39
pgaptmp_004333	pgaptmp_004333	pgaptmp_004333	protein_coding	protein_coding	pgaptmp_004333	0.4583	840		GO:0016491		TRUE	-1.01202	4.26888e-05	0.000893513	Chromosome_II	1190163	1191002	840	+	11.6449	2221.03	2584.02	2923.44	3830.84	3199.27	3856.15	4720.54	4064.34	4121.22	3212.66	2781.05	3104.94	2281.54	2774.84	2895.76	1918.03	2296.85	2407.84	4663.83	5136.76	5050.32	108.951	127.133	145.263	245.685	196.932	224.702	267.575	210.256
pgaptmp_005293	pgaptmp_005293	pgaptmp_005293	protein_coding	protein_coding	pgaptmp_005293	0.355	786				TRUE	-1.55381	4.28071e-05	0.000893513	Chromosome_II	2279917	2280702	786	+	8.57342	131.828	183.064	176.435	546.439	469.718	595.411	470.718	379.866	392.698	347.097	297.516	405.717	134.035	207.558	357.03	950.586	647.112	1289.91	562.722	481.691	361.39	6.91103	9.62549	9.36924	37.4527	30.9	37.0789	28.5148	21.0012
pgaptmp_003289	pgaptmp_003289	pgaptmp_003289	protein_coding	protein_coding	pgaptmp_003289	0.5133	1734				TRUE	-0.910829	4.31924e-05	0.000895149	Chromosome_II	25213	26946	1734	-	8.16118	182.709	184.825	175.619	146.059	144.056	233.381	222.737	249.263	286.43	365.259	502.512	503.905	318.149	256.395	280.618	428.101	446.054	534.488	332.492	298.827	363.051	4.34179	4.40506	4.22729	4.53777	4.29562	6.58794	6.11613	6.24665
pgaptmp_004854	pgaptmp_004854	pgaptmp_004854	protein_coding	protein_coding	pgaptmp_004854	0.4798	1038		GO:0042626,GO:0140359		TRUE	-1.36356	4.32258e-05	0.000895149	Chromosome_II	1777329	1778366	1038	+	9.2802	399.338	320.363	379.826	770.011	966.745	624.274	398.7	547.783	520.782	803.165	1086.66	789.204	516.993	490.592	494.045	610.128	688.389	658.849	732.041	869.083	1145.65	15.8526	12.7552	15.2732	39.9636	48.1569	29.4382	18.2886	22.9323
pgaptmp_001886	pgaptmp_001886	pgaptmp_001886	protein_coding	protein_coding	pgaptmp_001886	0.4491	216				TRUE	1.07417	4.34889e-05	0.000896847	Chromosome_I	2026397	2026612	216	-	9.46478	1950.43	2418.56	2722.5	1339.51	889.596	1037.43	1742.55	1489.61	1499.01	276.466	293.888	294.562	191.479	221.987	260.856	364.054	346.192	263.275	985.182	1038.57	1172.23	372.08	462.748	526.083	334.085	212.953	235.093	384.117	299.679
pgaptmp_003280	pgaptmp_003280	pgaptmp_003280	protein_coding	protein_coding	pgaptmp_003280	0.4526	285				TRUE	-1.2777	4.38137e-05	0.000896847	Chromosome_II	15509	15793	285	-	8.13044	80.9469	110.895	114.356	260.728	238.955	339.763	193.039	179.111	177.347	468.177	469.857	457.59	353.499	359.619	353.078	761.817	620.482	554.332	223.524	217.271	298.251	11.7034	16.0808	16.7477	49.2841	43.3527	58.3532	32.2502	27.3096
pgaptmp_005115	pgaptmp_005115	pgaptmp_005115	protein_coding	protein_coding	pgaptmp_005115	0.4029	546	GO:0006355	GO:0003677,GO:0003700		TRUE	-1.09852	4.38193e-05	0.000896847	Chromosome_II	2084521	2085066	546	+	8.63401	232.048	247.313	249.95	461.238	445.14	513.769	369.744	325.386	325.137	498.447	480.742	500.2	427.145	361.839	389.966	461.809	426.082	343.977	577.81	491.885	438.653	17.5123	18.7196	19.1074	45.509	42.1548	46.0583	32.2434	25.8966
pgaptmp_004547	pgaptmp_004547	pgaptmp_004547	protein_coding	protein_coding	pgaptmp_004547	0.4423	1257	GO:0003333			TRUE	-1.36848	4.55182e-05	0.000928006	Chromosome_II	1429819	1431075	1257	+	10.0705	483.369	584.398	598.737	1346.56	1264.41	1649.34	1358.7	1114.97	1166.13	1343.99	1393.25	1263.47	771.807	904.598	927.488	1215.2	1050.56	1107.34	1679.22	1313.82	1121.55	15.8453	19.2139	19.8812	57.7104	52.0114	64.2254	51.466	38.5447
pgaptmp_003305	pgaptmp_003305	pgaptmp_003305	protein_coding	protein_coding	pgaptmp_003305	0.439	246				TRUE	-1.31589	4.58854e-05	0.000931881	Chromosome_II	41583	41828	246	+	10.7454	696.914	1089.58	795.593	1721.96	1330.64	2673.58	2107.09	1168.7	1534.9	2857.49	2242.25	2645.5	1246.08	1246.46	1329.31	3648.97	2250.24	2435.62	2196.12	1947.79	1998.03	116.735	183.049	134.989	377.095	279.685	531.974	407.832	206.446
pgaptmp_004361	pgaptmp_004361	pgaptmp_004361	protein_coding	protein_coding	pgaptmp_004361	0.4615	156				TRUE	-1.15502	4.65403e-05	0.000938676	Chromosome_II	1225561	1225716	156	-	7.23618	69.383	89.7719	67.797	162.715	121.526	164.934	116.566	66.4205	101.341	314.809	279.375	300.12	153.183	154.281	143.602	274.726	199.726	186.541	148.085	179.678	180.28	18.3268	23.7825	18.1396	56.1909	40.2799	51.7509	35.5778	18.5018
pgaptmp_001032	pgaptmp_001032	uvrB	protein_coding	protein_coding	pgaptmp_001032	0.4673	2031	GO:0006289	GO:0003677,GO:0005515,GO:0005524,GO:0016787,GO:0016887	GO:0009380	TRUE	1.05774	4.65769e-05	0.000938676	Chromosome_I	1094054	1096084	2031	+	11.6598	4988.64	4455.15	4098.04	2053.79	2373.17	1680.67	2188.76	3190.42	2762.26	3547.65	3515.77	3720	5918.17	5204.49	5503	3347.27	3818.76	3998.07	1860.28	2081.59	2268.86	101.212	90.6555	84.2184	54.4767	60.4174	40.5048	51.3123	68.2615
pgaptmp_000358	pgaptmp_000358	uvrA	protein_coding	protein_coding	pgaptmp_000358	0.4818	2823	GO:0006289	GO:0003677,GO:0005524,GO:0016887		TRUE	1.03078	4.68338e-05	0.000940252	Chromosome_I	384521	387343	2823	-	11.8016	5209.9	4773.75	4276.93	1623.3	1709.55	1500.07	1899.95	2262.78	2260.48	5640.32	5340.77	5368.81	7619.38	8362.26	8330.26	4063.59	4569.73	5363.4	2234.68	2031.89	2395.97	76.046	69.8861	63.2356	30.978	31.3124	26.0096	32.0452	34.8312
pgaptmp_003648	pgaptmp_003648	pgaptmp_003648	protein_coding	protein_coding	pgaptmp_003648	0.4503	1359	GO:0009966	GO:0009975		TRUE	-1.14933	4.73888e-05	0.000947776	Chromosome_II	404216	405574	1359	+	8.58587	243.612	299.24	347.97	402.943	339.317	403.263	572.435	472.407	529.931	337.007	324.728	344.582	256.287	319.662	271.395	367.425	319.561	357.207	554.34	670.29	682.072	7.38647	9.1	10.6872	15.9731	12.9101	14.5245	20.0558	15.1055
pgaptmp_001694	pgaptmp_001694	pgaptmp_001694	protein_coding	protein_coding	pgaptmp_001694	0.4107	1731	GO:0000160			TRUE	0.874054	4.77574e-05	0.00095153	Chromosome_I	1790866	1792596	1731	-	11.1895	3764.42	4096.94	3673.29	3279.28	2748.67	2111.98	2568.16	3019.52	3060.65	1987.73	1260.81	1713.65	2820.63	3339.8	2771.92	1459.59	1339.49	1209.21	1961.42	1883.44	2151.72	89.6105	97.8148	88.5725	102.058	82.1049	59.7207	70.6411	75.8016
pgaptmp_003596	pgaptmp_003596	pgaptmp_003596	protein_coding	protein_coding	pgaptmp_003596	0.444	1374				TRUE	-1.07645	4.84019e-05	0.000958894	Chromosome_II	346381	347754	1374	+	9.26888	420.924	396.933	380.643	746.309	852.046	562.424	469.975	550.022	577.787	694.193	761.931	674.343	564.126	740.328	557.283	655.634	633.797	616.513	717.512	748.023	978.661	12.6234	11.9391	11.563	29.2615	32.0642	20.0359	16.2863	17.3952
pgaptmp_004999	pgaptmp_004999	pgaptmp_004999	protein_coding	protein_coding	pgaptmp_004999	0.4639	582		GO:0005509		TRUE	-0.954788	4.84916e-05	0.000958894	Chromosome_II	1952564	1953145	582	-	5.50273	34.6915	35.2047	34.3069	64.7015	60.0802	66.7982	54.1994	64.1816	64.0421	36.3241	45.353	29.6415	23.5666	42.1776	21.0793	42.1359	22.6356	43.6586	68.7337	69.4501	74.7703	2.45617	2.49988	2.46036	5.98901	5.33768	5.6179	4.43409	4.79209
pgaptmp_003430	pgaptmp_003430	pgaptmp_003430	protein_coding	protein_coding	pgaptmp_003430	0.4486	477				TRUE	-1.21244	4.9044e-05	0.000966186	Chromosome_II	176043	176519	477	+	6.52403	37.0043	44.886	55.5445	101.216	118.795	136.07	101.717	94.7798	105.564	108.972	97.9626	90.777	66.2811	59.9366	72.46	121.351	137.145	144.206	106.733	119.786	103.848	3.19663	3.88896	4.86031	11.4313	12.8773	13.963	10.1533	8.63446
pgaptmp_001934	pgaptmp_001934	pgaptmp_001934	protein_coding	protein_coding	pgaptmp_001934	0.398	588				TRUE	1.30108	4.97144e-05	0.000975738	Chromosome_I	2085229	2085816	588	-	10.0902	4183.03	5429.44	5141.13	3317.07	2674.93	4102.73	6025.04	4267.33	4682.11	163.458	174.156	146.355	167.912	154.281	126.476	830.92	591.189	259.306	2168.74	1944.6	1551.9	293.138	381.61	364.941	303.908	235.223	341.529	487.883	315.367
pgaptmp_001535	pgaptmp_001535	pgaptmp_001535	protein_coding	protein_coding	pgaptmp_001535	0.4094	381				TRUE	0.92031	5.02858e-05	0.000983284	Chromosome_I	1592583	1592963	381	+	7.32879	282.929	286.038	335.717	238.947	206.867	190.498	223.48	205.232	286.43	133.188	74.379	62.9881	119.306	92.1247	61.9203	254.501	154.455	100.547	137.467	146.546	162.002	30.5992	31.027	36.7782	33.7863	28.0744	24.4737	27.9284	23.4076
pgaptmp_005256	pgaptmp_005256	speF	protein_coding	protein_coding	pgaptmp_005256	0.4649	2181	GO:0006520	GO:0004586		TRUE	-1.18393	5.06897e-05	0.00098751	Chromosome_II	2234718	2236898	2181	-	7.53466	288.325	271.956	218.911	226.135	206.867	204.518	357.864	287.325	292.764	108.972	78.0072	74.1036	82.4832	65.4862	98.809	124.722	101.194	95.2552	496.782	576.627	648.84	5.44735	5.15329	4.1894	5.58568	4.90433	4.58995	7.8126	5.72473
pgaptmp_003733	pgaptmp_003733	pgaptmp_003733	protein_coding	protein_coding	pgaptmp_003733	0.4682	534				TRUE	-1.14714	5.34543e-05	0.00103753	Chromosome_II	491602	492135	534	+	8.84605	341.519	376.69	464.777	742.465	688.191	891.467	772.898	956.754	789.618	236.106	361.01	279.741	220.937	154.281	139.65	451.697	415.43	400.866	725.894	937.896	854.874	26.3531	29.1531	36.3282	74.903	66.6364	81.714	68.915	77.8568
pgaptmp_004203	pgaptmp_004203	pgaptmp_004203	protein_coding	protein_coding	pgaptmp_004203	0.4154	609	GO:0000160			TRUE	-1.39344	5.42124e-05	0.00104191	Chromosome_II	1052932	1053540	609	-	7.74294	141.85	162.822	166.633	288.274	288.795	390.893	280.649	231.352	256.168	191.71	174.156	174.144	162.021	114.323	100.126	225.848	191.737	132.299	512.429	365.728	330.651	9.59775	11.0493	11.4205	25.5007	24.5197	31.4176	21.9421	16.508
pgaptmp_000749	pgaptmp_000749	pgaptmp_000749	protein_coding	protein_coding	pgaptmp_000749	0.4912	855	GO:0055085	GO:0015267		TRUE	1.27456	5.432e-05	0.00104191	Chromosome_I	786000	786854	855	-	7.49997	309.911	270.196	232.797	179.37	173.413	169.057	190.812	200.008	169.606	193.728	321.1	142.65	125.198	177.59	177.856	185.398	185.079	268.567	86.0568	117.237	105.509	14.9358	13.0603	11.3645	11.3018	10.4872	9.67832	10.626	10.1653
pgaptmp_002119	pgaptmp_002119	pgaptmp_002119	protein_coding	protein_coding	pgaptmp_002119	0.5088	1710				TRUE	0.959472	5.43289e-05	0.00104191	Chromosome_I	2303167	2304876	1710	-	8.92038	383.149	332.684	418.217	178.089	266.264	305.952	277.679	302.997	269.54	692.175	800.028	789.204	1721.84	1374.1	1410.99	1110.7	1163.74	1172.17	181.054	184.776	179.449	9.23271	8.0404	10.2081	5.61055	8.05121	8.7577	7.73178	7.6998
pgaptmp_001177	pgaptmp_001177	pgaptmp_001177	protein_coding	protein_coding	pgaptmp_001177	0.4444	243				TRUE	0.903831	5.44725e-05	0.00104191	Chromosome_I	1253948	1254190	243	-	7.6656	454.073	392.532	416.584	406.786	324.296	211.115	288.816	277.623	316.692	131.17	116.104	70.3985	113.414	144.292	96.1741	178.656	135.814	125.684	207.319	212.811	214.342	76.9978	66.7591	71.5545	90.1829	69.0049	42.5252	56.591	49.6462
pgaptmp_004167	pgaptmp_004167	pgaptmp_004167	protein_coding	protein_coding	pgaptmp_004167	0.3668	747				TRUE	-1.01887	5.55722e-05	0.00105909	Chromosome_II	1008198	1008944	747	+	7.81024	172.687	186.585	178.886	325.429	324.296	324.919	298.468	258.965	338.508	185.656	206.81	179.701	179.695	157.611	135.698	185.398	122.499	158.759	385.579	365.091	307.389	9.52569	10.3228	9.99532	23.4693	22.4474	21.2906	19.0243	15.0646
pgaptmp_004163	pgaptmp_004163	tssJ	protein_coding	protein_coding	pgaptmp_004163	0.4351	501	GO:0033103	GO:0003674		TRUE	-1.80295	5.68949e-05	0.00108039	Chromosome_II	1003903	1004403	501	+	4.22347	10.022	7.04093	10.6188	16.6558	15.7028	9.89602	20.7888	19.4037	26.7429	10.09	36.2824	9.26295	11.7833	23.3087	17.1269	13.4835	21.3041	13.2299	39.1167	36.9551	72.278	0.82428	0.58081	0.884665	1.79099	1.62063	0.966843	1.97572	1.683
pgaptmp_003614	pgaptmp_003614	pgaptmp_003614	protein_coding	protein_coding	pgaptmp_003614	0.4649	1011		GO:0015288	GO:0009279	TRUE	-1.01955	5.71261e-05	0.00108088	Chromosome_II	362787	363797	1011	+	5.91555	32.3788	36.0848	37.5742	81.9979	62.8111	77.5188	63.1089	64.9279	70.376	60.5401	36.2824	55.5777	61.8624	87.685	73.7774	57.3048	58.5863	48.9506	81.0275	75.1846	69.7856	1.31968	1.47508	1.55124	4.36934	3.2124	3.75309	2.97216	2.79073
pgaptmp_003743	pgaptmp_003743	pgaptmp_003743	protein_coding	protein_coding	pgaptmp_003743	0.4484	765				TRUE	-0.908751	5.83524e-05	0.00110012	Chromosome_II	500069	500833	765	-	8.45905	346.144	405.734	406.782	746.309	616.505	769.416	689	641.816	651.681	135.206	181.412	194.522	97.2123	154.281	193.666	193.825	207.715	254.014	753.835	646.078	688.718	18.6446	21.919	22.1943	52.5559	41.6696	49.2303	42.8836	36.4575
pgaptmp_004850	pgaptmp_004850	pgaptmp_004850	protein_coding	protein_coding	pgaptmp_004850	0.4622	753	GO:0006810	GO:0015291		TRUE	-1.44705	5.93023e-05	0.00111404	Chromosome_II	1774563	1775315	753	+	7.9193	269.052	238.512	240.148	465.722	513.413	272.141	322.226	429.868	392.698	183.638	145.13	150.06	73.6457	124.313	100.126	170.229	103.857	108.485	519.693	583.636	892.259	14.7231	13.0905	13.3115	33.3193	35.2546	17.6901	20.3751	24.8072
pgaptmp_005112	pgaptmp_005112	pgaptmp_005112	protein_coding	protein_coding	pgaptmp_005112	0.422	1083				TRUE	-0.990862	6.01747e-05	0.0011264	Chromosome_II	2081989	2083071	1083	-	7.04095	70.154	73.9298	76.7821	154.387	134.498	142.668	187.842	175.38	159.05	119.062	159.643	87.0718	139.927	107.664	114.618	187.083	167.77	160.082	150.879	156.741	130.433	2.66921	2.82119	2.95919	7.67972	6.42141	6.44807	8.25841	7.03702
pgaptmp_002215	pgaptmp_002215	ruvB	protein_coding	protein_coding	pgaptmp_002215	0.4726	1005	GO:0006281,GO:0006310	GO:0003677,GO:0005524,GO:0009378		TRUE	0.820196	6.10405e-05	0.00113651	Chromosome_I	2397284	2398288	1005	-	10.5418	2343.61	2165.09	2321.43	1089.68	1261	905.486	1174.57	1260.5	1311.1	1951.41	2273.09	2362.05	2182.86	1941.28	2096.07	810.694	1065.2	1022.67	1170.15	1233.54	1278.57	96.0896	89.033	96.412	58.4111	64.8774	44.101	55.6474	54.5021
pgaptmp_004571	pgaptmp_004571	pgaptmp_004571	protein_coding	protein_coding	pgaptmp_004571	0.4583	168				TRUE	-1.18831	6.1147e-05	0.00113651	Chromosome_II	1457818	1457985	168	+	7.36199	57.0483	63.3684	59.6287	107.622	152.249	244.927	97.2619	73.8835	78.1173	447.997	487.999	435.359	285.745	143.182	181.809	352.256	300.92	312.225	168.202	125.52	122.956	13.9924	15.5885	14.8145	34.511	46.8585	71.3607	27.5655	19.1107
pgaptmp_005070	pgaptmp_005070	pgaptmp_005070	protein_coding	protein_coding	pgaptmp_005070	0.4836	519				TRUE	-1.41192	6.21412e-05	0.00115093	Chromosome_II	2033259	2033777	519	-	6.44166	26.9823	35.2047	31.0396	109.544	84.6584	112.155	81.6703	41.0464	89.3775	98.8822	61.6801	83.3666	119.306	74.3657	88.2694	247.759	283.611	216.97	74.3218	78.3704	121.294	2.14225	2.80333	2.49626	11.3707	8.43426	10.5775	7.49255	3.43673
pgaptmp_001876	pgaptmp_001876	pgaptmp_001876	protein_coding	protein_coding	pgaptmp_001876	0.4732	1344				TRUE	-0.813466	6.26036e-05	0.00115495	Chromosome_I	2010696	2012039	1344	+	8.416	242.07	235.871	252.401	172.964	261.485	206.992	185.614	149.26	158.346	720.427	881.663	1044.86	397.687	438.425	694.298	296.637	348.855	428.648	426.931	395.038	417.883	7.42163	7.253	7.83849	6.933	10.0599	7.53853	6.57575	4.82592
pgaptmp_003929	pgaptmp_003929	pgaptmp_003929	protein_coding	protein_coding	pgaptmp_003929	0.41	522				TRUE	-1.15034	6.27977e-05	0.00115495	Chromosome_II	700821	701342	522	+	10.3022	794.821	1058.78	1107.62	1971.79	1570.28	2180.42	1701.71	1379.9	1558.83	1178.51	928.83	1235.68	667.23	867.97	774.663	1164.64	934.717	960.49	2355.94	1980.92	1928.24	62.7418	83.8257	88.565	203.496	155.543	204.458	155.22	114.872
pgaptmp_001854	pgaptmp_001854	pgaptmp_001854	protein_coding	protein_coding	pgaptmp_001854	0.4326	141				TRUE	-1.05109	6.35464e-05	0.00116465	Chromosome_I	1983543	1983683	141	-	10.4187	973.675	1008.61	864.207	1220.36	869.797	1392.87	991.181	877.646	926.148	2246.04	1688.95	2058.23	1181.28	1511.73	1529.56	1786.56	1663.05	1709.3	1840.16	1603.09	2223.17	284.547	295.629	255.823	466.265	318.965	483.529	334.708	270.482
pgaptmp_002613	pgaptmp_002613	tet(34)	protein_coding	protein_coding	pgaptmp_002613	0.4516	465				TRUE	-0.992793	6.59763e-05	0.00120321	Chromosome_I	2821313	2821777	465	-	11.0097	1086.23	1482.12	1360.84	1855.84	1484.94	2456.69	1729.18	1137.36	1264.66	2235.95	2699.41	2552.87	1973.7	2030.07	2130.32	3824.25	4041.12	3423.9	2556	2281.02	2626.93	96.2558	131.726	122.15	215.007	165.12	258.601	177.06	106.287
pgaptmp_003409	pgaptmp_003409	pgaptmp_003409	protein_coding	protein_coding	pgaptmp_003409	0.4575	588	GO:0055085		GO:0016020	TRUE	-1.15009	6.63099e-05	0.00120321	Chromosome_II	152001	152588	588	-	8.13838	127.973	165.462	153.564	221.651	250.562	399.964	265.057	221.65	193.534	377.367	411.806	513.168	315.204	285.254	357.03	301.693	376.816	330.747	376.079	308.384	282.466	8.96809	11.6295	10.9007	20.3075	22.0334	33.2948	21.4632	16.3806
pgaptmp_001996	pgaptmp_001996	vmeI	protein_coding	protein_coding	pgaptmp_001996	0.4553	3108				TRUE	0.950323	6.66457e-05	0.00120321	Chromosome_I	2160824	2163931	3108	-	11.2309	2776.09	2326.15	2420.27	1134.52	1357.95	1432.45	1508.67	1870.22	1705.21	3035.08	2975.16	3134.58	6685.56	5723.94	5564.93	3070.86	4142.31	4113.17	1136.06	1243.73	1331.74	36.8054	30.9313	32.503	19.665	22.5916	22.5596	23.1125	26.1487
pgaptmp_004417	pgaptmp_004417	pgaptmp_004417	protein_coding	protein_coding	pgaptmp_004417	0.4021	189				TRUE	-1.45907	6.66884e-05	0.00120321	Chromosome_II	1286200	1286388	189	+	6.61002	40.088	56.3275	38.391	87.7634	83.293	89.8889	115.823	69.4057	51.3744	181.62	183.226	166.733	67.754	89.9048	88.2694	176.971	141.14	129.653	119.585	105.131	167.818	8.73998	12.3169	8.47831	25.0159	22.7872	23.2797	29.1788	15.9577
pgaptmp_003861	pgaptmp_003861	pgaptmp_003861	protein_coding	protein_coding	pgaptmp_003861	0.4432	1356				TRUE	-1.13987	6.67943e-05	0.00120321	Chromosome_II	627466	628821	1356	+	6.47227	37.7752	56.3275	53.9108	78.1542	81.2448	95.6616	80.1854	82.0928	93.6	110.99	76.1931	131.534	145.818	105.444	133.063	62.3611	85.2164	88.6403	117.909	105.131	112.155	1.1479	1.71673	1.65942	3.10497	3.09799	3.45311	2.81558	2.63077
pgaptmp_001776	pgaptmp_001776	pgaptmp_001776	protein_coding	protein_coding	pgaptmp_001776	0.4633	4377				TRUE	1.07796	6.81442e-05	0.00122334	Chromosome_I	1874752	1879128	4377	+	9.774	1587.33	1329.86	1244.85	597.047	638.352	533.561	701.622	819.435	781.877	1109.9	1380.55	1217.15	869.019	1088.85	1027.61	802.267	734.991	964.459	598.486	565.159	713.641	14.9434	12.5565	11.8708	7.34846	7.54098	5.96678	7.63237	8.13533
pgaptmp_004853	pgaptmp_004853	pgaptmp_004853	protein_coding	protein_coding	pgaptmp_004853	0.4736	870				TRUE	-1.52152	6.88157e-05	0.00123119	Chromosome_II	1776450	1777319	870	+	9.04309	417.069	317.722	345.519	772.574	871.163	447.795	356.38	579.127	561.6	819.309	952.414	724.363	428.618	437.315	403.141	244.388	287.605	310.902	761.099	930.887	1329.25	19.7536	15.0928	16.5766	47.8393	51.7755	25.1937	19.5041	28.9262
pgaptmp_003768	pgaptmp_003768	pgaptmp_003768	protein_coding	protein_coding	pgaptmp_003768	0.4206	1020				TRUE	0.98756	6.94911e-05	0.00123906	Chromosome_II	521995	523014	1020	+	5.89208	134.141	158.421	130.693	53.8111	58.032	70.9215	54.1994	44.0316	52.782	52.4681	39.9107	35.1992	32.4041	21.0888	44.7934	60.6757	55.9232	76.7334	64.822	67.5387	59.8163	5.41899	6.41881	5.34802	2.84208	2.94179	3.40338	2.53004	1.87586
pgaptmp_001494	pgaptmp_001494	pgaptmp_001494	protein_coding	protein_coding	pgaptmp_001494	0.4607	675		GO:0003700		TRUE	0.855564	7.01723e-05	0.00124698	Chromosome_I	1544072	1544746	675	-	8.81743	912.773	1018.3	868.291	647.655	578.955	582.216	929.557	847.794	911.369	181.62	244.906	240.837	220.937	204.228	247.681	332.031	323.556	275.182	462.695	502.717	500.13	55.7208	62.3464	53.6911	51.6897	44.3491	42.2195	65.5699	54.5788
pgaptmp_001731	pgaptmp_001731	pgaptmp_001731	protein_coding	protein_coding	pgaptmp_001731	0.4689	2043				TRUE	0.885224	7.06079e-05	0.00124841	Chromosome_I	1829799	1831841	2043	-	8.43612	513.435	466.462	447.623	319.664	339.999	277.089	334.106	322.401	351.176	532.753	553.307	511.315	377.066	359.619	358.347	220.792	251.655	283.12	232.465	250.403	245.081	10.3556	9.43603	9.14503	8.42925	8.60505	6.6387	7.78661	6.85749
pgaptmp_003872	pgaptmp_003872	pgaptmp_003872	protein_coding	protein_coding	pgaptmp_003872	0.4506	648		GO:0016787,GO:0046872		TRUE	-1.45914	7.07276e-05	0.00124841	Chromosome_II	638510	639157	648	-	10.4094	588.985	660.088	743.316	1276.73	1280.8	2097.13	1202.04	947.052	902.923	1408.57	1427.71	1398.71	1449.35	1388.53	1662.63	2723.66	2410.03	2005.65	2226.86	1654.7	1348.36	37.4531	42.0987	47.8784	106.142	102.2	158.41	88.3235	63.5091
pgaptmp_001647	pgaptmp_001647	pgaptmp_001647	protein_coding	protein_coding	pgaptmp_001647	0.4484	1104				TRUE	1.05664	7.11623e-05	0.00125189	Chromosome_I	1720083	1721186	1104	-	7.34974	379.294	371.409	413.316	258.806	275.823	222.661	272.482	300.758	344.138	100.9	68.9366	68.5459	85.429	59.9366	89.5869	112.924	105.189	71.4414	163.731	203.253	153.695	14.1568	13.9035	15.6262	12.629	12.9183	9.87204	11.7517	11.8382
pgaptmp_004967	pgaptmp_004967	pgaptmp_004967	protein_coding	protein_coding	pgaptmp_004967	0.3748	555				TRUE	-0.981085	7.27648e-05	0.00127581	Chromosome_II	1899953	1900507	555	+	5.75867	38.5461	44.0058	43.292	85.2009	70.3211	108.032	69.0485	41.0464	56.3008	72.6481	47.1672	29.6415	39.7687	38.8478	27.6665	58.9902	35.9507	38.3667	90.5272	87.9277	78.0935	2.86184	3.27687	3.25579	8.27019	6.55144	9.52775	5.92372	3.2138
pgaptmp_004893	pgaptmp_004893	pgaptmp_004893	protein_coding	protein_coding	pgaptmp_004893	0.4464	513	GO:0015031		GO:0005886	TRUE	-1.07785	7.32742e-05	0.00127789	Chromosome_II	1829743	1830255	513	+	7.951	324.558	311.561	334.084	492.628	451.967	294.407	266.542	280.608	259.687	171.53	214.066	179.701	98.6852	129.863	105.396	119.666	111.846	116.423	759.423	532.026	686.225	26.0696	25.0997	27.1818	51.7328	45.5547	28.0907	24.739	23.7695
pgaptmp_003519	pgaptmp_003519	pgaptmp_003519	protein_coding	protein_coding	pgaptmp_003519	0.4359	429				TRUE	-1.4472	7.33691e-05	0.00127789	Chromosome_II	272090	272518	429	+	7.04367	71.6958	91.5322	91.4851	203.714	180.241	230.907	172.993	114.93	128.788	90.8102	114.29	144.502	78.0644	83.2452	80.3647	175.285	123.83	109.808	301.757	186.687	206.865	6.88644	8.81775	8.9009	25.5815	21.724	26.3459	19.2001	11.6416
pgaptmp_003678	pgaptmp_003678	pgaptmp_003678	protein_coding	protein_coding	pgaptmp_003678	0.4853	1257	GO:0009401			TRUE	1.21683	7.39546e-05	0.00127975	Chromosome_II	434951	436207	1257	-	10.2873	4193.82	3648.08	3192.17	1807.16	2171.08	2002.3	2209.55	2998.62	2498.35	345.079	847.195	574.303	469.859	270.824	325.411	615.184	615.156	1878.64	1237.21	1659.79	1632.49	137.478	119.942	105.997	77.4506	89.3068	77.9697	83.6955	103.663
pgaptmp_002664	pgaptmp_002664	pgaptmp_002664	protein_coding	protein_coding	pgaptmp_002664	0.4768	1269	GO:0019346	GO:0016765,GO:0030170		TRUE	1.01323	7.41048e-05	0.00127975	Chromosome_I	2882852	2884120	1269	-	8.75623	650.659	608.161	632.227	481.097	516.826	464.288	624.407	717.192	755.134	355.169	333.798	350.14	352.026	303.013	355.713	389.336	396.789	362.499	264.876	340.879	275.819	21.1276	19.8061	20.7947	20.4237	21.0585	17.9085	23.4282	24.559
pgaptmp_000571	pgaptmp_000571	pgaptmp_000571	protein_coding	protein_coding	pgaptmp_000571	0.4286	924				TRUE	1.06724	7.42062e-05	0.00127975	Chromosome_I	580182	581105	924	+	11.1634	4632.47	4380.34	4480.32	2746.29	2920.03	1526.46	3195.54	3972.54	3596.21	1628.53	1610.94	1734.03	2141.62	2379.7	2238.35	1112.39	1203.68	1256.84	1656.31	2081.59	2410.1	206.585	195.919	202.385	160.117	163.403	80.8624	164.666	186.825
pgaptmp_004443	pgaptmp_004443	pgaptmp_004443	protein_coding	protein_coding		0.5	1000				TRUE	-1.86929	7.44994e-05	0.00128061	pgaptmp_004443	1	1000	1000	+	7.48896	100.22	140.819	117.624	383.084	271.726	356.257	211.6	144.782	162.568	300.683	128.803	257.51	70.6999	106.554	106.714	141.577	82.5534	93.9322	535.899	482.328	274.989	4.12964	5.81972	4.90948	20.6376	14.05	17.438	10.0751	6.29146
pgaptmp_004045	pgaptmp_004045	pgaptmp_004045	protein_coding	protein_coding	pgaptmp_004045	0.4157	267				TRUE	-1.07101	7.52716e-05	0.00128628	Chromosome_II	813217	813483	267	+	6.61002	43.1717	48.4064	35.9406	97.3725	99.6785	136.895	126.218	77.615	81.6361	185.656	107.033	172.291	88.3748	95.4545	69.8251	185.398	113.178	178.604	96.6742	93.6621	88.0628	6.66263	7.49261	5.61842	19.6467	19.3034	25.0963	22.5083	12.632
pgaptmp_000088	pgaptmp_000088	pgaptmp_000088	protein_coding	protein_coding	pgaptmp_000088	0.4721	1002	GO:0006006	GO:0016620,GO:0050661,GO:0051287		TRUE	1.45222	7.53184e-05	0.00128628	Chromosome_I	95523	96524	1002	+	8.21091	652.972	483.184	538.292	140.293	191.847	108.856	181.16	218.665	199.164	219.962	268.49	216.753	600.949	551.638	575.727	443.27	497.983	534.488	139.144	214.085	220.157	26.8525	19.9291	22.4228	7.54281	9.89991	5.31763	8.60848	9.48308
pgaptmp_002082	pgaptmp_002082	trpS	protein_coding	protein_coding	pgaptmp_002082	0.4545	1023	GO:0006436	GO:0000166,GO:0004830,GO:0005524		TRUE	1.07245	7.66604e-05	0.00130496	Chromosome_I	2252361	2253383	1023	-	9.29684	1218.83	1462.75	1536.46	705.951	772.85	512.119	857.538	908.991	927.555	486.339	607.731	494.642	369.701	346.3	382.062	385.965	395.457	382.344	640.396	707.245	544.162	49.0936	59.0932	62.6883	37.176	39.0628	24.5035	39.9127	38.6119
pgaptmp_001262	pgaptmp_001262	pgaptmp_001262	protein_coding	protein_coding	pgaptmp_001262	0.4407	540				TRUE	0.835993	7.77457e-05	0.00131917	Chromosome_I	1348447	1348986	540	+	7.61076	522.686	559.754	586.485	337.601	327.027	266.368	524.917	537.334	526.412	32.2881	87.0778	74.1036	86.9019	91.0148	98.809	79.2155	61.2493	74.0874	290.022	311.57	278.312	39.8846	42.8396	45.3319	33.6801	31.3137	24.1447	46.2839	43.2403
pgaptmp_001906	pgaptmp_001906	pgaptmp_001906	protein_coding	protein_coding	pgaptmp_001906	0.4589	231				TRUE	0.951654	7.99759e-05	0.00135265	Chromosome_I	2048397	2048627	231	+	7.08447	329.955	396.933	375.742	213.323	202.771	342.237	357.122	217.919	242.093	46.4141	48.9813	48.1674	47.1332	41.0676	35.5713	91.0135	97.1999	97.9012	184.966	187.961	157.848	58.8574	71.0144	67.892	49.7496	45.3876	72.5184	73.6101	40.994
pgaptmp_002812	pgaptmp_002812	pgaptmp_002812	protein_coding	protein_coding	pgaptmp_002812	0.4782	1470				TRUE	0.988859	8.04626e-05	0.00135431	Chromosome_I	3050176	3051645	1470	+	10.2631	1727.64	1447.79	1495.62	820.62	968.793	912.908	1009.74	1062.73	997.227	1685.03	1494.84	1296.81	1671.76	1951.27	1736.4	1934.88	1480.63	1177.46	816.422	717.439	700.349	48.4277	40.7034	42.4663	30.0738	34.0767	30.3978	32.7059	31.4154
pgaptmp_000040	pgaptmp_000040	pgaptmp_000040	protein_coding	protein_coding	pgaptmp_000040	0.4468	282				TRUE	-1.02745	8.05894e-05	0.00135431	Chromosome_I	44259	44540	282	+	10.6993	799.447	1096.63	883.811	1470.2	1262.37	1968.48	1039.44	734.357	924.036	2966.47	2668.57	2576.95	1490.59	1882.45	1670.53	3820.88	2814.8	3566.78	1887.1	1600.54	1933.23	116.815	160.713	130.813	280.86	231.462	341.677	175.502	113.161
pgaptmp_002113	pgaptmp_002113	pgaptmp_002113	protein_coding	protein_coding	pgaptmp_002113	0.409	423				TRUE	1.11289	8.1608e-05	0.00136706	Chromosome_I	2296106	2296528	423	+	8.1797	457.157	515.748	510.519	383.084	285.381	376.874	269.512	195.53	238.574	500.465	359.196	342.729	215.045	230.867	196.301	335.402	235.677	170.666	259.847	184.138	196.064	44.5331	50.3894	50.3747	48.7885	34.8842	43.6102	30.3369	20.0868
pgaptmp_000191	pgaptmp_000191	pgaptmp_000191	protein_coding	protein_coding	pgaptmp_000191	0.4712	486				TRUE	1.12408	8.24482e-05	0.0013731	Chromosome_I	208319	208804	486	-	7.51368	373.127	402.213	455.792	205.635	184.337	198.745	338.561	263.443	280.096	62.5581	56.2378	70.3985	154.656	167.6	168.634	182.027	139.808	149.498	159.82	210.262	154.525	31.6358	34.2028	39.1445	22.7943	19.6119	20.0167	33.169	23.5553
pgaptmp_003691	pgaptmp_003691	pgaptmp_003691	protein_coding	protein_coding	pgaptmp_003691	0.4485	912				TRUE	-1.03566	8.26658e-05	0.0013731	Chromosome_II	448748	449659	912	-	8.39171	296.805	287.798	299.777	391.412	421.244	366.153	438.792	489.571	523.597	256.286	317.471	398.307	213.572	149.841	169.952	252.815	267.633	260.629	499.576	537.124	721.949	13.4102	13.0417	13.7197	23.1208	23.8827	19.6517	22.9085	23.327
pgaptmp_004160	pgaptmp_004160	pgaptmp_004160	protein_coding	protein_coding	pgaptmp_004160	0.423	1305				TRUE	-1.2609	8.28252e-05	0.0013731	Chromosome_II	999859	1001163	1305	-	5.83793	52.4227	48.4064	42.4752	88.404	79.8793	89.8889	86.8675	75.3761	88.6737	38.3421	43.5389	29.6415	20.6208	34.408	15.8094	62.3611	45.2712	51.5966	145.849	101.308	109.663	1.65526	1.53297	1.35852	3.64943	3.16496	3.37154	3.16942	2.50992
pgaptmp_002100	pgaptmp_002100	pgaptmp_002100	protein_coding	protein_coding	pgaptmp_002100	0.4746	1260				TRUE	1.07821	8.33645e-05	0.0013731	Chromosome_I	2276252	2277511	1260	-	5.84955	135.682	126.737	124.975	66.6233	58.7147	50.3048	74.2457	74.6298	80.9323	26.234	30.8401	37.0518	44.1874	36.6279	27.6665	60.6757	54.5917	47.6276	46.9401	64.3529	52.3392	4.43722	4.15694	4.13994	2.84852	2.40946	1.95421	2.80565	2.57383
pgaptmp_005237	pgaptmp_005237	pgaptmp_005237	protein_coding	protein_coding	pgaptmp_005237	0.4976	828		GO:0016853		TRUE	-0.958227	8.38959e-05	0.0013731	Chromosome_II	2215018	2215845	828	-	5.8861	16.9603	20.2427	19.6039	42.2802	48.4738	18.9674	25.986	31.3445	31.6692	108.972	125.174	127.829	113.414	120.983	113.301	160.116	225.024	207.709	40.7931	42.0524	42.3699	0.844037	1.01037	0.988221	2.75087	3.02706	1.12127	1.49431	1.64501
pgaptmp_000499	pgaptmp_000499	pgaptmp_000499	protein_coding	protein_coding	pgaptmp_000499	0.4524	126				TRUE	2.47917	8.40273e-05	0.0013731	Chromosome_I	516431	516556	126	+	6.70107	286.012	154.901	227.896	22.4213	29.3574	18.1427	14.1067	17.9111	28.1504	353.151	529.723	431.654	399.16	301.903	316.189	251.13	254.318	343.977	40.2343	14.6546	43.2006	93.5346	50.8071	75.493	9.58638	12.0473	7.04798	5.33074	6.17718
pgaptmp_004852	pgaptmp_004852	pgaptmp_004852	protein_coding	protein_coding	pgaptmp_004852	0.4517	414		GO:0022857	GO:0016020	TRUE	-1.80146	8.42804e-05	0.0013731	Chromosome_II	1776010	1776423	414	+	7.48242	118.722	80.9708	104.554	241.509	290.16	178.953	110.626	162.693	158.346	228.034	337.427	214.901	151.71	133.192	139.65	160.116	119.836	134.945	280.523	279.075	517.577	11.8165	8.08294	10.541	31.4266	36.2394	21.1579	12.723	17.0768
pgaptmp_004218	pgaptmp_004218	pgaptmp_004218	protein_coding	protein_coding	pgaptmp_004218	0.3987	459		GO:0016746,GO:0120225		TRUE	-0.896503	8.43161e-05	0.0013731	Chromosome_II	1068531	1068989	459	+	7.98096	185.021	217.389	208.292	360.022	358.433	409.036	267.285	208.217	261.799	240.142	266.676	250.1	231.247	173.15	208.158	180.342	199.726	171.989	393.961	368.277	336.466	16.6099	19.5734	18.9409	42.2552	40.3775	43.6196	27.7264	19.7125
pgaptmp_001021	pgaptmp_001021	pgaptmp_001021	protein_coding	protein_coding	pgaptmp_001021	0.4322	435				TRUE	-1.02155	8.43904e-05	0.0013731	Chromosome_I	1082278	1082712	435	-	9.99208	715.416	763.941	810.296	1105.05	986.544	1425.85	611.042	688.833	661.534	1321.79	1315.24	1178.25	792.428	893.499	889.281	1360.15	1315.53	1022.67	1721.14	1422.14	1296.02	67.7685	72.5792	77.7491	136.854	117.266	160.442	66.8829	68.8117
pgaptmp_000819	pgaptmp_000819	pgaptmp_000819	protein_coding	protein_coding	pgaptmp_000819	0.4583	384				TRUE	0.897216	8.45862e-05	0.0013731	Chromosome_I	863232	863615	384	-	10.2831	2498.56	2735.4	3179.11	1795.63	1643.33	2325.57	2585.24	2232.18	2221.77	581.185	624.058	502.052	679.013	544.979	562.553	822.493	817.545	701.184	1384.73	1514.52	1386.57	268.112	294.396	345.553	251.912	221.278	296.435	320.554	252.601
pgaptmp_004687	pgaptmp_004687	pgaptmp_004687	protein_coding	protein_coding	pgaptmp_004687	0.4128	642				TRUE	-1.51188	8.48397e-05	0.0013731	Chromosome_II	1601259	1601900	642	+	6.92871	41.6298	45.7661	42.4752	131.325	140.642	200.394	97.2619	67.1668	83.0436	223.998	183.226	192.669	116.36	140.962	135.698	259.557	190.405	181.249	175.466	111.503	103.017	2.67195	2.94612	2.76148	11.0199	11.3273	15.2786	7.21341	4.54629
pgaptmp_001895	pgaptmp_001895	pgaptmp_001895	protein_coding	protein_coding	pgaptmp_001895	0.4592	882		GO:0051539,GO:1904047		TRUE	0.952474	8.56557e-05	0.00138205	Chromosome_I	2035977	2036858	882	-	9.23326	1024.56	927.643	807.029	586.157	598.754	489.853	637.771	674.653	672.794	433.871	491.627	503.905	453.657	488.372	523.029	701.141	680.4	1088.82	454.871	445.373	451.114	47.8658	43.4664	38.191	35.8022	35.1013	27.185	34.4293	33.2391
pgaptmp_003972	pgaptmp_003972	codB	protein_coding	protein_coding	pgaptmp_003972	0.4722	1239	GO:0055085	GO:0015209	GO:0016020	TRUE	-0.97158	8.75223e-05	0.00140604	Chromosome_II	737789	739027	1239	-	8.04651	149.559	133.778	117.624	194.745	245.783	175.654	118.793	138.065	170.31	488.357	409.991	414.98	497.845	641.543	648.187	348.885	374.153	318.84	245.876	268.243	257.542	4.97393	4.46225	3.96245	8.46758	10.2571	6.93938	4.56513	4.84228
pgaptmp_004681	pgaptmp_004681	rbsD	protein_coding	protein_coding	pgaptmp_004681	0.4476	420		GO:0016872		TRUE	1.98887	8.7677e-05	0.00140604	Chromosome_II	1594576	1594995	420	-	6.42553	575.879	413.655	307.128	177.449	129.719	150.09	325.196	283.593	303.32	14.126	56.2378	27.7889	19.1479	14.4292	15.8094	42.1359	22.6356	44.9816	67.0572	111.503	120.463	56.499	40.7034	30.5219	22.7608	15.9697	17.4918	36.8663	29.3416
pgaptmp_001719	pgaptmp_001719	pgaptmp_001719	protein_coding	protein_coding	pgaptmp_001719	0.4777	1053	GO:0009061	GO:0008863,GO:0009055	GO:0009326	TRUE	1.48061	8.81968e-05	0.00141008	Chromosome_I	1814537	1815589	1053	-	11.0402	3971.02	2989.76	2682.47	1663.02	2274.17	1726.86	2018	3219.53	2914.97	5287.17	6314.96	5752.3	2526.05	2018.97	1986.72	734.85	985.314	867.881	890.185	1028.37	1389.07	155.393	117.341	106.328	85.0811	111.671	80.2713	91.2484	132.862
pgaptmp_001662	pgaptmp_001662	pgaptmp_001662	protein_coding	protein_coding	pgaptmp_001662	0.4645	1029		GO:0042626,GO:0140359	GO:0055052	TRUE	1.01865	8.91754e-05	0.00142102	Chromosome_I	1748103	1749131	1029	-	6.41943	148.788	183.064	177.252	115.31	102.409	97.3109	111.369	136.573	128.788	58.5221	59.866	59.2829	58.9165	55.4968	96.1741	42.1359	62.5808	35.7207	70.4101	66.9015	92.2167	5.95814	7.35241	7.18981	6.0369	5.14598	4.62891	5.15324	5.76747
pgaptmp_001511	pgaptmp_001511	pgaptmp_001511	protein_coding	protein_coding	pgaptmp_001511	0.471	690	GO:0000160,GO:0006355	GO:0000156,GO:0003677		TRUE	0.790178	8.94217e-05	0.00142102	Chromosome_I	1563970	1564659	690	+	7.17031	221.255	255.234	245.866	201.151	182.971	108.032	184.129	236.576	227.314	127.134	134.245	96.3347	128.143	190.909	144.92	53.9339	89.2109	54.2426	128.526	124.246	136.248	13.213	15.2873	14.8727	15.705	13.7113	7.66363	12.7059	14.8991
pgaptmp_001703	pgaptmp_001703	ccoS	protein_coding	protein_coding	pgaptmp_001703	0.3879	165	GO:0008535			TRUE	0.761903	9.05357e-05	0.00143439	Chromosome_I	1800666	1800830	165	+	8.81182	656.055	680.33	650.197	429.208	520.24	456.866	610.3	585.844	501.077	361.223	507.954	298.267	405.051	371.829	413.681	385.965	330.213	416.742	378.873	359.994	368.867	163.838	170.403	164.476	140.135	163.029	135.531	176.113	154.289
pgaptmp_004693	pgaptmp_004693	pgaptmp_004693	protein_coding	protein_coding		0.5	1000				TRUE	-1.7977	9.14258e-05	0.00144414	pgaptmp_004693	1	1000	1000	+	9.48097	403.964	619.602	304.678	1525.93	1034.34	1161.96	734.29	486.586	630.569	716.391	645.827	481.674	368.228	665.962	466.379	873.056	541.923	690.6	1676.43	1503.69	1260.3	16.6456	25.6068	12.7169	82.2051	53.4817	56.8752	34.9623	21.1445
pgaptmp_001850	pgaptmp_001850	pgaptmp_001850	protein_coding	protein_coding	pgaptmp_001850	0.4474	1578	GO:0006508	GO:0008236		TRUE	0.977167	9.17235e-05	0.00144451	Chromosome_I	1980283	1981860	1578	+	7.70908	453.303	373.17	355.321	245.353	232.811	239.979	309.605	345.536	318.099	113.008	116.104	129.681	156.129	147.622	98.809	242.703	187.742	148.175	181.613	186.687	195.234	11.8369	9.77329	9.39843	8.37623	7.62851	7.44386	9.34186	9.51532
pgaptmp_003401	pgaptmp_003401	pgaptmp_003401	protein_coding	protein_coding	pgaptmp_003401	0.4663	519	GO:0006352,GO:0006355	GO:0003700,GO:0016987		TRUE	-1.29742	9.33236e-05	0.00146532	Chromosome_II	143481	143999	519	-	5.04518	13.8766	22.0029	15.5198	34.5929	34.1365	42.0581	23.7586	19.4037	28.1504	24.216	39.9107	33.3466	38.2958	32.1882	28.984	62.3611	30.6246	46.3046	40.2343	53.5212	58.1547	1.10173	1.75208	1.24813	3.59074	3.40091	3.96657	2.17965	1.62463
pgaptmp_004895	pgaptmp_004895	pgaptmp_004895	protein_coding	protein_coding	pgaptmp_004895	0.4493	612		GO:0031992	GO:0016020	TRUE	-1.13569	9.48799e-05	0.00147692	Chromosome_II	1830672	1831283	612	+	7.00816	194.273	147.86	182.97	318.382	262.168	103.908	100.974	148.513	144.271	98.8822	130.617	87.0718	27.9854	76.5856	55.3331	60.6757	70.5698	55.5655	340.874	334.508	456.93	13.0803	9.98481	12.4787	28.0261	22.1499	8.31058	7.85582	10.5451
pgaptmp_005000	pgaptmp_005000	pgaptmp_005000	protein_coding	protein_coding	pgaptmp_005000	0.344	657	GO:0006355			TRUE	-1.36609	9.48801e-05	0.00147692	Chromosome_II	1953352	1954008	657	-	6.5858	47.7972	76.5702	51.4603	139.653	141.325	142.668	116.566	101.497	97.1188	100.9	128.803	74.1036	128.143	79.9154	46.1109	87.6426	65.2438	59.5345	169.319	162.475	130.433	2.99775	4.81655	3.26925	11.4511	11.1224	10.629	8.4477	6.7131
pgaptmp_003862	pgaptmp_003862	pgaptmp_003862	protein_coding	protein_coding	pgaptmp_003862	0.4229	1317		GO:0016757		TRUE	-1.25721	9.4905e-05	0.00147692	Chromosome_II	628808	630124	1317	+	6.1781	23.1277	39.6053	34.3069	62.139	62.8111	75.0448	45.2899	59.7038	52.0782	82.7381	101.591	133.387	128.143	94.3446	81.6821	106.182	79.8904	119.069	92.2037	77.096	79.755	0.72361	1.24282	1.08727	2.54181	2.46601	2.78912	1.63738	1.96994
pgaptmp_003933	pgaptmp_003933	pgaptmp_003933	protein_coding	protein_coding	pgaptmp_003933	0.4417	600				TRUE	-0.777037	9.6852e-05	0.00150278	Chromosome_II	703952	704551	600	-	8.95261	402.422	461.181	414.95	709.154	839.757	656.436	544.221	508.975	614.382	351.133	393.664	385.339	424.199	401.797	393.919	380.908	387.468	404.835	670.013	709.793	723.611	27.6368	31.766	28.8659	63.6727	72.368	53.5518	43.1874	36.8623
pgaptmp_004313	pgaptmp_004313	pgaptmp_004313	protein_coding	protein_coding	pgaptmp_004313	0.4514	906				TRUE	-0.936108	9.73224e-05	0.00150564	Chromosome_II	1169173	1170078	906	+	10.1854	611.342	708.494	817.648	1586.79	1573.69	2239.8	1136.7	834.361	875.477	1341.97	1257.19	1074.5	1203.37	1087.74	898.504	1808.47	1512.59	1137.77	1382.5	1297.25	1225.4	27.8044	32.3184	37.6686	94.3528	89.8122	121.008	59.7381	40.0187
pgaptmp_004252	pgaptmp_004252	pgaptmp_004252	protein_coding	protein_coding	pgaptmp_004252	0.381	231				TRUE	-0.990942	9.78357e-05	0.00150899	Chromosome_II	1103001	1103231	231	+	6.81927	94.8235	110.895	104.554	203.714	204.136	192.972	193.781	117.915	133.714	76.6841	52.6095	98.1873	82.4832	120.983	77.7298	45.5068	54.5917	62.1805	234.7	179.041	193.572	16.9146	19.8399	18.8917	47.5086	45.6932	40.8899	39.9423	22.1817
pgaptmp_002814	pgaptmp_002814	pgaptmp_002814	protein_coding	protein_coding	pgaptmp_002814	0.4947	1413		GO:0016491		TRUE	0.910125	9.81133e-05	0.00150899	Chromosome_I	3056582	3057994	1413	+	9.10886	548.126	462.941	562.796	258.165	270.361	303.478	284.361	359.716	342.027	782.985	682.11	687.311	1754.24	1567.23	1563.82	947.215	1185.04	1078.24	257.053	278.438	252.558	15.9844	13.5402	16.6246	9.84283	9.8934	10.5128	9.5821	11.0625
pgaptmp_003891	pgaptmp_003891	pgaptmp_003891	protein_coding	protein_coding	pgaptmp_003891	0.4913	1437				TRUE	1.64971	9.84629e-05	0.00150975	Chromosome_II	659739	661175	1437	-	8.52581	978.301	1005.09	539.925	235.103	245.1	192.972	389.79	454.495	424.367	320.863	366.453	337.172	430.091	358.509	363.617	326.974	363.501	399.543	253.141	226.828	275.819	28.0527	28.9062	15.6826	8.81386	8.81922	6.57312	12.9154	13.7439
pgaptmp_004877	pgaptmp_004877	pgaptmp_004877	protein_coding	protein_coding	pgaptmp_004877	0.4711	537				TRUE	-0.969792	9.87367e-05	0.00150975	Chromosome_II	1810384	1810920	537	+	5.50065	33.9206	29.924	34.3069	58.2954	47.1083	47.8308	53.4569	55.226	55.597	50.4501	58.0519	48.1674	29.4583	34.408	39.5236	35.3941	30.6246	25.1368	60.3515	68.813	75.6011	2.60284	2.30296	2.66654	5.84822	4.53594	4.35979	4.73983	4.46897
pgaptmp_004548	pgaptmp_004548	pgaptmp_004548	protein_coding	protein_coding	pgaptmp_004548	0.4313	1776	GO:0009966	GO:0009975		TRUE	-0.756317	0.000100077	0.00152582	Chromosome_II	1431842	1433617	1776	+	11.0215	2157.04	2345.51	2406.38	4051.85	3773.45	3042.2	3370.76	3744.18	3635.62	1354.08	1128.38	1309.78	1050.19	1425.16	1333.26	1029.8	950.695	899.633	3730.06	3508.19	3900.52	50.0465	54.5803	56.5539	122.906	109.86	83.8451	90.3685	91.6117
pgaptmp_000111	pgaptmp_000111	pgaptmp_000111	protein_coding	protein_coding	pgaptmp_000111	0.4881	795				TRUE	-0.893701	0.000100683	0.00153062	Chromosome_I	116286	117080	795	+	10.4712	1204.95	1386.18	1493.17	1677.11	1648.11	1809.32	1236.93	1264.97	1163.31	1093.76	1532.93	1307.93	1035.46	1041.12	1024.98	1321.38	1336.83	1141.74	2519.12	2502.12	2207.39	62.4541	72.0602	78.3939	113.647	107.192	111.399	74.0819	69.1436
pgaptmp_002463	pgaptmp_002463	pgaptmp_002463	protein_coding	protein_coding	pgaptmp_002463	0.4684	792				TRUE	0.973478	0.00010156	0.0015395	Chromosome_I	2679082	2679873	792	-	7.85568	467.179	491.105	520.321	249.837	361.847	321.621	453.641	442.555	435.627	100.9	101.591	90.777	197.37	157.611	191.031	114.61	113.178	148.175	203.966	274.615	227.634	24.3062	25.6266	27.4213	16.994	23.6234	19.877	27.2722	24.2817
pgaptmp_000232	pgaptmp_000232	pgaptmp_000232	protein_coding	protein_coding	pgaptmp_000232	0.4562	1416	GO:0006820	GO:0008509	GO:0016020	TRUE	0.901741	0.00010273	0.00155058	Chromosome_I	251546	252961	1416	-	9.83308	2454.62	2366.63	2500.32	1475.96	1446.02	1426.68	2169.46	2120.98	2181.65	290.593	361.01	320.498	371.174	391.808	329.363	460.124	455.375	497.444	1113.71	1406.84	1202.97	71.4297	69.0732	73.701	56.1534	52.8026	49.3168	72.9493	65.0894
pgaptmp_001857	pgaptmp_001857	pgaptmp_001857	protein_coding	protein_coding	pgaptmp_001857	0.492	498				TRUE	1.26421	0.000102968	0.00155058	Chromosome_I	1988600	1989097	498	-	5.58589	161.123	128.497	104.554	88.404	96.9476	89.0642	50.4871	107.467	91.4887	28.252	30.8401	25.9363	5.89165	18.8689	34.2538	32.0233	25.2986	17.1989	43.0284	50.3354	51.5085	13.3317	10.6636	8.76302	9.56328	10.0659	8.754	4.82707	9.37741
pgaptmp_004952	pgaptmp_004952	pgaptmp_004952	protein_coding	protein_coding	pgaptmp_004952	0.4438	534				TRUE	-0.797866	0.000103176	0.00155058	Chromosome_II	1884262	1884795	534	+	7.2033	98.6781	114.415	114.356	155.668	141.325	205.342	193.039	126.871	147.789	133.188	192.297	140.797	106.05	139.852	115.936	151.689	139.808	166.697	187.201	176.493	194.403	7.61444	8.85491	8.9384	15.7044	13.6843	18.8222	17.2122	10.3242
pgaptmp_003742	pgaptmp_003742	pgaptmp_003742	protein_coding	protein_coding	pgaptmp_003742	0.4687	798		GO:0016779		TRUE	-0.945979	0.000104076	0.00155965	Chromosome_II	499135	499932	798	-	8.5871	292.18	266.675	263.02	537.471	494.979	357.082	360.092	439.569	437.738	393.511	331.984	372.371	374.12	478.383	454.522	281.468	288.937	320.163	435.313	558.787	538.346	15.0871	13.8109	13.7571	36.2841	32.0721	21.9027	21.4854	23.9366
pgaptmp_004353	pgaptmp_004353	pgaptmp_004353	protein_coding	protein_coding	pgaptmp_004353	0.4167	384				TRUE	-0.752151	0.000105034	0.00156954	Chromosome_II	1219301	1219684	384	+	10.5488	1147.13	1162.63	1213.81	2302.35	1747.79	1442.35	1708.39	1653.8	1850.18	1275.38	1054	1106	1293.22	1660.46	1389.91	1525.32	1579.17	1352.09	1910.57	1733.07	2033.75	123.095	125.128	131.935	323.001	235.343	183.853	211.831	187.149
pgaptmp_002810	pgaptmp_002810	pgaptmp_002810	protein_coding	protein_coding	pgaptmp_002810	0.4677	945		GO:0051536,GO:1904047		TRUE	0.896433	0.000105518	0.00157052	Chromosome_I	3044127	3045071	945	-	9.85626	3563.98	4254.48	4381.48	3774.47	3429.35	2756.04	2652.06	2652.34	2591.24	197.764	194.111	205.638	187.06	219.767	229.237	182.027	195.731	190.51	1920.07	2272.74	2030.43	155.404	186.062	193.522	215.173	187.639	142.754	133.624	121.965
pgaptmp_002735	pgaptmp_002735	pgaptmp_002735	protein_coding	protein_coding		0.5	1000				TRUE	-1.29936	0.000105697	0.00157052	pgaptmp_002735	1	1000	1000	+	11.7381	1384.58	1618.53	1719.43	2363.2	2572.52	3625.24	1709.88	1187.36	1315.33	16620.3	9103.26	9768.71	3583.6	4013.53	3696.78	7159.73	5098.34	5143.78	4555.42	3611.41	2884.47	57.0526	66.8904	71.7671	127.311	133.016	177.448	81.4138	51.5964
pgaptmp_005060	pgaptmp_005060	pgaptmp_005060	protein_coding	protein_coding	pgaptmp_005060	0.4834	993				TRUE	-0.842996	0.000106343	0.00157567	Chromosome_II	2023380	2024372	993	+	8.33686	228.964	260.515	228.713	434.973	380.28	363.679	331.136	356.73	367.362	316.827	234.022	261.215	273.962	277.484	276.665	310.12	339.534	435.263	376.079	443.462	425.36	9.50115	10.8424	9.61351	23.5981	19.8015	17.9268	15.8778	15.6109
pgaptmp_003393	pgaptmp_003393	exbD	protein_coding	protein_coding	pgaptmp_003393	0.463	432	GO:0055085	GO:0015291	GO:0016020	TRUE	-0.921479	0.00010745	0.0015876	Chromosome_II	132360	132791	432	-	5.41902	20.8149	22.0029	23.6881	46.7644	36.1847	44.5321	63.1089	55.9723	54.1895	36.3241	45.353	38.9044	39.7687	43.2875	59.2854	50.5631	37.2822	55.5655	43.0284	45.8753	50.6777	1.9854	2.10493	2.28869	5.83171	4.33096	5.04571	6.95568	5.63024
pgaptmp_002070	pgaptmp_002070	ald	protein_coding	protein_coding	pgaptmp_002070	0.4738	1125	GO:0042853	GO:0000286		TRUE	-0.967319	0.000109053	0.00160617	Chromosome_I	2236512	2237636	1125	+	13.2872	4492.17	5673.23	6007.79	12456	12247.5	11648.4	14495.7	15444.6	14540.4	8717.78	8205.27	8481.16	11046.9	10788.6	10955.9	11594.1	10938.3	11054.9	9697.03	10497.2	9884.64	164.536	208.411	222.896	596.472	562.909	506.813	613.508	596.572
pgaptmp_003677	pgaptmp_003677	pgaptmp_003677	protein_coding	protein_coding	pgaptmp_003677	0.4959	363				TRUE	-1.15575	0.000109373	0.00160617	Chromosome_II	434396	434758	363	+	7.43828	99.449	90.652	120.074	180.011	210.281	277.913	242.784	213.441	186.496	137.224	234.022	264.921	156.129	128.753	150.19	133.149	154.455	138.914	256.494	237.023	188.587	11.2889	10.3208	13.8065	26.7151	29.9527	37.4745	31.8453	25.5511
pgaptmp_002736	pgaptmp_002736	pgaptmp_002736	protein_coding	protein_coding		0.5	1000				TRUE	-1.22488	0.000109804	0.00160617	pgaptmp_002736	1	1000	1000	+	13.0115	3415.96	4183.2	4147.87	5990.97	5429.06	8692.01	4234.23	2776.97	2985.35	32288.1	17107.2	24294.9	9087.88	11192.6	9971.81	20609.5	12759.8	13440.2	10106.1	9045.72	6914.59	140.757	172.882	173.127	322.746	280.717	425.454	201.608	120.673
pgaptmp_004261	pgaptmp_004261	pgaptmp_004261	protein_coding	protein_coding	pgaptmp_004261	0.3491	570				TRUE	-1.35288	0.000109928	0.00160617	Chromosome_II	1109687	1110256	570	-	6.16699	28.5241	47.5263	56.3613	116.591	96.2648	120.402	103.944	65.6742	80.9323	40.3601	56.2378	70.3985	58.9165	58.8266	61.9203	70.7883	53.2602	58.2115	116.233	117.874	119.633	2.06203	3.44589	4.12712	11.0193	8.73246	10.3393	8.68275	5.00677
pgaptmp_003284	pgaptmp_003284	pgaptmp_003284	protein_coding	protein_coding	pgaptmp_003284	0.4433	591	GO:0006355	GO:0003677,GO:0003700		TRUE	-1.03619	0.000110764	0.00161079	Chromosome_II	20503	21093	591	-	9.76707	480.285	572.076	578.316	961.553	882.769	1843.96	1438.88	1055.27	997.931	359.205	284.817	402.012	989.798	651.533	930.122	1791.62	1764.25	1550.54	1255.09	1004.16	938.783	33.4865	40.0044	40.8431	87.6496	77.2331	152.72	115.923	77.591
pgaptmp_002654	pgaptmp_002654	pgaptmp_002654	protein_coding	protein_coding	pgaptmp_002654	0.4905	1368			GO:0016020	TRUE	-0.800688	0.000111539	0.00161079	Chromosome_I	2872758	2874125	1368	+	10.5111	608.258	718.175	742.499	1016.01	1000.88	1204.02	803.339	749.283	674.905	2819.15	3084.01	3418.03	2135.72	1828.07	2313.45	3830.99	3425.96	3204.28	1178.53	1147.52	1117.4	18.3215	21.6963	22.6543	40.0105	37.8304	43.0803	27.9605	23.8011
pgaptmp_002129	pgaptmp_002129	pgaptmp_002129	protein_coding	protein_coding	pgaptmp_002129	0.4655	333				TRUE	-1.35735	0.00011165	0.00161079	Chromosome_I	2314858	2315190	333	-	7.07487	214.317	266.675	269.554	500.956	345.461	294.407	507.841	286.578	331.471	34.3061	36.2824	31.494	22.0937	32.1882	23.7142	40.4505	46.6027	37.0437	735.953	435.178	695.364	26.5198	33.0964	33.7865	81.0437	53.6412	43.2749	72.6133	37.397
pgaptmp_003731	pgaptmp_003731	pgaptmp_003731	protein_coding	protein_coding	pgaptmp_003731	0.4397	423				TRUE	-1.11542	0.000111657	0.00161079	Chromosome_II	488737	489159	423	+	9.00106	269.052	292.199	349.604	595.125	518.874	769.416	614.755	394.045	488.409	595.311	533.352	670.638	368.228	346.3	380.744	921.933	599.178	701.184	760.541	553.69	585.701	26.2092	28.5483	34.4966	75.7936	63.4258	89.0335	69.1981	40.4802
pgaptmp_004273	pgaptmp_004273	pgaptmp_004273	protein_coding	protein_coding	pgaptmp_004273	0.4614	726	GO:0006355	GO:0003677,GO:0003700		TRUE	-1.0157	0.000111776	0.00161079	Chromosome_II	1122965	1123690	726	-	9.92598	510.351	597.599	651.014	1087.75	933.974	1213.91	890.949	630.622	661.534	1228.96	1090.29	1128.23	1041.35	1170.98	1264.76	1193.29	1414.06	1071.62	1275.76	1138.6	982.814	28.9661	34.0185	37.4278	80.7157	66.5184	81.8434	58.4317	37.7459
pgaptmp_002240	pgaptmp_002240	glgC	protein_coding	protein_coding	pgaptmp_002240	0.4483	1218	GO:0005978	GO:0008878		TRUE	0.949007	0.000113668	0.00163359	Chromosome_I	2425994	2427211	1218	-	9.33315	1168.72	973.409	929.554	655.983	774.215	620.151	705.334	838.092	799.471	532.753	585.961	500.2	537.614	500.581	438.712	712.939	581.868	632.389	467.165	494.434	550.808	39.5386	33.0286	31.8543	29.0141	32.8669	24.922	27.5728	29.9008
pgaptmp_003396	pgaptmp_003396	pgaptmp_003396	protein_coding	protein_coding	pgaptmp_003396	0.4504	726				TRUE	-1.04896	0.000114504	0.00164112	Chromosome_II	135353	136078	726	-	5.74644	30.066	34.3246	33.4901	76.873	68.9557	75.0448	65.3362	61.9427	49.2632	50.4501	39.9107	31.494	54.4978	44.3975	55.3331	74.1592	42.6082	52.9196	83.2627	59.8928	72.278	1.70646	1.95393	1.9254	5.70429	4.91108	5.05961	4.28499	3.70758
pgaptmp_000216	pgaptmp_000216	frdD	protein_coding	protein_coding	pgaptmp_000216	0.4735	378				TRUE	1.32323	0.000119582	0.00170924	Chromosome_I	234765	235142	378	-	10.0115	2243.39	1779.6	1393.51	1101.21	1097.83	880.746	1216.15	1802.31	1460.3	789.039	627.686	600.239	751.186	1078.86	992.043	1218.57	1098.49	980.335	612.456	662.644	789.242	244.551	194.568	153.872	156.943	150.171	114.049	153.189	207.193
pgaptmp_005190	pgaptmp_005190	pgaptmp_005190	protein_coding	protein_coding	pgaptmp_005190	0.4676	1482				TRUE	-0.847469	0.000119955	0.00170993	Chromosome_II	2160058	2161539	1482	+	7.64425	91.7398	101.213	111.089	149.262	144.056	126.174	98.0044	125.378	151.308	300.683	284.817	257.51	424.199	430.655	490.093	291.58	371.49	293.704	191.113	162.475	184.433	2.55075	2.82248	3.1287	5.42581	5.02605	4.16731	3.14869	3.6763
pgaptmp_005302	pgaptmp_005302	pgaptmp_005302	protein_coding	protein_coding	pgaptmp_005302	0.4884	774				TRUE	-0.731401	0.000120788	0.00171356	Chromosome_II	2288747	2289520	774	+	9.4936	854.953	920.602	960.593	1219.08	1186.58	1005.27	1654.19	1611.26	1629.91	304.719	402.735	351.992	435.982	385.148	379.427	269.67	284.942	326.778	1354.56	1433.6	1557.72	45.5155	49.1556	51.8012	84.8506	79.2686	63.5733	101.76	90.461
pgaptmp_004956	pgaptmp_004956	pgaptmp_004956	protein_coding	protein_coding	pgaptmp_004956	0.4071	678				TRUE	-0.991857	0.000120861	0.00171356	Chromosome_II	1888878	1889555	678	+	10.4669	1201.1	1448.67	1569.95	2049.31	1715.7	2183.72	2782.73	1906.79	2300.59	1170.44	1135.64	1030.04	699.634	746.987	804.964	834.291	822.871	767.334	3029.31	2539.71	2421.73	72.9973	88.3044	96.6489	162.833	130.844	157.652	195.422	122.211
pgaptmp_003667	pgaptmp_003667	yjjG	protein_coding	protein_coding	pgaptmp_003667	0.4711	675		GO:0008253		TRUE	-1.06208	0.000122476	0.00172916	Chromosome_II	425702	426376	675	+	9.58084	408.589	491.985	534.207	768.09	817.91	1275.76	722.411	622.412	617.901	952.498	1024.98	1052.27	951.502	618.235	696.933	744.962	768.279	728.967	1103.65	939.17	822.474	24.9426	30.1224	33.0329	61.3017	62.6535	92.5121	50.9581	40.0693
pgaptmp_003428	pgaptmp_003428	pgaptmp_003428	protein_coding	protein_coding	pgaptmp_003428	0.4578	249				TRUE	-1.3451	0.000122619	0.00172916	Chromosome_II	175297	175545	249	+	8.03593	139.537	190.105	214.827	358.1	318.152	365.328	382.366	254.488	307.543	181.62	146.944	187.112	201.789	215.328	212.11	311.806	268.964	246.076	532.546	449.833	358.898	23.0913	31.5527	36.0105	77.4764	66.0662	71.8152	73.1159	44.4124
pgaptmp_003843	pgaptmp_003843	pgaptmp_003843	protein_coding	protein_coding	pgaptmp_003843	0.4625	867	GO:0006355	GO:0003677,GO:0003700		TRUE	-0.814488	0.00012385	0.00174184	Chromosome_II	611364	612230	867	+	7.71662	191.189	188.345	226.262	321.585	286.064	230.907	327.424	317.923	353.991	108.972	134.245	159.323	120.779	139.852	169.952	139.891	158.449	141.56	319.081	342.153	371.359	9.08661	8.97794	10.8927	19.9821	17.0603	13.0362	17.9814	15.9346
pgaptmp_001521	pgaptmp_001521	pgaptmp_001521	protein_coding	protein_coding	pgaptmp_001521	0.4699	1611		GO:0042626,GO:0140359	GO:0055052	TRUE	0.886681	0.00012607	0.00176834	Chromosome_I	1579464	1581074	1611	-	5.95555	104.845	100.333	107.005	79.4355	81.9275	66.7982	79.4429	85.8243	72.4872	44.3961	65.3084	40.757	58.9165	54.3869	34.2538	33.7087	38.6137	59.5345	44.7048	49.0611	58.1547	2.68171	2.5739	2.77235	2.65634	2.62953	2.02956	2.34797	2.315
pgaptmp_001931	pgaptmp_001931	pgaptmp_001931	protein_coding	protein_coding	pgaptmp_001931	0.4534	1941				TRUE	0.92441	0.00012764	0.0017856	Chromosome_I	2081828	2083768	1941	+	9.39462	3222.46	2890.3	2728.22	2158.85	1966.26	1128.97	2503.57	2896.38	2857.97	98.8822	154.2	124.124	163.493	175.37	146.237	131.464	133.151	203.74	1292.53	1475.66	1679.01	68.41	61.5403	58.667	59.9186	52.3793	28.4702	61.4138	64.8437
pgaptmp_005189	pgaptmp_005189	pgaptmp_005189	protein_coding	protein_coding	pgaptmp_005189	0.4412	306				TRUE	-0.986332	0.000130918	0.00181754	Chromosome_II	2159643	2159948	306	-	7.87456	135.682	135.538	120.074	157.59	195.261	142.668	109.884	140.304	137.937	324.899	283.003	301.972	484.589	482.822	463.744	323.604	475.348	357.207	242.524	214.722	306.558	18.2709	18.3055	16.3783	27.7441	32.9942	22.8211	17.098	19.9244
pgaptmp_003931	pgaptmp_003931	pgaptmp_003931	protein_coding	protein_coding	pgaptmp_003931	0.4236	609				TRUE	-1.48797	0.000131091	0.00181754	Chromosome_II	701919	702527	609	-	10.0651	496.474	593.199	697.574	1210.11	1208.43	1900.04	896.146	720.177	735.429	1309.68	1155.6	1320.9	799.792	869.08	992.043	1528.69	1552.54	1248.9	2072.07	1522.17	1189.68	33.5921	40.2554	47.8094	107.046	102.6	152.713	70.0639	51.3878
pgaptmp_002510	pgaptmp_002510	pgaptmp_002510	protein_coding	protein_coding	pgaptmp_002510	0.4615	2652				TRUE	0.703188	0.000131247	0.00181754	Chromosome_I	2729863	2732514	2652	-	9.12445	867.288	914.441	886.261	554.767	618.553	527.788	664.499	695.55	679.128	389.475	424.504	429.801	539.086	453.964	495.363	353.941	460.701	592.699	506.282	523.106	524.223	13.4756	14.2503	13.9486	11.2694	12.06	9.74134	11.9304	11.397
pgaptmp_004217	pgaptmp_004217	pgaptmp_004217	protein_coding	protein_coding	pgaptmp_004217	0.4658	891	GO:0055085	GO:0022857	GO:0016020	TRUE	-0.927635	0.000131305	0.00181754	Chromosome_II	1067499	1068389	891	+	8.37071	193.502	231.471	227.896	423.442	398.714	413.159	303.665	260.458	289.949	419.745	406.363	524.283	381.485	347.41	367.57	235.961	282.279	259.306	453.195	384.843	360.559	8.94881	10.7364	10.6758	25.6024	23.1381	22.6972	16.2274	12.7027
pgaptmp_000231	pgaptmp_000231	pgaptmp_000231	protein_coding	protein_coding	pgaptmp_000231	0.4689	1881	GO:0006935			TRUE	0.830579	0.000131811	0.00181976	Chromosome_I	249387	251267	1881	-	10.5119	2362.11	2521.53	2216.06	1811.64	1947.14	1628.72	1801.2	2336.66	2177.43	1356.1	1409.57	1376.48	706.999	879.07	823.409	1243.85	1081.18	1102.05	1375.23	1139.87	1282.73	51.7451	55.401	49.1738	51.8857	53.5246	42.3829	45.5938	53.9814
pgaptmp_000879	pgaptmp_000879	melR	protein_coding	protein_coding	pgaptmp_000879	0.4471	1011	GO:0006355	GO:0003677,GO:0003700		TRUE	0.9641	0.000132847	0.00182925	Chromosome_I	923539	924549	1011	-	8.196	718.5	680.33	674.702	514.409	457.429	320.796	460.324	457.481	521.486	173.548	159.643	151.912	111.941	134.302	129.11	208.994	185.079	189.187	297.846	391.852	312.374	29.2842	27.8106	27.8549	27.4108	23.3946	15.5314	21.6793	19.6634
pgaptmp_000575	pgaptmp_000575	recA	protein_coding	protein_coding	pgaptmp_000575	0.4655	1044	GO:0006281	GO:0003677,GO:0003697,GO:0005524,GO:0008094		TRUE	0.90823	0.000133252	0.00183004	Chromosome_I	585591	586634	1044	+	13.4307	20939.8	21706.3	22394.2	9674.47	9158.81	7056.69	8464.01	9922.03	9464.86	14224.9	15396.4	16449.2	10085	10050.5	10277.5	6188.92	7548.31	6817.36	9729.44	11166.8	12167.6	826.476	859.266	895.317	499.219	453.61	330.852	386.019	412.988
pgaptmp_003292	pgaptmp_003292	pgaptmp_003292	protein_coding	protein_coding	pgaptmp_003292	0.4622	450				TRUE	-0.879813	0.000133749	0.00183208	Chromosome_II	28722	29171	450	-	6.38087	54.7355	70.4093	68.6138	155.668	146.104	135.246	139.582	85.8243	97.8226	64.5761	52.6095	50.02	63.3353	46.6173	40.8411	91.0135	73.2328	75.4104	110.644	119.786	127.11	5.01204	6.46635	6.36414	18.6359	16.7878	14.711	14.7689	8.28772
pgaptmp_001997	pgaptmp_001997	pgaptmp_001997	protein_coding	protein_coding	pgaptmp_001997	0.454	1086	GO:0055085	GO:0022857,GO:0042802	GO:0016020	TRUE	1.28821	0.000134625	0.00183929	Chromosome_I	2163928	2165013	1086	-	9.3953	1051.54	774.503	700.841	294.68	384.377	277.089	357.864	606.74	536.969	940.39	930.644	1004.1	2007.58	2094.45	1752.21	659.005	834.854	941.968	276.052	321.127	383.821	39.8982	29.4737	26.9358	14.6179	18.3008	12.4888	15.6899	24.2779
pgaptmp_003397	pgaptmp_003397	pgaptmp_003397	protein_coding	protein_coding	pgaptmp_003397	0.4381	1413				TRUE	-0.780658	0.000135197	0.00184232	Chromosome_II	136285	137697	1413	-	8.03844	185.792	207.708	229.529	393.334	377.549	380.997	437.307	344.043	379.326	181.62	150.572	172.291	184.114	221.987	258.221	230.905	213.041	210.355	342.551	350.437	340.62	5.41806	6.07508	6.78012	14.9963	13.8158	13.1981	14.7359	10.5806
pgaptmp_000385	pgaptmp_000385	pgaptmp_000385	protein_coding	protein_coding	pgaptmp_000385	0.4458	489			GO:0005886	TRUE	-0.847626	0.000136162	0.00185068	Chromosome_I	417306	417794	489	+	12.7711	6161.99	7374.5	6902.22	8807.09	6177.34	10325.7	10511	6019.64	7343.03	7038.8	7475.99	7067.63	4642.62	4595.14	4171.06	4936.64	5851.97	4346.02	11557.9	10908.1	12612.9	519.242	623.254	589.143	970.259	653.185	1033.58	1023.45	534.932
pgaptmp_004754	pgaptmp_004754	folE	protein_coding	protein_coding	pgaptmp_004754	0.4664	654	GO:0046654	GO:0003934		TRUE	-0.944212	0.000136895	0.00185584	Chromosome_II	1674535	1675188	654	-	11.3729	1966.62	2264.54	2428.44	3707.84	3464.85	3715.96	2770.11	2362.78	2443.45	2583.04	2590.57	2849.28	2039.99	2480.71	2447.83	1837.12	1818.84	1807.2	4573.3	3990.52	3628.02	123.909	143.101	154.985	305.427	273.937	278.116	201.675	156.994
pgaptmp_003069	pgaptmp_003069	pyrE	protein_coding	protein_coding	pgaptmp_003069	0.4673	642	GO:0009220	GO:0004588		TRUE	-0.721066	0.00013783	0.00186372	Chromosome_I	3319989	3320630	642	-	10.2545	708.478	741.939	722.078	1130.03	1056.18	1232.88	830.81	775.403	722.057	1267.31	1454.93	1561.73	1639.35	1264.22	1488.72	2952.88	2571.14	2517.65	1198.65	1078.71	1149.8	45.4726	47.7611	46.9451	94.8245	85.0644	93.998	61.6168	52.4844
pgaptmp_005089	pgaptmp_005089	pgaptmp_005089	protein_coding	protein_coding	pgaptmp_005089	0.4885	477		GO:0008113		TRUE	-0.757117	0.000138195	0.00186386	Chromosome_II	2050456	2050932	477	+	6.66479	121.806	129.377	133.143	283.79	199.357	228.433	213.085	213.441	194.238	60.5401	21.7695	50.02	47.1332	61.0465	55.3331	37.0796	21.3041	54.2426	193.907	215.359	225.142	10.5222	11.2094	11.6504	32.0511	21.6101	23.4409	21.27	19.4445
pgaptmp_004429	pgaptmp_004429	pgaptmp_004429	protein_coding	protein_coding		0.5	1000				TRUE	-1.64972	0.000140006	0.00188346	pgaptmp_004429	1	1000	1000	+	10.5666	820.262	854.593	1182.77	2233.8	1953.29	2008.07	1000.83	920.932	900.812	2177.43	1975.58	2349.09	755.605	1031.13	1198.88	2199.49	1624.44	1456.61	3713.29	2825.16	1991.38	33.7995	35.3184	49.3676	120.34	100.997	98.2904	47.6534	40.0189
pgaptmp_004083	pgaptmp_004083	pgaptmp_004083	protein_coding	protein_coding	pgaptmp_004083	0.4733	243				TRUE	-1.07743	0.000141509	0.00189882	Chromosome_II	871139	871381	243	+	9.27096	375.439	456.781	477.029	861.619	858.874	1070.42	664.499	550.022	614.382	460.105	482.556	537.251	536.141	513.901	537.521	611.813	619.15	603.283	1004.18	913.046	726.103	63.6637	77.6861	81.9369	191.017	182.754	215.616	130.203	98.3583
pgaptmp_001695	pgaptmp_001695	pgaptmp_001695	protein_coding	protein_coding	pgaptmp_001695	0.4226	1188				TRUE	0.764097	0.000142599	0.00190858	Chromosome_I	1792586	1793773	1188	-	11.6284	5207.58	5440.88	6060.88	4333.08	3806.22	2902.83	4143.65	4180.01	4447.06	2371.15	1872.17	1997.09	2935.52	4166.7	3632.22	1732.63	1589.82	1541.28	3176.28	3094.04	3088.01	180.625	189.276	212.942	196.492	165.661	119.602	166.073	152.897
pgaptmp_000079	pgaptmp_000079	pgaptmp_000079	protein_coding	protein_coding	pgaptmp_000079	0.4757	2487				TRUE	0.919555	0.000144346	0.0019187	Chromosome_I	85815	88301	2487	+	10.6585	2690.52	2449.37	2600.79	1415.1	1542.29	1146.29	1627.47	2003.06	1957.86	789.039	749.232	772.53	2022.31	1809.2	2110.56	2162.41	2282.2	2313.91	1081.86	1436.15	1379.1	44.5778	40.7023	43.6486	30.6533	32.0651	22.5606	31.158	34.9991
pgaptmp_000432	pgaptmp_000432	rraB	protein_coding	protein_coding	pgaptmp_000432	0.4173	417				TRUE	-1.1882	0.000144396	0.0019187	Chromosome_I	466098	466514	417	+	12.0202	1447.02	1835.04	2136.01	2893.63	2639.43	4821.01	2077.4	1353.04	1465.93	8980.12	10280.6	9670.52	6010.96	5313.27	6232.87	12772.2	10156.7	8346.74	4667.74	3603.12	3466.85	142.987	181.866	213.8	373.827	327.279	565.894	237.201	140.997
pgaptmp_001974	pgaptmp_001974	pgaptmp_001974	protein_coding	protein_coding	pgaptmp_001974	0.4672	1815				TRUE	0.828347	0.00014445	0.0019187	Chromosome_I	2133304	2135118	1815	-	7.03813	382.378	437.418	368.391	269.696	255.341	230.907	263.572	241.801	264.614	68.6121	41.7248	35.1992	61.8624	72.1459	40.8411	62.3611	41.2767	34.3977	199.495	193.696	236.773	8.68109	9.96005	8.47175	8.00502	7.27424	6.22721	6.91442	5.78919
pgaptmp_002112	pgaptmp_002112	pgaptmp_002112	protein_coding	protein_coding	pgaptmp_002112	0.3987	627				TRUE	0.974849	0.000145357	0.00192468	Chromosome_I	2295526	2296152	627	+	8.62426	653.742	700.573	767.821	588.079	534.577	633.345	455.126	337.327	375.104	657.869	502.512	359.403	207.681	281.924	196.301	330.345	219.698	206.386	402.343	300.101	313.205	42.9633	46.1772	51.1132	50.528	44.0846	49.4431	34.5619	23.3787
pgaptmp_002078	pgaptmp_002078	pgaptmp_002078	protein_coding	protein_coding	pgaptmp_002078	0.4583	1641			GO:0098561	TRUE	0.912201	0.000145732	0.00192468	Chromosome_I	2246994	2248634	1641	-	7.22396	258.259	321.243	251.584	133.247	118.795	131.947	128.445	92.5409	104.86	143.278	226.765	137.092	119.306	147.622	142.285	141.577	126.493	145.529	146.408	133.803	129.602	6.48493	8.09033	6.39905	4.37433	3.74312	3.93571	3.72685	2.45055
pgaptmp_000297	pgaptmp_000297	bfr	protein_coding	protein_coding	pgaptmp_000297	0.4403	477	GO:0006879,GO:0006880	GO:0004322,GO:0008199		TRUE	-1.05415	0.000146251	0.00192468	Chromosome_I	309674	310150	477	+	9.14739	378.523	296.599	330.816	556.048	538.673	663.034	236.101	219.412	253.353	768.859	702.065	798.467	785.063	734.778	791.79	1156.21	1139.77	859.943	780.658	590.645	645.517	32.6988	25.6977	28.9474	62.7998	58.3917	68.0377	23.5675	19.9884
pgaptmp_002637	pgaptmp_002637	bamE	protein_coding	protein_coding	pgaptmp_002637	0.4278	360				TRUE	-1.00769	0.000146546	0.00192468	Chromosome_I	2854538	2854897	360	+	10.4668	998.345	1200.48	893.613	1759.11	1396.18	1885.19	849.371	664.951	782.581	1783.92	1358.78	1650.66	1087.01	1459.57	1312.18	2472.53	2146.39	1943.47	2207.3	1729.24	2013.81	114.271	137.814	103.607	263.242	200.532	256.322	112.338	80.2647
pgaptmp_003451	pgaptmp_003451	pgaptmp_003451	protein_coding	protein_coding	pgaptmp_003451	0.4476	1278				TRUE	-0.840025	0.000146729	0.00192468	Chromosome_II	199992	201269	1278	-	7.10412	89.427	94.1725	93.1187	160.793	156.345	169.057	181.902	163.439	146.382	102.918	165.085	125.976	120.779	125.423	115.936	148.318	127.825	157.436	169.878	170.758	147.048	2.88334	3.04533	3.04121	6.77797	6.32553	6.47493	6.77703	5.55729
pgaptmp_003886	pgaptmp_003886	pgaptmp_003886	protein_coding	protein_coding	pgaptmp_003886	0.4733	300	GO:0009401,GO:0016310	GO:0016301,GO:0022877,GO:0090563,GO:0090582		TRUE	0.755441	0.000147963	0.00193305	Chromosome_II	654461	654760	300	-	8.36352	640.637	720.816	615.89	788.589	698.432	578.917	1139.67	920.932	993.708	115.026	125.174	120.418	91.3206	164.271	114.618	143.262	135.814	246.076	358.756	365.728	383.821	87.9931	99.2989	85.6886	141.61	120.378	94.4557	180.88	133.396
pgaptmp_003741	pgaptmp_003741	pgaptmp_003741	protein_coding	protein_coding	pgaptmp_003741	0.4026	231	GO:0006355			TRUE	-1.11406	0.000148103	0.00193305	Chromosome_II	498491	498721	231	+	6.494	47.0263	65.1286	44.9257	107.622	113.333	93.1876	46.7748	73.8835	68.9684	167.494	121.546	124.124	66.2811	101.004	93.5392	89.3281	99.8629	108.485	106.733	130.617	110.494	8.38855	11.652	8.11753	25.0989	25.3681	19.746	9.64124	13.8987
pgaptmp_000754	pgaptmp_000754	pgaptmp_000754	protein_coding	protein_coding	pgaptmp_000754	0.4834	693				TRUE	0.854505	0.000149775	0.00195004	Chromosome_I	792961	793653	693	-	8.82588	766.297	935.564	847.87	542.595	628.111	282.037	531.599	544.797	711.501	341.043	406.363	331.614	337.297	419.556	339.903	298.322	267.633	321.486	409.049	492.523	430.345	45.564	55.7933	51.0666	42.1801	46.8648	19.9207	36.5245	34.1617
pgaptmp_004801	pgaptmp_004801	pgaptmp_004801	protein_coding	protein_coding	pgaptmp_004801	0.4	315				TRUE	-0.951977	0.000150226	0.00195108	Chromosome_II	1727740	1728054	315	-	6.34404	42.4008	41.3655	41.6584	112.106	81.2448	94.0122	70.5334	40.3001	56.3008	145.296	121.546	151.912	72.1728	72.1459	68.5076	151.689	93.2054	121.715	78.2334	73.2731	101.355	5.54653	5.42712	5.51992	19.1728	13.3361	14.6085	10.6615	5.55946
pgaptmp_000241	pgaptmp_000241	pgaptmp_000241	protein_coding	protein_coding		0.5	1000				TRUE	-1.03832	0.000151071	0.00195344	pgaptmp_000241	1	1000	1000	+	11.6849	990.636	1135.35	1190.94	1240.86	1918.47	2576.26	1021.62	936.604	855.772	11793.2	16296.3	14100.1	9691.77	5810.52	7072.09	12303.7	9917.06	8379.81	2625.85	1924.85	1944.86	40.8199	46.9215	49.7085	66.8477	99.1971	126.102	48.6433	40.6999
pgaptmp_004301	pgaptmp_004301	pgaptmp_004301	protein_coding	protein_coding	pgaptmp_004301	0.4444	1755				TRUE	-0.77898	0.00015115	0.00195344	Chromosome_II	1156874	1158628	1755	+	10.3667	1046.14	1167.03	1153.37	2246.61	2131.48	2181.25	1504.96	1440.35	1518.71	1132.1	983.254	1228.27	1132.67	1159.88	1345.12	682.601	826.865	826.868	1964.22	1840.11	1705.59	24.5625	27.482	27.4303	68.9629	62.7984	60.836	40.8301	35.664
pgaptmp_002575	pgaptmp_002575	treB	protein_coding	protein_coding	pgaptmp_002575	0.4842	1425	GO:0009401,GO:0015771	GO:0008982,GO:0015574	GO:0016020	TRUE	1.05615	0.000151838	0.00195751	Chromosome_I	2780525	2781949	1425	-	13.6335	27221.3	25280.5	25447.5	13137.6	14133.2	13189.7	27303.9	27477.2	26283.3	3035.08	5068.66	3645.9	4907.75	4148.94	4891.71	19544.3	18874.1	53180.2	9700.94	12868.7	13241	787.14	733.182	745.37	496.667	512.825	453.059	912.309	837.905
pgaptmp_004947	pgaptmp_004947	pgaptmp_004947	protein_coding	protein_coding	pgaptmp_004947	0.4646	1608				TRUE	-1.21321	0.000153016	0.00196788	Chromosome_II	1878734	1880341	1608	+	11.0537	891.958	851.073	912.4	1777.05	1986.06	2271.96	1121.11	1297.07	1281.55	3979.5	3978.37	3734.82	3487.86	3310.94	3483.35	3409.64	3355.39	3721.57	2143.04	2264.46	1464.67	22.8569	21.8737	23.6832	59.5357	63.8631	69.1589	33.1967	35.052
pgaptmp_003663	pgaptmp_003663	pgaptmp_003663	protein_coding	protein_coding	pgaptmp_003663	0.4481	183				TRUE	-1.24309	0.000153808	0.00197109	Chromosome_II	423274	423456	183	-	11.0119	2234.13	3384.05	2611.41	5375.99	4150.31	5648.16	9591.81	4563.61	6036.85	984.786	977.812	942.969	287.218	477.273	393.919	1011.26	713.687	755.427	6037.94	5017.61	7567.59	503.056	764.236	595.614	1582.6	1172.66	1510.74	2495.64	1083.66
pgaptmp_004138	pgaptmp_004138	pgaptmp_004138	protein_coding	protein_coding	pgaptmp_004138	0.3941	987				TRUE	-0.887704	0.000154015	0.00197109	Chromosome_II	955859	956845	987	-	5.08158	26.9823	25.5234	31.8564	45.4832	47.1083	72.5708	54.1994	32.0908	34.4842	24.216	30.8401	11.1155	23.5666	14.4292	22.3967	37.0796	39.9452	19.8448	53.6458	55.4327	58.1547	1.12647	1.06872	1.34716	2.48255	2.46788	3.59897	2.61463	1.41287
pgaptmp_004165	pgaptmp_004165	icmH	protein_coding	protein_coding	pgaptmp_004165	0.4583	792				TRUE	-0.879425	0.000154704	0.00197293	Chromosome_II	1005737	1006528	792	+	6.0831	60.9029	71.2895	68.6138	79.4355	92.1685	106.382	114.338	100.004	107.675	72.6481	43.5389	44.4622	47.1332	36.6279	44.7934	32.0233	30.6246	35.7207	109.527	136.352	123.786	3.16863	3.71999	3.61599	5.40323	6.01729	6.57471	6.87385	5.48693
pgaptmp_004873	pgaptmp_004873	pgaptmp_004873	protein_coding	protein_coding	pgaptmp_004873	0.5024	414				TRUE	-1.25646	0.000155241	0.00197293	Chromosome_II	1803311	1803724	414	+	6.43401	100.991	117.056	67.797	146.699	128.353	98.9602	148.491	117.169	104.156	68.6121	45.353	42.6096	51.552	66.5962	64.5552	28.6524	39.9452	33.0747	232.465	207.076	242.588	10.0517	11.6851	6.83519	19.0894	16.0306	11.7002	17.0779	12.2984
pgaptmp_003170	pgaptmp_003170	pgaptmp_003170	protein_coding	protein_coding	pgaptmp_003170	0.4847	522	GO:0046177	GO:0005524,GO:0046316		TRUE	-0.799538	0.000155507	0.00197293	Chromosome_I	3437372	3437893	522	+	11.0544	1151.76	1087.82	1092.1	666.874	857.508	966.512	1051.32	889.587	1039.45	2677.89	3688.11	3412.47	3752.98	3879.23	4973.39	6606.91	7287.33	13887.4	1760.81	1674.45	2125.97	90.9179	86.1251	87.3241	68.8236	84.9399	90.6294	95.8952	74.0552
pgaptmp_000934	pgaptmp_000934	fadI	protein_coding	protein_coding	pgaptmp_000934	0.4962	1308	GO:0006631,GO:0016042	GO:0003988	GO:0005737	TRUE	1.22883	0.000155659	0.00197293	Chromosome_I	980574	981881	1308	+	7.80746	281.387	191.865	205.025	167.199	143.373	94.8369	85.3826	140.304	123.862	565.041	555.121	511.315	377.066	453.964	400.506	372.481	434.071	448.493	86.0568	75.1846	104.678	8.8645	6.06221	6.54243	6.88636	5.66766	3.54897	3.1081	4.66122
pgaptmp_001006	pgaptmp_001006	pgaptmp_001006	protein_coding	protein_coding	pgaptmp_001006	0.4526	1350				TRUE	0.690525	0.000156304	0.00197635	Chromosome_I	1064379	1065728	1350	+	10.0212	1982.04	2174.77	2136.83	1431.12	1375.02	1153.71	1588.12	1570.96	1477.89	490.375	524.281	542.809	717.309	832.452	812.869	584.846	591.189	642.973	1171.27	1237.36	1301	60.4975	66.5765	66.0659	57.1092	52.6645	41.8308	56.012	50.5671
pgaptmp_005297	pgaptmp_005297	pgaptmp_005297	protein_coding	protein_coding	pgaptmp_005297	0.4746	630	GO:0008152	GO:0016787		TRUE	-0.824787	0.000157475	0.00198637	Chromosome_II	2283058	2283687	630	+	7.91185	218.942	190.985	192.772	329.273	255.341	241.628	369.744	344.79	363.844	201.8	188.669	200.08	144.346	200.898	191.031	192.14	199.726	187.864	333.61	365.091	336.466	14.3201	12.5286	12.7716	28.1566	20.9567	18.7732	27.9443	23.7821
pgaptmp_004251	pgaptmp_004251	pgaptmp_004251	protein_coding	protein_coding	pgaptmp_004251	0.4395	339		GO:0003677		TRUE	-0.90196	0.000158265	0.00199156	Chromosome_II	1102511	1102849	339	+	6.0177	60.9029	61.6082	54.7277	126.2	100.361	87.4149	103.944	82.8391	85.8587	56.5041	23.5836	46.3148	32.4041	69.926	42.1585	32.0233	33.2876	52.9196	122.938	107.68	103.017	7.40281	7.5107	6.73827	20.055	15.3077	12.6217	14.5993	10.6187
pgaptmp_003735	pgaptmp_003735	pgaptmp_003735	protein_coding	protein_coding	pgaptmp_003735	0.4538	1287				TRUE	-0.926813	0.000158898	0.00199475	Chromosome_II	493646	494932	1287	+	6.97805	109.471	102.974	106.188	204.995	219.839	145.966	167.795	229.86	193.534	84.7561	161.457	79.6614	86.9019	64.3763	94.8567	60.6757	71.9013	93.9322	167.643	193.696	238.434	3.50493	3.30666	3.4438	8.58081	8.83222	5.55146	6.20775	7.76107
pgaptmp_004572	pgaptmp_004572	pgaptmp_004572	protein_coding	protein_coding	pgaptmp_004572	0.463	972	GO:0017013	GO:0016740,GO:0046872	GO:0005886	TRUE	-1.10047	0.00016268	0.00203737	Chromosome_II	1458038	1459009	972	-	6.64391	61.6738	58.0877	73.5148	112.106	148.152	157.512	78.7005	73.1372	70.376	113.008	116.104	96.3347	98.6852	85.4651	73.7774	106.182	119.836	109.808	169.319	124.883	123.786	2.61452	2.46979	3.15682	6.21339	7.88108	7.93194	3.85517	3.26971
pgaptmp_004187	pgaptmp_004187	pgaptmp_004187	protein_coding	protein_coding	pgaptmp_004187	0.4465	1812	GO:0019290			TRUE	-0.880311	0.000163473	0.00204244	Chromosome_II	1028551	1030362	1812	-	6.32978	44.7135	40.4854	44.9257	102.497	116.064	77.5188	59.3966	77.615	83.7474	98.8822	110.661	72.251	89.8477	89.9048	59.2854	94.3844	130.488	105.839	89.9684	76.4589	79.755	1.01681	0.923382	1.03485	3.04732	3.31195	2.09403	1.56076	1.86134
pgaptmp_000686	pgaptmp_000686	pgaptmp_000686	protein_coding	protein_coding	pgaptmp_000686	0.4921	1014				TRUE	0.77917	0.000163968	0.00204377	Chromosome_I	711116	712129	1014	-	9.49037	2054.51	2117.56	2106.61	2060.84	2353.37	1175.98	1315.63	1738.13	1622.17	173.548	186.855	222.311	206.208	180.92	181.809	392.706	390.131	420.711	1009.21	1175.56	1300.17	83.4888	86.3057	86.7134	109.489	120.004	56.7667	61.7775	74.4871
pgaptmp_001602	pgaptmp_001602	pgaptmp_001602	protein_coding	protein_coding	pgaptmp_001602	0.3536	2175				TRUE	1.01193	0.000164415	0.0020445	Chromosome_I	1670038	1672212	2175	-	11.2906	4775.1	5870.38	5680.24	4329.87	4127.1	4430.12	5719.15	5080.05	5486.51	1707.23	1603.68	917.033	1061.97	1126.59	621.838	2504.56	1955.98	779.241	2900.22	2611.71	2160.86	90.4651	111.545	109.006	107.246	98.1137	99.6986	125.2	101.495
pgaptmp_001975	pgaptmp_001975	pgaptmp_001975	protein_coding	protein_coding	pgaptmp_001975	0.4939	984		GO:0016783		TRUE	1.43722	0.000165597	0.00205434	Chromosome_I	2135420	2136403	984	+	5.19359	147.246	95.0526	81.6831	28.8274	38.2328	32.9867	36.3804	44.0316	38.003	28.252	16.3271	22.2311	36.8228	12.2093	28.984	26.967	29.2931	34.3977	34.0874	33.7693	33.2313	6.16605	3.99218	3.4648	1.57824	2.00903	1.64088	1.76038	1.94449
pgaptmp_003439	pgaptmp_003439	pgaptmp_003439	protein_coding	protein_coding	pgaptmp_003439	0.4134	1161				TRUE	-0.988968	0.000167379	0.00207156	Chromosome_II	188533	189693	1161	+	5.79764	51.6518	38.7251	46.5594	47.405	42.3292	59.3761	63.8513	78.3613	54.1895	36.3241	50.7954	37.0518	29.4583	44.3975	42.1585	57.3048	46.6027	120.392	82.7039	96.8479	102.186	1.83321	1.37849	1.67385	2.19966	1.88518	2.5033	2.61861	2.93296
pgaptmp_002677	pgaptmp_002677	pgaptmp_002677	protein_coding	protein_coding	pgaptmp_002677	0.4338	1005				TRUE	0.875025	0.000167795	0.00207184	Chromosome_I	2899899	2900903	1005	-	10.5395	2918.71	3572.39	3166.04	1850.08	1817.43	1937.15	2511.73	2186.65	2256.96	641.725	716.578	692.869	762.969	810.254	814.186	1228.68	1239.63	1399.72	1781.49	1720.96	1492.08	119.67	146.904	131.489	99.1718	93.5049	94.3472	118.998	94.5477
pgaptmp_003532	pgaptmp_003532	pgaptmp_003532	protein_coding	protein_coding	pgaptmp_003532	0.4692	2031				TRUE	-0.857625	0.000169482	0.00208619	Chromosome_II	285359	287389	2031	+	8.92635	373.898	345.886	303.044	570.142	632.207	522.84	512.296	503.005	477.853	548.897	551.493	487.231	396.214	414.006	386.014	541.025	520.619	509.351	549.31	588.733	652.163	7.58579	7.03825	6.22783	15.123	16.0951	12.6006	12.01	10.7622
pgaptmp_001206	pgaptmp_001206	pgaptmp_001206	protein_coding	protein_coding	pgaptmp_001206	0.4756	513				TRUE	0.851586	0.000170023	0.00208619	Chromosome_I	1285666	1286178	513	-	9.97819	7268.26	8918.22	8676.38	4819.94	3990.55	3924.6	10194.7	7936.13	8224.13	62.5581	107.033	92.6295	100.158	106.554	151.507	55.6194	115.841	71.4414	3913.35	4604.1	4594.22	583.81	718.46	705.931	506.161	402.216	374.464	946.213	672.247
pgaptmp_003732	pgaptmp_003732	pgaptmp_003732	protein_coding	protein_coding	pgaptmp_003732	0.4703	1971	GO:0034755	GO:0005381	GO:0033573	TRUE	-0.824285	0.000170318	0.00208619	Chromosome_II	489586	491556	1971	+	8.37113	410.902	400.453	468.861	876.993	792.649	579.742	784.035	927.648	851.549	129.152	230.393	137.092	106.05	113.214	100.126	148.318	105.189	136.268	633.132	733.368	814.166	8.59033	8.39666	9.92884	23.9703	20.794	14.3973	18.9401	20.4519
pgaptmp_003698	pgaptmp_003698	pgaptmp_003698	protein_coding	protein_coding	pgaptmp_003698	0.4489	891	GO:0006355	GO:0003700		TRUE	-0.884044	0.000170544	0.00208619	Chromosome_II	457023	457913	891	-	7.87483	173.458	222.67	209.109	390.131	348.192	329.043	380.881	343.297	351.176	110.99	123.36	161.175	107.523	152.061	176.539	210.679	218.367	244.753	354.286	393.763	330.651	8.02184	10.3282	9.7957	23.5883	20.2062	18.0762	20.3537	16.7429
pgaptmp_003070	pgaptmp_003070	rph	protein_coding	protein_coding	pgaptmp_003070	0.5049	717	GO:0008033	GO:0000049,GO:0009022		TRUE	-0.747359	0.000171565	0.00209381	Chromosome_I	3320855	3321571	717	-	12.4303	4468.27	4589.81	4869.95	6440.68	6268.14	5901.33	3554.14	3525.51	3546.95	7163.91	9317.33	8292.2	6305.54	6134.62	6725.6	3311.88	4411.28	4154.19	7328.24	7650.35	7304.23	256.79	264.556	283.495	483.923	452.026	402.869	236.02	213.668
pgaptmp_004431	pgaptmp_004431	pgaptmp_004431	protein_coding	protein_coding		0.5	1000				TRUE	-1.91583	0.00017327	0.00210381	pgaptmp_004431	1	1000	1000	+	11.351	844.16	928.523	1144.38	2469.55	2009.96	4012.01	1225.05	1314.98	1180.2	6171.05	4284.96	6915.72	2730.78	2501.8	3019.6	6097.91	4792.09	4262.67	5029.85	3289.64	2143.42	34.7843	38.3738	47.7652	133.04	103.927	196.379	58.3295	57.142
pgaptmp_003343	pgaptmp_003343	ureG	protein_coding	protein_coding	pgaptmp_003343	0.4634	615	GO:0019627	GO:0003924,GO:0016530,GO:0046872		TRUE	-0.880627	0.000173394	0.00210381	Chromosome_II	79231	79845	615	-	5.12157	18.5021	19.3626	18.7871	33.9523	40.281	42.8828	27.4709	38.0612	31.6692	46.4141	41.7248	14.8207	44.1874	45.5074	42.1585	47.1922	34.6192	39.6897	36.3227	37.5923	44.0314	1.23967	1.30116	1.27505	2.97411	3.38664	3.41303	2.12682	2.68933
pgaptmp_004042	pgaptmp_004042	pgaptmp_004042	protein_coding	protein_coding	pgaptmp_004042	0.4457	543				TRUE	-0.833203	0.000173618	0.00210381	Chromosome_II	811491	812033	543	-	9.70464	521.915	479.664	425.569	811.01	869.797	496.451	521.205	535.842	579.194	1144.21	1101.17	1081.91	1780.75	2065.59	2312.13	750.019	766.947	998.857	778.423	781.155	888.936	39.6057	36.5072	32.7123	80.462	82.8251	44.7516	45.7027	42.8819
pgaptmp_003955	pgaptmp_003955	pgaptmp_003955	protein_coding	protein_coding	pgaptmp_003955	0.4342	456				TRUE	-0.726432	0.000173984	0.00210381	Chromosome_II	724656	725111	456	+	8.57528	245.153	257.874	275.272	411.271	397.349	473.36	481.855	416.434	421.552	435.889	351.94	402.012	409.47	304.123	349.125	421.359	442.06	382.344	389.491	436.453	414.56	22.1529	23.3714	25.1964	48.5878	45.0558	50.8112	50.3134	39.6843
pgaptmp_005080	pgaptmp_005080	pgaptmp_005080	protein_coding	protein_coding	pgaptmp_005080	0.4566	357				TRUE	0.794677	0.000174507	0.00210529	Chromosome_II	2041289	2041645	357	+	5.86922	171.916	168.982	164.183	96.0913	83.293	75.0448	297.725	282.847	244.205	18.162	10.8847	11.1155	14.7291	22.1987	15.8094	25.2815	18.6411	30.4287	87.1744	96.2108	84.7397	19.8429	19.5621	19.1956	14.5004	12.0638	10.2893	39.7082	34.4287
pgaptmp_003769	pgaptmp_003769	pgaptmp_003769	protein_coding	protein_coding	pgaptmp_003769	0.4812	1332	GO:0006355	GO:0005524,GO:0008134		TRUE	0.854361	0.000175184	0.00210862	Chromosome_II	523014	524345	1332	+	5.88366	107.158	128.497	109.455	50.6081	45.0601	65.1488	51.972	66.4205	40.1143	36.3241	43.5389	57.4303	27.9854	28.8583	50.0632	52.2485	69.2383	137.591	61.4691	55.4327	54.8316	3.31497	3.98686	3.42984	2.04682	1.74917	2.39406	1.8578	2.16688
pgaptmp_005215	pgaptmp_005215	pgaptmp_005215	protein_coding	protein_coding	pgaptmp_005215	0.2989	465				TRUE	-1.44832	0.000176435	0.00211764	Chromosome_II	2187388	2187852	465	+	6.32504	23.1277	33.4444	32.6732	74.9512	69.6384	106.382	48.2597	26.1204	44.3368	121.08	132.431	124.124	116.36	81.0254	92.2218	259.557	225.024	137.591	107.292	96.8479	61.4778	2.04945	2.97244	2.93278	8.6834	7.74354	11.1982	4.94157	2.44098
pgaptmp_002460	pgaptmp_002460	pgaptmp_002460	protein_coding	protein_coding	pgaptmp_002460	0.4714	210				TRUE	1.02815	0.000176911	0.00211764	Chromosome_I	2677968	2678177	210	-	8.82452	1065.42	1224.24	1494.8	698.904	643.131	949.194	1278.51	1117.95	1103.49	183.638	181.412	194.522	220.937	192.019	183.126	176.971	182.416	137.591	614.691	631.423	502.623	209.054	240.929	297.102	179.293	158.352	221.242	289.88	231.335
pgaptmp_004449	pgaptmp_004449	yfcC	protein_coding	protein_coding	pgaptmp_004449	0.4853	1533			GO:0016020	TRUE	0.878829	0.000177141	0.00211764	Chromosome_II	1317004	1318536	1533	+	11.0745	2471.58	2824.3	3136.63	3320.91	3709.27	3198.06	2942.36	3194.15	2956.49	1987.73	2024.56	2197.17	1766.02	1510.62	1781.2	1430.93	1384.77	1678.87	1246.15	1579.51	1531.13	66.434	76.1394	85.4008	116.702	125.109	102.112	91.3874	90.5422
pgaptmp_001575	pgaptmp_001575	pgaptmp_001575	protein_coding	protein_coding	pgaptmp_001575	0.4774	1881		GO:0008773		TRUE	1.1456	0.000177853	0.00211878	Chromosome_I	1639196	1641076	1881	+	7.84639	363.876	309.801	274.455	181.292	208.232	162.46	198.979	255.98	266.725	260.322	286.631	274.183	322.568	264.165	245.046	276.411	225.024	234.169	114.556	117.237	168.649	7.97117	6.80669	6.09009	5.19224	5.72405	4.22756	5.03675	5.91364
pgaptmp_004804	pgaptmp_004804	pgaptmp_004804	protein_coding	protein_coding	pgaptmp_004804	0.4375	336				TRUE	-1.19359	0.000178431	0.00211878	Chromosome_II	1730658	1730993	336	+	6.18502	41.6298	41.3655	35.9406	85.2009	92.1685	78.3435	76.4731	71.6446	68.2647	84.7561	68.9366	72.251	66.2811	99.8943	102.761	77.53	69.2383	51.5966	104.498	108.317	72.278	5.10533	5.08792	4.46464	13.6606	14.1836	11.4129	10.8368	9.26577
pgaptmp_001561	pgaptmp_001561	pgaptmp_001561	protein_coding	protein_coding	pgaptmp_001561	0.4203	138				TRUE	1.12176	0.000178445	0.00211878	Chromosome_I	1620152	1620289	138	+	9.89264	1157.93	1369.46	1613.24	1120.42	794.697	1455.54	1155.26	631.368	846.623	2405.46	2039.07	1454.28	598.003	803.594	440.03	1211.83	768.279	566.239	728.13	531.389	534.192	345.748	410.121	487.934	437.389	297.76	516.271	398.598	198.811
pgaptmp_000619	pgaptmp_000619	opaR	protein_coding	protein_coding	pgaptmp_000619	0.4472	615				TRUE	1.45253	0.000178962	0.00212014	Chromosome_I	626466	627080	615	-	12.2255	6642.27	8920.86	10648.2	7421.45	6381.47	10804.8	8548.65	6396.52	6297.24	4913.84	4658.66	1672.89	2592.33	3034.57	1413.63	9703.05	6686.82	2405.19	3754.09	2954.5	2338.65	445.041	599.478	722.674	650.097	536.525	859.953	661.844	451.966
pgaptmp_003151	pgaptmp_003151	rmuC	protein_coding	protein_coding	pgaptmp_003151	0.4866	1533				TRUE	1.10303	0.000181161	0.00213672	Chromosome_I	3413613	3415145	1533	-	10.0607	2423.78	1921.3	1982.45	689.935	688.191	490.678	1097.35	1198.55	1304.07	1438.84	1298.91	1250.5	995.69	1271.99	1028.93	659.005	837.517	795.116	778.423	874.18	1162.26	65.1493	51.7957	53.976	24.2455	23.2119	15.667	34.0829	33.9745
pgaptmp_002913	pgaptmp_002913	leuA	protein_coding	protein_coding	pgaptmp_002913	0.48	1548	GO:0019752	GO:0003852		TRUE	1.1793	0.000181174	0.00213672	Chromosome_I	3170610	3172157	1548	+	9.8383	1544.16	1318.42	1129.68	607.297	741.444	473.36	999.348	1292.59	1201.32	774.913	859.894	746.594	1260.81	1530.6	1486.09	869.685	1034.58	931.384	440.901	563.884	674.595	41.1035	35.1984	30.4596	21.1346	24.7657	14.9676	30.7382	36.285
pgaptmp_000640	pgaptmp_000640	pgaptmp_000640	protein_coding	protein_coding	pgaptmp_000640	0.4349	1014				TRUE	-1.103	0.000181704	0.00213817	Chromosome_I	652424	653437	1014	+	12.8499	7441.72	8156.04	8860.98	9769.92	8963.55	12774.1	7018.45	6635.33	6542.85	6427.34	5984.79	5894.94	4006.33	4738.32	4398.98	6013.63	4709.54	3880.33	20250.2	15036.3	14660	302.408	332.417	364.741	519.06	457.074	616.631	329.561	284.356
pgaptmp_004721	pgaptmp_004721	pgaptmp_004721	protein_coding	protein_coding	pgaptmp_004721	0.4059	441				TRUE	-1.09783	0.00018601	0.00218395	Chromosome_II	1638933	1639373	441	-	2.68784	2.31277	2.64035	2.45049	7.04669	7.51002	0	6.68212	4.47779	6.33384	0	9.07061	9.26295	10.3104	6.65962	9.22218	3.37087	6.65753	13.2299	17.3231	10.8317	10.8002	0.216098	0.247437	0.231929	0.860817	0.880535	0	0.721453	0.441227
pgaptmp_004220	pgaptmp_004220	pgaptmp_004220	protein_coding	protein_coding	pgaptmp_004220	0.4022	828				TRUE	-1.11383	0.000187054	0.00218818	Chromosome_II	1069684	1070511	828	-	9.5354	522.686	625.763	599.554	894.29	937.387	1031.66	657.817	555.246	629.161	1138.15	968.741	935.558	550.87	742.547	687.711	515.743	454.044	416.742	1493.14	1130.32	991.122	26.0117	31.2335	30.2231	58.1851	58.5373	60.9873	37.8275	29.1402
pgaptmp_003594	pgaptmp_003594	pgaptmp_003594	protein_coding	protein_coding	pgaptmp_003594	0.4434	954				TRUE	-0.790689	0.000187905	0.00218818	Chromosome_II	344601	345554	954	+	10.4033	1108.59	1295.53	1391.88	1786.66	1585.98	1733.45	2300.88	2247.85	2073.28	789.039	722.02	1024.48	957.394	886.839	981.503	1002.83	1102.49	1119.25	2073.74	2203.29	1980.58	47.8828	56.1231	60.8968	100.892	85.9594	88.9399	114.836	102.39
pgaptmp_001536	pgaptmp_001536	pgaptmp_001536	protein_coding	protein_coding	pgaptmp_001536	0.4685	429				TRUE	1.042	0.000187995	0.00218818	Chromosome_I	1593059	1593487	429	+	7.66904	373.127	418.056	468.044	294.039	258.754	272.141	324.454	367.925	358.214	117.044	108.847	116.713	167.912	105.444	100.126	160.116	181.085	82.0253	149.202	223.005	199.388	35.8391	40.2734	45.5376	36.9243	31.1871	31.0505	36.0104	37.2683
pgaptmp_002054	pgaptmp_002054	pgaptmp_002054	protein_coding	protein_coding	pgaptmp_002054	0.4333	420				TRUE	1.03343	0.000188034	0.00218818	Chromosome_I	2219598	2220017	420	-	8.87605	630.615	591.439	568.514	254.962	273.092	237.505	370.486	446.286	434.923	401.583	569.634	418.686	1060.5	551.638	853.71	630.353	1177.05	689.277	214.024	319.216	291.604	61.869	58.1972	56.498	32.7032	33.6204	27.6793	42.0006	46.1744
pgaptmp_004003	pgaptmp_004003	pgaptmp_004003	protein_coding	protein_coding	pgaptmp_004003	0.4224	606	GO:0006744,GO:0032259	GO:0008425,GO:0061542,GO:0102208		TRUE	-1.09734	0.000188908	0.0021935	Chromosome_II	772656	773261	606	+	8.98854	323.017	339.725	393.712	826.385	802.89	870.85	541.994	535.096	482.779	542.843	511.582	527.988	332.878	347.41	397.871	433.157	466.027	367.791	878.45	698.962	591.516	21.964	23.1684	27.1174	73.4639	68.5058	70.3402	42.5848	38.3704
pgaptmp_001765	pgaptmp_001765	pgaptmp_001765	protein_coding	protein_coding	pgaptmp_001765	0.4503	1077		GO:0016757		TRUE	0.72636	0.000190643	0.00220877	Chromosome_I	1861763	1862839	1077	+	6.92476	193.502	201.547	214.01	130.684	160.441	147.616	161.113	131.348	160.457	137.224	92.5202	77.8088	97.2123	84.3552	106.714	94.3844	86.5479	54.2426	113.438	117.874	110.494	7.40333	7.73396	8.2939	6.53689	7.70273	6.70887	7.12276	5.29964
pgaptmp_004159	pgaptmp_004159	tssM	protein_coding	protein_coding	pgaptmp_004159	0.4369	3390	GO:0033103	GO:0003674		TRUE	-0.78846	0.000191636	0.00221274	Chromosome_II	996442	999831	3390	-	8.09014	250.55	320.363	271.188	495.831	449.919	440.373	545.706	521.662	527.82	203.818	232.208	150.06	117.833	138.742	101.444	148.318	171.764	129.653	477.783	457.479	464.407	3.04546	3.90556	3.33896	7.87949	6.86243	6.35849	7.66464	6.68694
pgaptmp_004442	pgaptmp_004442	pgaptmp_004442	protein_coding	protein_coding	pgaptmp_004442	0.4485	903				TRUE	-1.04651	0.000191827	0.00221274	Chromosome_II	1310011	1310913	903	-	9.51689	648.346	703.213	720.445	1524.65	1675.42	1152.89	908.025	838.092	976.818	621.545	633.128	631.734	347.608	467.283	440.03	431.471	306.246	342.654	1452.35	1554.66	1076.69	29.5854	32.1841	33.3007	90.9591	95.9355	62.493	47.8788	40.3312
pgaptmp_002026	pgaptmp_002026	pgaptmp_002026	protein_coding	protein_coding	pgaptmp_002026	0.4439	579		GO:0004797,GO:0005524		TRUE	-0.721429	0.000193315	0.00222502	Chromosome_I	2192174	2192752	579	-	10.731	874.997	945.246	822.549	1351.68	1382.53	1194.94	633.316	638.085	696.018	3174.32	2782.86	3040.1	3679.34	3518.5	3551.86	3994.48	3923.95	3057.43	1371.88	1312.54	1488.76	62.2711	67.4695	59.2958	125.765	123.464	101.019	52.0804	47.8892
pgaptmp_000748	pgaptmp_000748	glpK	protein_coding	protein_coding	pgaptmp_000748	0.4822	1518	GO:0006072	GO:0004370		TRUE	1.36112	0.000194886	0.00223445	Chromosome_I	784424	785941	1518	-	8.33295	481.056	336.205	311.213	250.478	252.61	179.778	201.948	238.815	294.171	397.547	901.618	437.211	508.155	410.676	380.744	492.147	491.326	742.197	115.115	122.334	172.803	13.0582	9.15321	8.55709	8.88919	8.60444	5.79692	6.33434	6.83641
pgaptmp_003946	pgaptmp_003946	pgaptmp_003946	protein_coding	protein_coding	pgaptmp_003946	0.4283	1653	GO:0009244,GO:1900727	GO:0008484,GO:0016776	GO:0005886	TRUE	-0.785514	0.000195071	0.00223445	Chromosome_II	714500	716152	1653	-	9.1181	476.43	565.915	606.905	813.573	753.733	842.811	905.055	680.624	793.137	452.033	448.088	418.686	309.312	336.311	284.57	412.932	360.838	366.468	946.624	902.852	868.167	11.8764	14.1488	15.3246	26.5148	23.577	24.9569	26.0696	17.8925
pgaptmp_001586	pgaptmp_001586	pgaptmp_001586	protein_coding	protein_coding	pgaptmp_001586	0.4353	1167				TRUE	-0.91138	0.000195663	0.00223445	Chromosome_I	1654167	1655333	1167	+	7.46382	184.251	220.029	267.921	276.743	234.176	258.946	305.15	279.115	284.319	90.8102	87.0778	74.1036	100.158	103.224	73.7774	112.924	89.2109	99.2242	400.667	423.71	395.452	6.50573	7.79204	9.58244	12.7753	10.3757	10.861	12.4502	10.3932
pgaptmp_001043	pgaptmp_001043	oppC	protein_coding	protein_coding	pgaptmp_001043	0.4673	903	GO:0055085			TRUE	0.799549	0.000195833	0.00223445	Chromosome_I	1105517	1106419	903	+	9.78586	1173.34	1217.2	1139.48	643.812	722.328	645.716	762.504	873.915	765.69	1325.83	1422.27	1144.9	879.329	691.49	692.981	1135.98	1113.14	951.229	631.455	555.601	742.719	53.5422	55.7079	52.6695	38.4092	41.3609	35.0015	40.2056	42.0551
pgaptmp_004156	pgaptmp_004156	tssF	protein_coding	protein_coding	pgaptmp_004156	0.4574	1749	GO:0033103	GO:0003674		TRUE	-0.849909	0.000199656	0.00226939	Chromosome_II	993116	994864	1749	+	5.9528	64.7575	59.8479	60.4455	85.2009	92.1685	67.6228	83.8977	102.243	109.083	34.3061	52.6095	44.4622	48.6062	43.2875	51.3807	38.765	25.2986	21.1678	97.233	118.511	120.463	1.52566	1.41417	1.4425	2.62433	2.72481	1.8925	2.28398	2.54027
pgaptmp_003634	pgaptmp_003634	brnQ	protein_coding	protein_coding	pgaptmp_003634	0.492	1311	GO:0015803	GO:0015658	GO:0016020	TRUE	-0.995267	0.000199758	0.00226939	Chromosome_II	387131	388441	1311	-	6.97229	56.2774	78.3304	53.094	149.902	120.843	133.596	97.2619	96.2724	99.9338	167.494	157.829	137.092	134.035	183.139	208.158	165.173	169.101	182.572	120.703	125.52	131.263	1.76884	2.46927	1.69038	6.15985	4.7661	4.98798	3.53242	3.19107
pgaptmp_001263	pgaptmp_001263	pgaptmp_001263	protein_coding	protein_coding	pgaptmp_001263	0.4468	1701				TRUE	0.690848	0.000201815	0.00228782	Chromosome_I	1348993	1350693	1701	+	8.68217	770.152	832.591	795.593	541.314	573.493	419.756	703.107	729.879	769.913	163.458	177.784	214.901	291.637	342.97	285.887	242.703	235.677	261.952	433.637	468.311	507.607	18.6565	20.2287	19.5222	17.1439	17.4328	12.0789	19.6811	18.6459
pgaptmp_004743	pgaptmp_004743	pgaptmp_004743	protein_coding	protein_coding	pgaptmp_004743	0.4262	1518		GO:0005524,GO:0016887		TRUE	0.713977	0.000202695	0.00229285	Chromosome_II	1660506	1662023	1518	-	9.64886	1576.54	1606.21	1441.71	1500.95	1561.4	1180.1	2099.67	2155.31	2205.58	403.601	384.594	301.972	319.622	334.091	276.665	534.283	459.37	392.928	870.067	915.595	894.752	42.7948	43.7294	39.6411	53.2669	53.1847	38.0522	65.8585	61.6986
pgaptmp_004205	pgaptmp_004205	pgaptmp_004205	protein_coding	protein_coding	pgaptmp_004205	0.455	723				TRUE	-0.705489	0.000203298	0.00229473	Chromosome_II	1055927	1056649	723	+	9.43596	440.968	500.786	481.113	767.449	811.765	908.785	620.694	611.964	627.05	823.345	874.407	987.431	702.58	561.628	588.902	891.595	733.66	690.6	773.952	727.634	720.288	25.132	28.6257	27.7747	57.1841	58.0545	61.5256	40.8764	36.7811
pgaptmp_002090	pgaptmp_002090	pgaptmp_002090	protein_coding	protein_coding	pgaptmp_002090	0.4769	2166		GO:0016829		TRUE	1.04116	0.000207406	0.00233609	Chromosome_I	2263408	2265573	2166	+	7.37706	426.32	408.374	337.351	198.589	207.55	140.194	288.073	331.356	329.359	84.7561	99.7767	90.777	66.2811	83.2452	90.9043	139.891	94.5369	125.684	142.497	199.43	191.911	8.11028	7.79187	6.50077	4.93924	4.95459	3.16813	6.33253	6.64774
pgaptmp_000087	pgaptmp_000087	pgaptmp_000087	protein_coding	protein_coding	pgaptmp_000087	0.4583	336	GO:0006355	GO:0003700		TRUE	1.10727	0.000208889	0.00234776	Chromosome_I	95160	95495	336	+	5.78304	105.616	81.8509	82.4999	29.468	34.1365	18.1427	30.4407	29.8519	40.8181	42.3781	56.2378	35.1992	106.05	118.763	119.888	87.6426	91.8739	101.87	29.0581	41.4152	38.2159	12.9524	10.0676	10.2484	4.72471	5.25319	2.64299	4.31369	3.86074
pgaptmp_004926	pgaptmp_004926	dmeF	protein_coding	protein_coding	pgaptmp_004926	0.4525	915	GO:0006812,GO:0055085	GO:0008324	GO:0016020	TRUE	-0.918699	0.000209607	0.00235081	Chromosome_II	1857928	1858842	915	-	7.49632	97.9072	102.974	126.609	212.041	208.915	196.271	161.856	135.826	134.418	193.728	217.695	179.701	184.114	172.04	194.983	225.848	307.578	248.722	215.142	212.811	178.618	4.40912	4.651	5.77542	12.4843	11.8057	10.4995	8.42247	6.4506
pgaptmp_004819	pgaptmp_004819	pgaptmp_004819	protein_coding	protein_coding	pgaptmp_004819	0.4472	369		GO:0003677		TRUE	-0.884114	0.000210982	0.00235904	Chromosome_II	1748284	1748652	369	-	9.1528	222.026	264.035	313.663	500.956	340.682	837.039	544.964	337.327	381.438	900.03	948.786	948.527	899.95	599.366	689.028	1255.65	969.336	975.043	484.488	487.425	447.791	24.7933	29.5717	35.4795	73.137	47.7383	111.033	70.3192	39.7248
pgaptmp_000986	pgaptmp_000986	pgaptmp_000986	protein_coding	protein_coding	pgaptmp_000986	0.4623	969				TRUE	1.82311	0.000211237	0.00235904	Chromosome_I	1043977	1044945	969	+	8.98849	2423.78	1681.9	1566.68	673.28	768.071	440.373	755.822	962.724	1045.08	143.278	150.572	161.175	247.45	297.463	304.332	313.491	326.219	629.743	302.875	583.636	640.533	103.069	71.733	67.4835	37.4314	40.9847	22.2449	37.1388	43.1733
pgaptmp_003846	pgaptmp_003846	pgaptmp_003846	protein_coding	protein_coding	pgaptmp_003846	0.4378	450				TRUE	-1.25032	0.000211834	0.00236069	Chromosome_II	613328	613777	450	+	7.09424	61.6738	92.4123	89.0346	210.76	180.241	243.277	100.232	98.5113	125.973	163.458	107.033	161.175	141.4	102.114	118.571	180.342	141.14	123.038	227.436	196.882	151.202	5.64737	8.48709	8.25823	25.2313	20.7102	26.4619	10.6054	9.51286
pgaptmp_005276	pgaptmp_005276	pgaptmp_005276	protein_coding	protein_coding	pgaptmp_005276	0.4757	309				TRUE	-0.71508	0.000215116	0.00239219	Chromosome_II	2260859	2261167	309	-	8.50693	276.761	302.76	319.381	471.488	389.156	433.776	458.096	472.407	497.558	401.583	486.185	470.558	407.997	319.662	339.903	124.722	207.715	220.939	456.548	499.531	461.914	36.9067	40.4932	43.1411	82.2008	65.1192	68.7131	70.588	66.4347
pgaptmp_003704	pgaptmp_003704	pgaptmp_003704	protein_coding	protein_coding	pgaptmp_003704	0.443	675				TRUE	-1.38223	0.000215624	0.00239279	Chromosome_II	464159	464833	675	-	11.8534	1056.16	1443.39	1736.58	3092.22	2827.18	5690.21	3439.8	2922.5	2606.02	5123.71	7495.95	7013.91	4526.26	3454.12	4106.5	7191.75	7537.65	6476.03	4319.04	3392.86	2770.66	64.4742	88.3735	107.382	246.792	216.568	412.627	242.64	188.143
pgaptmp_004243	pgaptmp_004243	pgaptmp_004243	protein_coding	protein_coding	pgaptmp_004243	0.4622	900	GO:0055085	GO:0022857	GO:0016020	TRUE	-0.814619	0.000217256	0.00240583	Chromosome_II	1094940	1095839	900	-	8.9287	283.7	337.965	378.193	606.656	690.239	747.15	501.901	371.656	362.436	472.213	558.749	496.494	549.397	542.759	594.172	416.303	420.756	480.245	585.074	564.521	537.516	12.989	15.5192	17.5393	36.3132	39.6553	40.6348	26.5527	17.9447
pgaptmp_003995	pgaptmp_003995	pgaptmp_003995	protein_coding	protein_coding	pgaptmp_003995	0.4314	204				TRUE	-0.765186	0.000220366	0.00243514	Chromosome_II	764839	765042	204	+	9.21639	549.668	531.591	480.297	666.874	609.677	611.079	847.886	703.013	772.024	641.725	687.552	566.893	424.199	456.184	422.903	519.114	406.109	418.065	895.773	776.695	876.474	111.027	107.693	98.2698	176.107	154.53	146.622	197.897	149.751
pgaptmp_001733	pgaptmp_001733	pgaptmp_001733	protein_coding	protein_coding	pgaptmp_001733	0.4603	819				TRUE	1.51045	0.000221342	0.00243555	Chromosome_I	1833626	1834444	819	+	10.9007	5105.05	4045.9	4016.36	2991	3713.37	1629.55	3250.48	4097.18	4500.54	3093.6	3176.53	2021.18	1281.43	1434.04	1090.85	417.988	527.276	357.207	951.654	1544.47	1929.91	256.847	204.161	204.687	196.742	234.438	97.3902	188.971	217.389
pgaptmp_001577	pgaptmp_001577	pgaptmp_001577	protein_coding	protein_coding	pgaptmp_001577	0.4859	1665				TRUE	0.68897	0.000221697	0.00243555	Chromosome_I	1642048	1643712	1665	+	9.57216	820.262	752.5	805.395	547.72	641.766	724.884	654.847	641.07	656.608	1134.12	1282.58	1189.36	1119.41	813.583	839.218	896.652	858.821	875.819	467.165	463.851	467.73	20.3	18.6781	20.19	17.7218	19.9299	21.3102	18.7266	16.7313
pgaptmp_002502	pgaptmp_002502	pgaptmp_002502	protein_coding	protein_coding	pgaptmp_002502	0.4635	507				TRUE	-0.830949	0.000221792	0.00243555	Chromosome_I	2718999	2719505	507	+	8.63578	323.017	321.243	294.876	364.506	372.088	288.634	201.948	239.562	249.835	530.735	449.902	498.347	621.57	642.653	678.489	362.369	442.06	324.132	476.106	503.991	635.548	26.2528	26.1859	24.2757	38.7312	37.9473	27.8659	18.9655	20.5327
pgaptmp_004430	pgaptmp_004430	pgaptmp_004430	protein_coding	protein_coding		0.5	1000				TRUE	-1.70871	0.000223934	0.00245394	pgaptmp_004430	1	1000	1000	+	11.2158	854.953	909.161	1168.88	2522.72	1708.87	3621.12	1190.16	1151.54	1123.2	5777.54	3316.21	5802.31	2377.28	2307.56	2686.29	5519.8	4267.48	3861.81	4163.69	3016.94	1932.4	35.229	37.5736	48.788	135.904	88.3595	177.246	56.668	50.0398
pgaptmp_003290	pgaptmp_003290	pgaptmp_003290	protein_coding	protein_coding	pgaptmp_003290	0.5161	465	GO:0030254			TRUE	-1.19374	0.000226229	0.00247394	Chromosome_II	26956	27420	465	-	6.88896	85.5724	95.0526	67.797	84.5603	93.5339	131.122	154.431	123.139	171.717	98.8822	188.669	170.438	97.2123	77.6955	72.46	87.6426	119.836	130.976	146.967	186.687	239.265	7.58297	8.44798	6.08553	9.79666	10.4006	13.8025	15.813	11.5075
pgaptmp_001771	pgaptmp_001771	pgaptmp_001771	protein_coding	protein_coding	pgaptmp_001771	0.4524	1428				TRUE	0.934925	0.000228738	0.00249577	Chromosome_I	1869373	1870800	1428	+	6.44731	194.273	201.547	256.485	121.075	107.189	103.908	112.111	135.08	145.678	44.3961	48.9813	37.0518	33.877	51.0571	47.4283	62.3611	57.2548	54.2426	105.056	115.325	93.0475	5.60585	5.83296	7.49678	4.56763	3.88118	3.56168	3.73812	4.11055
pgaptmp_001720	pgaptmp_001720	fdh3B	protein_coding	protein_coding	pgaptmp_001720	0.4844	609		GO:0009055		TRUE	1.75782	0.000229174	0.00249577	Chromosome_I	1815603	1816211	609	-	10.1473	2363.65	1405.55	1249.75	604.094	879.355	645.716	798.884	1664.24	1411.04	3355.94	3660.9	3795.96	1595.17	1335.25	1309.55	741.592	796.241	683.985	383.903	406.506	627.24	159.928	95.3827	85.6539	53.4381	74.6605	51.8987	62.4596	118.751
pgaptmp_001416	pgaptmp_001416	pgaptmp_001416	protein_coding	protein_coding	pgaptmp_001416	0.4377	393	GO:0009432,GO:0051782			TRUE	1.47357	0.000234319	0.00254653	Chromosome_I	1466937	1467329	393	-	11.6513	7463.3	9465.66	9296.35	2237.01	1900.04	2337.94	3251.22	2159.04	2121.83	4245.88	4343.01	3666.28	1250.5	2394.13	2205.42	4523.71	3244.88	2962.17	4121.78	2553.73	2258.89	782.522	995.405	987.327	306.647	249.985	291.188	393.901	238.729
pgaptmp_003473	pgaptmp_003473	pgaptmp_003473	protein_coding	protein_coding	pgaptmp_003473	0.4713	1239		GO:0004386,GO:0005524,GO:0016887		TRUE	-0.936653	0.000236968	0.00257	Chromosome_II	222292	223530	1239	+	9.15083	396.254	307.161	370.841	564.376	649.958	540.158	449.929	473.153	503.892	881.868	821.797	931.853	584.747	607.135	675.854	557.879	508.635	539.78	600.162	605.937	783.427	13.1783	10.2456	12.4927	24.5393	27.1243	21.3394	17.2904	16.5946
pgaptmp_001800	pgaptmp_001800	pgaptmp_001800	protein_coding	protein_coding	pgaptmp_001800	0.5019	522				TRUE	0.879052	0.00024007	0.00259339	Chromosome_I	1923919	1924440	522	+	4.60772	70.9249	59.8479	57.995	33.3116	39.5983	34.6361	38.6078	44.0316	47.8556	0	9.07061	7.41036	11.7833	14.4292	17.1269	18.5398	25.2986	26.4598	29.0581	29.3092	29.9081	5.59869	4.73828	4.63725	3.43787	3.92238	3.24781	3.52158	3.66548
pgaptmp_000959	pgaptmp_000959	pgaptmp_000959	protein_coding	protein_coding	pgaptmp_000959	0.3561	132				TRUE	-1.43592	0.000240596	0.00259339	Chromosome_I	1013223	1013354	132	+	9.29057	376.981	427.737	347.97	692.498	700.48	1036.61	412.064	328.371	339.916	762.805	562.378	537.251	434.51	610.465	538.839	1350.03	949.364	1055.75	1361.26	903.489	730.257	117.68	133.92	110.029	282.624	274.389	384.391	148.636	108.101
pgaptmp_004155	pgaptmp_004155	tssE	protein_coding	protein_coding	pgaptmp_004155	0.438	411	GO:0033103	GO:0003674		TRUE	-1.13371	0.000240603	0.00259339	Chromosome_II	992695	993105	411	+	4.98946	22.3568	23.7632	16.3366	30.1086	36.1847	46.1814	34.153	43.2853	42.2256	26.234	32.6542	24.0837	10.3104	31.0782	35.5713	15.1689	46.6027	26.4598	48.6165	43.3267	65.6317	2.24143	2.38948	1.65906	3.94651	4.55225	5.49995	3.95658	4.57652
pgaptmp_002120	pgaptmp_002120	pgaptmp_002120	protein_coding	protein_coding	pgaptmp_002120	0.4931	1515				TRUE	0.920265	0.000241682	0.00259969	Chromosome_I	2304923	2306437	1515	-	8.0843	220.484	185.705	202.574	87.7634	130.401	103.908	114.338	138.065	145.678	573.113	531.538	666.933	969.177	1014.48	1152.77	598.33	597.846	641.65	92.7625	85.3791	120.463	5.99684	5.06584	5.581	3.12079	4.45055	3.35715	3.59346	3.96012
pgaptmp_002464	pgaptmp_002464	pgaptmp_002464	protein_coding	protein_coding	pgaptmp_002464	0.468	735				TRUE	1.17049	0.000242614	0.00260439	Chromosome_I	2679870	2680604	735	-	7.78471	557.377	577.357	597.92	242.15	284.015	316.673	671.181	602.262	555.97	84.7561	70.7507	59.2829	122.252	104.334	152.825	111.239	106.52	144.206	184.966	312.844	222.649	31.2478	32.4637	33.9545	17.7485	19.9801	21.089	43.4796	35.607
pgaptmp_003405	pgaptmp_003405	pgaptmp_003405	protein_coding	protein_coding	pgaptmp_003405	0.4407	540				TRUE	-0.739644	0.000243443	0.00260797	Chromosome_II	148086	148625	540	+	6.66275	68.6121	66.0088	73.5148	131.965	117.429	136.07	107.656	108.959	106.268	102.918	79.8213	64.8407	81.0103	125.423	119.888	106.182	106.52	108.485	114.556	117.874	112.986	5.23559	5.05184	5.68227	13.1653	11.2442	12.334	9.49245	8.76817
pgaptmp_001805	pgaptmp_001805	tssF	protein_coding	protein_coding	pgaptmp_001805	0.4635	1752	GO:0033103	GO:0003674		TRUE	0.82953	0.000244521	0.00261419	Chromosome_I	1928320	1930071	1752	+	5.67914	77.8632	95.0526	88.2177	59.5766	49.8392	57.7268	47.5173	55.226	54.1895	40.3601	50.7954	46.3148	53.0249	52.167	52.6982	35.3941	29.2931	27.7828	45.8224	38.2294	46.5238	1.83129	2.24219	2.10166	1.83192	1.47089	1.61278	1.29137	1.36977
pgaptmp_003993	pgaptmp_003993	pgaptmp_003993	protein_coding	protein_coding	pgaptmp_003993	0.4656	1338	GO:0055085	GO:0015297,GO:0042910	GO:0016020	TRUE	-0.682439	0.000247859	0.00263139	Chromosome_II	762825	764162	1338	-	10.1135	664.535	780.664	771.088	1169.75	1213.21	1301.33	1012.71	948.545	891.663	1273.36	1387.8	1393.15	1140.04	1297.52	1310.87	1306.21	1226.32	1198.63	1134.38	1144.97	1118.23	20.4654	24.1129	24.0541	47.0979	46.8839	47.6062	36.0382	30.8063
pgaptmp_003528	pgaptmp_003528	pgaptmp_003528	protein_coding	protein_coding	pgaptmp_003528	0.4721	951				TRUE	-0.894955	0.000247883	0.00263139	Chromosome_II	281167	282117	951	-	6.28679	52.4227	47.5263	46.5594	82.6385	77.8312	78.3435	62.3664	75.3761	69.6722	110.99	90.7061	87.0718	78.0644	87.685	67.1901	69.1029	97.1999	103.193	96.6742	99.3965	81.4166	2.27142	2.06536	2.04347	4.6813	4.23172	4.03232	3.1225	3.44422
pgaptmp_001651	pgaptmp_001651	pgaptmp_001651	protein_coding	protein_coding	pgaptmp_001651	0.4386	627				TRUE	0.946004	0.000248013	0.00263139	Chromosome_I	1726908	1727534	627	-	5.97353	143.392	161.061	208.292	128.762	126.988	117.928	110.626	105.974	106.971	24.216	38.0966	18.5259	19.1479	23.3087	27.6665	38.765	26.6301	27.7828	83.8215	83.4676	74.7703	9.42355	10.6161	13.8658	11.0633	10.4722	9.20621	8.40084	7.34464
pgaptmp_004041	pgaptmp_004041	pgaptmp_004041	protein_coding	protein_coding	pgaptmp_004041	0.4278	360				TRUE	-1.21518	0.00024816	0.00263139	Chromosome_II	810991	811350	360	-	11.7064	1416.19	1842.96	2008.59	3091.58	3354.93	5627.54	2796.09	2267.25	2082.42	4691.86	5162.99	5442.91	4293.54	3759.35	4717.8	3964.14	3953.24	2852.36	4847.68	3617.14	3151.98	162.097	211.571	232.878	462.639	481.865	765.154	369.813	273.675
pgaptmp_001484	pgaptmp_001484	pgaptmp_001484	protein_coding	protein_coding	pgaptmp_001484	0.4598	870	GO:0006355	GO:0003677,GO:0003700		TRUE	0.94083	0.00024864	0.00263139	Chromosome_I	1534252	1535121	870	+	8.44052	1292.84	1394.11	1600.99	778.98	643.131	832.915	1868.77	1482.89	1531.38	54.4861	54.4236	42.6096	69.2269	54.3869	57.968	123.037	163.775	205.063	610.78	837.862	664.625	61.2326	66.2244	76.8086	48.236	38.2229	46.8613	102.275	74.0676
pgaptmp_002780	pgaptmp_002780	vpsR	protein_coding	protein_coding	pgaptmp_002780	0.4449	1335				TRUE	-0.978013	0.000249405	0.00263139	Chromosome_I	3010302	3011636	1335	-	11.5193	2335.9	2657.95	2821.33	2304.27	2206.58	3379.49	2683.24	2319.49	2328.04	3220.73	3249.09	2977.11	2872.18	2856.98	2446.51	3219.18	2817.47	2354.92	5792.07	4693.94	4150.58	72.0992	82.2825	88.2092	92.9857	85.4639	123.909	95.6998	75.5004
pgaptmp_001008	pgaptmp_001008	nhaC	protein_coding	protein_coding	pgaptmp_001008	0.4468	1437	GO:0006814,GO:1902600	GO:0015297,GO:0015385	GO:0016020	TRUE	-0.786101	0.000249942	0.00263139	Chromosome_I	1067088	1068524	1437	-	13.0974	6059.45	6337.72	7124.4	8223.49	8956.73	10658.8	7767.59	6575.63	6373.25	10192.9	11017.2	10654.3	5529.32	6033.61	6770.4	14555.4	13974.2	13367.5	11034.8	10825.9	10182.9	173.754	182.271	206.934	308.293	322.282	363.066	257.373	198.847
pgaptmp_001858	pgaptmp_001858	pgaptmp_001858	protein_coding	protein_coding	pgaptmp_001858	0.4526	612				TRUE	1.43235	0.000250626	0.00263139	Chromosome_I	1989084	1989695	612	-	6.3072	378.523	299.24	199.307	251.119	243.734	153.388	123.99	200.754	227.314	18.162	41.7248	14.8207	23.5666	32.1882	36.8887	21.9107	22.6356	26.4598	87.1744	94.9364	117.14	25.4859	20.2074	13.5929	22.1051	20.5925	12.268	9.64649	14.2545
pgaptmp_000608	pgaptmp_000608	coaE	protein_coding	protein_coding	pgaptmp_000608	0.4341	615	GO:0015937	GO:0004140,GO:0005524	GO:0005737	TRUE	0.652194	0.000250632	0.00263139	Chromosome_I	611925	612539	615	-	10.6464	2359.79	2402.72	2468.46	1439.45	1439.19	1312.05	1902.18	1864.25	1925.49	1434.8	1338.82	1459.84	1736.57	1659.35	1623.1	1125.87	1267.59	1313.73	1379.14	1505.6	1493.75	158.109	161.462	167.53	126.091	121.001	104.426	147.268	131.725
pgaptmp_001113	pgaptmp_001113	pgaptmp_001113	protein_coding	protein_coding	pgaptmp_001113	0.4105	363				TRUE	-0.95488	0.000255763	0.00267991	Chromosome_I	1185056	1185418	363	+	9.27429	333.81	418.936	459.059	796.917	604.216	1193.3	671.181	434.345	507.411	766.841	901.618	652.112	558.234	370.719	403.141	867.999	758.958	732.936	844.362	748.023	655.487	37.8922	47.696	52.7841	118.269	86.0655	160.907	88.0372	51.9955
pgaptmp_001878	pgaptmp_001878	pgaptmp_001878	protein_coding	protein_coding	pgaptmp_001878	0.4596	1743	GO:0055085	GO:0005524,GO:0042626,GO:0140359	GO:0016020	TRUE	0.726854	0.000257664	0.00269016	Chromosome_I	2013032	2014774	1743	+	7.93306	377.752	394.292	374.109	255.603	259.437	238.329	296.983	342.551	329.359	193.728	166.899	170.438	216.518	260.835	223.967	208.994	173.096	170.666	193.907	233.837	224.311	8.93034	9.34894	8.95862	7.9001	7.69624	6.69287	8.11273	8.54014
pgaptmp_001951	pgaptmp_001951	pgaptmp_001951	protein_coding	protein_coding	pgaptmp_001951	0.4661	1461				TRUE	0.74235	0.000257764	0.00269016	Chromosome_I	2107837	2109297	1461	+	8.30164	504.954	521.909	473.762	303.008	288.795	272.141	409.094	408.971	422.256	207.854	195.925	192.669	271.016	319.662	314.871	273.041	268.964	382.344	259.288	306.473	280.804	14.2416	14.7634	13.5348	11.173	10.2207	9.1175	13.3323	12.1641
pgaptmp_001884	pgaptmp_001884	pgaptmp_001884	protein_coding	protein_coding	pgaptmp_001884	0.4633	885				TRUE	-1.01565	0.000258637	0.00269392	Chromosome_I	2024361	2025245	885	-	8.19574	259.801	184.825	239.331	323.507	440.36	331.517	158.886	171.649	193.534	320.863	350.125	333.466	247.45	271.934	208.158	377.538	330.213	361.176	417.431	399.498	530.869	12.0964	8.63094	11.2875	19.6927	25.7282	18.3356	8.5482	8.42819
pgaptmp_002914	pgaptmp_002914	leuB	protein_coding	protein_coding	pgaptmp_002914	0.4716	1092	GO:0009098	GO:0003862		TRUE	0.723811	0.000260381	0.00270673	Chromosome_I	3172247	3173338	1092	+	9.50327	941.297	837.871	910.766	549.002	503.854	420.581	590.996	705.998	712.205	472.213	613.173	465	994.217	1344.13	1350.39	1060.14	1151.75	1151	469.401	519.92	558.285	35.5191	31.71	34.8117	27.0841	23.8576	18.8521	25.7688	28.0943
pgaptmp_004753	pgaptmp_004753	pgaptmp_004753	protein_coding	protein_coding	pgaptmp_004753	0.4783	1242	GO:0030001	GO:0046872,GO:0046873		TRUE	-1.00738	0.000260932	0.00270711	Chromosome_II	1673018	1674259	1242	-	7.63651	117.18	105.614	111.089	231.9	274.457	232.557	143.294	147.021	143.567	260.322	244.906	305.678	169.385	239.746	262.173	205.623	248.992	251.368	239.73	244.031	175.295	3.88768	3.51432	3.73328	10.0587	11.4261	9.16515	5.49338	5.14392
pgaptmp_002142	pgaptmp_002142	pgaptmp_002142	protein_coding	protein_coding	pgaptmp_002142	0.4534	1374		GO:0015288	GO:0009279	TRUE	0.666075	0.000263176	0.00272501	Chromosome_I	2328327	2329700	1374	-	8.02243	424.778	450.62	425.569	304.289	314.738	311.725	322.969	302.251	327.248	133.188	190.483	214.901	190.006	144.292	151.507	190.454	271.627	305.61	245.876	267.606	260.035	12.739	13.5539	12.9278	11.9306	11.8442	11.105	11.192	9.55912
pgaptmp_004674	pgaptmp_004674	pnuC	protein_coding	protein_coding	pgaptmp_004674	0.4512	738	GO:0015890	GO:0015663	GO:0016020	TRUE	-0.982233	0.000264509	0.00273343	Chromosome_II	1587609	1588346	738	-	7.99158	131.828	171.623	159.282	222.932	238.955	266.368	164.083	176.873	133.714	405.619	375.523	450.18	266.597	251.956	279.3	419.673	326.219	343.977	329.139	313.481	244.25	7.36053	9.61082	9.00848	16.2735	16.7419	17.6668	10.5862	10.4146
pgaptmp_003895	pgaptmp_003895	yqfB	protein_coding	protein_coding	pgaptmp_003895	0.4081	321				TRUE	-1.00143	0.000265149	0.00273467	Chromosome_II	663881	664201	321	-	8.66419	269.052	335.325	371.658	468.925	427.389	476.658	441.762	344.79	361.029	399.565	431.761	383.486	259.233	293.023	310.919	525.856	422.087	384.99	742.1	533.938	601.486	34.5374	43.172	48.3258	78.6979	68.8433	72.6834	65.5264	46.6752
pgaptmp_001094	pgaptmp_001094	pgaptmp_001094	protein_coding	protein_coding	pgaptmp_001094	0.4614	1218				TRUE	0.936029	0.000265921	0.00273727	Chromosome_I	1163045	1164262	1218	+	10.7208	2598.01	2474.89	2357.37	1488.13	1544.33	1543.78	1813.08	1918.73	1744.62	799.129	810.912	831.813	1820.52	1634.94	1782.52	3268.06	3142.35	3370.98	967.859	1355.23	1379.1	87.8925	83.975	80.7834	65.8202	65.5598	62.0399	70.8766	68.4549
pgaptmp_001724	pgaptmp_001724	pgaptmp_001724	protein_coding	protein_coding	pgaptmp_001724	0.4621	1662				TRUE	1.06873	0.00026717	0.00274475	Chromosome_I	1820005	1821666	1662	-	10.2233	2470.04	2048.91	1887.7	1102.49	1532.73	1093.51	1282.97	1663.5	1559.53	2026.08	2432.74	2328.71	708.471	594.926	624.473	621.926	750.969	568.885	841.009	860.162	1219.59	61.2393	50.9488	47.4069	35.7361	47.6846	32.2051	36.755	43.4939
pgaptmp_002480	pgaptmp_002480	pgaptmp_002480	protein_coding	protein_coding	pgaptmp_002480	0.4656	1134				TRUE	0.822347	0.000274127	0.00281074	Chromosome_I	2697845	2698978	1134	-	10.7808	3469.15	2902.63	2942.22	2141.55	2358.83	1261.74	1917.02	2962.06	2525.09	2104.78	2053.59	2095.28	795.373	1010.04	858.98	1289.36	1238.3	1112.63	1538.96	1597.99	1895.01	126.057	105.784	108.294	101.737	107.554	54.4616	80.491	113.506
pgaptmp_001859	pgaptmp_001859	pgaptmp_001859	protein_coding	protein_coding	pgaptmp_001859	0.4836	852				TRUE	1.73222	0.000277541	0.00283488	Chromosome_I	1989826	1990677	852	-	7.20915	844.16	543.912	378.193	442.02	534.577	315.848	282.876	545.544	418.737	54.4861	47.1672	44.4622	44.1874	52.167	55.3331	28.6524	41.2767	46.3046	144.732	149.732	203.541	40.8266	26.3834	18.5274	27.949	32.4425	18.1456	15.8085	27.8245
pgaptmp_000915	pgaptmp_000915	pgaptmp_000915	protein_coding	protein_coding	pgaptmp_000915	0.4875	1116	GO:0006482,GO:0006935,GO:0018277	GO:0000156,GO:0008984,GO:0050568	GO:0005737	TRUE	0.947927	0.000277998	0.00283488	Chromosome_I	963109	964224	1116	+	12.378	5353.29	4598.61	4458.26	1992.29	3154.89	2378.34	2982.45	4578.54	3565.25	7728.95	10685.2	10559.8	11580	8219.08	9443.51	12406.5	12062.1	14412.6	2091.63	2156.14	2901.92	197.658	170.296	166.741	96.173	146.172	104.314	127.245	178.279
pgaptmp_004173	pgaptmp_004173	pgaptmp_004173	protein_coding	protein_coding	pgaptmp_004173	0.3753	762				TRUE	-1.08552	0.000278098	0.00283488	Chromosome_II	1012752	1013513	762	+	8.72024	207.378	274.596	251.584	476.613	477.228	607.781	335.591	266.428	303.32	603.383	553.307	444.622	346.135	422.886	403.141	854.516	551.243	477.599	625.867	433.904	441.145	11.2142	14.893	13.7806	33.6957	32.3828	39.0413	20.9695	15.1937
pgaptmp_003483	pgaptmp_003483	pgaptmp_003483	protein_coding	protein_coding	pgaptmp_003483	0.4768	1011				TRUE	-0.708363	0.000282583	0.00286876	Chromosome_II	229856	230866	1011	+	8.06856	154.955	155.781	169.084	238.306	269.678	265.543	233.132	220.904	242.797	236.106	402.735	364.96	481.643	482.822	443.982	232.59	255.649	310.902	235.259	272.703	252.558	6.31559	6.36802	6.98059	12.6984	13.7924	12.8563	10.9795	9.4949
pgaptmp_005110	pgaptmp_005110	pgaptmp_005110	protein_coding	protein_coding	pgaptmp_005110	0.4461	612	GO:0006865		GO:0016020	TRUE	-0.775304	0.000282797	0.00286876	Chromosome_II	2080838	2081449	612	+	6.11928	43.1717	51.9269	44.9257	96.0913	81.2448	95.6616	82.4128	61.1964	64.0421	82.7381	76.1931	46.3148	63.3353	76.5856	46.1109	91.0135	66.5753	68.7954	77.6746	83.4676	82.2474	2.90674	3.50657	3.06397	8.45857	6.86417	7.65101	6.41174	4.34522
pgaptmp_002196	pgaptmp_002196	pgaptmp_002196	protein_coding	protein_coding	pgaptmp_002196	0.4556	450				TRUE	-1.48007	0.000283059	0.00286876	Chromosome_I	2379372	2379821	450	-	9.90745	277.532	415.415	488.465	1269.69	1202.29	2046.83	1530.95	1263.48	1249.17	970.66	814.541	959.642	1190.11	1143.23	1208.11	925.304	1047.9	748.812	1313.76	1054.5	782.596	25.4132	38.1515	45.3066	152.002	138.146	222.639	161.987	122.01
pgaptmp_004800	pgaptmp_004800	pgaptmp_004800	protein_coding	protein_coding	pgaptmp_004800	0.4679	1872	GO:0006935			TRUE	-0.774551	0.000283936	0.00286876	Chromosome_II	1725809	1727680	1872	+	9.5907	531.166	606.401	513.787	629.078	686.143	503.873	743.2	879.139	774.839	1309.68	1434.97	1411.67	653.974	801.374	752.266	648.893	655.101	701.184	902.478	790.712	1020.2	11.6918	13.3874	11.4556	18.1035	18.9519	13.1749	18.9031	20.4075
pgaptmp_004489	pgaptmp_004489	pgaptmp_004489	protein_coding	protein_coding	pgaptmp_004489	0.4304	1545	GO:0000160			TRUE	0.719351	0.000284149	0.00286876	Chromosome_II	1365369	1366913	1545	+	8.94583	1008.37	1130.95	1149.28	1180	985.179	840.337	1424.03	1367.22	1439.19	223.998	174.156	207.49	206.208	179.81	191.031	242.703	182.416	148.175	666.661	642.255	581.547	26.8936	30.2522	31.0484	41.1451	32.9709	26.6231	43.8858	38.4545
pgaptmp_001233	pgaptmp_001233	pgaptmp_001233	protein_coding	protein_coding	pgaptmp_001233	0.4395	405				TRUE	-1.31263	0.000286447	0.00288583	Chromosome_I	1315727	1316131	405	+	12.6285	2685.12	3643.68	3848.09	5777.01	4941.6	10589.6	3992.19	2806.83	2875.56	9730.81	9779.93	12534.6	8183.51	7756.24	8878.32	8772.69	9737.3	6728.72	10386.6	7187.13	6403.66	273.192	371.815	396.58	768.444	630.894	1279.84	469.342	301.16
pgaptmp_004222	pgaptmp_004222	pgaptmp_004222	protein_coding	protein_coding	pgaptmp_004222	0.4816	897				TRUE	-0.666167	0.000286937	0.00288583	Chromosome_II	1071515	1072411	897	-	9.08269	376.21	381.091	411.683	702.748	828.833	553.353	418.003	476.138	471.519	803.165	803.656	926.295	595.057	628.224	748.314	281.468	327.55	437.909	595.692	609.76	573.239	17.2821	17.5581	19.1563	42.2057	47.777	30.1955	22.1881	23.0663
pgaptmp_000236	pgaptmp_000236	pgaptmp_000236	protein_coding	protein_coding		0.5	1000				TRUE	-1.21469	0.000288239	0.00289339	pgaptmp_000236	1	1000	1000	+	12.3432	1615.85	1569.25	2041.26	2874.41	2902.97	5684.44	1466.35	1461.25	1380.07	18846.1	21043.8	22097.7	12214.9	8618.66	9647.71	18098.2	14332.3	11823.6	4991.29	3334.24	3220.11	66.5825	64.8535	85.1999	154.851	150.102	278.241	69.8186	63.4983
pgaptmp_001764	pgaptmp_001764	pgaptmp_001764	protein_coding	protein_coding	pgaptmp_001764	0.4734	1542	GO:0006355	GO:0005524		TRUE	0.741915	0.000288826	0.00289376	Chromosome_I	1860247	1861788	1542	+	6.99028	198.127	194.506	228.713	147.34	159.759	161.635	161.113	158.961	161.161	117.044	99.7767	88.9244	89.8477	118.763	110.666	80.9009	81.2219	76.7334	112.321	105.131	128.771	5.29441	5.21303	6.1908	5.14755	5.35703	5.13079	4.97485	4.47966
pgaptmp_002272	pgaptmp_002272	pgaptmp_002272	protein_coding	protein_coding	pgaptmp_002272	0.4517	1935		GO:0004672		TRUE	0.766118	0.000289765	0.00289471	Chromosome_I	2465159	2467093	1935	+	8.8923	794.821	862.515	826.633	722.606	697.067	519.541	545.706	620.174	570.045	240.142	279.375	314.94	402.105	370.719	364.935	360.683	403.446	338.685	448.725	513.549	417.883	16.9257	18.4216	17.8309	20.118	18.6268	13.1423	13.428	13.9274
pgaptmp_001950	pgaptmp_001950	pgaptmp_001950	protein_coding	protein_coding	pgaptmp_001950	0.467	1377	GO:0055085	GO:0015297,GO:0042910	GO:0016020	TRUE	0.748746	0.000290022	0.00289471	Chromosome_I	2106365	2107741	1377	-	8.6509	589.756	561.515	619.975	281.227	308.594	336.465	367.516	361.954	393.402	373.331	402.735	376.076	486.062	461.734	451.887	441.584	374.153	428.648	287.787	337.693	373.021	17.648	16.8527	18.7923	11.0024	11.5877	11.9602	12.7079	11.4224
pgaptmp_000239	pgaptmp_000239	pgaptmp_000239	protein_coding	protein_coding		0.5	1000				TRUE	-1.06776	0.000295093	0.00293975	pgaptmp_000239	1	1000	1000	+	11.9105	1164.09	1209.28	1281.61	1438.17	1895.26	3195.59	991.181	1032.13	838.178	14773.8	19055.5	18866.8	11743.5	7485.41	8799.27	16840.9	13556.1	11278.5	3104.75	2153.59	2044.55	47.9674	49.9768	53.4929	77.4771	97.9968	156.417	47.1939	44.851
pgaptmp_001739	pgaptmp_001739	nagK	protein_coding	protein_coding	pgaptmp_001739	0.4675	909		GO:0045127		TRUE	0.747762	0.000297301	0.00295562	Chromosome_I	1838759	1839667	909	-	10.941	3461.44	3913	3493.59	2937.83	2835.38	3565.87	3232.66	3327	3002.94	1156.32	1229.97	1194.92	960.34	793.604	779.933	1301.16	1300.88	2171.03	1842.96	2239.61	2076.12	156.91	177.905	160.416	174.111	161.284	192.015	169.328	159.047
pgaptmp_004849	pgaptmp_004849	hutW	protein_coding	protein_coding	pgaptmp_004849	0.4748	1371		GO:0003824,GO:0051536		TRUE	-1.22181	0.000298006	0.00295562	Chromosome_II	1773026	1774396	1371	-	10.2561	991.407	710.254	877.276	1440.73	1746.42	1040.73	867.933	1422.44	1251.99	1519.56	1678.06	1530.24	867.546	977.854	826.044	1122.5	1191.7	1088.82	1528.35	1738.8	2538.87	29.797	21.4101	26.7079	56.6121	65.8651	37.1564	30.1426	45.0853
pgaptmp_005187	pgaptmp_005187	pgaptmp_005187	protein_coding	protein_coding	pgaptmp_005187	0.4856	2259	GO:0009265	GO:0004748	GO:0005971	TRUE	-1.00473	0.000298372	0.00295562	Chromosome_II	2155881	2158139	2259	-	6.76143	67.8412	51.0468	54.7277	88.404	118.112	87.4149	118.051	108.959	115.417	104.936	128.803	96.3347	134.035	119.873	101.444	197.196	159.781	161.405	97.233	127.431	131.263	1.23747	0.933886	1.01119	2.10824	2.70348	1.8941	2.4882	2.09598
pgaptmp_003355	pgaptmp_003355	pgaptmp_003355	protein_coding	protein_coding	pgaptmp_003355	0.4471	756				TRUE	-1.09722	0.000300526	0.00297137	Chromosome_II	91294	92049	756	-	5.99763	35.4624	32.5643	44.1089	73.0294	64.8593	108.856	98.7468	79.1076	84.4511	60.5401	59.866	55.5777	53.0249	55.4968	46.1109	80.9009	49.2657	54.2426	101.145	82.1933	68.1241	1.93288	1.78017	2.43526	5.20403	4.43603	7.04798	6.21919	4.54709
pgaptmp_003734	pgaptmp_003734	pgaptmp_003734	protein_coding	protein_coding	pgaptmp_003734	0.4544	1404				TRUE	-0.72687	0.000301163	0.00297208	Chromosome_II	492240	493643	1404	+	7.31651	150.33	165.462	164.183	295.961	323.614	266.368	282.876	406.732	325.841	86.7742	96.1484	68.5459	83.9561	67.7061	55.3331	102.812	93.2054	134.945	228.553	279.075	263.358	4.41201	4.87049	4.88092	11.3562	11.918	9.28641	9.59317	12.5886
pgaptmp_005032	pgaptmp_005032	pgaptmp_005032	protein_coding	protein_coding	pgaptmp_005032	0.4345	840				TRUE	-0.742299	0.000303208	0.00298666	Chromosome_II	1990755	1991594	840	+	10.244	721.584	712.895	780.073	824.463	1011.8	958.265	980.044	946.306	869.847	2221.82	2289.42	2274.98	1484.7	1763.69	2081.58	1479.81	1330.17	1076.91	1310.41	1135.41	1094.14	35.3969	35.0742	38.7612	52.8757	62.2818	55.8392	55.5519	48.9542
pgaptmp_001455	pgaptmp_001455	ihfA	protein_coding	protein_coding	pgaptmp_001455	0.4646	297	GO:0006310,GO:0006355	GO:0003677		TRUE	-1.20129	0.000305223	0.00299534	Chromosome_I	1506708	1507004	297	+	13.0971	2749.88	4380.34	4213.21	8151.1	8847.49	16135.5	13439.2	10095.9	9171.39	7517.06	9193.97	9075.84	16066.5	9933.93	11095.6	11034.5	12312.4	10251.8	9755.71	7733.82	7256.05	381.519	609.527	592.104	1478.51	1540.31	2659.24	2154.52	1477.16
pgaptmp_003706	pgaptmp_003706	pgaptmp_003706	protein_coding	protein_coding	pgaptmp_003706	0.4412	519		GO:0046872		TRUE	-1.11083	0.000305229	0.00299534	Chromosome_II	465613	466131	519	+	10.1537	661.452	897.719	846.237	1441.37	1517.02	1612.23	1248.81	1063.47	1147.13	1023.13	1311.61	1322.75	1050.19	765.856	907.726	1146.1	1031.92	850.682	1994.95	1636.22	1315.96	52.5157	71.485	68.0558	149.614	151.136	152.052	114.568	89.0425
pgaptmp_001331	pgaptmp_001331	pgaptmp_001331	protein_coding	protein_coding	pgaptmp_001331	0.3844	333				TRUE	0.817926	0.000306072	0.00299803	Chromosome_I	1403246	1403578	333	+	8.3976	447.135	543.032	487.648	474.05	507.268	508.821	475.173	458.227	482.075	371.313	317.471	153.765	279.854	216.438	135.698	417.988	378.148	178.604	300.081	241.483	245.911	55.329	67.3943	61.1228	76.691	78.7657	74.7917	67.9423	59.7962
pgaptmp_002670	pgaptmp_002670	pgaptmp_002670	protein_coding	protein_coding	pgaptmp_002670	0.4714	594				TRUE	-1.18443	0.000310098	0.00303182	Chromosome_I	2890401	2890994	594	-	13.3946	5395.69	6269.07	7237.12	8570.7	8907.57	16090.9	5330.84	4215.84	3941.76	23120.3	25820.4	26921.9	13503.7	12180.4	15571	11385.1	14450.8	10994	16912.9	12968.1	10873.3	374.299	436.173	508.534	777.31	775.384	1325.95	427.309	308.414
pgaptmp_001956	pgaptmp_001956	pgaptmp_001956	protein_coding	protein_coding	pgaptmp_001956	0.4771	1203	GO:0042908,GO:1990961	GO:0042910	GO:0016020	TRUE	0.655409	0.000312299	0.00304767	Chromosome_I	2115279	2116481	1203	-	11.0173	2308.91	2436.16	2602.42	1401.01	1592.81	1681.5	1356.47	1512	1341.37	2599.19	2937.06	3058.63	3071.03	2647.2	2881.27	2497.82	2673.66	2468.7	1437.82	1545.74	1449.71	79.0861	83.6917	90.2928	62.7394	68.4607	68.417	53.688	54.6164
pgaptmp_000685	pgaptmp_000685	pgaptmp_000685	protein_coding	protein_coding	pgaptmp_000685	0.4653	879	GO:0006744			TRUE	0.886652	0.0003133	0.00305177	Chromosome_I	710217	711095	879	-	9.41007	1383.04	1425.79	1310.2	1325.42	1479.47	582.216	748.397	1064.97	1069.01	375.349	375.523	383.486	273.962	308.562	299.062	717.996	636.46	555.655	556.016	766.5	796.719	64.834	67.036	62.2141	81.2323	87.0287	32.4211	40.5393	52.6483
pgaptmp_004010	pgaptmp_004010	pgaptmp_004010	protein_coding	protein_coding	pgaptmp_004010	0.4345	267				TRUE	-0.978497	0.000313964	0.00305259	Chromosome_II	778746	779012	267	-	7.81005	87.1143	125.857	137.228	205.635	258.754	247.401	158.886	134.334	137.937	223.998	234.022	187.112	416.835	471.723	505.902	303.378	331.545	326.778	201.73	239.571	235.111	13.4442	19.4808	21.4522	41.4907	50.1095	45.3547	28.3339	21.8631
pgaptmp_002619	pgaptmp_002619	pgaptmp_002619	protein_coding	protein_coding	pgaptmp_002619	0.4374	423				TRUE	-0.669377	0.000317864	0.00308481	Chromosome_I	2830560	2830982	423	+	9.06946	464.866	498.146	466.41	503.518	528.433	640.768	302.923	273.891	268.836	764.823	562.378	679.901	477.224	570.507	515.124	717.996	671.079	668.109	765.011	662.006	753.519	45.2841	48.6696	46.0224	64.1267	64.5941	74.1469	34.0976	28.1368
pgaptmp_002815	pgaptmp_002815	pgaptmp_002815	protein_coding	protein_coding	pgaptmp_002815	0.4569	429				TRUE	0.669871	0.0003194	0.00309158	Chromosome_I	3058086	3058514	429	+	8.75392	697.685	688.251	647.747	367.069	307.228	329.867	499.674	417.927	427.182	292.611	302.958	264.921	450.712	459.514	449.252	450.011	648.443	480.245	408.49	409.055	392.96	67.0132	66.3027	63.0215	46.0951	37.0295	37.637	55.4577	42.3331
pgaptmp_001883	pgaptmp_001883	fhuB	protein_coding	protein_coding	pgaptmp_001883	0.479	1977		GO:0022857	GO:0016020	TRUE	-0.840774	0.000319738	0.00309158	Chromosome_I	2022385	2024361	1977	-	9.22992	417.84	433.898	578.316	652.78	785.822	731.481	360.834	369.417	358.214	635.671	798.213	653.965	527.303	520.56	451.887	815.751	817.545	763.365	791.275	769.686	896.413	8.70887	9.07031	12.2095	17.7879	20.5523	18.1104	8.69028	8.11985
pgaptmp_003391	pgaptmp_003391	pgaptmp_003391	protein_coding	protein_coding	pgaptmp_003391	0.451	2022		GO:0016747		TRUE	-0.94194	0.000322397	0.00311157	Chromosome_II	129412	131433	2022	+	9.34768	382.378	306.281	302.227	541.314	656.786	517.892	595.451	732.864	669.275	724.463	803.656	809.582	1001.58	880.18	912.996	841.032	900.098	965.782	511.311	648.626	682.902	7.79237	6.26008	6.23869	14.4222	16.7952	12.5369	14.0216	15.75
pgaptmp_002188	pgaptmp_002188	pgaptmp_002188	protein_coding	protein_coding	pgaptmp_002188	0.4076	1494				TRUE	0.726843	0.000323726	0.00311868	Chromosome_I	2368459	2369952	1494	-	8.54342	732.377	926.763	876.459	753.356	678.633	656.436	995.635	861.974	902.923	153.368	186.855	116.713	164.966	136.522	150.19	190.454	171.764	146.852	467.724	449.196	535.023	20.1996	25.6366	24.4862	27.1652	23.487	21.5067	31.7309	25.0715
pgaptmp_002824	pgaptmp_002824	carB	protein_coding	protein_coding	pgaptmp_002824	0.4771	3234	GO:0008152	GO:0005524,GO:0046872		TRUE	1.18866	0.000324633	0.0031217	Chromosome_I	3065412	3068645	3234	-	11.2599	4022.67	3147.3	2729.03	1247.26	1604.41	979.706	1139.67	1920.22	1668.61	3305.49	3526.65	3597.73	5435.05	6025.84	5570.19	2973.11	3083.77	3409.34	1224.91	1181.29	1755.44	51.2546	40.2198	35.2216	20.777	25.6519	14.8282	16.7793	25.8018
pgaptmp_001552	pgaptmp_001552	citE	protein_coding	protein_coding	pgaptmp_001552	0.4703	876	GO:0006084,GO:0006113	GO:0008815	GO:0005737,GO:0009346	TRUE	0.869116	0.00032813	0.00314957	Chromosome_I	1609778	1610653	876	+	4.38589	35.4624	29.924	31.8564	16.6558	23.8955	21.4414	30.4407	19.4037	20.409	14.126	19.9553	11.1155	20.6208	32.1882	36.8887	10.1126	14.6466	17.1989	12.2938	13.3803	15.7848	1.6681	1.41175	1.51787	1.0243	1.41045	1.19807	1.65457	0.96254
pgaptmp_003657	pgaptmp_003657	pgaptmp_003657	protein_coding	protein_coding	pgaptmp_003657	0.4712	399				TRUE	-1.08521	0.000331905	0.00318	Chromosome_II	414868	415266	399	+	8.56358	213.546	344.126	287.524	520.815	385.059	582.216	609.557	443.301	463.074	274.448	295.702	287.152	321.095	303.013	300.379	262.928	330.213	378.375	502.37	528.841	702.841	22.0534	35.644	30.0776	70.3193	49.8998	71.424	72.7402	48.2795
pgaptmp_003836	pgaptmp_003836	pgaptmp_003836	protein_coding	protein_coding	pgaptmp_003836	0.4586	822	GO:0006355			TRUE	-0.690109	0.000334802	0.00320193	Chromosome_II	600903	601724	822	-	8.10751	260.572	327.403	304.678	438.176	456.063	348.835	442.505	449.271	456.036	153.368	175.97	164.881	166.439	189.799	160.729	148.318	191.737	158.759	443.136	458.753	482.684	13.0621	16.4609	15.4707	28.7171	28.6878	20.7721	25.6318	23.7506
pgaptmp_001659	pgaptmp_001659	pgaptmp_001659	protein_coding	protein_coding	pgaptmp_001659	0.464	750		GO:0005524,GO:0016887,GO:0042626,GO:0140359		TRUE	0.690348	0.000337004	0.00321713	Chromosome_I	1744945	1745694	750	-	7.97057	396.254	411.015	441.089	307.492	312.007	319.147	412.064	424.643	354.695	171.53	159.643	192.669	226.829	176.48	192.348	155.06	154.455	117.746	218.495	260.597	250.065	21.7706	22.6484	24.5474	22.087	21.5103	20.8287	26.1599	24.6037
pgaptmp_002720	pgaptmp_002720	ppk1	protein_coding	protein_coding	pgaptmp_002720	0.451	2091	GO:0006799	GO:0008976	GO:0009358	TRUE	0.699741	0.000340299	0.0032427	Chromosome_I	2944925	2947015	2091	+	9.71945	1675.99	1652.86	1473.56	1107.61	1076.66	1139.69	1250.3	1262.74	1339.96	538.807	507.954	533.546	606.84	525	526.982	458.438	460.701	539.78	962.83	941.081	907.213	33.0274	32.6681	29.4141	28.5363	26.6238	26.6788	28.4703	26.2419
pgaptmp_003811	pgaptmp_003811	pgaptmp_003811	protein_coding	protein_coding	pgaptmp_003811	0.412	267				TRUE	-1.29368	0.000342676	0.00325245	Chromosome_II	568128	568394	267	+	7.61165	59.3611	85.3713	100.47	186.417	133.815	200.394	98.0044	70.152	95.7113	437.907	419.062	353.845	187.06	268.605	223.967	591.588	507.304	415.419	251.465	186.687	160.341	9.16112	13.2142	15.706	37.6131	25.9142	36.7373	17.477	11.4174
pgaptmp_003581	pgaptmp_003581	pgaptmp_003581	protein_coding	protein_coding	pgaptmp_003581	0.3886	525				TRUE	-1.02447	0.000343063	0.00325245	Chromosome_II	334500	335024	525	+	7.86601	111.013	121.456	146.213	253.04	176.144	287.809	235.359	163.439	194.238	347.097	257.605	276.036	195.898	245.296	230.554	480.349	370.159	346.623	296.728	252.314	202.711	8.71309	9.56097	11.6243	25.9654	17.3481	26.8336	21.3454	13.528
pgaptmp_002362	pgaptmp_002362	pgaptmp_002362	protein_coding	protein_coding	pgaptmp_002362	0.458	1323			GO:0016020	TRUE	0.757189	0.000343177	0.00325245	Chromosome_I	2570958	2572280	1323	+	7.28516	388.545	411.015	357.772	279.305	260.803	203.693	296.24	297.773	304.024	56.5041	97.9626	70.3985	67.754	71.0359	72.46	85.9572	89.2109	41.0127	200.613	237.66	205.203	12.1015	12.8392	11.2872	11.3732	10.1929	7.53615	10.6615	9.78054
pgaptmp_003562	pgaptmp_003562	pgaptmp_003562	protein_coding	protein_coding	pgaptmp_003562	0.3933	450		GO:0008080,GO:0016746		TRUE	-1.03253	0.000343876	0.00325321	Chromosome_II	316040	316489	450	-	8.327	206.607	253.474	274.455	474.05	379.598	550.054	494.477	356.73	376.511	320.863	261.234	285.299	172.331	199.789	165.999	340.458	303.583	283.12	565.516	494.434	385.483	18.9187	23.2789	25.4566	56.7513	43.6169	59.8309	52.3198	34.4481
pgaptmp_001471	pgaptmp_001471	pgaptmp_001471	protein_coding	protein_coding	pgaptmp_001471	0.4706	1800	GO:0006508	GO:0004222,GO:0008270		TRUE	0.879739	0.000345681	0.00326442	Chromosome_I	1521708	1523507	1800	+	9.59707	967.508	845.792	749.851	503.518	576.224	407.386	541.251	814.211	709.39	928.282	1044.93	1168.98	1422.83	1123.26	1190.98	994.407	1011.94	1090.14	428.049	386.754	510.1	22.1483	19.4193	17.3877	15.0698	16.5525	11.0781	14.3172	19.6563
pgaptmp_004432	pgaptmp_004432	pgaptmp_004432	protein_coding	protein_coding		0.5	1000				TRUE	-1.72132	0.00034809	0.00327826	pgaptmp_004432	1	1000	1000	+	11.5739	1034.58	1178.48	1402.5	2561.15	2989.67	4682.47	1669.04	1625.44	1288.58	6766.37	6908.17	7547.46	3180.02	2901.37	3327.89	6643.99	5043.74	4166.09	5428.84	3581.46	2305.42	42.6306	48.7038	58.5387	137.975	154.585	229.196	79.4695	70.633
pgaptmp_001280	pgaptmp_001280	pgaptmp_001280	protein_coding	protein_coding	pgaptmp_001280	0.4076	579				TRUE	0.941301	0.000348393	0.00327826	Chromosome_I	1365359	1365937	579	-	9.72442	2269.6	3029.36	2377.79	1233.81	1079.4	1368.13	2001.66	1438.86	1602.46	401.583	331.984	348.287	334.351	364.059	317.506	426.415	426.082	325.455	1477.49	1121.4	1193	161.521	216.229	171.41	114.798	96.3931	115.659	164.606	107.989
pgaptmp_004795	pgaptmp_004795	pgaptmp_004795	protein_coding	protein_coding	pgaptmp_004795	0.4662	1287				TRUE	-0.729106	0.000349158	0.00327959	Chromosome_II	1720147	1721433	1287	-	11.7405	2066.07	2095.56	2018.39	2814.83	3548.83	2827.79	2604.54	3041.91	3001.53	3923	4488.14	5296.56	6202.44	4911.47	6265.81	3067.49	3328.76	4504.78	2805.23	3427.27	3562.39	66.1493	67.2919	65.4587	117.825	142.577	107.548	96.3574	102.708
pgaptmp_005171	pgaptmp_005171	pgaptmp_005171	protein_coding	protein_coding	pgaptmp_005171	0.4762	672				TRUE	-1.23554	0.000357104	0.00334825	Chromosome_II	2139003	2139674	672	+	11.9816	2120.81	2980.96	3003.49	4962.15	4426.82	8269.78	5976.78	4577.04	4245.08	2827.22	3042.28	3140.14	3294.91	2866.97	3106.56	4245.61	4909.26	4011.3	7760.76	5434.95	4914.9	130.044	183.328	186.551	397.8	340.617	602.362	423.478	295.974
pgaptmp_005050	pgaptmp_005050	pgaptmp_005050	protein_coding	protein_coding	pgaptmp_005050	0.4483	348		GO:0003677		TRUE	-1.31826	0.000358234	0.00335287	Chromosome_II	2014305	2014652	348	-	9.49733	319.162	440.058	421.485	494.55	461.525	882.395	562.04	364.193	377.215	849.579	878.035	991.136	815.994	722.569	861.615	1958.48	1291.56	1590.23	1249.5	863.985	704.503	37.7912	52.2604	50.5526	76.5588	68.5741	124.113	76.899	45.4768
pgaptmp_003499	pgaptmp_003499	pgaptmp_003499	protein_coding	protein_coding	pgaptmp_003499	0.4476	420				TRUE	1.04057	0.000359815	0.00336168	Chromosome_II	250012	250431	420	-	7.30445	181.938	203.307	148.663	78.1542	73.052	85.7655	77.958	58.2112	73.191	294.629	560.564	292.709	349.081	257.505	208.158	234.276	463.364	306.933	68.1748	95.5736	72.278	17.8497	20.0053	14.7739	10.0246	8.99346	9.99531	8.8378	6.02275
pgaptmp_003312	pgaptmp_003312	pgaptmp_003312	protein_coding	protein_coding	pgaptmp_003312	0.4745	822				TRUE	-0.715734	0.000363017	0.00338558	Chromosome_II	49281	50102	822	-	7.22159	110.242	127.617	104.554	209.479	176.144	166.583	175.962	174.634	153.42	98.8822	130.617	146.355	117.833	136.522	139.65	203.938	119.836	142.883	176.584	185.413	187.757	5.52629	6.4162	5.30898	13.7288	11.08	9.91955	10.1925	9.23195
pgaptmp_004365	pgaptmp_004365	vxrA	protein_coding	protein_coding	pgaptmp_004365	0.4444	1422				TRUE	-0.618009	0.000366033	0.00340274	Chromosome_II	1228473	1229894	1422	-	11.0318	1362.99	1335.14	1337.15	2147.32	2470.11	2271.96	1906.63	2009.78	2049.35	2669.82	2490.79	2790	3025.36	2846.99	3179.02	1614.65	1880.09	1993.74	1972.04	1861.14	2089.42	39.4959	38.8032	39.2484	81.3507	89.8176	78.2049	63.841	61.4167
pgaptmp_004937	pgaptmp_004937	pgaptmp_004937	protein_coding	protein_coding	pgaptmp_004937	0.4647	1005	GO:0006146	GO:0000034		TRUE	-0.735503	0.000366151	0.00340274	Chromosome_II	1867280	1868284	1005	+	8.82284	343.832	359.088	347.153	572.063	593.292	347.185	430.625	479.123	506.003	395.529	457.159	426.096	427.145	570.507	463.744	426.415	416.761	402.189	571.663	605.299	500.13	14.0974	14.7664	14.4177	30.665	30.5243	16.9094	20.4017	20.7166
pgaptmp_001704	pgaptmp_001704	pgaptmp_001704	protein_coding	protein_coding	pgaptmp_001704	0.4676	678				TRUE	0.645951	0.000369491	0.00342773	Chromosome_I	1800840	1801517	678	+	8.91342	639.095	641.605	623.242	493.909	528.433	448.62	446.959	467.929	454.629	423.781	556.935	431.654	480.17	491.702	526.982	379.223	484.668	568.885	390.608	391.852	368.867	38.8413	39.1093	38.3679	39.2448	40.2999	32.3878	31.3885	29.9908
pgaptmp_001371	pgaptmp_001371	pgaptmp_001371	protein_coding	protein_coding	pgaptmp_001371	0.4331	411				TRUE	0.70574	0.00037219	0.00344532	Chromosome_I	1436971	1437381	411	+	7.34267	208.149	198.026	236.881	202.432	192.53	183.901	184.129	244.039	191.423	135.206	154.2	122.271	119.306	155.391	115.936	151.689	183.748	136.268	124.056	124.883	117.971	20.8685	19.9124	24.0563	26.534	24.2214	21.9016	21.3311	25.8021
pgaptmp_004675	pgaptmp_004675	pgaptmp_004675	protein_coding	protein_coding	pgaptmp_004675	0.3881	219				TRUE	-1.02514	0.000372697	0.00344532	Chromosome_II	1588505	1588723	219	-	7.90267	196.585	225.31	209.926	195.386	154.297	289.459	277.679	161.2	190.719	365.259	230.393	372.371	125.198	168.71	183.126	303.378	186.411	257.983	477.783	447.284	315.697	36.9884	42.5185	40.0094	48.0632	36.4298	64.6957	60.3715	31.986
pgaptmp_003531	pgaptmp_003531	pgaptmp_003531	protein_coding	protein_coding	pgaptmp_003531	0.4501	942		GO:0003677,GO:0003700		TRUE	-0.82368	0.000377407	0.00348274	Chromosome_II	284282	285223	942	+	7.96616	220.484	214.749	217.277	295.961	292.208	162.46	237.586	285.832	311.062	250.232	241.278	255.658	185.587	256.395	212.11	205.623	195.731	216.97	322.992	339.605	460.253	9.6446	9.42152	9.62728	16.9258	16.0393	8.44165	12.0089	13.1855
pgaptmp_001861	pgaptmp_001861	pgaptmp_001861	protein_coding	protein_coding	pgaptmp_001861	0.4861	2448	GO:0009061	GO:0009055,GO:0009389,GO:0030151,GO:0043546,GO:0051539		TRUE	1.14996	0.000382398	0.00352261	Chromosome_I	1991306	1993753	2448	-	8.89042	3646.46	2774.13	2234.03	2114.01	2900.23	2057.55	2006.12	3113.55	2756.63	48.4321	88.892	66.6933	69.2269	75.4757	77.7298	50.5631	43.9397	56.8885	1072.92	1280.05	1375.77	61.3789	46.8335	38.0907	46.5221	61.2584	41.1407	39.0192	55.2691
pgaptmp_004158	pgaptmp_004158	pgaptmp_004158	protein_coding	protein_coding	pgaptmp_004158	0.4106	453		GO:0003677		TRUE	-1.1761	0.000390579	0.00359169	Chromosome_II	995957	996409	453	-	7.37959	92.5107	124.977	131.51	252.4	259.437	337.289	431.368	319.415	305.432	121.08	186.855	83.3666	89.8477	85.4651	61.9203	163.487	118.504	97.9012	321.875	251.677	198.557	8.41496	11.4018	12.1172	30.0161	29.6127	36.4449	45.3401	30.6405
pgaptmp_003779	pgaptmp_003779	pgaptmp_003779	protein_coding	protein_coding	pgaptmp_003779	0.4459	924	GO:0055085	GO:0022857	GO:0016020	TRUE	0.953442	0.00039273	0.00360517	Chromosome_II	534926	535849	924	+	7.2458	168.061	225.31	160.099	84.5603	86.0239	108.032	122.505	132.095	116.12	157.404	156.014	140.797	310.785	266.385	270.078	274.726	263.638	166.697	73.7629	88.5649	100.525	7.49469	10.0774	7.23198	4.93014	4.81383	5.72284	6.31272	6.21228
pgaptmp_001932	pgaptmp_001932	pgaptmp_001932	protein_coding	protein_coding	pgaptmp_001932	0.4418	498	GO:0000160			TRUE	0.67674	0.000393482	0.00360577	Chromosome_I	2083765	2084262	498	+	8.5098	1002.2	925.883	1003.89	862.9	750.32	582.216	852.341	1040.34	1027.49	106.954	116.104	94.4821	136.981	132.082	151.507	106.182	154.455	174.635	524.164	614.857	603.147	82.9245	76.8366	84.1387	93.3459	77.9042	57.2252	81.4923	90.7785
pgaptmp_001702	pgaptmp_001702	pgaptmp_001702	protein_coding	protein_coding	pgaptmp_001702	0.4514	2364				TRUE	0.638163	0.000396475	0.00362688	Chromosome_I	1798288	1800651	2364	+	10.5207	1817.84	2156.29	2051.88	1626.51	1628.31	1776.34	1903.66	1914.25	1738.29	1295.56	1413.2	1161.57	1440.51	1305.29	1237.09	1087.11	937.38	1427.51	1241.68	1225.25	1210.45	31.6859	37.6965	36.2281	37.0657	35.615	36.7799	38.342	35.1876
pgaptmp_001545	pgaptmp_001545	pgaptmp_001545	protein_coding	protein_coding	pgaptmp_001545	0.4626	1656				TRUE	0.717324	0.000397633	0.00363081	Chromosome_I	1601549	1603204	1656	-	7.68379	620.593	760.421	740.049	470.847	477.228	386.77	423.201	430.614	463.074	68.6121	58.0519	46.3148	63.3353	91.0148	61.9203	69.1029	50.5972	80.7023	360.433	424.984	435.329	15.442	18.9773	18.6527	15.3174	14.9008	11.4321	12.168	11.2997
pgaptmp_000996	pgaptmp_000996	pgaptmp_000996	protein_coding	protein_coding	pgaptmp_000996	0.4733	1965	GO:0006261,GO:0006265,GO:0006310,GO:0051304	GO:0003917,GO:0098847		TRUE	0.682588	0.000398927	0.00363081	Chromosome_I	1055505	1057469	1965	+	11.0751	2773.78	2516.25	2570.57	1190.89	1422.13	1213.91	1406.21	1563.49	1549.68	2968.48	3439.57	2990.08	2889.86	2942.44	2987.99	3200.64	2962.6	2943.65	1445.64	1493.5	1734.67	58.1658	52.9217	54.6018	32.6493	37.4213	30.2383	34.0739	34.5757
pgaptmp_003476	pgaptmp_003476	pgaptmp_003476	protein_coding	protein_coding	pgaptmp_003476	0.4497	507		GO:0016747		TRUE	-0.881955	0.0003992	0.00363081	Chromosome_II	224912	225418	507	-	6.92111	82.4887	85.3713	84.1336	126.84	147.47	150.914	142.552	131.348	140.048	137.224	101.591	127.829	114.887	92.1247	110.666	92.699	131.819	121.715	184.966	136.352	137.91	6.70417	6.95898	6.92632	13.4777	15.0397	14.5699	13.3874	11.2578
pgaptmp_004031	pgaptmp_004031	arfB	protein_coding	protein_coding	pgaptmp_004031	0.4469	414	GO:0006415	GO:0003747		TRUE	-0.709455	0.00040025	0.00363081	Chromosome_II	802014	802427	414	-	8.67157	442.51	578.237	553.811	824.463	761.926	827.967	910.253	797.046	782.581	280.502	197.739	285.299	164.966	256.395	212.11	77.53	142.471	169.343	833.745	789.438	839.92	44.0434	57.7227	55.8345	107.284	95.1604	97.8916	104.687	83.6605
pgaptmp_000698	pgaptmp_000698	deoC	protein_coding	protein_coding	pgaptmp_000698	0.4517	777	GO:0009264	GO:0004139	GO:0005737	TRUE	0.787057	0.000401514	0.00363081	Chromosome_I	723188	723964	777	+	14.1474	30345.1	31370.9	31010.2	16881.3	17750.3	18015.7	29831.2	27816	26626	9430.13	11566.8	10995.1	8050.95	8737.42	9140.49	25898.4	20361.4	38424.9	18455.3	16236.7	16488.5	1609.26	1668.58	1665.8	1170.44	1181.21	1134.91	1828.03	1555.65
pgaptmp_001946	pgaptmp_001946	nhaA	protein_coding	protein_coding	pgaptmp_001946	0.4728	1176	GO:0006814,GO:0006885	GO:0015385	GO:0016020	TRUE	0.844785	0.000402113	0.00363081	Chromosome_I	2100499	2101674	1176	-	11.8552	1941.18	2240.78	2525.64	1536.82	1332.69	1976.73	2136.05	2012.77	1819.92	10061.8	10331.4	10972.9	12471.2	10981.7	11907.1	8732.24	9945.02	9628.71	1328.29	1173.64	1033.49	68.017	78.7468	89.6407	70.4012	58.5956	82.276	86.4842	74.3744
pgaptmp_000637	pgaptmp_000637	pgaptmp_000637	protein_coding	protein_coding	pgaptmp_000637	0.4173	369				TRUE	-0.974059	0.000402805	0.00363081	Chromosome_I	650121	650489	369	+	9.23749	258.259	322.123	325.916	449.707	371.405	916.207	327.424	260.458	237.167	972.678	1168.29	1350.54	899.95	707.029	728.552	1574.2	1348.82	1057.07	689.572	542.858	476.038	28.8395	36.0775	36.8655	65.655	52.0433	121.535	42.249	30.6725
pgaptmp_005210	pgaptmp_005210	pgaptmp_005210	protein_coding	protein_coding	pgaptmp_005210	0.4472	597	GO:0006355	GO:0003677,GO:0003700		TRUE	-0.772289	0.000403742	0.00363081	Chromosome_II	2181428	2182024	597	-	8.24719	189.647	178.664	198.49	212.041	277.188	316.673	205.661	164.932	171.717	518.627	647.641	579.861	360.864	335.201	334.633	482.035	415.43	367.791	352.05	303.924	279.973	13.0897	12.3681	13.8773	19.1342	24.0073	25.9639	16.4025	12.0051
pgaptmp_003548	pgaptmp_003548	pgaptmp_003548	protein_coding	protein_coding	pgaptmp_003548	0.4432	810	GO:0008643		GO:0042597	TRUE	-0.795306	0.000404153	0.00363081	Chromosome_II	303800	304609	810	+	9.79301	800.218	654.807	830.717	1217.8	1170.2	1206.49	1253.27	1213.48	1181.61	732.535	763.745	639.144	528.776	697.04	702.203	625.297	660.427	762.042	1374.67	1223.98	1197.16	40.7082	33.4095	42.8064	80.9942	74.6996	72.9074	73.6702	65.1006
pgaptmp_002273	pgaptmp_002273	pgaptmp_002273	protein_coding	protein_coding	pgaptmp_002273	0.4756	1272				TRUE	0.812516	0.000405432	0.00363081	Chromosome_I	2467139	2468410	1272	+	6.77977	122.577	124.096	103.738	58.2954	79.8793	38.7594	51.972	88.8094	70.376	131.17	179.598	175.996	225.356	174.26	204.205	193.825	211.709	209.032	53.087	59.8928	68.9549	3.97081	4.03194	3.404	2.46894	3.24707	1.4915	1.94543	3.03396
pgaptmp_003331	pgaptmp_003331	pgaptmp_003331	protein_coding	protein_coding	pgaptmp_003331	0.4411	705				TRUE	-0.929345	0.000405465	0.00363081	Chromosome_II	66463	67167	705	-	7.23708	95.5944	106.494	115.99	205.635	185.02	239.979	222.737	146.274	140.048	139.242	130.617	120.418	129.616	132.082	135.698	138.206	154.455	121.715	234.7	194.97	163.664	5.5873	6.24278	6.86708	15.7135	13.5698	16.6616	15.0431	9.01606
pgaptmp_002778	pgaptmp_002778	pgaptmp_002778	protein_coding	protein_coding	pgaptmp_002778	0.4531	1035		GO:0047834		TRUE	0.658881	0.000405614	0.00363081	Chromosome_I	3008346	3009380	1035	+	11.1889	6653.06	7679.9	7035.36	5600.84	4801.64	3072.72	6553.67	7130.88	6863.06	653.833	571.448	553.925	908.788	1300.85	1123.79	635.409	637.791	632.389	4154.19	4278.51	4457.97	264.874	306.66	283.718	291.526	239.879	145.316	301.493	299.392
pgaptmp_003518	pgaptmp_003518	pgaptmp_003518	protein_coding	protein_coding	pgaptmp_003518	0.4648	327				TRUE	-1.02009	0.000405878	0.00363081	Chromosome_II	271406	271732	327	-	7.76977	136.453	200.667	167.45	319.664	281.967	363.679	332.621	255.234	275.17	159.422	159.643	148.207	150.237	142.072	138.333	235.961	177.09	206.386	395.638	307.747	288.281	17.1947	25.3612	21.3737	52.6635	44.5856	54.4381	48.4322	33.9178
pgaptmp_001901	pgaptmp_001901	pgaptmp_001901	protein_coding	protein_coding	pgaptmp_001901	0.4723	1338				TRUE	1.78198	0.000408079	0.00364431	Chromosome_I	2043506	2044843	1338	-	7.60359	1085.46	778.903	631.41	509.284	602.85	276.264	455.869	866.452	778.358	60.5401	48.9813	51.8725	54.4978	88.7949	79.0472	30.3378	62.5808	62.1805	134.673	229.377	322.343	33.4284	24.0585	19.6968	20.5054	23.2968	10.1065	16.2225	28.1401
pgaptmp_001560	pgaptmp_001560	pgaptmp_001560	protein_coding	protein_coding	pgaptmp_001560	0.4463	912				TRUE	0.892488	0.000412669	0.00367905	Chromosome_I	1618898	1619809	912	-	6.6462	240.528	250.833	189.505	142.856	114.699	125.35	144.037	118.661	116.12	76.6841	67.1225	77.8088	78.0644	39.9577	60.6029	58.9902	54.5917	50.2736	126.85	107.68	104.678	10.8675	11.3666	8.67294	8.43853	6.5029	6.72761	7.51988	5.65395
pgaptmp_004242	pgaptmp_004242	pgaptmp_004242	protein_coding	protein_coding	pgaptmp_004242	0.4667	315		GO:0022857		TRUE	-0.756158	0.000413976	0.00368446	Chromosome_II	1094540	1094854	315	+	7.4895	90.198	110.895	97.2029	162.074	161.807	246.576	206.403	135.08	135.122	232.07	208.624	185.259	250.395	224.207	217.38	262.928	233.014	277.828	159.261	147.183	189.418	11.799	14.5493	12.8798	27.7183	26.5601	38.3154	31.1988	18.6345
pgaptmp_000286	pgaptmp_000286	pgaptmp_000286	protein_coding	protein_coding	pgaptmp_000286	0.4965	987				TRUE	-0.981098	0.000417525	0.00370976	Chromosome_I	300580	301566	987	-	10.7864	1218.06	1510.28	1467.85	2076.21	1829.71	2319.79	1738.84	1513.49	1551.09	1896.92	1692.58	1850.74	1198.95	1266.44	1297.69	2347.81	1866.77	1752.96	3227.69	2454.97	2198.25	50.8521	63.2386	62.0732	113.323	95.854	115.044	83.883	66.6347
pgaptmp_002620	pgaptmp_002620	pgaptmp_002620	protein_coding	protein_coding	pgaptmp_002620	0.462	303				TRUE	-0.806853	0.000420544	0.00373029	Chromosome_I	2831072	2831374	303	-	10.9279	991.407	1388.82	1174.6	1361.93	1220.72	2468.23	1264.4	660.474	855.772	4052.15	3677.22	4801.92	2312.47	2034.51	2192.24	4390.56	3153.01	3204.28	2125.71	1807.62	1998.86	134.824	189.429	161.804	242.146	208.313	398.728	198.69	94.7219
pgaptmp_004780	pgaptmp_004780	pgaptmp_004780	protein_coding	protein_coding	pgaptmp_004780	0.4381	420		GO:0016747		TRUE	-1.14994	0.000426705	0.00377471	Chromosome_II	1706294	1706713	420	-	8.21099	86.3433	149.62	132.327	306.211	266.264	483.256	262.087	191.799	209.017	482.303	417.248	461.295	434.51	347.41	313.554	535.968	545.917	443.201	316.845	237.66	245.081	8.47106	14.7225	13.1504	39.2768	32.7799	56.3197	29.7118	19.8442
pgaptmp_003736	pgaptmp_003736	pgaptmp_003736	protein_coding	protein_coding	pgaptmp_003736	0.4415	1137				TRUE	-0.838565	0.00042739	0.00377471	Chromosome_II	494919	496055	1137	+	6.82049	86.3433	116.175	111.906	171.042	185.702	145.142	190.069	206.725	182.274	56.5041	112.476	70.3985	57.4436	61.0465	85.6345	55.6194	70.5698	88.6403	156.467	194.97	201.049	3.12915	4.22275	4.10803	8.10416	8.44503	6.24834	7.95946	7.90076
pgaptmp_000623	pgaptmp_000623	pgaptmp_000623	protein_coding	protein_coding	pgaptmp_000623	0.4346	918		GO:0005524		TRUE	0.627385	0.000427705	0.00377471	Chromosome_I	630877	631794	918	+	10.0413	1693.72	1799.84	1664.7	1028.82	1051.4	926.928	1193.87	1361.25	1245.65	1023.13	1153.78	1213.45	919.098	818.023	853.71	564.621	737.654	629.743	974.565	1086.99	1116.57	76.025	81.0275	75.6893	60.3754	59.2203	49.4238	61.9224	64.4365
pgaptmp_004259	pgaptmp_004259	pgaptmp_004259	protein_coding	protein_coding	pgaptmp_004259	0.4674	261				TRUE	-0.609029	0.000436468	0.0038456	Chromosome_II	1108437	1108697	261	+	7.65406	191.96	209.468	205.025	356.819	244.417	331.517	421.716	219.412	327.952	119.062	97.9626	85.2192	67.754	102.114	75.0949	315.176	209.046	332.07	297.287	280.349	315.697	30.306	33.1679	32.7873	73.6498	48.4211	62.1724	76.9329	36.5306
pgaptmp_000238	pgaptmp_000238	pgaptmp_000238	protein_coding	protein_coding		0.5	1000				TRUE	-1.1836	0.000438196	0.00385437	pgaptmp_000238	1	1000	1000	+	11.9019	1153.3	1099.27	1291.41	1588.71	1981.28	3635.96	931.784	1036.61	880.403	13575.1	16802.4	17940.5	11490.2	7239	8353.97	15767.2	13514.8	11549.7	3450.65	2064.39	2163.35	47.5227	45.4302	53.902	85.5872	102.445	177.972	44.3658	45.0455
pgaptmp_003641	pgaptmp_003641	pgaptmp_003641	protein_coding	protein_coding	pgaptmp_003641	0.4265	612				TRUE	-1.42038	0.000440512	0.00386827	Chromosome_II	397397	398008	612	-	12.081	2086.89	2870.06	2941.41	5551.51	6010.75	8731.59	4684.91	3505.36	3499.09	3830.17	4368.4	3840.42	3643.99	3329.81	3661.2	5563.62	5037.09	3710.98	9157.78	6079.12	4798.59	140.51	193.812	200.606	488.68	507.833	698.353	364.487	248.896
pgaptmp_004219	pgaptmp_004219	pgaptmp_004219	protein_coding	protein_coding	pgaptmp_004219	0.3979	480				TRUE	-0.894899	0.000442856	0.00388237	Chromosome_II	1069217	1069696	480	-	8.70757	358.479	441.819	425.569	620.109	552.328	635.819	454.384	377.627	460.259	429.835	475.3	422.391	263.652	338.531	324.094	215.736	237.008	190.51	858.891	706.607	615.609	30.7738	38.0403	37.0058	69.5971	59.4976	64.8374	45.0728	34.1868
pgaptmp_000305	pgaptmp_000305	argE	protein_coding	protein_coding	pgaptmp_000305	0.4679	1137	GO:0006526	GO:0019213		TRUE	1.03166	0.00044422	0.0038839	Chromosome_I	321020	322156	1137	-	11.4261	4626.31	4605.65	5223.63	3634.81	3822.6	2512.77	4580.22	5055.42	4960.8	1172.46	1384.17	1230.12	1863.24	1772.57	2176.43	2748.95	2894.69	3127.55	1635.64	2677.34	2419.24	167.661	167.406	191.758	172.221	173.837	108.174	191.804	193.212
pgaptmp_005230	pgaptmp_005230	pgaptmp_005230	protein_coding	protein_coding	pgaptmp_005230	0.4718	426				TRUE	-0.790017	0.000444507	0.0038839	Chromosome_II	2209036	2209461	426	+	7.20168	127.202	128.497	103.738	206.917	178.192	161.635	191.554	190.306	183.681	149.332	145.13	109.303	116.36	159.831	118.571	84.2718	109.183	107.162	179.937	208.988	220.988	12.3039	12.4659	10.1641	26.1668	21.6284	18.572	21.4099	19.4124
pgaptmp_004319	pgaptmp_004319	pgaptmp_004319	protein_coding	protein_coding	pgaptmp_004319	0.4578	699				TRUE	-0.818889	0.000447031	0.00389917	Chromosome_II	1177054	1177752	699	+	6.96648	87.1143	79.2105	66.1633	139.012	182.971	121.226	108.399	90.302	114.713	102.918	177.784	161.175	129.616	154.281	180.491	148.318	103.857	141.56	143.614	131.254	132.925	5.13535	4.68325	3.95076	10.7137	13.5347	8.48892	7.3838	5.61381
pgaptmp_004688	pgaptmp_004688	pgaptmp_004688	protein_coding	protein_coding	pgaptmp_004688	0.4583	408				TRUE	-1.25421	0.000448288	0.00389917	Chromosome_II	1602111	1602518	408	+	8.5034	244.383	314.202	286.708	624.593	638.352	766.117	417.261	336.58	327.952	343.061	322.914	268.626	169.385	320.772	300.379	267.984	241.003	223.585	846.597	628.237	462.745	24.6813	31.8266	29.3305	82.471	80.8992	91.9111	48.6946	35.8481
pgaptmp_003363	pgaptmp_003363	pgaptmp_003363	protein_coding	protein_coding	pgaptmp_003363	0.4625	774				TRUE	-1.00493	0.000448884	0.00389917	Chromosome_II	99463	100236	774	+	8.08748	207.378	256.114	156.832	389.49	360.481	316.673	392.76	341.058	356.102	230.052	204.996	216.753	207.681	240.856	241.094	195.511	201.057	220.939	393.402	371.463	446.13	11.0403	13.6752	8.45733	27.1094	24.0816	20.0264	24.1612	19.1481
pgaptmp_003158	pgaptmp_003158	uspA	protein_coding	protein_coding	pgaptmp_003158	0.4624	426				TRUE	1.05583	0.000450274	0.00389917	Chromosome_I	3422151	3422576	426	+	11.0831	7052.4	9130.33	10861.4	4912.83	4208.34	6519.01	12060.5	9277.97	8502.12	290.593	370.081	257.51	512.574	405.127	450.569	775.3	814.882	1139.09	4659.92	4189.31	3465.19	682.159	885.765	1064.18	621.278	510.794	749.039	1347.99	946.414
pgaptmp_000237	pgaptmp_000237	pgaptmp_000237	protein_coding	protein_coding		0.5	1000				TRUE	-1.24687	0.000450691	0.00389917	pgaptmp_000237	1	1000	1000	+	12.3579	1633.59	1468.03	1886.88	2388.19	2934.37	5399.93	1367.61	1385.88	1221.02	19665.4	23033.9	23505.7	12731.9	9602.06	10949.4	20562.3	16634.5	14001.2	5099.14	3111.24	3066.41	67.3132	60.6706	78.7563	128.657	151.726	264.314	65.1169	60.2229
pgaptmp_003911	pgaptmp_003911	pgaptmp_003911	protein_coding	protein_coding	pgaptmp_003911	0.3862	246				TRUE	-0.763067	0.000451371	0.00389917	Chromosome_II	682717	682962	246	-	6.58825	77.8632	73.9298	89.8514	155.027	170.682	116.278	152.204	146.274	179.459	66.5941	70.7507	81.514	63.3353	65.4862	63.2378	79.2155	46.6027	60.8575	139.703	142.086	122.956	13.0423	12.4201	15.2451	33.9498	35.8755	23.1364	29.4593	25.8387
pgaptmp_004334	pgaptmp_004334	pgaptmp_004334	protein_coding	protein_coding	pgaptmp_004334	0.4444	621				TRUE	-0.614856	0.000451444	0.00389917	Chromosome_II	1191116	1191736	621	+	8.97349	404.734	422.456	433.737	626.515	679.316	550.879	461.066	467.929	506.003	502.483	428.133	544.662	462.495	562.738	545.426	466.866	380.811	388.959	650.455	581.725	618.932	26.8557	28.1146	29.1525	54.3506	56.5619	43.4207	35.3512	32.7435
pgaptmp_003191	pgaptmp_003191	pgaptmp_003191	protein_coding	protein_coding		0.5	1000				TRUE	-1.65091	0.000453215	0.00390805	pgaptmp_003191	1	1000	1000	+	13.5809	3487.65	3839.95	4801.33	8992.22	9976.04	14621.4	4139.2	4100.91	3515.98	32754.2	45507.2	40199.4	23354.5	15701.2	17705.3	34531.2	28333.1	25332.6	17296.3	11177.7	7584.2	143.712	158.696	200.402	484.43	515.825	715.683	197.083	178.204
pgaptmp_002808	pgaptmp_002808	pgaptmp_002808	protein_coding	protein_coding	pgaptmp_002808	0.441	195				TRUE	0.623332	0.00045485	0.00390812	Chromosome_I	3042097	3042291	195	+	8.53368	487.994	529.83	546.46	299.805	256.706	330.692	504.871	475.392	429.997	322.881	299.33	314.94	369.701	295.243	291.157	424.73	416.761	402.189	294.493	318.579	348.097	103.119	112.291	116.967	82.8263	68.0684	83.0084	123.276	105.939
pgaptmp_000367	pgaptmp_000367	pgaptmp_000367	protein_coding	protein_coding	pgaptmp_000367	0.4158	606				TRUE	0.934138	0.000455112	0.00390812	Chromosome_I	396628	397233	606	+	10.6341	3472.24	2747.72	3190.54	1550.27	1730.72	1097.63	2053.64	2401.59	2429.38	1360.13	1264.44	774.383	1278.49	1529.49	1156.72	1141.04	1339.49	900.956	1237.76	1684.01	1780.36	236.099	187.388	219.752	137.816	147.672	88.6579	161.356	172.212
pgaptmp_002635	pgaptmp_002635	pgaptmp_002635	protein_coding	protein_coding	pgaptmp_002635	0.4663	1188				TRUE	0.752261	0.000455452	0.00390812	Chromosome_I	2851268	2852455	1188	+	9.18153	949.777	1035.9	1155.82	657.264	664.978	578.093	657.817	679.131	677.017	423.781	500.698	474.263	441.874	449.524	407.093	399.448	459.37	407.481	583.398	651.175	528.377	32.943	36.0364	40.6081	29.8049	28.9424	23.8185	26.3646	24.8413
pgaptmp_000851	pgaptmp_000851	pgaptmp_000851	protein_coding	protein_coding	pgaptmp_000851	0.4656	393				TRUE	0.755945	0.000456429	0.00391013	Chromosome_I	898336	898728	393	+	7.90908	511.122	490.225	495.816	383.725	357.75	265.543	373.456	435.092	479.26	167.494	107.033	159.323	163.493	214.218	184.444	70.7883	98.5314	92.6092	231.906	286.721	320.682	53.5908	51.5519	52.6586	52.6007	47.0686	33.0731	45.2459	48.1089
pgaptmp_003364	pgaptmp_003364	pgaptmp_003364	protein_coding	protein_coding	pgaptmp_003364	0.509	387				TRUE	-0.724683	0.000462437	0.00394921	Chromosome_II	100278	100664	387	+	7.84788	102.533	99.4532	117.624	183.855	218.473	157.512	187.842	181.35	173.829	230.052	350.125	242.689	500.791	245.296	363.617	527.541	653.769	537.134	181.613	175.855	158.679	10.9172	10.6206	12.686	25.5934	29.1898	19.9221	23.1107	20.3631
pgaptmp_003980	pgaptmp_003980	pgaptmp_003980	protein_coding	protein_coding	pgaptmp_003980	0.4444	693	GO:0000160,GO:0006355	GO:0000156,GO:0003677		TRUE	-0.717863	0.000462493	0.00394921	Chromosome_II	748022	748714	693	+	8.01627	205.836	222.67	178.069	279.946	297.67	316.673	345.243	305.236	317.396	223.998	266.676	229.721	268.07	224.207	201.57	225.848	213.041	227.554	312.375	303.924	350.59	12.239	13.2791	10.725	21.7623	22.2099	22.3671	23.7205	19.1399
pgaptmp_003703	pgaptmp_003703	pgaptmp_003703	protein_coding	protein_coding	pgaptmp_003703	0.4365	843				TRUE	-1.06908	0.000464264	0.00395523	Chromosome_II	463307	464149	843	+	10.4453	486.452	668.009	692.673	1188.97	1110.8	2088.06	1452.99	1163.48	1131.65	1846.47	2516.19	2478.77	1745.4	1205.39	1270.03	2818.05	2447.31	2337.72	1490.35	1205.5	997.769	23.7778	32.7489	34.2958	75.9814	68.1322	121.241	82.0668	59.9747
pgaptmp_002117	pgaptmp_002117	pgaptmp_002117	protein_coding	protein_coding	pgaptmp_002117	0.4744	1638			GO:0098561	TRUE	0.908207	0.000465864	0.00395523	Chromosome_I	2300705	2302342	1638	-	7.73271	400.88	352.927	339.802	237.666	199.357	133.596	192.296	249.263	218.869	217.944	288.445	216.753	157.602	183.139	175.221	166.858	187.742	170.666	158.143	160.564	230.957	10.0846	8.90456	8.6587	7.81658	6.29305	3.99221	5.58972	6.61275
pgaptmp_001910	pgaptmp_001910	pgaptmp_001910	protein_coding	protein_coding	pgaptmp_001910	0.4777	2355				TRUE	0.648618	0.000465975	0.00395523	Chromosome_I	2052009	2054363	2355	-	10.101	1451.65	1395.87	1376.36	898.774	967.428	939.298	1101.06	1076.91	1064.79	1115.96	1297.1	1526.53	1279.96	1128.81	1206.79	972.496	1027.92	1022.67	772.834	846.145	947.922	25.3997	24.4959	24.3939	20.56	21.2408	19.5229	22.2615	19.8712
pgaptmp_001998	pgaptmp_001998	pgaptmp_001998	protein_coding	protein_coding	pgaptmp_001998	0.4671	1032	GO:0006810	GO:0005215	GO:0016020	TRUE	1.08457	0.000466206	0.00395523	Chromosome_I	2165015	2166046	1032	-	9.54899	1135.57	879.237	832.351	404.865	494.979	266.368	468.491	620.92	624.235	1178.51	845.381	1007.81	1845.56	2245.4	1965.64	667.432	806.893	862.589	325.786	438.364	513.423	45.3411	35.2101	33.6641	21.1346	24.8	12.6338	21.6149	26.1453
pgaptmp_005233	pgaptmp_005233	pgaptmp_005233	protein_coding	protein_coding	pgaptmp_005233	0.4257	303	GO:0009401	GO:0008982		TRUE	-0.62144	0.00046706	0.0039561	Chromosome_II	2210716	2211018	303	+	7.79796	708.478	822.909	860.94	1135.16	988.592	995.375	1297.82	1078.4	1227.36	18.162	16.3271	16.6733	29.4583	31.0782	26.3491	57.3048	54.5917	23.8138	1164	1143.7	1207.96	96.3478	112.241	118.596	201.826	168.701	160.797	203.94	154.659
pgaptmp_003642	pgaptmp_003642	pgaptmp_003642	protein_coding	protein_coding		0.5	1000				TRUE	-1.44756	0.000468989	0.00396581	pgaptmp_003642	1	1000	1000	+	10.4139	679.183	814.988	918.935	1616.26	1568.91	1920.65	1315.63	942.574	915.591	1596.24	1777.84	1567.29	885.221	1103.28	1247.63	2312.42	1700.33	1402.37	2963.93	1837.56	1463.01	27.9863	33.6816	38.3553	87.0711	81.1227	94.0117	62.6423	40.9593
pgaptmp_001653	pgaptmp_001653	pgaptmp_001653	protein_coding	protein_coding	pgaptmp_001653	0.4822	10720	GO:0007154		GO:0016020	TRUE	0.588611	0.000469715	0.00396581	Chromosome_I	1729256	1739974	10719	+	10.0072	1203.41	1276.17	1203.19	907.102	904.616	1120.72	1112.94	1070.19	974.003	1279.41	1061.26	1193.07	1175.39	1018.92	1014.44	1063.51	961.347	967.105	788.481	750.571	788.412	4.6257	4.91989	4.68469	4.55854	4.36329	5.11725	4.94323	4.33814
pgaptmp_000194	pgaptmp_000194	pgaptmp_000194	protein_coding	protein_coding	pgaptmp_000194	0.4769	627				TRUE	-0.881953	0.00047088	0.00396928	Chromosome_I	211108	211734	627	-	8.22739	249.779	259.634	309.579	541.955	432.85	475.834	252.435	282.847	289.245	137.224	114.29	140.797	284.272	369.609	384.697	254.501	266.301	306.933	421.902	579.813	451.114	16.4152	17.1134	20.6084	46.565	35.6956	37.1467	19.1697	19.6029
pgaptmp_005001	pgaptmp_005001	pgaptmp_005001	protein_coding	protein_coding	pgaptmp_005001	0.3961	669	GO:0006355			TRUE	-0.937791	0.000473791	0.00398743	Chromosome_II	1954239	1954907	669	-	8.61602	366.188	396.933	490.915	984.615	862.97	770.24	634.801	507.483	605.937	294.629	234.022	201.932	181.168	247.516	229.237	205.623	177.09	132.299	908.067	735.917	654.656	22.5547	24.5207	30.6282	79.2875	66.6981	56.3551	45.1798	32.9634
pgaptmp_003879	pgaptmp_003879	pgaptmp_003879	protein_coding	protein_coding	pgaptmp_003879	0.4528	996	GO:0006810	GO:0005215	GO:0016020	TRUE	-0.672198	0.000478718	0.00402245	Chromosome_II	645959	646954	996	+	7.29797	139.537	138.178	161.733	244.712	228.714	239.154	228.677	207.471	205.498	151.35	110.661	118.566	73.6457	123.203	113.301	139.891	77.2273	113.777	239.73	218.545	220.988	5.77282	5.73353	6.77765	13.2361	11.8735	11.7531	10.9319	9.0518
pgaptmp_004673	pgaptmp_004673	pgaptmp_004673	protein_coding	protein_coding	pgaptmp_004673	0.4863	732				TRUE	-0.763482	0.000483376	0.00405512	Chromosome_II	1586873	1587604	732	-	7.1317	95.5944	85.3713	92.3019	142.215	142.008	156.687	113.596	150.752	120.343	238.124	152.386	244.542	164.966	149.841	169.952	119.666	103.857	130.976	169.878	147.821	138.741	5.38121	4.81995	5.26309	10.4664	10.031	10.4774	7.38898	8.94932
pgaptmp_000649	pgaptmp_000649	pgaptmp_000649	protein_coding	protein_coding	pgaptmp_000649	0.4776	984		GO:0005524,GO:0016887,GO:0042626,GO:0140359		TRUE	1.04158	0.000487174	0.00407592	Chromosome_I	666006	666989	984	-	6.56646	143.392	125.857	123.341	74.9512	84.6584	75.8695	85.3826	105.228	85.8587	70.6301	108.847	83.3666	144.346	128.753	168.634	85.9572	94.5369	111.131	56.4398	70.0873	43.2006	6.00464	5.28595	5.23185	4.10344	4.44856	3.77403	4.13149	4.64701
pgaptmp_004040	pgaptmp_004040	pgaptmp_004040	protein_coding	protein_coding	pgaptmp_004040	0.4744	624		GO:0015288,GO:0042834		TRUE	-0.782734	0.00048765	0.00407592	Chromosome_II	810284	810907	624	+	10.5938	908.918	1038.54	1163.98	1901.33	1869.31	2334.64	2077.4	1905.3	1847.37	2032.13	1991.91	2093.43	914.679	970.084	1039.47	1666.9	1565.85	1395.75	1829.54	1773.21	1494.58	60.0203	68.7827	77.858	164.148	154.896	183.133	158.514	132.683
pgaptmp_001248	pgaptmp_001248	pgaptmp_001248	protein_coding	protein_coding	pgaptmp_001248	0.4848	231				TRUE	0.877165	0.00048818	0.00407592	Chromosome_I	1334311	1334541	231	-	9.2326	2517.83	2754.77	3305.71	1764.88	1544.33	1513.27	2075.17	2162.77	2154.91	143.278	177.784	138.944	106.05	87.685	134.38	129.779	129.156	100.547	1196.41	1666.17	1575.16	449.131	492.85	597.302	411.592	345.679	320.654	427.734	406.852
pgaptmp_004087	pgaptmp_004087	pgaptmp_004087	protein_coding	protein_coding	pgaptmp_004087	0.4167	264				TRUE	-0.949752	0.000489669	0.00408187	Chromosome_II	893526	893789	264	-	8.00793	262.885	352.927	312.846	591.282	419.879	606.131	659.302	417.18	497.558	119.062	83.4496	109.303	89.8477	122.093	101.444	187.083	142.471	107.162	701.307	498.257	523.392	41.0317	55.2487	49.4616	120.658	82.2363	112.382	118.909	68.6685
pgaptmp_003425	pgaptmp_003425	pgaptmp_003425	protein_coding	protein_coding	pgaptmp_003425	0.4541	447		GO:0008080		TRUE	-1.06859	0.000493873	0.0041104	Chromosome_II	173505	173951	447	-	8.87865	306.056	407.494	405.148	768.73	646.545	1069.6	866.448	708.983	714.316	322.881	302.958	326.056	306.366	273.044	264.808	332.031	334.208	346.623	870.067	804.093	569.916	28.2132	37.6752	37.8309	92.6469	74.7885	117.124	92.2927	68.9232
pgaptmp_002093	pgaptmp_002093	pgaptmp_002093	protein_coding	protein_coding	pgaptmp_002093	0.4589	717		GO:0003677,GO:0003700		TRUE	0.783939	0.000496796	0.00412819	Chromosome_I	2269695	2270411	717	-	7.08358	336.893	285.158	322.648	242.791	216.425	173.18	220.51	296.28	294.171	38.3421	76.1931	59.2829	66.2811	61.0465	48.7458	89.3281	63.9123	93.9322	144.173	178.404	193.572	19.3612	16.4364	18.7824	18.2422	15.6075	11.8226	14.6434	17.9565
pgaptmp_005120	pgaptmp_005120	pgaptmp_005120	protein_coding	protein_coding	pgaptmp_005120	0.4386	171				TRUE	-0.907036	0.000498318	0.00413121	Chromosome_II	2089922	2090092	171	-	6.09811	36.2334	46.6462	35.9406	75.5918	60.7629	99.7849	83.1552	32.8371	50.6707	161.44	59.866	92.6295	76.5915	55.4968	51.3807	96.0698	74.5643	107.162	89.4096	71.3616	68.9549	8.73114	11.2736	8.77263	23.8146	18.3733	28.5628	23.154	8.34461
pgaptmp_003912	pgaptmp_003912	pgaptmp_003912	protein_coding	protein_coding	pgaptmp_003912	0.4671	486		GO:0047617		TRUE	-0.726741	0.000498729	0.00413121	Chromosome_II	683125	683610	486	-	8.71426	412.444	520.149	512.97	748.231	582.368	837.039	1478.97	1095.57	1123.9	143.278	166.899	194.522	154.656	156.501	177.856	256.186	234.345	296.35	671.69	774.783	847.397	34.9693	44.2317	44.0551	82.9399	61.9591	84.3028	144.896	97.9579
pgaptmp_003930	pgaptmp_003930	pgaptmp_003930	protein_coding	protein_coding	pgaptmp_003930	0.4369	483				TRUE	-1.08616	0.000501485	0.00414201	Chromosome_II	701369	701851	483	+	10.3385	783.258	1101.03	1128.86	1944.89	1950.56	2431.12	1914.8	1625.44	1588.39	1089.72	1182.81	1241.24	755.605	768.076	702.203	1100.59	971.999	902.279	2515.2	1885.35	1683.99	66.8214	94.2089	97.5515	216.926	208.812	246.373	188.759	146.238
pgaptmp_000943	pgaptmp_000943	pgaptmp_000943	protein_coding	protein_coding	pgaptmp_000943	0.4501	531				TRUE	-0.82417	0.000501609	0.00414201	Chromosome_I	992031	992561	531	+	9.60969	587.443	703.213	622.425	825.744	771.484	921.155	514.523	410.464	458.147	845.543	908.875	837.371	846.925	846.881	970.963	975.867	853.495	816.284	1279.12	960.833	997.769	45.5858	54.7311	48.9253	83.7752	75.1236	84.9124	46.1363	33.5906
pgaptmp_002128	pgaptmp_002128	nikA	protein_coding	protein_coding	pgaptmp_002128	0.4707	1587	GO:0015675	GO:0015413,GO:0016151	GO:0009897,GO:0030288,GO:0055052	TRUE	-0.821306	0.00050335	0.00414806	Chromosome_I	2312990	2314576	1587	-	8.29237	373.127	434.778	504.801	965.397	826.785	541.807	729.093	715.7	633.384	94.8462	137.873	125.976	88.3748	98.7843	106.714	158.431	142.471	148.175	824.804	733.368	659.64	9.68808	11.3222	13.2765	32.7713	26.9377	16.7109	21.8745	19.5971
pgaptmp_003887	pgaptmp_003887	pgaptmp_003887	protein_coding	protein_coding	pgaptmp_003887	0.5005	1872	GO:0009401	GO:0022877	GO:0016020	TRUE	0.624507	0.000503918	0.00414806	Chromosome_II	654994	656865	1872	+	9.81579	865.746	851.073	831.534	1125.55	919.637	1255.15	1617.81	1372.44	1357.55	714.373	709.322	629.881	729.092	792.495	739.092	1304.53	1033.25	1748.99	491.194	497.62	583.209	19.0565	18.789	18.5402	32.3909	25.4012	32.8187	41.1487	31.8585
pgaptmp_003782	pgaptmp_003782	pgaptmp_003782	protein_coding	protein_coding	pgaptmp_003782	0.4308	390	GO:0022900	GO:0005506,GO:0009055,GO:0020037	GO:0042597	TRUE	-0.975311	0.0005085	0.00417923	Chromosome_II	537339	537728	390	+	10.2716	487.994	637.205	601.188	959.632	959.235	1619.65	1114.43	837.346	841.696	1991.77	2062.66	2065.64	1243.14	1051.11	1031.57	3825.94	2424.67	2995.25	1286.38	1083.17	868.167	51.5594	67.5237	64.3408	132.557	127.176	203.277	136.057	93.2992
pgaptmp_003467	pgaptmp_003467	pgaptmp_003467	protein_coding	protein_coding	pgaptmp_003467	0.412	216				TRUE	-0.997072	0.000513389	0.00420558	Chromosome_II	218027	218242	216	-	8.58638	258.259	293.959	315.297	381.162	391.887	659.735	443.247	323.893	349.768	452.033	484.37	455.737	299.001	296.353	242.412	350.571	382.142	326.778	699.63	508.452	455.268	49.2675	56.2438	60.9266	95.0649	93.8103	149.503	97.7068	65.1607
pgaptmp_001908	pgaptmp_001908	pgaptmp_001908	protein_coding	protein_coding	pgaptmp_001908	0.4687	1677				TRUE	0.662903	0.000513772	0.00420558	Chromosome_I	2049261	2050937	1677	-	6.579	127.202	117.056	132.327	103.779	87.3894	103.084	106.914	97.765	87.2662	72.6481	103.405	83.3666	107.523	109.884	104.079	85.9572	87.8794	82.0253	74.3218	71.3616	73.1088	3.1255	2.8847	3.29348	3.3338	2.69445	3.00877	3.03552	2.53331
pgaptmp_005002	pgaptmp_005002	pgaptmp_005002	protein_coding	protein_coding	pgaptmp_005002	0.4129	201				TRUE	-0.848906	0.000514105	0.00420558	Chromosome_II	1955085	1955285	201	-	10.139	668.39	998.053	830.717	1322.22	989.275	1679.85	1597.77	1190.35	1404.7	1828.31	1184.62	1522.83	966.231	678.171	569.14	1194.97	858.821	1021.35	1550.14	1354.6	1385.74	137.023	205.21	172.504	354.381	254.487	409.079	378.487	257.344
pgaptmp_003139	pgaptmp_003139	pgaptmp_003139	protein_coding	protein_coding	pgaptmp_003139	0.4595	618		GO:0009055,GO:0020037		TRUE	-0.940385	0.000514939	0.00420587	Chromosome_I	3400134	3400751	618	-	10.8487	956.715	1109.83	1255.47	2030.73	1904.13	2991.07	1450.76	1135.12	1245.65	2579.01	2472.65	2336.12	1923.63	1982.35	1935.34	2329.27	2162.37	2693.61	2409.03	1989.21	1667.38	63.79	74.2179	84.7927	177.022	159.313	236.903	111.774	79.8161
pgaptmp_005017	pgaptmp_005017	pgaptmp_005017	protein_coding	protein_coding	pgaptmp_005017	0.4449	1344		GO:0004386,GO:0005524,GO:0016887		TRUE	-0.85775	0.000518937	0.00423195	Chromosome_II	1973509	1974852	1344	-	12.9821	4862.21	5736.6	5480.93	7739.19	7848.66	9310.51	7052.6	6918.18	6283.87	9210.17	10233.5	11628.7	9657.9	8361.15	8950.78	9354.17	8990.33	8583.55	10756.5	8954.61	7988.79	149.071	176.399	170.214	310.213	301.953	339.084	249.852	223.682
pgaptmp_003789	pgaptmp_003789	pgaptmp_003789	protein_coding	protein_coding	pgaptmp_003789	0.4813	696				TRUE	-0.897895	0.000521669	0.00424764	Chromosome_II	542757	543452	696	+	5.71796	33.9206	32.5643	34.3069	48.0456	47.1083	65.9735	44.5474	55.226	40.8181	60.5401	38.0966	50.02	95.7394	62.1564	77.7298	45.5068	34.6192	70.1184	75.4394	50.9726	71.4472	2.00823	1.93363	2.05737	3.71885	3.49971	4.63973	3.04752	3.44804
pgaptmp_003426	pgaptmp_003426	pgaptmp_003426	protein_coding	protein_coding	pgaptmp_003426	0.3822	450				TRUE	-1.00818	0.00052544	0.00427174	Chromosome_II	173964	174413	450	-	8.9564	434.8	502.547	521.955	959.632	903.934	983.005	1141.16	900.781	975.411	314.809	275.746	263.068	182.641	258.615	243.729	306.749	260.975	248.722	1126	962.745	714.472	39.814	46.1536	48.4129	114.883	103.865	106.924	120.744	86.985
pgaptmp_005034	pgaptmp_005034	pgaptmp_005034	protein_coding	protein_coding	pgaptmp_005034	0.4409	744	GO:0006355	GO:0003700		TRUE	-0.815748	0.000528433	0.00428743	Chromosome_II	1993211	1993954	744	+	9.86153	706.936	896.839	966.311	1402.93	1366.82	1550.38	1839.07	1573.94	1542.64	671.995	769.188	703.985	586.22	658.192	573.092	519.114	487.331	440.555	1608.81	1395.37	1305.99	39.153	49.8176	54.2107	101.585	94.9913	101.999	117.695	91.9292
pgaptmp_003558	pgaptmp_003558	pgaptmp_003558	protein_coding	protein_coding	pgaptmp_003558	0.4639	429	GO:0006355	GO:0003700		TRUE	-0.729528	0.000529	0.00428743	Chromosome_II	313641	314069	429	-	8.99724	364.646	493.746	432.104	698.263	616.505	994.55	943.663	720.177	819.88	393.511	390.036	346.435	474.278	483.932	462.426	249.444	347.523	250.045	723.1	641.617	684.564	35.0246	47.565	42.0408	87.6852	74.3058	113.476	104.735	72.9491
pgaptmp_003318	pgaptmp_003318	pgaptmp_003318	protein_coding	protein_coding	pgaptmp_003318	0.4492	354				TRUE	-0.785194	0.000532207	0.00430678	Chromosome_II	54459	54812	354	+	7.57576	123.348	140.819	115.173	295.321	230.08	323.27	213.085	178.365	225.203	226.016	201.367	244.542	153.183	134.302	144.92	207.309	185.079	153.467	228.553	221.094	186.926	14.3577	16.4399	13.5797	44.9422	33.6062	44.6987	28.6604	21.895
pgaptmp_005186	pgaptmp_005186	pgaptmp_005186	protein_coding	protein_coding	pgaptmp_005186	0.4544	933	GO:0009263			TRUE	-1.36313	0.000540688	0.00436869	Chromosome_II	2154896	2155828	933	-	6.19311	49.3391	44.0058	50.6435	89.0446	92.8512	53.6035	78.7005	107.467	80.2286	36.3241	94.3343	72.251	67.754	55.4968	43.476	62.3611	75.8958	87.3173	77.1158	140.812	172.803	2.17905	1.94926	2.2656	5.1415	5.14576	2.81219	4.01632	5.0053
pgaptmp_003422	pgaptmp_003422	pgaptmp_003422	protein_coding	protein_coding	pgaptmp_003422	0.4431	510	GO:0006355	GO:0003677		TRUE	-0.895947	0.000543347	0.00438345	Chromosome_II	171698	172207	510	+	8.8023	268.281	338.845	371.658	499.675	553.011	795.805	756.564	590.322	589.047	393.511	622.244	427.949	378.539	257.505	256.904	421.359	379.479	265.921	661.631	588.733	494.315	21.6759	27.4582	30.4169	52.7815	56.067	76.3782	70.6331	50.2986
pgaptmp_004943	pgaptmp_004943	pgaptmp_004943	protein_coding	protein_coding	pgaptmp_004943	0.4539	705				TRUE	-0.848474	0.000546489	0.00439292	Chromosome_II	1873417	1874121	705	-	7.54492	116.409	123.216	153.564	212.041	230.08	235.855	171.508	153.737	150.605	199.782	181.412	192.669	201.789	221.987	180.491	190.454	206.383	166.697	261.523	226.191	201.049	6.80388	7.22305	9.09163	16.203	16.8746	16.3753	11.5832	9.47606
pgaptmp_002475	pgaptmp_002475	cysK	protein_coding	protein_coding	pgaptmp_002475	0.4716	969	GO:0006535	GO:0004124		TRUE	0.669599	0.000546995	0.00439292	Chromosome_I	2692504	2693472	969	+	12.0177	4738.09	4677.82	4718.83	3457.36	3260.03	2252.99	3523.7	4249.42	4217.63	7149.79	5933.99	6313.63	7064.09	6711.79	6662.36	3116.37	3858.7	2454.14	2464.35	2955.77	3054.78	201.483	199.509	203.26	192.214	173.957	113.807	173.144	190.565
pgaptmp_000935	pgaptmp_000935	fadJ	protein_coding	protein_coding	pgaptmp_000935	0.4662	2115	GO:0006635	GO:0003857,GO:0008692,GO:0016491,GO:0051287		TRUE	0.730309	0.000547027	0.00439292	Chromosome_I	981881	983995	2115	+	8.50045	340.748	323.003	302.227	187.058	223.935	202.044	198.979	258.965	225.203	659.887	888.92	800.319	745.294	645.983	602.076	588.217	528.608	615.19	180.496	157.378	211.018	6.63867	6.31157	5.96437	4.76463	5.47465	4.67593	4.47949	5.3207
pgaptmp_001544	pgaptmp_001544	pgaptmp_001544	protein_coding	protein_coding	pgaptmp_001544	0.4185	681	GO:0000160			TRUE	0.763925	0.000548181	0.00439547	Chromosome_I	1600882	1601562	681	-	7.17985	514.205	509.588	490.099	366.428	335.903	244.102	296.24	315.684	359.621	46.4141	30.8401	59.2829	39.7687	44.3975	38.2062	57.3048	46.6027	44.9816	229.112	309.658	304.066	31.1134	30.9253	30.0384	28.9872	25.5041	17.5451	20.7124	20.1439
pgaptmp_003598	pgaptmp_003598	pgaptmp_003598	protein_coding	protein_coding	pgaptmp_003598	0.4518	768				TRUE	-0.953848	0.000552709	0.00442419	Chromosome_II	350111	350878	768	+	9.20975	318.391	269.316	244.232	471.488	561.204	404.088	318.514	445.54	425.774	1047.34	1090.29	1224.56	767.388	814.693	811.552	1120.81	994.635	1095.43	492.312	426.895	648.01	17.0828	14.4925	13.2734	33.073	37.7836	25.7541	19.747	25.2094
pgaptmp_002372	pgaptmp_002372	pgaptmp_002372	protein_coding	protein_coding	pgaptmp_002372	0.4236	720				TRUE	-0.768498	0.00055361	0.00442419	Chromosome_I	2586261	2586980	720	-	9.98723	736.231	903	1063.51	397.818	384.377	436.25	432.853	385.836	395.513	678.049	685.738	694.722	1861.76	1814.75	2204.1	3396.15	3288.82	5080.28	1488.67	1483.3	1416.48	42.1347	51.8319	61.6526	29.7657	27.6038	29.6576	28.6247	23.2867
pgaptmp_003738	pgaptmp_003738	pgaptmp_003738	protein_coding	protein_coding	pgaptmp_003738	0.4493	483				TRUE	-0.857312	0.000554745	0.00442419	Chromosome_II	496722	497204	483	+	5.49931	30.8369	29.0439	40.0247	55.0923	66.9075	46.1814	35.638	54.4797	47.1519	52.4681	68.9366	24.0837	41.2416	37.7378	36.8887	32.0233	37.2822	42.3356	54.7634	63.7157	72.278	2.63076	2.48513	3.45877	6.14481	7.16261	4.68008	3.51316	4.90146
pgaptmp_001031	pgaptmp_001031	pgaptmp_001031	protein_coding	protein_coding		0.5	1000				TRUE	-1.49144	0.000555126	0.00442419	pgaptmp_001031	1	1000	1000	+	7.90878	164.977	209.468	178.886	479.175	279.236	460.99	161.856	142.543	153.42	312.791	148.758	276.036	203.262	139.852	152.825	301.693	206.383	177.281	633.132	578.539	295.758	6.79803	8.65683	7.4665	25.8142	14.4383	22.5644	7.70656	6.19417
pgaptmp_004286	pgaptmp_004286	pgaptmp_004286	protein_coding	protein_coding	pgaptmp_004286	0.4655	537				TRUE	-1.12382	0.000556663	0.00442494	Chromosome_II	1138859	1139395	537	+	10.3382	482.598	717.295	748.217	1179.36	1295.14	2429.47	1167.14	874.661	789.618	1779.88	2169.69	2350.94	1524.47	1141.01	1233.14	1894.43	1962.64	1685.49	1676.99	1227.8	1140.66	37.0313	55.2033	58.156	118.314	124.705	221.447	103.486	70.7788
pgaptmp_000217	pgaptmp_000217	frdC	protein_coding	protein_coding	pgaptmp_000217	0.4635	384			GO:0016020	TRUE	1.25385	0.000556903	0.00442494	Chromosome_I	235155	235538	384	-	10.1229	3540.85	2552.34	1932.62	1488.13	1656.98	1122.37	1557.68	2874.74	2261.88	639.707	580.519	498.347	674.594	850.211	790.472	615.184	548.58	574.177	905.272	1118.85	1194.66	379.957	274.694	210.066	208.773	223.116	143.067	193.143	325.315
pgaptmp_002893	pgaptmp_002893	pgaptmp_002893	protein_coding	protein_coding	pgaptmp_002893	0.4649	1953				TRUE	0.641581	0.000558509	0.00443101	Chromosome_I	3145206	3147158	1953	+	10.3613	2620.37	2519.77	2284.68	1680.96	1614.66	1762.32	1858.37	1674.69	1636.24	538.807	863.522	535.399	698.161	648.203	652.14	1405.65	1118.46	2119.43	1440.05	1540.01	1556.05	55.2864	53.3213	48.8274	46.368	42.7486	44.1687	45.3067	37.2623
pgaptmp_004740	pgaptmp_004740	pgaptmp_004740	protein_coding	protein_coding	pgaptmp_004740	0.4305	1050		GO:0016787		TRUE	-0.746213	0.000559469	0.00443194	Chromosome_II	1656444	1657493	1050	-	7.19106	114.867	152.26	152.747	259.446	205.502	214.414	228.677	182.097	202.683	129.152	134.245	124.124	73.6457	92.1247	111.984	84.2718	83.8849	70.1184	224.642	240.845	217.665	4.50781	5.99292	6.07191	13.3114	10.1197	9.99531	10.3697	7.53616
pgaptmp_000850	pgaptmp_000850	pgaptmp_000850	protein_coding	protein_coding	pgaptmp_000850	0.426	507		GO:0016779		TRUE	0.641813	0.000561977	0.0044403	Chromosome_I	897788	898294	507	+	8.73246	639.095	750.74	753.118	475.332	509.316	479.957	658.56	656.742	698.129	298.665	284.817	274.183	319.622	322.991	357.03	259.557	264.97	250.045	436.99	449.833	411.237	51.9416	61.196	62.0006	50.5072	51.9426	46.3369	61.8472	56.2891
pgaptmp_003384	pgaptmp_003384	pgaptmp_003384	protein_coding	protein_coding	pgaptmp_003384	0.4646	198				TRUE	-0.943831	0.000562213	0.0044403	Chromosome_II	120754	120951	198	-	8.14408	296.034	422.456	339.802	805.886	641.766	1114.13	1432.94	681.37	885.329	32.2881	67.1225	27.7889	64.8082	63.2664	69.8251	293.266	197.063	459.077	516.899	683.033	761.827	61.6077	88.1775	71.631	219.267	167.593	275.424	344.585	149.539
pgaptmp_002813	pgaptmp_002813	gltB	protein_coding	protein_coding	pgaptmp_002813	0.4908	4464	GO:0006537,GO:0008152	GO:0003824,GO:0015930,GO:0016491		TRUE	0.752675	0.000564169	0.00444907	Chromosome_I	3052098	3056561	4464	+	11.5977	3287.99	3359.41	3636.53	2123.62	2085.74	2112.8	2037.3	2035.9	2008.53	3396.3	3194.67	3084.56	6253.99	7073.62	6087.95	4407.41	4709.54	4959.89	2077.1	2056.11	1658.24	30.3504	31.1014	34.002	25.6281	24.159	23.1669	21.7302	19.8185
pgaptmp_003351	pgaptmp_003351	pgaptmp_003351	protein_coding	protein_coding	pgaptmp_003351	0.4251	1101				TRUE	-0.937751	0.000565917	0.00445617	Chromosome_II	85902	87002	1101	-	5.36506	29.2951	42.2456	29.4059	62.139	70.3211	56.9021	46.7748	32.8371	52.0782	24.216	39.9107	16.6733	26.5124	36.6279	46.1109	26.967	51.9287	21.1678	72.6453	70.7245	58.9855	1.09639	1.58575	1.11478	3.04047	3.3025	2.52973	2.02282	1.29603
pgaptmp_001253	pgaptmp_001253	pgaptmp_001253	protein_coding	protein_coding	pgaptmp_001253	0.4699	1626			GO:0098561	TRUE	0.637538	0.000576166	0.00452649	Chromosome_I	1338495	1340120	1626	-	7.80278	337.664	381.971	363.49	279.946	263.534	237.505	297.725	241.054	262.502	155.386	150.572	185.259	151.71	217.548	188.396	138.206	190.405	169.343	225.2	225.554	203.541	8.55702	9.70848	9.33066	9.27508	8.38029	7.14964	8.71822	6.44216
pgaptmp_001274	pgaptmp_001274	pgaptmp_001274	protein_coding	protein_coding	pgaptmp_001274	0.4174	345				TRUE	0.765498	0.000576569	0.00452649	Chromosome_I	1362150	1362494	345	+	5.28914	84.0306	71.2895	79.2326	69.8263	33.4537	46.1814	49.7446	79.8539	57.0045	34.3061	5.44236	9.26295	14.7291	29.9683	46.1109	33.7087	46.6027	30.4287	44.7048	39.5038	38.2159	10.0364	8.5398	9.58574	10.9035	5.01383	6.55211	6.86531	10.0581
pgaptmp_001646	pgaptmp_001646	pgaptmp_001646	protein_coding	protein_coding	pgaptmp_001646	0.452	615		GO:0016407		TRUE	1.12364	0.000583291	0.00457244	Chromosome_I	1719397	1720011	615	+	7.25789	649.117	544.792	613.44	418.317	363.895	244.102	510.811	538.827	496.15	66.5941	19.9553	51.8725	39.7687	36.6279	44.7934	37.0796	43.9397	44.9816	174.908	296.915	311.543	43.4917	36.6098	41.633	36.6433	30.5946	19.428	39.5474	38.0725
pgaptmp_004354	pgaptmp_004354	yciH	protein_coding	protein_coding	pgaptmp_004354	0.4295	312				TRUE	-0.751586	0.000588857	0.00460921	Chromosome_II	1219689	1220000	312	+	9.96718	524.227	540.392	594.653	1188.33	1015.22	1004.45	858.281	876.9	911.369	1073.58	856.265	1081.91	1548.03	1304.18	1254.22	1720.83	1592.48	1489.69	848.274	756.306	1080.85	69.2346	71.5807	79.5518	205.185	168.248	157.581	130.981	122.133
pgaptmp_000433	pgaptmp_000433	pgaptmp_000433	protein_coding	protein_coding	pgaptmp_000433	0.4757	801				TRUE	-0.60012	0.000593414	0.00463302	Chromosome_I	466665	467465	801	+	10.7742	1066.96	1109.83	1204.83	1007.04	1301.96	1692.22	1154.52	1108.25	1085.2	2492.23	3167.46	2949.32	2389.07	1926.85	2163.26	3129.85	3071.78	3003.19	1689.84	1632.4	1567.68	54.8874	57.2617	62.7816	67.7294	84.0448	103.409	68.6281	60.1234
pgaptmp_004987	pgaptmp_004987	pgaptmp_004987	protein_coding	protein_coding	pgaptmp_004987	0.4612	11090				TRUE	-0.566351	0.000593661	0.00463302	Chromosome_II	1929324	1940414	11091	-	9.45323	587.443	652.167	644.48	928.882	871.163	858.48	987.468	1008.99	1003.56	530.735	529.723	505.757	606.84	685.941	595.489	493.833	567.222	468.338	854.98	886.286	927.983	2.18269	2.43035	2.4256	4.51225	4.06174	3.78906	4.23959	3.95362
pgaptmp_004170	pgaptmp_004170	pgaptmp_004170	protein_coding	protein_coding	pgaptmp_004170	0.3693	501				TRUE	-1.02677	0.00059545	0.00463686	Chromosome_II	1010258	1010758	501	+	8.46827	228.193	293.079	262.203	585.516	551.645	694.371	484.082	388.821	446.184	359.205	290.259	281.594	226.829	221.987	225.285	343.829	288.937	231.523	628.661	511.637	393.79	18.7682	24.1762	21.8444	62.9601	56.9333	67.8401	46.006	33.7248
pgaptmp_003821	pgaptmp_003821	pgaptmp_003821	protein_coding	protein_coding	pgaptmp_003821	0.4442	2418				TRUE	-0.821498	0.000596152	0.00463686	Chromosome_II	583882	586299	2418	+	7.09001	90.9689	87.1316	102.104	181.933	185.702	167.408	141.809	130.602	140.048	127.134	112.476	105.598	139.927	180.92	156.777	153.375	106.52	116.423	173.79	177.13	135.417	1.55023	1.48923	1.76249	4.0534	3.97105	3.38885	2.79242	2.3471
pgaptmp_001254	pgaptmp_001254	queD	protein_coding	protein_coding	pgaptmp_001254	0.416	363	GO:0008616	GO:0003824		TRUE	-1.17444	0.000596797	0.00463686	Chromosome_I	1340483	1340845	363	+	11.6602	1608.92	1930.1	2252	2510.54	2399.11	4160.45	1602.97	1200.79	1252.69	5081.33	4689.5	4712.99	3268.4	3638.37	4217.17	8376.61	6994.4	5575.08	5470.75	3675.76	3264.97	182.635	219.742	258.942	372.585	341.734	561.005	210.257	143.747
pgaptmp_004526	pgaptmp_004526	pgaptmp_004526	protein_coding	protein_coding	pgaptmp_004526	0.4492	1320				TRUE	-0.629071	0.000600525	0.00465894	Chromosome_II	1405540	1406859	1320	-	6.91678	118.722	112.655	122.525	221.01	204.819	143.492	144.779	134.334	163.272	117.044	78.0072	88.9244	67.754	114.323	98.809	58.9902	70.5698	89.9633	187.201	170.758	175.295	3.70609	3.5271	3.87427	9.01991	8.02306	5.32093	5.22234	4.4223
pgaptmp_005063	pgaptmp_005063	pgaptmp_005063	protein_coding	protein_coding	pgaptmp_005063	0.4431	510				TRUE	-1.24221	0.000604465	0.0046826	Chromosome_II	2027078	2027587	510	+	7.25241	110.242	100.333	89.8514	234.463	200.04	272.965	214.57	126.124	144.974	129.152	97.9626	101.893	108.996	87.685	113.301	180.342	189.074	215.647	197.26	175.218	342.282	8.90707	8.13049	7.35352	24.7667	20.281	26.1981	20.0324	10.7465
pgaptmp_004174	pgaptmp_004174	pgaptmp_004174	protein_coding	protein_coding	pgaptmp_004174	0.3245	567				TRUE	-0.910696	0.000605725	0.00468546	Chromosome_II	1013510	1014076	567	+	8.99138	279.074	321.243	321.015	500.315	539.356	691.072	498.189	386.582	425.774	635.671	640.385	600.239	555.288	463.953	388.649	864.628	695.046	628.42	683.425	519.283	459.422	20.2812	23.4149	23.631	47.5363	49.1854	59.6586	41.8354	29.6276
pgaptmp_004253	pgaptmp_004253	pgaptmp_004253	protein_coding	protein_coding	pgaptmp_004253	0.4699	615				TRUE	-0.846634	0.000607338	0.00469104	Chromosome_II	1103316	1103930	615	-	8.82086	273.678	301	312.846	534.908	506.585	717.462	435.822	373.149	360.325	558.987	437.203	552.072	514.047	485.042	483.506	438.213	475.348	429.971	610.221	493.797	427.852	18.3367	20.2271	21.2323	46.8563	42.5913	57.1027	33.7417	26.366
pgaptmp_003382	pgaptmp_003382	pgaptmp_003382	protein_coding	protein_coding	pgaptmp_003382	0.4524	756				TRUE	-0.709086	0.000609601	0.00470162	Chromosome_II	118678	119433	756	+	6.56432	79.405	86.2515	98.8365	185.136	182.971	172.356	202.691	165.678	180.866	64.5761	52.6095	40.757	35.3499	65.4862	77.7298	40.4505	41.2767	85.9943	150.879	142.086	131.263	4.32797	4.71505	5.45678	13.1927	12.5143	11.1593	12.7657	9.52315
pgaptmp_003802	pgaptmp_003802	soxR	protein_coding	protein_coding	pgaptmp_003802	0.4444	432	GO:0006355,GO:0006979	GO:0003700,GO:0051537		TRUE	-0.688128	0.000612558	0.00471751	Chromosome_II	557955	558386	432	+	7.2403	132.599	171.623	147.846	267.134	225.301	165.758	210.115	209.71	210.424	115.026	114.29	98.1873	103.104	124.313	82.9996	97.7553	78.5588	119.069	247.553	218.545	240.096	12.6478	16.4185	14.2846	33.3127	26.9664	18.7813	23.1583	21.0946
pgaptmp_004315	pgaptmp_004315	pgaptmp_004315	protein_coding	protein_coding	pgaptmp_004315	0.4648	1635				TRUE	1.17448	0.000616467	0.00474067	Chromosome_II	1170983	1172617	1635	-	8.24007	1262.77	940.845	762.92	670.077	596.705	334.815	1026.82	973.919	1138.68	98.8822	79.8213	90.777	69.2269	112.104	100.126	92.699	141.14	157.436	329.698	429.444	491.823	31.8248	23.7816	19.4761	22.0786	18.8706	10.0235	29.9026	25.8847
pgaptmp_004294	pgaptmp_004294	pgaptmp_004294	protein_coding	protein_coding	pgaptmp_004294	0.4444	882				TRUE	-0.600553	0.000623342	0.0047822	Chromosome_II	1146156	1147037	882	+	9.48139	740.857	726.096	820.098	1297.23	1085.54	1375.55	1195.36	1101.54	1180.2	452.033	457.159	353.845	589.165	521.67	296.427	461.809	482.005	316.194	1138.3	1017.54	1162.26	34.6118	34.0226	38.8095	79.2343	63.6387	76.3378	64.53	54.2709
pgaptmp_000154	pgaptmp_000154	pgaptmp_000154	protein_coding	protein_coding	pgaptmp_000154	0.4588	741				TRUE	0.84795	0.000624517	0.0047822	Chromosome_I	160553	161293	741	+	8.95389	867.288	706.734	711.46	472.769	438.995	375.224	467.748	597.785	570.749	316.827	333.798	385.339	483.116	533.879	538.839	460.124	672.41	639.004	328.58	424.347	453.607	48.2285	39.4166	40.075	34.3712	30.6327	24.7859	30.0557	35.0561
pgaptmp_005216	pgaptmp_005216	pgaptmp_005216	protein_coding	protein_coding	pgaptmp_005216	0.3986	444				TRUE	-1.39086	0.000624596	0.0047822	Chromosome_II	2187986	2188429	444	-	6.63889	34.6915	28.1637	57.995	81.9979	95.5821	130.298	66.8212	41.7927	57.0045	123.098	132.431	151.912	204.735	118.763	142.285	232.59	166.438	181.249	140.261	107.68	86.4013	3.21958	2.62149	5.45191	9.9491	11.1311	14.3644	7.16579	4.0903
pgaptmp_002201	pgaptmp_002201	pgaptmp_002201	protein_coding	protein_coding	pgaptmp_002201	0.4652	417				TRUE	0.674859	0.000631399	0.00482657	Chromosome_I	2385295	2385711	417	-	9.74758	988.323	925.883	914.034	501.597	591.926	523.665	739.487	844.063	761.468	1011.02	1093.92	1037.45	1095.85	1024.47	1063.19	1451.16	1310.2	1448.67	486.724	597.654	599.824	97.661	91.7617	91.4886	64.8011	73.3965	61.4681	84.436	87.9582
pgaptmp_002061	pgaptmp_002061	bioA	protein_coding	protein_coding	pgaptmp_002061	0.4765	1278	GO:0009102	GO:0004015,GO:0030170		TRUE	0.665035	0.000632225	0.00482657	Chromosome_I	2225837	2227114	1278	+	6.77224	153.414	166.342	151.114	99.9349	102.409	98.1356	97.2619	74.6298	99.2301	147.314	105.219	127.829	116.36	92.1247	86.952	99.4407	111.846	121.715	89.4096	98.7594	86.4013	4.94642	5.37914	4.9353	4.2126	4.14336	3.75862	3.62364	2.53757
pgaptmp_001141	pgaptmp_001141	pgaptmp_001141	protein_coding	protein_coding	pgaptmp_001141	0.4523	975				TRUE	0.648411	0.000634552	0.00483731	Chromosome_I	1211434	1212408	975	+	6.11763	124.889	122.336	128.242	74.3106	103.775	73.3955	92.8072	91.7946	109.083	56.5041	54.4236	37.0518	41.2416	66.5962	48.7458	42.1359	42.6082	30.4287	77.6746	72.6359	69.7856	5.27812	5.18552	5.48995	4.10592	5.50341	3.68466	4.53221	4.09119
pgaptmp_003310	pgaptmp_003310	pgaptmp_003310	protein_coding	protein_coding	pgaptmp_003310	0.4693	1353	GO:0006855	GO:0042910	GO:0016020	TRUE	-0.696451	0.000636459	0.00484483	Chromosome_II	47406	48758	1353	+	8.86872	288.325	296.599	287.524	411.911	418.513	471.71	355.637	359.716	350.472	613.473	464.415	659.522	519.939	608.245	687.711	744.962	573.879	769.98	383.344	498.894	480.192	8.78098	9.05971	8.86988	16.401	15.9939	17.0652	12.5153	11.5531
pgaptmp_004279	pgaptmp_004279	pgaptmp_004279	protein_coding	protein_coding	pgaptmp_004279	0.413	828				TRUE	0.943042	0.000643804	0.00488268	Chromosome_II	1131000	1131827	828	+	7.83748	530.395	745.459	720.445	456.113	487.469	515.418	617.724	618.681	629.865	94.8462	112.476	85.2192	75.1186	78.8055	93.5392	45.5068	55.9232	91.2862	365.462	342.153	265.019	26.3953	37.2079	36.3171	29.6761	30.4411	30.4693	35.522	32.4694
pgaptmp_003819	pgaptmp_003819	pgaptmp_003819	protein_coding	protein_coding	pgaptmp_003819	0.437	1602				TRUE	-0.699961	0.000644004	0.00488268	Chromosome_II	580302	581903	1602	+	9.43984	555.064	479.664	500.717	746.309	881.404	597.06	665.984	857.496	819.176	809.219	807.284	792.909	733.511	742.547	878.742	503.945	520.619	571.531	709.13	780.518	910.536	14.2771	12.3742	13.0458	25.0969	28.4483	18.2427	19.794	23.2599
pgaptmp_003672	pgaptmp_003672	pgaptmp_003672	protein_coding	protein_coding	pgaptmp_003672	0.4472	123				TRUE	-0.726663	0.000645257	0.00488268	Chromosome_II	428498	428620	123	-	6.01278	54.7355	71.2895	69.4306	108.903	96.9476	60.2008	87.61	76.8687	110.49	52.4681	68.9366	48.1674	26.5124	46.6173	36.8887	28.6524	38.6137	51.5966	97.7918	105.768	118.802	18.3367	23.9531	23.5606	47.6981	40.7545	23.9569	33.9142	27.157
pgaptmp_002706	pgaptmp_002706	pgaptmp_002706	protein_coding	protein_coding	pgaptmp_002706	0.4452	447				TRUE	0.829638	0.000645744	0.00488268	Chromosome_I	2929160	2929606	447	+	9.47361	3932.48	4647.9	4774.38	2458.02	1957.39	2786.56	5314.51	3688.95	3809.45	68.6121	70.7507	100.04	95.7394	89.9048	111.984	109.553	114.51	104.516	2699.05	2438.4	1983.91	362.507	429.725	445.81	296.238	226.419	305.136	566.094	358.619
pgaptmp_003195	pgaptmp_003195	pgaptmp_003195	protein_coding	protein_coding	pgaptmp_003195	0.4485	582				TRUE	0.570889	0.000646073	0.00488268	Chromosome_I	3463455	3464036	582	+	11.4588	2714.42	2672.03	2604.87	1607.93	1870.68	1635.32	2473.13	2835.19	2629.25	7182.07	6703.18	7238.07	4418.74	3418.6	3383.22	2548.38	2892.03	2427.68	1683.7	1640.68	1803.63	192.182	189.741	186.812	148.836	166.196	137.535	202.328	211.688
pgaptmp_001741	pgaptmp_001741	pgaptmp_001741	protein_coding	protein_coding	pgaptmp_001741	0.4689	819	GO:0006629	GO:0016491		TRUE	0.726608	0.00064704	0.00488297	Chromosome_I	1840770	1841588	819	+	7.36927	310.682	286.918	357.772	262.009	252.61	204.518	256.89	277.623	285.726	92.8282	121.546	101.893	126.671	104.334	140.968	55.6194	91.8739	59.5345	195.025	181.59	163.664	15.6311	14.4782	18.2332	17.2344	15.9482	12.2231	14.9347	14.7302
pgaptmp_002014	pgaptmp_002014	pgaptmp_002014	protein_coding	protein_coding	pgaptmp_002014	0.4653	1743				TRUE	1.42193	0.000648023	0.00488338	Chromosome_I	2180168	2181910	1743	-	9.00131	1734.58	1218.96	1058.61	633.562	731.203	352.133	935.496	1285.12	1278.73	157.404	183.226	181.554	266.597	279.704	312.237	340.458	303.583	1109.99	319.081	482.328	628.071	41.0066	28.9024	25.3502	19.5819	21.6913	9.88878	25.5551	32.0395
pgaptmp_002306	pgaptmp_002306	pgaptmp_002306	protein_coding	protein_coding	pgaptmp_002306	0.4299	1998				TRUE	0.646552	0.000649903	0.00488367	Chromosome_I	2508486	2510483	1998	-	9.11607	1398.45	1681.9	1697.37	1191.53	1060.96	1030.84	1538.37	1269.45	1366.7	131.17	197.739	161.175	160.548	129.863	154.142	369.11	312.904	207.709	1017.03	963.382	913.029	28.841	34.7894	35.4587	32.1273	27.4567	25.2538	36.6605	27.6095
pgaptmp_003078	pgaptmp_003078	pgaptmp_003078	protein_coding	protein_coding	pgaptmp_003078	0.458	858		GO:0005524,GO:0016887,GO:0042626,GO:0140359		TRUE	0.567759	0.000649918	0.00488367	Chromosome_I	3328038	3328895	858	-	9.21841	772.465	817.629	775.172	587.438	624.015	540.983	705.334	812.718	703.056	405.619	482.556	503.905	658.392	509.461	516.442	581.475	587.194	620.482	493.988	515.46	504.284	37.0979	39.3831	37.7096	36.8841	37.6055	30.8623	39.1418	41.1614
pgaptmp_001738	pgaptmp_001738	pgaptmp_001738	protein_coding	protein_coding	pgaptmp_001738	0.4082	267				TRUE	-0.791128	0.000650967	0.00488457	Chromosome_I	1838326	1838592	267	+	8.83966	218.171	199.787	191.955	310.055	257.389	418.932	225.707	168.663	185.089	1372.24	1168.29	1443.17	580.328	684.831	690.346	1447.79	960.016	1065.01	338.639	280.349	407.914	33.6701	30.9241	30.0075	62.5592	49.8451	76.8006	40.2501	27.4503
pgaptmp_004452	pgaptmp_004452	pgaptmp_004452	protein_coding	protein_coding	pgaptmp_004452	0.4487	780				TRUE	-0.646382	0.000658205	0.00493185	Chromosome_II	1321039	1321818	780	+	7.8815	204.295	193.626	186.237	254.322	241.686	296.881	343.758	256.726	261.095	173.548	235.836	211.195	206.208	185.359	217.38	163.487	272.959	240.784	287.228	314.756	281.635	10.7925	10.2591	9.96583	17.5652	16.0214	18.6303	20.9841	14.3025
pgaptmp_005019	pgaptmp_005019	pgaptmp_005019	protein_coding	protein_coding	pgaptmp_005019	0.4498	927		GO:0016740		TRUE	-0.867201	0.000662378	0.0049496	Chromosome_II	1975551	1976477	927	-	10.9551	1266.63	1439.87	1560.96	2246.61	2311.72	2626.57	2001.66	1762.01	1787.55	1632.56	1761.51	1745.14	2037.04	2080.02	2238.35	2507.93	2166.36	1928.92	2975.11	2349.2	2081.94	56.3024	64.1927	70.2836	130.561	128.944	138.689	102.812	82.5973
pgaptmp_004140	pgaptmp_004140	pgaptmp_004140	protein_coding	protein_coding	pgaptmp_004140	0.4316	1719				TRUE	-0.575162	0.00066276	0.0049496	Chromosome_II	967865	969583	1719	+	8.5319	320.704	356.447	338.168	451.629	534.577	375.224	399.442	343.297	409.588	326.917	330.17	281.594	362.337	356.29	293.792	338.773	310.241	301.642	468.842	461.302	523.392	7.68752	8.56961	8.21103	14.1537	16.0797	10.6843	11.064	8.67824
pgaptmp_001595	pgaptmp_001595	pgaptmp_001595	protein_coding	protein_coding	pgaptmp_001595	0.4571	1374				TRUE	0.620759	0.000663397	0.0049496	Chromosome_I	1661577	1662950	1374	-	6.37374	127.202	149.62	139.678	126.2	114.016	118.752	127.703	111.945	109.786	56.5041	76.1931	66.6933	58.9165	65.4862	63.2378	30.3378	37.2822	44.9816	81.0275	81.5561	88.0628	3.81475	4.50033	4.24309	4.94808	4.29064	4.23046	4.42533	3.54041
pgaptmp_001944	pgaptmp_001944	pgaptmp_001944	protein_coding	protein_coding	pgaptmp_001944	0.4685	2286				TRUE	0.602715	0.000666024	0.00496089	Chromosome_I	2097060	2099345	2286	-	7.9935	235.902	227.07	216.46	183.214	210.963	190.498	152.946	229.86	199.164	322.881	326.542	329.761	435.982	440.645	412.363	353.941	419.424	465.692	138.585	138.9	142.064	4.25221	4.10512	3.95223	4.31764	4.77172	4.07895	3.18563	4.36942
pgaptmp_005208	pgaptmp_005208	pgaptmp_005208	protein_coding	protein_coding	pgaptmp_005208	0.4709	894	GO:0006355	GO:0003677,GO:0003700		TRUE	-0.639509	0.000666796	0.00496089	Chromosome_II	2178887	2179780	894	+	8.1933	337.664	296.599	317.747	444.582	393.252	266.368	466.263	494.049	519.375	189.692	217.695	192.669	141.4	195.349	225.285	170.229	181.085	198.448	440.342	464.488	525.054	15.5634	13.7112	14.8349	26.7904	22.7446	14.584	24.8328	24.0143
pgaptmp_000268	pgaptmp_000268	pgaptmp_000268	protein_coding	protein_coding	pgaptmp_000268	0.4522	3171				TRUE	0.610321	0.000669734	0.00497571	Chromosome_I	280713	283883	3171	+	10.8545	2291.95	2209.09	2069.03	1557.96	1586.66	1237	1651.23	1912.02	1783.33	1142.19	1542	1170.84	2146.04	2319.77	1789.1	2438.83	2366.09	8427.44	1288.06	1324.01	1492.91	29.783	28.7912	27.234	26.4682	25.8721	19.0945	24.7938	26.2019
pgaptmp_001914	pgaptmp_001914	pgaptmp_001914	protein_coding	protein_coding	pgaptmp_001914	0.4342	1338				TRUE	0.628981	0.000684435	0.00507072	Chromosome_I	2058994	2060331	1338	-	9.35486	1088.54	1228.64	1305.3	777.058	709.356	740.552	1247.33	1127.66	1174.57	391.493	426.319	409.423	416.835	394.027	511.172	399.448	375.485	324.132	695.719	798.358	726.934	33.5234	37.95	40.7187	31.2868	27.4127	27.0915	44.3872	36.6233
pgaptmp_004327	pgaptmp_004327	pgaptmp_004327	protein_coding	protein_coding	pgaptmp_004327	0.4667	435		GO:0016790		TRUE	-0.684612	0.000684451	0.00507072	Chromosome_II	1186335	1186769	435	+	8.87002	366.188	465.582	443.539	629.078	439.678	663.858	700.88	522.408	568.638	282.52	304.772	340.877	324.041	372.939	364.935	455.068	492.657	484.214	710.248	593.193	659.64	34.6875	44.2332	42.5582	77.9075	52.2624	74.6997	76.7162	52.1865
pgaptmp_004221	pgaptmp_004221	pgaptmp_004221	protein_coding	protein_coding	pgaptmp_004221	0.4353	618		GO:0015288	GO:0009279	TRUE	-1.15589	0.000686761	0.00507761	Chromosome_II	1070817	1071434	618	+	15.139	20394.8	26498.6	31790.2	52235.2	52411.1	86275.2	44814.7	33952.1	34467.3	34808.5	43346.6	44730.8	19717.9	21727	27276.6	24538.3	25916.4	28964.2	68070.9	51716.8	46348.5	1359.84	1772.05	2147.07	4553.44	4385.09	6833.29	3452.75	2387.35
pgaptmp_004836	pgaptmp_004836	pgaptmp_004836	protein_coding	protein_coding	pgaptmp_004836	0.4642	894	GO:0006355	GO:0003677,GO:0003700		TRUE	-0.582439	0.000687312	0.00507761	Chromosome_II	1761247	1762140	894	-	8.85786	450.219	471.743	495.816	768.09	688.191	516.243	674.894	627.636	630.569	330.953	299.33	383.486	278.381	361.839	342.538	264.613	364.833	313.548	639.838	714.253	678.748	20.7513	21.8077	23.1486	46.2848	39.803	28.265	35.9443	30.5076
pgaptmp_001372	pgaptmp_001372	pgaptmp_001372	protein_coding	protein_coding	pgaptmp_001372	0.41	522		GO:0008080,GO:0016746		TRUE	0.728457	0.000690525	0.0050932	Chromosome_I	1437519	1438040	522	+	7.73442	282.158	264.035	342.252	262.65	310.642	244.102	288.816	287.325	277.985	157.404	228.579	194.522	160.548	163.161	151.507	200.567	183.748	127.007	164.849	180.316	156.187	22.273	20.9042	27.3663	27.1063	30.7704	22.8893	26.3441	23.9188
pgaptmp_001603	pgaptmp_001603	pgaptmp_001603	protein_coding	protein_coding	pgaptmp_001603	0.4948	1152		GO:0042626,GO:0140359		TRUE	0.767939	0.000691359	0.0050932	Chromosome_I	1672559	1673710	1152	-	7.03109	100.22	89.7719	98.8365	69.1857	71.0039	78.3435	72.0184	71.6446	86.5624	552.933	595.032	666.933	356.445	290.803	254.269	109.553	161.112	111.131	45.2636	46.5125	62.3086	3.58476	3.22055	3.58101	3.2354	3.18694	3.32877	2.97662	2.70252
pgaptmp_000592	pgaptmp_000592	pgaptmp_000592	protein_coding	protein_coding	pgaptmp_000592	0.5031	1131				TRUE	0.677906	0.000694625	0.00510724	Chromosome_I	595921	597051	1131	+	9.40854	606.716	543.912	571.782	354.257	403.493	473.36	455.869	523.155	477.149	730.517	879.849	863.307	1676.18	1223.15	1266.07	1532.06	1434.03	1623.31	296.728	367.003	356.405	22.1045	19.875	21.1013	16.8741	18.4466	20.4862	19.1915	20.1004
pgaptmp_002239	pgaptmp_002239	glgA	protein_coding	protein_coding	pgaptmp_002239	0.4575	1458				TRUE	0.673892	0.000697474	0.00510724	Chromosome_I	2424547	2426004	1458	-	9.97627	1467.07	1261.21	1270.99	987.178	1039.8	826.318	982.271	1209.75	1153.46	1037.25	959.67	863.307	992.744	1000.05	963.059	1080.36	881.457	1065.01	721.424	830.216	835.766	41.462	35.7496	36.3852	36.4756	36.8752	27.741	32.0779	36.0558
pgaptmp_001670	pgaptmp_001670	pgaptmp_001670	protein_coding	protein_coding	pgaptmp_001670	0.4554	2655				TRUE	0.63354	0.000699026	0.00510724	Chromosome_I	1757712	1760366	2655	-	10.6036	2295.81	2250.46	2234.03	1489.41	1574.37	1189.17	1562.13	1701.56	1642.57	1850.51	1770.58	1572.85	1518.57	1730.39	1551.96	1046.66	1179.71	1102.05	1312.65	1256.47	1601.75	35.6311	35.0306	35.1209	30.2215	30.6611	21.9237	28.0147	27.8497
pgaptmp_001758	pgaptmp_001758	pgaptmp_001758	protein_coding	protein_coding	pgaptmp_001758	0.4579	843	GO:0006281,GO:0006310	GO:0003910,GO:0005524		TRUE	0.726032	0.000699168	0.00510724	Chromosome_I	1854495	1855337	843	-	6.01098	113.326	119.696	128.242	84.5603	86.7066	76.6942	109.141	81.3465	104.156	30.2701	45.353	27.7889	57.4436	39.9577	39.5236	28.6524	62.5808	42.3356	60.9103	59.2556	80.5858	5.53935	5.86804	6.34958	5.40385	5.31825	4.45315	6.16445	4.19323
pgaptmp_002060	pgaptmp_002060	bioB	protein_coding	protein_coding	pgaptmp_002060	0.4587	1053	GO:0009102	GO:0004076,GO:0051536,GO:1904047		TRUE	0.717406	0.000699538	0.00510724	Chromosome_I	2224655	2225707	1053	-	7.18832	259.801	220.909	216.46	128.122	152.249	98.9602	161.856	167.917	180.866	149.332	163.271	144.502	110.469	96.5645	114.618	107.868	114.51	165.374	122.379	142.086	132.094	10.1665	8.67016	8.58006	6.55479	7.476	4.60008	7.31867	6.92953
pgaptmp_003399	pgaptmp_003399	pgaptmp_003399	protein_coding	protein_coding	pgaptmp_003399	0.451	3093	GO:0055085	GO:0015267		TRUE	-0.566789	0.000700311	0.00510724	Chromosome_II	139343	142435	3093	-	7.67368	165.748	181.304	182.153	251.759	273.774	236.68	219.767	239.562	255.465	141.26	166.899	159.323	162.021	223.097	217.38	192.14	158.449	168.02	244.759	244.668	268.342	2.20815	2.42253	2.45809	4.385	4.57675	3.74554	3.38311	3.36569
pgaptmp_003737	pgaptmp_003737	pgaptmp_003737	protein_coding	protein_coding	pgaptmp_003737	0.4933	675		GO:0005524,GO:0016887,GO:0042626,GO:0140359		TRUE	-1.23862	0.000700322	0.00510724	Chromosome_II	496058	496732	675	+	5.87705	43.9426	36.0848	39.2079	74.3106	73.7348	49.4801	50.4871	93.2872	73.191	58.5221	74.379	53.7251	53.0249	39.9577	50.0632	33.7087	37.2822	60.8575	62.5867	107.042	131.263	2.6825	2.20934	2.42443	5.93077	5.64823	3.58806	3.56131	6.00559
pgaptmp_003894	pgaptmp_003894	pgaptmp_003894	protein_coding	protein_coding	pgaptmp_003894	0.4507	588	GO:0006355	GO:0003677,GO:0003700		TRUE	-1.00033	0.000701032	0.00510724	Chromosome_II	663243	663830	588	-	9.66206	466.408	603.76	609.356	893.649	754.416	1172.68	803.339	686.594	738.947	1144.21	1041.31	1091.18	820.413	764.746	807.599	657.32	752.301	560.947	1321.03	1039.84	843.243	32.6849	42.4354	43.2548	81.8755	66.3403	97.619	65.051	50.7411
pgaptmp_004843	pgaptmp_004843	pgaptmp_004843	protein_coding	protein_coding	pgaptmp_004843	0.3864	603		GO:0008080,GO:0016746		TRUE	-1.06005	0.000703657	0.00511928	Chromosome_II	1768910	1769512	603	-	11.1441	1595.04	2012.83	2232.4	3622.64	3154.21	4448.26	3185.88	2538.91	2667.95	1909.03	2302.12	1702.53	975.069	1134.35	1146.18	2339.38	1941.34	1518.79	4765.53	3812.11	2977.52	108.996	137.953	154.524	323.648	270.469	361.082	251.562	182.964
pgaptmp_003640	pgaptmp_003640	pgaptmp_003640	protein_coding	protein_coding	pgaptmp_003640	0.4832	1401				TRUE	-0.801848	0.000706505	0.00513289	Chromosome_II	395899	397299	1401	+	8.0155	148.788	186.585	174.802	363.866	359.798	289.459	216.798	241.054	231.537	215.926	263.048	270.478	310.785	284.144	308.284	234.276	294.263	292.381	307.346	311.57	240.096	4.37611	5.50402	5.20773	13.9916	13.279	10.113	7.36799	7.47677
pgaptmp_001979	pgaptmp_001979	pgaptmp_001979	protein_coding	protein_coding	pgaptmp_001979	0.4585	1158				TRUE	0.733556	0.000708524	0.00514046	Chromosome_I	2140057	2141214	1158	+	8.51836	775.548	662.728	691.856	330.554	366.626	270.491	484.082	551.514	566.526	246.196	290.259	214.901	293.11	285.254	299.062	207.309	259.644	279.151	344.227	435.816	436.16	27.5968	23.652	24.9372	15.3779	16.3704	11.4335	19.9041	20.696
pgaptmp_003242	pgaptmp_003242	punC	protein_coding	protein_coding	pgaptmp_003242	0.4652	1206	GO:1990961	GO:0042910	GO:0016020	TRUE	0.700994	0.000711417	0.00514946	Chromosome_I	3511227	3512432	1206	+	13.1979	12546	13172.7	13752.2	9847.43	8820.18	8736.54	15406	15894.7	14838.1	5880.46	6978.93	7301.06	6413.07	6359.94	6784.89	7650.19	7893.17	18995.5	7171.21	8503.5	7430.51	428.663	451.408	475.954	439.886	378.159	354.589	608.24	572.718
pgaptmp_002533	pgaptmp_002533	pgaptmp_002533	protein_coding	protein_coding		0.5	1000				TRUE	-1.18153	0.000712366	0.00514946	pgaptmp_002533	1	1000	1000	+	13.853	5192.16	4980.58	7111.33	10135.7	11228.9	15784.2	5436.27	5036.76	4302.08	54532.5	53489.4	49254.8	23126.2	18499.3	21453.4	45865.8	32542	27286.6	15601.4	12131.5	9451.8	213.947	205.836	296.819	546.032	580.603	772.599	258.842	218.871
pgaptmp_003482	pgaptmp_003482	pgaptmp_003482	protein_coding	protein_coding	pgaptmp_003482	0.4225	864				TRUE	-0.728713	0.000713234	0.00514946	Chromosome_II	228892	229755	864	+	7.53981	100.22	122.336	143.762	190.901	179.558	179.778	235.359	191.052	215.35	193.728	172.342	142.65	259.233	298.573	345.173	165.173	147.797	164.051	186.084	195.607	210.188	4.77968	5.85171	6.945	11.9031	10.7457	10.1849	12.9703	9.60895
pgaptmp_001986	pgaptmp_001986	pgaptmp_001986	protein_coding	protein_coding	pgaptmp_001986	0.4473	1044		GO:0051536		TRUE	0.970113	0.00071368	0.00514946	Chromosome_I	2148455	2149498	1044	+	7.159	385.461	321.243	247.5	258.806	307.228	137.72	141.809	258.219	235.759	115.026	107.033	101.893	69.2269	78.8055	67.1901	62.3611	86.5479	60.8575	136.908	143.36	176.956	15.2138	12.7167	9.89499	13.3548	15.2161	6.45696	6.46751	10.7479
pgaptmp_003539	pgaptmp_003539	cfa	protein_coding	protein_coding	pgaptmp_003539	0.4729	1146				TRUE	-0.695915	0.000716483	0.005157	Chromosome_II	292811	293956	1146	-	7.14073	88.6561	114.415	102.104	161.433	142.69	105.558	163.341	159.708	182.977	127.134	125.174	113.008	138.454	152.061	180.491	131.464	155.786	169.343	144.732	160.564	179.449	3.18774	4.12611	3.71876	7.5888	6.43805	4.50856	6.78644	6.0559
pgaptmp_001363	pgaptmp_001363	pgaptmp_001363	protein_coding	protein_coding	pgaptmp_001363	0.4235	510				TRUE	0.611487	0.000716686	0.005157	Chromosome_I	1430954	1431463	510	-	8.38702	501.871	567.675	588.118	538.752	627.428	439.548	556.843	557.484	564.415	191.71	172.342	172.291	215.045	220.877	208.158	215.736	202.389	228.877	310.14	358.082	358.067	40.549	46.0014	48.1322	56.9092	63.6118	42.1861	51.9871	47.5007
pgaptmp_005281	pgaptmp_005281	pgaptmp_005281	protein_coding	protein_coding	pgaptmp_005281	0.4463	726				TRUE	-0.685793	0.00071952	0.00515778	Chromosome_II	2263276	2264001	726	-	10.0351	1416.96	1467.15	1599.35	3598.94	3401.36	2738.72	4081.29	4228.52	4275.34	173.548	319.285	192.669	328.46	188.689	233.189	480.349	466.027	783.21	2026.8	2600.24	2252.25	80.4226	83.5182	91.9494	267.056	242.248	184.648	267.666	253.099
pgaptmp_005188	pgaptmp_005188	pgaptmp_005188	protein_coding	protein_coding	pgaptmp_005188	0.4689	981				TRUE	-0.793673	0.000719721	0.00515778	Chromosome_II	2158605	2159585	981	+	11.1252	1848.67	1640.54	1437.62	1233.17	1492.45	1232.88	1622.27	1734.4	1787.55	3472.98	3272.68	3303.17	3509.95	3877.01	3766.6	2170.84	2410.03	2112.81	2446.47	2547.36	3204.32	77.6514	69.1129	61.1669	67.7203	78.6636	61.5155	78.7384	76.8275
pgaptmp_002004	pgaptmp_002004	pgaptmp_002004	protein_coding	protein_coding	pgaptmp_002004	0.4548	963				TRUE	0.557609	0.000719736	0.00515778	Chromosome_I	2170845	2171807	963	+	10.2774	1330.61	1360.66	1436.81	907.102	966.745	914.557	980.044	1087.36	1049.31	1463.05	1543.82	1641.4	1643.77	1664.9	1818.09	1392.17	1430.04	1528.05	828.715	893.295	946.26	56.9356	58.3936	62.2748	50.7451	51.9074	46.4855	48.4565	49.0663
pgaptmp_003658	pgaptmp_003658	pgaptmp_003658	protein_coding	protein_coding	pgaptmp_003658	0.4577	555		GO:0016407		TRUE	-0.611477	0.000721361	0.0051624	Chromosome_II	415380	415934	555	+	8.98855	474.888	528.95	578.316	731.575	605.581	726.533	1075.82	947.052	958.52	205.836	175.97	259.363	278.381	332.981	335.951	387.65	388.8	689.277	721.424	809.19	781.765	35.2579	39.388	43.4924	71.0117	56.4187	64.076	92.2953	74.1512
pgaptmp_003474	pgaptmp_003474	ompV	protein_coding	protein_coding	pgaptmp_003474	0.4453	777				TRUE	-0.895093	0.000723463	0.0051704	Chromosome_II	223608	224384	777	-	7.94629	164.977	168.982	240.965	281.227	278.554	306.777	363.062	279.115	299.802	236.106	261.234	257.51	197.37	152.061	196.301	222.477	219.698	173.312	381.109	345.976	305.728	8.74907	8.98798	12.9442	19.4985	18.5367	19.3257	22.2481	15.6099
pgaptmp_005068	pgaptmp_005068	pgaptmp_005068	protein_coding	protein_coding	pgaptmp_005068	0.4258	660				TRUE	-0.663218	0.000729459	0.00520618	Chromosome_II	2031131	2031790	660	-	6.17034	61.6738	68.6491	66.9801	113.388	102.409	117.928	128.445	94.0335	126.677	42.3781	48.9813	25.9363	51.552	44.3975	43.476	60.6757	54.5917	63.5035	92.2037	110.228	108.002	3.85048	4.29866	4.23587	9.25521	8.02306	8.7459	9.2663	6.19122
pgaptmp_003945	pgaptmp_003945	pgaptmp_003945	protein_coding	protein_coding	pgaptmp_003945	0.4491	933		GO:0000166,GO:0016491		TRUE	-0.60667	0.000743448	0.00528042	Chromosome_II	713445	714377	933	-	8.84547	435.571	422.456	487.648	636.124	614.456	475.009	524.175	614.949	586.935	359.205	419.062	405.717	287.218	325.211	358.347	362.369	319.561	378.375	597.927	661.369	706.995	19.2369	18.7129	21.8155	36.7303	34.0528	24.9203	26.7502	28.6415
pgaptmp_001241	pgaptmp_001241	pgaptmp_001241	protein_coding	protein_coding	pgaptmp_001241	0.4804	1884	GO:0006935			TRUE	0.719837	0.000743879	0.00528042	Chromosome_I	1324479	1326362	1884	+	13.6408	15389.2	15021	15186.5	10383.6	11152.4	7289.25	8022.99	10228.8	9112.98	20373.8	20303.6	20287.7	17736.8	18281.8	18138.7	13463.3	13460.2	12773.5	8122.31	8047.3	10291.7	336.583	329.502	336.448	296.915	306.077	189.38	202.763	235.928
pgaptmp_000158	pgaptmp_000158	pgaptmp_000158	protein_coding	protein_coding	pgaptmp_000158	0.4541	588				TRUE	-1.02544	0.000744097	0.00528042	Chromosome_I	164456	165043	588	+	12.3933	2535.56	3442.14	3638.16	4814.17	5174.41	9792.12	3871.17	2773.24	2961.42	5761.4	7604.8	6973.15	6538.26	4558.51	5387.07	10871.1	9708.01	7624.39	7731.7	5594.24	5251.37	177.687	241.932	258.253	441.071	455.016	815.14	313.471	204.95
pgaptmp_004396	pgaptmp_004396	pgaptmp_004396	protein_coding	protein_coding	pgaptmp_004396	0.4615	1014	GO:0006355	GO:0003700,GO:0043565		TRUE	0.569903	0.000744633	0.00528042	Chromosome_II	1260852	1261865	1014	-	8.0689	471.034	509.588	490.915	398.459	346.827	348.01	585.799	608.233	593.973	133.188	103.405	111.155	120.779	145.402	163.364	188.769	175.759	174.635	292.258	324.95	320.682	19.1413	20.7693	20.2074	21.1694	17.6855	16.7991	27.507	26.0657
pgaptmp_004421	pgaptmp_004421	pgaptmp_004421	protein_coding	protein_coding	pgaptmp_004421	0.4519	489				TRUE	-0.893455	0.000744881	0.00528042	Chromosome_II	1291995	1292483	489	-	8.50385	144.933	199.787	219.727	349.132	356.385	602.008	279.906	213.441	218.869	415.709	524.281	448.327	518.466	372.939	417.633	623.611	652.438	711.768	387.814	287.995	338.128	12.2129	16.8849	18.755	38.4631	37.6838	60.2596	27.2544	18.9674
pgaptmp_001760	pgaptmp_001760	pgaptmp_001760	protein_coding	protein_coding	pgaptmp_001760	0.4888	849		GO:0015288,GO:0042834		TRUE	0.784206	0.000750755	0.0053124	Chromosome_I	1856004	1856852	849	+	5.88038	88.6561	88.8918	90.6682	68.5451	58.7147	66.7982	69.791	61.1964	76.006	34.3061	36.2824	53.7251	61.8624	62.1564	73.7774	43.8213	51.9287	39.6897	48.0577	52.2469	38.2159	4.30288	4.32709	4.45747	4.34944	3.57588	3.85114	3.91403	3.13225
pgaptmp_004207	pgaptmp_004207	pgaptmp_004207	protein_coding	protein_coding	pgaptmp_004207	0.4176	534			GO:0005886	TRUE	-1.08003	0.00075237	0.0053124	Chromosome_II	1057949	1058482	534	-	10.184	415.527	595.839	605.272	883.399	839.074	1552.03	905.055	608.233	692.499	2163.3	2389.2	2354.64	1574.54	1425.16	1470.28	2275.34	2070.49	1553.19	1363.5	1030.28	864.843	32.0639	46.1136	47.3097	89.121	81.2462	142.263	80.6987	49.4955
pgaptmp_002088	pgaptmp_002088	pgaptmp_002088	protein_coding	protein_coding	pgaptmp_002088	0.4405	933	GO:0005975	GO:0019200	GO:0005829	TRUE	0.621128	0.000753322	0.0053124	Chromosome_I	2261685	2262617	933	-	7.40878	337.664	345.006	359.406	254.322	259.437	204.518	273.967	328.371	290.653	80.7201	114.29	96.3347	72.1728	105.444	118.571	85.9572	67.9068	89.9633	210.671	229.377	196.895	14.9129	15.2822	16.0784	14.6847	14.3779	10.7296	13.9813	15.294
pgaptmp_004981	pgaptmp_004981	azu	protein_coding	protein_coding	pgaptmp_004981	0.4702	453		GO:0005507,GO:0009055		TRUE	-0.591978	0.000753431	0.0053124	Chromosome_II	1918490	1918942	453	+	8.96503	393.942	471.743	456.608	688.014	488.834	862.603	1278.51	782.866	902.22	262.34	424.504	274.183	173.804	155.391	168.634	756.761	797.572	935.353	650.455	629.511	627.24	35.8337	43.0377	42.0714	81.8207	55.7965	93.2064	134.381	75.0977
pgaptmp_002289	pgaptmp_002289	ycfP	protein_coding	protein_coding	pgaptmp_002289	0.4259	540				TRUE	0.782977	0.000755703	0.00532129	Chromosome_I	2487506	2488045	540	-	11.2043	6323.11	7238.08	7709.25	4872.47	3979.63	5381.79	8744.66	6578.62	6810.98	617.509	671.225	628.028	478.697	630.444	635.013	1375.32	1025.26	1117.93	4526.92	3761.14	3444.42	482.498	553.951	595.881	486.093	381.06	487.827	771.049	529.393
pgaptmp_003597	pgaptmp_003597	pgaptmp_003597	protein_coding	protein_coding	pgaptmp_003597	0.4489	2085				TRUE	-0.909953	0.000759636	0.00533857	Chromosome_II	347951	350035	2085	+	10.651	1241.19	1047.34	1103.54	2417.02	2746.62	1665.83	1826.44	2185.91	2206.99	1479.2	1563.77	1602.49	1290.27	1320.82	1197.57	1324.75	1355.47	1386.49	1588.7	1962.44	2579.58	24.5295	20.7598	22.0914	62.4508	68.114	39.1073	41.7093	45.5578
pgaptmp_004561	pgaptmp_004561	pgaptmp_004561	protein_coding	protein_coding	pgaptmp_004561	0.4717	477		GO:0016531		TRUE	-0.935273	0.000760188	0.00533857	Chromosome_II	1445267	1445743	477	+	9.11731	388.545	462.941	472.945	712.997	617.187	899.713	913.222	738.835	735.429	801.147	703.879	698.427	309.312	411.786	331.998	352.256	276.953	305.61	1028.21	692.59	702.841	33.5646	40.1097	41.3841	80.5256	66.9025	92.3248	91.1572	67.308
pgaptmp_001851	pgaptmp_001851	pgaptmp_001851	protein_coding	protein_coding	pgaptmp_001851	0.4314	408				TRUE	0.746575	0.00076243	0.00534718	Chromosome_I	1981844	1982251	408	+	6.99073	191.96	227.95	205.841	155.027	156.345	153.388	193.781	184.336	187.904	88.7922	67.1225	96.3347	92.7936	82.1353	65.8727	106.182	117.173	108.485	125.173	121.697	98.0322	19.3869	23.0899	21.0578	20.4697	19.8138	18.402	22.6144	19.633
pgaptmp_003383	pgaptmp_003383	ribA	protein_coding	protein_coding	pgaptmp_003383	0.4712	1059		GO:0003935		TRUE	-0.818658	0.000764967	0.00535782	Chromosome_II	119529	120587	1059	-	6.17499	86.3433	88.0117	84.9504	131.325	164.538	141.018	118.051	117.915	152.012	16.144	25.3977	9.26295	66.2811	29.9683	32.9363	64.0465	49.2657	66.1495	163.173	165.661	121.294	3.35963	3.43468	3.34819	6.68059	8.03366	6.51797	5.30769	4.8385
pgaptmp_000641	pgaptmp_000641	pgaptmp_000641	protein_coding	protein_coding	pgaptmp_000641	0.4606	1626	GO:0006826	GO:0042626,GO:0140359		TRUE	-0.606218	0.000771736	0.00539805	Chromosome_I	653537	655162	1626	+	12.0883	3240.96	3408.69	3594.87	3628.41	4682.16	4895.23	2767.88	3048.63	2648.95	4562.71	5184.76	5013.11	5386.45	3952.48	4400.3	6731.63	6134.25	6350.35	5175.14	4985.12	4692.25	82.1318	86.6381	92.2792	120.215	148.891	147.362	81.0512	81.4744
pgaptmp_002307	pgaptmp_002307	pgaptmp_002307	protein_coding	protein_coding	pgaptmp_002307	0.4731	744				TRUE	0.790006	0.000784861	0.00548158	Chromosome_I	2510658	2511401	744	-	8.63855	1120.92	1459.23	1480.1	809.089	749.637	878.272	1715.82	1494.09	1348.4	50.4501	83.4496	75.9562	153.183	106.554	93.5392	155.06	153.123	178.604	673.925	856.339	690.379	62.0813	81.0576	83.0345	58.5851	52.0981	57.7815	109.807	87.2651
pgaptmp_004310	pgaptmp_004310	pgaptmp_004310	protein_coding	protein_coding	pgaptmp_004310	0.4426	540	GO:0022904	GO:0009055,GO:0020037,GO:0046872	GO:0016020	TRUE	-1.05365	0.000785763	0.00548158	Chromosome_II	1166239	1166778	540	+	9.3663	283.7	421.576	459.876	652.78	723.693	1012.69	651.878	578.381	546.117	490.375	526.095	533.546	827.778	619.344	675.854	1206.77	1066.54	1066.33	930.419	732.731	648.84	21.6483	32.2644	35.5458	65.1234	69.2954	91.7945	57.4784	46.5433
pgaptmp_001579	pgaptmp_001579	ectB	protein_coding	protein_coding	pgaptmp_001579	0.455	1266	GO:0019491	GO:0030170,GO:0047307		TRUE	0.720607	0.000789557	0.00550075	Chromosome_I	1644624	1645889	1266	+	5.48281	56.2774	51.0468	62.0791	49.9675	55.9838	42.0581	30.4407	91.7946	50.6707	30.2701	36.2824	57.4303	51.552	43.2875	36.8887	40.4505	50.5972	33.0747	26.8229	29.9464	33.2313	1.83172	1.66639	2.04669	2.12627	2.28651	1.62611	1.14487	3.1508
pgaptmp_003169	pgaptmp_003169	pgaptmp_003169	protein_coding	protein_coding	pgaptmp_003169	0.4829	1377	GO:0055085	GO:0022857		TRUE	-0.881909	0.000791077	0.00550148	Chromosome_I	3435843	3437219	1377	-	12.2608	2119.27	1791.92	1860.74	1794.99	1969.67	1455.54	2003.89	2178.44	2363.22	4603.07	6035.58	6120.96	13039.7	11254.8	16237.6	26587.7	27251.9	77593.3	2698.49	3264.79	4251.94	63.4176	53.7806	56.4018	70.2249	73.9613	51.7396	69.2904	68.7464
pgaptmp_005056	pgaptmp_005056	pgaptmp_005056	protein_coding	protein_coding	pgaptmp_005056	0.4308	195				TRUE	-0.650975	0.000791753	0.00550148	Chromosome_II	2021752	2021946	195	-	7.7201	181.167	193.626	175.619	440.098	336.586	256.472	288.816	323.147	391.994	234.088	137.873	196.375	82.4832	120.983	119.888	146.633	173.096	161.405	244.2	275.252	319.02	38.2827	41.0365	37.5904	121.585	89.2493	64.3781	70.5211	72.0117
pgaptmp_003387	pgaptmp_003387	pgaptmp_003387	protein_coding	protein_coding	pgaptmp_003387	0.4274	468				TRUE	-1.40975	0.000793071	0.00550337	Chromosome_II	123096	123563	468	+	8.51195	214.317	253.474	214.01	618.828	608.312	926.928	436.565	379.119	380.734	219.962	183.226	229.721	201.789	199.789	200.253	610.128	560.564	549.04	773.952	626.326	347.267	18.8698	22.3835	19.0866	71.2341	67.2085	96.9466	44.4156	35.202
pgaptmp_004038	pgaptmp_004038	pgaptmp_004038	protein_coding	protein_coding	pgaptmp_004038	0.4515	474		GO:0003755		TRUE	-0.982706	0.000798289	0.00553228	Chromosome_II	808790	809263	474	-	10.6882	981.385	1336.02	1502.97	2101.84	1771	2633.99	1982.36	1576.18	1581.35	2009.93	2040.89	1963.75	1041.35	1399.63	1356.98	1221.94	1255.61	1177.46	2901.9	2201.38	2072.8	85.3138	116.486	132.347	238.883	193.19	272	199.13	144.499
pgaptmp_003441	pgaptmp_003441	kduI	protein_coding	protein_coding	pgaptmp_003441	0.4664	834	GO:0045490	GO:0008697		TRUE	-0.845188	0.000800508	0.00553466	Chromosome_II	191477	192310	834	+	6.48703	58.5901	74.8099	69.4306	81.9979	109.919	83.2915	109.141	97.0187	109.083	68.6121	83.4496	92.6295	79.5373	134.302	130.428	58.9902	46.6027	87.3173	141.938	118.511	101.355	2.89479	3.7071	3.47477	5.29665	6.81479	4.88841	6.23097	5.05507
pgaptmp_001976	pgaptmp_001976	pgaptmp_001976	protein_coding	protein_coding	pgaptmp_001976	0.4886	1797		GO:0016491		TRUE	1.27526	0.000800737	0.00553466	Chromosome_I	2136425	2138221	1797	+	5.54752	160.352	107.374	77.5989	39.0771	64.8593	50.3048	64.5938	59.7038	48.5594	40.3601	32.6542	29.6415	44.1874	32.1882	32.9363	18.5398	25.2986	37.0437	43.5872	42.0524	38.2159	3.67692	2.46941	1.80239	1.17149	1.86624	1.37023	1.71149	1.44375
pgaptmp_003824	pgaptmp_003824	pgaptmp_003824	protein_coding	protein_coding	pgaptmp_003824	0.4258	1017		GO:0005525,GO:0046872	GO:0005886	TRUE	-0.918606	0.000803601	0.00554315	Chromosome_II	587900	588916	1017	-	7.59803	117.18	141.699	157.648	340.804	337.951	332.341	256.89	189.56	242.093	157.404	137.873	159.323	132.562	155.391	146.237	163.487	174.427	171.989	265.435	296.915	201.88	4.74779	5.7582	6.47008	18.0529	17.1821	15.9954	12.0271	8.09958
pgaptmp_003747	pgaptmp_003747	pgaptmp_003747	protein_coding	protein_coding	pgaptmp_003747	0.4826	1440				TRUE	-0.727014	0.000804072	0.00554315	Chromosome_II	503058	504497	1440	+	5.98658	45.4844	39.6053	40.8415	73.67	73.7348	66.7982	89.8373	82.0928	101.341	46.4141	67.1225	55.5777	54.4978	66.5962	65.8727	40.4505	57.2548	72.7644	63.1455	77.096	73.1088	1.30154	1.13666	1.18381	2.75608	2.64761	2.27057	2.97048	2.47731
pgaptmp_002039	pgaptmp_002039	hisG	protein_coding	protein_coding	pgaptmp_002039	0.4326	897	GO:0000105	GO:0003879	GO:0005737	TRUE	0.55467	0.000806126	0.00555003	Chromosome_I	2204235	2205131	897	-	10.4403	1746.14	1967.06	1811.73	1335.03	1414.62	1179.28	1395.82	1710.51	1674.24	1487.27	1317.05	1370.92	1411.05	1331.92	1376.74	1194.97	1275.58	990.919	1170.71	1211.87	1193.83	80.213	90.629	84.3028	80.1793	81.5436	64.3511	74.0917	82.8651
pgaptmp_004437	pgaptmp_004437	amyS	protein_coding	protein_coding	pgaptmp_004437	0.4541	1524				TRUE	-1.03098	0.000808047	0.00555141	Chromosome_II	1305428	1306951	1524	-	9.33286	477.972	522.789	527.673	1003.19	1258.27	945.07	654.105	649.279	665.053	516.609	752.86	668.785	474.278	462.843	424.22	493.833	486	408.804	1199.77	1072.34	709.487	12.9234	14.177	14.4518	35.462	42.6907	30.3537	20.436	18.5133
pgaptmp_003404	pgaptmp_003404	pgaptmp_003404	protein_coding	protein_coding	pgaptmp_003404	0.4411	900		GO:0001216		TRUE	-0.639168	0.000808438	0.00555141	Chromosome_II	147031	147930	900	+	8.41372	262.885	326.523	278.539	517.612	488.834	437.074	722.411	645.548	673.498	177.584	244.906	177.849	232.72	245.296	271.395	274.726	251.655	259.306	397.873	452.382	449.453	12.036	14.9939	12.9177	30.9832	28.0843	23.7709	38.2186	31.169
pgaptmp_001351	pgaptmp_001351	pgaptmp_001351	protein_coding	protein_coding	pgaptmp_001351	0.3465	381				TRUE	0.652093	0.000812174	0.00555553	Chromosome_I	1422890	1423270	381	+	7.17458	214.317	219.149	205.025	200.51	193.212	169.057	141.067	117.915	166.087	199.782	146.944	90.777	135.508	110.994	105.396	131.464	135.814	74.0874	140.261	112.777	126.279	23.1787	23.7715	22.4606	28.3515	26.2213	21.7191	17.6292	13.4487
pgaptmp_003189	pgaptmp_003189	pgaptmp_003189	protein_coding	protein_coding		0.5	1000				TRUE	-1.43988	0.000812802	0.00555553	pgaptmp_003189	1	1000	1000	+	12.8355	2009.8	2592.82	3020.64	5639.92	7507.29	11098.4	2562.22	2455.32	2259.77	22958.8	31052.3	25869.6	15069.4	7636.36	9209	16610	14080.7	11926.7	8961.64	6439.75	4170.52	82.8152	107.156	126.078	303.834	388.175	543.241	121.997	106.695
pgaptmp_001573	pgaptmp_001573	pgaptmp_001573	protein_coding	protein_coding	pgaptmp_001573	0.4336	1905				TRUE	0.558272	0.000813	0.00555553	Chromosome_I	1635475	1637379	1905	+	9.5573	1098.56	1086.94	1126.41	906.461	966.745	888.168	1019.39	1085.86	1115.46	567.059	691.18	550.22	611.259	515.01	442.664	675.86	551.243	486.86	656.043	729.545	753.519	23.7623	23.5806	24.6798	25.6341	26.2398	22.8209	25.4788	24.7695
pgaptmp_003647	pgaptmp_003647	pgaptmp_003647	protein_coding	protein_coding	pgaptmp_003647	0.4598	609				TRUE	-0.648508	0.000813262	0.00555553	Chromosome_II	403468	404076	609	-	6.83932	127.202	128.497	124.158	180.011	195.261	178.953	212.343	200.008	246.316	62.5581	59.866	44.4622	98.6852	77.6955	92.2218	38.765	66.5753	47.6276	167.084	204.528	209.357	8.60668	8.72002	8.50941	15.9238	16.5783	14.3832	16.6017	14.2714
pgaptmp_000201	pgaptmp_000201	pgaptmp_000201	protein_coding	protein_coding	pgaptmp_000201	0.4844	609		GO:0004784,GO:0046872		TRUE	-0.803452	0.000817216	0.0055753	Chromosome_I	219253	219861	609	-	9.72658	799.447	934.684	1244.85	1254.31	877.307	987.953	871.645	801.524	643.236	639.707	741.976	529.841	456.603	647.093	624.473	635.409	696.378	711.768	1621.67	1657.88	1677.35	54.0917	63.4292	85.318	110.956	74.4866	79.4057	68.1483	57.1922
pgaptmp_001225	pgaptmp_001225	pgaptmp_001225	protein_coding	protein_coding	pgaptmp_001225	0.4592	1263				TRUE	-0.902534	0.000820493	0.0055904	Chromosome_I	1306722	1307984	1263	+	12.3856	4684.9	3665.69	4106.21	6622.61	7000.02	4604.12	3259.39	3842.69	3934.02	9262.64	9213.92	8551.56	4781.08	5446.46	4533.36	4213.59	4034.46	4604	6117.29	6988.98	9239.12	152.846	119.948	135.7	282.482	286.576	178.434	122.876	132.211
pgaptmp_000896	pgaptmp_000896	fliI	protein_coding	protein_coding	pgaptmp_000896	0.5015	1320	GO:0044780,GO:0071973	GO:0016887		TRUE	0.606844	0.000821878	0.0055926	Chromosome_I	943967	945286	1320	+	10.7326	1570.37	1401.15	1395.15	770.652	1040.48	999.498	896.888	1053.03	1007.78	2308.6	3181.97	2991.93	4570.45	2870.3	3082.84	3239.41	3417.98	3998.07	860.009	889.472	983.645	49.0215	43.8683	44.1151	31.452	40.7571	37.063	32.3517	34.6659
pgaptmp_000960	pgaptmp_000960	pgaptmp_000960	protein_coding	protein_coding	pgaptmp_000960	0.442	405			GO:0005886,GO:0016020	TRUE	-1.08909	0.000830464	0.00563751	Chromosome_I	1013370	1013774	405	+	10.0963	732.377	903.88	867.474	1266.48	1285.58	2149.09	882.782	716.446	664.349	1015.06	903.433	785.499	924.99	873.52	804.964	1838.81	1347.48	1502.92	2206.74	1617.11	1246.17	74.514	92.2353	89.401	168.465	164.13	259.736	103.784	76.8716
pgaptmp_001523	pgaptmp_001523	pgaptmp_001523	protein_coding	protein_coding	pgaptmp_001523	0.4538	465		GO:0003677		TRUE	0.904018	0.000830622	0.00563751	Chromosome_I	1583181	1583645	465	-	9.04824	1235.79	1685.42	1786.41	826.385	663.613	997.024	1047.61	840.331	780.469	324.899	306.587	337.172	207.681	205.338	183.126	210.679	213.041	189.187	891.861	823.844	657.148	109.509	149.795	160.35	95.7401	73.7914	104.951	107.27	78.5299
pgaptmp_005164	pgaptmp_005164	pgaptmp_005164	protein_coding	protein_coding	pgaptmp_005164	0.4724	870	GO:0055085	GO:0022857	GO:0016020	TRUE	-0.817645	0.000832302	0.00564164	Chromosome_II	2130730	2131599	870	+	7.50567	65.5284	63.3684	77.5989	104.419	85.3412	89.0642	95.0345	103.735	81.6361	456.069	321.1	439.064	497.845	521.67	508.537	416.303	495.32	390.282	117.909	140.812	103.017	3.10362	3.0102	3.72287	6.46585	5.07205	5.01091	5.2011	5.18138
pgaptmp_001328	pgaptmp_001328	pgaptmp_001328	protein_coding	protein_coding	pgaptmp_001328	0.4247	405		GO:0005515,GO:0070064		TRUE	0.598722	0.00083413	0.00564675	Chromosome_I	1399453	1399857	405	+	8.48211	418.611	407.494	476.212	372.194	393.252	464.288	472.203	380.612	458.147	359.205	399.107	322.351	271.016	332.981	234.507	482.035	379.479	244.753	279.405	270.155	261.696	42.5906	41.5822	49.078	49.5083	50.2065	56.1133	55.5145	40.838
pgaptmp_003603	pgaptmp_003603	pgaptmp_003603	protein_coding	protein_coding	pgaptmp_003603	0.4561	1173				TRUE	-0.76399	0.000835522	0.0056489	Chromosome_II	353818	354990	1173	+	9.94097	524.998	503.427	522.772	907.102	1041.85	844.461	624.407	847.048	722.761	1574.04	2015.49	1891.5	1210.74	1073.31	1110.61	1542.17	1450.01	1440.74	784.569	701.51	1051.77	18.4424	17.737	18.6018	41.6603	45.925	35.2382	25.3456	31.3796
pgaptmp_004169	pgaptmp_004169	pgaptmp_004169	protein_coding	protein_coding	pgaptmp_004169	0.3599	489				TRUE	-0.837334	0.00084994	0.00573288	Chromosome_II	1009540	1010028	489	+	7.70728	184.251	234.991	229.529	377.318	294.939	347.185	389.048	349.267	396.92	153.368	88.892	96.3347	108.996	126.533	133.063	141.577	113.178	117.746	448.725	343.428	324.005	15.5259	19.8602	19.5916	41.5684	31.1866	34.7525	37.8815	31.0375
pgaptmp_004788	pgaptmp_004788	pgaptmp_004788	protein_coding	protein_coding	pgaptmp_004788	0.4702	840	GO:0055085	GO:0022857	GO:0016020	TRUE	-0.634676	0.000850123	0.00573288	Chromosome_II	1713523	1714362	840	+	9.86685	684.579	697.933	851.138	979.49	1174.98	1081.97	1145.61	1010.49	1081.68	906.084	1077.59	837.371	743.821	673.731	770.711	955.642	912.082	988.273	1023.74	1158.99	1131.52	33.5817	34.3381	42.2923	62.8182	72.3259	63.0473	64.9368	52.2744
pgaptmp_001532	pgaptmp_001532	pgaptmp_001532	protein_coding	protein_coding	pgaptmp_001532	0.4119	471				TRUE	0.763059	0.000856944	0.00576855	Chromosome_I	1590531	1591001	471	+	9.26115	1110.13	1357.14	1453.96	1332.47	1374.33	1845.61	1876.19	1737.38	1656.65	278.484	212.252	257.51	313.731	207.558	216.062	202.252	280.948	181.249	764.452	791.987	626.409	97.1204	119.082	128.846	152.405	150.874	191.801	189.666	160.292
pgaptmp_002247	pgaptmp_002247	infA	protein_coding	protein_coding	pgaptmp_002247	0.4475	219	GO:0006413	GO:0003743		TRUE	-1.28047	0.000857606	0.00576855	Chromosome_I	2434794	2435012	219	+	13.5654	4541.51	5682.03	5798.68	8272.82	9275.56	14267.6	5698.36	3330.73	3686.29	39823.3	41213.2	34649	12591.9	16798.9	15307.5	35218.9	22278.8	20765.6	17458.9	10018.7	9440.17	854.504	1072.26	1105.16	2035.04	2189.98	3188.89	1238.91	660.895
pgaptmp_000808	pgaptmp_000808	pgaptmp_000808	protein_coding	protein_coding	pgaptmp_000808	0.4484	1269				TRUE	0.654355	0.000859775	0.00577557	Chromosome_I	854021	855289	1269	-	7.37596	233.59	271.076	276.906	147.981	168.634	150.09	206.403	209.71	199.868	102.918	119.732	127.829	162.021	194.239	169.952	119.666	111.846	158.759	170.437	150.369	142.894	7.5849	8.82818	9.10775	6.28214	6.87113	5.78925	7.74439	7.18116
pgaptmp_004121	pgaptmp_004121	pgaptmp_004121	protein_coding	protein_coding	pgaptmp_004121	0.4182	648				TRUE	-0.875925	0.000860845	0.00577557	Chromosome_II	933794	934441	648	-	5.27744	34.6915	28.1637	26.1386	48.0456	65.542	59.3761	48.2597	29.8519	45.7444	22.198	27.2118	35.1992	39.7687	21.0888	22.3967	37.0796	42.6082	34.3977	64.822	59.2556	49.0161	2.20601	1.79621	1.68364	3.99432	5.22984	4.48508	3.54603	2.00186
pgaptmp_001873	pgaptmp_001873	pgaptmp_001873	protein_coding	protein_coding	pgaptmp_001873	0.4693	978		GO:0000166,GO:0016491		TRUE	0.697891	0.000864753	0.00578445	Chromosome_I	2008010	2008987	978	-	7.51102	264.427	299.24	307.945	190.261	175.461	164.109	268.77	272.399	254.057	98.8822	121.546	151.912	173.804	163.161	196.301	128.093	127.825	140.237	138.585	182.227	183.603	11.141	12.6451	13.1424	10.4803	9.27656	8.21347	13.085	12.1033
pgaptmp_001721	pgaptmp_001721	pgaptmp_001721	protein_coding	protein_coding	pgaptmp_001721	0.4898	2856				TRUE	1.834	0.000864805	0.00578445	Chromosome_I	1816223	1819078	2856	-	11.5161	7019.25	3890.12	3419.25	1425.99	2370.44	1147.11	1709.88	4538.24	3938.24	10168.7	10552.7	10276.3	3872.29	4085.68	4003.74	1496.67	1824.16	1651.09	903.596	1014.35	1960.64	101.272	56.2919	49.9705	26.8982	42.9155	19.6599	28.5062	69.0504
pgaptmp_005298	pgaptmp_005298	pgaptmp_005298	protein_coding	protein_coding	pgaptmp_005298	0.4801	1179				TRUE	-0.654259	0.000865468	0.00578445	Chromosome_II	2283744	2284922	1179	-	8.02695	233.59	227.07	206.658	351.053	392.569	253.173	309.605	323.893	356.102	219.962	210.438	179.701	251.868	318.552	263.491	193.825	153.123	186.541	302.316	367.64	344.774	8.1639	7.95954	7.3161	16.0407	17.2166	10.5108	12.5034	11.9378
pgaptmp_004339	pgaptmp_004339	pgaptmp_004339	protein_coding	protein_coding	pgaptmp_004339	0.4558	702				TRUE	-0.592828	0.000867015	0.00578743	Chromosome_II	1197581	1198282	702	+	7.61469	164.207	177.784	156.832	331.835	215.742	221.011	302.923	285.832	336.397	155.386	154.2	129.681	179.695	227.537	209.475	91.0135	141.14	119.069	237.494	251.677	238.434	9.63855	10.4664	9.32475	25.4653	15.8907	15.4103	20.546	17.6934
pgaptmp_003418	pgaptmp_003418	pgaptmp_003418	protein_coding	protein_coding	pgaptmp_003418	0.449	813	GO:0006355	GO:0003700,GO:0043565		TRUE	-0.799757	0.000871314	0.00580876	Chromosome_II	164824	165636	813	+	10.1926	1032.27	1177.6	1572.4	1956.42	1360	1586.66	2406.3	2063.51	2049.35	641.725	696.623	718.805	465.441	617.125	663.997	856.201	864.147	784.533	2056.98	2189.27	2022.95	52.319	59.8615	80.726	129.639	86.4951	95.5271	140.927	110.295
pgaptmp_000672	pgaptmp_000672	secG	protein_coding	protein_coding	pgaptmp_000672	0.4513	339	GO:0015739	GO:0015136	GO:0016020	TRUE	-0.781299	0.000878778	0.0058511	Chromosome_I	697305	697643	339	+	14.6769	11297.9	12005.7	12642.1	15525.1	15698.7	20168.1	10164.2	9472.01	9730.88	67919.9	72544.9	73627.5	49735.9	46261	48892	71774.3	62506.2	56708.6	22766.5	18193.4	17813.6	1373.27	1463.62	1556.54	2467.18	2394.46	2912.04	1427.6	1214.17
pgaptmp_004336	pgaptmp_004336	pgaptmp_004336	protein_coding	protein_coding	pgaptmp_004336	0.4312	1911				TRUE	-0.632076	0.000880177	0.00585301	Chromosome_II	1193568	1195478	1911	-	7.40575	164.207	158.421	142.129	304.289	286.746	215.239	256.148	232.099	287.134	96.8642	99.7767	127.829	100.158	125.423	109.349	158.431	147.797	96.5782	246.435	223.005	229.296	3.54069	3.42605	3.10429	8.57808	7.75856	5.51305	6.38209	5.27776
pgaptmp_001483	pgaptmp_001483	pgaptmp_001483	protein_coding	protein_coding	pgaptmp_001483	0.481	1212	GO:0055085	GO:0022857	GO:0005886,GO:0016020	TRUE	0.617543	0.000881319	0.00585321	Chromosome_I	1532928	1534139	1212	-	7.88789	286.783	307.161	347.97	224.854	237.59	256.472	296.24	261.951	244.205	207.854	268.49	205.638	297.529	286.364	288.522	165.173	169.101	150.821	196.142	198.793	181.11	9.75011	10.4738	11.9834	9.99451	10.1361	10.3579	11.6379	9.39191
pgaptmp_002727	pgaptmp_002727	pgaptmp_002727	protein_coding	protein_coding	pgaptmp_002727	0.4353	255				TRUE	1.03665	0.000883741	0.00586189	Chromosome_I	2954241	2954495	255	+	10.3747	2690.52	2172.13	1882.8	707.872	817.91	401.614	675.636	734.357	884.626	2566.9	2343.85	2376.87	1405.16	1941.28	1914.26	1857.35	1705.66	1308.44	841.568	950.639	1357.5	434.765	352.036	308.18	149.547	165.848	77.0905	126.155	125.142
pgaptmp_003378	pgaptmp_003378	rodA	protein_coding	protein_coding	pgaptmp_003378	0.4783	1083	GO:0008360		GO:0016020	TRUE	-0.841594	0.000888844	0.00588831	Chromosome_II	114363	115445	1083	+	7.93876	111.784	161.942	140.495	231.26	271.726	349.659	238.329	207.471	192.83	258.304	364.638	318.646	259.233	268.605	289.84	321.918	312.904	317.517	246.994	266.969	206.034	4.25313	6.17976	5.41468	11.5037	12.9732	15.8034	10.4781	8.32465
pgaptmp_003190	pgaptmp_003190	pgaptmp_003190	protein_coding	protein_coding		0.5	1000				TRUE	-1.4886	0.000892347	0.00590408	pgaptmp_003190	1	1000	1000	+	13.6493	3907.04	4623.25	5749.67	10098.6	11043.8	18769.5	4866.81	4727.8	4088.14	31789.6	37712	39324.9	24887.8	14284.9	16852.9	33037.9	26241.3	22436.6	17661.2	12402.3	7830.12	160.993	191.069	239.985	544.031	571.036	918.723	231.727	205.445
pgaptmp_005287	pgaptmp_005287	pgaptmp_005287	protein_coding	protein_coding	pgaptmp_005287	0.4795	1026	GO:0055085	GO:0022857	GO:0016020	TRUE	-0.837459	0.000897667	0.00592959	Chromosome_II	2272075	2273100	1026	-	9.72261	1055.39	842.272	980.197	1077.5	1116.95	810.649	1147.1	1467.97	1616.54	807.201	1179.18	824.403	415.362	384.038	395.236	345.514	440.728	377.052	1358.47	1549.57	2037.91	42.3863	33.9271	39.8756	56.5764	56.2896	38.6739	53.2335	62.1737
pgaptmp_004932	pgaptmp_004932	pgaptmp_004932	protein_coding	protein_coding	pgaptmp_004932	0.4923	849				TRUE	-0.730967	0.000899606	0.00592959	Chromosome_II	1863549	1864397	849	+	7.13403	80.9469	65.1286	71.8811	148.621	170	129.473	83.1552	105.228	107.675	167.494	165.085	164.881	237.139	246.406	231.872	185.398	221.03	210.355	108.409	114.051	138.741	3.92872	3.17034	3.53385	9.43056	10.3534	7.46456	4.66353	5.38593
pgaptmp_002888	pgaptmp_002888	pgaptmp_002888	protein_coding	protein_coding		0.5	1000				TRUE	1.05961	0.000899856	0.00592959	pgaptmp_002888	1	1000	1000	+	9.65862	4136	4847.68	6693.11	3945.51	3586.38	4765.76	3592.01	3632.98	3433.64	193.728	38.0966	116.713	98.6852	120.983	106.714	128.093	129.156	109.808	2433.06	2763.35	1912.46	170.427	200.344	279.363	212.553	185.439	233.273	171.029	157.87
pgaptmp_003604	pgaptmp_003604	pgaptmp_003604	protein_coding	protein_coding	pgaptmp_003604	0.4586	846				TRUE	-0.758058	0.000900711	0.00592959	Chromosome_II	355203	356048	846	+	8.83105	210.462	270.196	320.198	448.426	466.987	630.047	500.416	490.318	468	450.015	526.095	414.98	509.628	472.833	482.188	591.588	640.454	657.526	425.255	447.922	427.852	10.2509	13.1993	15.7975	28.5552	28.5416	36.4532	28.164	25.1852
pgaptmp_002526	pgaptmp_002526	ispE	protein_coding	protein_coding	pgaptmp_002526	0.4559	873	GO:0016114	GO:0050515		TRUE	-0.798325	0.000904031	0.00593813	Chromosome_I	2746096	2746968	873	+	11.8254	4436.66	4369.78	3963.26	4939.09	5138.22	4011.19	3180.69	3458.34	3344.27	3664.69	3176.53	2925.24	2698.38	3853.7	3309.44	1589.37	1665.71	1853.51	8217.3	5745.88	7251.89	209.411	206.865	189.487	304.787	304.328	224.901	173.476	172.144
pgaptmp_003940	pgaptmp_003940	pgaptmp_003940	protein_coding	protein_coding	pgaptmp_003940	0.4653	432				TRUE	-0.962571	0.000905323	0.00593813	Chromosome_II	709724	710155	432	-	10.0694	575.879	770.102	847.054	991.662	940.118	1586.66	1553.22	1183.63	1135.87	839.489	1023.16	894.801	1035.46	917.917	985.455	1405.65	1335.5	1176.14	1585.34	1398.56	1082.51	54.9295	73.6726	81.8405	123.664	112.523	179.777	171.191	119.061
pgaptmp_002449	pgaptmp_002449	asnB	protein_coding	protein_coding	pgaptmp_002449	0.4595	1665	GO:0006529	GO:0004066		TRUE	0.571102	0.000906359	0.00593813	Chromosome_I	2666454	2668118	1665	+	10.9381	2720.59	2841.9	2706.98	2213.3	2218.19	2252.17	2046.95	2369.5	2289.33	1515.52	1627.27	1543.21	1646.72	1844.71	1698.2	1739.37	1766.91	1629.92	1614.96	1861.77	1824.4	67.3297	70.5401	67.8596	71.6128	68.8855	66.2094	58.5365	61.8414
pgaptmp_003488	pgaptmp_003488	pgaptmp_003488	protein_coding	protein_coding	pgaptmp_003488	0.444	696				TRUE	-1.00448	0.000906524	0.00593813	Chromosome_II	235507	236202	696	-	9.52573	429.404	510.468	557.895	873.149	703.894	1366.48	1102.55	786.598	779.062	791.057	584.147	661.375	481.643	518.34	523.029	952.271	797.572	930.061	1218.76	909.861	739.395	25.4223	30.311	33.4568	67.584	52.2928	96.1005	75.4261	49.1113
pgaptmp_003080	pgaptmp_003080	pgaptmp_003080	protein_coding	protein_coding	pgaptmp_003080	0.4703	1044				TRUE	0.574644	0.000911152	0.00595551	Chromosome_I	3330770	3331813	1044	-	8.74479	477.201	494.626	490.915	323.507	351.606	339.763	450.672	463.451	446.887	341.043	397.293	377.929	764.442	582.717	501.95	451.697	575.211	494.798	279.964	328.136	321.512	18.8347	19.5802	19.6267	16.6935	17.414	15.9297	20.5538	19.2904
pgaptmp_003179	pgaptmp_003179	pgaptmp_003179	protein_coding	protein_coding	pgaptmp_003179	0.466	573				TRUE	0.665848	0.000911441	0.00595551	Chromosome_I	3446394	3446966	573	+	8.50134	534.249	448.86	559.529	331.195	374.818	315.023	345.243	371.656	379.326	326.917	324.728	296.415	316.676	326.321	371.522	355.627	383.474	432.617	312.934	315.393	289.943	38.4191	32.3741	40.7576	31.1382	33.8229	26.9105	28.6882	28.1854
pgaptmp_004280	pgaptmp_004280	pgaptmp_004280	protein_coding	protein_coding	pgaptmp_004280	0.4061	495				TRUE	0.684098	0.000920945	0.00601014	Chromosome_II	1131818	1132312	495	+	6.81395	202.753	225.31	258.119	157.59	179.558	177.304	206.403	173.887	218.165	60.5401	54.4236	55.5777	30.9312	52.167	47.4283	64.0465	73.2328	134.945	145.291	130.617	121.294	16.8779	18.8112	21.7648	17.1509	18.7561	17.5326	19.8538	15.2651
pgaptmp_003676	pgaptmp_003676	pgaptmp_003676	protein_coding	protein_coding	pgaptmp_003676	0.5168	2376	GO:0006508	GO:0008236		TRUE	-0.632309	0.000925525	0.00602894	Chromosome_II	432011	434386	2376	+	7.1023	92.5107	95.0526	86.5841	136.45	134.498	139.369	152.946	168.663	163.272	125.116	168.713	201.932	164.966	157.611	169.952	91.0135	109.183	165.374	141.938	144.635	129.602	1.60437	1.65333	1.52101	3.09379	2.92693	2.87113	3.06496	3.08469
pgaptmp_001601	pgaptmp_001601	pgaptmp_001601	protein_coding	protein_coding	pgaptmp_001601	0.3968	252				TRUE	0.666272	0.000927721	0.00602894	Chromosome_I	1669604	1669855	252	+	8.29117	393.942	505.187	526.039	511.846	329.076	474.184	600.648	373.895	446.184	302.701	257.605	135.239	147.291	164.271	114.618	552.823	387.468	205.063	278.287	294.367	272.496	64.4154	82.8502	87.1281	109.422	67.521	92.1042	113.489	64.4743
pgaptmp_001812	pgaptmp_001812	icmH	protein_coding	protein_coding	pgaptmp_001812	0.4737	1254				TRUE	0.753384	0.000928199	0.00602894	Chromosome_I	1937288	1938541	1254	+	5.10214	57.0483	55.4474	47.3762	41.6396	32.771	12.37	50.4871	39.5538	38.003	26.234	41.7248	40.757	23.5666	29.9683	15.8094	37.0796	43.9397	29.1058	23.47	28.0349	30.7389	1.87458	1.82736	1.5769	1.78885	1.35125	0.482843	1.91697	1.37065
pgaptmp_004821	pgaptmp_004821	pgaptmp_004821	protein_coding	protein_coding	pgaptmp_004821	0.4591	342				TRUE	-0.836564	0.000929522	0.00602894	Chromosome_II	1749661	1750002	342	+	8.66063	319.162	399.573	414.133	529.143	440.36	583.865	631.831	462.705	479.964	272.43	362.824	281.594	164.966	268.605	241.094	448.326	388.8	390.282	777.864	599.565	558.285	38.4542	48.2849	50.5423	83.351	66.5773	83.564	87.9646	58.7916
pgaptmp_001649	pgaptmp_001649	pgaptmp_001649	protein_coding	protein_coding	pgaptmp_001649	0.432	3162	GO:0000160			TRUE	0.872042	0.000929557	0.00602894	Chromosome_I	1721679	1724840	3162	-	7.20867	229.735	278.117	311.213	177.449	167.269	180.602	175.962	179.111	171.717	115.026	74.379	113.008	113.414	97.6744	101.444	144.947	133.151	104.516	166.525	132.529	114.648	2.9938	3.63502	4.10805	3.02326	2.73525	2.79573	2.64966	2.4615
pgaptmp_002110	pgaptmp_002110	pgaptmp_002110	protein_coding	protein_coding	pgaptmp_002110	0.5009	3162		GO:0015562		TRUE	0.732292	0.00093901	0.00608275	Chromosome_I	2290727	2293888	3162	-	12.9934	6836.54	5304.46	5918.76	2869.93	3563.16	3945.21	4479.99	5762.91	5391.5	15423.6	19993.4	17210.6	25366.5	16604.6	17588	15015.5	17698.4	26507.4	3535.59	3105.5	3748.49	89.0908	69.33	78.1285	48.896	58.2664	61.0719	67.4602	79.1986
pgaptmp_001537	pgaptmp_001537	pgaptmp_001537	protein_coding	protein_coding	pgaptmp_001537	0.4317	366				TRUE	0.562538	0.000962192	0.00622463	Chromosome_I	1593613	1593978	366	-	7.5173	373.898	385.491	419.034	324.789	217.791	286.985	373.456	235.084	301.209	84.7561	92.5202	68.5459	78.0644	84.3552	96.1741	165.173	111.846	89.9633	236.936	264.42	251.727	42.0949	43.5286	47.787	47.8062	30.7682	38.3805	48.5838	27.9112
pgaptmp_003623	pgaptmp_003623	pgaptmp_003623	protein_coding	protein_coding	pgaptmp_003623	0.4504	615	GO:0006355	GO:0003677,GO:0003700		TRUE	-0.983563	0.000964175	0.00622463	Chromosome_II	373571	374185	615	-	10.6957	1016.85	1322.82	1458.86	1741.17	1683.61	2481.43	2375.86	1749.32	1767.84	1285.47	1799.61	1448.73	1067.86	1102.17	1102.71	2049.49	2228.94	1518.79	2930.4	2308.42	1895.84	68.1301	88.8926	99.0101	152.522	141.55	197.496	183.941	123.604
pgaptmp_000242	pgaptmp_000242	pgaptmp_000242	protein_coding	protein_coding		0.5	1000				TRUE	-0.972109	0.000964463	0.00622463	pgaptmp_000242	1	1000	1000	+	11.0201	634.469	713.775	874.009	805.245	1078.03	1540.48	651.878	641.07	547.525	6879.37	7252.86	8657.16	6022.74	3943.6	4669.06	7882.78	6709.46	5889.95	1771.99	1190.85	1193.83	26.1438	29.4987	36.4802	43.3803	55.741	75.4031	31.0384	27.8575
pgaptmp_001057	pgaptmp_001057	pgaptmp_001057	protein_coding	protein_coding	pgaptmp_001057	0.4384	609		GO:0046872		TRUE	-0.762196	0.00096635	0.00622917	Chromosome_I	1123135	1123743	609	+	11.0742	1289.75	1578.05	1623.86	1739.89	1511.56	2969.63	1611.87	1294.83	1280.84	2690	2987.86	3073.45	2137.2	1973.47	2189.61	4109.09	3728.22	3024.35	2824.23	2292.49	2130.95	87.2665	107.089	111.294	153.911	128.337	238.681	126.022	92.3915
pgaptmp_004082	pgaptmp_004082	pgaptmp_004082	protein_coding	protein_coding	pgaptmp_004082	0.4167	216				TRUE	-1.08321	0.000968204	0.00623348	Chromosome_II	870882	871097	216	+	9.36171	397.025	537.751	500.717	771.933	891.645	1254.32	804.081	621.666	658.015	583.203	566.006	628.028	584.747	445.084	571.775	552.823	600.509	563.593	1215.97	987.594	697.856	75.7395	102.889	96.7564	192.526	213.443	284.242	177.247	125.066
pgaptmp_001443	pgaptmp_001443	pgaptmp_001443	protein_coding	protein_coding	pgaptmp_001443	0.4458	738	GO:0042953,GO:0044874		GO:0009279	TRUE	0.809358	0.000972751	0.00625055	Chromosome_I	1495389	1496126	738	+	6.35283	121.806	108.254	106.188	67.9045	79.8793	51.9541	74.2457	86.5705	110.49	50.4501	56.2378	68.5459	141.4	116.543	89.5869	85.9572	90.5424	92.6092	45.2636	62.4414	67.2933	6.80095	6.06221	6.00565	4.95686	5.59657	3.44585	4.79014	5.09743
pgaptmp_001772	pgaptmp_001772	pgaptmp_001772	protein_coding	protein_coding	pgaptmp_001772	0.4546	1113		GO:0016757		TRUE	0.737091	0.000973231	0.00625055	Chromosome_I	1871060	1872172	1113	+	5.41775	67.0703	66.8889	64.5296	46.1238	55.3011	32.9867	33.4106	30.5982	35.8917	40.3601	25.3977	40.757	44.1874	43.2875	50.0632	48.8776	47.9342	30.4287	39.6755	28.6721	36.5544	2.48309	2.48371	2.41994	2.23251	2.56911	1.4507	1.42929	1.19464
pgaptmp_000738	pgaptmp_000738	pgaptmp_000738	protein_coding	protein_coding	pgaptmp_000738	0.4675	999				TRUE	0.743532	0.000975261	0.00625499	Chromosome_I	772046	773044	999	-	9.52638	1373.01	1371.22	1146.83	779.621	677.268	500.574	779.58	902.274	897.293	569.077	593.218	618.765	645.136	697.04	698.251	546.081	528.608	605.929	621.956	723.811	870.659	56.6327	56.7262	47.9154	42.0419	35.0541	24.5265	37.1559	39.2474
pgaptmp_004764	pgaptmp_004764	tal	protein_coding	protein_coding	pgaptmp_004764	0.4511	951	GO:0006098	GO:0004801	GO:0005737	TRUE	-0.655103	0.000977068	0.00625499	Chromosome_II	1687038	1687988	951	+	13.5064	9375.19	9875.79	9598.58	9813.48	9745.96	9714.6	11854.8	11513.1	11484.7	10362.4	10592.7	10263.4	8133.43	9691.96	9490.94	18672.9	15892.9	24914.5	15177.8	12782	15396.9	406.217	429.174	421.277	555.913	529.893	500.008	593.536	526.079
pgaptmp_001204	pgaptmp_001204	pgaptmp_001204	protein_coding	protein_coding	pgaptmp_001204	0.4697	1254	GO:0006596	GO:0102143,GO:0102144		TRUE	0.864599	0.00097749	0.00625499	Chromosome_I	1282978	1284231	1254	+	11.1575	3210.12	2327.91	2441.51	1173.59	1390.72	1070.42	1593.31	2268.75	2199.25	4572.8	5409.71	5639.29	2936.99	3054.54	3190.87	2101.74	2374.08	2512.36	1213.74	1334.21	1645.78	105.483	76.7203	81.2646	50.4179	57.3437	41.782	60.4974	78.6187
pgaptmp_000475	pgaptmp_000475	pgaptmp_000475	protein_coding	protein_coding		0.5	1000				TRUE	-1.33127	0.000982546	0.00627401	pgaptmp_000475	1	1000	1000	+	13.4242	3774.44	4734.15	5840.34	9576.46	7886.89	14105.1	4891.31	4335.24	3544.13	33107.4	28053.6	32663	14182.7	13364.7	13936	28797.4	18654.4	15366.5	14576.6	12103.4	7460.42	155.529	195.652	243.769	515.904	407.802	690.415	232.894	188.387
pgaptmp_004148	pgaptmp_004148	pgaptmp_004148	protein_coding	protein_coding	pgaptmp_004148	0.447	1320				TRUE	-0.749411	0.000982848	0.00627401	Chromosome_II	983586	984905	1320	+	5.67426	32.3788	45.7661	46.5594	60.2172	64.1766	70.0968	83.8977	66.4205	80.9323	36.3241	32.6542	27.7889	51.552	62.1564	39.5236	37.0796	30.6246	33.0747	66.4984	72.6359	74.7703	1.01075	1.43289	1.47222	2.4576	2.51389	2.5993	3.02628	2.18658
pgaptmp_001112	pgaptmp_001112	pgaptmp_001112	protein_coding	protein_coding	pgaptmp_001112	0.4535	333				TRUE	0.573662	0.000985142	0.00628102	Chromosome_I	1184583	1184915	333	-	8.10233	1751.54	1749.67	1758.64	1131.96	933.974	987.953	1775.96	1563.49	1601.76	38.3421	39.9107	35.1992	30.9312	32.1882	44.7934	33.7087	17.3096	25.1368	1022.62	1073.61	1273.59	216.737	217.147	220.431	183.126	145.022	145.219	253.934	204.028
pgaptmp_001088	pgaptmp_001088	pgaptmp_001088	protein_coding	protein_coding	pgaptmp_001088	0.4545	99				TRUE	0.718153	0.000986635	0.00628293	Chromosome_I	1157219	1157317	99	-	6.31214	137.224	160.181	156.015	83.2791	97.6303	103.908	63.8513	54.4797	71.0797	82.7381	47.1672	72.251	61.8624	59.9366	50.0632	70.7883	81.2219	47.6276	98.9094	74.5474	79.755	57.1155	66.868	65.7766	45.3174	50.991	51.3745	30.7091	23.9132
pgaptmp_002889	pgaptmp_002889	pgaptmp_002889	protein_coding	protein_coding	pgaptmp_002889	0.4249	273				TRUE	0.931087	0.000993191	0.00630751	Chromosome_I	3141035	3141307	273	-	11.1075	10681.9	14706.8	15272.3	9550.19	9913.91	11468.7	12342.6	10059.3	10011.7	300.683	344.683	314.94	279.854	257.505	227.92	350.571	356.844	247.399	7533.32	7094.11	5567.9	1612.29	2226.36	2334.98	1884.58	1877.7	2056.28	2152.67	1601.2
pgaptmp_004998	pgaptmp_004998	pgaptmp_004998	protein_coding	protein_coding	pgaptmp_004998	0.452	1719				TRUE	-0.638579	0.000993438	0.00630751	Chromosome_II	1950786	1952504	1719	-	6.04467	53.1937	51.0468	51.4603	56.3736	75.1002	56.9021	64.5938	61.1964	64.0421	70.6301	56.2378	85.2192	75.1186	78.8055	76.4123	57.3048	53.2602	55.5655	74.8806	77.7332	91.386	1.27509	1.22725	1.2495	1.7667	2.25896	1.62026	1.78915	1.54699
pgaptmp_001297	pgaptmp_001297	pgaptmp_001297	protein_coding	protein_coding	pgaptmp_001297	0.398	294				TRUE	0.719388	0.000994092	0.00630751	Chromosome_I	1380602	1380895	294	+	6.9767	198.898	219.149	243.416	169.121	159.076	185.55	195.266	158.215	185.089	96.8642	87.0778	66.6933	81.0103	78.8055	56.6505	101.126	105.189	85.9943	139.703	125.52	107.171	27.8767	30.8059	34.5575	30.9894	27.977	30.8921	31.6237	23.385
pgaptmp_002433	pgaptmp_002433	pgaptmp_002433	protein_coding	protein_coding	pgaptmp_002433	0.4705	1290		GO:0046912		TRUE	0.659625	0.000997721	0.00632201	Chromosome_I	2648710	2649999	1290	+	11.0959	3085.23	3266.99	2858.09	2589.34	2838.79	1946.22	2565.19	3129.23	3097.95	1384.35	1652.66	1378.33	1727.73	1866.91	1758.8	2389.95	2027.88	2484.57	1596.52	2021.7	1937.38	98.55	104.665	92.4756	108.134	113.786	73.8473	94.6809	105.411
pgaptmp_002702	pgaptmp_002702	tgt	protein_coding	protein_coding	pgaptmp_002702	0.46	1137	GO:0006400	GO:0008479	GO:0005737	TRUE	0.762784	0.000998781	0.00632201	Chromosome_I	2924643	2925779	1137	-	12.9052	8796.23	8156.04	6976.55	4373.43	5354.65	3326.71	5137.8	7759.26	7791.32	11327.1	11917	13220.1	13007.3	10090.4	11955.9	10608.1	10443	11367.1	3913.35	4401.48	5177.43	318.782	296.456	256.107	207.217	243.509	143.215	215.154	296.55
pgaptmp_001469	pgaptmp_001469	cobU	protein_coding	protein_coding	pgaptmp_001469	0.51	549	GO:0009236	GO:0000166,GO:0043752		TRUE	0.602246	0.00100085	0.00632747	Chromosome_I	1520466	1521014	549	+	7.03135	108.7	110.895	113.539	55.7329	83.9757	78.3435	73.5033	86.5705	84.4511	191.71	295.702	257.51	397.687	230.867	255.586	182.027	201.057	227.554	69.2925	60.5299	72.278	8.1586	8.34796	8.63208	5.46895	7.90907	6.98495	6.37481	6.85228
pgaptmp_004651	pgaptmp_004651	pgaptmp_004651	protein_coding	protein_coding	pgaptmp_004651	0.4013	912	GO:0055085	GO:0022857	GO:0016020	TRUE	-0.736899	0.00101014	0.00637341	Chromosome_II	1561332	1562243	912	-	5.89144	38.5461	39.6053	36.7574	62.139	57.3493	80.8175	61.624	51.4946	57.0045	62.5581	59.866	61.1355	69.2269	46.6173	55.3331	94.3844	55.9232	70.1184	75.9982	57.9813	62.3086	1.74158	1.79473	1.68225	3.67057	3.25145	4.33754	3.21727	2.4536
pgaptmp_003503	pgaptmp_003503	pgaptmp_003503	protein_coding	protein_coding	pgaptmp_003503	0.4228	984				TRUE	-0.564225	0.00101099	0.00637341	Chromosome_II	253159	254142	984	+	7.47202	155.726	141.699	158.465	203.073	199.357	197.92	181.16	176.873	192.83	110.99	125.174	131.534	184.114	159.831	150.19	190.454	175.759	314.871	212.907	214.722	225.973	6.52117	5.95131	6.72171	11.1179	10.4756	9.84529	8.76595	7.81093
pgaptmp_004830	pgaptmp_004830	pgaptmp_004830	protein_coding	protein_coding	pgaptmp_004830	0.4521	867	GO:0006355	GO:0003677,GO:0003700		TRUE	-0.65895	0.00101175	0.00637341	Chromosome_II	1757127	1757993	867	-	7.34231	119.493	130.257	124.158	168.48	180.241	126.999	204.918	179.858	204.794	163.458	204.996	203.785	163.493	178.7	230.554	126.408	103.857	96.5782	160.937	198.793	216.834	5.67913	6.20904	5.9772	10.4687	10.7492	7.16991	11.2537	9.01462
pgaptmp_002005	pgaptmp_002005	pgaptmp_002005	protein_coding	protein_coding	pgaptmp_002005	0.473	888	GO:0055085		GO:0016020	TRUE	0.600709	0.00102324	0.00643308	Chromosome_I	2171794	2172681	888	+	10.5093	2110.02	1944.18	2098.44	1299.15	1444.66	1085.26	1625.24	1615.73	1686.21	1428.75	1681.69	1485.78	1757.19	1798.1	1914.26	758.446	971.999	1027.96	1138.3	1295.34	1435.59	97.9109	90.4825	98.6334	78.8156	84.1192	59.8212	87.1439	79.0669
pgaptmp_001980	pgaptmp_001980	pgaptmp_001980	protein_coding	protein_coding	pgaptmp_001980	0.4819	1710				TRUE	0.621426	0.00102367	0.00643308	Chromosome_I	2141224	2142933	1710	+	9.2104	787.112	866.915	928.737	488.144	589.195	597.885	822.643	819.435	745.281	357.187	458.973	463.148	493.426	447.304	503.267	594.959	532.602	750.135	486.724	588.733	514.254	18.967	20.9518	22.6693	15.3786	17.8159	17.1141	22.9059	20.8236
pgaptmp_003746	pgaptmp_003746	pgaptmp_003746	protein_coding	protein_coding	pgaptmp_003746	0.4485	1068	GO:0006355	GO:0003700,GO:0043565		TRUE	-0.687428	0.00102554	0.00643717	Chromosome_II	501859	502926	1068	+	6.53205	75.5504	101.213	85.7672	126.2	154.297	135.246	147.749	129.11	148.493	56.5041	78.0072	55.5777	61.8624	65.4862	57.968	65.732	61.2493	51.5966	141.379	143.36	129.602	2.9149	3.91659	3.3519	6.36578	7.47016	6.19847	6.58698	5.25321
pgaptmp_001608	pgaptmp_001608	pgaptmp_001608	protein_coding	protein_coding	pgaptmp_001608	0.4611	1620				TRUE	0.759461	0.001028	0.00644493	Chromosome_I	1678272	1679891	1620	+	7.69765	311.453	358.208	316.114	263.29	253.293	290.283	308.862	329.864	292.06	115.026	130.617	124.124	113.414	92.1247	84.317	257.872	256.981	317.517	147.526	213.448	185.264	7.92201	9.13821	8.14459	8.75556	8.08447	8.77081	9.07784	8.84824
pgaptmp_005042	pgaptmp_005042	pgaptmp_005042	protein_coding	protein_coding	pgaptmp_005042	0.4653	1629			GO:0098561	TRUE	-0.696761	0.00103158	0.00644721	Chromosome_II	2000957	2002585	1629	-	12.0862	3223.23	3521.35	3660.22	3692.47	3108.47	3339.08	2958.69	3072.51	2890.34	7956.99	8401.2	9149.95	3988.65	4952.54	4828.47	4397.3	4388.64	3562.81	6222.91	4847.49	4985.52	81.532	89.3366	93.7836	122.112	98.6664	100.332	86.4792	81.9614
pgaptmp_004638	pgaptmp_004638	pgaptmp_004638	protein_coding	protein_coding	pgaptmp_004638	0.4384	828	GO:0006817	GO:0042626,GO:0140359	GO:0055052	TRUE	-0.936183	0.00103166	0.00644721	Chromosome_II	1548191	1549018	828	+	6.52209	53.9646	48.4064	43.292	98.6537	101.044	128.648	72.0184	62.689	48.5594	165.476	108.847	138.944	113.414	107.664	115.936	111.239	130.488	100.547	109.527	101.945	72.278	2.68557	2.4161	2.18232	6.4187	6.30992	7.60513	4.14139	3.29002
pgaptmp_005003	pgaptmp_005003	pgaptmp_005003	protein_coding	protein_coding	pgaptmp_005003	0.4544	1917			GO:0098561	TRUE	-0.601385	0.00103204	0.00644721	Chromosome_II	1955344	1957260	1917	-	12.3161	3749.77	4251.84	3870.96	5417.63	5906.97	4511.76	5142.26	6230.84	5752.53	7848.02	9360.87	8245.88	3287.54	3239.9	3314.71	5175.97	4375.33	4834.2	5699.86	5164.16	6338.03	80.601	91.6636	84.2825	152.248	159.326	115.201	127.722	141.241
pgaptmp_004305	pgaptmp_004305	pgaptmp_004305	protein_coding	protein_coding	pgaptmp_004305	0.4121	597	GO:0006633	GO:0008770		TRUE	-0.624247	0.00103956	0.00648646	Chromosome_II	1162114	1162710	597	+	9.60802	790.967	1006.85	1015.32	1614.97	1152.45	1385.44	1783.38	1279.15	1454.67	296.647	232.208	231.574	306.366	417.336	424.22	773.615	631.134	693.246	1442.85	1345.68	1345.04	54.5936	69.7001	70.9855	145.732	99.8138	113.592	142.234	93.1078
pgaptmp_004374	pgaptmp_004374	pgaptmp_004374	protein_coding	protein_coding	pgaptmp_004374	0.4132	438				TRUE	-1.0613	0.00104643	0.0065216	Chromosome_II	1239427	1239864	438	+	12.2529	1905.72	2430.88	2690.64	3546.41	3057.26	6068.74	4209.73	2797.87	2793.93	8465.52	8301.42	9529.73	4731	4804.91	6178.86	13862.7	11312.5	7714.35	5961.95	4397.02	3549.93	179.285	229.367	256.403	436.193	360.913	678.199	457.629	277.582
pgaptmp_004833	pgaptmp_004833	pgaptmp_004833	protein_coding	protein_coding	pgaptmp_004833	0.4374	1095			GO:0005886	TRUE	-0.902378	0.00105157	0.00654584	Chromosome_II	1759053	1760147	1095	-	7.50766	96.3653	110.015	147.03	224.213	178.875	235.855	250.208	188.067	168.902	223.998	221.323	257.51	139.927	172.04	169.952	165.173	149.129	175.958	239.73	225.554	178.618	3.62631	4.1522	5.60443	11.0309	8.44656	10.543	10.8798	7.46339
pgaptmp_004863	pgaptmp_004863	pgaptmp_004863	protein_coding	protein_coding	pgaptmp_004863	0.5	630		GO:0016830,GO:0016832,GO:0016833		TRUE	-0.721169	0.00105573	0.00656398	Chromosome_II	1789220	1789849	630	-	3.55241	4.62554	4.40058	4.90099	10.2497	11.6064	8.24669	10.3944	12.6871	16.1865	0	12.6989	18.5259	11.7833	21.0888	17.1269	23.5961	23.9671	23.8138	11.1762	10.8317	14.1233	0.302538	0.288676	0.324701	0.876469	0.952579	0.640725	0.785582	0.875101
pgaptmp_004879	pgaptmp_004879	blaCARB	protein_coding	protein_coding	pgaptmp_004879	0.4836	852		GO:0008800		TRUE	-0.613261	0.00106154	0.00659231	Chromosome_II	1812527	1813378	852	+	7.91055	192.731	203.307	225.445	370.272	335.903	371.101	312.575	346.282	273.762	145.296	136.059	159.323	179.695	165.381	197.618	235.961	233.014	267.244	269.905	330.047	317.359	9.32115	9.86176	11.0444	23.4124	20.3853	21.3199	17.4681	17.6615
pgaptmp_000753	pgaptmp_000753	pgaptmp_000753	protein_coding	protein_coding	pgaptmp_000753	0.5081	984				TRUE	1.05371	0.00106289	0.00659294	Chromosome_I	791954	792937	984	-	7.97887	432.488	351.167	264.653	174.886	227.349	136.895	221.252	308.221	306.135	232.07	304.772	270.478	299.001	359.619	345.173	234.276	276.953	316.194	124.056	161.838	188.587	18.1108	14.7489	11.2259	9.57469	11.9465	6.80966	10.706	13.6115
pgaptmp_002532	pgaptmp_002532	pgaptmp_002532	protein_coding	protein_coding		0.5	1000				TRUE	-1.13624	0.00106848	0.00661982	pgaptmp_002532	1	1000	1000	+	13.1621	2774.55	3009.12	3931.41	5939.08	5240.63	10546.7	3228.2	3002.36	2428.67	39274.4	40313.4	41664.8	18445.3	12546.7	13974.2	29151.3	20289.5	17655.3	8460.94	6967.95	4807.73	114.328	124.36	164.093	319.951	270.974	516.237	153.707	130.467
pgaptmp_003536	pgaptmp_003536	pgaptmp_003536	protein_coding	protein_coding	pgaptmp_003536	0.4878	1185	GO:0055085	GO:0022857		TRUE	-0.626856	0.0010747	0.00664446	Chromosome_II	290261	291445	1185	-	8.47834	208.92	205.067	187.871	260.087	260.803	221.011	285.846	289.564	287.838	518.627	549.679	503.905	583.274	588.266	657.409	483.72	560.564	551.686	309.581	260.597	329.82	7.26474	7.15187	6.61733	11.824	11.3799	9.12911	11.4854	10.6185
pgaptmp_003394	pgaptmp_003394	exbB	protein_coding	protein_coding	pgaptmp_003394	0.4623	861	GO:0055085	GO:0022857	GO:0016020	TRUE	-0.899915	0.00107499	0.00664446	Chromosome_II	132795	133655	861	-	5.68076	29.2951	21.1228	28.5891	48.0456	45.0601	49.4801	54.1994	64.1816	57.7083	54.4861	83.4496	38.9044	67.754	53.2769	85.6345	55.6194	59.9178	51.5966	41.9108	54.1584	64.801	1.402	1.01389	1.38592	3.00618	2.70603	2.81294	2.99726	3.23925
pgaptmp_004168	pgaptmp_004168	pgaptmp_004168	protein_coding	protein_coding	pgaptmp_004168	0.3827	567				TRUE	-0.773618	0.00108242	0.00668256	Chromosome_II	1008952	1009518	567	+	8.24699	247.466	305.401	277.722	443.301	458.111	517.067	547.933	476.884	505.299	248.214	219.509	172.291	245.977	196.459	160.729	210.679	165.107	187.864	528.634	453.019	380.498	17.9842	22.2602	20.4441	42.1192	41.7765	44.6372	46.0127	36.5483
pgaptmp_001550	pgaptmp_001550	citC	protein_coding	protein_coding	pgaptmp_001550	0.4079	1059	GO:0006101	GO:0008771		TRUE	0.729666	0.00109349	0.00674297	Chromosome_I	1608385	1609443	1059	+	4.60492	47.0263	47.5263	48.193	37.1553	22.5301	30.5127	50.4871	33.5834	55.597	12.108	12.6989	18.5259	10.3104	15.5391	7.90472	15.1689	9.32054	23.8138	25.1465	19.7519	29.0774	1.8298	1.85473	1.89946	1.89012	1.10005	1.41032	2.26995	1.37805
pgaptmp_003580	pgaptmp_003580	trmY	protein_coding	protein_coding	pgaptmp_003580	0.4567	600				TRUE	-1.11383	0.00109601	0.0067506	Chromosome_II	333742	334341	600	-	10.9032	938.213	1294.65	1479.28	2166.54	1736.86	3630.19	2174.66	1717.98	1674.24	2264.2	2133.41	2630.68	1883.86	1717.07	1947.2	1491.61	1957.31	1514.82	3294.19	2346.01	1986.4	64.433	89.1751	102.906	194.527	149.678	296.15	172.573	124.424
pgaptmp_000269	pgaptmp_000269	pgaptmp_000269	protein_coding	protein_coding	pgaptmp_000269	0.4813	588				TRUE	-0.683912	0.00110666	0.00680476	Chromosome_I	284073	284660	588	+	9.20271	431.717	503.427	560.346	593.844	576.906	814.773	354.152	325.386	323.729	865.724	908.875	855.897	608.313	702.59	685.076	524.17	505.972	492.152	864.479	681.121	751.857	30.2538	35.3835	39.7759	54.4076	50.7308	67.8253	28.6778	24.0469
pgaptmp_002095	pgaptmp_002095	pgaptmp_002095	protein_coding	protein_coding	pgaptmp_002095	0.4792	720		GO:0003677,GO:0003700		TRUE	0.652054	0.00110739	0.00680476	Chromosome_I	2271676	2272395	720	+	11.4481	6925.2	7646.46	6399.05	4571.38	4122.32	3053.75	5766.67	5830.83	6068.52	1331.88	1268.07	1456.14	1558.34	1454.02	1445.25	886.539	985.314	1099.4	3912.23	4595.18	4205.42	396.331	438.904	370.957	342.042	296.042	207.603	381.351	351.913
pgaptmp_001887	pgaptmp_001887	pgaptmp_001887	protein_coding	protein_coding	pgaptmp_001887	0.4444	1125				TRUE	0.708258	0.00110921	0.006808	Chromosome_I	2026712	2027836	1125	-	10.3176	9170.13	9874.03	10038.9	6185.08	6722.15	4931.52	10672.1	11363.1	10892.8	115.026	92.5202	101.893	110.469	115.433	89.5869	150.004	130.488	146.852	4870.03	6511.11	5558.76	335.878	362.73	372.454	296.181	308.958	214.566	451.678	438.918
pgaptmp_001218	pgaptmp_001218	nrfC	protein_coding	protein_coding	pgaptmp_001218	0.4672	687				TRUE	0.642527	0.00111144	0.0068137	Chromosome_I	1300868	1301554	687	+	7.26551	306.827	360.848	401.881	292.118	252.61	225.135	296.983	275.384	300.505	100.9	61.6801	66.6933	57.4436	105.444	92.2218	42.1359	71.9013	56.8885	206.76	231.288	205.203	18.4033	21.7075	24.4164	22.9068	19.0124	16.0405	20.5829	17.4188
pgaptmp_001759	pgaptmp_001759	pgaptmp_001759	protein_coding	protein_coding	pgaptmp_001759	0.433	321		GO:0043856		TRUE	0.824479	0.00111374	0.00681985	Chromosome_I	1855654	1855974	321	+	4.99173	54.7355	73.0497	67.797	38.4365	36.1847	51.1295	56.4268	49.2557	51.3744	10.09	12.6989	24.0837	13.2562	28.8583	19.7618	28.6524	21.3041	13.2299	32.411	24.8491	39.0467	7.02623	9.40492	8.81548	6.45065	5.82859	7.79649	8.36976	6.66789
pgaptmp_002062	pgaptmp_002062	pgaptmp_002062	protein_coding	protein_coding	pgaptmp_002062	0.4869	267		GO:0008270		TRUE	0.887232	0.00112527	0.00688249	Chromosome_I	2227213	2227479	267	-	6.29418	111.013	123.216	146.213	82.6385	76.4657	75.0448	74.2457	61.9427	68.9684	102.918	56.2378	79.6614	60.3895	55.4968	65.8727	77.53	115.841	76.7334	74.8806	61.1671	48.1853	17.1325	19.0721	22.8568	16.6738	14.8081	13.7576	13.2402	10.0813
pgaptmp_000272	pgaptmp_000272	astD	protein_coding	protein_coding	pgaptmp_000272	0.5226	1458	GO:0006527	GO:0043824		TRUE	0.944628	0.00112677	0.00688366	Chromosome_I	287390	288847	1458	+	7.4944	195.814	117.056	158.465	115.95	127.67	98.9602	115.823	195.53	114.009	199.782	297.516	183.407	407.997	317.442	378.109	306.749	468.69	474.953	79.351	67.5387	77.2627	5.53408	3.318	4.53646	4.28428	4.52769	3.32228	3.78243	5.82765
pgaptmp_005173	pgaptmp_005173	pgaptmp_005173	protein_coding	protein_coding	pgaptmp_005173	0.4189	444				TRUE	-0.686999	0.00112906	0.00688962	Chromosome_II	2140701	2141144	444	-	8.40537	286.012	331.804	298.96	384.365	416.465	556.651	644.453	570.172	604.529	207.854	259.419	200.08	231.247	206.448	210.793	289.895	272.959	256.66	483.93	523.106	407.914	26.5436	30.8845	28.1042	46.6364	48.4997	61.3667	69.11	55.8033
pgaptmp_004394	pgaptmp_004394	pgaptmp_004394	protein_coding	protein_coding	pgaptmp_004394	0.4202	633				TRUE	-0.623498	0.00113202	0.00689733	Chromosome_II	1258532	1259164	633	-	6.9124	94.8235	100.333	103.738	160.152	131.767	116.278	121.763	101.497	121.047	147.314	99.7767	111.155	88.3748	103.224	108.031	134.835	121.167	130.976	154.79	128.706	167.818	6.17263	6.55063	6.84027	13.6299	10.7633	8.99141	9.15892	6.96763
pgaptmp_002198	pgaptmp_002198	pgaptmp_002198	protein_coding	protein_coding	pgaptmp_002198	0.4737	570				TRUE	-0.60319	0.00113295	0.00689733	Chromosome_I	2382909	2383478	570	+	10.6591	1255.83	1518.2	1637.75	1752.06	1415.3	2006.42	1535.4	1202.29	1301.96	1685.03	1583.73	1674.74	1695.32	1535.04	1541.42	1179.8	1874.76	1670.94	1983.22	2148.49	2259.73	90.7853	110.077	119.926	165.592	128.386	172.298	128.257	91.658
pgaptmp_000993	pgaptmp_000993	sppA	protein_coding	protein_coding	pgaptmp_000993	0.4614	1851	GO:0006465,GO:0006508	GO:0008233	GO:0016020	TRUE	0.630978	0.00113486	0.00690093	Chromosome_I	1050600	1052450	1851	-	12.9054	13027.1	13542.4	13570	8158.15	8949.22	6896.7	10080.3	11536.3	11131.4	6510.08	6850.12	5644.84	5784.13	5799.42	5546.48	4562.47	4664.27	4432.01	7293.59	8483.11	8948.35	290	302.364	305.995	237.438	249.99	182.376	259.299	270.83
pgaptmp_001639	pgaptmp_001639	pgaptmp_001639	protein_coding	protein_coding	pgaptmp_001639	0.4118	561				TRUE	1.01613	0.00113616	0.00690093	Chromosome_I	1714842	1715402	561	+	11.016	6596.79	9666.32	10281.4	4846.84	4750.43	8892.4	10744.1	7907.03	7038.3	758.769	674.853	585.419	371.174	258.615	287.205	547.767	500.646	342.654	5023.7	3979.05	3413.68	484.538	712.099	764.949	465.437	437.839	775.87	911.885	612.474
pgaptmp_004260	pgaptmp_004260	pgaptmp_004260	protein_coding	protein_coding	pgaptmp_004260	0.4404	495				TRUE	-0.95769	0.0011403	0.00691763	Chromosome_II	1108938	1109432	495	+	8.53128	181.167	250.833	231.163	401.662	426.023	715.812	365.289	300.758	285.726	381.403	500.698	444.622	363.81	249.736	260.856	574.734	486	530.519	509.076	409.055	320.682	15.0811	20.9422	19.4919	43.7139	44.5012	70.7826	35.137	26.4028
pgaptmp_000240	pgaptmp_000240	pgaptmp_000240	protein_coding	protein_coding		0.5	1000				TRUE	-1.04116	0.00114154	0.00691763	pgaptmp_000240	1	1000	1000	+	11.2082	670.703	691.772	865.024	783.464	1234.37	1750.77	619.952	701.52	576.379	8719.79	10986.3	11267.5	7853.58	4582.93	5806.02	10282.8	8613.51	7240.72	1948.01	1248.83	1173.89	27.6368	28.5894	36.1051	42.2069	63.825	85.6963	29.5183	30.4844
pgaptmp_005083	pgaptmp_005083	manA	protein_coding	protein_coding	pgaptmp_005083	0.4596	1188	GO:0005975	GO:0004476,GO:0008270		TRUE	-0.741976	0.00114729	0.00694446	Chromosome_II	2043767	2044954	1188	-	8.25933	192.731	227.07	269.554	393.334	374.136	451.094	467.006	396.284	426.478	294.629	312.029	326.056	235.666	196.459	223.967	257.872	255.649	240.784	376.638	403.958	327.328	6.68486	7.89924	9.47045	17.8365	16.2838	18.5859	18.7171	14.4953
pgaptmp_003466	pgaptmp_003466	uxuA	protein_coding	protein_coding	pgaptmp_003466	0.479	1188	GO:0006064	GO:0008927		TRUE	-0.788627	0.00116094	0.00701901	Chromosome_II	216730	217917	1188	+	7.69736	138.766	124.096	93.9355	194.104	245.1	163.284	134.385	142.543	156.938	314.809	299.33	233.426	212.1	259.725	299.062	320.233	310.241	367.791	191.113	203.253	211.018	4.8131	4.31703	3.30031	8.80204	10.6677	6.72761	5.386	5.21395
pgaptmp_000624	pgaptmp_000624	pgaptmp_000624	protein_coding	protein_coding	pgaptmp_000624	0.4553	771		GO:0140359	GO:0016020,GO:0043190	TRUE	0.519204	0.00117001	0.00706296	Chromosome_I	631794	632564	771	+	10.2548	1494.05	1485.64	1569.95	1043.55	980.399	1091.04	1173.08	1406.03	1093.64	1119.99	1231.79	1389.44	1312.37	1187.63	1202.84	1430.93	1324.85	1357.39	953.889	1043.03	1022.69	79.8488	79.6343	84.9908	72.9161	65.7495	69.2656	72.4448	79.2458
pgaptmp_001700	pgaptmp_001700	ccoP	protein_coding	protein_coding	pgaptmp_001700	0.4841	975		GO:0004129		TRUE	0.79463	0.00117089	0.00706296	Chromosome_I	1796743	1797717	975	+	11.4405	3217.83	2576.1	2472.55	1472.12	2097.34	1129.8	1888.07	3262.07	2825.59	6267.92	6630.61	5937.55	4682.39	4389.8	3989.25	2587.14	2533.86	3692.46	1353.44	1385.18	1822.73	135.993	109.194	105.848	81.3397	111.227	56.7189	92.2032	145.387
pgaptmp_000296	pgaptmp_000296	pgaptmp_000296	protein_coding	protein_coding	pgaptmp_000296	0.3968	189				TRUE	-0.739852	0.00117429	0.00707478	Chromosome_I	309411	309599	189	+	9.17695	322.246	300.12	349.604	422.802	450.601	520.366	239.814	214.934	267.429	1061.47	1220.9	1156.02	888.167	761.416	853.71	1452.85	1231.64	1012.09	621.956	453.019	484.346	70.256	65.6258	77.2067	120.514	123.275	134.766	60.415	49.4174
pgaptmp_005305	pgaptmp_005305	pgaptmp_005305	protein_coding	protein_coding	pgaptmp_005305	0.4248	798				TRUE	-0.70636	0.00117788	0.00707478	Chromosome_II	2291229	2292026	798	-	8.76717	269.052	285.158	354.505	440.739	462.208	573.145	485.567	385.09	443.368	445.979	439.017	413.128	400.633	368.499	374.157	549.452	605.835	611.221	524.723	468.948	427.852	13.8929	14.7681	18.5421	29.7538	29.9487	35.1556	28.972	20.9699
pgaptmp_004842	pgaptmp_004842	pgaptmp_004842	protein_coding	protein_coding	pgaptmp_004842	0.4212	1047				TRUE	-0.999047	0.00117813	0.00707478	Chromosome_II	1767741	1768787	1047	+	8.47174	250.55	313.322	280.173	627.156	619.236	599.534	426.913	416.434	419.441	310.773	283.003	285.299	201.789	259.725	235.824	279.782	262.307	265.921	659.396	571.53	387.144	9.86065	12.3676	11.1692	32.2696	30.5811	28.0285	19.4145	17.2837
pgaptmp_004960	pgaptmp_004960	pgaptmp_004960	protein_coding	protein_coding	pgaptmp_004960	0.4264	387				TRUE	-0.671805	0.00117823	0.00707478	Chromosome_II	1893664	1894050	387	+	10.3057	1033.04	1184.64	1164.8	2194.08	1953.29	2236.5	1937.81	1570.21	1738.99	341.043	6313.14	342.729	3443.67	223.097	285.887	556.194	7854.55	545.071	1916.16	1733.07	1482.11	109.992	126.507	125.627	305.426	260.975	282.873	238.415	176.313
pgaptmp_001737	pgaptmp_001737	pgaptmp_001737	protein_coding	protein_coding	pgaptmp_001737	0.4857	1779	GO:0032324	GO:0005525		TRUE	0.963148	0.00118032	0.00707922	Chromosome_I	1836474	1838252	1779	+	10.7115	2842.39	2421.2	1943.24	1272.89	1585.3	992.076	1262.18	1847.83	1852.3	2246.04	2590.57	2160.12	2288.91	2285.36	2389.86	1093.85	1223.65	1346.8	1011.45	1024.55	1505.38	65.8364	56.2466	45.5923	38.546	46.0764	27.2962	33.7814	45.1361
pgaptmp_004657	pgaptmp_004657	pgaptmp_004657	protein_coding	protein_coding	pgaptmp_004657	0.4687	1293		GO:0004386,GO:0005524,GO:0016887		TRUE	-0.721748	0.00118729	0.00711291	Chromosome_II	1571099	1572391	1293	-	11.9952	2326.64	2602.51	2833.59	3436.86	3429.35	4457.33	3496.97	3466.55	3092.32	5319.46	5565.72	6652.65	4654.41	4426.43	4829.79	5826.55	5650.91	4703.23	4595.1	4103.93	3470.17	74.1464	83.183	91.47	143.195	137.138	168.737	128.774	116.503
pgaptmp_002588	pgaptmp_002588	ppnN	protein_coding	protein_coding	pgaptmp_002588	0.4946	1377				TRUE	1.29307	0.00119109	0.0071269	Chromosome_I	2797059	2798435	1377	+	11.1667	6266.83	4240.4	3692.89	2160.13	2358.83	1219.68	2316.47	4168.82	3975.54	1392.42	1271.7	1382.03	2406.74	2620.56	2586.16	1759.59	1849.46	2188.22	1286.94	1882.16	2397.64	187.531	127.267	111.937	84.5105	88.5741	43.3557	80.0986	131.558
pgaptmp_003941	pgaptmp_003941	pgaptmp_003941	protein_coding	protein_coding	pgaptmp_003941	0.4683	1215	GO:0055085	GO:0022857		TRUE	-0.877231	0.00119258	0.0071269	Chromosome_II	710343	711557	1215	-	8.84908	218.942	323.883	374.925	312.617	325.662	540.158	303.665	264.936	251.242	807.201	957.856	883.686	478.697	459.514	548.061	701.141	596.515	523.904	584.515	497.62	535.023	7.42525	11.0168	12.8798	13.8612	13.8591	21.7609	11.9001	9.47549
pgaptmp_004680	pgaptmp_004680	rbsA	protein_coding	protein_coding	pgaptmp_004680	0.4774	1506		GO:0005524		TRUE	2.08563	0.00119369	0.0071269	Chromosome_II	1593046	1594551	1506	-	7.14276	981.385	563.275	355.321	213.963	173.413	98.1356	250.951	310.46	344.138	36.3241	168.713	103.745	54.4978	63.2664	50.0632	42.1359	57.2548	107.162	82.1451	117.237	220.988	26.8517	15.4574	9.84776	7.65382	5.9539	3.18959	7.93407	8.95814
pgaptmp_001466	pgaptmp_001466	pgaptmp_001466	protein_coding	protein_coding	pgaptmp_001466	0.451	612		GO:0010181,GO:0016646		TRUE	0.580591	0.00120056	0.00714887	Chromosome_I	1517989	1518600	612	+	8.81911	639.095	617.842	604.455	388.209	425.34	389.244	449.187	453.749	479.26	347.097	408.177	426.096	463.968	445.084	437.395	451.697	456.707	527.873	347.58	409.692	424.529	43.0301	41.7222	41.2243	34.1726	35.936	31.1317	34.9469	32.2182
pgaptmp_001219	pgaptmp_001219	nrfD	protein_coding	protein_coding	pgaptmp_001219	0.4537	972				TRUE	0.644084	0.00120144	0.00714887	Chromosome_I	1301551	1302522	972	+	7.60684	359.25	364.368	343.069	271.618	281.285	272.141	376.426	329.864	380.03	86.7742	134.245	98.1873	141.4	95.4545	115.936	91.0135	122.499	127.007	183.29	240.845	219.326	15.2296	15.4923	14.7318	15.0542	14.9632	13.7044	18.4394	14.7471
pgaptmp_001660	pgaptmp_001660	pgaptmp_001660	protein_coding	protein_coding	pgaptmp_001660	0.4608	1098	GO:0006865	GO:0042626,GO:0140359		TRUE	0.569895	0.00120145	0.00714887	Chromosome_I	1745718	1746815	1098	-	7.0758	205.065	198.906	187.054	140.934	133.132	132.772	146.264	185.082	162.568	113.008	130.617	92.6295	108.996	123.203	105.396	138.206	99.8629	107.162	122.379	128.069	122.125	7.6957	7.48666	7.1106	6.91476	6.26938	5.91883	6.34261	7.32485
pgaptmp_003818	pgaptmp_003818	pgaptmp_003818	protein_coding	protein_coding	pgaptmp_003818	0.4348	660				TRUE	-0.980496	0.00120322	0.00715133	Chromosome_II	579338	579997	660	-	7.94798	181.167	183.064	239.331	449.067	408.955	350.484	306.635	288.071	308.95	153.368	168.713	174.144	132.562	149.841	139.65	256.186	274.29	247.399	476.106	381.657	290.774	11.3108	11.4631	15.1355	36.6548	32.0387	25.993	22.1213	18.9668
pgaptmp_004090	pgaptmp_004090	helD	protein_coding	protein_coding	pgaptmp_004090	0.4517	2070		GO:0003677,GO:0003678,GO:0005524		TRUE	-0.541489	0.00120626	0.00715973	Chromosome_II	896742	898811	2070	+	11.1815	1514.09	1658.14	1618.96	2622.65	2663.33	2055.9	2031.36	2318	2309.74	2766.68	2380.13	2786.3	3178.55	3384.2	3089.43	2368.04	2191.66	2200.13	2060.33	2119.82	2485.7	30.1398	33.1049	32.6442	68.255	66.527	48.6143	46.7251	48.661
pgaptmp_002394	pgaptmp_002394	pgaptmp_002394	protein_coding	protein_coding	pgaptmp_002394	0.4338	597				TRUE	-1.07222	0.00120735	0.00715973	Chromosome_I	2605866	2606462	597	-	9.55637	344.602	460.301	489.282	534.268	486.786	899.713	444.732	355.984	385.66	1089.72	934.273	1043.01	877.857	1175.42	1250.26	1557.34	1440.69	1222.44	1072.36	904.763	618.932	23.785	31.8647	34.2078	48.2113	42.1607	73.7671	35.4696	25.9116
pgaptmp_003361	pgaptmp_003361	gltS	protein_coding	protein_coding	pgaptmp_003361	0.4717	1236	GO:0015813	GO:0015501	GO:0016020	TRUE	-0.577069	0.00121066	0.00717125	Chromosome_II	96836	98071	1236	-	12.3498	2692.83	2366.63	2711.88	2898.75	2620.32	3948.51	3303.94	3780.74	3489.94	11139.4	8700.53	11487.9	9793.4	8416.65	9458	11162.6	10327.2	10331.2	3621.09	3790.45	3653.78	89.7737	79.1324	91.5783	126.345	109.617	156.368	127.276	132.922
pgaptmp_003563	pgaptmp_003563	pgaptmp_003563	protein_coding	protein_coding	pgaptmp_003563	0.4294	531				TRUE	-0.9218	0.00121417	0.00718397	Chromosome_II	316573	317103	531	-	8.21081	228.964	263.155	338.168	472.129	447.188	533.561	553.873	361.208	440.553	163.458	165.085	205.638	170.858	150.951	165.999	261.243	207.715	232.846	564.957	546.044	397.114	17.7677	20.4814	26.5815	47.8994	43.5451	49.1838	49.6648	29.5597
pgaptmp_004440	pgaptmp_004440	pgaptmp_004440	protein_coding	protein_coding		0.5	1000				TRUE	-1.71593	0.00121825	0.00719998	pgaptmp_004440	1	1000	1000	+	12.2682	1362.99	1626.46	2070.67	3377.29	5223.56	7861.57	2658	2569.5	1672.84	13799.1	15048.1	15609.9	5952.04	5059.09	6361.98	11921.1	8590.88	7014.49	8168.13	4693.94	2867.86	56.1631	67.2177	86.4273	181.942	270.091	384.806	126.557	111.657
pgaptmp_003854	pgaptmp_003854	pgaptmp_003854	protein_coding	protein_coding	pgaptmp_003854	0.4717	918		GO:0001216		TRUE	-0.684697	0.00122272	0.00721831	Chromosome_II	620337	621254	918	+	8.70561	294.492	309.801	306.312	410.63	441.043	362.854	496.704	521.662	584.12	395.529	455.345	376.076	494.899	446.194	470.331	338.773	351.518	437.909	376.079	499.531	535.854	13.2187	13.947	13.9271	24.0975	24.8418	19.3474	25.7625	24.6936
pgaptmp_003783	pgaptmp_003783	pgaptmp_003783	protein_coding	protein_coding	pgaptmp_003783	0.4583	360				TRUE	-1.19778	0.00122475	0.00722216	Chromosome_II	537902	538261	360	+	6.95803	43.9426	80.9708	49.0099	170.402	135.863	146.791	216.798	144.782	156.235	123.098	123.36	75.9562	54.4978	109.884	77.7298	249.444	199.726	437.909	111.762	113.414	184.433	5.02969	9.29538	5.68227	25.4998	19.5139	19.9586	28.6738	17.4763
pgaptmp_003495	pgaptmp_003495	pgaptmp_003495	protein_coding	protein_coding	pgaptmp_003495	0.443	921	GO:0006355	GO:0003677,GO:0003700		TRUE	-0.714287	0.00122698	0.00722725	Chromosome_II	247006	247926	921	+	9.02406	477.972	431.257	449.257	677.764	611.043	506.347	869.418	941.082	889.552	385.439	433.575	372.371	397.687	420.666	429.49	335.402	391.463	363.822	572.78	746.111	827.458	21.3846	19.3517	20.3599	39.6445	34.3049	26.9105	44.9471	44.4023
pgaptmp_003740	pgaptmp_003740	nqrC	protein_coding	protein_coding	pgaptmp_003740	0.4664	744	GO:0006814	GO:0010181,GO:0016655	GO:0016020	TRUE	-0.993333	0.00123149	0.00724565	Chromosome_II	497693	498436	744	+	6.25556	63.9866	57.2076	49.0099	105.7	125.622	84.9409	80.9278	90.302	115.417	76.6841	83.4496	72.251	69.2269	68.8161	67.1901	33.7087	38.6137	55.5655	83.8215	112.14	152.033	3.54384	3.17777	2.74949	7.65364	8.73047	5.58826	5.17914	5.27427
pgaptmp_002138	pgaptmp_002138	pgaptmp_002138	protein_coding	protein_coding	pgaptmp_002138	0.4371	1455	GO:0005975	GO:0004564	GO:0005737	TRUE	0.613614	0.00123729	0.00727114	Chromosome_I	2323018	2324472	1455	-	8.18193	473.347	419.816	467.227	335.038	312.007	291.108	348.212	378.373	401.143	185.656	194.111	209.343	223.883	218.657	248.999	200.567	227.688	358.53	250.906	305.836	284.127	13.4052	11.9244	13.4031	12.405	11.0878	9.79318	11.395	11.3004
pgaptmp_003889	pgaptmp_003889	pgaptmp_003889	protein_coding	protein_coding	pgaptmp_003889	0.3984	369				TRUE	-0.694616	0.00123858	0.00727114	Chromosome_II	658180	658548	369	+	5.28922	30.8369	36.9649	29.4059	66.6233	49.8392	47.0061	47.5173	37.3149	41.5218	36.3241	21.7695	27.7889	26.5124	42.1776	23.7142	30.3378	37.2822	38.3667	58.1163	48.424	56.4931	3.44352	4.14004	3.32621	9.72666	6.98376	6.23535	6.13137	4.39434
pgaptmp_005169	pgaptmp_005169	pgaptmp_005169	protein_coding	protein_coding	pgaptmp_005169	0.4483	687	GO:0034220	GO:0005267		TRUE	-0.659806	0.00124293	0.00728852	Chromosome_II	2136985	2137671	687	+	6.24346	84.8015	89.7719	73.5148	108.263	128.353	83.2915	115.081	141.797	146.382	26.234	29.0259	48.1674	44.1874	69.926	64.5552	38.765	55.9232	41.0127	116.233	138.9	131.263	5.08634	5.40039	4.46641	8.48959	9.66037	5.9344	7.97589	8.96905
pgaptmp_004663	pgaptmp_004663	pgaptmp_004663	protein_coding	protein_coding	pgaptmp_004663	0.4574	282				TRUE	-0.837832	0.00124465	0.00729052	Chromosome_II	1577375	1577656	282	-	6.41859	49.3391	59.8479	64.5296	114.028	103.092	123.7	66.8212	64.1816	63.3384	60.5401	87.0778	114.861	72.1728	71.0359	63.2378	161.802	111.846	101.87	109.527	118.511	82.2474	7.20941	8.77085	9.55105	21.7835	18.9025	21.4711	11.2823	9.89006
pgaptmp_001108	pgaptmp_001108	pgaptmp_001108	protein_coding	protein_coding	pgaptmp_001108	0.475	2061	GO:0006812	GO:0042625	GO:0016020	TRUE	1.09517	0.00125228	0.0073206	Chromosome_I	1181154	1183214	2061	-	9.59523	2990.41	2216.13	1910.57	1441.37	1486.98	1072.07	1306.72	2176.2	1902.26	304.719	335.612	289.004	329.933	317.442	258.221	337.087	319.561	287.089	849.95	946.179	1399.04	59.7876	44.4385	38.6924	37.6757	37.3055	25.4611	30.1883	45.8838
pgaptmp_002898	pgaptmp_002898	pgaptmp_002898	protein_coding	protein_coding	pgaptmp_002898	0.4594	690	GO:0006355	GO:0003677		TRUE	0.650784	0.00125257	0.0073206	Chromosome_I	3151126	3151815	690	-	8.41971	734.689	792.105	700.841	493.269	522.288	453.568	645.195	721.67	686.869	153.368	195.925	161.175	235.666	220.877	155.46	126.408	131.819	177.281	383.344	503.354	458.591	43.8746	47.4434	42.3947	38.5122	39.1386	32.1755	44.522	45.4493
pgaptmp_002891	pgaptmp_002891	pgaptmp_002891	protein_coding	protein_coding	pgaptmp_002891	0.3946	294				TRUE	0.658547	0.00125663	0.00733617	Chromosome_I	3142420	3142713	294	+	8.12522	315.307	336.205	338.168	203.073	213.012	333.991	235.359	190.306	215.35	280.502	293.888	226.016	328.46	257.505	351.76	573.048	460.701	396.897	210.671	209.625	166.987	44.1921	47.2605	48.0094	37.2108	37.4628	55.6058	38.1168	28.1282
pgaptmp_004935	pgaptmp_004935	pgaptmp_004935	protein_coding	protein_coding	pgaptmp_004935	0.3476	210				TRUE	-1.5253	0.00126003	0.00734366	Chromosome_II	1866338	1866547	210	+	9.50567	588.985	712.895	724.529	2666.85	1791.48	1477.81	590.996	675.4	871.958	528.717	277.561	374.223	503.736	681.501	508.537	391.021	300.92	281.797	2434.74	2152.95	956.229	115.569	140.297	144.005	684.139	441.1	344.454	133.998	139.759
pgaptmp_004758	pgaptmp_004758	pgaptmp_004758	protein_coding	protein_coding	pgaptmp_004758	0.4564	447				TRUE	-0.722459	0.00126071	0.00734366	Chromosome_II	1680040	1680486	447	+	5.19142	23.8986	29.924	22.8713	50.6081	37.5501	47.0061	49.7446	26.1204	42.2256	16.144	34.4683	37.0518	35.3499	45.5074	30.3014	30.3378	49.2657	33.0747	40.7931	42.6895	51.5085	2.20304	2.76664	2.13562	6.09925	4.34358	5.1473	5.29873	2.53928
pgaptmp_001688	pgaptmp_001688	pgaptmp_001688	protein_coding	protein_coding	pgaptmp_001688	0.44	1641	GO:0006508	GO:0004176,GO:0004252		TRUE	0.645948	0.00126524	0.0073619	Chromosome_I	1785485	1787125	1641	-	11.5358	5078.84	4972.66	4676.36	3027.52	3434.13	2148.26	3403.42	4188.22	4096.58	2340.88	2271.28	2289.8	2567.29	2698.26	2754.8	2204.55	2054.51	1955.38	2528.62	3150.11	3306.51	127.531	125.234	118.943	99.3899	108.206	64.0784	98.7507	110.907
pgaptmp_002084	pgaptmp_002084	pgaptmp_002084	protein_coding	protein_coding	pgaptmp_002084	0.4608	879		GO:0050661,GO:0051287		TRUE	0.740225	0.00127544	0.00741307	Chromosome_I	2256789	2257667	879	+	9.53475	1636.67	1958.26	2094.35	1008.96	849.315	1142.17	2508.02	1985.15	1871.3	252.25	239.464	289.004	243.031	239.746	274.03	455.068	384.805	500.09	997.476	1269.22	957.891	76.7238	92.0711	99.4494	61.837	49.9602	63.6023	135.855	98.1392
pgaptmp_002290	pgaptmp_002290	thiK	protein_coding	protein_coding	pgaptmp_002290	0.4501	882	GO:0009228,GO:0016310	GO:0019165		TRUE	0.530516	0.0012808	0.00743599	Chromosome_I	2488121	2489002	882	-	11.0485	2429.18	2467.85	2471.73	1616.26	1957.39	2050.13	1747	2081.42	1879.04	2546.72	2759.28	2840.02	2097.43	1722.62	1716.64	3193.9	2410.03	2618.2	1707.17	1587.8	1557.72	113.488	115.636	116.97	98.7201	114.75	113.774	94.31	102.549
pgaptmp_004610	pgaptmp_004610	pgaptmp_004610	protein_coding	protein_coding	pgaptmp_004610	0.4704	3378				TRUE	0.767622	0.00128579	0.00745671	Chromosome_II	1507690	1511067	3378	-	11.2473	1958.91	1471.56	1686.76	1155.02	1514.29	1164.43	1558.42	1990.38	1881.15	3456.84	3956.6	2908.57	7221.7	7102.48	5479.29	6182.18	6686.82	5471.88	837.098	894.569	1140.66	23.8954	18.0036	20.8417	18.4201	23.179	16.8728	21.9663	25.6043
pgaptmp_005272	pgaptmp_005272	pgaptmp_005272	protein_coding	protein_coding	pgaptmp_005272	0.4526	939	GO:0006355	GO:0003700		TRUE	-0.606499	0.0012962	0.00750884	Chromosome_II	2256470	2257408	939	+	8.19397	273.678	290.439	282.623	433.051	376.867	331.517	431.368	414.942	422.959	221.98	192.297	177.849	207.681	239.746	167.317	300.008	234.345	205.063	385.579	368.277	490.161	12.0097	12.7829	12.5627	24.8449	20.7523	17.2812	21.8733	19.2025
pgaptmp_004352	pgaptmp_004352	pgaptmp_004352	protein_coding	protein_coding	pgaptmp_004352	0.4141	990		GO:0005524,GO:0008716,GO:0046872		TRUE	-0.609246	0.00130513	0.00755226	Chromosome_II	1218183	1219172	990	+	11.7872	3961.77	4418.19	4214.85	6450.93	5437.94	4602.48	6261.88	5913.66	5985.47	2425.64	2400.08	2804.82	1570.13	2088.9	1765.39	2005.67	1561.86	1845.57	6776.13	5722.31	5800.52	164.897	184.438	177.7	351.036	284.016	227.556	301.164	259.573
pgaptmp_005185	pgaptmp_005185	pgaptmp_005185	protein_coding	protein_coding	pgaptmp_005185	0.465	243				TRUE	-1.3633	0.0013106	0.00757553	Chromosome_II	2154628	2154870	243	-	4.43778	13.8766	13.2018	13.0693	27.5462	28.6746	10.7207	23.0162	14.926	19.7053	14.126	39.9107	16.6733	16.2021	22.1987	23.7142	13.4835	25.2986	14.5529	26.2641	36.9551	72.278	2.35307	2.24526	2.24485	6.10688	6.10148	2.15948	4.50982	2.66915
pgaptmp_000739	pgaptmp_000739	ptsG	protein_coding	protein_coding	pgaptmp_000739	0.478	1410	GO:0009401,GO:1904659	GO:0008982		TRUE	0.607305	0.00131337	0.00758326	Chromosome_I	773311	774720	1410	-	7.69093	351.541	434.778	408.415	230.619	252.61	234.206	369.001	281.354	265.317	127.134	123.36	137.092	113.414	148.731	126.476	151.689	107.852	142.883	241.965	265.695	230.126	10.2734	12.7435	12.0899	8.81131	9.2635	8.13039	12.4607	8.67105
pgaptmp_003958	pgaptmp_003958	pgaptmp_003958	protein_coding	protein_coding	pgaptmp_003958	0.4524	378				TRUE	-0.684543	0.00133005	0.00767112	Chromosome_II	726645	727022	378	+	9.9128	1083.15	1341.3	1216.26	1882.11	1723.89	1967.66	2018.74	1819.47	1902.97	484.321	511.582	426.096	360.864	483.932	471.648	534.283	414.098	470.984	2157.57	1712.68	1704.76	118.074	146.648	134.3	268.236	235.81	254.795	254.286	209.166
pgaptmp_004039	pgaptmp_004039	pgaptmp_004039	protein_coding	protein_coding	pgaptmp_004039	0.4487	633		GO:0015035		TRUE	-1.0031	0.00133352	0.00768271	Chromosome_II	809278	809910	633	-	11.0987	1350.66	1695.99	2145	2894.91	2649.67	3203.01	2363.98	1937.39	1946.6	2399.41	2993.3	2469.5	1365.39	1799.21	1922.17	1724.2	1858.78	1461.9	4162.02	2918.82	2800.56	87.9224	110.729	141.437	246.374	216.437	247.678	177.817	133
pgaptmp_001553	pgaptmp_001553	citF	protein_coding	protein_coding	pgaptmp_001553	0.4766	1473	GO:0006113	GO:0008814,GO:0008815	GO:0009346	TRUE	0.743021	0.00133787	0.00769934	Chromosome_I	1610708	1612180	1473	+	6.42947	94.0526	98.5731	106.188	76.873	89.4376	73.3955	80.1854	94.0335	89.3775	94.8462	59.866	120.418	147.291	113.214	88.2694	53.9339	114.51	108.485	41.9108	61.1671	58.9855	2.63103	2.76565	3.00894	2.81148	3.1395	2.43893	2.59194	2.77407
pgaptmp_002302	pgaptmp_002302	fdxA	protein_coding	protein_coding	pgaptmp_002302	0.4599	324		GO:0009055,GO:0051539		TRUE	-0.580121	0.00134039	0.00770543	Chromosome_I	2503310	2503633	324	+	8.60507	275.99	335.325	292.425	342.726	300.401	602.833	290.301	173.887	219.573	569.077	513.396	731.773	400.633	400.687	347.808	588.217	533.934	420.711	461.577	407.144	427.852	35.1	42.7722	37.6713	56.9857	47.9402	91.0719	42.6615	23.3217
pgaptmp_003671	pgaptmp_003671	pgaptmp_003671	protein_coding	protein_coding	pgaptmp_003671	0.4167	180				TRUE	-0.567912	0.00134408	0.00771688	Chromosome_II	428322	428501	180	-	6.29399	80.9469	86.2515	88.2177	121.075	125.622	81.6422	112.111	102.989	122.454	60.5401	87.0778	44.4622	30.9312	51.0571	60.6029	32.0233	55.9232	55.5655	117.35	115.963	138.741	18.5304	19.8032	20.4562	36.2365	36.0859	22.2011	29.6557	24.8632
pgaptmp_003255	pgaptmp_003255	pgaptmp_003255	protein_coding	protein_coding	pgaptmp_003255	0.4671	882				TRUE	0.684727	0.00134532	0.00771688	Chromosome_I	3522901	3523782	882	-	13.2136	13895.1	14775.4	13797.9	10296.5	10518.1	7750.24	10032.8	12911	12837.3	7769.31	8442.92	9648.29	9058.42	7890.54	8184.02	7152.99	7352.58	7591.31	7289.12	9462.42	8420.8	649.16	692.329	652.958	628.905	616.615	430.11	541.611	636.103
pgaptmp_000299	pgaptmp_000299	metJ	protein_coding	protein_coding	pgaptmp_000299	0.4548	321				TRUE	-0.731982	0.00134912	0.00773025	Chromosome_I	311748	312068	321	-	10.324	886.561	1168.8	1058.61	1313.25	1278.75	1857.98	1167.89	822.42	878.292	1646.69	1717.97	1717.35	1151.82	1380.76	1413.63	1009.58	1189.03	1102.05	1926.22	1420.22	1585.13	113.805	150.479	137.649	220.397	205.98	283.314	173.232	111.334
pgaptmp_001525	pgaptmp_001525	pgaptmp_001525	protein_coding	protein_coding	pgaptmp_001525	0.4916	1131				TRUE	0.767711	0.00136326	0.00780278	Chromosome_I	1585100	1586230	1131	+	4.57786	33.1497	29.0439	28.5891	25.6243	17.751	21.4414	10.3944	22.3889	21.8165	28.252	23.5836	22.2311	35.3499	32.1882	40.8411	18.5398	25.2986	27.7828	11.1762	14.0175	17.4464	1.20774	1.06129	1.05506	1.22055	0.811528	0.927947	0.437592	0.860218
pgaptmp_001723	pgaptmp_001723	pgaptmp_001723	protein_coding	protein_coding	pgaptmp_001723	0.4502	633	GO:0061077			TRUE	1.30841	0.00137083	0.0078356	Chromosome_I	1819363	1819995	633	-	8.43582	656.055	477.903	451.707	245.994	352.971	164.109	283.619	435.838	418.737	893.976	1063.08	861.455	253.341	275.264	223.967	298.322	342.197	209.032	149.202	153.555	304.066	42.7066	31.2017	29.7848	20.9356	28.8323	12.69	21.3336	29.9198
pgaptmp_001516	pgaptmp_001516	pgaptmp_001516	protein_coding	protein_coding	pgaptmp_001516	0.4802	1797	GO:0006508	GO:0004177,GO:0046872,GO:0070006	GO:0016020	TRUE	0.748959	0.00137197	0.0078356	Chromosome_I	1573646	1575442	1797	-	6.39291	109.471	130.257	140.495	86.4822	84.6584	76.6942	92.8072	96.2724	85.8587	58.5221	58.0519	68.5459	76.5915	73.2558	68.5076	111.239	97.1999	76.7334	75.4394	73.2731	56.4931	2.51021	2.99568	3.26327	2.59264	2.43594	2.08904	2.45904	2.32804
pgaptmp_001127	pgaptmp_001127	pgaptmp_001127	protein_coding	protein_coding	pgaptmp_001127	0.3902	369				TRUE	0.584679	0.00137754	0.00785341	Chromosome_I	1197332	1197700	369	+	6.58176	148.017	168.982	180.52	142.215	108.554	119.577	127.703	144.035	143.567	40.3601	39.9107	55.5777	72.1728	67.7061	84.317	69.1029	73.2328	71.4414	96.6742	109.591	102.186	16.5289	18.9259	20.4192	20.7627	15.2112	15.8619	16.4781	16.9621
pgaptmp_001991	pgaptmp_001991	cls	protein_coding	protein_coding	pgaptmp_001991	0.4623	1458	GO:0032049	GO:0008808,GO:0016780		TRUE	0.569984	0.00137871	0.00785341	Chromosome_I	2155020	2156477	1458	+	11.3603	3713.53	3593.52	3988.59	2782.8	3121.44	2580.39	3075.26	3621.78	3443.5	2286.4	2414.6	2343.53	2579.07	2644.98	2609.88	1653.41	1659.06	1604.79	2377.18	2584.95	2274.68	104.951	101.86	114.183	102.823	110.698	86.6284	100.428	107.945
pgaptmp_000595	pgaptmp_000595	pgaptmp_000595	protein_coding	protein_coding	pgaptmp_000595	0.4529	2844		GO:0046872		TRUE	0.744589	0.00137988	0.00785341	Chromosome_I	598615	601458	2844	+	11.5176	4203.07	3265.23	3198.71	1820.61	2117.14	1446.47	1967.51	2722.49	2571.54	3688.91	3782.44	3653.31	4399.59	4984.72	4741.52	3370.87	3656.32	3525.77	1872.01	1897.45	2322.86	60.8969	47.4489	46.9447	34.4867	38.4915	24.895	32.9398	41.5982
pgaptmp_002251	pgaptmp_002251	pgaptmp_002251	protein_coding	protein_coding	pgaptmp_002251	0.4587	2226	GO:0006099	GO:0004450		TRUE	0.950259	0.00138106	0.00785341	Chromosome_I	2439059	2441284	2226	-	11.3649	4631.7	3665.69	3369.43	3482.35	3875.85	1607.28	2420.41	4221.81	3564.54	1862.62	2064.47	1898.91	2611.48	3070.08	2638.86	2384.89	2407.36	2559.98	1523.32	1788.5	2479.05	85.7381	68.0568	63.1789	84.2774	90.0298	35.3426	51.7722	82.4158
pgaptmp_003121	pgaptmp_003121	pckA	protein_coding	protein_coding	pgaptmp_003121	0.4721	1629	GO:0006094	GO:0004612		TRUE	0.624101	0.00138915	0.00789088	Chromosome_I	3377293	3378921	1629	+	8.73472	834.909	772.743	659.182	548.361	515.461	353.783	699.395	828.391	716.427	203.818	252.163	209.343	366.756	433.985	414.998	224.163	221.03	248.722	450.401	466.399	481.022	21.1192	19.6045	16.8898	18.1347	16.3613	10.6304	20.4425	22.0979
pgaptmp_003354	pgaptmp_003354	pgaptmp_003354	protein_coding	protein_coding	pgaptmp_003354	0.4376	777				TRUE	-0.841335	0.00139265	0.00790222	Chromosome_II	90466	91242	777	+	6.88161	83.2597	108.254	80.8663	155.027	162.49	157.512	168.538	120.154	137.937	119.062	81.6355	111.155	116.36	95.4545	92.2218	99.4407	91.8739	82.0253	173.79	176.493	128.771	4.41542	5.75793	4.34397	10.7486	10.8131	9.92258	10.3278	6.71977
pgaptmp_003334	pgaptmp_003334	rnk	protein_coding	protein_coding	pgaptmp_003334	0.4249	393	GO:0032784	GO:0003677,GO:0070063		TRUE	-0.722172	0.00139903	0.00792985	Chromosome_II	70513	70905	393	+	6.77843	101.762	101.213	116.807	199.229	167.951	155.862	193.039	163.439	180.162	72.6481	65.3084	66.6933	55.9707	58.8266	46.1109	92.699	86.5479	84.6713	185.525	186.687	142.064	10.6697	10.6436	12.4056	27.3102	22.0971	19.4125	23.3876	18.0718
pgaptmp_000245	pgaptmp_000245	pgaptmp_000245	protein_coding	protein_coding		0.5	1000				TRUE	-0.888661	0.0014012	0.00793361	pgaptmp_000245	1	1000	1000	+	10.5677	565.857	667.129	810.296	682.248	786.504	1067.12	645.195	564.201	487.002	3361.99	4444.6	4814.88	2635.04	2366.38	2873.37	5513.06	3994.52	4277.22	1504.88	1013.08	1090.82	23.3166	27.5709	33.8209	36.7542	40.6673	52.2332	30.7202	24.5172
pgaptmp_004939	pgaptmp_004939	pgaptmp_004939	protein_coding	protein_coding	pgaptmp_004939	0.46	924		GO:0001216		TRUE	-0.568787	0.00140477	0.00794528	Chromosome_II	1870157	1871080	924	-	8.15378	236.673	282.518	270.371	426.645	419.196	425.529	491.507	527.633	463.074	159.422	175.97	170.438	191.479	240.856	196.301	215.736	210.378	190.51	400.108	338.331	387.144	10.5544	12.6362	12.2132	24.8748	23.4579	22.5419	25.3274	24.814
pgaptmp_001714	pgaptmp_001714	pgaptmp_001714	protein_coding	protein_coding	pgaptmp_001714	0.4506	1032				TRUE	-0.543064	0.00141081	0.00796761	Chromosome_I	1810228	1811259	1032	+	10.7756	1445.48	1389.7	1333.07	1651.49	1798.31	1521.51	963.71	1040.34	1032.42	3410.43	3784.26	3301.32	1637.88	2279.81	2144.81	1687.12	1633.76	1529.38	2004.45	1764.93	2039.57	57.7153	55.6525	53.9155	86.2105	90.1008	72.1654	44.463	43.8059
pgaptmp_000911	pgaptmp_000911	pgaptmp_000911	protein_coding	protein_coding	pgaptmp_000911	0.4476	735	GO:0006352,GO:0006355	GO:0003677,GO:0003899,GO:0016987		TRUE	0.541471	0.00141259	0.00796761	Chromosome_I	958821	959555	735	+	12.7228	6942.16	6858.75	6704.55	4659.79	5209.23	4021.91	5347.18	6487.57	5969.99	8707.69	9986.74	10154.1	8068.62	7648.57	7791.42	10444.6	9834.5	10607.7	4320.16	4279.79	4845.95	389.193	385.655	380.735	341.541	366.463	267.841	346.394	383.559
pgaptmp_001431	pgaptmp_001431	pgaptmp_001431	protein_coding	protein_coding	pgaptmp_001431	0.4465	990				TRUE	0.565051	0.00141327	0.00796761	Chromosome_I	1484082	1485071	990	-	8.67127	640.637	741.058	813.564	623.312	533.212	547.58	592.481	642.562	631.272	217.944	183.226	235.279	262.179	274.154	285.887	284.839	241.003	269.89	487.282	451.107	466.068	26.6646	30.9356	34.3002	33.9183	27.8489	27.0735	28.4952	28.2044
pgaptmp_000944	pgaptmp_000944	pgaptmp_000944	protein_coding	protein_coding	pgaptmp_000944	0.4318	264				TRUE	-0.830026	0.00141663	0.00797803	Chromosome_I	992577	992840	264	+	10.0292	589.756	793.865	684.504	861.619	832.93	1189.17	577.632	487.332	475.038	1218.87	1317.05	1352.39	1394.85	1378.54	1569.09	2290.51	1790.88	1631.25	1438.94	1054.5	1012.72	92.0506	124.275	108.221	175.823	163.135	220.482	104.179	80.2156
pgaptmp_002295	pgaptmp_002295	pgaptmp_002295	protein_coding	protein_coding	pgaptmp_002295	0.4563	1992			GO:0098561	TRUE	0.571046	0.00142284	0.00800444	Chromosome_I	2492228	2494219	1992	+	9.11334	864.975	844.912	891.979	743.747	636.304	675.404	610.3	543.305	564.415	341.043	409.991	355.697	281.327	341.86	367.57	744.962	611.161	747.489	612.456	526.292	521.731	17.8926	17.5293	18.6899	20.1141	16.5165	16.5961	14.5877	11.852
pgaptmp_000402	pgaptmp_000402	pgaptmp_000402	protein_coding	protein_coding	pgaptmp_000402	0.4874	1266	GO:0030001	GO:0046872,GO:0046873		TRUE	0.602924	0.00142526	0.00800945	Chromosome_I	440782	442047	1266	-	9.00458	610.571	755.14	671.435	486.863	387.108	607.781	686.031	541.066	584.12	365.259	328.356	342.729	572.963	610.465	620.521	534.283	548.58	533.165	441.46	437.09	388.806	19.8729	24.6511	22.1366	20.7175	15.8104	23.4988	25.8014	18.5718
pgaptmp_004355	pgaptmp_004355	pgaptmp_004355	protein_coding	protein_coding	pgaptmp_004355	0.3839	1068		GO:0016747		TRUE	-0.59589	0.00142957	0.00802512	Chromosome_II	1220036	1221103	1068	-	8.99436	366.188	425.977	356.138	858.415	751.685	545.931	495.961	449.271	520.782	456.069	473.486	403.865	453.657	684.831	586.267	615.184	444.723	414.096	585.074	558.15	519.238	14.1283	16.4838	13.9184	43.3003	36.3922	25.0207	22.1111	18.2799
[truncated: 4,341 more rows]
[truncated: 14 more columns]
