# Supplementary material for: Phage Resistance in Vibrio harveyi: Evolutionary strategies and physiological trade-offs
Source: Research Square preprint supplement (doi:10.21203/rs.3.rs-7655806/v1), 2025-10-10
Supplement: Supplementary file 7 [file d57bd8b0c6d78ebbf67b9803.xlsx]

## Sheet: R1D4
Libraries	Chromosome	Position	Ref	Var	Score	Var_coverage	Var_fraction	Ref_nt	Var_nt	Ref_aa_pos_change	Function	Upstream_feature	Downstream_feature	Type	snpEff_impact
R1D4	Chromosome I	1418075	A	G	4701.11	155.6	1	caa	cGa	Gln87Arg	hypothetical protein	hypothetical protein	hypothetical protein	missense_variant	MODERATE
R1D4	Chromosome I	523276	C	T	7471.83	243	1	tcg	tTg	Ser16Leu	Twitching motility protein PilT	Pyridoxal phosphate-containing protein YggS	Type IV pilus assembly ATPase component PilU	missense_variant	MODERATE
R1D4	Chromosome II	1991609	C	A	4688.53	176.4	1					Transmembrane component MtsC of energizing module of methionine-regulated ECF transporter	Uncharacterized MFS-type transporter	intergenic_region	MODIFIER

## Sheet: R2D4
Libraries	Chromosome	Position	Ref	Var	Score	Var_coverage	Var_fraction	Ref_nt	Var_nt	Ref_aa_pos_change	Function	Upstream_feature	Downstream_feature	Type	snpEff_impact
2:R2D4,R4D4	Chromosome I	420529	ATGCTTGCTT	ATGCTTGCTTGCTT	4380.87	171.5	0.86	atgcttgcttgcctg	ATGCTTGCTTGCTTgcctg	Leu16fs	MSHA biogenesis protein MshQ	MSHA biogenesis protein MshP	Rod shape-determining protein MreB	frameshift_variant	HIGH

## Sheet: R3D4
Libraries	Chromosome	Position	Ref	Var	Score	Var_coverage	Var_fraction	Ref_nt	Var_nt	Ref_aa_pos_change	Function	Upstream_feature	Downstream_feature	Type	snpEff_impact
R3D4	Chromosome I	1418075	A	G	4701.11	155.6	1	caa	cGa	Gln87Arg	hypothetical protein	hypothetical protein	hypothetical protein	missense_variant	MODERATE
R3D4	Chromosome I	2441290	T	C	5855.96	178	1					Isocitrate dehydrogenase [NADP] (EC 1.1.1.42)	LSU rRNA pseudouridine(2457) synthase (EC 5.4.99.20)	intergenic_region	MODIFIER
R3D4	Chromosome I	523276	C	T	7471.83	243	1	tcg	tTg	Ser16Leu	Twitching motility protein PilT	Pyridoxal phosphate-containing protein YggS	Type IV pilus assembly ATPase component PilU	missense_variant	MODERATE
R3D4	Chromosome II	1991609	C	A	4688.53	176.4	1					Transmembrane component MtsC of energizing module of methionine-regulated ECF transporter	Uncharacterized MFS-type transporter	intergenic_region	MODIFIER

## Sheet: R4D4
Libraries	Chromosome	Position	Ref	Var	Score	Var_coverage	Var_fraction	Ref_nt	Var_nt	Ref_aa_pos_change	Function	Upstream_feature	Downstream_feature	Type	snpEff_impact
R4D4	Chromosome I	128290	C	G	22.1935	3	0.3				SSU rRNA ## 16S rRNA, small subunit ribosomal RNA	hypothetical protein	tRNA-Glu-TTC	intergenic_region	MODIFIER
R4D4	Chromosome I	420529	ATGCTTGCTT	ATGCTTGCTTGCTT	4380.87	171.5	0.86	atgcttgcttgcctg	ATGCTTGCTTGCTTgcctg	Leu16fs	MSHA biogenesis protein MshQ	MSHA biogenesis protein MshP	Rod shape-determining protein MreB	frameshift_variant	HIGH

## Sheet: R5D4
Libraries	Chromosome	Position	Ref	Var	Score	Var_coverage	Var_fraction	Ref_nt	Var_nt	Ref_aa_pos_change	Function	Upstream_feature	Downstream_feature	Type	snpEff_impact
R5D4	Chromosome I	1418075	A	G	4701.11	155.6	1	caa	cGa	Gln87Arg	hypothetical protein	hypothetical protein	hypothetical protein	missense_variant	MODERATE
R5D4	Chromosome I	523276	C	T	7471.83	243	1	tcg	tTg	Ser16Leu	Twitching motility protein PilT	Pyridoxal phosphate-containing protein YggS	Type IV pilus assembly ATPase component PilU	missense_variant	MODERATE
R5D4	Chromosome II	1991609	C	A	4688.53	176.4	1					Transmembrane component MtsC of energizing module of methionine-regulated ECF transporter	Uncharacterized MFS-type transporter	intergenic_region	MODIFIER

## Sheet: R7D4
Libraries	Chromosome	Position	Ref	Var	Score	Var_coverage	Var_fraction	Ref_nt	Var_nt	Ref_aa_pos_change	Function	Upstream_feature	Downstream_feature	Type	snpEff_impact
R7D4	Chromosome I	1072727	A	G	6064.08	215.3	1	cca	ccG	Pro48Pro	Acetaldehyde dehydrogenase (EC 1.2.1.10) / Alcohol dehydrogenase (EC 1.1.1.1)	UPF0056 inner membrane protein YchE	Oxidoreductase, short-chain dehydrogenase/reductase family	synonymous_variant	LOW
R7D4	Chromosome I	1097445	C	T	6628.01	317	1	cgc	Tgc	Arg346Cys	Regulatory protein LuxO	Excinuclease ABC subunit B	Phosphorelay protein LuxU	missense_variant	MODERATE
R7D4	Chromosome I	1102555	C	T	6565.02	148.3	1					Molybdopterin synthase catalytic subunit MoaE (EC 2.8.1.12)	Oligopeptide ABC transporter, substrate-binding protein OppA (TC 3.A.1.5.1)	intergenic_region	MODIFIER
R7D4	Chromosome I	1218614	A	G	5619.2	212.7	1					Transcriptional regulator, LysR family	Isochorismatase (EC 3.3.2.1)	intergenic_region	MODIFIER
R7D4	Chromosome I	12446	C	T	8806.5	401	1	gaa	Aaa	Glu219Lys	Glycyl-tRNA synthetase beta chain (EC 6.1.1.14)	Periplasmic alpha-amylase (EC 3.2.1.1)	Glycyl-tRNA synthetase alpha chain (EC 6.1.1.14)	missense_variant	MODERATE
R7D4	Chromosome I	1299318	A	G	7627.71	231	1	tct	Cct	Ser166Pro	Cytochrome c552 precursor (EC 1.7.2.2)	hypothetical protein	Cytochrome c-type protein NrfB precursor	missense_variant	MODERATE
R7D4	Chromosome I	1372967	A	G	4684.31	187.7	0.99					hypothetical protein	hypothetical protein	intergenic_region	MODIFIER
R7D4	Chromosome I	1728792	A	G	5848.39	174.7	0.99	ttc	Ctc	Phe21Leu	Type I secretion system, outer membrane component LapE	T1SS peptidoglycan-associated lipoprotein LapL	T1SS secreted agglutinin RTX	missense_variant	MODERATE
R7D4	Chromosome I	1751908	G	A	5805.81	256.3	1	cct	Tct	Pro111Ser	2-keto-3-deoxy-D-arabino-heptulosonate-7-phosphate synthase I alpha (EC 2.5.1.54)	UPF0234 protein Yitk	FIG01199578: hypothetical protein	missense_variant	MODERATE
R7D4	Chromosome I	1811154	G	A	5362.34	200.3	1	ctg	ctA	Leu309Leu	Spermidine/putrescine import ABC transporter substrate-binding protein PotD (TC 3.A.1.11.1)	Spermidine/putrescine import ABC transporter permease protein PotC (TC 3.A.1.11.1)	hypothetical protein	synonymous_variant	LOW
R7D4	Chromosome I	2130090	T	C	4906.53	196.3	1	atg	Gtg	Met494Val	Sulfate permease	Heat shock protein HslJ	hypothetical protein	missense_variant	MODERATE
R7D4	Chromosome I	2236229	T	C	6094.64	223	1	acg	Gcg	Thr43Ala	Leucine-responsive regulatory protein, regulator for leucine (or lrp) regulon and high-affinity branched-chain amino acid transport system	DNA translocase FtsK	Alanine dehydrogenase (EC 1.4.1.1)	missense_variant	MODERATE
R7D4	Chromosome I	2420993	G	A	5633.63	352.7	0.99	gaa	Aaa	Glu205Lys	Purine nucleotide synthesis repressor	TorA-specific chaperone protein, TorD	Positive regulator of competence TfoX	missense_variant	MODERATE
R7D4	Chromosome I	2707028	T	C	6108.49	355	1	agc	Ggc	Ser87Gly	Flagellar L-ring protein FlgH	Flagellar P-ring protein FlgI	Flagellar basal-body rod protein FlgG	missense_variant	MODERATE
R7D4	Chromosome I	271747	C	T	7665.18	428.5	1	tgg	tgA	Trp290*	Flavohemoglobin / Nitric oxide dioxygenase (EC 1.14.12.17)	Sodium-type flagellar protein MotX	Nitrite-sensitive transcriptional repressor NsrR	stop_gained	HIGH
R7D4	Chromosome I	2989344	A	G	8766.24	295	1	tat	tGt	Tyr196Cys	Two-component transcriptional response regulator BtsR	Sensor histidine kinase BtsS	4-hydroxy-3-methylbut-2-enyl diphosphate reductase (EC 1.17.7.4)	missense_variant	MODERATE
R7D4	Chromosome I	3072957	G	A	8096.53	419.3	1	gca	gTa	Ala489Val	Protein translocase subunit SecA	Mutator MutT protein (7,8-dihydro-8-oxoguanine-triphosphatase) (EC 3.6.1.-)	UDP-3-O-[3-hydroxymyristoyl] N-acetylglucosamine deacetylase (EC 3.5.1.108)	missense_variant	MODERATE
R7D4	Chromosome I	3138438	G	A	7224.74	284.3	0.99	ggc	gAc	Gly486Asp	DNA primase DnaG	Transamidase GatB domain protein	RNA polymerase sigma factor RpoD	missense_variant	MODERATE
R7D4	Chromosome I	3197183	T	C	8965.45	276	1	cac	cGc	His80Arg	Thiamin ABC transporter, ATPase component	Universal stress protein family 3	Thiamin ABC transporter, transmembrane component	missense_variant	MODERATE
R7D4	Chromosome I	3224313	T	C	10967.5	410.7	1	ttc	tCc	Phe141Ser	2',3'-cyclic-nucleotide 2'-phosphodiesterase (EC 3.1.4.16) / 3'-nucleotidase (EC 3.1.3.6)	Uroporphyrinogen-III methyltransferase (EC 2.1.1.107)	cAMP-binding proteins - catabolite gene activator and regulatory subunit of cAMP-dependent protein kinases	missense_variant	MODERATE
R7D4	Chromosome I	3266121	T	C	9364.48	288.5	1	act	Gct	Thr390Ala	Nucleoside-diphosphate sugar epimerase/dehydratase	UDP-glucose 6-dehydrogenase (EC 1.1.1.22)	4-keto-6-deoxy-N-Acetyl-D-hexosaminyl-(Lipid carrier) aminotransferase	missense_variant	MODERATE
R7D4	Chromosome I	3399751	G	A	10406.7	311	1					FIG01200292: hypothetical protein	Cytochrome c4	intergenic_region	MODIFIER
R7D4	Chromosome I	3479126	A	G	10819	403.7	1	agt	agC	Ser182Ser	Shikimate 5-dehydrogenase I alpha (EC 1.1.1.25)	FIG01199611: hypothetical protein	Coproporphyrinogen III oxidase, aerobic (EC 1.3.3.3)	synonymous_variant	LOW
R7D4	Chromosome I	392730	C	T	8230.43	269	1	ctg	Ttg	Leu412Leu	Phage integrase	Phage integrase	hypothetical protein	synonymous_variant	LOW
R7D4	Chromosome I	409323	C	T	7939.81	343.7	1	caa	Taa	Gln113*	MSHA biogenesis protein MshJ	MSHA biogenesis protein MshI	MSHA biogenesis protein MshK	stop_gained	HIGH
R7D4	Chromosome I	458600	C	T	8905.24	333.3	0.99	gcg	gTg	Ala69Val	Acid stress protein IbaG	Phospholipid ABC transporter-binding protein MlaB	UDP-N-acetylglucosamine 1-carboxyvinyltransferase (EC 2.5.1.7)	missense_variant	MODERATE
R7D4	Chromosome I	527274	C	T	9322.58	463.3	1	gct	Act	Ala105Thr	Glutathione synthetase (EC 6.3.2.3)	UPF0301 protein YqgE	16S rRNA (uracil(1498)-N(3))-methyltransferase (EC 2.1.1.193)	missense_variant	MODERATE
R7D4	Chromosome I	534692	T	C	9524.45	309.3	1	aaa	aGa	Lys34Arg	FIG01199603: hypothetical protein	Transketolase (EC 2.2.1.1)	D-erythrose-4-phosphate dehydrogenase (EC 1.2.1.72)	missense_variant	MODERATE
R7D4	Chromosome I	581385	CAGAAGAAGT	CAGAAGAAGAAGT	4937.35	180.3	0.95	gcagaagaagtactt	gCAGAAGAAGAAGTactt	Glu69dup	RNA polymerase sigma factor RpoS	Murein hydrolase activator NlpD	DNA mismatch repair protein MutS	disruptive_inframe_insertion	MODERATE
R7D4	Chromosome I	583902	C	T	7091.1	352.3	1	tgg	tAg	Trp307*	DNA mismatch repair protein MutS	RNA polymerase sigma factor RpoS	Nicotinamide-nucleotide amidase (EC 3.5.1.42)	stop_gained	HIGH
R7D4	Chromosome I	651083	C	T	8707	293.7	1	ctc	ctT	Leu14Leu	Ammonium transporter	Nitrogen regulatory protein P-II, GlnK	Ferric iron ABC transporter, iron-binding protein	synonymous_variant	LOW
R7D4	Chromosome I	930077	C	T	5765.49	226.3	1	ggc	ggT	Gly260Gly	Flagellin protein FlaD	Flagellin protein FlaF	Flagellin protein FlaA	synonymous_variant	LOW
R7D4	Chromosome I	949868	A	G	6195.79	306.3	1	gaa	gaG	Glu288Glu	Flagellar motor switch protein FliM	Flagellar basal body-associated protein FliL	Flagellar motor switch protein FliN	synonymous_variant	LOW
R7D4	Chromosome II	1051343	A	G	3059.03	102.3	0.99	gac	gGc	Asp308Gly	Putative two-component response regulator and GGDEF family protein YeaJ	Two-component system response regulator protein	Transcriptional regulator	missense_variant	MODERATE
R7D4	Chromosome II	1205138	C	T	3736.03	124	1					Lactam utilization protein LamB	GGDEF domain protein	intergenic_region	MODIFIER
R7D4	Chromosome II	1305258	G	A	4760.94	154	1	ttc	ttT	Phe11Phe	hypothetical protein	Lipase-related protein	Glucan 1,4-alpha-maltohexaosidase (EC 3.2.1.98)	synonymous_variant	LOW
R7D4	Chromosome II	1341833	C	A	3801.93	118.7	0.99	gta	Tta	Val30Leu	T6SS component Hcp	VgrG protein	T6SS AAA+ chaperone ClpV (TssH)	missense_variant	MODERATE
R7D4	Chromosome II	1594306	G	A	3160.49	115.3	0.99	atc	atT	Ile82Ile	Ribose ABC transporter, ATP-binding protein RbsA (TC 3.A.1.2.1)	Ribose ABC transporter, permease protein RbsC (TC 3.A.1.2.1)	D-ribose pyranase (EC 5.4.99.62)	synonymous_variant	LOW
R7D4	Chromosome II	16220	G	A	5289.65	170	0.99	gcg	gcA	Ala69Ala	FIG01200132: hypothetical protein	Pyrimidine/purine nucleoside phosphorylase PpnP	Chitinase (EC 3.2.1.14)	synonymous_variant	LOW
R7D4	Chromosome II	164021	G	A	5157.98	176.5	0.99	cag	Tag	Gln10*	Transcriptional regulator, LuxR family	Pyridoxamine 5'-phosphate oxidase (EC 1.4.3.5)	hypothetical protein	stop_gained	HIGH
R7D4	Chromosome II	1680292	G	A	4773.33	144	1	gag	Aag	Glu85Lys	FIG01201220: hypothetical protein	hypothetical protein	3-mercaptopyruvate sulfurtransferase (EC 2.8.1.2)	missense_variant	MODERATE
R7D4	Chromosome II	1777284	G	A	4898.94	166.3	1	gag	Aag	Glu279Lys	Periplasmic hemin-binding protein	Biopolymer transport protein ExbD1	Hemin ABC transporter, permease protein	missense_variant	MODERATE
R7D4	Chromosome II	2123634	G	A	2866.69	143	1	cca	Tca	Pro80Ser	Uncharacterized N-acetyltransferase YedL	ATPase involved in DNA repair	Histone acetyltransferase HPA2 and related acetyltransferases	missense_variant	MODERATE
R7D4	Chromosome II	2168856	G	A	5619.06	195.3	1	ccg	Tcg	Pro193Ser	L-fucose isomerase (EC 5.3.1.25) @ D-Arabinose ketol-isomerase (EC 5.3.1.3)	L-fuculokinase (EC 2.7.1.51)	Fucose permease	missense_variant	MODERATE
R7D4	Chromosome II	2172049	C	T	4502.82	175	1	gct	Act	Ala128Thr	MarC family integral membrane protein	L-fucose operon activator	hypothetical protein	missense_variant	MODERATE
R7D4	Chromosome II	2228918	T	C	5469.18	187.3	1	gtt	gCt	Val53Ala	3-ketoacyl-CoA thiolase (EC 2.3.1.16) @ Acetyl-CoA acetyltransferase (EC 2.3.1.9)	hypothetical protein	Butyrate--acetoacetate CoA-transferase subunit A (EC 2.8.3.9)	missense_variant	MODERATE
R7D4	Chromosome II	299254	A	G	6326.72	209.7	1	ttt	Ctt	Phe189Leu	hypothetical protein	hypothetical protein	Limit dextrin alpha-1,6-maltotetraose-hydrolase (EC 3.2.1.196)	missense_variant	MODERATE
R7D4	Chromosome II	372034	G	A	3110.17	184.5	1	tca	tTa	Ser82Leu	hypothetical protein sometimes fused to ribosomal protein S6 glutaminyl transferase	MBL-fold metallo-hydrolase superfamily	Ribosomal protein S6--L-glutamate ligase	missense_variant	MODERATE
R7D4	Chromosome II	373541	TAAAAAAAGCG	TAAAAAAAAGCG	3165.94	91	0.95					hypothetical protein	Transcriptional regulator, AcrR family	intergenic_region	MODIFIER
R7D4	Chromosome II	393939	T	C	4816.55	146	1	aga	Gga	Arg84Gly	Pyruvate/2-oxoglutarate dehydrogenase complex, dihydrolipoamide dehydrogenase component	L-2-hydroxyglutarate oxidase (EC 1.1.3.15)	Na(+)-translocating NADH-quinone reductase subunit B (EC 1.6.5.8)	missense_variant	MODERATE
R7D4	Chromosome II	419928	T	A	4888.88	184.3	1	ctt	ctA	Leu282Leu	FIG022979: MoxR-like ATPases	Outer membrane receptor protein	hypothetical protein	synonymous_variant	LOW
R7D4	Chromosome II	532805	A	G	4787.57	179	1	tgt	Cgt	Cys200Arg	Secreted trypsin-like serine protease	FOG: EAL domain protein	Transcriptional regulator, LysR family	missense_variant	MODERATE
R7D4	Chromosome II	549790	T	C	4219.68	147.3	1	ctt	cCt	Leu370Pro	Sensory box/GGDEF family protein ScrC (involved in swarmer cell regulation)	Extracellular solute-binding domain protein GSU1528	2-amino-3-ketobutyrate coenzyme A ligase (EC 2.3.1.29)	missense_variant	MODERATE
R7D4	Chromosome II	615294	A	G	4590.16	166.3	1	acc	Gcc	Thr233Ala	Glutathione synthetase (EC 6.3.2.3)	Nucleoprotein/polynucleotide-associated enzyme	hypothetical protein	missense_variant	MODERATE
R7D4	Chromosome II	857494	G	A	3930.1	131	0.99	gac	gaT	Asp359Asp	Alcohol dehydrogenase (EC 1.1.1.1)	PQQ-dependent oxidoreductase, gdhB family	hypothetical protein	synonymous_variant	LOW
R7D4	Chromosome II	863252	T	C	4757.6	141.7	1	ttg	Ctg	Leu130Leu	SAM-dependent methyltransferase	Transcriptional regulator	Acetoacetyl-CoA synthetase (EC 6.2.1.16)	synonymous_variant	LOW
R7D4	Chromosome II	94265	A	G	2591.24	83	1	aca	Gca	Thr100Ala	Transcriptional regulator, GntR family	hypothetical protein	Efflux ABC transporter, ATP-binding protein	missense_variant	MODERATE
R7D4	Chromosome II	973990	G	A	4432.82	137.7	0.99	gtg	Atg	Val1060Met	hypothetical protein	Tricorn protease N-terminal domain-containing protein	T6SS sigma-54-dependent regulator VasH	missense_variant	MODERATE

## Sheet: R8D4
Libraries	Chromosome	Position	Ref	Var	Score	Var_coverage	Var_fraction	Ref_nt	Var_nt	Ref_aa_pos_change	Function	Upstream_feature	Downstream_feature	Type	snpEff_impact
R8D4	Chromosome I	128290	C	G	22.1935	3	0.3				SSU rRNA ## 16S rRNA, small subunit ribosomal RNA	hypothetical protein	tRNA-Glu-TTC	intergenic_region	MODIFIER
R8D4	Chromosome I	1418075	A	G	4701.11	155.6	1	caa	cGa	Gln87Arg	hypothetical protein	hypothetical protein	hypothetical protein	missense_variant	MODERATE
R8D4	Chromosome I	523276	C	T	7471.83	243	1	tcg	tTg	Ser16Leu	Twitching motility protein PilT	Pyridoxal phosphate-containing protein YggS	Type IV pilus assembly ATPase component PilU	missense_variant	MODERATE
R8D4	Chromosome II	1991609	C	A	4688.53	176.4	1					Transmembrane component MtsC of energizing module of methionine-regulated ECF transporter	Uncharacterized MFS-type transporter	intergenic_region	MODIFIER

## Sheet: R9D4
Libraries	Chromosome	Position	Ref	Var	Score	Var_coverage	Var_fraction	Ref_nt	Var_nt	Ref_aa_pos_change	Function	Upstream_feature	Downstream_feature	Type	snpEff_impact
R9D4	Chromosome I	1072727	A	G	6064.08	215.3	1	cca	ccG	Pro48Pro	Acetaldehyde dehydrogenase (EC 1.2.1.10) / Alcohol dehydrogenase (EC 1.1.1.1)	UPF0056 inner membrane protein YchE	Oxidoreductase, short-chain dehydrogenase/reductase family	synonymous_variant	LOW
R9D4	Chromosome I	1097445	C	T	6628.01	317	1	cgc	Tgc	Arg346Cys	Regulatory protein LuxO	Excinuclease ABC subunit B	Phosphorelay protein LuxU	missense_variant	MODERATE
R9D4	Chromosome I	1100099	C	T	11611.5	366	1	cga	Tga	Arg214*	GTP 3',8-cyclase (EC 4.1.99.22)	FIG002813: LPPG:FO 2-phospho-L-lactate transferase like, CofD-like	Molybdenum cofactor biosynthesis protein MoaB	stop_gained	HIGH
R9D4	Chromosome I	1102555	C	T	6565.02	148.3	1					Molybdopterin synthase catalytic subunit MoaE (EC 2.8.1.12)	Oligopeptide ABC transporter, substrate-binding protein OppA (TC 3.A.1.5.1)	intergenic_region	MODIFIER
R9D4	Chromosome I	1218614	A	G	5619.2	212.7	1					Transcriptional regulator, LysR family	Isochorismatase (EC 3.3.2.1)	intergenic_region	MODIFIER
R9D4	Chromosome I	12446	C	T	8806.5	401	1	gaa	Aaa	Glu219Lys	Glycyl-tRNA synthetase beta chain (EC 6.1.1.14)	Periplasmic alpha-amylase (EC 3.2.1.1)	Glycyl-tRNA synthetase alpha chain (EC 6.1.1.14)	missense_variant	MODERATE
R9D4	Chromosome I	1372967	A	G	4684.31	187.7	0.99					hypothetical protein	hypothetical protein	intergenic_region	MODIFIER
R9D4	Chromosome I	158066	G	A	17375.9	549	0.99	gca	Aca	Ala1363Thr	DNA-directed RNA polymerase beta' subunit (EC 2.7.7.6)	DNA-directed RNA polymerase beta subunit (EC 2.7.7.6)	hypothetical protein	missense_variant	MODERATE
R9D4	Chromosome I	1728792	A	G	5848.39	174.7	0.99	ttc	Ctc	Phe21Leu	Type I secretion system, outer membrane component LapE	T1SS peptidoglycan-associated lipoprotein LapL	T1SS secreted agglutinin RTX	missense_variant	MODERATE
R9D4	Chromosome I	1751908	G	A	5805.81	256.3	1	cct	Tct	Pro111Ser	2-keto-3-deoxy-D-arabino-heptulosonate-7-phosphate synthase I alpha (EC 2.5.1.54)	UPF0234 protein Yitk	FIG01199578: hypothetical protein	missense_variant	MODERATE
R9D4	Chromosome I	1811154	G	A	5362.34	200.3	1	ctg	ctA	Leu309Leu	Spermidine/putrescine import ABC transporter substrate-binding protein PotD (TC 3.A.1.11.1)	Spermidine/putrescine import ABC transporter permease protein PotC (TC 3.A.1.11.1)	hypothetical protein	synonymous_variant	LOW
R9D4	Chromosome I	1850996	TCCCCCCCAAT	TCCCCCCCCAAT	2921.89	123	0.85					Uncharacterized protein VC1539.5	Riboflavin synthase eubacterial/eukaryotic (EC 2.5.1.9)	intergenic_region	MODIFIER
R9D4	Chromosome I	2130090	T	C	4906.53	196.3	1	atg	Gtg	Met494Val	Sulfate permease	Heat shock protein HslJ	hypothetical protein	missense_variant	MODERATE
R9D4	Chromosome I	2192298	T	C	11831.3	371	1	aac	aGc	Asn152Ser	Thymidine kinase (EC 2.7.1.21)	Uncharacterized SAM-binding protein YdcF	Cysteinyl-tRNA synthetase (EC 6.1.1.16)	missense_variant	MODERATE
R9D4	Chromosome I	2194797	A	G	11673.4	403	0.91	gaa	gGa	Glu125Gly	Peptidyl-prolyl cis-trans isomerase PpiB (EC 5.2.1.8)	Cysteinyl-tRNA synthetase (EC 6.1.1.16)	UDP-2,3-diacylglucosamine diphosphatase (EC 3.6.1.54)	missense_variant	MODERATE
R9D4	Chromosome I	2236229	T	C	6094.64	223	1	acg	Gcg	Thr43Ala	Leucine-responsive regulatory protein, regulator for leucine (or lrp) regulon and high-affinity branched-chain amino acid transport system	DNA translocase FtsK	Alanine dehydrogenase (EC 1.4.1.1)	missense_variant	MODERATE
R9D4	Chromosome I	232517	A	G	16110.3	508	1	acc	Gcc	Thr59Ala	hypothetical protein	Translation elongation factor P	Nitroreductase family protein	missense_variant	MODERATE
R9D4	Chromosome I	2352161	G	A	7435.36	261	0.91	cag	Tag	Gln132*	hypothetical protein	hypothetical protein	hypothetical protein	stop_gained	HIGH
R9D4	Chromosome I	2420993	G	A	5633.63	352.7	0.99	gaa	Aaa	Glu205Lys	Purine nucleotide synthesis repressor	TorA-specific chaperone protein, TorD	Positive regulator of competence TfoX	missense_variant	MODERATE
R9D4	Chromosome I	2449629	G	A	10637.3	327	1	gac	gaT	Asp340Asp	Methyl-accepting chemotaxis sensor/transducer protein	Uncharacterized protein YbaM	Exodeoxyribonuclease III (EC 3.1.11.2)	synonymous_variant	LOW
R9D4	Chromosome I	2707028	T	C	6108.49	355	1	agc	Ggc	Ser87Gly	Flagellar L-ring protein FlgH	Flagellar P-ring protein FlgI	Flagellar basal-body rod protein FlgG	missense_variant	MODERATE
R9D4	Chromosome I	271747	C	T	7665.18	428.5	1	tgg	tgA	Trp290*	Flavohemoglobin / Nitric oxide dioxygenase (EC 1.14.12.17)	Sodium-type flagellar protein MotX	Nitrite-sensitive transcriptional repressor NsrR	stop_gained	HIGH
R9D4	Chromosome I	2924875	G	A	23641.8	736	1	ccg	cTg	Pro302Leu	Queuine tRNA-ribosyltransferase (EC 2.4.2.29)	Protein translocase subunit YajC	S-adenosylmethionine:tRNA ribosyltransferase-isomerase (EC 2.4.99.17)	missense_variant	MODERATE
R9D4	Chromosome I	296672	C	T	10390.3	361	0.9	ttc	ttT	Phe60Phe	Glutathione-regulated potassium-efflux system protein KefB	Glutathione-regulated potassium-efflux system ancillary protein KefG	Cytoplasmic protein, probably associated with glutathione-regulated potassium-efflux	synonymous_variant	LOW
R9D4	Chromosome I	2989344	A	G	8766.24	295	1	tat	tGt	Tyr196Cys	Two-component transcriptional response regulator BtsR	Sensor histidine kinase BtsS	4-hydroxy-3-methylbut-2-enyl diphosphate reductase (EC 1.17.7.4)	missense_variant	MODERATE
R9D4	Chromosome I	3072957	G	A	8096.53	419.3	1	gca	gTa	Ala489Val	Protein translocase subunit SecA	Mutator MutT protein (7,8-dihydro-8-oxoguanine-triphosphatase) (EC 3.6.1.-)	UDP-3-O-[3-hydroxymyristoyl] N-acetylglucosamine deacetylase (EC 3.5.1.108)	missense_variant	MODERATE
R9D4	Chromosome I	3138438	G	A	7224.74	284.3	0.99	ggc	gAc	Gly486Asp	DNA primase DnaG	Transamidase GatB domain protein	RNA polymerase sigma factor RpoD	missense_variant	MODERATE
R9D4	Chromosome I	3224313	T	C	10967.5	410.7	1	ttc	tCc	Phe141Ser	2',3'-cyclic-nucleotide 2'-phosphodiesterase (EC 3.1.4.16) / 3'-nucleotidase (EC 3.1.3.6)	Uroporphyrinogen-III methyltransferase (EC 2.1.1.107)	cAMP-binding proteins - catabolite gene activator and regulatory subunit of cAMP-dependent protein kinases	missense_variant	MODERATE
R9D4	Chromosome I	3266121	T	C	9364.48	288.5	1	act	Gct	Thr390Ala	Nucleoside-diphosphate sugar epimerase/dehydratase	UDP-glucose 6-dehydrogenase (EC 1.1.1.22)	4-keto-6-deoxy-N-Acetyl-D-hexosaminyl-(Lipid carrier) aminotransferase	missense_variant	MODERATE
R9D4	Chromosome I	3383462	T	C	12622.8	458	0.88	aat	aGt	Asn69Ser	Inner membrane protein YihY, formerly thought to be RNase BN	D-aminoacyl-tRNA deacylase (EC 3.1.1.96)	hypothetical protein	missense_variant	MODERATE
R9D4	Chromosome I	3399751	G	A	10406.7	311	1					FIG01200292: hypothetical protein	Cytochrome c4	intergenic_region	MODIFIER
R9D4	Chromosome I	3464067	A	G	7556.92	253	0.93	act	Gct	Thr5Ala	CzcABC family efflux RND transporter, membrane fusion protein	Transcriptional regulator, AcrR family	RND efflux system, inner membrane transporter	missense_variant	MODERATE
R9D4	Chromosome I	3479126	A	G	10819	403.7	1	agt	agC	Ser182Ser	Shikimate 5-dehydrogenase I alpha (EC 1.1.1.25)	FIG01199611: hypothetical protein	Coproporphyrinogen III oxidase, aerobic (EC 1.3.3.3)	synonymous_variant	LOW
R9D4	Chromosome I	363827	GCCCCTG	GCCCCCTG	86.8996	11	1				SSU rRNA ## 16S rRNA, small subunit ribosomal RNA	Phosphoadenylyl-sulfate reductase [thioredoxin] (EC 1.8.4.8)	LSU rRNA ## 23S rRNA, large subunit ribosomal RNA	intergenic_region	MODIFIER
R9D4	Chromosome I	409323	C	T	7939.81	343.7	1	caa	Taa	Gln113*	MSHA biogenesis protein MshJ	MSHA biogenesis protein MshI	MSHA biogenesis protein MshK	stop_gained	HIGH
R9D4	Chromosome I	458600	C	T	8905.24	333.3	0.99	gcg	gTg	Ala69Val	Acid stress protein IbaG	Phospholipid ABC transporter-binding protein MlaB	UDP-N-acetylglucosamine 1-carboxyvinyltransferase (EC 2.5.1.7)	missense_variant	MODERATE
R9D4	Chromosome I	527274	C	T	9322.58	463.3	1	gct	Act	Ala105Thr	Glutathione synthetase (EC 6.3.2.3)	UPF0301 protein YqgE	16S rRNA (uracil(1498)-N(3))-methyltransferase (EC 2.1.1.193)	missense_variant	MODERATE
R9D4	Chromosome I	534692	T	C	9524.45	309.3	1	aaa	aGa	Lys34Arg	FIG01199603: hypothetical protein	Transketolase (EC 2.2.1.1)	D-erythrose-4-phosphate dehydrogenase (EC 1.2.1.72)	missense_variant	MODERATE
R9D4	Chromosome I	581385	CAGAAGAAGT	CAGAAGAAGAAGT	4937.35	180.3	0.95	gcagaagaagtactt	gCAGAAGAAGAAGTactt	Glu69dup	RNA polymerase sigma factor RpoS	Murein hydrolase activator NlpD	DNA mismatch repair protein MutS	disruptive_inframe_insertion	MODERATE
R9D4	Chromosome I	582373	T	C	23453.6	734	1	agc	Ggc	Ser817Gly	DNA mismatch repair protein MutS	RNA polymerase sigma factor RpoS	Nicotinamide-nucleotide amidase (EC 3.5.1.42)	missense_variant	MODERATE
R9D4	Chromosome I	583902	C	T	7091.1	352.3	1	tgg	tAg	Trp307*	DNA mismatch repair protein MutS	RNA polymerase sigma factor RpoS	Nicotinamide-nucleotide amidase (EC 3.5.1.42)	stop_gained	HIGH
R9D4	Chromosome I	64707	A	G	17305.1	536	1	aaa	aGa	Lys210Arg	3-polyprenyl-4-hydroxybenzoate carboxy-lyase (EC 4.1.1.98)	hypothetical protein	Ferredoxin	missense_variant	MODERATE
R9D4	Chromosome I	651083	C	T	8707	293.7	1	ctc	ctT	Leu14Leu	Ammonium transporter	Nitrogen regulatory protein P-II, GlnK	Ferric iron ABC transporter, iron-binding protein	synonymous_variant	LOW
R9D4	Chromosome I	930077	C	T	5765.49	226.3	1	ggc	ggT	Gly260Gly	Flagellin protein FlaD	Flagellin protein FlaF	Flagellin protein FlaA	synonymous_variant	LOW
R9D4	Chromosome I	949868	A	G	6195.79	306.3	1	gaa	gaG	Glu288Glu	Flagellar motor switch protein FliM	Flagellar basal body-associated protein FliL	Flagellar motor switch protein FliN	synonymous_variant	LOW
R9D4	Chromosome II	1051343	A	G	3059.03	102.3	0.99	gac	gGc	Asp308Gly	Putative two-component response regulator and GGDEF family protein YeaJ	Two-component system response regulator protein	Transcriptional regulator	missense_variant	MODERATE
R9D4	Chromosome II	1258129	A	G	4068.59	130	1	tct	Cct	Ser98Pro	hypothetical protein	Msl2237 protein	putative lipoprotein	missense_variant	MODERATE
R9D4	Chromosome II	1341833	C	A	3801.93	118.7	0.99	gta	Tta	Val30Leu	T6SS component Hcp	VgrG protein	T6SS AAA+ chaperone ClpV (TssH)	missense_variant	MODERATE
R9D4	Chromosome II	1496799	A	G	3067.57	104	0.96	tac	tGc	Tyr49Cys	hypothetical protein	hypothetical protein	hypothetical protein	missense_variant	MODERATE
R9D4	Chromosome II	1594306	G	A	3160.49	115.3	0.99	atc	atT	Ile82Ile	Ribose ABC transporter, ATP-binding protein RbsA (TC 3.A.1.2.1)	Ribose ABC transporter, permease protein RbsC (TC 3.A.1.2.1)	D-ribose pyranase (EC 5.4.99.62)	synonymous_variant	LOW
R9D4	Chromosome II	16220	G	A	5289.65	170	0.99	gcg	gcA	Ala69Ala	FIG01200132: hypothetical protein	Pyrimidine/purine nucleoside phosphorylase PpnP	Chitinase (EC 3.2.1.14)	synonymous_variant	LOW
R9D4	Chromosome II	164021	G	A	5157.98	176.5	0.99	cag	Tag	Gln10*	Transcriptional regulator, LuxR family	Pyridoxamine 5'-phosphate oxidase (EC 1.4.3.5)	hypothetical protein	stop_gained	HIGH
R9D4	Chromosome II	1677285	A	G	6056.3	213	0.9	gag	gGg	Glu96Gly	Molybdopterin-synthase adenylyltransferase (EC 2.7.7.80)	Molybdopterin molybdenumtransferase (EC 2.10.1.1)	hypothetical protein	missense_variant	MODERATE
R9D4	Chromosome II	1680292	G	A	4773.33	144	1	gag	Aag	Glu85Lys	FIG01201220: hypothetical protein	hypothetical protein	3-mercaptopyruvate sulfurtransferase (EC 2.8.1.2)	missense_variant	MODERATE
R9D4	Chromosome II	1772686	T	C	2817.03	90	1	aac	aGc	Asn108Ser	Putative heme iron utilization protein	Pyridoxamine 5'-phosphate oxidase-related putative heme iron utilization protein	Radical SAM family protein HutW, similar to coproporphyrinogen III oxidase, oxygen-independent, associated with heme uptake	missense_variant	MODERATE
R9D4	Chromosome II	1777284	G	A	4898.94	166.3	1	gag	Aag	Glu279Lys	Periplasmic hemin-binding protein	Biopolymer transport protein ExbD1	Hemin ABC transporter, permease protein	missense_variant	MODERATE
R9D4	Chromosome II	2123634	G	A	2866.69	143	1	cca	Tca	Pro80Ser	Uncharacterized N-acetyltransferase YedL	ATPase involved in DNA repair	Histone acetyltransferase HPA2 and related acetyltransferases	missense_variant	MODERATE
R9D4	Chromosome II	2168856	G	A	5619.06	195.3	1	ccg	Tcg	Pro193Ser	L-fucose isomerase (EC 5.3.1.25) @ D-Arabinose ketol-isomerase (EC 5.3.1.3)	L-fuculokinase (EC 2.7.1.51)	Fucose permease	missense_variant	MODERATE
R9D4	Chromosome II	2172049	C	T	4502.82	175	1	gct	Act	Ala128Thr	MarC family integral membrane protein	L-fucose operon activator	hypothetical protein	missense_variant	MODERATE
R9D4	Chromosome II	2213739	G	A	6854.68	216	1	ggt	Agt	Gly345Ser	Serine/threonine:Na+ symporter SstT	Probable GTPase related to EngC	Myo-inositol 2-dehydrogenase 1 (EC 1.1.1.18)	missense_variant	MODERATE
R9D4	Chromosome II	2228918	T	C	5469.18	187.3	1	gtt	gCt	Val53Ala	3-ketoacyl-CoA thiolase (EC 2.3.1.16) @ Acetyl-CoA acetyltransferase (EC 2.3.1.9)	hypothetical protein	Butyrate--acetoacetate CoA-transferase subunit A (EC 2.8.3.9)	missense_variant	MODERATE
R9D4	Chromosome II	2284259	T	C	5453.49	190	0.89	aca	Gca	Thr222Ala	Spindolin-related protein	Phosphoserine phosphatase (EC 3.1.3.3)	Transcriptional regulator, AsnC family	missense_variant	MODERATE
R9D4	Chromosome II	299254	A	G	6326.72	209.7	1	ttt	Ctt	Phe189Leu	hypothetical protein	hypothetical protein	Limit dextrin alpha-1,6-maltotetraose-hydrolase (EC 3.2.1.196)	missense_variant	MODERATE
R9D4	Chromosome II	329282	A	G	9317.69	325	0.92	gct	gcC	Ala34Ala	Hydroxymethylpyrimidine ABC transporter, ATPase component	Hydroxymethylpyrimidine ABC transporter, transmembrane component	Hydroxymethylpyrimidine phosphate kinase ThiD (EC 2.7.4.7)	synonymous_variant	LOW
R9D4	Chromosome II	372034	G	A	3110.17	184.5	1	tca	tTa	Ser82Leu	hypothetical protein sometimes fused to ribosomal protein S6 glutaminyl transferase	MBL-fold metallo-hydrolase superfamily	Ribosomal protein S6--L-glutamate ligase	missense_variant	MODERATE
R9D4	Chromosome II	373541	TAAAAAAAGCG	TAAAAAAAAGCG	3165.94	91	0.95					hypothetical protein	Transcriptional regulator, AcrR family	intergenic_region	MODIFIER
R9D4	Chromosome II	408892	T	C	8095.77	286	0.9	cag	cGg	Gln170Arg	GGDEF domain protein	Malate synthase-related protein	Deoxyribodipyrimidine photolyase, single-strand-specific	missense_variant	MODERATE
R9D4	Chromosome II	419928	T	A	4888.88	184.3	1	ctt	ctA	Leu282Leu	FIG022979: MoxR-like ATPases	Outer membrane receptor protein	hypothetical protein	synonymous_variant	LOW
R9D4	Chromosome II	460450	C	T	8429.99	296	0.9	ggc	gAc	Gly323Asp	Di-tripeptide/cation symporter	Manganese transport protein MntH	L-serine dehydratase, beta subunit (EC 4.3.1.17) / L-serine dehydratase, alpha subunit (EC 4.3.1.17)	missense_variant	MODERATE
R9D4	Chromosome II	532805	A	G	4787.57	179	1	tgt	Cgt	Cys200Arg	Secreted trypsin-like serine protease	FOG: EAL domain protein	Transcriptional regulator, LysR family	missense_variant	MODERATE
R9D4	Chromosome II	549790	T	C	4219.68	147.3	1	ctt	cCt	Leu370Pro	Sensory box/GGDEF family protein ScrC (involved in swarmer cell regulation)	Extracellular solute-binding domain protein GSU1528	2-amino-3-ketobutyrate coenzyme A ligase (EC 2.3.1.29)	missense_variant	MODERATE
R9D4	Chromosome II	615294	A	G	4590.16	166.3	1	acc	Gcc	Thr233Ala	Glutathione synthetase (EC 6.3.2.3)	Nucleoprotein/polynucleotide-associated enzyme	hypothetical protein	missense_variant	MODERATE
R9D4	Chromosome II	680813	T	C	7073.73	241	0.94	gtt	gCt	Val315Ala	Maltodextrin ABC transporter, permease protein MdxF	Maltodextrin ABC transporter, substrate-binding protein MdxE	Maltodextrin ABC transporter, permease protein MdxG	missense_variant	MODERATE
R9D4	Chromosome II	703193	C	T	7874.91	245	1	ttc	ttT	Phe158Phe	FIG01199554: hypothetical protein	AraC-type DNA-binding domain-containing protein	Leucine-rich-repeat protein	synonymous_variant	LOW
R9D4	Chromosome II	719385	A	G	2239.82	74	0.99					Two-component transcriptional response regulator, OmpR family	hypothetical protein	intergenic_region	MODIFIER
R9D4	Chromosome II	863252	T	C	4757.6	141.7	1	ttg	Ctg	Leu130Leu	SAM-dependent methyltransferase	Transcriptional regulator	Acetoacetyl-CoA synthetase (EC 6.2.1.16)	synonymous_variant	LOW
R9D4	Chromosome II	973990	G	A	4432.82	137.7	0.99	gtg	Atg	Val1060Met	hypothetical protein	Tricorn protease N-terminal domain-containing protein	T6SS sigma-54-dependent regulator VasH	missense_variant	MODERATE

## Sheet: R10D4
Libraries	Chromosome	Position	Ref	Var	Score	Var_coverage	Var_fraction	Ref_nt	Var_nt	Ref_aa_pos_change	Function	Upstream_feature	Downstream_feature	Type	snpEff_impact
R10D4	Chromosome I	1072727	A	G	6064.08	215.3	1	cca	ccG	Pro48Pro	Acetaldehyde dehydrogenase (EC 1.2.1.10) / Alcohol dehydrogenase (EC 1.1.1.1)	UPF0056 inner membrane protein YchE	Oxidoreductase, short-chain dehydrogenase/reductase family	synonymous_variant	LOW
R10D4	Chromosome I	1097445	C	T	6628.01	317	1	cgc	Tgc	Arg346Cys	Regulatory protein LuxO	Excinuclease ABC subunit B	Phosphorelay protein LuxU	missense_variant	MODERATE
R10D4	Chromosome I	1102555	C	T	6565.02	148.3	1					Molybdopterin synthase catalytic subunit MoaE (EC 2.8.1.12)	Oligopeptide ABC transporter, substrate-binding protein OppA (TC 3.A.1.5.1)	intergenic_region	MODIFIER
R10D4	Chromosome I	1135663	C	T	1484.39	126	0.64	gcc	Acc	Ala28Thr	Cob(I)alamin adenosyltransferase (EC 2.5.1.17)	AsmA protein	Low molecular weight protein tyrosine phosphatase (EC 3.1.3.48)	missense_variant	MODERATE
R10D4	Chromosome I	1218614	A	G	5619.2	212.7	1					Transcriptional regulator, LysR family	Isochorismatase (EC 3.3.2.1)	intergenic_region	MODIFIER
R10D4	Chromosome I	12446	C	T	8806.5	401	1	gaa	Aaa	Glu219Lys	Glycyl-tRNA synthetase beta chain (EC 6.1.1.14)	Periplasmic alpha-amylase (EC 3.2.1.1)	Glycyl-tRNA synthetase alpha chain (EC 6.1.1.14)	missense_variant	MODERATE
R10D4	Chromosome I	1292850	TAAAAAAAAACAG	TAAAAAAAACAG	4438.14	156	0.96					Ribonucleotide reductase of class Ia (aerobic), alpha subunit (EC 1.17.4.1)	3-demethylubiquinol 3-O-methyltransferase (EC 2.1.1.64) @ 2-polyprenyl-6-hydroxyphenyl methylase (EC 2.1.1.222)	intergenic_region	MODIFIER
R10D4	Chromosome I	1372967	A	G	4684.31	187.7	0.99					hypothetical protein	hypothetical protein	intergenic_region	MODIFIER
R10D4	Chromosome I	1381747	A	G	6937.73	212	1	act	Gct	Thr49Ala	hypothetical protein	FIG01204124: hypothetical protein	hypothetical protein	missense_variant	MODERATE
R10D4	Chromosome I	1382917	A	G	841.493	133	0.55	aga	agG	Arg54Arg	hypothetical protein	hypothetical protein	hypothetical protein	synonymous_variant	LOW
R10D4	Chromosome I	14652	G	A	2399.89	206	0.62	gcc	Acc	Ala47Thr	Putative transmembrane protein	Glycyl-tRNA synthetase alpha chain (EC 6.1.1.14)	NADH dehydrogenase subunit II-related protein	missense_variant	MODERATE
R10D4	Chromosome I	1698968	A	G	2637.7	163	0.65	gtg	gCg	Val41Ala	Type IV prepilin peptidase TadV/CpaA	Transcriptional regulator	Flp pilus assembly protein, pilin Flp	missense_variant	MODERATE
R10D4	Chromosome I	1728792	A	G	5848.39	174.7	0.99	ttc	Ctc	Phe21Leu	Type I secretion system, outer membrane component LapE	T1SS peptidoglycan-associated lipoprotein LapL	T1SS secreted agglutinin RTX	missense_variant	MODERATE
R10D4	Chromosome I	1751908	G	A	5805.81	256.3	1	cct	Tct	Pro111Ser	2-keto-3-deoxy-D-arabino-heptulosonate-7-phosphate synthase I alpha (EC 2.5.1.54)	UPF0234 protein Yitk	FIG01199578: hypothetical protein	missense_variant	MODERATE
R10D4	Chromosome I	1811154	G	A	5362.34	200.3	1	ctg	ctA	Leu309Leu	Spermidine/putrescine import ABC transporter substrate-binding protein PotD (TC 3.A.1.11.1)	Spermidine/putrescine import ABC transporter permease protein PotC (TC 3.A.1.11.1)	hypothetical protein	synonymous_variant	LOW
R10D4	Chromosome I	1981762	G	A	6783.5	230	1	gct	Act	Ala494Thr	Carboxyl-terminal protease	Type IV pilus (Tfp) assembly protein PilF	FIG01206490: hypothetical protein	missense_variant	MODERATE
R10D4	Chromosome I	2063367	T	C	6583.51	216	0.98	gga	ggG	Gly28Gly	FIG010427: hypothetical protein	Cysteine desulfurase (EC 2.8.1.7)	Thioredoxin reductase (EC 1.8.1.9)	synonymous_variant	LOW
R10D4	Chromosome I	2130090	T	C	4906.53	196.3	1	atg	Gtg	Met494Val	Sulfate permease	Heat shock protein HslJ	hypothetical protein	missense_variant	MODERATE
R10D4	Chromosome I	2174903	A	G	1274.17	102	0.6	tac	Cac	Tyr16His	hypothetical protein	Peptide ABC transporter, ATP-binding protein SapF	Manganese-dependent inorganic pyrophosphatase (EC 3.6.1.1)	missense_variant	MODERATE
R10D4	Chromosome I	2184736	T	C	2017.2	143	0.61	gaa	gaG	Glu349Glu	Trimethylamine-N-oxide reductase associated c-type cytochrome, TorC	Trimethylamine-N-oxide reductase (EC 1.7.2.3), TorA	TorE protein	synonymous_variant	LOW
R10D4	Chromosome I	2202589	G	A	5948.26	207	0.96	gcc	gcT	Ala112Ala	Histidinol-phosphate aminotransferase (EC 2.6.1.9)	Histidinol-phosphatase (EC 3.1.3.15) / Imidazoleglycerol-phosphate dehydratase (EC 4.2.1.19)	Histidinol dehydrogenase (EC 1.1.1.23)	synonymous_variant	LOW
R10D4	Chromosome I	221142	A	G	10734	332	1	tat	Cat	Tyr66His	Copper sensory histidine kinase CpxA	Superoxide dismutase [Mn] (EC 1.15.1.1)	Copper-sensing two-component system response regulator CpxR	missense_variant	MODERATE
R10D4	Chromosome I	2236229	T	C	6094.64	223	1	acg	Gcg	Thr43Ala	Leucine-responsive regulatory protein, regulator for leucine (or lrp) regulon and high-affinity branched-chain amino acid transport system	DNA translocase FtsK	Alanine dehydrogenase (EC 1.4.1.1)	missense_variant	MODERATE
R10D4	Chromosome I	2254983	T	C	7382.2	225	1	ggt	ggC	Gly268Gly	Catalase-peroxidase KatG (EC 1.11.1.21)	hypothetical protein	3-hydroxyisobutyrate dehydrogenase family protein	synonymous_variant	LOW
R10D4	Chromosome I	2285029	A	G	8252.6	260	0.98	tat	Cat	Tyr51His	Bll2871 protein	hypothetical protein	Uncharacterized symport/antiport-type transporter	missense_variant	MODERATE
R10D4	Chromosome I	2289263	T	C	5159.67	161	0.99					Transcriptional regulator, GntR family	Transcriptional regulator, MarR family	intergenic_region	MODIFIER
R10D4	Chromosome I	233073	A	G	9408.16	285	1	aac	aGc	Asn244Ser	hypothetical protein	Translation elongation factor P	Nitroreductase family protein	missense_variant	MODERATE
R10D4	Chromosome I	2419462	T	C	6841.89	217	0.98	ctt	cCt	Leu59Pro	TorA-specific chaperone protein, TorD	Trimethylamine-N-oxide operon transcriptional regulatory protein TorR	Purine nucleotide synthesis repressor	missense_variant	MODERATE
R10D4	Chromosome I	2420993	G	A	5633.63	352.7	0.99	gaa	Aaa	Glu205Lys	Purine nucleotide synthesis repressor	TorA-specific chaperone protein, TorD	Positive regulator of competence TfoX	missense_variant	MODERATE
R10D4	Chromosome I	2437311	T	C	825.015	117	0.55	aac	aGc	Asn107Ser	ATP-dependent Clp protease ATP-binding subunit ClpA	Translation initiation factor 1	ATP-dependent Clp protease adaptor protein ClpS	missense_variant	MODERATE
R10D4	Chromosome I	2551112	T	C	10060.5	307	1	aca	Gca	Thr87Ala	ATP-dependent protease La (EC 3.4.21.53) Type I	DNA-binding protein HU-beta	ATP-dependent Clp protease ATP-binding subunit ClpX	missense_variant	MODERATE
R10D4	Chromosome I	2707028	T	C	6108.49	355	1	agc	Ggc	Ser87Gly	Flagellar L-ring protein FlgH	Flagellar P-ring protein FlgI	Flagellar basal-body rod protein FlgG	missense_variant	MODERATE
R10D4	Chromosome I	2725845	T	C	10038.5	318	0.95	tat	Cat	Tyr122His	Lead, cadmium, zinc and mercury transporting ATPase (EC 3.6.3.3) (EC 3.6.3.5)	Chitin outer membrane porin	CopG protein	missense_variant	MODERATE
R10D4	Chromosome I	2830417	G	A	1094.01	158	0.58					Putative Ton-B dependent hemine receptor	DNA-directed RNA polymerase, beta' subunit/160 kD subunit	intergenic_region	MODIFIER
R10D4	Chromosome I	2899448	A	G	6447.52	205	0.97	aag	aGg	Lys392Arg	Exodeoxyribonuclease VII large subunit (EC 3.1.11.6)	Inosine-5'-monophosphate dehydrogenase (EC 1.1.1.205) / CBS domain	Uncharacterized protein YfgJ	missense_variant	MODERATE
R10D4	Chromosome I	2953046	T	C	6377.62	201	0.97	gta	gCa	Val70Ala	Uncharacterized protease YegQ	DNA recombination-dependent growth factor RdgC	Uncharacterized ferredoxin-like protein YfhL	missense_variant	MODERATE
R10D4	Chromosome I	2989344	A	G	8766.24	295	1	tat	tGt	Tyr196Cys	Two-component transcriptional response regulator BtsR	Sensor histidine kinase BtsS	4-hydroxy-3-methylbut-2-enyl diphosphate reductase (EC 1.17.7.4)	missense_variant	MODERATE
R10D4	Chromosome I	3072957	G	A	8096.53	419.3	1	gca	gTa	Ala489Val	Protein translocase subunit SecA	Mutator MutT protein (7,8-dihydro-8-oxoguanine-triphosphatase) (EC 3.6.1.-)	UDP-3-O-[3-hydroxymyristoyl] N-acetylglucosamine deacetylase (EC 3.5.1.108)	missense_variant	MODERATE
R10D4	Chromosome I	3138438	G	A	7224.74	284.3	0.99	ggc	gAc	Gly486Asp	DNA primase DnaG	Transamidase GatB domain protein	RNA polymerase sigma factor RpoD	missense_variant	MODERATE
R10D4	Chromosome I	3224313	T	C	10967.5	410.7	1	ttc	tCc	Phe141Ser	2',3'-cyclic-nucleotide 2'-phosphodiesterase (EC 3.1.4.16) / 3'-nucleotidase (EC 3.1.3.6)	Uroporphyrinogen-III methyltransferase (EC 2.1.1.107)	cAMP-binding proteins - catabolite gene activator and regulatory subunit of cAMP-dependent protein kinases	missense_variant	MODERATE
R10D4	Chromosome I	3399751	G	A	10406.7	311	1					FIG01200292: hypothetical protein	Cytochrome c4	intergenic_region	MODIFIER
R10D4	Chromosome I	3479126	A	G	10819	403.7	1	agt	agC	Ser182Ser	Shikimate 5-dehydrogenase I alpha (EC 1.1.1.25)	FIG01199611: hypothetical protein	Coproporphyrinogen III oxidase, aerobic (EC 1.3.3.3)	synonymous_variant	LOW
R10D4	Chromosome I	3490845	C	T	1263.07	156	0.6	gcg	gTg	Ala449Val	Trk potassium uptake system protein TrkA	16S rRNA (cytosine(967)-C(5))-methyltransferase (EC 2.1.1.176)	Trk potassium uptake system protein TrkH	missense_variant	MODERATE
R10D4	Chromosome I	409323	C	T	7939.81	343.7	1	caa	Taa	Gln113*	MSHA biogenesis protein MshJ	MSHA biogenesis protein MshI	MSHA biogenesis protein MshK	stop_gained	HIGH
R10D4	Chromosome I	458600	C	T	8905.24	333.3	0.99	gcg	gTg	Ala69Val	Acid stress protein IbaG	Phospholipid ABC transporter-binding protein MlaB	UDP-N-acetylglucosamine 1-carboxyvinyltransferase (EC 2.5.1.7)	missense_variant	MODERATE
R10D4	Chromosome I	505964	A	G	1306.91	136	0.57	ttc	Ctc	Phe208Leu	Oxygen-independent coproporphyrinogen-III oxidase-like protein YggW	Glutaminase (EC 3.5.1.2)	Nucleoside 5-triphosphatase RdgB (dHAPTP, dITP, XTP-specific) (EC 3.6.1.66)	missense_variant	MODERATE
R10D4	Chromosome I	527274	C	T	9322.58	463.3	1	gct	Act	Ala105Thr	Glutathione synthetase (EC 6.3.2.3)	UPF0301 protein YqgE	16S rRNA (uracil(1498)-N(3))-methyltransferase (EC 2.1.1.193)	missense_variant	MODERATE
R10D4	Chromosome I	534692	T	C	9524.45	309.3	1	aaa	aGa	Lys34Arg	FIG01199603: hypothetical protein	Transketolase (EC 2.2.1.1)	D-erythrose-4-phosphate dehydrogenase (EC 1.2.1.72)	missense_variant	MODERATE
R10D4	Chromosome I	581385	CAGAAGAAGT	CAGAAGAAGAAGT	4937.35	180.3	0.95	gcagaagaagtactt	gCAGAAGAAGAAGTactt	Glu69dup	RNA polymerase sigma factor RpoS	Murein hydrolase activator NlpD	DNA mismatch repair protein MutS	disruptive_inframe_insertion	MODERATE
R10D4	Chromosome I	583902	C	T	7091.1	352.3	1	tgg	tAg	Trp307*	DNA mismatch repair protein MutS	RNA polymerase sigma factor RpoS	Nicotinamide-nucleotide amidase (EC 3.5.1.42)	stop_gained	HIGH
R10D4	Chromosome I	603260	C	T	7195.34	237	1	gcc	gcT	Ala3Ala	FIG01200315: hypothetical protein	Glutamate--cysteine ligase (EC 6.3.2.2)	S-ribosylhomocysteine lyase (EC 4.4.1.21) @ Autoinducer-2 production protein LuxS	synonymous_variant	LOW
R10D4	Chromosome I	651083	C	T	8707	293.7	1	ctc	ctT	Leu14Leu	Ammonium transporter	Nitrogen regulatory protein P-II, GlnK	Ferric iron ABC transporter, iron-binding protein	synonymous_variant	LOW
R10D4	Chromosome I	684883	G	T	7119.57	242	0.96	tct	tAt	Ser183Tyr	Peptidase, M23/M37 family	RND multidrug efflux transporter	Tyrosyl-tRNA synthetase (EC 6.1.1.1)	missense_variant	MODERATE
R10D4	Chromosome I	849484	A	G	2202.84	152	0.62	gta	gCa	Val55Ala	tRNA (adenine(37)-N6)-methyltransferase	Prolyl-tRNA synthetase (EC 6.1.1.15), bacterial type	LSU ribosomal protein L31p @ LSU ribosomal protein L31p, zinc-independent	missense_variant	MODERATE
R10D4	Chromosome I	909617	C	T	8052.54	263	1	atc	atT	Ile293Ile	hypothetical protein	Uracil permease @ Uracil:proton symporter UraA	hypothetical protein	synonymous_variant	LOW
R10D4	Chromosome I	930077	C	T	5765.49	226.3	1	ggc	ggT	Gly260Gly	Flagellin protein FlaD	Flagellin protein FlaF	Flagellin protein FlaA	synonymous_variant	LOW
R10D4	Chromosome I	937419	A	G	6948.34	217	0.97	aaa	aaG	Lys21Lys	Flagellar sensor histidine kinase FleS	Flagellar regulatory protein FleQ	Flagellar two-component response regulator FleR	synonymous_variant	LOW
R10D4	Chromosome I	949868	A	G	6195.79	306.3	1	gaa	gaG	Glu288Glu	Flagellar motor switch protein FliM	Flagellar basal body-associated protein FliL	Flagellar motor switch protein FliN	synonymous_variant	LOW
R10D4	Chromosome I	960142	A	G	1122.12	121	0.57	gaa	gaG	Glu18Glu	Chemotaxis response - phosphatase CheZ	Chemotaxis regulator - transmits chemoreceptor signals to flagellar motor components CheY	Signal transduction histidine kinase CheA	synonymous_variant	LOW
R10D4	Chromosome II	1051343	A	G	3059.03	102.3	0.99	gac	gGc	Asp308Gly	Putative two-component response regulator and GGDEF family protein YeaJ	Two-component system response regulator protein	Transcriptional regulator	missense_variant	MODERATE
R10D4	Chromosome II	1160306	A	G	870.777	81	0.59	gta	gCa	Val400Ala	Methyl-accepting chemotaxis sensor/transducer protein	hypothetical protein	FIG01201060: hypothetical protein	missense_variant	MODERATE
R10D4	Chromosome II	1330915	T	C	243.848	66	0.53	aga	agG	Arg341Arg	Exonuclease SbcD	Exonuclease SbcC	hypothetical protein	synonymous_variant	LOW
R10D4	Chromosome II	1341833	C	A	3801.93	118.7	0.99	gta	Tta	Val30Leu	T6SS component Hcp	VgrG protein	T6SS AAA+ chaperone ClpV (TssH)	missense_variant	MODERATE
R10D4	Chromosome II	1371070	T	C	180.403	78	0.51	tct	Cct	Ser203Pro	putative lipopolysaccharide modification acyltransferase	hypothetical protein	hypothetical protein	missense_variant	MODERATE
R10D4	Chromosome II	1538705	TGGGGGGGGCCA	TGGGGGGGCCA	501.499	68	0.6	atggccccccccatt	aTGGCCCCCCCAtt	Ile917fs	hypothetical protein	GTP-binding protein Era	hypothetical protein	frameshift_variant	HIGH
R10D4	Chromosome II	1594306	G	A	3160.49	115.3	0.99	atc	atT	Ile82Ile	Ribose ABC transporter, ATP-binding protein RbsA (TC 3.A.1.2.1)	Ribose ABC transporter, permease protein RbsC (TC 3.A.1.2.1)	D-ribose pyranase (EC 5.4.99.62)	synonymous_variant	LOW
R10D4	Chromosome II	16220	G	A	5289.65	170	0.99	gcg	gcA	Ala69Ala	FIG01200132: hypothetical protein	Pyrimidine/purine nucleoside phosphorylase PpnP	Chitinase (EC 3.2.1.14)	synonymous_variant	LOW
R10D4	Chromosome II	1677600	T	C	564.089	69	0.54	gtc	gCc	Val201Ala	Molybdopterin-synthase adenylyltransferase (EC 2.7.7.80)	Molybdopterin molybdenumtransferase (EC 2.10.1.1)	hypothetical protein	missense_variant	MODERATE
R10D4	Chromosome II	1680292	G	A	4773.33	144	1	gag	Aag	Glu85Lys	FIG01201220: hypothetical protein	hypothetical protein	3-mercaptopyruvate sulfurtransferase (EC 2.8.1.2)	missense_variant	MODERATE
R10D4	Chromosome II	1777284	G	A	4898.94	166.3	1	gag	Aag	Glu279Lys	Periplasmic hemin-binding protein	Biopolymer transport protein ExbD1	Hemin ABC transporter, permease protein	missense_variant	MODERATE
R10D4	Chromosome II	1810316	T	C	371.998	65	0.54					Copper/silver efflux RND transporter, transmembrane protein CusA	hypothetical protein	intergenic_region	MODIFIER
R10D4	Chromosome II	1972021	T	C	1427.03	100	0.62	agt	agC	Ser353Ser	Methyl-accepting chemotaxis sensor/transducer protein	Phosphate ABC transporter, substrate-binding protein PstS (TC 3.A.1.7.1)	FIG01205628: hypothetical protein	synonymous_variant	LOW
R10D4	Chromosome II	2168856	G	A	5619.06	195.3	1	ccg	Tcg	Pro193Ser	L-fucose isomerase (EC 5.3.1.25) @ D-Arabinose ketol-isomerase (EC 5.3.1.3)	L-fuculokinase (EC 2.7.1.51)	Fucose permease	missense_variant	MODERATE
R10D4	Chromosome II	2172049	C	T	4502.82	175	1	gct	Act	Ala128Thr	MarC family integral membrane protein	L-fucose operon activator	hypothetical protein	missense_variant	MODERATE
R10D4	Chromosome II	2228918	T	C	5469.18	187.3	1	gtt	gCt	Val53Ala	3-ketoacyl-CoA thiolase (EC 2.3.1.16) @ Acetyl-CoA acetyltransferase (EC 2.3.1.9)	hypothetical protein	Butyrate--acetoacetate CoA-transferase subunit A (EC 2.8.3.9)	missense_variant	MODERATE
R10D4	Chromosome II	2292499	A	G	4288.5	139	1	gac	gGc	Asp61Gly	S-(hydroxymethyl)glutathione dehydrogenase (EC 1.1.1.284)	hypothetical protein	S-formylglutathione hydrolase (EC 3.1.2.12)	missense_variant	MODERATE
R10D4	Chromosome II	299254	A	G	6326.72	209.7	1	ttt	Ctt	Phe189Leu	hypothetical protein	hypothetical protein	Limit dextrin alpha-1,6-maltotetraose-hydrolase (EC 3.2.1.196)	missense_variant	MODERATE
R10D4	Chromosome II	373541	TAAAAAAAGCG	TAAAAAAAAGCG	3165.94	91	0.95					hypothetical protein	Transcriptional regulator, AcrR family	intergenic_region	MODIFIER
R10D4	Chromosome II	419928	T	A	4888.88	184.3	1	ctt	ctA	Leu282Leu	FIG022979: MoxR-like ATPases	Outer membrane receptor protein	hypothetical protein	synonymous_variant	LOW
R10D4	Chromosome II	532805	A	G	4787.57	179	1	tgt	Cgt	Cys200Arg	Secreted trypsin-like serine protease	FOG: EAL domain protein	Transcriptional regulator, LysR family	missense_variant	MODERATE
R10D4	Chromosome II	549790	T	C	4219.68	147.3	1	ctt	cCt	Leu370Pro	Sensory box/GGDEF family protein ScrC (involved in swarmer cell regulation)	Extracellular solute-binding domain protein GSU1528	2-amino-3-ketobutyrate coenzyme A ligase (EC 2.3.1.29)	missense_variant	MODERATE
R10D4	Chromosome II	615294	A	G	4590.16	166.3	1	acc	Gcc	Thr233Ala	Glutathione synthetase (EC 6.3.2.3)	Nucleoprotein/polynucleotide-associated enzyme	hypothetical protein	missense_variant	MODERATE
R10D4	Chromosome II	846544	A	G	1234.21	72	0.65	aac	aGc	Asn4588Ser	hypothetical protein	FIG01200673: hypothetical protein	FIG01202450: hypothetical protein	missense_variant	MODERATE
R10D4	Chromosome II	863252	T	C	4757.6	141.7	1	ttg	Ctg	Leu130Leu	SAM-dependent methyltransferase	Transcriptional regulator	Acetoacetyl-CoA synthetase (EC 6.2.1.16)	synonymous_variant	LOW
R10D4	Chromosome II	911901	C	T	73.2071	62	0.53	ttg	ttA	Leu116Leu	Arylsulfatase (EC 3.1.6.1)	Copper-sensing two-component system response regulator CpxR	Arylsulfatase (EC 3.1.6.1)	synonymous_variant	LOW
R10D4	Chromosome II	973990	G	A	4432.82	137.7	0.99	gtg	Atg	Val1060Met	hypothetical protein	Tricorn protease N-terminal domain-containing protein	T6SS sigma-54-dependent regulator VasH	missense_variant	MODERATE

## Sheet: R11D4
Libraries	Chromosome	Position	Ref	Var	Score	Var_coverage	Var_fraction	Ref_nt	Var_nt	Ref_aa_pos_change	Function	Upstream_feature	Downstream_feature	Type	snpEff_impact
R11D4	Chromosome I	408696	ATTAA	ATAA	4063.63	136	0.96	tcattaaaa	tcATAAaa	Leu386fs	MSHA biogenesis protein MshI	MSHA biogenesis protein MshH	MSHA biogenesis protein MshJ	frameshift_variant	HIGH
R11D4	Chromosome II	138794	C	T	8839.76	288	1	gaa	Aaa	Glu124Lys	hypothetical protein	hypothetical protein	TonB-dependent receptor	missense_variant	MODERATE

[truncated: 1 more sheets: R12D4]
